# Supplementary material for: Global Characterization of the Avian Gut Virome Reveals Extensive Viral Diversity and Functional Implications
Source: Research Square preprint supplement (doi:10.21203/rs.3.rs-6913311/v1), 2025-10-16
Supplement: Supplementary file 1 [file 0c7fcac47d5ed298d82ecb5b.xlsx]

## Sheet: dramv_ARG_argannot
Supplementary Table S5: The detail information of ARGs of avian gut virome identified in a ARG-ANNOT databases.
SEQUENCE	START	END	STRAND	GENE	COVERAGE	COVERAGE_MAP	GAPS	%COVERAGE	%IDENTITY	DATABASE	ACCESSION	PRODUCT	RESISTANCE
contig002358-cat_1_42	1	651	+	(Phe)catA14	1-651/651	===============	0/0	100	95.85	argannot	NG_047573:101-751	(Phe)catA14
contig008023-cat_1_1	1	729	+	(MLS)erm(B)	10-738/738	===============	0/0	98.78	99.59	argannot	M11180:714-1451	(MLS)erm(B)
contig024172-cat_1_3	1	906	+	(AGly)aph(2'')-Id	1-906/906	===============	0/0	100	100	argannot	AF016483:131-1036	(AGly)aph(2'')-Id
contig035293-cat_1_25	1	966	+	(Bla)cfxA4	1-966/966	===============	0/0	100	100	argannot	AY769933:1-966	(Bla)cfxA4
contig058908-cat_1_3	1	651	+	(Phe)catA9	1-651/651	===============	0/0	100	96.62	argannot	K01998:288-938	(Phe)catA9
contig066981-cat_1_9	1	735	+	(MLS)erm(G)	1-735/735	===============	0/0	100	100	argannot	M15332:672-1406	(MLS)erm(G)
contig070200-cat_1_1	1	441	+	(MLS)lnu(C)	1-441/495	==============.	0/0	89.09	99.09	argannot	AY928180:1150-1644	(MLS)lnu(C)
contig077649-cat_1_16	1	735	+	(MLS)erm(G)	1-735/735	===============	0/0	100	99.86	argannot	M15332:672-1406	(MLS)erm(G)
contig090873-cat_1_1	1	495	+	(MLS)lnu(C)	1-495/495	===============	0/0	100	98.99	argannot	AY928180:1150-1644	(MLS)lnu(C)
contig096448-cat_2_6	1	735	+	(MLS)erm(G)	1-735/735	===============	0/0	100	100	argannot	M15332:672-1406	(MLS)erm(G)
contig099669-cat_1_2	23	708	+	(MLS)erm(B)	53-738/738	.==============	0/0	92.95	99.56	argannot	M11180:714-1451	(MLS)erm(B)
contig113615-cat_1_1	1	795	+	(AGly)aph(3'')-III	1-795/795	===============	0/0	100	100	argannot	V01547:535-1329	(AGly)aph(3'')-III
contig115649-cat_2_9	1	735	+	(MLS)erm(G)	1-735/735	===============	0/0	100	100	argannot	M15332:672-1406	(MLS)erm(G)
contig117182-cat_2_7	1	735	+	(MLS)erm(G)	1-735/735	===============	0/0	100	100	argannot	M15332:672-1406	(MLS)erm(G)
contig117586-cat_1_1	1351	1745	+	(Gly)vanA-G	1-395/450	==============.	0/0	87.78	97.47	argannot	AY271782:157-606	(Gly)vanA-G
contig117705-cat_1_1	1351	1745	+	(Gly)vanA-G	1-395/450	==============.	0/0	87.78	97.47	argannot	AY271782:157-606	(Gly)vanA-G
contig123284-cat_1_2	1	855	+	(MLS)erm(X)	1-855/855	========/======	45690	99.88	99.18	argannot	M36726:296-1150	(MLS)erm(X)
contig135003-cat_1_60	1	1218	+	(MLS)mef(A)	1-1218/1218	===============	0/0	100	90.31	argannot	U70055:314-1531	(MLS)mef(A)
contig136695-cat_1_2	1	966	+	(Bla)cfxA4	1-966/966	===============	0/0	100	100	argannot	AY769933:1-966	(Bla)cfxA4
contig138526-cat_1_11	1	735	+	(MLS)erm(G)	1-735/735	===============	0/0	100	100	argannot	M15332:672-1406	(MLS)erm(G)
contig140483-cat_1_7	1	771	+	(AGly)aadD	1-771/771	===============	0/0	100	95.59	argannot	AF181950:3176-3946	(AGly)aadD
contig141689-cat_1_65	1	855	+	(MLS)erm(X)	1-855/855	========/======	45690	99.88	99.18	argannot	M36726:296-1150	(MLS)erm(X)
contig142489-cat_1_1	1	855	+	(MLS)erm(X)	1-855/855	========/======	45690	99.88	99.18	argannot	M36726:296-1150	(MLS)erm(X)
contig142621-cat_1_2	1	855	+	(MLS)erm(X)	1-855/855	========/======	45690	99.88	99.18	argannot	M36726:296-1150	(MLS)erm(X)
contig161695-cat_1_7	1	771	+	(AGly)aadD	1-771/771	===============	0/0	100	95.59	argannot	AF181950:3176-3946	(AGly)aadD
contig164629-cat_2_4	1	891	+	(AGly)aph(2'')-Ic	31-921/921	===============	0/0	96.74	99.89	argannot	U51479:196-1116	(AGly)aph(2'')-Ic
contig169638-cat_1_26	1	966	+	(Bla)cfxA	1-966/966	===============	0/0	100	85.61	argannot	U38243:150-1115	(Bla)cfxA
contig169653-cat_1_30	1	495	+	(MLS)lnu(C)	1-495/495	===============	0/0	100	98.99	argannot	AY928180:1150-1644	(MLS)lnu(C)
contig170271-cat_1_29	1	966	+	(Bla)cfxA	1-966/966	===============	0/0	100	85.61	argannot	U38243:150-1115	(Bla)cfxA
contig173964-cat_1_2	1	735	+	(MLS)erm(Y)	1-735/735	===============	0/0	100	96.33	argannot	AB014481:556-1290	(MLS)erm(Y)
contig175431-cat_1_6	1	735	+	(MLS)erm(Y)	1-735/735	===============	0/0	100	96.33	argannot	AB014481:556-1290	(MLS)erm(Y)
contig180079-cat_1_5	1	735	+	(MLS)erm(Y)	1-735/735	===============	0/0	100	96.05	argannot	AB014481:556-1290	(MLS)erm(Y)
contig180339-cat_1_7	1	735	+	(MLS)erm(Y)	1-735/735	===============	0/0	100	96.33	argannot	AB014481:556-1290	(MLS)erm(Y)
contig182535-cat_1_54	1	1206	+	(MLS)Mef(En2)	1-1206/1206	===============	0/0	100	99.83	argannot	NG_047980:101-1306	(MLS)Mef(En2)
contig195238-cat_2_1	1	842	+	(AGly)ant6-Ia	1-842/909	==============.	0/0	92.63	89.31	argannot	AF330699:22-930	(AGly)ant6-Ia
contig201169-cat_1_7	1	1920	+	(Tet)tetW	1-1920/1920	===============	0/0	100	98.07	argannot	AJ222769:3687-5606	(Tet)tetW
contig203701-cat_2_14	1	735	+	(MLS)erm(B)	1-735/738	===============	0/0	99.59	99.32	argannot	M11180:714-1451	(MLS)erm(B)
contig205438-cat_2_35	1	498	+	(Tmt)dfrG	1-498/498	===============	0/0	100	99.6	argannot	AB205645:1013-1510	(Tmt)dfrG
contig206062-cat_2_36	1	483	+	(Tmt)dfrG	1-483/498	===============	0/0	96.99	100	argannot	AB205645:1013-1510	(Tmt)dfrG
contig210475-cat_1_10	1	1218	+	(MLS)mef(A)	1-1218/1218	===============	0/0	100	91.63	argannot	U70055:314-1531	(MLS)mef(A)
contig210475-cat_1_11	1	1451	+	(MLS)msr(D)	1-1451/1464	===============	0/0	99.11	96.55	argannot	AF274302:2462-3925	(MLS)msr(D)
contig210870-cat_1_1	1	1281	+	(MLS)msr(D)	1-1281/1464	==============.	0/0	87.5	97.66	argannot	AF274302:2462-3925	(MLS)msr(D)
contig210870-cat_1_2	1	1218	+	(MLS)mef(A)	1-1218/1218	===============	0/0	100	91.71	argannot	U70055:314-1531	(MLS)mef(A)
contig212127-cat_1_8	1	1218	+	(MLS)mef(A)	1-1218/1218	===============	0/0	100	96.22	argannot	U70055:314-1531	(MLS)mef(A)
contig212955-cat_1_7	1	1218	+	(MLS)mef(A)	1-1218/1218	===============	0/0	100	91.71	argannot	U70055:314-1531	(MLS)mef(A)
contig214692-cat_1_2	1	1218	+	(MLS)mef(A)	1-1218/1218	===============	0/0	100	91.71	argannot	U70055:314-1531	(MLS)mef(A)
contig216042-cat_1_1	1	735	+	(MLS)erm(G)	1-735/735	===============	0/0	100	100	argannot	M15332:672-1406	(MLS)erm(G)
contig216042-cat_1_4	1	1464	+	(MLS)msr(D)	1-1464/1464	===============	0/0	100	97.61	argannot	AF274302:2462-3925	(MLS)msr(D)
contig216042-cat_1_5	1	1218	+	(MLS)mef(A)	1-1218/1218	===============	0/0	100	91.71	argannot	U70055:314-1531	(MLS)mef(A)
contig220698-cat_1_13	1	1218	+	(MLS)mef(A)	1-1218/1218	===============	0/0	100	91.71	argannot	U70055:314-1531	(MLS)mef(A)
contig220698-cat_1_14	1	1464	+	(MLS)msr(D)	1-1464/1464	===============	0/0	100	97.61	argannot	AF274302:2462-3925	(MLS)msr(D)
contig230278-cat_2_5	97	896	+	(MLS)erm(F)	1-800/801	===============	0/0	99.88	95	argannot	M14730:241-1041	(MLS)erm(F)
contig231134-cat_2_8	97	896	+	(MLS)erm(F)	1-800/801	===============	0/0	99.88	95	argannot	M14730:241-1041	(MLS)erm(F)
contig233597-cat_1_1	1	1920	+	(Tet)tetQ	55-1974/1974	===============	0/0	97.26	98.28	argannot	Z21523:362-2287	(Tet)tetQ
contig233597-cat_1_9	97	896	+	(MLS)erm(F)	1-800/801	===============	0/0	99.88	95	argannot	M14730:241-1041	(MLS)erm(F)
contig234039-cat_2_1	97	896	+	(MLS)erm(F)	1-800/801	===============	0/0	99.88	95	argannot	M14730:241-1041	(MLS)erm(F)
contig235084-cat_2_8	97	798	+	(MLS)erm(F)	1-702/801	==============.	0/0	87.64	95.16	argannot	M14730:241-1041	(MLS)erm(F)
contig239987-cat_1_4	1	840	+	(Sul)sul1	1-840/840	===============	0/0	100	100	argannot	AF071413:6700-7539	(Sul)sul1
contig239987-cat_1_6	1	780	+	(AGly)aadA2	1-780/780	===============	0/0	100	100	argannot	X68227:66-945	(AGly)aadA2
contig241807-cat_1_1	1	855	+	(MLS)erm(X)	1-855/855	========/======	45690	99.88	96.38	argannot	M36726:296-1150	(MLS)erm(X)
contig244222-cat_1_1	1	855	+	(MLS)erm(X)	1-855/855	========/======	45690	99.88	96.38	argannot	M36726:296-1150	(MLS)erm(X)
contig244825-cat_1_1	1	855	+	(MLS)erm(X)	1-855/855	========/======	45690	99.88	96.38	argannot	M36726:296-1150	(MLS)erm(X)
contig246052-cat_1_17	1	855	+	(MLS)erm(X)	1-855/855	========/======	45690	99.88	96.38	argannot	M36726:296-1150	(MLS)erm(X)
contig246204-cat_1_1	1	855	+	(MLS)erm(X)	1-855/855	========/======	45690	99.88	96.38	argannot	M36726:296-1150	(MLS)erm(X)
contig246318-cat_1_1	1	855	+	(MLS)erm(X)	1-855/855	========/======	45690	99.88	96.38	argannot	M36726:296-1150	(MLS)erm(X)
contig246478-cat_1_1	1	855	+	(MLS)erm(X)	1-855/855	========/======	45690	99.88	96.38	argannot	M36726:296-1150	(MLS)erm(X)
contig246486-cat_1_1	1	855	+	(MLS)erm(X)	1-855/855	========/======	45690	99.88	96.38	argannot	M36726:296-1150	(MLS)erm(X)
contig246586-cat_1_1	1	855	+	(MLS)erm(X)	1-855/855	========/======	45690	99.88	96.38	argannot	M36726:296-1150	(MLS)erm(X)
contig246605-cat_1_1	1	855	+	(MLS)erm(X)	1-855/855	========/======	45690	99.88	96.38	argannot	M36726:296-1150	(MLS)erm(X)
contig246643-cat_1_1	1	855	+	(MLS)erm(X)	1-855/855	========/======	45690	99.88	96.38	argannot	M36726:296-1150	(MLS)erm(X)
contig246824-cat_1_1	1	855	+	(MLS)erm(X)	1-855/855	========/======	45690	99.88	96.38	argannot	M36726:296-1150	(MLS)erm(X)
contig246911-cat_1_1	1	855	+	(MLS)erm(X)	1-855/855	========/======	45690	99.88	96.38	argannot	M36726:296-1150	(MLS)erm(X)
contig249664-cat_1_6	1	780	+	(AGly)aadA2	1-780/780	===============	0/0	100	100	argannot	X68227:66-945	(AGly)aadA2
contig249664-cat_1_8	1	840	+	(Sul)sul1	1-840/840	===============	0/0	100	100	argannot	AF071413:6700-7539	(Sul)sul1
contig250992-cat_1_10	1	495	+	(MLS)lnu(D)	1-495/495	===============	0/0	100	83.84	argannot	EF452177:19-513	(MLS)lnu(D)
contig251069-cat_1_2	1	900	+	(AGly)aph(2'')-Ib	1-900/900	===============	0/0	100	84.89	argannot	AF207840:272-1171	(AGly)aph(2'')-Ib
contig251069-cat_1_3	1	537	+	(AGly)aac6-Im	1-537/537	===============	0/0	100	89.2	argannot	AF337947:1215-1751	(AGly)aac6-Im
contig253142-cat_1_1	1	855	+	(MLS)erm(X)	1-855/855	========/======	45690	99.88	96.38	argannot	M36726:296-1150	(MLS)erm(X)
contig254216-cat_1_1	1	855	+	(MLS)erm(X)	1-855/855	========/======	45690	99.88	96.38	argannot	M36726:296-1150	(MLS)erm(X)
contig254280-cat_1_1	1	855	+	(MLS)erm(X)	1-855/855	========/======	45690	99.88	96.38	argannot	M36726:296-1150	(MLS)erm(X)
contig254687-cat_1_1	1	855	+	(MLS)erm(X)	1-855/855	========/======	45690	99.88	96.38	argannot	M36726:296-1150	(MLS)erm(X)
contig254699-cat_1_1	1	855	+	(MLS)erm(X)	1-855/855	========/======	45690	99.88	96.38	argannot	M36726:296-1150	(MLS)erm(X)
contig254862-cat_1_1	1	855	+	(MLS)erm(X)	1-855/855	========/======	45690	99.88	96.38	argannot	M36726:296-1150	(MLS)erm(X)
contig254877-cat_1_1	1	855	+	(MLS)erm(X)	1-855/855	========/======	45690	99.88	96.38	argannot	M36726:296-1150	(MLS)erm(X)
contig254970-cat_1_1	1	855	+	(MLS)erm(X)	1-855/855	========/======	45690	99.88	96.38	argannot	M36726:296-1150	(MLS)erm(X)
contig255535-cat_1_6	1	1920	+	(Tet)tetW	1-1920/1920	===============	0/0	100	98.23	argannot	AJ222769:3687-5606	(Tet)tetW
contig256862-cat_1_2	1	900	+	(AGly)aph(2'')-Ib	1-900/900	===============	0/0	100	84.89	argannot	AF207840:272-1171	(AGly)aph(2'')-Ib
contig256862-cat_1_3	1	537	+	(AGly)aac6-Im	1-537/537	===============	0/0	100	89.2	argannot	AF337947:1215-1751	(AGly)aac6-Im
contig258480-cat_1_6	1	705	+	(AGly)aph3-VIIa	49-753/753	===============	0/0	93.63	84.68	argannot	M29953:131-1036	(AGly)aph3-VIIa
contig263647-cat_1_17	1	855	+	(MLS)erm(X)	1-855/855	========/======	45690	99.88	96.38	argannot	M36726:296-1150	(MLS)erm(X)
contig263751-cat_1_1	1	855	+	(MLS)erm(X)	1-855/855	========/======	45690	99.88	96.38	argannot	M36726:296-1150	(MLS)erm(X)
contig272900-cat_1_1	1	855	+	(Bla)aci1	1-855/855	===============	0/0	100	99.77	argannot	AJ007350:240-1094	(Bla)aci1
contig275483-cat_1_1	1	1218	+	(MLS)mef(A)	1-1218/1218	===============	0/0	100	90.07	argannot	U70055:314-1531	(MLS)mef(A)
contig275483-cat_1_2	1	1246	+	(MLS)msr(D)	1-1246/1464	=============..	0/0	85.11	97.03	argannot	AF274302:2462-3925	(MLS)msr(D)
contig278235-cat_1_75	1	855	+	(Bla)aci1	1-855/855	===============	0/0	100	99.77	argannot	AJ007350:240-1094	(Bla)aci1
contig294536-cat_1_10	1	495	+	(MLS)lnu(D)	1-495/495	===============	0/0	100	83.84	argannot	EF452177:19-513	(MLS)lnu(D)
contig301070-cat_1_6	1	735	+	(MLS)erm(G)	1-735/735	===============	0/0	100	100	argannot	M15332:672-1406	(MLS)erm(G)
