# Supplementary material for: Global Characterization of the Avian Gut Virome Reveals Extensive Viral Diversity and Functional Implications
Source: Research Square preprint supplement (doi:10.21203/rs.3.rs-6913311/v1), 2025-10-16
Supplement: Supplementary file 2 [file 0e15c21dc2cc893ae4118906.xlsx]

## Sheet: Supplementary table 2
Supplementary Table S2: The quality of vOTUs checked by CheckV.
study_id	contig_id	vOTU_id	contig_length	checkv_provirus	checkv_quality_score	checkv_completeness	checkv_contamination	checkv_completeness_method
ma2024imeta	contig000016	vOTU000982	27557	No	2	100	0	AAI-based (medium-confidence)
ma2024imeta	contig000076	vOTU000038	44280	No	2	100	0	AAI-based (medium-confidence)
ma2024imeta	contig000120	vOTU000053	54561	No	2	100	0	AAI-based (medium-confidence)
ma2024imeta	contig000144	vOTU000063	38547	No	2	100	0	AAI-based (high-confidence)
ma2024imeta	contig000193	vOTU000080	89378	No	1	100	0	DTR (high-confidence)
ma2024imeta	contig000196	vOTU108632	35902	No	1	100	0	DTR (high-confidence)
ma2024imeta	contig000197	vOTU061438	57344	No	1	100	0	DTR (high-confidence)
ma2024imeta	contig000209	vOTU000084	61735	No	1	100	0	DTR (high-confidence)
ma2024imeta	contig000222	vOTU000089	77243	No	2	100	0	AAI-based (medium-confidence)
ma2024imeta	contig000223	vOTU000221	95072	No	1	100	0	DTR (high-confidence)
ma2024imeta	contig000226	vOTU000584	54646	No	1	100	0	DTR (high-confidence)
ma2024imeta	contig000227	vOTU062101	44796	No	1	100	0	DTR (high-confidence)
ma2024imeta	contig000228	vOTU014304	43823	No	1	100	0	DTR (high-confidence)
ma2024imeta	contig000231	vOTU000092	50918	No	1	100	0	DTR (high-confidence)
ma2024imeta	contig000275	vOTU000111	37482	No	1	100	0	DTR (high-confidence)
ma2024imeta	contig000320	vOTU000133	53300	No	2	100	0	AAI-based (high-confidence)
ma2024imeta	contig000341	vOTU000139	41002	No	2	100	0	AAI-based (medium-confidence)
ma2024imeta	contig000434	vOTU000335	39455	No	1	100	0	DTR (high-confidence)
ma2024imeta	contig000451	vOTU064886	35013	No	2	100	0	AAI-based (medium-confidence)
ma2024imeta	contig000513	vOTU000184	102588	No	1	100	0	DTR (high-confidence)
ma2024imeta	contig000562	vOTU084799	36095	No	1	100	0	DTR (medium-confidence)
ma2024imeta	contig000661	vOTU000223	51796	No	1	100	0	DTR (high-confidence)
ma2024imeta	contig000662	vOTU000224	34856	No	1	100	0	DTR (high-confidence)
ma2024imeta	contig000664	vOTU000225	61846	No	1	100	0	DTR (high-confidence)
ma2024imeta	contig000666	vOTU052477	14179	No	1	100	0	DTR (high-confidence)
ma2024imeta	contig000667	vOTU000226	41066	No	1	100	0	DTR (high-confidence)
ma2024imeta	contig000672	vOTU000228	41442	No	1	100	0	DTR (high-confidence)
ma2024imeta	contig000725	vOTU000246	58258	No	1	100	0	DTR (high-confidence)
ma2024imeta	contig000806	vOTU062187	39057	No	2	100	0	AAI-based (high-confidence)
ma2024imeta	contig000835	vOTU000273	34452	No	1	100	0	DTR (high-confidence)
ma2024imeta	contig000843	vOTU138937	59927	No	2	100	0	AAI-based (medium-confidence)
ma2024imeta	contig000871	vOTU047812	60480	No	2	100	0	AAI-based (high-confidence)
ma2024imeta	contig000901	vOTU013267	37044	No	1	100	0	DTR (high-confidence)
ma2024imeta	contig001063	vOTU000337	38313	No	1	100	0	DTR (high-confidence)
ma2024imeta	contig001073	vOTU000339	39200	No	1	100	0	DTR (high-confidence)
ma2024imeta	contig001117	vOTU000351	43595	No	1	100	0	DTR (high-confidence)
ma2024imeta	contig001232	vOTU000398	39135	No	1	100	0	DTR (high-confidence)
ma2024imeta	contig001284	vOTU000422	36061	No	1	100	0	DTR (high-confidence)
ma2024imeta	contig001294	vOTU000428	38631	No	1	100	0	DTR (high-confidence)
ma2024imeta	contig001321	vOTU036122	42855	No	1	100	0	DTR (high-confidence)
ma2024imeta	contig001354	vOTU000454	24818	No	2	100	0	AAI-based (high-confidence)
ma2024imeta	contig001374	vOTU000462	51246	No	1	100	0	DTR (high-confidence)
ma2024imeta	contig001378	vOTU000463	43648	No	1	100	0	DTR (high-confidence)
ma2024imeta	contig001421	vOTU000480	12450	No	2	100	0	AAI-based (medium-confidence)
ma2024imeta	contig001481	vOTU000511	53395	No	1	100	0	DTR (high-confidence)
ma2024imeta	contig001486	vOTU000512	40543	No	1	100	0	DTR (high-confidence)
ma2024imeta	contig001496	vOTU000518	48302	No	1	100	0	DTR (high-confidence)
ma2024imeta	contig001564	vOTU000548	119716	No	2	100	0	AAI-based (high-confidence)
ma2024imeta	contig001588	vOTU000558	62029	No	2	100	0	AAI-based (medium-confidence)
ma2024imeta	contig001601	vOTU000568	100330	No	1	100	0	DTR (high-confidence)
ma2024imeta	contig001632	vOTU000587	43851	No	1	100	0	DTR (high-confidence)
ma2024imeta	contig001645	vOTU000593	177191	No	1	100	0	DTR (high-confidence)
ma2024imeta	contig001650	vOTU000596	38782	No	1	100	0	DTR (high-confidence)
ma2024imeta	contig001779	vOTU013344	48236	No	2	100	0	AAI-based (medium-confidence)
ma2024imeta	contig001795	vOTU000666	36105	No	1	100	0	DTR (medium-confidence)
ma2024imeta	contig001838	vOTU126618	11675	No	2	100	0	AAI-based (medium-confidence)
ma2024imeta	contig001861	vOTU000691	39494	No	1	100	0	DTR (medium-confidence)
ma2024imeta	contig001866	vOTU000693	165626	No	2	100	0	AAI-based (high-confidence)
ma2024imeta	contig001915	vOTU061147	31953	No	1	100	0	DTR (high-confidence)
ma2024imeta	contig001923	vOTU123315	63359	No	1	100	0	DTR (high-confidence)
ma2024imeta	contig001956	vOTU000720	5385	No	2	100	0	AAI-based (medium-confidence)
ma2024imeta	contig001989	vOTU000730	59514	No	1	100	0	DTR (high-confidence)
ma2024imeta	contig001990	vOTU000731	34897	No	1	100	0	DTR (high-confidence)
ma2024imeta	contig001993	vOTU000732	36701	No	1	100	0	DTR (high-confidence)
ma2024imeta	contig002098	vOTU000760	33336	No	2	100	0	AAI-based (medium-confidence)
ma2024imeta	contig002173	vOTU000796	38944	No	2	100	0	AAI-based (medium-confidence)
ma2024imeta	contig002196	vOTU000805	37018	No	2	100	0	AAI-based (high-confidence)
ma2024imeta	contig002228	vOTU138713	51200	No	2	100	0	AAI-based (high-confidence)
ma2024imeta	contig002248	vOTU000826	41527	No	2	100	0	AAI-based (medium-confidence)
ma2024imeta	contig002295	vOTU000840	51282	No	2	100	0	AAI-based (high-confidence)
ma2024imeta	contig002349	vOTU116033	46624	No	1	100	0	DTR (high-confidence)
ma2024imeta	contig002412	vOTU000884	53044	No	1	100	0	DTR (high-confidence)
ma2024imeta	contig002419	vOTU084318	59737	No	1	100	0	DTR (high-confidence)
ma2024imeta	contig002420	vOTU000888	42445	No	1	100	0	DTR (high-confidence)
ma2024imeta	contig002428	vOTU000894	12508	No	2	100	0	AAI-based (medium-confidence)
ma2024imeta	contig002431	vOTU000896	228631	No	1	100	0	DTR (medium-confidence)
ma2024imeta	contig002432	vOTU000897	53167	No	1	100	0	DTR (high-confidence)
ma2024imeta	contig002433	vOTU000898	38359	No	1	100	0	DTR (medium-confidence)
ma2024imeta	contig002435	vOTU000900	65504	No	1	100	0	DTR (high-confidence)
ma2024imeta	contig002438	vOTU000902	45865	No	1	100	0	DTR (high-confidence)
ma2024imeta	contig002441	vOTU000904	10930	No	1	100	0	DTR (high-confidence)
ma2024imeta	contig002522	vOTU000679	18496	No	1	100	0	ITR (medium-confidence)
ma2024imeta	contig002579	vOTU000954	52035	No	1	100	0	DTR (high-confidence)
ma2024imeta	contig002634	vOTU000977	12976	No	1	100	0	ITR (high-confidence)
ma2024imeta	contig002671	vOTU000993	188594	No	2	100	0	AAI-based (medium-confidence)
ma2024imeta	contig002673	vOTU000994	42491	No	1	100	0	DTR (high-confidence)
ma2024imeta	contig002714	vOTU001019	57516	No	2	100	0	AAI-based (medium-confidence)
ma2024imeta	contig002723	vOTU001022	58790	No	1	100	0	DTR (high-confidence)
ma2024imeta	contig002738	vOTU001028	48738	No	1	100	0	DTR (high-confidence)
ma2024imeta	contig002754	vOTU001036	82703	No	2	100	0	AAI-based (high-confidence)
ma2024imeta	contig002850	vOTU062093	38616	No	2	100	0	AAI-based (medium-confidence)
ma2024imeta	contig002862	vOTU109778	32550	No	1	100	0	DTR (high-confidence)
ma2024imeta	contig002887	vOTU001092	117547	No	2	100	0	AAI-based (medium-confidence)
ma2024imeta	contig002890	vOTU001094	39342	No	1	100	0	DTR (high-confidence)
ma2024imeta	contig002994	vOTU001265	59817	No	1	100	0	DTR (high-confidence)
ma2024imeta	contig003002	vOTU001154	188012	No	1	100	0	DTR (high-confidence)
ma2024imeta	contig003003	vOTU001155	27646	No	1	100	0	DTR (medium-confidence)
ma2024imeta	contig003006	vOTU001157	42663	No	1	100	0	DTR (high-confidence)
ma2024imeta	contig003007	vOTU001158	38180	No	1	100	0	DTR (high-confidence)
ma2024imeta	contig003012	vOTU001163	51462	No	1	100	0	DTR (high-confidence)
ma2024imeta	contig003015	vOTU012911	17278	No	1	100	0	DTR (high-confidence)
ma2024imeta	contig003016	vOTU001164	33877	No	1	100	0	DTR (high-confidence)
ma2024imeta	contig003017	vOTU001165	6359	No	1	100	0	DTR (high-confidence)
ma2024imeta	contig003020	vOTU001167	5461	No	1	100	0	DTR (high-confidence)
ma2024imeta	contig003075	vOTU001189	36596	No	1	100	0	DTR (high-confidence)
ma2024imeta	contig003127	vOTU001214	54518	No	2	100	0	AAI-based (high-confidence)
ma2024imeta	contig003212	vOTU001255	47230	No	2	100	0	AAI-based (medium-confidence)
ma2024imeta	contig003217	vOTU130699	39818	No	1	100	0	DTR (medium-confidence)
ma2024imeta	contig003224	vOTU138867	49052	No	1	100	0	DTR (high-confidence)
ma2024imeta	contig003275	vOTU001291	36938	No	2	100	0	AAI-based (high-confidence)
ma2024imeta	contig003290	vOTU001879	119248	No	1	100	0	DTR (medium-confidence)
ma2024imeta	contig003315	vOTU001299	38648	No	1	100	0	DTR (high-confidence)
ma2024imeta	contig003321	vOTU001300	37368	No	1	100	0	DTR (high-confidence)
ma2024imeta	contig003355	vOTU001310	38785	No	1	100	0	DTR (high-confidence)
ma2024imeta	contig003376	vOTU001319	38801	No	1	100	0	DTR (high-confidence)
ma2024imeta	contig003438	vOTU001339	39815	No	1	100	0	DTR (high-confidence)
ma2024imeta	contig003440	vOTU001340	5913	No	1	100	0	DTR (high-confidence)
ma2024imeta	contig003479	vOTU001352	51096	No	2	100	0	AAI-based (medium-confidence)
ma2024imeta	contig003522	vOTU001370	38722	No	1	100	0	DTR (high-confidence)
ma2024imeta	contig003524	vOTU001371	35552	No	1	100	0	DTR (medium-confidence)
ma2024imeta	contig003545	vOTU001377	17205	No	1	100	0	ITR (medium-confidence)
ma2024imeta	contig003579	vOTU001394	34292	No	2	100	0	AAI-based (high-confidence)
ma2024imeta	contig003605	vOTU064717	48810	No	2	100	0	AAI-based (high-confidence)
ma2024imeta	contig003641	vOTU001412	43630	No	1	100	0	DTR (high-confidence)
ma2024imeta	contig003650	vOTU001415	33406	No	1	100	0	DTR (high-confidence)
ma2024imeta	contig003651	vOTU001416	5222	No	1	100	0	DTR (high-confidence)
ma2024imeta	contig003652	vOTU001417	53352	No	2	100	0	AAI-based (high-confidence)
ma2024imeta	contig003714	vOTU001440	5595	No	2	100	0	AAI-based (medium-confidence)
ma2024imeta	contig003771	vOTU001462	51871	No	2	100	0	AAI-based (high-confidence)
ma2024imeta	contig003776	vOTU111071	13359	No	2	100	0	AAI-based (high-confidence)
ma2024imeta	contig003823	vOTU001486	38546	No	1	100	0	DTR (high-confidence)
ma2024imeta	contig003970	vOTU001538	48651	No	1	100	0	DTR (high-confidence)
ma2024imeta	contig003972	vOTU001540	40482	No	1	100	0	DTR (high-confidence)
ma2024imeta	contig003982	vOTU001547	185795	No	1	100	0	DTR (high-confidence)
ma2024imeta	contig004015	vOTU001565	23136	No	2	100	0	AAI-based (medium-confidence)
ma2024imeta	contig004087	vOTU001601	42244	No	2	100	0	AAI-based (medium-confidence)
ma2024imeta	contig004151	vOTU001641	45426	No	2	100	0	AAI-based (high-confidence)
ma2024imeta	contig004189	vOTU001658	37295	No	2	100	0	AAI-based (medium-confidence)
ma2024imeta	contig004200	vOTU001664	48386	No	2	100	0	AAI-based (high-confidence)
ma2024imeta	contig004269	vOTU061269	58563	No	2	100	0	AAI-based (high-confidence)
ma2024imeta	contig004273	vOTU001703	28627	No	1	100	0	DTR (medium-confidence)
ma2024imeta	contig004304	vOTU001717	32721	No	1	100	0	DTR (high-confidence)
ma2024imeta	contig004307	vOTU013807	46198	No	2	100	0	AAI-based (medium-confidence)
ma2024imeta	contig004343	vOTU001737	33336	No	1	100	0	DTR (medium-confidence)
ma2024imeta	contig004346	vOTU001740	44821	No	1	100	0	DTR (high-confidence)
ma2024imeta	contig004360	vOTU001749	224058	No	1	100	0	DTR (medium-confidence)
ma2024imeta	contig004362	vOTU001750	35052	No	1	100	0	DTR (high-confidence)
ma2024imeta	contig004363	vOTU001751	47301	No	1	100	0	DTR (high-confidence)
ma2024imeta	contig004365	vOTU001753	41058	No	2	100	0	AAI-based (medium-confidence)
ma2024imeta	contig004405	vOTU001774	46009	No	2	100	0	AAI-based (medium-confidence)
ma2024imeta	contig004498	vOTU001805	15478	No	2	100	0	AAI-based (medium-confidence)
ma2024imeta	contig004511	vOTU001810	11530	No	2	100	0	AAI-based (medium-confidence)
ma2024imeta	contig004520	vOTU001812	40824	No	1	100	0	DTR (high-confidence)
ma2024imeta	contig004538	vOTU001819	37845	No	1	100	0	DTR (high-confidence)
ma2024imeta	contig004543	vOTU001821	128440	No	2	100	0	AAI-based (medium-confidence)
ma2024imeta	contig004566	vOTU001830	35316	No	1	100	0	DTR (high-confidence)
ma2024imeta	contig004650	vOTU001859	30224	No	1	100	0	DTR (high-confidence)
ma2024imeta	contig004665	vOTU060322	37103	No	1	100	0	DTR (high-confidence)
ma2024imeta	contig004733	vOTU001888	40365	No	1	100	0	DTR (high-confidence)
ma2024imeta	contig004744	vOTU001891	41196	No	1	100	0	DTR (medium-confidence)
ma2024imeta	contig004835	vOTU001929	43855	No	1	100	0	DTR (high-confidence)
ma2024imeta	contig004893	vOTU001953	43215	No	1	100	0	DTR (high-confidence)
ma2024imeta	contig004963	vOTU001968	39414	No	1	100	0	DTR (high-confidence)
ma2024imeta	contig005116	vOTU002006	61210	No	2	100	0	AAI-based (high-confidence)
ma2024imeta	contig005351	vOTU002092	33476	No	2	100	0	AAI-based (high-confidence)
ma2024imeta	contig005480	vOTU002138	35399	No	1	100	0	DTR (high-confidence)
ma2024imeta	contig005493	vOTU002142	46952	No	1	100	0	DTR (high-confidence)
ma2024imeta	contig005611	vOTU002187	61142	No	2	100	0	AAI-based (medium-confidence)
ma2024imeta	contig005623	vOTU002193	36843	No	1	100	0	DTR (high-confidence)
ma2024imeta	contig005668	vOTU009220	46213	No	2	100	0	AAI-based (high-confidence)
ma2024imeta	contig005799	vOTU002275	40554	No	2	100	0	AAI-based (high-confidence)
ma2024imeta	contig005800	vOTU002276	94608	No	1	100	0	DTR (high-confidence)
ma2024imeta	contig005827	vOTU018828	47927	No	2	100	0	AAI-based (medium-confidence)
ma2024imeta	contig005845	vOTU002295	138863	No	1	100	0	DTR (high-confidence)
ma2024imeta	contig005847	vOTU002296	50935	No	1	100	0	DTR (high-confidence)
ma2024imeta	contig005852	vOTU002300	35590	No	2	100	0	AAI-based (high-confidence)
ma2024imeta	contig005854	vOTU002301	45150	No	2	100	0	AAI-based (high-confidence)
ma2024imeta	contig005880	vOTU002316	59199	No	1	100	0	DTR (high-confidence)
ma2024imeta	contig005883	vOTU002318	36512	No	2	100	0	AAI-based (high-confidence)
ma2024imeta	contig005913	vOTU002336	63422	No	2	100	0	AAI-based (medium-confidence)
ma2024imeta	contig005934	vOTU002345	51609	No	1	100	0	DTR (medium-confidence)
ma2024imeta	contig005974	vOTU002372	42094	No	2	100	0	AAI-based (high-confidence)
ma2024imeta	contig005984	vOTU002377	62608	No	2	100	0	AAI-based (high-confidence)
ma2024imeta	contig005994	vOTU002381	51003	No	2	100	0	AAI-based (medium-confidence)
ma2024imeta	contig006055	vOTU002422	46050	No	2	100	0	AAI-based (medium-confidence)
ma2024imeta	contig006166	vOTU002481	33487	No	1	100	0	DTR (medium-confidence)
ma2024imeta	contig006182	vOTU002492	73407	No	1	100	0	DTR (high-confidence)
ma2024imeta	contig006185	vOTU002494	82520	No	1	100	0	DTR (high-confidence)
ma2024imeta	contig006187	vOTU002495	43393	No	1	100	0	DTR (high-confidence)
ma2024imeta	contig006190	vOTU002497	41641	No	1	100	0	DTR (high-confidence)
ma2024imeta	contig006194	vOTU021311	83570	No	1	100	0	DTR (high-confidence)
ma2024imeta	contig006196	vOTU002500	35658	No	1	100	0	DTR (medium-confidence)
ma2024imeta	contig006222	vOTU002511	93712	No	2	100	0	AAI-based (medium-confidence)
ma2024imeta	contig006281	vOTU002545	49331	No	1	100	0	DTR (high-confidence)
ma2024imeta	contig006298	vOTU002552	50353	No	2	100	0	AAI-based (high-confidence)
ma2024imeta	contig006358	vOTU002582	63702	No	1	100	0	DTR (high-confidence)
ma2024imeta	contig006416	vOTU002611	44085	No	2	100	0	AAI-based (high-confidence)
ma2024imeta	contig006425	vOTU002616	41658	No	1	100	0	DTR (high-confidence)
ma2024imeta	contig006426	vOTU108657	38345	Yes	2	100	4.9	AAI-based (high-confidence)
ma2024imeta	contig006436	vOTU002620	64841	No	1	100	0	DTR (medium-confidence)
ma2024imeta	contig006437	vOTU002621	133668	No	1	100	0	DTR (medium-confidence)
ma2024imeta	contig006441	vOTU002624	20967	No	1	100	0	DTR (high-confidence)
ma2024imeta	contig006442	vOTU002625	50466	No	1	100	0	DTR (high-confidence)
ma2024imeta	contig006449	vOTU002629	5511	No	1	100	0	DTR (high-confidence)
ma2024imeta	contig006450	vOTU002630	6438	No	1	100	0	DTR (high-confidence)
ma2024imeta	contig006470	vOTU002638	37003	No	1	100	0	DTR (high-confidence)
ma2024imeta	contig006482	vOTU002642	33430	No	1	100	0	DTR (high-confidence)
ma2024imeta	contig006522	vOTU002660	42018	No	2	100	0	AAI-based (medium-confidence)
ma2024imeta	contig006628	vOTU002719	46092	No	2	100	0	AAI-based (medium-confidence)
ma2024imeta	contig006657	vOTU002729	58427	No	2	100	0	AAI-based (high-confidence)
ma2024imeta	contig006719	vOTU002754	42292	No	1	100	0	DTR (high-confidence)
ma2024imeta	contig006720	vOTU002755	162703	No	1	100	0	DTR (high-confidence)
ma2024imeta	contig006721	vOTU002756	38023	No	1	100	0	DTR (high-confidence)
ma2024imeta	contig006727	vOTU002760	31222	No	2	100	0	AAI-based (medium-confidence)
ma2024imeta	contig006799	vOTU002797	40093	No	1	100	0	DTR (medium-confidence)
ma2024imeta	contig006865	vOTU002829	40524	No	2	100	0	AAI-based (high-confidence)
ma2024imeta	contig006875	vOTU002833	86757	No	1	100	0	DTR (high-confidence)
ma2024imeta	contig006902	vOTU002847	45149	No	2	100	0	AAI-based (medium-confidence)
ma2024imeta	contig006944	vOTU002876	47758	No	1	100	0	DTR (high-confidence)
ma2024imeta	contig006950	vOTU002881	140434	No	1	100	0	DTR (high-confidence)
ma2024imeta	contig006953	vOTU002882	85069	No	1	100	0	DTR (high-confidence)
ma2024imeta	contig006955	vOTU002884	37394	No	1	100	0	DTR (high-confidence)
ma2024imeta	contig006956	vOTU002885	36856	No	1	100	0	DTR (high-confidence)
ma2024imeta	contig006962	vOTU002891	52971	No	2	100	0	AAI-based (high-confidence)
ma2024imeta	contig006998	vOTU002917	44823	No	2	100	0	AAI-based (medium-confidence)
ma2024imeta	contig007010	vOTU002924	32423	No	1	100	0	DTR (high-confidence)
ma2024imeta	contig007016	vOTU002927	44392	No	1	100	0	DTR (high-confidence)
ma2024imeta	contig007023	vOTU002932	43688	No	1	100	0	DTR (high-confidence)
ma2024imeta	contig007051	vOTU002948	77245	No	1	100	0	DTR (high-confidence)
ma2024imeta	contig007098	vOTU062387	63232	No	2	100	0	AAI-based (medium-confidence)
ma2024imeta	contig007115	vOTU002976	277491	No	1	100	0	DTR (high-confidence)
ma2024imeta	contig007124	vOTU002982	97809	No	2	100	0	AAI-based (medium-confidence)
ma2024imeta	contig007145	vOTU002996	39035	No	1	100	0	DTR (high-confidence)
ma2024imeta	contig007163	vOTU003006	7462	No	2	100	0	AAI-based (medium-confidence)
ma2024imeta	contig007189	vOTU003020	65681	No	1	100	0	DTR (high-confidence)
ma2024imeta	contig007192	vOTU003023	33280	No	1	100	0	DTR (medium-confidence)
ma2024imeta	contig007193	vOTU003024	30727	No	1	100	0	DTR (high-confidence)
ma2024imeta	contig007197	vOTU003028	43383	No	1	100	0	DTR (high-confidence)
ma2024imeta	contig007200	vOTU003030	19778	No	1	100	0	DTR (medium-confidence)
ma2024imeta	contig007201	vOTU003031	5455	No	1	100	0	DTR (high-confidence)
ma2024imeta	contig007204	vOTU003033	5751	No	1	100	0	DTR (high-confidence)
ma2024imeta	contig007284	vOTU117100	39996	No	1	100	0	DTR (high-confidence)
ma2024imeta	contig007306	vOTU019478	57503	No	2	100	0	AAI-based (high-confidence)
ma2024imeta	contig007310	vOTU003096	43042	No	1	100	0	DTR (high-confidence)
ma2024imeta	contig007316	vOTU003101	33742	No	1	100	0	DTR (high-confidence)
ma2024imeta	contig007322	vOTU003106	48236	No	2	100	0	AAI-based (medium-confidence)
ma2024imeta	contig007328	vOTU003110	33945	No	1	100	0	DTR (high-confidence)
ma2024imeta	contig007352	vOTU003128	62143	No	2	100	0	AAI-based (medium-confidence)
ma2024imeta	contig007416	vOTU003168	63591	No	1	100	0	DTR (high-confidence)
ma2024imeta	contig007418	vOTU094538	50758	No	1	100	0	DTR (high-confidence)
ma2024imeta	contig007419	vOTU003170	37618	No	1	100	0	DTR (high-confidence)
ma2024imeta	contig007421	vOTU003172	41199	No	1	100	0	DTR (high-confidence)
ma2024imeta	contig007422	vOTU003173	5437	No	1	100	0	DTR (high-confidence)
ma2024imeta	contig007425	vOTU003176	36724	No	1	100	0	DTR (medium-confidence)
ma2024imeta	contig007430	vOTU003180	34929	No	1	100	0	DTR (high-confidence)
ma2024imeta	contig007497	vOTU003223	35924	No	1	100	0	DTR (medium-confidence)
ma2024imeta	contig007531	vOTU003244	35852	No	1	100	0	DTR (medium-confidence)
ma2024imeta	contig007576	vOTU003267	35698	No	2	100	0	AAI-based (high-confidence)
ma2024imeta	contig007580	vOTU003269	46875	No	1	100	0	DTR (high-confidence)
ma2024imeta	contig007597	vOTU003278	101768	No	1	100	0	DTR (high-confidence)
ma2024imeta	contig007598	vOTU003279	40424	No	1	100	0	DTR (high-confidence)
ma2024imeta	contig007601	vOTU003282	47718	No	1	100	0	DTR (high-confidence)
ma2024imeta	contig007606	vOTU003284	57485	No	1	100	0	DTR (high-confidence)
ma2024imeta	contig007610	vOTU003286	64043	No	1	100	0	DTR (high-confidence)
ma2024imeta	contig007611	vOTU003287	43553	No	1	100	0	DTR (high-confidence)
ma2024imeta	contig007642	vOTU003309	39160	No	2	100	0	AAI-based (medium-confidence)
ma2024imeta	contig007879	vOTU009085	100526	No	2	100	0	AAI-based (high-confidence)
ma2024imeta	contig007940	vOTU003453	33872	No	1	100	0	DTR (high-confidence)
ma2024imeta	contig007953	vOTU048358	22411	No	1	100	0	DTR (high-confidence)
ma2024imeta	contig007963	vOTU010881	119280	No	2	100	0	AAI-based (high-confidence)
ma2024imeta	contig007969	vOTU003462	67308	No	2	100	0	AAI-based (high-confidence)
ma2024imeta	contig007978	vOTU003466	70353	No	2	100	0	AAI-based (medium-confidence)
ma2024imeta	contig008014	vOTU003475	13610	No	2	100	0	AAI-based (high-confidence)
ma2024imeta	contig008110	vOTU003502	45039	No	1	100	0	DTR (high-confidence)
ma2024imeta	contig008112	vOTU114224	42673	No	1	100	0	DTR (high-confidence)
ma2024imeta	contig008130	vOTU028576	36331	No	2	100	0	AAI-based (medium-confidence)
ma2024imeta	contig008313	vOTU003537	263506	No	2	100	0	AAI-based (medium-confidence)
ma2024imeta	contig008413	vOTU003567	33869	No	2	100	0	AAI-based (medium-confidence)
ma2024imeta	contig008433	vOTU003574	46286	No	1	100	0	DTR (high-confidence)
ma2024imeta	contig008483	vOTU003592	32880	No	1	100	0	DTR (medium-confidence)
ma2024imeta	contig008494	vOTU003595	35103	No	1	100	0	DTR (high-confidence)
ma2024imeta	contig008566	vOTU010837	7017	No	2	100	0	AAI-based (high-confidence)
ma2024imeta	contig008569	vOTU003606	45061	No	1	100	0	DTR (high-confidence)
ma2024imeta	contig008655	vOTU003622	40328	No	1	100	0	DTR (medium-confidence)
ma2024imeta	contig008659	vOTU061406	42288	No	2	100	0	AAI-based (high-confidence)
ma2024imeta	contig008726	vOTU003630	36215	No	2	100	0	AAI-based (high-confidence)
ma2024imeta	contig008748	vOTU003634	56242	No	1	100	0	DTR (high-confidence)
ma2024imeta	contig008773	vOTU003640	39162	No	1	100	0	DTR (medium-confidence)
ma2024imeta	contig008861	vOTU003888	41166	No	1	100	0	DTR (high-confidence)
ma2024imeta	contig008945	vOTU003723	37049	No	1	100	0	DTR (medium-confidence)
ma2024imeta	contig008976	vOTU003737	5812	No	2	100	0	AAI-based (medium-confidence)
ma2024imeta	contig009058	vOTU003780	30378	No	2	100	0	AAI-based (medium-confidence)
ma2024imeta	contig009137	vOTU003824	72748	No	1	100	0	DTR (high-confidence)
ma2024imeta	contig009269	vOTU003891	43230	No	1	100	0	DTR (high-confidence)
ma2024imeta	contig009441	vOTU003981	100496	No	1	100	0	DTR (high-confidence)
ma2024imeta	contig009577	vOTU004062	54730	No	1	100	0	DTR (high-confidence)
ma2024imeta	contig009595	vOTU131900	44261	No	2	100	0	AAI-based (high-confidence)
ma2024imeta	contig009732	vOTU004158	40384	No	2	100	0	AAI-based (medium-confidence)
ma2024imeta	contig009749	vOTU004170	35290	No	2	100	0	AAI-based (high-confidence)
ma2024imeta	contig009788	vOTU004193	46455	No	2	100	0	AAI-based (high-confidence)
ma2024imeta	contig009802	vOTU004204	48869	No	1	100	0	DTR (high-confidence)
ma2024imeta	contig009811	vOTU004208	43779	No	1	100	0	DTR (high-confidence)
ma2024imeta	contig009914	vOTU004270	35938	No	1	100	0	DTR (high-confidence)
ma2024imeta	contig009918	vOTU013104	43531	No	1	100	0	DTR (high-confidence)
ma2024imeta	contig009919	vOTU004274	34167	No	1	100	0	DTR (high-confidence)
ma2024imeta	contig009922	vOTU004277	42842	No	1	100	0	DTR (high-confidence)
ma2024imeta	contig009930	vOTU004283	32435	No	1	100	0	DTR (high-confidence)
ma2024imeta	contig009934	vOTU004285	23204	No	1	100	0	DTR (high-confidence)
ma2024imeta	contig009942	vOTU004290	5303	No	1	100	0	DTR (high-confidence)
ma2024imeta	contig009998	vOTU004326	5459	No	2	100	0	AAI-based (high-confidence)
ma2024imeta	contig010095	vOTU004383	60604	No	1	100	0	DTR (high-confidence)
ma2024imeta	contig010114	vOTU063232	51117	No	1	100	0	DTR (high-confidence)
ma2024imeta	contig010132	vOTU004403	38048	No	2	100	0	AAI-based (high-confidence)
ma2024imeta	contig010311	vOTU004497	35793	No	2	100	0	AAI-based (high-confidence)
ma2024imeta	contig010323	vOTU004502	41088	No	1	100	0	DTR (high-confidence)
ma2024imeta	contig010401	vOTU004550	62318	No	2	100	0	AAI-based (high-confidence)
ma2024imeta	contig010489	vOTU004607	13964	No	2	100	0	AAI-based (high-confidence)
ma2024imeta	contig010506	vOTU004616	41009	No	1	100	0	DTR (high-confidence)
ma2024imeta	contig010624	vOTU004668	33402	No	2	100	0	AAI-based (high-confidence)
ma2024imeta	contig010821	vOTU004773	50293	No	1	100	0	DTR (high-confidence)
ma2024imeta	contig010836	vOTU004782	47083	No	2	100	0	AAI-based (medium-confidence)
ma2024imeta	contig010853	vOTU004791	40730	No	1	100	0	DTR (high-confidence)
ma2024imeta	contig010931	vOTU004834	51686	No	2	100	0	AAI-based (medium-confidence)
ma2024imeta	contig010986	vOTU004862	41075	No	1	100	0	DTR (high-confidence)
ma2024imeta	contig010990	vOTU004865	55768	No	1	100	0	DTR (high-confidence)
ma2024imeta	contig010991	vOTU004980	48185	No	1	100	0	DTR (high-confidence)
ma2024imeta	contig010993	vOTU004866	36903	No	1	100	0	DTR (high-confidence)
ma2024imeta	contig010995	vOTU004867	40714	No	1	100	0	DTR (high-confidence)
ma2024imeta	contig010996	vOTU004868	6454	No	1	100	0	DTR (high-confidence)
ma2024imeta	contig011021	vOTU004882	37630	No	2	100	0	AAI-based (high-confidence)
ma2024imeta	contig011040	vOTU004897	34271	No	2	100	0	AAI-based (high-confidence)
ma2024imeta	contig011055	vOTU004908	41312	No	1	100	0	DTR (medium-confidence)
ma2024imeta	contig011077	vOTU004923	39098	No	1	100	0	DTR (high-confidence)
ma2024imeta	contig011117	vOTU004940	47138	No	2	100	0	AAI-based (high-confidence)
ma2024imeta	contig011393	vOTU124733	48575	No	1	100	0	DTR (high-confidence)
ma2024imeta	contig011512	vOTU005129	33205	No	1	100	0	DTR (medium-confidence)
ma2024imeta	contig011529	vOTU005141	54495	No	1	100	0	DTR (high-confidence)
ma2024imeta	contig011546	vOTU005155	62182	No	2	100	0	AAI-based (medium-confidence)
ma2024imeta	contig011569	vOTU005174	36608	No	2	100	0	AAI-based (high-confidence)
ma2024imeta	contig011587	vOTU005188	45822	No	2	100	0	AAI-based (high-confidence)
ma2024imeta	contig011606	vOTU005201	43487	No	1	100	0	DTR (high-confidence)
ma2024imeta	contig011624	vOTU005210	42139	No	2	100	0	AAI-based (high-confidence)
ma2024imeta	contig011625	vOTU005211	34549	No	1	100	0	DTR (high-confidence)
ma2024imeta	contig011632	vOTU005217	49669	No	2	100	0	AAI-based (medium-confidence)
ma2024imeta	contig011694	vOTU005259	42605	No	1	100	0	DTR (high-confidence)
ma2024imeta	contig011695	vOTU005260	36240	No	1	100	0	DTR (high-confidence)
ma2024imeta	contig011697	vOTU005261	44214	No	1	100	0	DTR (high-confidence)
ma2024imeta	contig011699	vOTU005263	42238	No	1	100	0	DTR (high-confidence)
ma2024imeta	contig011705	vOTU005268	5433	No	1	100	0	DTR (high-confidence)
ma2024imeta	contig011717	vOTU005275	33587	No	1	100	0	DTR (medium-confidence)
ma2024imeta	contig011792	vOTU005320	38581	No	1	100	0	DTR (high-confidence)
ma2024imeta	contig011881	vOTU005371	35533	No	1	100	0	DTR (high-confidence)
ma2024imeta	contig011892	vOTU005380	35071	No	1	100	0	DTR (medium-confidence)
ma2024imeta	contig011989	vOTU007770	51364	No	2	100	0	AAI-based (high-confidence)
ma2024imeta	contig012122	vOTU005487	42710	No	1	100	0	DTR (high-confidence)
ma2024imeta	contig012132	vOTU005493	46553	No	2	100	0	AAI-based (medium-confidence)
ma2024imeta	contig012292	vOTU005574	64681	No	1	100	0	DTR (high-confidence)
ma2024imeta	contig012353	vOTU005608	233136	No	1	100	0	DTR (high-confidence)
ma2024imeta	contig012408	vOTU005642	82313	No	1	100	0	DTR (high-confidence)
ma2024imeta	contig012497	vOTU005686	46009	No	1	100	0	DTR (high-confidence)
ma2024imeta	contig012551	vOTU005716	73570	No	1	100	0	DTR (high-confidence)
ma2024imeta	contig012561	vOTU005725	63381	No	2	100	0	AAI-based (medium-confidence)
ma2024imeta	contig012592	vOTU005740	53766	No	1	100	0	DTR (medium-confidence)
ma2024imeta	contig012613	vOTU005745	31342	No	1	100	0	DTR (medium-confidence)
ma2024imeta	contig012648	vOTU005763	13083	No	2	100	0	AAI-based (medium-confidence)
ma2024imeta	contig012655	vOTU005768	41688	No	1	100	0	DTR (high-confidence)
ma2024imeta	contig012691	vOTU005792	102220	No	2	100	0	AAI-based (high-confidence)
ma2024imeta	contig012693	vOTU005793	42225	No	2	100	0	AAI-based (medium-confidence)
ma2024imeta	contig012747	vOTU006806	42552	No	1	100	0	DTR (high-confidence)
ma2024imeta	contig012764	vOTU005834	14652	No	2	100	0	AAI-based (medium-confidence)
ma2024imeta	contig012933	vOTU005944	41210	No	2	100	0	AAI-based (high-confidence)
ma2024imeta	contig012949	vOTU005957	62255	No	2	100	0	AAI-based (high-confidence)
ma2024imeta	contig012955	vOTU005963	41099	No	1	100	0	DTR (high-confidence)
ma2024imeta	contig012957	vOTU005965	56877	No	1	100	0	DTR (high-confidence)
ma2024imeta	contig012960	vOTU005966	52743	No	2	100	0	AAI-based (medium-confidence)
ma2024imeta	contig012961	vOTU005967	56665	No	1	100	0	DTR (medium-confidence)
ma2024imeta	contig012963	vOTU005968	19265	No	1	100	0	DTR (medium-confidence)
ma2024imeta	contig012966	vOTU005970	34921	No	1	100	0	DTR (high-confidence)
ma2024imeta	contig012967	vOTU005971	35023	No	1	100	0	DTR (high-confidence)
ma2024imeta	contig013034	vOTU006008	41651	No	1	100	0	DTR (high-confidence)
ma2024imeta	contig013088	vOTU006042	35755	No	2	100	0	AAI-based (medium-confidence)
ma2024imeta	contig013157	vOTU006076	36053	No	2	100	0	AAI-based (high-confidence)
ma2024imeta	contig013208	vOTU006103	60184	No	2	100	0	AAI-based (high-confidence)
ma2024imeta	contig013254	vOTU006130	63652	No	2	100	0	AAI-based (high-confidence)
ma2024imeta	contig013283	vOTU006149	40987	No	1	100	0	DTR (high-confidence)
ma2024imeta	contig013331	vOTU006182	37362	No	1	100	0	DTR (high-confidence)
ma2024imeta	contig013400	vOTU006219	61073	No	2	100	0	AAI-based (high-confidence)
ma2024imeta	contig013405	vOTU006221	249392	No	2	100	0	AAI-based (medium-confidence)
ma2024imeta	contig013458	vOTU006248	41315	No	1	100	0	DTR (high-confidence)
ma2024imeta	contig013640	vOTU017468	53592	No	1	100	0	DTR (high-confidence)
ma2024imeta	contig013683	vOTU006393	30308	No	1	100	0	DTR (high-confidence)
ma2024imeta	contig013733	vOTU006426	21590	No	1	100	0	DTR (high-confidence)
ma2024imeta	contig013740	vOTU006430	38528	No	1	100	0	DTR (high-confidence)
ma2024imeta	contig013745	vOTU006433	52081	No	1	100	0	DTR (high-confidence)
ma2024imeta	contig013863	vOTU006491	40878	No	1	100	0	DTR (high-confidence)
ma2024imeta	contig013864	vOTU006492	5533	No	1	100	0	DTR (high-confidence)
ma2024imeta	contig013918	vOTU006523	13431	No	2	100	0	AAI-based (medium-confidence)
ma2024imeta	contig014030	vOTU006592	42104	No	1	100	0	DTR (high-confidence)
ma2024imeta	contig014035	vOTU006595	47700	No	1	100	0	DTR (high-confidence)
ma2024imeta	contig014048	vOTU006603	32921	No	1	100	0	DTR (high-confidence)
ma2024imeta	contig014188	vOTU006673	62221	No	2	100	0	AAI-based (medium-confidence)
ma2024imeta	contig014193	vOTU006676	72418	No	1	100	0	DTR (high-confidence)
ma2024imeta	contig014194	vOTU006677	43538	No	1	100	0	DTR (high-confidence)
ma2024imeta	contig014197	vOTU002627	13821	No	1	100	0	DTR (high-confidence)
ma2024imeta	contig014253	vOTU006706	14669	No	2	100	0	AAI-based (medium-confidence)
ma2024imeta	contig014417	vOTU006785	139982	No	1	100	0	DTR (high-confidence)
ma2024imeta	contig014424	vOTU006791	41887	No	1	100	0	DTR (high-confidence)
ma2024imeta	contig014448	vOTU006803	32875	No	1	100	0	DTR (high-confidence)
ma2024imeta	contig014454	vOTU006807	6568	No	1	100	0	DTR (high-confidence)
ma2024imeta	contig014455	vOTU006808	5326	No	1	100	0	DTR (high-confidence)
ma2024imeta	contig014760	vOTU006947	57866	No	2	100	0	AAI-based (high-confidence)
ma2024imeta	contig014776	vOTU006957	58255	No	1	100	0	DTR (high-confidence)
ma2024imeta	contig014817	vOTU006977	11845	No	1	100	0	ITR (high-confidence)
ma2024imeta	contig014838	vOTU006988	35469	No	1	100	0	DTR (high-confidence)
ma2024imeta	contig014847	vOTU006993	40434	No	2	100	0	AAI-based (medium-confidence)
ma2024imeta	contig014873	vOTU063938	46504	No	2	100	0	AAI-based (medium-confidence)
ma2024imeta	contig014890	vOTU007022	57930	No	1	100	0	DTR (high-confidence)
ma2024imeta	contig014918	vOTU007038	65562	No	2	100	0	AAI-based (medium-confidence)
ma2024imeta	contig014996	vOTU018184	6230	No	2	100	0	AAI-based (high-confidence)
ma2024imeta	contig015042	vOTU007099	46983	No	2	100	0	AAI-based (high-confidence)
ma2024imeta	contig015071	vOTU007121	38002	No	2	100	0	AAI-based (high-confidence)
ma2024imeta	contig015097	vOTU007137	51601	No	1	100	0	DTR (high-confidence)
ma2024imeta	contig015098	vOTU007138	6580	No	1	100	0	DTR (high-confidence)
ma2024imeta	contig015100	vOTU007140	63617	No	1	100	0	DTR (high-confidence)
ma2024imeta	contig015110	vOTU124776	33375	No	1	100	0	DTR (high-confidence)
ma2024imeta	contig015111	vOTU007148	23118	No	1	100	0	DTR (high-confidence)
ma2024imeta	contig015115	vOTU007151	55961	No	1	100	0	DTR (medium-confidence)
ma2024imeta	contig015129	vOTU007159	66525	No	1	100	0	DTR (high-confidence)
ma2024imeta	contig015136	vOTU007163	37667	No	1	100	0	DTR (high-confidence)
ma2024imeta	contig015146	vOTU007169	271424	No	2	100	0	AAI-based (medium-confidence)
ma2024imeta	contig015231	vOTU007225	40381	No	1	100	0	DTR (high-confidence)
ma2024imeta	contig015243	vOTU007231	41717	No	2	100	0	AAI-based (medium-confidence)
ma2024imeta	contig015265	vOTU007249	61416	No	2	100	0	AAI-based (medium-confidence)
ma2024imeta	contig015267	vOTU007250	54260	No	1	100	0	DTR (high-confidence)
ma2024imeta	contig015276	vOTU007257	264925	No	1	100	0	DTR (high-confidence)
ma2024imeta	contig015409	vOTU007342	47162	No	1	100	0	DTR (high-confidence)
ma2024imeta	contig015416	vOTU007349	72827	No	1	100	0	DTR (high-confidence)
ma2024imeta	contig015472	vOTU007384	47867	No	1	100	0	DTR (high-confidence)
ma2024imeta	contig015505	vOTU007404	47897	No	1	100	0	DTR (high-confidence)
ma2024imeta	contig015531	vOTU007422	10782	No	2	100	0	AAI-based (high-confidence)
ma2024imeta	contig015613	vOTU007478	35400	No	1	100	0	DTR (high-confidence)
ma2024imeta	contig015627	vOTU007488	6982	No	2	100	0	AAI-based (high-confidence)
ma2024imeta	contig015638	vOTU007492	58338	No	1	100	0	DTR (high-confidence)
ma2024imeta	contig015671	vOTU007513	75957	No	1	100	0	DTR (high-confidence)
ma2024imeta	contig015672	vOTU007514	46594	No	2	100	0	AAI-based (medium-confidence)
ma2024imeta	contig015678	vOTU007518	36735	No	2	100	0	AAI-based (medium-confidence)
ma2024imeta	contig015690	vOTU007523	24225	No	1	100	0	DTR (high-confidence)
ma2024imeta	contig015707	vOTU007535	48855	No	2	100	0	AAI-based (medium-confidence)
ma2024imeta	contig015737	vOTU007552	127686	No	1	100	0	DTR (high-confidence)
ma2024imeta	contig015743	vOTU007555	58006	No	1	100	0	DTR (high-confidence)
ma2024imeta	contig015841	vOTU007626	34671	No	2	100	0	AAI-based (high-confidence)
ma2024imeta	contig015854	vOTU009903	45677	No	1	100	0	DTR (high-confidence)
ma2024imeta	contig015860	vOTU007639	35966	No	2	100	0	AAI-based (high-confidence)
ma2024imeta	contig015861	vOTU007640	39692	No	1	100	0	DTR (high-confidence)
ma2024imeta	contig015866	vOTU007645	39579	No	1	100	0	DTR (medium-confidence)
ma2024imeta	contig015867	vOTU007646	34296	No	1	100	0	DTR (medium-confidence)
ma2024imeta	contig015872	vOTU007650	73855	No	1	100	0	DTR (high-confidence)
ma2024imeta	contig015876	vOTU007652	62377	No	1	100	0	DTR (high-confidence)
ma2024imeta	contig015879	vOTU007655	62034	No	1	100	0	DTR (high-confidence)
ma2024imeta	contig015881	vOTU007656	6099	No	1	100	0	DTR (high-confidence)
ma2024imeta	contig015883	vOTU007658	25023	No	1	100	0	DTR (high-confidence)
ma2024imeta	contig015885	vOTU007659	39696	No	1	100	0	DTR (high-confidence)
ma2024imeta	contig015887	vOTU007661	37741	No	1	100	0	DTR (high-confidence)
ma2024imeta	contig015891	vOTU007663	33118	No	1	100	0	DTR (high-confidence)
ma2024imeta	contig015893	vOTU007664	44177	No	1	100	0	DTR (high-confidence)
ma2024imeta	contig015894	vOTU007665	44838	No	1	100	0	DTR (high-confidence)
ma2024imeta	contig015900	vOTU007670	5757	No	1	100	0	DTR (high-confidence)
ma2024imeta	contig015920	vOTU007685	35059	No	2	100	0	AAI-based (medium-confidence)
ma2024imeta	contig015933	vOTU007692	65347	No	1	100	0	DTR (high-confidence)
ma2024imeta	contig015936	vOTU007694	47664	No	1	100	0	DTR (high-confidence)
ma2024imeta	contig016062	vOTU116905	46730	No	2	100	0	AAI-based (medium-confidence)
ma2024imeta	contig016066	vOTU007780	45887	No	2	100	0	AAI-based (medium-confidence)
ma2024imeta	contig016199	vOTU007852	33910	No	1	100	0	DTR (high-confidence)
ma2024imeta	contig016228	vOTU007864	6157	No	2	100	0	AAI-based (medium-confidence)
ma2024imeta	contig016315	vOTU007915	36079	No	1	100	0	DTR (high-confidence)
ma2024imeta	contig016343	vOTU007931	98625	No	1	100	0	DTR (high-confidence)
ma2024imeta	contig016390	vOTU007957	63886	No	1	100	0	DTR (high-confidence)
ma2024imeta	contig016392	vOTU007958	48099	No	1	100	0	DTR (high-confidence)
ma2024imeta	contig016395	vOTU007960	64344	No	1	100	0	DTR (high-confidence)
ma2024imeta	contig016405	vOTU106481	43499	No	1	100	0	DTR (high-confidence)
ma2024imeta	contig016412	vOTU007971	43344	No	1	100	0	DTR (high-confidence)
ma2024imeta	contig016413	vOTU007972	13157	No	1	100	0	DTR (high-confidence)
ma2024imeta	contig016532	vOTU008048	25814	No	1	100	0	DTR (high-confidence)
ma2024imeta	contig016735	vOTU008159	69705	No	1	100	0	DTR (medium-confidence)
ma2024imeta	contig016754	vOTU008169	65218	No	2	100	0	AAI-based (medium-confidence)
ma2024imeta	contig016845	vOTU008224	39695	No	1	100	0	DTR (high-confidence)
ma2024imeta	contig016847	vOTU008226	55802	No	1	100	0	DTR (high-confidence)
ma2024imeta	contig016848	vOTU008227	34915	No	1	100	0	DTR (high-confidence)
ma2024imeta	contig016849	vOTU008228	43827	No	1	100	0	DTR (high-confidence)
ma2024imeta	contig016850	vOTU008229	25986	No	1	100	0	DTR (high-confidence)
ma2024imeta	contig016852	vOTU008231	29891	No	1	100	0	DTR (high-confidence)
ma2024imeta	contig016853	vOTU008232	15171	No	1	100	0	DTR (medium-confidence)
ma2024imeta	contig016856	vOTU008233	5249	No	1	100	0	DTR (high-confidence)
ma2024imeta	contig016924	vOTU008280	52988	No	1	100	0	DTR (medium-confidence)
ma2024imeta	contig016996	vOTU008317	40938	No	1	100	0	DTR (high-confidence)
ma2024imeta	contig017070	vOTU008345	116186	No	1	100	0	ITR (medium-confidence)
ma2024imeta	contig017078	vOTU016786	64495	No	1	100	0	DTR (high-confidence)
ma2024imeta	contig017079	vOTU008350	39343	No	1	100	0	DTR (high-confidence)
ma2024imeta	contig017117	vOTU008372	13736	No	2	100	0	AAI-based (medium-confidence)
ma2024imeta	contig017134	vOTU008381	13450	No	2	100	0	AAI-based (medium-confidence)
ma2024imeta	contig017192	vOTU059900	45603	No	1	100	0	DTR (high-confidence)
ma2024imeta	contig017200	vOTU010969	35667	No	2	100	0	AAI-based (high-confidence)
ma2024imeta	contig017262	vOTU014015	125392	No	1	100	0	DTR (high-confidence)
ma2024imeta	contig017266	vOTU008491	142653	No	1	100	0	DTR (high-confidence)
ma2024imeta	contig017267	vOTU064265	45865	No	1	100	0	DTR (high-confidence)
ma2024imeta	contig017362	vOTU008443	38122	No	1	100	0	DTR (high-confidence)
ma2024imeta	contig017523	vOTU008493	51931	No	1	100	0	DTR (high-confidence)
ma2024imeta	contig017527	vOTU008495	99792	No	1	100	0	DTR (high-confidence)
ma2024imeta	contig017530	vOTU046839	32473	No	1	100	0	DTR (high-confidence)
ma2024imeta	contig017532	vOTU009907	48413	No	1	100	0	DTR (high-confidence)
ma2024imeta	contig017580	vOTU008513	29298	No	2	100	0	AAI-based (high-confidence)
ma2024imeta	contig017758	vOTU008566	200211	No	2	100	0	AAI-based (medium-confidence)
ma2024imeta	contig017843	vOTU057579	14279	No	1	100	0	DTR (high-confidence)
ma2024imeta	contig017849	vOTU008588	82293	No	2	100	0	AAI-based (high-confidence)
ma2024imeta	contig017857	vOTU008591	162402	No	1	100	0	DTR (high-confidence)
ma2024imeta	contig017863	vOTU008593	98345	No	1	100	0	DTR (high-confidence)
ma2024imeta	contig017864	vOTU008594	38010	No	1	100	0	DTR (high-confidence)
ma2024imeta	contig017869	vOTU008596	60405	No	1	100	0	DTR (high-confidence)
ma2024imeta	contig017899	vOTU008694	102466	No	2	100	0	AAI-based (high-confidence)
ma2024imeta	contig017973	vOTU008625	76249	No	1	100	0	DTR (medium-confidence)
ma2024imeta	contig018002	vOTU008630	187942	No	2	100	0	AAI-based (high-confidence)
ma2024imeta	contig018005	vOTU008632	44438	No	1	100	0	DTR (high-confidence)
ma2024imeta	contig018045	vOTU008644	36227	No	2	100	0	AAI-based (high-confidence)
ma2024imeta	contig018124	vOTU008664	45524	No	2	100	0	AAI-based (medium-confidence)
ma2024imeta	contig018132	vOTU008667	37288	No	2	100	0	AAI-based (medium-confidence)
ma2024imeta	contig018161	vOTU008673	89824	No	1	100	0	DTR (high-confidence)
ma2024imeta	contig018163	vOTU008674	34302	No	1	100	0	DTR (medium-confidence)
ma2024imeta	contig018164	vOTU008675	49179	No	1	100	0	DTR (high-confidence)
ma2024imeta	contig018230	vOTU008699	43319	No	2	100	0	AAI-based (high-confidence)
ma2024imeta	contig018285	vOTU008708	35144	No	1	100	0	DTR (high-confidence)
ma2024imeta	contig018395	vOTU061613	41156	No	1	100	0	DTR (high-confidence)
ma2024imeta	contig018416	vOTU008727	45295	No	2	100	0	AAI-based (high-confidence)
ma2024imeta	contig018534	vOTU008744	37283	No	1	100	0	DTR (high-confidence)
ma2024imeta	contig018617	vOTU008763	54416	No	1	100	0	DTR (medium-confidence)
ma2024imeta	contig018726	vOTU008903	46374	No	2	100	0	AAI-based (high-confidence)
ma2024imeta	contig018861	vOTU008819	61062	Yes	1	100	3.34	DTR (high-confidence)
ma2024imeta	contig018872	vOTU008821	41284	No	1	100	0	DTR (high-confidence)
ma2024imeta	contig018927	vOTU008833	64129	No	2	100	0	AAI-based (medium-confidence)
ma2024imeta	contig019054	vOTU008863	60152	No	1	100	0	DTR (high-confidence)
ma2024imeta	contig019056	vOTU008864	42906	No	1	100	0	DTR (high-confidence)
ma2024imeta	contig019132	vOTU008881	70133	No	2	100	0	AAI-based (high-confidence)
ma2024imeta	contig019191	vOTU061662	79617	No	2	100	0	AAI-based (high-confidence)
ma2024imeta	contig019221	vOTU008940	50120	No	2	100	0	AAI-based (high-confidence)
ma2024imeta	contig019370	vOTU008943	45329	No	2	100	0	AAI-based (medium-confidence)
ma2024imeta	contig019501	vOTU008986	34767	No	1	100	0	DTR (high-confidence)
ma2024imeta	contig019514	vOTU008989	110719	No	1	100	0	DTR (high-confidence)
ma2024imeta	contig019515	vOTU008990	47895	No	1	100	0	DTR (high-confidence)
ma2024imeta	contig019519	vOTU008993	39524	No	1	100	0	DTR (high-confidence)
ma2024imeta	contig019521	vOTU008994	49885	No	1	100	0	DTR (high-confidence)
ma2024imeta	contig019526	vOTU008996	37531	No	1	100	0	DTR (high-confidence)
ma2024imeta	contig019528	vOTU009609	58891	No	1	100	0	DTR (high-confidence)
ma2024imeta	contig019529	vOTU061716	35574	No	2	100	0	AAI-based (high-confidence)
ma2024imeta	contig019563	vOTU009001	110722	No	1	100	0	DTR (high-confidence)
ma2024imeta	contig019700	vOTU009020	108391	No	1	100	0	DTR (high-confidence)
ma2024imeta	contig019769	vOTU009038	31622	No	2	100	0	AAI-based (high-confidence)
ma2024imeta	contig019821	vOTU009053	68302	No	2	100	0	AAI-based (medium-confidence)
ma2024imeta	contig019851	vOTU009214	88063	No	1	100	0	DTR (high-confidence)
ma2024imeta	contig019856	vOTU009060	88877	No	2	100	0	AAI-based (medium-confidence)
ma2024imeta	contig019871	vOTU009850	187423	No	1	100	0	DTR (high-confidence)
ma2024imeta	contig019874	vOTU009219	38172	No	1	100	0	DTR (high-confidence)
ma2024imeta	contig019875	vOTU009063	37198	No	1	100	0	DTR (high-confidence)
ma2024imeta	contig019880	vOTU097939	43673	No	1	100	0	DTR (high-confidence)
ma2024imeta	contig019887	vOTU061897	45160	No	1	100	0	DTR (high-confidence)
ma2024imeta	contig019923	vOTU063184	47831	No	1	100	0	DTR (high-confidence)
ma2024imeta	contig019947	vOTU009073	39349	No	1	100	0	DTR (high-confidence)
ma2024imeta	contig019952	vOTU009075	104675	No	2	100	0	AAI-based (high-confidence)
ma2024imeta	contig019979	vOTU132522	46881	No	1	100	0	DTR (high-confidence)
ma2024imeta	contig019996	vOTU009087	36951	No	1	100	0	DTR (high-confidence)
ma2024imeta	contig019999	vOTU138667	35767	No	1	100	0	DTR (high-confidence)
ma2024imeta	contig020001	vOTU010235	33043	No	1	100	0	DTR (high-confidence)
ma2024imeta	contig020003	vOTU009088	51016	No	1	100	0	DTR (high-confidence)
ma2024imeta	contig020035	vOTU009092	261923	No	2	100	0	AAI-based (medium-confidence)
ma2024imeta	contig020037	vOTU010413	60853	No	1	100	0	DTR (high-confidence)
ma2024imeta	contig020126	vOTU009429	59118	No	1	100	0	DTR (high-confidence)
ma2024imeta	contig020128	vOTU009195	45946	No	1	100	0	DTR (high-confidence)
ma2024imeta	contig020130	vOTU009520	58066	No	1	100	0	DTR (high-confidence)
ma2024imeta	contig020133	vOTU009105	48613	No	2	100	0	AAI-based (high-confidence)
ma2024imeta	contig020142	vOTU030757	98700	No	1	100	0	DTR (high-confidence)
ma2024imeta	contig020144	vOTU009106	37981	No	1	100	0	DTR (high-confidence)
ma2024imeta	contig020217	vOTU009973	79728	No	1	100	0	DTR (high-confidence)
ma2024imeta	contig020243	vOTU009163	48336	No	1	100	0	DTR (high-confidence)
ma2024imeta	contig020250	vOTU009137	105785	No	1	100	0	DTR (high-confidence)
ma2024imeta	contig020251	vOTU009138	39208	No	1	100	0	DTR (high-confidence)
ma2024imeta	contig020253	vOTU009139	33805	No	1	100	0	DTR (medium-confidence)
ma2024imeta	contig020254	vOTU009140	65501	No	1	100	0	DTR (high-confidence)
ma2024imeta	contig020268	vOTU009143	44806	No	1	100	0	DTR (high-confidence)
ma2024imeta	contig020278	vOTU061887	42670	No	2	100	0	AAI-based (high-confidence)
ma2024imeta	contig020290	vOTU113214	121004	No	1	100	0	DTR (high-confidence)
ma2024imeta	contig020296	vOTU009147	39955	No	2	100	0	AAI-based (high-confidence)
ma2024imeta	contig020300	vOTU061764	56335	No	1	100	0	DTR (high-confidence)
ma2024imeta	contig020313	vOTU009154	62866	No	2	100	0	AAI-based (medium-confidence)
ma2024imeta	contig020458	vOTU059301	48713	No	1	100	0	DTR (high-confidence)
ma2024imeta	contig020558	vOTU010000	35613	No	1	100	0	DTR (high-confidence)
ma2024imeta	contig020670	vOTU009960	44669	No	1	100	0	DTR (high-confidence)
ma2024imeta	contig020810	vOTU009191	34933	No	1	100	0	DTR (high-confidence)
ma2024imeta	contig020976	vOTU058371	44685	No	1	100	0	DTR (high-confidence)
ma2024imeta	contig021005	vOTU009227	39490	No	2	100	0	AAI-based (high-confidence)
ma2024imeta	contig021082	vOTU098236	48957	No	1	100	0	DTR (high-confidence)
ma2024imeta	contig021114	vOTU009239	41399	No	1	100	0	DTR (high-confidence)
ma2024imeta	contig021115	vOTU009240	60654	No	1	100	0	DTR (high-confidence)
ma2024imeta	contig021119	vOTU009562	85451	No	1	100	0	DTR (high-confidence)
ma2024imeta	contig021124	vOTU052287	100983	No	1	100	0	DTR (high-confidence)
ma2024imeta	contig021166	vOTU010098	78129	No	1	100	0	DTR (high-confidence)
ma2024imeta	contig021185	vOTU009246	48328	No	2	100	0	AAI-based (high-confidence)
ma2024imeta	contig021575	vOTU009305	45118	No	1	100	0	DTR (high-confidence)
ma2024imeta	contig021578	vOTU009308	62254	No	1	100	0	DTR (high-confidence)
ma2024imeta	contig021579	vOTU009309	41394	No	1	100	0	DTR (high-confidence)
ma2024imeta	contig021819	vOTU009348	162953	No	1	100	0	DTR (high-confidence)
ma2024imeta	contig021820	vOTU010341	33877	No	1	100	0	DTR (high-confidence)
ma2024imeta	contig021823	vOTU009355	44896	No	1	100	0	DTR (high-confidence)
ma2024imeta	contig021850	vOTU009352	38205	No	2	100	0	AAI-based (high-confidence)
ma2024imeta	contig021909	vOTU061787	40121	No	2	100	0	AAI-based (high-confidence)
ma2024imeta	contig021984	vOTU010395	41276	No	2	100	0	AAI-based (high-confidence)
ma2024imeta	contig022214	vOTU009385	37714	No	1	100	0	DTR (high-confidence)
ma2024imeta	contig022335	vOTU061782	38633	No	2	100	0	AAI-based (medium-confidence)
ma2024imeta	contig022404	vOTU010087	101541	No	1	100	0	DTR (medium-confidence)
ma2024imeta	contig022405	vOTU009443	50703	No	1	100	0	DTR (high-confidence)
ma2024imeta	contig022581	vOTU009474	51609	No	2	100	0	AAI-based (high-confidence)
ma2024imeta	contig022659	vOTU009485	49054	No	1	100	0	DTR (high-confidence)
ma2024imeta	contig022891	vOTU009525	49479	No	2	100	0	AAI-based (high-confidence)
ma2024imeta	contig022946	vOTU061877	49073	No	2	100	0	AAI-based (medium-confidence)
ma2024imeta	contig023202	vOTU009563	49820	No	1	100	0	DTR (high-confidence)
ma2024imeta	contig023481	vOTU009586	71832	No	1	100	0	DTR (high-confidence)
ma2024imeta	contig023490	vOTU009629	36978	No	2	100	0	AAI-based (medium-confidence)
ma2024imeta	contig023644	vOTU009611	44986	No	2	100	0	AAI-based (high-confidence)
ma2024imeta	contig024057	vOTU009680	111794	No	1	100	0	DTR (high-confidence)
ma2024imeta	contig024141	vOTU009694	38546	No	1	100	0	DTR (high-confidence)
ma2024imeta	contig024194	vOTU009703	34062	No	1	100	0	DTR (high-confidence)
ma2024imeta	contig024198	vOTU009704	138730	No	1	100	0	DTR (high-confidence)
ma2024imeta	contig024377	vOTU009745	32242	No	1	100	0	DTR (high-confidence)
ma2024imeta	contig024536	vOTU009783	40057	No	2	100	0	AAI-based (medium-confidence)
ma2024imeta	contig024676	vOTU125990	240064	No	2	100	0	AAI-based (high-confidence)
ma2024imeta	contig024680	vOTU009813	193719	No	1	100	0	DTR (high-confidence)
ma2024imeta	contig024784	vOTU077911	49051	No	1	100	0	DTR (high-confidence)
ma2024imeta	contig024814	vOTU009851	39333	No	1	100	0	DTR (high-confidence)
ma2024imeta	contig024823	vOTU009853	37824	No	2	100	0	AAI-based (medium-confidence)
ma2024imeta	contig024902	vOTU009923	113717	No	2	100	0	AAI-based (medium-confidence)
ma2024imeta	contig024910	vOTU066779	49050	No	1	100	0	DTR (high-confidence)
ma2024imeta	contig025022	vOTU009887	43985	No	1	100	0	DTR (high-confidence)
ma2024imeta	contig025061	vOTU009956	34136	No	1	100	0	DTR (medium-confidence)
ma2024imeta	contig025112	vOTU009965	59652	No	1	100	0	DTR (high-confidence)
ma2024imeta	contig025524	vOTU009929	40839	No	1	100	0	DTR (high-confidence)
ma2024imeta	contig025657	vOTU010186	61199	No	1	100	0	DTR (high-confidence)
ma2024imeta	contig025661	vOTU083356	43009	No	1	100	0	DTR (high-confidence)
ma2024imeta	contig025674	vOTU009967	44461	No	1	100	0	DTR (high-confidence)
ma2024imeta	contig025687	vOTU009980	36675	No	1	100	0	DTR (high-confidence)
ma2024imeta	contig025709	vOTU010161	47484	No	2	100	0	AAI-based (high-confidence)
ma2024imeta	contig025763	vOTU009977	37900	No	2	100	0	AAI-based (high-confidence)
ma2024imeta	contig025973	vOTU029717	52709	No	1	100	0	DTR (high-confidence)
ma2024imeta	contig025985	vOTU058947	22410	No	1	100	0	DTR (high-confidence)
ma2024imeta	contig026110	vOTU010311	50820	No	2	100	0	AAI-based (high-confidence)
ma2024imeta	contig026182	vOTU010031	46074	No	2	100	0	AAI-based (medium-confidence)
ma2024imeta	contig026222	vOTU010281	45289	No	2	100	0	AAI-based (high-confidence)
ma2024imeta	contig026308	vOTU047135	44440	No	1	100	0	DTR (high-confidence)
ma2024imeta	contig026355	vOTU009351	34694	No	1	100	0	DTR (medium-confidence)
ma2024imeta	contig026364	vOTU010391	44362	No	2	100	0	AAI-based (high-confidence)
ma2024imeta	contig026443	vOTU010075	41089	No	1	100	0	DTR (high-confidence)
ma2024imeta	contig026449	vOTU010078	41286	No	2	100	0	AAI-based (high-confidence)
ma2024imeta	contig026467	vOTU010389	167881	No	2	100	0	AAI-based (high-confidence)
ma2024imeta	contig026496	vOTU010083	65597	No	1	100	0	DTR (high-confidence)
ma2024imeta	contig026533	vOTU010086	37990	No	1	100	0	DTR (high-confidence)
ma2024imeta	contig026539	vOTU010088	42396	No	1	100	0	DTR (high-confidence)
ma2024imeta	contig026545	vOTU010089	37464	No	1	100	0	DTR (high-confidence)
ma2024imeta	contig026563	vOTU136497	240580	Yes	1	100	3.74	ITR (high-confidence)
ma2024imeta	contig026583	vOTU010093	36960	No	2	100	0	AAI-based (medium-confidence)
ma2024imeta	contig026898	vOTU010137	33352	No	1	100	0	DTR (high-confidence)
ma2024imeta	contig026903	vOTU052015	50794	No	1	100	0	DTR (high-confidence)
ma2024imeta	contig026971	vOTU010470	136486	No	1	100	0	DTR (medium-confidence)
ma2024imeta	contig027176	vOTU010185	65314	No	1	100	0	DTR (high-confidence)
ma2024imeta	contig027187	vOTU010205	52543	No	1	100	0	DTR (high-confidence)
ma2024imeta	contig027225	vOTU064532	63035	No	1	100	0	DTR (high-confidence)
ma2024imeta	contig027742	vOTU010251	35942	No	1	100	0	DTR (high-confidence)
ma2024imeta	contig027820	vOTU010231	35711	No	2	100	0	AAI-based (high-confidence)
ma2024imeta	contig027852	vOTU010211	44442	No	1	100	0	DTR (high-confidence)
ma2024imeta	contig028911	vOTU010405	43395	No	2	100	0	AAI-based (medium-confidence)
ma2024imeta	contig029369	vOTU010471	37445	No	2	100	0	AAI-based (high-confidence)
ma2024imeta	contig029555	vOTU010487	44590	No	1	100	0	DTR (high-confidence)
ma2024imeta	contig029919	vOTU010626	59959	No	1	100	0	DTR (high-confidence)
ma2024imeta	contig029921	vOTU010512	36611	No	1	100	0	DTR (high-confidence)
ma2024imeta	contig029926	vOTU010651	49005	No	1	100	0	DTR (high-confidence)
ma2024imeta	contig029930	vOTU010516	39612	No	1	100	0	DTR (high-confidence)
ma2024imeta	contig029996	vOTU010532	42539	No	2	100	0	AAI-based (high-confidence)
ma2024imeta	contig030127	vOTU061831	39159	No	2	100	0	AAI-based (high-confidence)
ma2024imeta	contig030189	vOTU010586	55768	No	1	100	0	DTR (high-confidence)
ma2024imeta	contig030219	vOTU010598	45322	No	1	100	0	DTR (high-confidence)
ma2024imeta	contig030222	vOTU010599	72826	No	1	100	0	DTR (high-confidence)
ma2024imeta	contig030275	vOTU010613	39145	No	1	100	0	DTR (high-confidence)
ma2024imeta	contig030338	vOTU010631	40005	No	1	100	0	DTR (high-confidence)
ma2024imeta	contig030647	vOTU061992	56350	No	2	100	0	AAI-based (high-confidence)
ma2024imeta	contig030814	vOTU010733	5048	No	2	100	0	AAI-based (medium-confidence)
ma2024imeta	contig030969	vOTU010761	61070	No	1	100	0	DTR (medium-confidence)
ma2024imeta	contig030977	vOTU010765	65752	No	1	100	0	DTR (high-confidence)
ma2024imeta	contig030979	vOTU010766	43312	No	1	100	0	DTR (high-confidence)
ma2024imeta	contig031016	vOTU062020	47693	No	2	100	0	AAI-based (medium-confidence)
ma2024imeta	contig031050	vOTU010786	35730	No	2	100	0	AAI-based (high-confidence)
ma2024imeta	contig031247	vOTU010852	41872	No	2	100	0	AAI-based (high-confidence)
ma2024imeta	contig031281	vOTU062268	35106	No	2	100	0	AAI-based (high-confidence)
ma2024imeta	contig031289	vOTU010859	37582	No	1	100	0	DTR (high-confidence)
ma2024imeta	contig031483	vOTU010880	40900	No	2	100	0	AAI-based (high-confidence)
ma2024imeta	contig031545	vOTU010895	39832	No	1	100	0	DTR (medium-confidence)
ma2024imeta	contig031705	vOTU010930	37157	No	2	100	0	AAI-based (high-confidence)
ma2024imeta	contig031737	vOTU010934	40010	No	2	100	0	AAI-based (high-confidence)
ma2024imeta	contig031812	vOTU010956	100375	No	2	100	0	AAI-based (high-confidence)
ma2024imeta	contig031830	vOTU010963	136894	No	2	100	0	AAI-based (high-confidence)
ma2024imeta	contig031857	vOTU010976	48040	No	2	100	0	AAI-based (medium-confidence)
ma2024imeta	contig031912	vOTU010991	39483	No	1	100	0	DTR (high-confidence)
ma2024imeta	contig031927	vOTU016677	208933	No	1	100	0	DTR (high-confidence)
ma2024imeta	contig032041	vOTU011060	79338	No	1	100	0	DTR (high-confidence)
ma2024imeta	contig032158	vOTU011131	61897	No	2	100	0	AAI-based (medium-confidence)
ma2024imeta	contig032318	vOTU011199	41970	No	1	100	0	DTR (high-confidence)
ma2024imeta	contig032320	vOTU011201	22813	No	1	100	0	DTR (high-confidence)
ma2024imeta	contig032322	vOTU011203	5298	No	1	100	0	DTR (high-confidence)
ma2024imeta	contig032363	vOTU011221	66364	No	1	100	0	DTR (high-confidence)
ma2024imeta	contig032372	vOTU011227	43711	No	2	100	0	AAI-based (high-confidence)
ma2024imeta	contig032375	vOTU011228	43937	No	1	100	0	DTR (high-confidence)
ma2024imeta	contig032399	vOTU011244	60295	No	1	100	0	DTR (medium-confidence)
ma2024imeta	contig032499	vOTU011299	29633	No	1	100	0	DTR (high-confidence)
ma2024imeta	contig032523	vOTU011312	12026	No	2	100	0	AAI-based (medium-confidence)
ma2024imeta	contig032543	vOTU011323	40574	No	2	100	0	AAI-based (medium-confidence)
ma2024imeta	contig032599	vOTU011357	38919	No	1	100	0	DTR (high-confidence)
ma2024imeta	contig032764	vOTU011460	51668	No	1	100	0	DTR (high-confidence)
ma2024imeta	contig032773	vOTU011467	57106	No	1	100	0	DTR (high-confidence)
ma2024imeta	contig032780	vOTU011471	267386	No	1	100	0	DTR (high-confidence)
ma2024imeta	contig032783	vOTU011473	47134	No	2	100	0	AAI-based (medium-confidence)
ma2024imeta	contig032789	vOTU011477	163548	No	1	100	0	DTR (high-confidence)
ma2024imeta	contig032792	vOTU011479	59263	No	1	100	0	DTR (high-confidence)
ma2024imeta	contig032797	vOTU011483	37147	No	1	100	0	DTR (high-confidence)
ma2024imeta	contig032798	vOTU011484	66702	No	1	100	0	DTR (high-confidence)
ma2024imeta	contig032807	vOTU011487	44390	No	1	100	0	DTR (high-confidence)
ma2024imeta	contig032809	vOTU011488	134115	No	1	100	0	DTR (medium-confidence)
ma2024imeta	contig032847	vOTU011513	41873	No	1	100	0	DTR (high-confidence)
ma2024imeta	contig032912	vOTU011558	40315	No	2	100	0	AAI-based (medium-confidence)
ma2024imeta	contig032914	vOTU011560	29535	No	1	100	0	DTR (medium-confidence)
ma2024imeta	contig032977	vOTU011599	49099	No	2	100	0	AAI-based (medium-confidence)
ma2024imeta	contig033045	vOTU011642	53866	No	1	100	0	DTR (medium-confidence)
ma2024imeta	contig033146	vOTU011694	42985	No	1	100	0	DTR (high-confidence)
ma2024imeta	contig033310	vOTU011760	66795	No	2	100	0	AAI-based (high-confidence)
ma2024imeta	contig033540	vOTU011866	42235	No	2	100	0	AAI-based (high-confidence)
ma2024imeta	contig033565	vOTU011877	39712	No	1	100	0	DTR (high-confidence)
ma2024imeta	contig033569	vOTU011880	51465	No	1	100	0	DTR (high-confidence)
ma2024imeta	contig033676	vOTU011933	40042	No	1	100	0	DTR (high-confidence)
ma2024imeta	contig033724	vOTU011965	35147	No	1	100	0	DTR (high-confidence)
ma2024imeta	contig033739	vOTU011972	26787	No	1	100	0	DTR (high-confidence)
ma2024imeta	contig033769	vOTU011992	36534	No	1	100	0	DTR (high-confidence)
ma2024imeta	contig033777	vOTU011997	84824	No	2	100	0	AAI-based (high-confidence)
ma2024imeta	contig033826	vOTU012028	31311	No	2	100	0	AAI-based (medium-confidence)
ma2024imeta	contig033885	vOTU012066	122884	No	1	100	0	DTR (medium-confidence)
ma2024imeta	contig033923	vOTU012089	42982	No	1	100	0	DTR (high-confidence)
ma2024imeta	contig033925	vOTU012091	36915	No	1	100	0	DTR (high-confidence)
ma2024imeta	contig033929	vOTU012093	36228	No	1	100	0	DTR (high-confidence)
ma2024imeta	contig033935	vOTU012095	79123	No	1	100	0	DTR (high-confidence)
ma2024imeta	contig033943	vOTU012100	5814	No	1	100	0	DTR (high-confidence)
ma2024imeta	contig034026	vOTU012148	101749	No	2	100	0	AAI-based (medium-confidence)
ma2024imeta	contig034030	vOTU012152	44119	No	2	100	0	AAI-based (medium-confidence)
ma2024imeta	contig034037	vOTU012155	62801	No	1	100	0	DTR (high-confidence)
ma2024imeta	contig034075	vOTU012178	34112	No	1	100	0	DTR (high-confidence)
ma2024imeta	contig034082	vOTU012183	35096	No	2	100	0	AAI-based (high-confidence)
ma2024imeta	contig034113	vOTU012199	86721	No	2	100	0	AAI-based (high-confidence)
ma2024imeta	contig034144	vOTU012217	43874	No	2	100	0	AAI-based (high-confidence)
ma2024imeta	contig034200	vOTU012237	59615	No	1	100	0	DTR (high-confidence)
ma2024imeta	contig034289	vOTU012278	36230	No	1	100	0	DTR (medium-confidence)
ma2024imeta	contig034363	vOTU012315	29470	No	1	100	0	DTR (medium-confidence)
ma2024imeta	contig034550	vOTU012403	42883	No	1	100	0	DTR (medium-confidence)
ma2024imeta	contig034551	vOTU012404	32897	No	1	100	0	DTR (medium-confidence)
ma2024imeta	contig034552	vOTU012405	40466	No	1	100	0	DTR (high-confidence)
ma2024imeta	contig034560	vOTU012410	27070	No	1	100	0	DTR (high-confidence)
ma2024imeta	contig034675	vOTU023603	38137	No	1	100	0	DTR (high-confidence)
ma2024imeta	contig034690	vOTU012476	38432	No	1	100	0	DTR (high-confidence)
ma2024imeta	contig034729	vOTU012498	39909	No	2	100	0	AAI-based (medium-confidence)
ma2024imeta	contig034765	vOTU012511	37609	No	2	100	0	AAI-based (medium-confidence)
ma2024imeta	contig034838	vOTU012572	37143	No	2	100	0	AAI-based (medium-confidence)
ma2024imeta	contig034910	vOTU012612	49580	No	2	100	0	AAI-based (medium-confidence)
ma2024imeta	contig034959	vOTU012652	47190	No	1	100	0	DTR (high-confidence)
ma2024imeta	contig034964	vOTU012657	36138	No	2	100	0	AAI-based (high-confidence)
ma2024imeta	contig034986	vOTU012670	34019	No	1	100	0	DTR (high-confidence)
ma2024imeta	contig035122	vOTU012739	37632	No	1	100	0	DTR (high-confidence)
ma2024imeta	contig035186	vOTU012762	33168	No	1	100	0	DTR (high-confidence)
ma2024imeta	contig035187	vOTU061175	41152	No	2	100	0	AAI-based (medium-confidence)
ma2024imeta	contig035413	vOTU013063	48127	No	2	100	0	AAI-based (medium-confidence)
ma2024imeta	contig035446	vOTU012864	37122	No	2	100	0	AAI-based (medium-confidence)
ma2024imeta	contig035596	vOTU013990	55733	No	2	100	0	AAI-based (high-confidence)
ma2024imeta	contig035750	vOTU012965	39941	No	2	100	0	AAI-based (high-confidence)
ma2024imeta	contig035872	vOTU013007	51368	No	2	100	0	AAI-based (high-confidence)
ma2024imeta	contig035946	vOTU013032	40170	No	2	100	0	AAI-based (high-confidence)
ma2024imeta	contig035969	vOTU013044	34104	No	1	100	0	DTR (high-confidence)
ma2024imeta	contig036022	vOTU013066	57740	No	1	100	0	DTR (high-confidence)
ma2024imeta	contig036179	vOTU013125	33220	No	2	100	0	AAI-based (high-confidence)
ma2024imeta	contig036278	vOTU013168	60807	No	1	100	0	DTR (high-confidence)
ma2024imeta	contig036315	vOTU013184	42556	No	1	100	0	DTR (high-confidence)
ma2024imeta	contig036331	vOTU013191	47918	No	2	100	0	AAI-based (medium-confidence)
ma2024imeta	contig036518	vOTU013262	44076	No	1	100	0	DTR (high-confidence)
ma2024imeta	contig036521	vOTU124696	50931	No	1	100	0	DTR (high-confidence)
ma2024imeta	contig036527	vOTU013266	33099	No	1	100	0	DTR (high-confidence)
ma2024imeta	contig036626	vOTU013300	35873	No	1	100	0	DTR (medium-confidence)
ma2024imeta	contig036707	vOTU013336	34118	No	2	100	0	AAI-based (high-confidence)
ma2024imeta	contig036769	vOTU013359	42132	No	1	100	0	DTR (high-confidence)
ma2024imeta	contig036945	vOTU013425	54683	No	2	100	0	AAI-based (high-confidence)
ma2024imeta	contig037070	vOTU013486	69052	No	1	100	0	DTR (high-confidence)
ma2024imeta	contig037072	vOTU013487	50663	No	1	100	0	DTR (medium-confidence)
ma2024imeta	contig037073	vOTU013488	31779	No	1	100	0	DTR (high-confidence)
ma2024imeta	contig037079	vOTU013491	34595	No	1	100	0	DTR (medium-confidence)
ma2024imeta	contig037081	vOTU013492	38711	No	1	100	0	DTR (high-confidence)
ma2024imeta	contig037083	vOTU013493	31664	No	1	100	0	DTR (high-confidence)
ma2024imeta	contig037088	vOTU013495	100411	No	1	100	0	DTR (high-confidence)
ma2024imeta	contig037094	vOTU013499	66012	Yes	2	100	3.32	AAI-based (medium-confidence)
ma2024imeta	contig037157	vOTU013523	38005	No	2	100	0	AAI-based (high-confidence)
ma2024imeta	contig037208	vOTU013534	48470	No	2	100	0	AAI-based (high-confidence)
ma2024imeta	contig037332	vOTU013570	36416	No	1	100	0	DTR (high-confidence)
ma2024imeta	contig037401	vOTU013593	36539	No	1	100	0	DTR (high-confidence)
ma2024imeta	contig037424	vOTU013601	5229	No	2	100	0	AAI-based (high-confidence)
ma2024imeta	contig037555	vOTU013663	48155	No	2	100	0	AAI-based (high-confidence)
ma2024imeta	contig037869	vOTU013805	44514	No	2	100	0	AAI-based (high-confidence)
ma2024imeta	contig037944	vOTU013840	50819	No	1	100	0	DTR (high-confidence)
ma2024imeta	contig037946	vOTU013842	39654	No	1	100	0	DTR (high-confidence)
ma2024imeta	contig037966	vOTU013852	36683	No	1	100	0	DTR (high-confidence)
ma2024imeta	contig038076	vOTU013901	44750	No	2	100	0	AAI-based (high-confidence)
ma2024imeta	contig038182	vOTU013933	45786	No	1	100	0	DTR (high-confidence)
ma2024imeta	contig038225	vOTU013952	32960	No	2	100	0	AAI-based (high-confidence)
ma2024imeta	contig038265	vOTU013964	41544	No	1	100	0	DTR (high-confidence)
ma2024imeta	contig038393	vOTU014014	40402	No	1	100	0	DTR (high-confidence)
ma2024imeta	contig038397	vOTU014016	33203	No	1	100	0	DTR (high-confidence)
ma2024imeta	contig038493	vOTU014047	56087	No	2	100	0	AAI-based (high-confidence)
ma2024imeta	contig038693	vOTU014118	38786	No	1	100	0	DTR (high-confidence)
ma2024imeta	contig038742	vOTU014136	34921	No	1	100	0	DTR (high-confidence)
ma2024imeta	contig038967	vOTU014230	35285	No	1	100	0	DTR (high-confidence)
ma2024imeta	contig039140	vOTU014285	47849	No	2	100	0	AAI-based (high-confidence)
ma2024imeta	contig039177	vOTU014300	52081	No	2	100	0	AAI-based (high-confidence)
ma2024imeta	contig039262	vOTU014334	5255	No	2	100	0	AAI-based (medium-confidence)
ma2024imeta	contig039349	vOTU014366	11509	No	1	100	0	ITR (high-confidence)
ma2024imeta	contig039360	vOTU014368	50158	No	1	100	0	DTR (high-confidence)
ma2024imeta	contig039432	vOTU014385	142219	Yes	2	100	1.15	AAI-based (high-confidence)
ma2024imeta	contig039449	vOTU014395	5226	No	2	100	0	AAI-based (high-confidence)
ma2024imeta	contig039691	vOTU014447	38061	No	1	100	0	DTR (medium-confidence)
ma2024imeta	contig039779	vOTU014471	53969	No	2	100	0	AAI-based (medium-confidence)
ma2024imeta	contig039844	vOTU014499	39812	No	2	100	0	AAI-based (high-confidence)
ma2024imeta	contig039879	vOTU014513	32913	No	2	100	0	AAI-based (high-confidence)
ma2024imeta	contig040078	vOTU014596	36927	No	1	100	0	DTR (high-confidence)
ma2024imeta	contig040089	vOTU014603	53870	No	1	100	0	DTR (high-confidence)
ma2024imeta	contig040104	vOTU014611	33491	No	1	100	0	DTR (medium-confidence)
ma2024imeta	contig040114	vOTU014616	39408	No	1	100	0	DTR (high-confidence)
ma2024imeta	contig040148	vOTU014638	39864	No	2	100	0	AAI-based (high-confidence)
ma2024imeta	contig040153	vOTU014642	37778	No	1	100	0	DTR (high-confidence)
ma2024imeta	contig040217	vOTU014679	53423	No	1	100	0	DTR (high-confidence)
ma2024imeta	contig040222	vOTU014683	43056	No	1	100	0	DTR (high-confidence)
ma2024imeta	contig040224	vOTU121189	99172	No	1	100	0	DTR (high-confidence)
ma2024imeta	contig040225	vOTU014685	35727	No	1	100	0	DTR (high-confidence)
ma2024imeta	contig040227	vOTU014686	41360	No	1	100	0	DTR (high-confidence)
ma2024imeta	contig040231	vOTU018556	63422	No	1	100	0	DTR (high-confidence)
ma2024imeta	contig040233	vOTU014690	36728	No	1	100	0	DTR (high-confidence)
ma2024imeta	contig040236	vOTU014692	36903	No	1	100	0	DTR (medium-confidence)
ma2024imeta	contig040237	vOTU014693	39058	No	1	100	0	DTR (high-confidence)
ma2024imeta	contig040238	vOTU014694	44662	No	1	100	0	DTR (high-confidence)
ma2024imeta	contig040239	vOTU014695	38727	No	1	100	0	DTR (high-confidence)
ma2024imeta	contig040240	vOTU014696	37163	No	1	100	0	DTR (high-confidence)
ma2024imeta	contig040242	vOTU014698	5387	No	1	100	0	DTR (high-confidence)
ma2024imeta	contig040243	vOTU014699	5867	No	1	100	0	DTR (high-confidence)
ma2024imeta	contig040248	vOTU014703	5410	No	1	100	0	DTR (high-confidence)
ma2024imeta	contig040270	vOTU014714	61850	No	2	100	0	AAI-based (high-confidence)
ma2024imeta	contig040293	vOTU014731	39521	No	1	100	0	DTR (high-confidence)
ma2024imeta	contig040393	vOTU014793	39437	No	2	100	0	AAI-based (medium-confidence)
ma2024imeta	contig040468	vOTU014841	73265	No	1	100	0	DTR (high-confidence)
ma2024imeta	contig040492	vOTU014855	38223	No	2	100	0	AAI-based (high-confidence)
ma2024imeta	contig040516	vOTU014868	61664	No	2	100	0	AAI-based (high-confidence)
ma2024imeta	contig040533	vOTU014877	34245	No	2	100	0	AAI-based (medium-confidence)
ma2024imeta	contig040594	vOTU014913	41125	No	2	100	0	AAI-based (medium-confidence)
ma2024imeta	contig040661	vOTU014952	58514	No	1	100	0	DTR (high-confidence)
ma2024imeta	contig040662	vOTU014953	31539	No	1	100	0	DTR (medium-confidence)
ma2024imeta	contig040665	vOTU014954	23929	No	1	100	0	DTR (high-confidence)
ma2024imeta	contig040667	vOTU014956	41393	No	1	100	0	DTR (high-confidence)
ma2024imeta	contig040758	vOTU015000	11898	No	2	100	0	AAI-based (medium-confidence)
ma2024imeta	contig040779	vOTU015012	64526	No	2	100	0	AAI-based (high-confidence)
ma2024imeta	contig040787	vOTU015017	64727	No	2	100	0	AAI-based (high-confidence)
ma2024imeta	contig040798	vOTU015024	34646	No	1	100	0	DTR (high-confidence)
ma2024imeta	contig040820	vOTU015038	33304	No	1	100	0	DTR (high-confidence)
ma2024imeta	contig040864	vOTU015062	43962	No	2	100	0	AAI-based (medium-confidence)
ma2024imeta	contig040870	vOTU015066	30419	No	1	100	0	DTR (medium-confidence)
ma2024imeta	contig040871	vOTU015067	38424	No	1	100	0	DTR (high-confidence)
ma2024imeta	contig040989	vOTU015138	44005	No	1	100	0	DTR (high-confidence)
ma2024imeta	contig041014	vOTU015148	5268	No	2	100	0	AAI-based (medium-confidence)
ma2024imeta	contig041059	vOTU021497	11282	No	1	100	0	ITR (high-confidence)
ma2024imeta	contig041112	vOTU015197	39004	No	1	100	0	DTR (high-confidence)
ma2024imeta	contig041254	vOTU015270	34007	No	1	100	0	DTR (high-confidence)
ma2024imeta	contig041271	vOTU015282	39782	No	1	100	0	DTR (high-confidence)
ma2024imeta	contig041274	vOTU015284	44289	No	1	100	0	DTR (high-confidence)
ma2024imeta	contig041347	vOTU015335	43738	No	1	100	0	DTR (high-confidence)
ma2024imeta	contig041349	vOTU015337	40416	No	1	100	0	DTR (high-confidence)
ma2024imeta	contig041352	vOTU015339	34238	No	1	100	0	DTR (high-confidence)
ma2024imeta	contig041354	vOTU015341	33095	No	1	100	0	DTR (high-confidence)
ma2024imeta	contig041357	vOTU015344	41336	No	1	100	0	DTR (high-confidence)
ma2024imeta	contig041358	vOTU015345	32883	No	2	100	0	AAI-based (medium-confidence)
ma2024imeta	contig041360	vOTU021296	37330	No	1	100	0	DTR (high-confidence)
ma2024imeta	contig041492	vOTU015431	47110	No	2	100	0	AAI-based (medium-confidence)
ma2024imeta	contig041543	vOTU015462	38849	No	1	100	0	DTR (high-confidence)
ma2024imeta	contig041766	vOTU015592	61094	No	2	100	0	AAI-based (medium-confidence)
ma2024imeta	contig041831	vOTU015632	33869	No	2	100	0	AAI-based (high-confidence)
ma2024imeta	contig041833	vOTU015634	53536	No	1	100	0	DTR (medium-confidence)
ma2024imeta	contig041836	vOTU015637	39566	No	1	100	0	DTR (high-confidence)
ma2024imeta	contig041895	vOTU015674	28614	No	1	100	0	DTR (medium-confidence)
ma2024imeta	contig041960	vOTU015711	31394	No	1	100	0	DTR (high-confidence)
ma2024imeta	contig042093	vOTU015779	44528	No	1	100	0	DTR (high-confidence)
ma2024imeta	contig042107	vOTU015784	45597	No	1	100	0	DTR (medium-confidence)
ma2024imeta	contig042108	vOTU015785	28848	No	1	100	0	DTR (medium-confidence)
ma2024imeta	contig042137	vOTU015802	32810	No	1	100	0	DTR (medium-confidence)
ma2024imeta	contig042269	vOTU015863	51195	No	1	100	0	DTR (medium-confidence)
ma2024imeta	contig042271	vOTU015865	43538	No	1	100	0	DTR (high-confidence)
ma2024imeta	contig042277	vOTU015868	5102	No	1	100	0	DTR (high-confidence)
ma2024imeta	contig042301	vOTU015881	58033	No	1	100	0	DTR (high-confidence)
ma2024imeta	contig042406	vOTU015942	33131	No	2	100	0	AAI-based (medium-confidence)
ma2024imeta	contig042423	vOTU015956	42953	No	1	100	0	DTR (high-confidence)
ma2024imeta	contig042445	vOTU015972	45945	No	1	100	0	DTR (high-confidence)
ma2024imeta	contig042451	vOTU015976	50687	No	1	100	0	DTR (high-confidence)
ma2024imeta	contig042454	vOTU015979	48819	No	1	100	0	DTR (high-confidence)
ma2024imeta	contig042456	vOTU015981	5002	No	1	100	0	DTR (high-confidence)
ma2024imeta	contig042515	vOTU016019	104254	No	1	100	0	DTR (high-confidence)
ma2024imeta	contig042528	vOTU016031	40826	No	1	100	0	DTR (high-confidence)
ma2024imeta	contig042536	vOTU016036	42000	No	1	100	0	DTR (high-confidence)
ma2024imeta	contig042564	vOTU016053	62524	No	2	100	0	AAI-based (high-confidence)
ma2024imeta	contig042632	vOTU016100	46011	No	2	100	0	AAI-based (medium-confidence)
ma2024imeta	contig042658	vOTU016115	45443	No	1	100	0	DTR (high-confidence)
ma2024imeta	contig042828	vOTU016203	58099	No	1	100	0	DTR (high-confidence)
ma2024imeta	contig042833	vOTU016208	41305	No	1	100	0	DTR (high-confidence)
ma2024imeta	contig042875	vOTU112525	33131	No	2	100	0	AAI-based (high-confidence)
ma2024imeta	contig042916	vOTU016264	36589	No	1	100	0	DTR (medium-confidence)
ma2024imeta	contig042918	vOTU119330	44609	No	2	100	0	AAI-based (high-confidence)
ma2024imeta	contig042945	vOTU016283	53835	No	1	100	0	DTR (high-confidence)
ma2024imeta	contig043054	vOTU016354	44314	No	2	100	0	AAI-based (medium-confidence)
ma2024imeta	contig043113	vOTU016396	58904	No	1	100	0	DTR (medium-confidence)
ma2024imeta	contig043120	vOTU016402	42220	No	1	100	0	DTR (medium-confidence)
ma2024imeta	contig043124	vOTU016404	30771	No	1	100	0	DTR (medium-confidence)
ma2024imeta	contig043132	vOTU016412	38171	No	1	100	0	DTR (high-confidence)
ma2024imeta	contig043163	vOTU016434	45486	No	2	100	0	AAI-based (medium-confidence)
ma2024imeta	contig043183	vOTU016446	59821	No	1	100	0	DTR (high-confidence)
ma2024imeta	contig043230	vOTU016474	42449	No	1	100	0	DTR (medium-confidence)
ma2024imeta	contig043260	vOTU016492	38481	No	1	100	0	DTR (high-confidence)
ma2024imeta	contig043261	vOTU016493	52341	No	2	100	0	AAI-based (high-confidence)
ma2024imeta	contig043289	vOTU016513	37258	No	1	100	0	DTR (high-confidence)
ma2024imeta	contig043310	vOTU016529	55059	No	1	100	0	DTR (high-confidence)
ma2024imeta	contig043311	vOTU108454	51048	No	2	100	0	AAI-based (medium-confidence)
ma2024imeta	contig043330	vOTU016540	44057	No	2	100	0	AAI-based (medium-confidence)
ma2024imeta	contig043445	vOTU016586	38512	No	1	100	0	DTR (high-confidence)
ma2024imeta	contig043463	vOTU016590	35279	No	1	100	0	DTR (high-confidence)
ma2024imeta	contig043506	vOTU016603	37950	No	1	100	0	DTR (medium-confidence)
ma2024imeta	contig043507	vOTU035899	5272	No	1	100	0	DTR (high-confidence)
ma2024imeta	contig043622	vOTU016634	38680	No	2	100	0	AAI-based (medium-confidence)
ma2024imeta	contig043654	vOTU016645	45055	No	2	100	0	AAI-based (high-confidence)
ma2024imeta	contig043749	vOTU016680	55273	No	1	100	0	DTR (high-confidence)
ma2024imeta	contig043753	vOTU016682	78091	No	1	100	0	DTR (high-confidence)
ma2024imeta	contig043757	vOTU016683	98252	No	1	100	0	DTR (high-confidence)
ma2024imeta	contig043846	vOTU016711	34433	No	1	100	0	DTR (medium-confidence)
ma2024imeta	contig043937	vOTU016606	52259	No	2	100	0	AAI-based (high-confidence)
ma2024imeta	contig044148	vOTU016782	48201	No	2	100	0	AAI-based (high-confidence)
ma2024imeta	contig044152	vOTU026129	62174	No	1	100	0	DTR (high-confidence)
ma2024imeta	contig044164	vOTU008734	45965	No	2	100	0	AAI-based (medium-confidence)
ma2024imeta	contig044379	vOTU016823	36840	No	1	100	0	DTR (high-confidence)
ma2024imeta	contig044434	vOTU016654	40732	No	2	100	0	AAI-based (high-confidence)
ma2024imeta	contig044475	vOTU003491	48734	No	2	100	0	AAI-based (high-confidence)
ma2024imeta	contig044710	vOTU016864	53419	No	2	100	0	AAI-based (high-confidence)
ma2024imeta	contig044921	vOTU016977	140950	No	1	100	0	DTR (high-confidence)
ma2024imeta	contig044922	vOTU016978	32734	No	1	100	0	DTR (medium-confidence)
ma2024imeta	contig044975	vOTU017002	14182	No	2	100	0	AAI-based (high-confidence)
ma2024imeta	contig044986	vOTU017008	40516	No	1	100	0	DTR (medium-confidence)
ma2024imeta	contig044987	vOTU017009	48258	No	1	100	0	DTR (high-confidence)
ma2024imeta	contig045040	vOTU017040	38190	No	1	100	0	DTR (medium-confidence)
ma2024imeta	contig045071	vOTU017054	48873	No	2	100	0	AAI-based (medium-confidence)
ma2024imeta	contig045127	vOTU017084	101493	No	2	100	0	AAI-based (medium-confidence)
ma2024imeta	contig045143	vOTU017091	36695	No	1	100	0	DTR (high-confidence)
ma2024imeta	contig045173	vOTU017113	35489	No	1	100	0	DTR (high-confidence)
ma2024imeta	contig045205	vOTU017139	43333	No	1	100	0	DTR (high-confidence)
ma2024imeta	contig045222	vOTU017147	106502	No	1	100	0	DTR (high-confidence)
ma2024imeta	contig045317	vOTU018302	7736	No	2	100	0	AAI-based (high-confidence)
ma2024imeta	contig045329	vOTU017207	41469	No	2	100	0	AAI-based (medium-confidence)
ma2024imeta	contig045361	vOTU017226	54138	No	2	100	0	AAI-based (high-confidence)
ma2024imeta	contig045429	vOTU017263	53510	No	1	100	0	DTR (high-confidence)
ma2024imeta	contig045453	vOTU017278	36373	No	1	100	0	DTR (high-confidence)
ma2024imeta	contig045456	vOTU017281	47527	No	1	100	0	DTR (high-confidence)
ma2024imeta	contig045460	vOTU017284	181524	No	1	100	0	DTR (high-confidence)
ma2024imeta	contig045467	vOTU017289	270971	No	1	100	0	DTR (high-confidence)
ma2024imeta	contig045472	vOTU017294	100702	No	1	100	0	DTR (high-confidence)
ma2024imeta	contig045474	vOTU017295	86621	No	1	100	0	DTR (high-confidence)
ma2024imeta	contig045561	vOTU017336	42103	No	1	100	0	DTR (high-confidence)
ma2024imeta	contig045563	vOTU017338	38044	No	1	100	0	DTR (high-confidence)
ma2024imeta	contig045646	vOTU017385	41371	No	1	100	0	DTR (high-confidence)
ma2024imeta	contig045666	vOTU017397	51015	No	2	100	0	AAI-based (medium-confidence)
ma2024imeta	contig045674	vOTU017403	62514	No	1	100	0	DTR (high-confidence)
ma2024imeta	contig045739	vOTU017443	46977	No	1	100	0	DTR (high-confidence)
ma2024imeta	contig045748	vOTU017448	59340	No	1	100	0	DTR (high-confidence)
ma2024imeta	contig045776	vOTU017464	44274	No	1	100	0	DTR (high-confidence)
ma2024imeta	contig045779	vOTU017467	35132	No	1	100	0	DTR (high-confidence)
ma2024imeta	contig045785	vOTU017471	37252	No	1	100	0	DTR (high-confidence)
ma2024imeta	contig045806	vOTU017488	37392	No	2	100	0	AAI-based (high-confidence)
ma2024imeta	contig045880	vOTU017530	34649	No	2	100	0	AAI-based (medium-confidence)
ma2024imeta	contig045886	vOTU017534	42397	No	1	100	0	DTR (high-confidence)
ma2024imeta	contig045912	vOTU017550	42795	No	2	100	0	AAI-based (high-confidence)
ma2024imeta	contig045931	vOTU017561	41365	No	2	100	0	AAI-based (high-confidence)
ma2024imeta	contig045932	vOTU017562	80691	No	2	100	0	AAI-based (medium-confidence)
ma2024imeta	contig045968	vOTU017586	141926	No	1	100	0	DTR (medium-confidence)
ma2024imeta	contig046017	vOTU017618	102832	No	2	100	0	AAI-based (medium-confidence)
ma2024imeta	contig046049	vOTU017639	44305	No	1	100	0	DTR (high-confidence)
ma2024imeta	contig046106	vOTU017676	41939	No	1	100	0	DTR (high-confidence)
ma2024imeta	contig046116	vOTU017683	41619	No	1	100	0	DTR (high-confidence)
ma2024imeta	contig046118	vOTU017684	40502	No	1	100	0	DTR (medium-confidence)
ma2024imeta	contig046121	vOTU017686	46341	No	1	100	0	DTR (high-confidence)
ma2024imeta	contig046123	vOTU017688	6203	No	1	100	0	DTR (high-confidence)
ma2024imeta	contig046328	vOTU017803	41409	No	1	100	0	DTR (high-confidence)
ma2024imeta	contig046393	vOTU017839	116870	No	2	100	0	AAI-based (medium-confidence)
ma2024imeta	contig046413	vOTU017852	35647	No	1	100	0	DTR (high-confidence)
ma2024imeta	contig046415	vOTU017853	36237	No	1	100	0	DTR (high-confidence)
ma2024imeta	contig046459	vOTU017870	42548	No	1	100	0	DTR (high-confidence)
ma2024imeta	contig046470	vOTU017876	34548	No	2	100	0	AAI-based (medium-confidence)
ma2024imeta	contig046474	vOTU017880	41445	No	1	100	0	DTR (high-confidence)
ma2024imeta	contig046703	vOTU017999	89895	No	1	100	0	DTR (medium-confidence)
ma2024imeta	contig046704	vOTU018000	40010	No	1	100	0	DTR (high-confidence)
ma2024imeta	contig046715	vOTU018007	37292	No	1	100	0	DTR (high-confidence)
ma2024imeta	contig046833	vOTU018073	62419	No	2	100	0	AAI-based (high-confidence)
ma2024imeta	contig046855	vOTU018083	164229	No	1	100	0	DTR (high-confidence)
ma2024imeta	contig046866	vOTU017176	59698	No	1	100	0	DTR (high-confidence)
ma2024imeta	contig046952	vOTU018135	41548	No	2	100	0	AAI-based (high-confidence)
ma2024imeta	contig046967	vOTU018145	43819	No	1	100	0	DTR (high-confidence)
ma2024imeta	contig046980	vOTU018153	44589	No	2	100	0	AAI-based (high-confidence)
ma2024imeta	contig047011	vOTU018169	43243	No	1	100	0	DTR (high-confidence)
ma2024imeta	contig047117	vOTU018234	168824	No	1	100	0	DTR (high-confidence)
ma2024imeta	contig047118	vOTU018235	40041	No	1	100	0	DTR (high-confidence)
ma2024imeta	contig047119	vOTU018726	164239	No	1	100	0	DTR (high-confidence)
ma2024imeta	contig047121	vOTU018237	33742	No	1	100	0	DTR (high-confidence)
ma2024imeta	contig047123	vOTU018238	80814	No	1	100	0	DTR (high-confidence)
ma2024imeta	contig047126	vOTU018241	68963	No	1	100	0	DTR (high-confidence)
ma2024imeta	contig047129	vOTU018243	51922	No	1	100	0	DTR (high-confidence)
ma2024imeta	contig047131	vOTU018244	5733	No	1	100	0	DTR (high-confidence)
ma2024imeta	contig047136	vOTU018246	127820	No	1	100	0	DTR (high-confidence)
ma2024imeta	contig047143	vOTU018248	5740	No	2	100	0	AAI-based (medium-confidence)
ma2024imeta	contig047173	vOTU018266	190908	No	1	100	0	DTR (high-confidence)
ma2024imeta	contig047232	vOTU018295	34297	No	2	100	0	AAI-based (high-confidence)
ma2024imeta	contig047241	vOTU018300	34013	No	1	100	0	DTR (high-confidence)
ma2024imeta	contig047271	vOTU018315	5028	No	2	100	0	AAI-based (medium-confidence)
ma2024imeta	contig047272	vOTU018316	35633	No	2	100	0	AAI-based (medium-confidence)
ma2024imeta	contig047326	vOTU018340	102422	No	2	100	0	AAI-based (high-confidence)
ma2024imeta	contig047400	vOTU020797	165339	No	1	100	0	DTR (high-confidence)
ma2024imeta	contig047404	vOTU018392	177434	No	1	100	0	DTR (high-confidence)
ma2024imeta	contig047408	vOTU018393	187700	No	1	100	0	DTR (high-confidence)
ma2024imeta	contig047409	vOTU018394	38376	No	1	100	0	DTR (high-confidence)
ma2024imeta	contig047410	vOTU018395	47981	No	1	100	0	DTR (high-confidence)
ma2024imeta	contig047411	vOTU018396	38303	No	1	100	0	DTR (high-confidence)
ma2024imeta	contig047448	vOTU018419	50487	No	1	100	0	DTR (high-confidence)
ma2024imeta	contig047450	vOTU018420	5882	No	1	100	0	DTR (high-confidence)
ma2024imeta	contig047579	vOTU018495	41230	No	1	100	0	DTR (high-confidence)
ma2024imeta	contig047580	vOTU018496	35041	No	2	100	0	AAI-based (high-confidence)
ma2024imeta	contig047633	vOTU018525	44488	No	2	100	0	AAI-based (high-confidence)
ma2024imeta	contig047645	vOTU018533	49073	No	2	100	0	AAI-based (medium-confidence)
ma2024imeta	contig047687	vOTU018554	162473	No	1	100	0	DTR (high-confidence)
ma2024imeta	contig047699	vOTU018561	92879	No	2	100	0	AAI-based (high-confidence)
ma2024imeta	contig047712	vOTU018568	58118	No	2	100	0	AAI-based (medium-confidence)
ma2024imeta	contig047722	vOTU018573	146109	No	1	100	0	DTR (high-confidence)
ma2024imeta	contig047727	vOTU018575	62822	No	2	100	0	AAI-based (high-confidence)
ma2024imeta	contig047819	vOTU018618	137705	No	1	100	0	DTR (high-confidence)
ma2024imeta	contig047926	vOTU018659	48868	No	1	100	0	DTR (high-confidence)
ma2024imeta	contig047929	vOTU018661	64092	No	1	100	0	DTR (high-confidence)
ma2024imeta	contig047930	vOTU018662	59391	No	1	100	0	DTR (high-confidence)
ma2024imeta	contig047931	vOTU018663	83671	No	1	100	0	DTR (high-confidence)
ma2024imeta	contig047932	vOTU018664	35425	No	1	100	0	DTR (medium-confidence)
ma2024imeta	contig047943	vOTU018669	59765	No	2	100	0	AAI-based (high-confidence)
ma2024imeta	contig048020	vOTU018706	6209	No	2	100	0	AAI-based (medium-confidence)
ma2024imeta	contig048085	vOTU018743	40525	No	1	100	0	DTR (high-confidence)
ma2024imeta	contig048269	vOTU018824	58694	No	1	100	0	DTR (high-confidence)
ma2024imeta	contig048270	vOTU018825	50874	No	1	100	0	DTR (high-confidence)
ma2024imeta	contig048271	vOTU018826	51367	No	1	100	0	DTR (high-confidence)
ma2024imeta	contig048272	vOTU018827	38905	No	1	100	0	DTR (medium-confidence)
ma2024imeta	contig048275	vOTU018829	37045	No	1	100	0	DTR (high-confidence)
ma2024imeta	contig048305	vOTU018848	49173	No	2	100	0	AAI-based (high-confidence)
ma2024imeta	contig048360	vOTU018882	36695	No	2	100	0	AAI-based (high-confidence)
ma2024imeta	contig048590	vOTU018973	131755	No	1	100	0	DTR (medium-confidence)
ma2024imeta	contig048595	vOTU018975	134974	No	2	100	0	AAI-based (high-confidence)
ma2024imeta	contig048738	vOTU019034	5756	No	1	100	0	DTR (high-confidence)
ma2024imeta	contig048818	vOTU019054	40342	No	2	100	0	AAI-based (medium-confidence)
ma2024imeta	contig048865	vOTU019371	48060	No	2	100	0	AAI-based (high-confidence)
ma2024imeta	contig048894	vOTU020818	59953	No	1	100	0	DTR (high-confidence)
ma2024imeta	contig048943	vOTU019243	46428	No	2	100	0	AAI-based (high-confidence)
ma2024imeta	contig048949	vOTU019103	34074	No	1	100	0	DTR (high-confidence)
ma2024imeta	contig048962	vOTU019108	46863	No	2	100	0	AAI-based (medium-confidence)
ma2024imeta	contig049013	vOTU019126	58569	No	1	100	0	DTR (high-confidence)
ma2024imeta	contig049014	vOTU019127	35161	No	1	100	0	DTR (medium-confidence)
ma2024imeta	contig049015	vOTU019128	37823	No	1	100	0	DTR (high-confidence)
ma2024imeta	contig049028	vOTU019133	60739	No	1	100	0	DTR (high-confidence)
ma2024imeta	contig049086	vOTU019154	44122	No	2	100	0	AAI-based (high-confidence)
ma2024imeta	contig049092	vOTU019159	106751	No	2	100	0	AAI-based (medium-confidence)
ma2024imeta	contig049104	vOTU019164	47638	No	1	100	0	DTR (high-confidence)
ma2024imeta	contig049149	vOTU019180	37854	Yes	2	100	4.46	AAI-based (medium-confidence)
ma2024imeta	contig049254	vOTU019225	44276	No	1	100	0	DTR (high-confidence)
ma2024imeta	contig049363	vOTU019273	46639	No	1	100	0	DTR (high-confidence)
ma2024imeta	contig049380	vOTU019285	47062	No	1	100	0	DTR (high-confidence)
ma2024imeta	contig049383	vOTU019288	62670	No	1	100	0	DTR (high-confidence)
ma2024imeta	contig049385	vOTU019289	42648	No	1	100	0	DTR (medium-confidence)
ma2024imeta	contig049387	vOTU019290	32045	No	2	100	0	AAI-based (medium-confidence)
ma2024imeta	contig049388	vOTU063015	58588	No	1	100	0	DTR (high-confidence)
ma2024imeta	contig049392	vOTU019294	5795	No	1	100	0	DTR (high-confidence)
ma2024imeta	contig049401	vOTU019301	66983	No	1	100	0	DTR (medium-confidence)
ma2024imeta	contig049404	vOTU019303	59786	No	1	100	0	DTR (high-confidence)
ma2024imeta	contig049406	vOTU019304	42325	No	1	100	0	DTR (high-confidence)
ma2024imeta	contig049408	vOTU019305	39471	No	1	100	0	DTR (high-confidence)
ma2024imeta	contig049410	vOTU019306	45352	No	1	100	0	DTR (high-confidence)
ma2024imeta	contig049413	vOTU019309	55710	No	1	100	0	DTR (high-confidence)
ma2024imeta	contig049655	vOTU019428	36917	No	2	100	0	AAI-based (high-confidence)
ma2024imeta	contig049736	vOTU019451	35326	No	1	100	0	DTR (high-confidence)
ma2024imeta	contig049925	vOTU019525	5438	No	1	100	0	DTR (high-confidence)
ma2024imeta	contig050105	vOTU019604	37736	No	1	100	0	DTR (high-confidence)
ma2024imeta	contig050423	vOTU019779	44483	No	1	100	0	DTR (high-confidence)
ma2024imeta	contig050462	vOTU019805	40777	No	1	100	0	DTR (high-confidence)
ma2024imeta	contig050606	vOTU019882	47082	No	2	100	0	AAI-based (medium-confidence)
ma2024imeta	contig050649	vOTU019904	59665	No	2	100	0	AAI-based (high-confidence)
ma2024imeta	contig050662	vOTU019911	37229	No	1	100	0	DTR (high-confidence)
ma2024imeta	contig050693	vOTU019922	12166	No	1	100	0	ITR (high-confidence)
ma2024imeta	contig050701	vOTU020162	10128	No	1	100	0	ITR (medium-confidence)
ma2024imeta	contig050713	vOTU019936	45930	No	1	100	0	DTR (high-confidence)
ma2024imeta	contig050715	vOTU019937	34842	No	1	100	0	DTR (high-confidence)
ma2024imeta	contig050718	vOTU019939	40677	No	1	100	0	DTR (high-confidence)
ma2024imeta	contig050721	vOTU019940	51378	No	1	100	0	DTR (high-confidence)
ma2024imeta	contig050724	vOTU019943	44897	No	1	100	0	DTR (high-confidence)
ma2024imeta	contig050727	vOTU019946	38702	No	1	100	0	DTR (medium-confidence)
ma2024imeta	contig050730	vOTU019948	33592	No	1	100	0	DTR (medium-confidence)
ma2024imeta	contig050783	vOTU019988	38979	No	1	100	0	DTR (high-confidence)
ma2024imeta	contig050895	vOTU020065	45944	No	1	100	0	DTR (high-confidence)
ma2024imeta	contig050993	vOTU020113	5562	No	1	100	0	DTR (high-confidence)
ma2024imeta	contig051048	vOTU020141	62119	No	2	100	0	AAI-based (medium-confidence)
ma2024imeta	contig051139	vOTU020173	101386	No	1	100	0	DTR (high-confidence)
ma2024imeta	contig051326	vOTU020247	39987	No	2	100	0	AAI-based (medium-confidence)
ma2024imeta	contig051423	vOTU020280	34920	No	2	100	0	AAI-based (medium-confidence)
ma2024imeta	contig051573	vOTU020271	7700	No	2	100	0	AAI-based (medium-confidence)
ma2024imeta	contig051741	vOTU020401	5459	No	2	100	0	AAI-based (high-confidence)
ma2024imeta	contig051862	vOTU020436	6663	No	1	100	0	DTR (high-confidence)
ma2024imeta	contig051911	vOTU062504	43122	No	1	100	0	DTR (high-confidence)
ma2024imeta	contig051965	vOTU020476	61479	No	2	100	0	AAI-based (medium-confidence)
ma2024imeta	contig052040	vOTU020498	49392	No	1	100	0	DTR (high-confidence)
ma2024imeta	contig052140	vOTU020532	5658	No	2	100	0	AAI-based (high-confidence)
ma2024imeta	contig052220	vOTU020569	6361	No	2	100	0	AAI-based (medium-confidence)
ma2024imeta	contig052271	vOTU020591	24678	No	1	100	0	DTR (high-confidence)
ma2024imeta	contig052275	vOTU020595	37729	No	1	100	0	DTR (high-confidence)
ma2024imeta	contig052279	vOTU020597	24789	No	1	100	0	DTR (high-confidence)
ma2024imeta	contig052571	vOTU020718	51221	No	2	100	0	AAI-based (medium-confidence)
ma2024imeta	contig052737	vOTU020795	74412	No	1	100	0	ITR (high-confidence)
ma2024imeta	contig052745	vOTU020801	5629	No	1	100	0	DTR (high-confidence)
ma2024imeta	contig053110	vOTU020900	67336	No	1	100	0	DTR (high-confidence)
ma2024imeta	contig053112	vOTU020901	5216	No	1	100	0	DTR (high-confidence)
ma2024imeta	contig053253	vOTU020941	55239	No	2	100	0	AAI-based (medium-confidence)
ma2024imeta	contig053258	vOTU020944	41094	No	2	100	0	AAI-based (high-confidence)
ma2024imeta	contig053304	vOTU020966	110033	No	1	100	0	DTR (high-confidence)
ma2024imeta	contig053328	vOTU136495	37754	No	1	100	0	DTR (high-confidence)
ma2024imeta	contig053330	vOTU020978	16501	No	1	100	0	DTR (high-confidence)
ma2024imeta	contig053474	vOTU021062	41260	No	1	100	0	DTR (high-confidence)
ma2024imeta	contig053486	vOTU021069	139643	No	1	100	0	DTR (high-confidence)
ma2024imeta	contig053513	vOTU021080	45138	No	2	100	0	AAI-based (high-confidence)
ma2024imeta	contig053633	vOTU021148	77096	No	2	100	0	AAI-based (medium-confidence)
ma2024imeta	contig053672	vOTU021169	62937	No	2	100	0	AAI-based (high-confidence)
ma2024imeta	contig053674	vOTU021170	32893	No	1	100	0	DTR (high-confidence)
ma2024imeta	contig053675	vOTU021171	43538	No	2	100	0	AAI-based (high-confidence)
ma2024imeta	contig053676	vOTU021172	56480	No	1	100	0	DTR (high-confidence)
ma2024imeta	contig053680	vOTU021175	117020	No	1	100	0	DTR (high-confidence)
ma2024imeta	contig053682	vOTU021176	61352	No	1	100	0	DTR (high-confidence)
ma2024imeta	contig053683	vOTU021177	34280	No	1	100	0	DTR (high-confidence)
ma2024imeta	contig053697	vOTU021181	30634	No	2	100	0	AAI-based (medium-confidence)
SRR17030618	contig053759	vOTU021198	14831	No	1	100	0	DTR (high-confidence)
SRR17030619	contig053785	vOTU021592	76995	No	1	100	0	DTR (high-confidence)
SRR17030620	contig053913	vOTU021253	49758	No	1	100	0	DTR (high-confidence)
SRR17030620	contig053918	vOTU073771	15265	No	2	100	0	AAI-based (high-confidence)
SRR17030620	contig053960	vOTU021268	43375	No	1	100	0	DTR (medium-confidence)
SRR17030621	contig054011	vOTU021291	43322	No	2	100	0	AAI-based (medium-confidence)
SRR17030621	contig054032	vOTU021304	53788	No	1	100	0	DTR (high-confidence)
SRR17030621	contig054038	vOTU021974	37926	No	2	100	0	AAI-based (medium-confidence)
SRR17030621	contig054042	vOTU021307	67044	No	2	100	0	AAI-based (medium-confidence)
SRR17030621	contig054045	vOTU021341	46169	No	1	100	0	DTR (high-confidence)
SRR17030622	contig054129	vOTU021337	35381	No	2	100	0	AAI-based (high-confidence)
SRR17030624	contig054164	vOTU021346	54008	No	2	100	0	AAI-based (medium-confidence)
SRR17030624	contig054203	vOTU021360	81646	No	1	100	0	DTR (medium-confidence)
SRR17030625	contig054268	vOTU021379	176695	No	2	100	0	AAI-based (high-confidence)
SRR17030626	contig054327	vOTU021406	65382	No	1	100	0	DTR (high-confidence)
SRR17030626	contig054371	vOTU021419	98705	No	1	100	0	DTR (high-confidence)
SRR17030627	contig054406	vOTU021433	103158	No	1	100	0	DTR (high-confidence)
SRR17030628	contig054437	vOTU021443	41951	No	2	100	0	AAI-based (high-confidence)
SRR17030629	contig054531	vOTU021480	42951	No	2	100	0	AAI-based (medium-confidence)
SRR17030629	contig054544	vOTU021483	36164	No	1	100	0	DTR (high-confidence)
SRR17030630	contig054609	vOTU021508	97048	No	1	100	0	DTR (high-confidence)
SRR17030631	contig054662	vOTU021488	35291	No	1	100	0	DTR (high-confidence)
SRR17030631	contig054703	vOTU021545	80359	No	1	100	0	DTR (high-confidence)
SRR17030636	contig054868	vOTU021591	82409	No	1	100	0	DTR (high-confidence)
SRR17030637	contig054952	vOTU021618	165435	No	1	100	0	DTR (high-confidence)
SRR17030637	contig054953	vOTU021619	96342	No	1	100	0	DTR (high-confidence)
SRR17030637	contig054967	vOTU021625	99634	No	1	100	0	DTR (high-confidence)
SRR17030639	contig054995	vOTU021639	38957	No	2	100	0	AAI-based (high-confidence)
SRR17030639	contig055053	vOTU021668	36643	No	1	100	0	DTR (high-confidence)
SRR17030639	contig055086	vOTU021682	140851	No	1	100	0	DTR (high-confidence)
SRR17030640	contig055104	vOTU021690	104297	No	2	100	0	AAI-based (high-confidence)
SRR17030640	contig055127	vOTU021699	82040	No	1	100	0	DTR (high-confidence)
SRR17030640	contig055157	vOTU021713	46831	No	2	100	0	AAI-based (high-confidence)
SRR17030640	contig055165	vOTU021717	98886	No	1	100	0	DTR (high-confidence)
SRR17030640	contig055199	vOTU021728	41199	No	1	100	0	DTR (medium-confidence)
SRR17030640	contig055200	vOTU021729	49787	No	1	100	0	DTR (high-confidence)
SRR17030641	contig055210	vOTU064908	41111	No	1	100	0	DTR (high-confidence)
SRR17030641	contig055215	vOTU021733	57477	No	2	100	0	AAI-based (high-confidence)
SRR17030641	contig055246	vOTU021741	24236	No	2	100	0	AAI-based (high-confidence)
SRR17030642	contig055313	vOTU021767	56260	No	2	100	0	AAI-based (medium-confidence)
SRR17030642	contig055349	vOTU021782	37558	No	1	100	0	DTR (high-confidence)
SRR17030642	contig055377	vOTU021795	46283	No	2	100	0	AAI-based (high-confidence)
SRR17030644	contig055440	vOTU021820	81090	No	1	100	0	DTR (high-confidence)
SRR17030644	contig055500	vOTU021967	40239	No	2	100	0	AAI-based (high-confidence)
SRR17030645	contig055547	vOTU021862	7468	No	2	100	0	AAI-based (high-confidence)
SRR17030645	contig055595	vOTU021279	174892	No	1	100	0	DTR (high-confidence)
SRR17030645	contig055597	vOTU021881	33095	No	1	100	0	DTR (high-confidence)
SRR17030645	contig055598	vOTU021882	98484	No	1	100	0	DTR (high-confidence)
SRR17030645	contig055599	vOTU021883	101553	No	1	100	0	DTR (high-confidence)
SRR17030645	contig055601	vOTU021884	123589	No	1	100	0	DTR (high-confidence)
SRR17030646	contig055626	vOTU021893	37082	No	2	100	0	AAI-based (high-confidence)
SRR17030646	contig055642	vOTU062686	46587	No	2	100	0	AAI-based (medium-confidence)
SRR17030646	contig055730	vOTU021973	101410	No	1	100	0	DTR (high-confidence)
SRR17030647	contig055800	vOTU021952	47856	No	2	100	0	AAI-based (high-confidence)
SRR17030647	contig055806	vOTU021953	83445	No	1	100	0	DTR (high-confidence)
SRR17030649	contig055922	vOTU021993	37560	No	1	100	0	DTR (medium-confidence)
SRR17030651	contig055969	vOTU022001	58404	No	2	100	0	AAI-based (high-confidence)
SRR17030652	contig056070	vOTU022054	128912	No	2	100	0	AAI-based (medium-confidence)
SRR17030652	contig056166	vOTU022113	61095	No	1	100	0	DTR (high-confidence)
SRR17030652	contig056167	vOTU022114	38506	No	1	100	0	DTR (high-confidence)
SRR17030652	contig056168	vOTU022115	5765	No	1	100	0	DTR (high-confidence)
SRR17030652	contig056169	vOTU022116	49540	No	1	100	0	DTR (high-confidence)
SRR19631093	contig056285	vOTU022182	36393	No	2	100	0	AAI-based (medium-confidence)
SRR19631093	contig056295	vOTU022190	52927	No	2	100	0	AAI-based (high-confidence)
SRR19631093	contig056349	vOTU022222	70905	No	1	100	0	DTR (high-confidence)
SRR19631093	contig056377	vOTU022233	30460	No	2	100	0	AAI-based (medium-confidence)
SRR19631094	contig056437	vOTU022262	45263	No	1	100	0	DTR (high-confidence)
SRR19631094	contig056459	vOTU022274	19219	No	1	100	0	ITR (high-confidence)
SRR19631094	contig056509	vOTU022309	33766	No	1	100	0	DTR (high-confidence)
SRR19631094	contig056529	vOTU022324	12487	No	1	100	0	DTR (high-confidence)
SRR19631094	contig056543	vOTU022331	70555	No	1	100	0	DTR (high-confidence)
SRR19631094	contig056554	vOTU022337	42420	No	1	100	0	DTR (high-confidence)
SRR19631095	contig056571	vOTU022346	43341	No	1	100	0	DTR (high-confidence)
SRR19631095	contig056588	vOTU023157	35346	No	1	100	0	DTR (high-confidence)
SRR19631103	contig056742	vOTU022445	54715	No	2	100	0	AAI-based (medium-confidence)
SRR19631103	contig056757	vOTU022455	43910	No	2	100	0	AAI-based (medium-confidence)
SRR19631103	contig056781	vOTU022476	43923	No	2	100	0	AAI-based (high-confidence)
SRR19631104	contig056831	vOTU022514	45399	No	2	100	0	AAI-based (high-confidence)
SRR19631104	contig056847	vOTU022526	60871	No	1	100	0	DTR (high-confidence)
SRR19631104	contig056890	vOTU022557	52631	No	2	100	0	AAI-based (medium-confidence)
SRR19631104	contig056901	vOTU078858	138729	No	1	100	0	DTR (high-confidence)
SRR19631104	contig056953	vOTU022596	38946	No	1	100	0	DTR (medium-confidence)
SRR19631105	contig056991	vOTU022615	17439	No	1	100	0	ITR (high-confidence)
SRR19631112	contig057069	vOTU022666	45865	No	1	100	0	DTR (high-confidence)
SRR19631112	contig057094	vOTU022680	52342	No	1	100	0	DTR (high-confidence)
SRR19631112	contig057111	vOTU022890	12529	No	1	100	0	DTR (high-confidence)
SRR19631112	contig057126	vOTU022702	47786	No	1	100	0	DTR (high-confidence)
SRR19631112	contig057141	vOTU022713	59898	No	1	100	0	DTR (high-confidence)
SRR19631112	contig057171	vOTU022734	97458	No	1	100	0	DTR (high-confidence)
SRR19631113	contig057293	vOTU022805	10822	No	1	100	0	ITR (high-confidence)
SRR19631113	contig057295	vOTU022807	48341	No	2	100	0	AAI-based (high-confidence)
SRR19631113	contig057299	vOTU022883	100151	No	1	100	0	DTR (high-confidence)
SRR19631114	contig057350	vOTU022837	39752	No	1	100	0	DTR (high-confidence)
SRR19631114	contig057448	vOTU022900	43779	No	1	100	0	DTR (high-confidence)
SRR19631123	contig057483	vOTU022920	15740	No	1	100	0	ITR (medium-confidence)
SRR19631130	contig057679	vOTU023789	10357	No	1	100	0	ITR (high-confidence)
SRR19631130	contig057779	vOTU023120	39452	No	2	100	0	AAI-based (high-confidence)
SRR19631130	contig057829	vOTU023153	42751	No	1	100	0	DTR (high-confidence)
SRR19631130	contig057834	vOTU023158	16550	No	1	100	0	DTR (high-confidence)
SRR19631131	contig058010	vOTU023265	39595	No	1	100	0	DTR (medium-confidence)
SRR19631131	contig058032	vOTU023282	39445	No	1	100	0	DTR (high-confidence)
SRR19631131	contig058091	vOTU023324	38195	No	1	100	0	DTR (high-confidence)
SRR19631132	contig058139	vOTU023360	12701	No	1	100	0	DTR (medium-confidence)
SRR19631132	contig058192	vOTU023393	47578	No	2	100	0	AAI-based (high-confidence)
SRR19631132	contig058195	vOTU023396	38582	No	1	100	0	DTR (high-confidence)
SRR19631140	contig058327	vOTU023482	37750	No	2	100	0	AAI-based (medium-confidence)
SRR19631140	contig058359	vOTU023506	57207	No	1	100	0	DTR (high-confidence)
SRR19631140	contig058500	vOTU023604	24524	No	1	100	0	DTR (medium-confidence)
SRR19631140	contig058501	vOTU023605	29548	No	1	100	0	DTR (high-confidence)
SRR19631141	contig058606	vOTU023565	10351	No	1	100	0	ITR (high-confidence)
SRR19631151	contig058895	vOTU023831	49064	No	1	100	0	DTR (high-confidence)
SRR19631151	contig058908	vOTU023840	50866	No	2	100	0	AAI-based (high-confidence)
SRR19631151	contig058996	vOTU023909	36033	No	1	100	0	DTR (high-confidence)
SRR19631151	contig059020	vOTU023926	34357	No	1	100	0	DTR (high-confidence)
SRR19631151	contig059023	vOTU023928	70643	No	1	100	0	DTR (high-confidence)
SRR19631151	contig059032	vOTU023935	37622	No	1	100	0	DTR (high-confidence)
SRR19631151	contig059070	vOTU023965	45184	No	1	100	0	DTR (high-confidence)
SRR19631151	contig059082	vOTU023976	47926	No	2	100	0	AAI-based (high-confidence)
SRR19631152	contig059117	vOTU024003	40068	No	1	100	0	DTR (high-confidence)
SRR19631152	contig059118	vOTU024004	75531	No	1	100	0	DTR (high-confidence)
SRR19631151	contig059166	vOTU024034	31786	No	2	100	0	AAI-based (high-confidence)
SRR19631151	contig059185	vOTU024049	34070	No	1	100	0	DTR (medium-confidence)
SRR19631151	contig059187	vOTU024051	56505	No	1	100	0	DTR (high-confidence)
SRR19631151	contig059188	vOTU024052	41548	No	1	100	0	DTR (high-confidence)
SRR19631152	contig059213	vOTU024069	35747	No	1	100	0	DTR (high-confidence)
SRR19631153	contig059372	vOTU062796	45130	No	1	100	0	DTR (high-confidence)
SRR19631153	contig059413	vOTU024202	51507	No	2	100	0	AAI-based (high-confidence)
SRR19631153	contig059430	vOTU024215	43065	No	2	100	0	AAI-based (high-confidence)
SRR19631153	contig059498	vOTU024263	37285	No	2	100	0	AAI-based (high-confidence)
SRR19631153	contig059511	vOTU024274	33644	No	1	100	0	DTR (high-confidence)
SRR19631153	contig059513	vOTU024276	35276	No	1	100	0	DTR (high-confidence)
SRR19631153	contig059529	vOTU024286	18749	No	2	100	0	AAI-based (medium-confidence)
SRR19631153	contig059626	vOTU024356	36069	No	1	100	0	DTR (high-confidence)
SRR19631153	contig059630	vOTU024359	40226	No	1	100	0	DTR (high-confidence)
SRR19631155	contig059694	vOTU024411	69103	No	1	100	0	DTR (high-confidence)
SRR19631155	contig059698	vOTU024415	130899	No	1	100	0	DTR (high-confidence)
SRR19631155	contig059701	vOTU024417	34789	No	1	100	0	DTR (high-confidence)
SRR19631155	contig059723	vOTU078878	114048	No	1	100	0	DTR (high-confidence)
SRR19631161	contig059767	vOTU024972	78359	No	2	100	0	AAI-based (high-confidence)
SRR19631161	contig059781	vOTU024476	49079	No	1	100	0	DTR (high-confidence)
SRR19631161	contig059826	vOTU024504	54381	No	1	100	0	DTR (high-confidence)
SRR19631161	contig059838	vOTU024510	18022	No	2	100	0	AAI-based (high-confidence)
SRR19631161	contig059855	vOTU024961	11640	No	2	100	0	AAI-based (medium-confidence)
SRR19631161	contig059861	vOTU024859	36824	No	1	100	0	DTR (high-confidence)
SRR19631161	contig060028	vOTU024616	38436	No	1	100	0	DTR (high-confidence)
SRR19631161	contig060030	vOTU024618	99670	No	1	100	0	DTR (high-confidence)
SRR19631161	contig060031	vOTU024619	43841	No	1	100	0	DTR (high-confidence)
SRR19631162	contig060192	vOTU024726	42079	No	1	100	0	DTR (high-confidence)
SRR19631162	contig060239	vOTU024750	13474	No	1	100	0	DTR (high-confidence)
SRR19631162	contig060273	vOTU024777	19390	No	1	100	0	ITR (high-confidence)
SRR19631163	contig060307	vOTU024795	41197	No	1	100	0	DTR (high-confidence)
SRR19631163	contig060309	vOTU024797	37453	No	2	100	0	AAI-based (medium-confidence)
SRR19631163	contig060523	vOTU024921	91463	No	1	100	0	DTR (high-confidence)
SRR19631163	contig060541	vOTU024931	18249	No	2	100	0	AAI-based (medium-confidence)
SRR19631163	contig060568	vOTU024946	60367	No	2	100	0	AAI-based (high-confidence)
SRR19631164	contig060627	vOTU024978	44145	No	2	100	0	AAI-based (high-confidence)
SRR19631164	contig060644	vOTU024992	73303	No	1	100	0	DTR (high-confidence)
SRR19631164	contig060867	vOTU025175	46649	No	1	100	0	DTR (high-confidence)
SRR19631164	contig060949	vOTU025246	104728	No	1	100	0	DTR (high-confidence)
SRR19631164	contig060951	vOTU025248	48727	No	1	100	0	DTR (high-confidence)
SRR19631164	contig060953	vOTU025250	38709	No	1	100	0	DTR (medium-confidence)
SRR19631165	contig060970	vOTU025263	38597	No	1	100	0	DTR (high-confidence)
SRR19631164	contig060994	vOTU025281	45624	No	1	100	0	DTR (high-confidence)
SRR19631164	contig060995	vOTU025282	57463	No	1	100	0	DTR (high-confidence)
SRR19631165	contig061106	vOTU025377	74612	No	1	100	0	DTR (high-confidence)
SRR19631165	contig061158	vOTU025422	78222	No	2	100	0	AAI-based (medium-confidence)
SRR19631165	contig061169	vOTU025431	17087	No	2	100	0	AAI-based (high-confidence)
SRR19631165	contig061251	vOTU025494	43431	No	1	100	0	DTR (high-confidence)
SRR19631165	contig061283	vOTU025515	42050	No	2	100	0	AAI-based (high-confidence)
SRR19631165	contig061286	vOTU025517	56170	No	2	100	0	AAI-based (high-confidence)
SRR19631165	contig061318	vOTU025544	11825	No	1	100	0	DTR (medium-confidence)
SRR19631166	contig061320	vOTU025546	40364	No	1	100	0	DTR (high-confidence)
SRR19631166	contig061352	vOTU113112	42994	No	1	100	0	DTR (high-confidence)
SRR19631166	contig061378	vOTU025586	11501	No	1	100	0	ITR (high-confidence)
SRR19631166	contig061383	vOTU025589	11637	No	1	100	0	ITR (high-confidence)
SRR19631167	contig061412	vOTU025608	13095	No	2	100	0	AAI-based (medium-confidence)
SRR19939423	contig061584	vOTU025726	45967	No	2	100	0	AAI-based (high-confidence)
SRR19939423	contig061590	vOTU025730	62082	No	2	100	0	AAI-based (high-confidence)
SRR19939423	contig061611	vOTU025745	47939	No	1	100	0	DTR (high-confidence)
SRR19939423	contig061671	vOTU025789	7043	No	2	100	0	AAI-based (medium-confidence)
SRR19939423	contig061690	vOTU025800	61415	No	2	100	0	AAI-based (high-confidence)
SRR19939423	contig061706	vOTU025814	35498	No	2	100	0	AAI-based (medium-confidence)
SRR19939423	contig061755	vOTU025847	80811	No	1	100	0	DTR (high-confidence)
SRR19939423	contig061821	vOTU025899	12388	No	2	100	0	AAI-based (medium-confidence)
SRR19939423	contig061851	vOTU025920	39470	No	1	100	0	DTR (high-confidence)
SRR19939423	contig061858	vOTU025925	39365	No	1	100	0	DTR (high-confidence)
SRR19939425	contig062008	vOTU026008	105716	No	1	100	0	DTR (high-confidence)
SRR19939425	contig062027	vOTU026022	43452	No	2	100	0	AAI-based (high-confidence)
SRR19939425	contig062187	vOTU026136	5371	No	1	100	0	DTR (high-confidence)
SRR19939425	contig062207	vOTU026153	5708	No	1	100	0	DTR (high-confidence)
SRR19939426	contig062278	vOTU026193	36939	No	2	100	0	AAI-based (high-confidence)
SRR19939426	contig062337	vOTU026231	62877	No	2	100	0	AAI-based (medium-confidence)
SRR19939426	contig062423	vOTU026275	39089	No	1	100	0	DTR (high-confidence)
SRR19939427	contig062507	vOTU062863	53951	No	2	100	0	AAI-based (high-confidence)
SRR19939428	contig062869	vOTU026497	33506	No	1	100	0	DTR (medium-confidence)
SRR19939429	contig063238	vOTU026703	37174	No	1	100	0	DTR (high-confidence)
SRR19939430	contig063354	vOTU044738	14563	No	2	100	0	AAI-based (medium-confidence)
SRR19939430	contig063461	vOTU026833	38932	No	1	100	0	DTR (high-confidence)
SRR19939430	contig063477	vOTU026847	39518	No	2	100	0	AAI-based (high-confidence)
SRR19939431	contig063555	vOTU026900	53394	No	2	100	0	AAI-based (high-confidence)
SRR19939431	contig063598	vOTU026929	140290	No	2	100	0	AAI-based (medium-confidence)
SRR19939431	contig063703	vOTU026991	55227	No	1	100	0	DTR (high-confidence)
SRR19939431	contig063769	vOTU136630	55797	No	2	100	0	AAI-based (medium-confidence)
SRR19939431	contig063802	vOTU027053	42859	No	2	100	0	AAI-based (medium-confidence)
SRR19939431	contig063890	vOTU027115	42240	No	2	100	0	AAI-based (medium-confidence)
SRR19939431	contig063917	vOTU027134	51829	No	1	100	0	DTR (high-confidence)
SRR19939431	contig063918	vOTU027135	13788	No	1	100	0	DTR (high-confidence)
SRR19939432	contig063920	vOTU027136	32918	No	1	100	0	DTR (high-confidence)
SRR19939432	contig063996	vOTU027187	38377	No	2	100	0	AAI-based (medium-confidence)
SRR19939432	contig063997	vOTU027188	53371	No	2	100	0	AAI-based (medium-confidence)
SRR19939433	contig064190	vOTU027302	43052	No	1	100	0	DTR (high-confidence)
SRR19939433	contig064369	vOTU027429	42690	No	1	100	0	DTR (high-confidence)
SRR19939433	contig064411	vOTU027452	42472	No	2	100	0	AAI-based (high-confidence)
SRR19939433	contig064556	vOTU027550	42597	No	1	100	0	DTR (high-confidence)
SRR19939433	contig064557	vOTU027551	5419	No	1	100	0	DTR (high-confidence)
SRR19939434	contig064571	vOTU027562	60402	No	2	100	0	AAI-based (high-confidence)
SRR19939433	contig064592	vOTU027578	63754	No	1	100	0	DTR (high-confidence)
SRR19939433	contig064593	vOTU027579	5489	No	1	100	0	DTR (high-confidence)
SRR19939434	contig064606	vOTU027585	122007	No	1	100	0	DTR (high-confidence)
SRR19939434	contig064634	vOTU027606	12964	No	2	100	0	AAI-based (medium-confidence)
SRR19939434	contig064638	vOTU027610	44686	No	2	100	0	AAI-based (high-confidence)
SRR19939434	contig064699	vOTU027652	34936	No	2	100	0	AAI-based (high-confidence)
SRR19939434	contig064784	vOTU027715	45842	No	2	100	0	AAI-based (medium-confidence)
SRR19939434	contig064880	vOTU027787	39384	No	2	100	0	AAI-based (high-confidence)
SRR19939434	contig064985	vOTU027864	31301	No	2	100	0	AAI-based (high-confidence)
SRR19939434	contig065033	vOTU027899	39986	No	1	100	0	DTR (medium-confidence)
SRR19939434	contig065099	vOTU027943	37869	No	2	100	0	AAI-based (medium-confidence)
SRR19939434	contig065153	vOTU027988	35696	No	2	100	0	AAI-based (high-confidence)
SRR19939434	contig065207	vOTU028030	32129	No	1	100	0	DTR (high-confidence)
SRR19939434	contig065208	vOTU028031	32331	No	1	100	0	DTR (high-confidence)
SRR19939434	contig065210	vOTU028033	49092	No	1	100	0	DTR (high-confidence)
SRR19939434	contig065212	vOTU028035	43193	No	1	100	0	DTR (high-confidence)
SRR19939434	contig065213	vOTU028036	42492	No	1	100	0	DTR (medium-confidence)
SRR19939434	contig065214	vOTU028037	64453	No	1	100	0	DTR (high-confidence)
SRR19939434	contig065215	vOTU052202	48574	No	1	100	0	DTR (high-confidence)
SRR19939434	contig065216	vOTU028038	46132	No	1	100	0	DTR (high-confidence)
SRR19939434	contig065217	vOTU028039	6429	No	1	100	0	DTR (high-confidence)
SRR19939435	contig065236	vOTU028055	106450	No	1	100	0	DTR (high-confidence)
SRR19939435	contig065309	vOTU028105	40336	No	1	100	0	DTR (high-confidence)
SRR19939435	contig065405	vOTU028156	28666	No	1	100	0	DTR (high-confidence)
SRR19939435	contig065464	vOTU028187	38510	No	2	100	0	AAI-based (medium-confidence)
SRR19939436	contig065738	vOTU028350	5552	No	1	100	0	DTR (high-confidence)
SRR19939437	contig065780	vOTU028375	37516	No	2	100	0	AAI-based (medium-confidence)
SRR19939437	contig066001	vOTU028456	44674	No	1	100	0	DTR (high-confidence)
SRR20661404	contig066010	vOTU028459	56459	No	2	100	0	AAI-based (high-confidence)
SRR20661404	contig066014	vOTU028461	93019	No	2	100	0	AAI-based (high-confidence)
SRR20661404	contig066111	vOTU028499	99671	No	2	100	0	AAI-based (high-confidence)
SRR20661404	contig066122	vOTU029318	41733	No	1	100	0	DTR (medium-confidence)
SRR20661404	contig066123	vOTU028505	99053	No	1	100	0	DTR (high-confidence)
SRR20661404	contig066125	vOTU028506	101631	No	1	100	0	DTR (high-confidence)
SRR20661405	contig066137	vOTU028509	62048	No	2	100	0	AAI-based (high-confidence)
SRR20661405	contig066155	vOTU028517	86022	No	2	100	0	AAI-based (medium-confidence)
SRR20661405	contig066164	vOTU028521	101167	No	1	100	0	DTR (high-confidence)
SRR20661405	contig066182	vOTU108282	80535	No	2	100	0	AAI-based (medium-confidence)
SRR20661405	contig066185	vOTU028528	102193	No	1	100	0	DTR (high-confidence)
SRR20661405	contig066192	vOTU107706	38117	No	1	100	0	DTR (high-confidence)
SRR20661405	contig066220	vOTU029022	59824	No	2	100	0	AAI-based (high-confidence)
SRR20661405	contig066246	vOTU028548	127775	No	1	100	0	DTR (high-confidence)
SRR20661405	contig066329	vOTU028575	46583	No	2	100	0	AAI-based (medium-confidence)
SRR20661405	contig066351	vOTU028585	11521	No	1	100	0	ITR (high-confidence)
SRR20661405	contig066356	vOTU028587	70415	No	1	100	0	DTR (high-confidence)
SRR20661405	contig066357	vOTU030784	39549	No	1	100	0	DTR (high-confidence)
SRR20661405	contig066366	vOTU028592	38122	No	2	100	0	AAI-based (medium-confidence)
SRR20661405	contig066367	vOTU028593	53804	No	1	100	0	DTR (high-confidence)
SRR20661405	contig066368	vOTU108209	39473	No	1	100	0	DTR (medium-confidence)
SRR20661406	contig066372	vOTU028597	34159	No	1	100	0	DTR (high-confidence)
SRR20661406	contig066400	vOTU028606	37973	No	1	100	0	DTR (high-confidence)
SRR20661406	contig066431	vOTU028838	25288	No	2	100	0	AAI-based (high-confidence)
SRR20661406	contig066441	vOTU028627	53742	No	1	100	0	DTR (high-confidence)
SRR20661406	contig066454	vOTU030681	6926	No	1	100	0	DTR (high-confidence)
SRR20661406	contig066495	vOTU063120	49522	No	2	100	0	AAI-based (high-confidence)
SRR20661406	contig066504	vOTU028652	96104	No	1	100	0	DTR (high-confidence)
SRR20661406	contig066505	vOTU028653	175059	No	1	100	0	DTR (high-confidence)
SRR20661407	contig066507	vOTU028654	61588	No	2	100	0	AAI-based (medium-confidence)
SRR20661407	contig066509	vOTU028655	35999	No	1	100	0	DTR (high-confidence)
SRR20661407	contig066532	vOTU028667	259063	No	1	100	0	DTR (high-confidence)
SRR20661407	contig066534	vOTU028668	33862	No	1	100	0	DTR (medium-confidence)
SRR20661406	contig066545	vOTU028672	101033	No	1	100	0	DTR (high-confidence)
SRR20661406	contig066546	vOTU031123	115222	No	1	100	0	DTR (high-confidence)
SRR20661406	contig066547	vOTU028673	6554	No	1	100	0	DTR (high-confidence)
SRR20661406	contig066548	vOTU028806	136344	No	1	100	0	DTR (high-confidence)
SRR20661407	contig066551	vOTU028675	46585	No	1	100	0	DTR (high-confidence)
SRR20661407	contig066554	vOTU028676	50683	No	1	100	0	DTR (high-confidence)
SRR20661407	contig066555	vOTU028677	46340	No	1	100	0	DTR (high-confidence)
SRR20661407	contig066557	vOTU028678	100816	No	1	100	0	DTR (high-confidence)
SRR20661407	contig066585	vOTU028682	13828	No	2	100	0	AAI-based (medium-confidence)
SRR20661407	contig066604	vOTU028687	54961	No	2	100	0	AAI-based (medium-confidence)
SRR20661407	contig066689	vOTU028715	51076	No	2	100	0	AAI-based (high-confidence)
SRR20661407	contig066694	vOTU028718	37260	No	2	100	0	AAI-based (high-confidence)
SRR20661407	contig066705	vOTU028723	17816	No	1	100	0	ITR (high-confidence)
SRR20661407	contig066722	vOTU028731	38869	No	2	100	0	AAI-based (high-confidence)
SRR20661407	contig066723	vOTU028732	55000	No	1	100	0	DTR (high-confidence)
SRR20661407	contig066728	vOTU028870	50645	No	1	100	0	DTR (high-confidence)
SRR20661407	contig066743	vOTU028741	45205	No	1	100	0	DTR (high-confidence)
SRR20661407	contig066785	vOTU028757	54150	No	1	100	0	DTR (medium-confidence)
SRR20661408	contig066789	vOTU028759	73827	No	2	100	0	AAI-based (high-confidence)
SRR20661408	contig066798	vOTU028762	19321	No	2	100	0	AAI-based (high-confidence)
SRR20661408	contig066800	vOTU028763	48644	No	2	100	0	AAI-based (high-confidence)
SRR20661408	contig066833	vOTU030724	17006	No	1	100	0	ITR (high-confidence)
SRR20661407	contig066842	vOTU028776	53086	No	1	100	0	DTR (high-confidence)
SRR20661408	contig066873	vOTU098565	40817	No	1	100	0	DTR (high-confidence)
SRR20661409	contig066878	vOTU030468	47180	No	1	100	0	DTR (high-confidence)
SRR20661409	contig066928	vOTU028796	19781	No	2	100	0	AAI-based (high-confidence)
SRR20661409	contig066960	vOTU028804	36584	No	1	100	0	DTR (high-confidence)
SRR20661410	contig066970	vOTU030751	39382	No	2	100	0	AAI-based (medium-confidence)
SRR20661409	contig066989	vOTU028812	66582	No	1	100	0	DTR (high-confidence)
SRR20661410	contig066993	vOTU028813	39129	No	1	100	0	DTR (high-confidence)
SRR20661410	contig066994	vOTU028814	43544	No	2	100	0	AAI-based (high-confidence)
SRR20661410	contig067010	vOTU028821	87368	No	2	100	0	AAI-based (high-confidence)
SRR20661410	contig067025	vOTU063031	42054	No	1	100	0	DTR (high-confidence)
SRR20661411	contig067071	vOTU028836	40329	No	1	100	0	DTR (high-confidence)
SRR20661411	contig067112	vOTU028844	51933	No	1	100	0	DTR (high-confidence)
SRR20661411	contig067116	vOTU028845	45332	No	2	100	0	AAI-based (high-confidence)
SRR20661411	contig067132	vOTU028852	60600	No	2	100	0	AAI-based (high-confidence)
SRR20661411	contig067146	vOTU028857	127580	No	1	100	0	DTR (high-confidence)
SRR20661411	contig067149	vOTU028859	72718	No	1	100	0	DTR (high-confidence)
SRR20661411	contig067181	vOTU028877	143027	No	2	100	0	AAI-based (high-confidence)
SRR20661411	contig067192	vOTU028882	104399	No	1	100	0	DTR (high-confidence)
SRR20661411	contig067217	vOTU108207	88840	No	1	100	0	DTR (high-confidence)
SRR20661411	contig067260	vOTU028918	35652	No	2	100	0	AAI-based (high-confidence)
SRR20661411	contig067274	vOTU028925	52535	No	1	100	0	DTR (high-confidence)
SRR20661411	contig067292	vOTU028934	64544	No	2	100	0	AAI-based (high-confidence)
SRR20661411	contig067322	vOTU029742	6426	No	1	100	0	DTR (high-confidence)
SRR20661411	contig067324	vOTU028946	133303	No	1	100	0	DTR (medium-confidence)
SRR20661412	contig067332	vOTU028948	43644	No	1	100	0	DTR (high-confidence)
SRR20661411	contig067354	vOTU028957	97301	No	1	100	0	DTR (high-confidence)
SRR20661411	contig067356	vOTU029760	45649	No	1	100	0	DTR (high-confidence)
SRR20661411	contig067360	vOTU028959	182652	No	1	100	0	DTR (high-confidence)
SRR20661411	contig067362	vOTU028960	32491	No	1	100	0	DTR (high-confidence)
SRR20661411	contig067363	vOTU028961	35868	No	2	100	0	AAI-based (high-confidence)
SRR20661412	contig067376	vOTU031106	80831	No	1	100	0	DTR (high-confidence)
SRR20661412	contig067381	vOTU028967	68282	No	1	100	0	DTR (high-confidence)
SRR20661412	contig067392	vOTU028972	90090	No	1	100	0	DTR (high-confidence)
SRR20661412	contig067443	vOTU028993	117795	No	1	100	0	DTR (high-confidence)
SRR20661412	contig067464	vOTU029002	43400	No	1	100	0	DTR (high-confidence)
SRR20661412	contig067489	vOTU029269	81293	No	1	100	0	DTR (high-confidence)
SRR20661412	contig067497	vOTU029016	166893	No	1	100	0	DTR (high-confidence)
SRR20661412	contig067503	vOTU029165	173873	No	2	100	0	AAI-based (medium-confidence)
SRR20661412	contig067514	vOTU029021	61644	No	2	100	0	AAI-based (medium-confidence)
SRR20661412	contig067557	vOTU029964	88689	No	2	100	0	AAI-based (high-confidence)
SRR20661412	contig067583	vOTU029055	83982	No	2	100	0	AAI-based (high-confidence)
SRR20661412	contig067590	vOTU029059	115928	No	1	100	0	ITR (high-confidence)
SRR20661412	contig067607	vOTU029068	39527	No	1	100	0	ITR (high-confidence)
SRR20661412	contig067614	vOTU029073	50129	No	1	100	0	DTR (high-confidence)
SRR20661412	contig067615	vOTU115631	226210	No	1	100	0	DTR (medium-confidence)
SRR20661413	contig067660	vOTU029090	35910	No	2	100	0	AAI-based (medium-confidence)
SRR20661413	contig067677	vOTU029097	35082	No	2	100	0	AAI-based (medium-confidence)
SRR20661413	contig067687	vOTU029101	39256	No	1	100	0	DTR (high-confidence)
SRR20661413	contig067707	vOTU031224	61653	No	2	100	0	AAI-based (medium-confidence)
SRR20661413	contig067847	vOTU063277	44251	No	1	100	0	DTR (high-confidence)
SRR20661414	contig067851	vOTU029148	146153	No	1	100	0	DTR (high-confidence)
SRR20661414	contig067864	vOTU029152	130287	No	1	100	0	DTR (high-confidence)
SRR20661413	contig067876	vOTU029155	58921	No	1	100	0	DTR (high-confidence)
SRR20661413	contig067879	vOTU029157	32706	No	1	100	0	DTR (high-confidence)
SRR20661414	contig067891	vOTU029164	205533	No	1	100	0	DTR (high-confidence)
SRR20661414	contig067908	vOTU029173	154486	No	2	100	0	AAI-based (medium-confidence)
SRR20661414	contig067996	vOTU029209	24883	No	1	100	0	DTR (high-confidence)
SRR20661414	contig068026	vOTU029221	117907	No	1	100	0	DTR (high-confidence)
SRR20661414	contig068029	vOTU029223	60065	No	1	100	0	DTR (high-confidence)
SRR20661414	contig068069	vOTU029236	49843	No	2	100	0	AAI-based (medium-confidence)
SRR20661414	contig068074	vOTU029238	35007	No	2	100	0	AAI-based (high-confidence)
SRR20661414	contig068101	vOTU029249	86312	No	2	100	0	AAI-based (medium-confidence)
SRR20661414	contig068110	vOTU037452	51202	No	1	100	0	DTR (medium-confidence)
SRR20661414	contig068151	vOTU029272	58769	No	1	100	0	DTR (high-confidence)
SRR20661414	contig068160	vOTU029276	163264	No	1	100	0	DTR (high-confidence)
SRR20661414	contig068170	vOTU029281	77922	No	1	100	0	DTR (high-confidence)
SRR20661414	contig068175	vOTU029282	43419	No	1	100	0	DTR (high-confidence)
SRR20661414	contig068191	vOTU029288	86754	No	1	100	0	DTR (high-confidence)
SRR20661414	contig068211	vOTU029298	59761	No	1	100	0	DTR (high-confidence)
SRR20661414	contig068229	vOTU029305	63413	No	2	100	0	AAI-based (medium-confidence)
SRR20661414	contig068267	vOTU029322	363855	No	1	100	0	DTR (high-confidence)
SRR20661414	contig068280	vOTU029327	41991	No	2	100	0	AAI-based (high-confidence)
SRR20661414	contig068307	vOTU029340	100536	No	1	100	0	DTR (high-confidence)
SRR20661414	contig068309	vOTU029341	36453	No	1	100	0	DTR (high-confidence)
SRR20661414	contig068311	vOTU029342	48226	No	1	100	0	DTR (high-confidence)
SRR20661414	contig068313	vOTU029588	68785	No	1	100	0	DTR (high-confidence)
SRR20661414	contig068314	vOTU029344	32555	No	1	100	0	DTR (medium-confidence)
SRR20661414	contig068316	vOTU111372	48181	No	1	100	0	DTR (high-confidence)
SRR20661415	contig068317	vOTU063063	44387	No	2	100	0	AAI-based (medium-confidence)
SRR20661414	contig068334	vOTU029354	131377	No	2	100	0	AAI-based (medium-confidence)
SRR20661414	contig068335	vOTU107076	91984	No	1	100	0	DTR (medium-confidence)
SRR20661414	contig068344	vOTU029360	41175	No	1	100	0	DTR (high-confidence)
SRR20661414	contig068346	vOTU029362	46765	No	1	100	0	DTR (high-confidence)
SRR20661414	contig068350	vOTU029365	12627	No	2	100	0	AAI-based (medium-confidence)
SRR20661414	contig068351	vOTU029366	146132	No	1	100	0	DTR (medium-confidence)
SRR20661414	contig068353	vOTU029368	38436	No	1	100	0	DTR (high-confidence)
SRR20661414	contig068361	vOTU029371	53466	No	2	100	0	AAI-based (medium-confidence)
SRR20661414	contig068362	vOTU029372	220701	No	1	100	0	DTR (high-confidence)
SRR20661414	contig068363	vOTU031030	98390	No	1	100	0	DTR (high-confidence)
SRR20661414	contig068364	vOTU029373	102851	No	1	100	0	DTR (high-confidence)
SRR20661414	contig068365	vOTU029374	6384	No	1	100	0	DTR (high-confidence)
SRR20661414	contig068366	vOTU029375	42741	No	1	100	0	DTR (high-confidence)
SRR20661414	contig068368	vOTU029376	60516	No	1	100	0	DTR (high-confidence)
SRR20661414	contig068369	vOTU029377	50095	No	1	100	0	DTR (high-confidence)
SRR20661414	contig068370	vOTU029378	6286	No	1	100	0	DTR (high-confidence)
SRR20661414	contig068371	vOTU029379	49705	No	1	100	0	DTR (high-confidence)
SRR20661415	contig068397	vOTU029390	32571	No	1	100	0	DTR (high-confidence)
SRR20661415	contig068468	vOTU029417	10816	No	2	100	0	AAI-based (high-confidence)
SRR20661415	contig068535	vOTU029440	110344	No	2	100	0	AAI-based (high-confidence)
SRR20661415	contig068578	vOTU029456	6366	No	1	100	0	DTR (high-confidence)
SRR20661415	contig068579	vOTU029726	78210	No	1	100	0	DTR (high-confidence)
SRR20661415	contig068580	vOTU029457	32616	No	1	100	0	DTR (medium-confidence)
SRR20661415	contig068582	vOTU030855	132903	No	1	100	0	DTR (high-confidence)
SRR20661416	contig068615	vOTU029470	48870	No	1	100	0	DTR (high-confidence)
SRR20661416	contig068655	vOTU029484	106561	No	1	100	0	DTR (high-confidence)
SRR20661416	contig068659	vOTU029485	45727	No	1	100	0	DTR (high-confidence)
SRR20661416	contig068674	vOTU029492	39364	No	2	100	0	AAI-based (high-confidence)
SRR20661416	contig068702	vOTU029501	62416	No	2	100	0	AAI-based (medium-confidence)
SRR20661416	contig068736	vOTU029518	48134	No	2	100	0	AAI-based (medium-confidence)
SRR20661416	contig068754	vOTU030337	72151	No	1	100	0	DTR (high-confidence)
SRR20661416	contig068791	vOTU029547	37326	No	1	100	0	DTR (high-confidence)
SRR20661416	contig068828	vOTU029565	37458	No	2	100	0	AAI-based (high-confidence)
SRR20661416	contig068829	vOTU029566	27431	No	1	100	0	DTR (medium-confidence)
SRR20661416	contig068901	vOTU029607	34971	No	1	100	0	DTR (medium-confidence)
SRR20661416	contig068939	vOTU029624	49281	No	2	100	0	AAI-based (medium-confidence)
SRR20661416	contig068941	vOTU029626	109533	No	1	100	0	DTR (high-confidence)
SRR20661416	contig068975	vOTU029643	58206	No	2	100	0	AAI-based (medium-confidence)
SRR20661416	contig068992	vOTU029652	45599	No	1	100	0	DTR (high-confidence)
SRR20661416	contig068999	vOTU029655	68756	No	1	100	0	DTR (high-confidence)
SRR20661416	contig069003	vOTU029657	14538	No	2	100	0	AAI-based (medium-confidence)
SRR20661416	contig069009	vOTU029659	26144	No	2	100	0	AAI-based (high-confidence)
SRR20661416	contig069023	vOTU029667	16214	No	1	100	0	ITR (medium-confidence)
SRR20661416	contig069037	vOTU030999	61848	No	2	100	0	AAI-based (medium-confidence)
SRR20661416	contig069066	vOTU099438	43948	No	1	100	0	DTR (high-confidence)
SRR20661416	contig069068	vOTU029689	94885	No	1	100	0	DTR (high-confidence)
SRR20661416	contig069069	vOTU029690	22619	No	1	100	0	DTR (high-confidence)
SRR20661416	contig069070	vOTU030564	44777	No	1	100	0	DTR (high-confidence)
SRR20661416	contig069096	vOTU029703	52150	No	2	100	0	AAI-based (medium-confidence)
SRR20661416	contig069102	vOTU029707	63491	No	1	100	0	DTR (medium-confidence)
SRR20661416	contig069104	vOTU029708	129776	No	1	100	0	DTR (medium-confidence)
SRR20661416	contig069112	vOTU029713	98339	No	1	100	0	DTR (high-confidence)
SRR20661417	contig069123	vOTU029719	104879	No	1	100	0	DTR (high-confidence)
SRR20661417	contig069127	vOTU029721	57735	No	1	100	0	DTR (high-confidence)
SRR20661417	contig069128	vOTU029722	146386	No	2	100	0	AAI-based (high-confidence)
SRR20661417	contig069160	vOTU029730	37410	No	2	100	0	AAI-based (medium-confidence)
SRR20661417	contig069177	vOTU030971	36882	No	1	100	0	DTR (high-confidence)
SRR20661417	contig069223	vOTU063048	50714	No	1	100	0	DTR (medium-confidence)
SRR20661417	contig069234	vOTU029764	161206	No	2	100	0	AAI-based (high-confidence)
SRR20661417	contig069262	vOTU029769	104908	No	2	100	0	AAI-based (high-confidence)
SRR20661417	contig069279	vOTU029774	47504	No	2	100	0	AAI-based (medium-confidence)
SRR20661417	contig069297	vOTU029784	39713	No	1	100	0	DTR (medium-confidence)
SRR20661417	contig069299	vOTU029785	111180	No	2	100	0	AAI-based (medium-confidence)
SRR20661417	contig069319	vOTU029797	62112	Yes	2	100	4.71	AAI-based (high-confidence)
SRR20661417	contig069353	vOTU029808	52619	No	1	100	0	DTR (high-confidence)
SRR20661417	contig069355	vOTU029809	6570	No	1	100	0	DTR (high-confidence)
SRR20661418	contig069401	vOTU031295	100371	No	1	100	0	DTR (high-confidence)
SRR20661418	contig069415	vOTU029834	44778	No	1	100	0	DTR (high-confidence)
SRR20661418	contig069418	vOTU029835	41915	No	1	100	0	DTR (high-confidence)
SRR20661418	contig069431	vOTU031085	170298	No	1	100	0	DTR (high-confidence)
SRR20661418	contig069473	vOTU029866	61793	No	2	100	0	AAI-based (medium-confidence)
SRR20661418	contig069496	vOTU029874	185611	No	2	100	0	AAI-based (medium-confidence)
SRR20661418	contig069521	vOTU029886	35914	No	1	100	0	DTR (medium-confidence)
SRR20661418	contig069562	vOTU029902	45439	No	1	100	0	DTR (high-confidence)
SRR20661418	contig069577	vOTU029910	133429	No	1	100	0	DTR (medium-confidence)
SRR20661418	contig069581	vOTU120392	36277	No	1	100	0	DTR (high-confidence)
SRR20661418	contig069582	vOTU029912	36187	No	1	100	0	DTR (high-confidence)
SRR20661418	contig069584	vOTU029913	38379	No	1	100	0	DTR (high-confidence)
SRR20661418	contig069585	vOTU029183	69924	No	1	100	0	DTR (medium-confidence)
SRR20661418	contig069592	vOTU029917	170369	No	2	100	0	AAI-based (medium-confidence)
SRR20661419	contig069634	vOTU029938	52486	No	2	100	0	AAI-based (high-confidence)
SRR20661419	contig069658	vOTU029954	17416	No	1	100	0	ITR (high-confidence)
SRR20661419	contig069697	vOTU029978	20724	No	2	100	0	AAI-based (medium-confidence)
SRR20661419	contig069712	vOTU029988	34514	No	2	100	0	AAI-based (medium-confidence)
SRR20661419	contig069732	vOTU030000	53935	No	2	100	0	AAI-based (medium-confidence)
SRR20661419	contig069762	vOTU030012	243486	No	1	100	0	DTR (high-confidence)
SRR20661420	contig069770	vOTU030016	35184	No	2	100	0	AAI-based (medium-confidence)
SRR20661420	contig069808	vOTU030027	35974	No	2	100	0	AAI-based (high-confidence)
SRR20661421	contig069905	vOTU030052	46795	No	2	100	0	AAI-based (high-confidence)
SRR20661421	contig069942	vOTU030066	50345	No	2	100	0	AAI-based (high-confidence)
SRR20661422	contig069970	vOTU030077	34405	No	1	100	0	DTR (high-confidence)
SRR20661423	contig070021	vOTU030101	98730	No	1	100	0	DTR (high-confidence)
SRR20661423	contig070040	vOTU030113	45022	No	1	100	0	DTR (high-confidence)
SRR20661423	contig070056	vOTU030121	66165	No	2	100	0	AAI-based (medium-confidence)
SRR20661423	contig070065	vOTU030128	140752	No	1	100	0	DTR (high-confidence)
SRR20661423	contig070122	vOTU030157	91693	No	2	100	0	AAI-based (high-confidence)
SRR20661423	contig070129	vOTU030158	86418	No	2	100	0	AAI-based (medium-confidence)
SRR20661423	contig070140	vOTU030163	20790	No	2	100	0	AAI-based (medium-confidence)
SRR20661423	contig070149	vOTU030167	39924	No	2	100	0	AAI-based (medium-confidence)
SRR20661423	contig070173	vOTU030182	42669	No	1	100	0	DTR (high-confidence)
SRR20661423	contig070192	vOTU063096	34937	No	1	100	0	DTR (high-confidence)
SRR20661423	contig070193	vOTU030191	53400	No	1	100	0	DTR (medium-confidence)
SRR20661423	contig070194	vOTU030192	96241	No	1	100	0	DTR (high-confidence)
SRR20661424	contig070287	vOTU030233	41815	No	2	100	0	AAI-based (high-confidence)
SRR20661425	contig070334	vOTU030249	81345	No	1	100	0	DTR (high-confidence)
SRR20661425	contig070341	vOTU030253	43745	No	1	100	0	DTR (high-confidence)
SRR20661425	contig070351	vOTU030257	123527	No	1	100	0	ITR (high-confidence)
SRR20661425	contig070354	vOTU030723	34787	No	1	100	0	DTR (high-confidence)
SRR20661425	contig070366	vOTU030263	18601	No	1	100	0	ITR (high-confidence)
SRR20661425	contig070392	vOTU030274	38443	No	1	100	0	DTR (high-confidence)
SRR20661425	contig070413	vOTU030282	41036	No	1	100	0	DTR (high-confidence)
SRR20661425	contig070421	vOTU030286	55489	No	1	100	0	DTR (high-confidence)
SRR20661425	contig070423	vOTU030287	166475	No	1	100	0	DTR (high-confidence)
SRR20661425	contig070427	vOTU030288	101785	No	1	100	0	DTR (high-confidence)
SRR20661425	contig070443	vOTU030298	43897	No	1	100	0	DTR (high-confidence)
SRR20661425	contig070488	vOTU030321	55368	No	2	100	0	AAI-based (medium-confidence)
SRR20661425	contig070497	vOTU030329	36031	No	2	100	0	AAI-based (medium-confidence)
SRR20661425	contig070507	vOTU030335	162114	No	1	100	0	DTR (high-confidence)
SRR20661425	contig070514	vOTU030338	53753	No	2	100	0	AAI-based (medium-confidence)
SRR20661425	contig070532	vOTU030348	56646	No	2	100	0	AAI-based (high-confidence)
SRR20661425	contig070533	vOTU030349	70793	No	1	100	0	DTR (high-confidence)
SRR20661425	contig070560	vOTU030362	71326	No	1	100	0	DTR (high-confidence)
SRR20661425	contig070575	vOTU030371	70364	No	2	100	0	AAI-based (medium-confidence)
SRR20661425	contig070590	vOTU030377	53703	No	2	100	0	AAI-based (high-confidence)
SRR20661425	contig070598	vOTU030381	32245	No	1	100	0	DTR (high-confidence)
SRR20661425	contig070601	vOTU030383	138971	No	1	100	0	DTR (medium-confidence)
SRR20661425	contig070617	vOTU030390	61191	No	2	100	0	AAI-based (medium-confidence)
SRR20661425	contig070629	vOTU030395	258718	No	1	100	0	DTR (high-confidence)
SRR20661425	contig070630	vOTU030396	38634	No	1	100	0	DTR (medium-confidence)
SRR20661425	contig070633	vOTU030397	65604	No	1	100	0	DTR (high-confidence)
SRR20661425	contig070634	vOTU030398	38983	No	1	100	0	DTR (high-confidence)
SRR20661425	contig070635	vOTU030399	44181	No	1	100	0	DTR (high-confidence)
SRR20661426	contig070643	vOTU030402	39184	No	1	100	0	DTR (high-confidence)
SRR20661425	contig070657	vOTU030410	51961	No	1	100	0	DTR (high-confidence)
SRR20661426	contig070720	vOTU030435	72789	No	1	100	0	DTR (high-confidence)
SRR20661426	contig070939	vOTU030523	34209	No	1	100	0	DTR (high-confidence)
SRR20661426	contig070940	vOTU030524	46475	No	1	100	0	DTR (high-confidence)
SRR20661426	contig070943	vOTU030525	160109	No	1	100	0	DTR (medium-confidence)
SRR20661426	contig070960	vOTU030870	53108	No	1	100	0	DTR (high-confidence)
SRR20661426	contig070969	vOTU030536	61449	No	1	100	0	DTR (high-confidence)
SRR20661426	contig070971	vOTU030537	33511	No	1	100	0	DTR (high-confidence)
SRR20661427	contig071063	vOTU029635	16793	No	1	100	0	ITR (medium-confidence)
SRR20661427	contig071064	vOTU030571	158211	No	1	100	0	DTR (high-confidence)
SRR20661427	contig071114	vOTU030587	50042	No	1	100	0	DTR (high-confidence)
SRR20661427	contig071115	vOTU030588	44220	No	1	100	0	DTR (high-confidence)
SRR20661427	contig071147	vOTU030604	72859	No	1	100	0	DTR (high-confidence)
SRR20661427	contig071154	vOTU030609	46431	No	2	100	0	AAI-based (medium-confidence)
SRR20661427	contig071162	vOTU030613	11727	No	1	100	0	ITR (high-confidence)
SRR20661427	contig071227	vOTU030639	49930	No	1	100	0	DTR (medium-confidence)
SRR20661427	contig071242	vOTU030645	51538	No	1	100	0	DTR (high-confidence)
SRR20661427	contig071257	vOTU030652	63776	No	2	100	0	AAI-based (high-confidence)
SRR20661427	contig071356	vOTU030698	60557	No	2	100	0	AAI-based (medium-confidence)
SRR20661427	contig071361	vOTU030702	39633	No	1	100	0	DTR (high-confidence)
SRR20661427	contig071368	vOTU030706	40577	No	1	100	0	DTR (high-confidence)
SRR20661427	contig071390	vOTU030714	74214	No	1	100	0	DTR (high-confidence)
SRR20661427	contig071391	vOTU030715	77158	No	1	100	0	DTR (high-confidence)
SRR20661428	contig071458	vOTU030745	13867	No	2	100	0	AAI-based (high-confidence)
SRR20661428	contig071464	vOTU030749	40731	No	2	100	0	AAI-based (high-confidence)
SRR20661428	contig071480	vOTU030759	38968	No	1	100	0	DTR (high-confidence)
SRR20661429	contig071490	vOTU030764	54889	No	2	100	0	AAI-based (medium-confidence)
SRR20661428	contig071498	vOTU030768	50222	No	1	100	0	DTR (high-confidence)
SRR20661429	contig071528	vOTU030783	177735	No	2	100	0	AAI-based (medium-confidence)
SRR20661429	contig071612	vOTU030825	42659	No	2	100	0	AAI-based (high-confidence)
SRR20661430	contig071632	vOTU030833	28479	No	1	100	0	DTR (high-confidence)
SRR20661430	contig071642	vOTU030838	72971	No	1	100	0	DTR (high-confidence)
SRR20661430	contig071667	vOTU030851	78220	No	1	100	0	DTR (high-confidence)
SRR20661430	contig071756	vOTU030888	62791	No	2	100	0	AAI-based (medium-confidence)
SRR20661430	contig071868	vOTU030928	38660	No	1	100	0	DTR (high-confidence)
SRR20661430	contig071945	vOTU030960	50307	No	1	100	0	DTR (high-confidence)
SRR20661430	contig071974	vOTU030972	131792	No	1	100	0	DTR (medium-confidence)
SRR20661431	contig071980	vOTU031182	81755	No	2	100	0	AAI-based (high-confidence)
SRR20661431	contig072003	vOTU030988	31422	No	2	100	0	AAI-based (medium-confidence)
SRR20661431	contig072010	vOTU030991	86414	No	1	100	0	DTR (high-confidence)
SRR20661431	contig072056	vOTU031011	97226	Yes	2	100	3.73	AAI-based (high-confidence)
SRR20661431	contig072084	vOTU031026	53399	No	2	100	0	AAI-based (high-confidence)
SRR20661431	contig072099	vOTU031035	40594	No	2	100	0	AAI-based (high-confidence)
SRR20661431	contig072110	vOTU031041	47990	No	2	100	0	AAI-based (medium-confidence)
SRR20661431	contig072162	vOTU031064	44237	No	1	100	0	DTR (high-confidence)
SRR20661431	contig072202	vOTU031083	48116	No	2	100	0	AAI-based (medium-confidence)
SRR20661431	contig072210	vOTU031088	171918	No	2	100	0	AAI-based (high-confidence)
SRR20661431	contig072221	vOTU031093	55873	No	2	100	0	AAI-based (medium-confidence)
SRR20661431	contig072237	vOTU031101	48153	No	2	100	0	AAI-based (medium-confidence)
SRR20661431	contig072241	vOTU031104	97837	No	1	100	0	DTR (high-confidence)
SRR20661431	contig072248	vOTU031109	63849	No	1	100	0	DTR (high-confidence)
SRR20661431	contig072292	vOTU031128	61215	No	2	100	0	AAI-based (medium-confidence)
SRR20661431	contig072318	vOTU031139	34363	No	2	100	0	AAI-based (high-confidence)
SRR20661431	contig072324	vOTU031144	99746	No	1	100	0	DTR (high-confidence)
SRR20661431	contig072335	vOTU031148	114770	No	1	100	0	DTR (high-confidence)
SRR20661432	contig072402	vOTU031174	36076	No	2	100	0	AAI-based (high-confidence)
SRR20661432	contig072454	vOTU031197	7142	No	2	100	0	AAI-based (high-confidence)
SRR20661432	contig072539	vOTU031235	303598	No	1	100	0	DTR (high-confidence)
SRR20661432	contig072566	vOTU031245	41575	No	1	100	0	ITR (high-confidence)
SRR20661432	contig072576	vOTU063088	46540	No	2	100	0	AAI-based (high-confidence)
SRR20661432	contig072596	vOTU031262	65084	No	1	100	0	DTR (medium-confidence)
SRR20661432	contig072597	vOTU031263	75108	No	1	100	0	DTR (high-confidence)
SRR20661432	contig072624	vOTU031274	60759	No	2	100	0	AAI-based (medium-confidence)
SRR20661432	contig072630	vOTU031277	274529	No	1	100	0	DTR (high-confidence)
SRR20661432	contig072632	vOTU028635	151561	No	1	100	0	DTR (medium-confidence)
SRR20661432	contig072634	vOTU031279	46151	No	1	100	0	DTR (high-confidence)
SRR20661432	contig072635	vOTU031280	39820	No	1	100	0	DTR (high-confidence)
SRR20661432	contig072638	vOTU031282	52023	No	1	100	0	DTR (high-confidence)
SRR20661433	contig072654	vOTU031289	63309	Yes	2	100	3.24	AAI-based (medium-confidence)
SRR20661433	contig072863	vOTU031379	46355	No	2	100	0	AAI-based (medium-confidence)
SRR20661433	contig072877	vOTU031384	98400	No	1	100	0	DTR (high-confidence)
SRR21527943	contig072915	vOTU031410	39995	No	1	100	0	DTR (high-confidence)
SRR21527944	contig072956	vOTU031444	65629	No	2	100	0	AAI-based (medium-confidence)
SRR21527944	contig072996	vOTU031479	113094	No	1	100	0	DTR (high-confidence)
SRR21527944	contig072997	vOTU031480	232365	No	1	100	0	DTR (medium-confidence)
SRR21527944	contig073007	vOTU031490	42607	No	1	100	0	DTR (high-confidence)
SRR21527944	contig073008	vOTU031491	34812	No	1	100	0	DTR (medium-confidence)
SRR21527944	contig073009	vOTU031492	42830	No	1	100	0	DTR (high-confidence)
SRR21527945	contig073043	vOTU031517	62174	No	2	100	0	AAI-based (medium-confidence)
SRR21527945	contig073045	vOTU031519	140491	No	1	100	0	DTR (high-confidence)
SRR21527945	contig073050	vOTU031523	46945	No	1	100	0	DTR (high-confidence)
SRR21527946	contig073078	vOTU031546	41758	No	2	100	0	AAI-based (high-confidence)
SRR21527946	contig073100	vOTU031568	34450	No	2	100	0	AAI-based (medium-confidence)
SRR21527946	contig073111	vOTU031578	40815	No	1	100	0	DTR (high-confidence)
SRR21527946	contig073120	vOTU031586	35963	No	1	100	0	DTR (high-confidence)
SRR21527947	contig073136	vOTU031599	37201	No	1	100	0	DTR (high-confidence)
SRR21527947	contig073148	vOTU031610	42753	No	2	100	0	AAI-based (high-confidence)
SRR21527947	contig073154	vOTU031616	83550	No	2	100	0	AAI-based (medium-confidence)
SRR21527947	contig073156	vOTU031618	64414	No	2	100	0	AAI-based (high-confidence)
SRR21527947	contig073158	vOTU031620	41136	No	2	100	0	AAI-based (medium-confidence)
SRR21527947	contig073169	vOTU031631	41126	No	2	100	0	AAI-based (medium-confidence)
SRR21527947	contig073176	vOTU031638	66079	No	1	100	0	DTR (high-confidence)
SRR21527947	contig073190	vOTU031652	37571	No	1	100	0	DTR (high-confidence)
SRR21527948	contig073214	vOTU031673	267956	No	2	100	0	AAI-based (high-confidence)
SRR21527948	contig073238	vOTU031687	38426	No	1	100	0	DTR (medium-confidence)
SRR21527948	contig073261	vOTU031708	39191	No	1	100	0	DTR (high-confidence)
SRR21527948	contig073262	vOTU031709	67482	No	1	100	0	DTR (high-confidence)
SRR21527956	contig073283	vOTU031728	68141	No	1	100	0	DTR (high-confidence)
SRR21527956	contig073289	vOTU031732	147328	No	2	100	0	AAI-based (medium-confidence)
SRR21527956	contig073292	vOTU031735	64779	No	2	100	0	AAI-based (high-confidence)
SRR21527956	contig073318	vOTU031761	43725	No	2	100	0	AAI-based (medium-confidence)
SRR21527956	contig073374	vOTU031813	52641	No	1	100	0	DTR (high-confidence)
SRR21527956	contig073375	vOTU031814	40050	No	1	100	0	DTR (high-confidence)
SRR21527956	contig073379	vOTU031818	39139	No	1	100	0	DTR (high-confidence)
SRR21527956	contig073383	vOTU031822	36376	No	2	100	0	AAI-based (high-confidence)
SRR21527956	contig073391	vOTU056184	51076	No	1	100	0	DTR (high-confidence)
SRR21527956	contig073392	vOTU031828	95818	No	1	100	0	DTR (high-confidence)
SRR21527956	contig073397	vOTU031833	53993	No	2	100	0	AAI-based (high-confidence)
SRR21527968	contig073435	vOTU031865	308367	No	1	100	0	DTR (high-confidence)
SRR21527968	contig073457	vOTU031887	50497	No	1	100	0	DTR (high-confidence)
SRR21527968	contig073499	vOTU031925	84328	No	1	100	0	DTR (high-confidence)
SRR21527968	contig073500	vOTU031926	135624	No	1	100	0	DTR (high-confidence)
SRR26965292	contig073516	vOTU031941	37740	No	1	100	0	DTR (high-confidence)
SRR26965292	contig073519	vOTU031944	32532	No	1	100	0	DTR (high-confidence)
SRR26965292	contig073522	vOTU031947	94443	No	2	100	0	AAI-based (medium-confidence)
SRR26965292	contig073525	vOTU031950	64664	No	1	100	0	DTR (high-confidence)
SRR21527968	contig073533	vOTU031958	61300	No	1	100	0	DTR (high-confidence)
SRR21527968	contig073534	vOTU031959	42161	No	1	100	0	DTR (high-confidence)
SRR26965292	contig073540	vOTU031965	38567	No	1	100	0	DTR (high-confidence)
SRR26965292	contig073542	vOTU031967	43807	No	1	100	0	DTR (high-confidence)
SRR26965292	contig073548	vOTU031973	40899	No	1	100	0	DTR (high-confidence)
SRR26965292	contig073562	vOTU031986	45157	No	1	100	0	DTR (high-confidence)
SRR26965292	contig073566	vOTU031989	40698	No	1	100	0	DTR (high-confidence)
SRR26965292	contig073567	vOTU031990	41218	No	2	100	0	AAI-based (medium-confidence)
SRR26965292	contig073569	vOTU031992	42599	No	1	100	0	DTR (high-confidence)
SRR26965292	contig073574	vOTU031997	20600	No	1	100	0	DTR (high-confidence)
SRR26965292	contig073576	vOTU031999	38307	No	1	100	0	DTR (high-confidence)
SRR26965292	contig073586	vOTU032009	44347	No	1	100	0	DTR (high-confidence)
SRR26965292	contig073592	vOTU032015	39991	No	2	100	0	AAI-based (high-confidence)
SRR26965292	contig073605	vOTU032028	64471	No	1	100	0	DTR (medium-confidence)
SRR26965292	contig073606	vOTU032029	86152	No	2	100	0	AAI-based (medium-confidence)
SRR26965292	contig073613	vOTU032036	54222	No	2	100	0	AAI-based (high-confidence)
SRR26965292	contig073616	vOTU032039	41388	No	2	100	0	AAI-based (high-confidence)
SRR26965292	contig073620	vOTU032043	58070	No	2	100	0	AAI-based (medium-confidence)
SRR26965292	contig073627	vOTU032050	58489	No	2	100	0	AAI-based (medium-confidence)
SRR26965292	contig073636	vOTU032059	41775	No	2	100	0	AAI-based (medium-confidence)
SRR26965292	contig073665	vOTU032088	37985	No	1	100	0	DTR (high-confidence)
SRR26965292	contig073698	vOTU032120	85205	No	1	100	0	DTR (high-confidence)
SRR26965292	contig073705	vOTU032127	44430	No	2	100	0	AAI-based (medium-confidence)
SRR26965292	contig073728	vOTU032150	42222	No	1	100	0	DTR (high-confidence)
SRR26965292	contig073754	vOTU032176	79152	No	1	100	0	DTR (high-confidence)
SRR26965292	contig073766	vOTU032188	72156	No	1	100	0	DTR (high-confidence)
SRR26965292	contig073776	vOTU032198	58775	No	2	100	0	AAI-based (medium-confidence)
SRR26965292	contig073786	vOTU032208	64943	No	1	100	0	DTR (high-confidence)
SRR26965292	contig073794	vOTU032216	53116	No	2	100	0	AAI-based (high-confidence)
SRR26965292	contig073817	vOTU032239	62148	No	2	100	0	AAI-based (medium-confidence)
SRR26965292	contig073818	vOTU032240	43551	No	2	100	0	AAI-based (high-confidence)
SRR26965292	contig073833	vOTU032255	41903	No	1	100	0	DTR (high-confidence)
SRR26965292	contig073834	vOTU032256	39120	No	2	100	0	AAI-based (medium-confidence)
SRR26965292	contig073851	vOTU032273	47073	No	1	100	0	DTR (high-confidence)
SRR26965292	contig073853	vOTU032275	33860	No	1	100	0	DTR (high-confidence)
SRR26965292	contig073854	vOTU032276	43598	No	1	100	0	DTR (high-confidence)
SRR26965292	contig073879	vOTU032294	38825	No	1	100	0	DTR (high-confidence)
SRR26965292	contig073881	vOTU032296	45192	No	1	100	0	DTR (medium-confidence)
SRR26965293	contig073909	vOTU032310	56223	No	2	100	0	AAI-based (medium-confidence)
SRR26965293	contig073924	vOTU032318	50226	No	2	100	0	AAI-based (high-confidence)
SRR26965294	contig074010	vOTU032360	25348	No	2	100	0	AAI-based (medium-confidence)
SRR26974994	contig074028	vOTU032376	39703	No	2	100	0	AAI-based (medium-confidence)
SRR26974994	contig074090	vOTU032422	39261	No	1	100	0	DTR (high-confidence)
SRR26974994	contig074102	vOTU032432	39582	No	2	100	0	AAI-based (medium-confidence)
SRR26974994	contig074115	vOTU032440	14899	No	1	100	0	DTR (high-confidence)
SRR26974994	contig074152	vOTU032470	37678	No	2	100	0	AAI-based (high-confidence)
SRR26974994	contig074173	vOTU032487	58469	No	1	100	0	DTR (high-confidence)
SRR26974994	contig074183	vOTU032495	19563	No	2	100	0	AAI-based (medium-confidence)
SRR26974995	contig074272	vOTU032564	45931	No	1	100	0	DTR (high-confidence)
SRR26974995	contig074275	vOTU032567	146817	No	1	100	0	DTR (high-confidence)
SRR26974995	contig074284	vOTU032576	45884	No	2	100	0	AAI-based (medium-confidence)
SRR26974995	contig074296	vOTU032588	88477	Yes	1	100	4.35	DTR (high-confidence)
SRR26974995	contig074307	vOTU032599	38855	No	1	100	0	DTR (high-confidence)
SRR26974995	contig074327	vOTU032619	47768	No	2	100	0	AAI-based (medium-confidence)
SRR26974995	contig074330	vOTU032622	106890	No	1	100	0	DTR (high-confidence)
SRR26974995	contig074338	vOTU032630	44045	No	2	100	0	AAI-based (high-confidence)
SRR26974995	contig074349	vOTU032641	42928	No	2	100	0	AAI-based (medium-confidence)
SRR26974995	contig074353	vOTU032645	62779	No	2	100	0	AAI-based (high-confidence)
SRR26974995	contig074480	vOTU032772	37058	No	1	100	0	DTR (high-confidence)
SRR26974995	contig074530	vOTU032822	35763	No	1	100	0	DTR (high-confidence)
SRR26974995	contig074580	vOTU032871	53194	No	1	100	0	DTR (high-confidence)
SRR26974995	contig074622	vOTU032913	37062	No	1	100	0	DTR (high-confidence)
SRR26974995	contig074635	vOTU032926	56188	No	1	100	0	DTR (high-confidence)
SRR26974995	contig074672	vOTU032963	59133	No	2	100	0	AAI-based (high-confidence)
SRR26974995	contig074746	vOTU033035	43870	No	1	100	0	DTR (high-confidence)
SRR26974995	contig074751	vOTU033040	82349	No	1	100	0	DTR (high-confidence)
SRR26974995	contig074813	vOTU033101	63742	No	2	100	0	AAI-based (high-confidence)
SRR26974995	contig074827	vOTU033115	48386	No	2	100	0	AAI-based (medium-confidence)
SRR26974995	contig074941	vOTU033228	44359	No	1	100	0	DTR (high-confidence)
SRR26974995	contig074956	vOTU033243	21877	No	2	100	0	AAI-based (medium-confidence)
SRR26974995	contig074968	vOTU033255	46845	No	2	100	0	AAI-based (medium-confidence)
SRR26974995	contig074997	vOTU033283	52009	No	1	100	0	DTR (high-confidence)
SRR26974995	contig075003	vOTU033289	56768	No	1	100	0	DTR (high-confidence)
SRR26974995	contig075065	vOTU033349	53302	No	1	100	0	DTR (high-confidence)
SRR26974995	contig075072	vOTU033356	67356	No	1	100	0	DTR (high-confidence)
SRR26974995	contig075121	vOTU033404	85754	No	1	100	0	DTR (high-confidence)
SRR26974995	contig075168	vOTU033449	57855	No	2	100	0	AAI-based (medium-confidence)
SRR26974995	contig075207	vOTU033488	34014	No	1	100	0	DTR (medium-confidence)
SRR26974995	contig075240	vOTU033521	38380	No	1	100	0	DTR (high-confidence)
SRR26974995	contig075244	vOTU033524	48890	No	2	100	0	AAI-based (high-confidence)
SRR26974995	contig075265	vOTU033544	42253	No	1	100	0	DTR (high-confidence)
SRR26974995	contig075300	vOTU033579	98295	No	1	100	0	DTR (high-confidence)
SRR26974995	contig075306	vOTU033585	55232	No	2	100	0	AAI-based (medium-confidence)
SRR26974995	contig075359	vOTU033638	64675	No	1	100	0	DTR (high-confidence)
SRR26974995	contig075377	vOTU033655	70635	No	2	100	0	AAI-based (medium-confidence)
SRR26974995	contig075437	vOTU033714	13017	No	2	100	0	AAI-based (medium-confidence)
SRR26974995	contig075467	vOTU033744	56657	No	2	100	0	AAI-based (high-confidence)
SRR26974995	contig075477	vOTU033754	40488	No	1	100	0	DTR (high-confidence)
SRR26974995	contig075505	vOTU033782	47917	No	2	100	0	AAI-based (medium-confidence)
SRR26974995	contig075585	vOTU033861	43189	No	2	100	0	AAI-based (medium-confidence)
SRR26974995	contig075589	vOTU033865	67699	No	2	100	0	AAI-based (medium-confidence)
SRR26974995	contig075596	vOTU033872	50370	No	1	100	0	DTR (high-confidence)
SRR26974995	contig075603	vOTU033879	75213	No	2	100	0	AAI-based (medium-confidence)
SRR26974995	contig075609	vOTU033885	85808	No	1	100	0	DTR (high-confidence)
SRR26974995	contig075673	vOTU033949	37474	No	2	100	0	AAI-based (high-confidence)
SRR26974995	contig075699	vOTU033974	36634	No	1	100	0	DTR (high-confidence)
SRR26974995	contig075702	vOTU033977	46641	No	2	100	0	AAI-based (high-confidence)
SRR26974995	contig075708	vOTU033983	34889	No	2	100	0	AAI-based (medium-confidence)
SRR26974995	contig075754	vOTU034028	38528	No	2	100	0	AAI-based (high-confidence)
SRR26974995	contig075801	vOTU034075	85887	No	1	100	0	DTR (high-confidence)
SRR26974995	contig075844	vOTU034118	42941	No	1	100	0	DTR (high-confidence)
SRR26974995	contig075864	vOTU034138	93215	No	2	100	0	AAI-based (medium-confidence)
SRR26974995	contig075893	vOTU034167	42862	No	1	100	0	DTR (high-confidence)
SRR26974995	contig075934	vOTU034208	38877	No	1	100	0	DTR (high-confidence)
SRR26974995	contig075959	vOTU034233	37267	No	1	100	0	DTR (high-confidence)
SRR26974995	contig075980	vOTU034253	79565	No	1	100	0	DTR (high-confidence)
SRR26974995	contig075981	vOTU034254	55805	No	1	100	0	DTR (high-confidence)
SRR26974995	contig076031	vOTU034303	66863	No	1	100	0	DTR (high-confidence)
SRR26974995	contig076034	vOTU034306	77398	No	1	100	0	DTR (high-confidence)
SRR26974995	contig076048	vOTU034320	48117	No	1	100	0	DTR (medium-confidence)
SRR26974995	contig076076	vOTU034345	42007	No	1	100	0	DTR (high-confidence)
SRR26974996	contig076091	vOTU034355	60892	No	1	100	0	DTR (high-confidence)
SRR26974996	contig076101	vOTU034363	15965	No	2	100	0	AAI-based (medium-confidence)
SRR26974996	contig076148	vOTU034396	16448	No	2	100	0	AAI-based (medium-confidence)
SRR27143223	contig076196	vOTU034432	283589	No	1	100	0	DTR (high-confidence)
SRR27143223	contig076225	vOTU034450	46976	No	1	100	0	DTR (high-confidence)
SRR27143223	contig076233	vOTU034453	40456	No	2	100	0	AAI-based (medium-confidence)
SRR27143223	contig076369	vOTU034545	49251	No	2	100	0	AAI-based (medium-confidence)
SRR27143226	contig076794	vOTU034837	90598	No	1	100	0	DTR (high-confidence)
SRR27143226	contig076803	vOTU034845	39229	No	1	100	0	DTR (high-confidence)
SRR27143226	contig076806	vOTU034847	229002	No	1	100	0	DTR (medium-confidence)
SRR27143226	contig076818	vOTU034859	13707	No	1	100	0	ITR (high-confidence)
SRR27143226	contig076860	vOTU034890	44908	No	2	100	0	AAI-based (high-confidence)
SRR27143226	contig076864	vOTU034893	17170	No	2	100	0	AAI-based (medium-confidence)
SRR27143226	contig076870	vOTU034897	40540	No	1	100	0	DTR (high-confidence)
SRR27143226	contig076898	vOTU034917	55296	No	1	100	0	DTR (high-confidence)
SRR27143226	contig076915	vOTU034930	58133	No	1	100	0	DTR (high-confidence)
SRR27143226	contig076923	vOTU034934	10243	No	1	100	0	ITR (medium-confidence)
SRR27143226	contig076959	vOTU034953	43098	No	2	100	0	AAI-based (medium-confidence)
SRR27143226	contig076971	vOTU034961	36919	No	1	100	0	DTR (medium-confidence)
SRR27143226	contig077046	vOTU035008	46199	No	1	100	0	DTR (high-confidence)
SRR27143226	contig077099	vOTU035042	41676	No	2	100	0	AAI-based (high-confidence)
SRR27143226	contig077124	vOTU035052	51908	No	1	100	0	DTR (high-confidence)
SRR27143226	contig077135	vOTU035062	32160	No	1	100	0	DTR (medium-confidence)
SRR27143226	contig077169	vOTU035080	36413	No	1	100	0	DTR (high-confidence)
SRR27143226	contig077186	vOTU035093	21007	No	2	100	0	AAI-based (high-confidence)
SRR27143226	contig077238	vOTU035126	7176	No	2	100	0	AAI-based (medium-confidence)
SRR27143226	contig077250	vOTU035428	19405	No	2	100	0	AAI-based (high-confidence)
SRR27143226	contig077256	vOTU035136	47607	No	2	100	0	AAI-based (medium-confidence)
SRR27143226	contig077264	vOTU035138	46954	No	1	100	0	DTR (high-confidence)
SRR27143226	contig077292	vOTU035151	11559	No	2	100	0	AAI-based (medium-confidence)
SRR27143226	contig077299	vOTU035154	49792	No	2	100	0	AAI-based (high-confidence)
SRR27143226	contig077324	vOTU035167	60153	No	1	100	0	DTR (high-confidence)
SRR27143226	contig077327	vOTU035169	128126	No	1	100	0	DTR (high-confidence)
SRR27143226	contig077373	vOTU035199	10021	No	1	100	0	ITR (medium-confidence)
SRR27143226	contig077444	vOTU035556	72272	No	2	100	0	AAI-based (medium-confidence)
SRR27143227	contig077553	vOTU035307	11672	No	2	100	0	AAI-based (medium-confidence)
SRR27143227	contig077596	vOTU035338	44014	No	1	100	0	DTR (high-confidence)
SRR27143227	contig077611	vOTU035350	36860	No	2	100	0	AAI-based (high-confidence)
SRR27143227	contig077624	vOTU035359	43766	No	1	100	0	DTR (high-confidence)
SRR27143227	contig077694	vOTU035400	75548	No	1	100	0	DTR (high-confidence)
SRR27143227	contig077698	vOTU035403	41741	No	1	100	0	DTR (medium-confidence)
SRR27143227	contig077733	vOTU035429	15038	No	2	100	0	AAI-based (high-confidence)
SRR27143227	contig077749	vOTU035616	61368	No	1	100	0	DTR (high-confidence)
SRR27143227	contig077750	vOTU035441	125251	No	2	100	0	AAI-based (medium-confidence)
SRR27143227	contig077766	vOTU035452	19258	No	2	100	0	AAI-based (high-confidence)
SRR27143227	contig077782	vOTU035081	10134	No	1	100	0	ITR (medium-confidence)
SRR27143227	contig077832	vOTU035494	69705	No	1	100	0	DTR (high-confidence)
SRR27143227	contig077838	vOTU035497	15050	No	1	100	0	DTR (high-confidence)
SRR27143227	contig077923	vOTU035555	44181	No	1	100	0	DTR (high-confidence)
SRR27143227	contig077936	vOTU035563	50153	No	1	100	0	DTR (high-confidence)
SRR27143228	contig078031	vOTU035636	40504	No	1	100	0	DTR (high-confidence)
SRR27143228	contig078216	vOTU035756	10040	No	1	100	0	ITR (medium-confidence)
SRR27143228	contig078431	vOTU035896	140365	No	2	100	0	AAI-based (high-confidence)
SRR27143228	contig078496	vOTU035937	257673	No	2	100	0	AAI-based (medium-confidence)
SRR27143229	contig078557	vOTU035978	76596	No	1	100	0	DTR (high-confidence)
SRR27143229	contig078565	vOTU063407	27312	No	1	100	0	DTR (medium-confidence)
SRR27143229	contig078585	vOTU035994	48178	No	1	100	0	DTR (high-confidence)
SRR27143229	contig078602	vOTU036005	45034	No	1	100	0	DTR (high-confidence)
SRR27143229	contig078628	vOTU036018	46313	No	1	100	0	DTR (high-confidence)
SRR27143229	contig078639	vOTU045377	43778	No	2	100	0	AAI-based (medium-confidence)
SRR27143229	contig078665	vOTU036041	48807	No	2	100	0	AAI-based (high-confidence)
SRR27143229	contig078671	vOTU036046	43505	No	2	100	0	AAI-based (high-confidence)
SRR27143229	contig078688	vOTU036053	39844	No	1	100	0	DTR (high-confidence)
SRR27143229	contig078689	vOTU036054	47073	No	2	100	0	AAI-based (high-confidence)
SRR27143229	contig078693	vOTU036058	79526	No	1	100	0	DTR (high-confidence)
SRR27143229	contig078732	vOTU036082	88153	No	2	100	0	AAI-based (high-confidence)
SRR27143229	contig078737	vOTU036083	55076	No	2	100	0	AAI-based (high-confidence)
SRR27143229	contig078767	vOTU036100	60451	No	2	100	0	AAI-based (medium-confidence)
SRR27143229	contig078784	vOTU036106	46848	No	2	100	0	AAI-based (medium-confidence)
SRR27143229	contig078792	vOTU036110	39945	No	1	100	0	DTR (high-confidence)
SRR27143229	contig078800	vOTU036116	37910	No	2	100	0	AAI-based (high-confidence)
SRR27143229	contig078815	vOTU036125	226273	No	1	100	0	DTR (medium-confidence)
SRR27143229	contig078882	vOTU036165	62030	No	2	100	0	AAI-based (medium-confidence)
SRR27143229	contig078913	vOTU036186	33288	No	2	100	0	AAI-based (medium-confidence)
SRR27143229	contig078936	vOTU036202	43604	No	2	100	0	AAI-based (high-confidence)
SRR27143229	contig078956	vOTU036214	109474	No	2	100	0	AAI-based (high-confidence)
SRR27143229	contig078963	vOTU034876	45238	No	2	100	0	AAI-based (medium-confidence)
SRR27143229	contig078991	vOTU036236	47948	No	1	100	0	DTR (high-confidence)
SRR27143230	contig079183	vOTU036353	11664	No	2	100	0	AAI-based (medium-confidence)
SRR27143230	contig079193	vOTU042835	12169	No	2	100	0	AAI-based (medium-confidence)
SRR27143230	contig079216	vOTU036372	12466	No	2	100	0	AAI-based (medium-confidence)
SRR27143231	contig079306	vOTU130547	14506	No	1	100	0	DTR (high-confidence)
SRR27143231	contig079351	vOTU036449	147863	No	1	100	0	DTR (high-confidence)
SRR27143231	contig079359	vOTU036455	44773	No	1	100	0	DTR (high-confidence)
SRR27143231	contig079364	vOTU036457	48217	No	1	100	0	DTR (high-confidence)
SRR27143231	contig079376	vOTU038729	14745	No	1	100	0	DTR (high-confidence)
SRR27143231	contig079426	vOTU036493	45232	No	1	100	0	DTR (high-confidence)
SRR27143231	contig079462	vOTU036516	40408	No	1	100	0	DTR (high-confidence)
SRR27143231	contig079514	vOTU036547	40602	No	1	100	0	DTR (high-confidence)
SRR27143231	contig079567	vOTU046355	11310	No	1	100	0	DTR (high-confidence)
SRR27143231	contig079594	vOTU036591	357130	No	1	100	0	DTR (high-confidence)
SRR27143231	contig079603	vOTU036596	14564	No	1	100	0	DTR (high-confidence)
SRR27143231	contig079625	vOTU036609	58754	No	1	100	0	DTR (high-confidence)
SRR27143231	contig079723	vOTU036669	57926	No	1	100	0	DTR (high-confidence)
SRR27143232	contig079785	vOTU036695	41480	No	1	100	0	DTR (high-confidence)
SRR27143232	contig079838	vOTU036728	37090	No	1	100	0	DTR (high-confidence)
SRR27143232	contig080019	vOTU036836	47894	No	2	100	0	AAI-based (high-confidence)
SRR27143232	contig080099	vOTU036875	15138	No	1	100	0	DTR (high-confidence)
SRR27143233	contig080164	vOTU036908	39877	No	1	100	0	DTR (high-confidence)
SRR27143233	contig080236	vOTU036950	40544	No	1	100	0	DTR (high-confidence)
SRR27143233	contig080320	vOTU036998	43334	No	1	100	0	DTR (high-confidence)
[truncated: 59,610 more rows]
