# Supplementary material for: Global Characterization of the Avian Gut Virome Reveals Extensive Viral Diversity and Functional Implications
Source: Research Square preprint supplement (doi:10.21203/rs.3.rs-6913311/v1), 2025-10-16
Supplement: Supplementary file 3 [file 1816e8647e44a70f5a178be6.xlsx]

## Sheet: Supplementary table 9
Supplementary Table S9: Putative AMGs detected in identified vOTUs based on VIBRANT and DRAM-v.
contig_id	vOTU_id	protein_id	dbid	db_desc	orf_id	scaffold	auxiliary_score	amg_flags	module	sheet	header
contig000058	vOTU000028	contig000058_6	K01520	dUTP pyrophosphatase [EC:3.6.1.23] [RN:R02100]	contig000058-cat_1_6	contig000058-cat_1	2	MF	Pyrimidine deoxyribonuleotide biosynthesis, CDP/CTP => dCDP/dCTP,dTDP/dTTP	MISC	Information systems
contig000062	vOTU000031	contig000062_2	K00558	DNA (cytosine-5-)-methyltransferase [EC:2.1.1.37] [RN:R04858]	contig000062-cat_1_2	contig000062-cat_1	2	MF	Methionine degradation	Organic Nitrogen	Amino Acid
contig000077	vOTU000039	contig000077_6	K01520	dUTP pyrophosphatase [EC:3.6.1.23] [RN:R02100]	contig000077-cat_1_6	contig000077-cat_1	2	MF	Pyrimidine deoxyribonuleotide biosynthesis, CDP/CTP => dCDP/dCTP,dTDP/dTTP	MISC	Information systems
contig000078	vOTU000040	contig000078_72	K00560	thymidylate synthase [EC:2.1.1.45] [RN:R02101]	contig000078-cat_1_72	contig000078-cat_1	2	M	Pyrimidine deoxyribonuleotide biosynthesis, CDP/CTP => dCDP/dCTP,dTDP/dTTP	MISC	Information systems
contig000120	vOTU000053	contig000120_40	K00560	thymidylate synthase [EC:2.1.1.45] [RN:R02101]	contig000120-cat_1_40	contig000120-cat_1	1	M	Pyrimidine deoxyribonuleotide biosynthesis, CDP/CTP => dCDP/dCTP,dTDP/dTTP	MISC	Information systems
contig000193	vOTU000080	contig000193_33	K21636	ribonucleoside-triphosphate reductase [EC:1.17.4.2 1.1.98.6] [RN:R02022 R11636]	contig000193-cat_1_33	contig000193-cat_1	2	M	Pyrimidine deoxyribonuleotide biosynthesis, CDP/CTP => dCDP/dCTP,dTDP/dTTP	MISC	Information systems
contig000193	vOTU000080	contig000193_52	K01520	dUTP pyrophosphatase [EC:3.6.1.23] [RN:R02100]	contig000193-cat_1_52	contig000193-cat_1	2	M	Pyrimidine deoxyribonuleotide biosynthesis, CDP/CTP => dCDP/dCTP,dTDP/dTTP	MISC	Information systems
contig000196	vOTU108632	contig000196_32	K00558	DNA (cytosine-5-)-methyltransferase [EC:2.1.1.37] [RN:R04858]	contig000196-cat_1_32	contig000196-cat_1	1	M	Methionine degradation	Organic Nitrogen	Amino Acid
contig000248	vOTU000099	contig000248_9	K01939	adenylosuccinate synthase [EC:6.3.4.4] [RN:R01135]	contig000248-cat_1_9	contig000248-cat_1	2	M	Adenine ribonucleotide biosynthesis, IMP => ADP,ATP	MISC	Information systems
contig000248	vOTU000099	contig000248_28	K01520	dUTP pyrophosphatase [EC:3.6.1.23] [RN:R02100]	contig000248-cat_1_28	contig000248-cat_1	2	M	Pyrimidine deoxyribonuleotide biosynthesis, CDP/CTP => dCDP/dCTP,dTDP/dTTP	MISC	Information systems
contig000306	vOTU000125	contig000306_55	K01494	dCTP deaminase [EC:3.5.4.13] [RN:R02325]	contig000306-cat_1_55	contig000306-cat_1	2	M	Pyrimidine deoxyribonuleotide biosynthesis, CDP/CTP => dCDP/dCTP,dTDP/dTTP	MISC	Information systems
contig000306	vOTU000125	contig000306_104	K00937	polyphosphate kinase ???	contig000306-cat_1_104	contig000306-cat_1	1	M	Cytochrome d ubiquinol oxidase	Energy	Oxygen
contig000306	vOTU000125	contig000306_105	K02050	ABC.SN.P; sulfonate/nitrate/taurine transport system permease protein	contig000306-cat_1_105	contig000306-cat_1	1	M	NitT/TauT family transport system	Transporters
contig000314	vOTU000130	contig000314_5	K00789	S-adenosylmethionine synthetase [EC:2.5.1.6] [RN:R00177]	contig000314-cat_1_5	contig000314-cat_1	2	MF	Cysteine biosynthesis, methionine => cysteine	Organic Nitrogen	Amino Acid
contig000314	vOTU000130	contig000314_5	K00789	S-adenosylmethionine synthetase [EC:2.5.1.6] [RN:R00177]	contig000314-cat_1_5	contig000314-cat_1	2	MF	Methionine degradation	Organic Nitrogen	Amino Acid
contig000320	vOTU000133	contig000320_27	K00789	S-adenosylmethionine synthetase [EC:2.5.1.6] [RN:R00177]	contig000320-cat_1_27	contig000320-cat_1	2	M	Cysteine biosynthesis, methionine => cysteine	Organic Nitrogen	Amino Acid
contig000320	vOTU000133	contig000320_27	K00789	S-adenosylmethionine synthetase [EC:2.5.1.6] [RN:R00177]	contig000320-cat_1_27	contig000320-cat_1	2	M	Methionine degradation	Organic Nitrogen	Amino Acid
contig000320	vOTU000133	contig000320_46	K00558	DNA (cytosine-5-)-methyltransferase [EC:2.1.1.37] [RN:R04858]	contig000320-cat_1_46	contig000320-cat_1	2	M	Methionine degradation	Organic Nitrogen	Amino Acid
contig000341	vOTU000139	contig000341_8	S66	Catlytic type: Serine; hydrolyses the bond to the C-terminal D-Ala in tetrapeptide peptidoglycan fragments that contain an L-configured residue (lysine or meso-diaminopimelic acid) that is attached a C-terminal D-alanine residue; produced when bacterial cell walls are degraded	contig000341-cat_1_8	contig000341-cat_1	2	MF	Bacterial LD-carboxypeptidases	Organic Nitrogen	Peptidase
contig000513	vOTU000184	contig000513_66	K01520	dUTP pyrophosphatase [EC:3.6.1.23] [RN:R02100]	contig000513-cat_1_66	contig000513-cat_1	2	M	Pyrimidine deoxyribonuleotide biosynthesis, CDP/CTP => dCDP/dCTP,dTDP/dTTP	MISC	Information systems
contig000513	vOTU000184	contig000513_67	K00525	ribonucleoside-diphosphate reductase [EC:1.17.4.1] [RN:R02024]	contig000513-cat_1_67	contig000513-cat_1	2	MKE	Pyrimidine deoxyribonuleotide biosynthesis, CDP/CTP => dCDP/dCTP,dTDP/dTTP	MISC	Information systems
contig000521	vOTU000188	contig000521_65	K01520	dUTP pyrophosphatase [EC:3.6.1.23] [RN:R02100]	contig000521-cat_1_65	contig000521-cat_1	1	M	Pyrimidine deoxyribonuleotide biosynthesis, CDP/CTP => dCDP/dCTP,dTDP/dTTP	MISC	Information systems
contig000521	vOTU000188	contig000521_70	K00558	DNA (cytosine-5-)-methyltransferase [EC:2.1.1.37] [RN:R04858]	contig000521-cat_1_70	contig000521-cat_1	1	M	Methionine degradation	Organic Nitrogen	Amino Acid
contig000620	vOTU000207	contig000620_28	K01520	dUTP pyrophosphatase [EC:3.6.1.23] [RN:R02100]	contig000620-cat_1_28	contig000620-cat_1	1	M	Pyrimidine deoxyribonuleotide biosynthesis, CDP/CTP => dCDP/dCTP,dTDP/dTTP	MISC	Information systems
contig000620	vOTU000207	contig000620_33	K21636	ribonucleoside-triphosphate reductase [EC:1.17.4.2 1.1.98.6] [RN:R02022 R11636]	contig000620-cat_1_33	contig000620-cat_1	1	M	Pyrimidine deoxyribonuleotide biosynthesis, CDP/CTP => dCDP/dCTP,dTDP/dTTP	MISC	Information systems
contig000650	vOTU000219	contig000650_5	K00558	DNA (cytosine-5-)-methyltransferase [EC:2.1.1.37] [RN:R04858]	contig000650-cat_1_5	contig000650-cat_1	2	MF	Methionine degradation	Organic Nitrogen	Amino Acid
contig000672	vOTU000228	contig000672_23	K01520	dUTP pyrophosphatase [EC:3.6.1.23] [RN:R02100]	contig000672-cat_1_23	contig000672-cat_1	1	M	Pyrimidine deoxyribonuleotide biosynthesis, CDP/CTP => dCDP/dCTP,dTDP/dTTP	MISC	Information systems
contig000729	vOTU000248	contig000729_2	K00558	DNA (cytosine-5-)-methyltransferase [EC:2.1.1.37] [RN:R04858]	contig000729-cat_1_2	contig000729-cat_1	2	MF	Methionine degradation	Organic Nitrogen	Amino Acid
contig000818	vOTU000270	contig000818_19	K00558	DNA (cytosine-5-)-methyltransferase [EC:2.1.1.37] [RN:R04858]	contig000818-cat_1_19	contig000818-cat_1	2	MF	Methionine degradation	Organic Nitrogen	Amino Acid
contig000831	vOTU000271	contig000831_133	K01520	dUTP pyrophosphatase [EC:3.6.1.23] [RN:R02100]	contig000831-cat_1_133	contig000831-cat_1	1	M	Pyrimidine deoxyribonuleotide biosynthesis, CDP/CTP => dCDP/dCTP,dTDP/dTTP	MISC	Information systems
contig000843	vOTU138937	contig000843_55	K00558	DNA (cytosine-5-)-methyltransferase [EC:2.1.1.37] [RN:R04858]	contig000843-cat_1_55	contig000843-cat_1	2	M	Methionine degradation	Organic Nitrogen	Amino Acid
contig000869	vOTU000283	contig000869_16	K00525	ribonucleoside-diphosphate reductase [EC:1.17.4.1] [RN:R02024]	contig000869-cat_1_16	contig000869-cat_1	2	MKE	Pyrimidine deoxyribonuleotide biosynthesis, CDP/CTP => dCDP/dCTP,dTDP/dTTP	MISC	Information systems
contig000869	vOTU000283	contig000869_17	K01520	dUTP pyrophosphatase [EC:3.6.1.23] [RN:R02100]	contig000869-cat_1_17	contig000869-cat_1	2	M	Pyrimidine deoxyribonuleotide biosynthesis, CDP/CTP => dCDP/dCTP,dTDP/dTTP	MISC	Information systems
contig000871	vOTU047812	contig000871_80	K21636	ribonucleoside-triphosphate reductase [EC:1.17.4.2 1.1.98.6] [RN:R02022 R11636]	contig000871-cat_1_80	contig000871-cat_1	1	M	Pyrimidine deoxyribonuleotide biosynthesis, CDP/CTP => dCDP/dCTP,dTDP/dTTP	MISC	Information systems
contig001187	vOTU013195	contig001187_25	M26	Catlytic type: Metallo; cleaves the heavy chain of human IgA1 at the Pro227-Thr228 bond; tightly associated with the bacterial cell surface	contig001187-cat_2_25	contig001187-cat_2	3	MF	Endopeptidases	Organic Nitrogen	Peptidase
contig001191	vOTU000379	contig001191_2	K01520	dUTP pyrophosphatase [EC:3.6.1.23] [RN:R02100]	contig001191-cat_2_2	contig001191-cat_2	3	MF	Pyrimidine deoxyribonuleotide biosynthesis, CDP/CTP => dCDP/dCTP,dTDP/dTTP	MISC	Information systems
contig001193	vOTU000380	contig001193_11	K00558	DNA (cytosine-5-)-methyltransferase [EC:2.1.1.37] [RN:R04858]	contig001193-cat_1_11	contig001193-cat_1	2	M	Methionine degradation	Organic Nitrogen	Amino Acid
contig001271	vOTU000414	contig001271_6	K01520	dUTP pyrophosphatase [EC:3.6.1.23] [RN:R02100]	contig001271-cat_1_6	contig001271-cat_1	2	MF	Pyrimidine deoxyribonuleotide biosynthesis, CDP/CTP => dCDP/dCTP,dTDP/dTTP	MISC	Information systems
contig001289	vOTU000424	contig001289_36	K01520	dUTP pyrophosphatase [EC:3.6.1.23] [RN:R02100]	contig001289-cat_1_36	contig001289-cat_1	2	M	Pyrimidine deoxyribonuleotide biosynthesis, CDP/CTP => dCDP/dCTP,dTDP/dTTP	MISC	Information systems
contig001321	vOTU036122	contig001321_3	K01520	dUTP pyrophosphatase [EC:3.6.1.23] [RN:R02100]	contig001321-cat_1_3	contig001321-cat_1	2	MF	Pyrimidine deoxyribonuleotide biosynthesis, CDP/CTP => dCDP/dCTP,dTDP/dTTP	MISC	Information systems
contig001386	vOTU000467	contig001386_40	K00558	DNA (cytosine-5-)-methyltransferase [EC:2.1.1.37] [RN:R04858]	contig001386-cat_1_40	contig001386-cat_1	2	M	Methionine degradation	Organic Nitrogen	Amino Acid
contig001434	vOTU000489	contig001434_4	K01520	dUTP pyrophosphatase [EC:3.6.1.23] [RN:R02100]	contig001434-cat_1_4	contig001434-cat_1	2	MF	Pyrimidine deoxyribonuleotide biosynthesis, CDP/CTP => dCDP/dCTP,dTDP/dTTP	MISC	Information systems
contig001466	vOTU000502	contig001466_31	K00558	DNA (cytosine-5-)-methyltransferase [EC:2.1.1.37] [RN:R04858]	contig001466-cat_2_31	contig001466-cat_2	3	MF	Methionine degradation	Organic Nitrogen	Amino Acid
contig001529	vOTU000532	contig001529_18	K00558	DNA (cytosine-5-)-methyltransferase [EC:2.1.1.37] [RN:R04858]	contig001529-cat_1_18	contig001529-cat_1	1	MF	Methionine degradation	Organic Nitrogen	Amino Acid
contig001564	vOTU000548	contig001564_80	K00560	thymidylate synthase [EC:2.1.1.45] [RN:R02101]	contig001564-cat_1_80	contig001564-cat_1	1	M	Pyrimidine deoxyribonuleotide biosynthesis, CDP/CTP => dCDP/dCTP,dTDP/dTTP	MISC	Information systems
contig001564	vOTU000548	contig001564_85	K21636	ribonucleoside-triphosphate reductase [EC:1.17.4.2 1.1.98.6] [RN:R02022 R11636]	contig001564-cat_1_85	contig001564-cat_1	1	M	Pyrimidine deoxyribonuleotide biosynthesis, CDP/CTP => dCDP/dCTP,dTDP/dTTP	MISC	Information systems
contig001564	vOTU000548	contig001564_91	K01520	dUTP pyrophosphatase [EC:3.6.1.23] [RN:R02100]	contig001564-cat_1_91	contig001564-cat_1	1	M	Pyrimidine deoxyribonuleotide biosynthesis, CDP/CTP => dCDP/dCTP,dTDP/dTTP	MISC	Information systems
contig001579	vOTU000552	contig001579_14	K21636	ribonucleoside-triphosphate reductase [EC:1.17.4.2 1.1.98.6] [RN:R02022 R11636]	contig001579-cat_1_14	contig001579-cat_1	1	M	Pyrimidine deoxyribonuleotide biosynthesis, CDP/CTP => dCDP/dCTP,dTDP/dTTP	MISC	Information systems
contig001601	vOTU000568	contig001601_55	K01520	dUTP pyrophosphatase [EC:3.6.1.23] [RN:R02100]	contig001601-cat_1_55	contig001601-cat_1	1	M	Pyrimidine deoxyribonuleotide biosynthesis, CDP/CTP => dCDP/dCTP,dTDP/dTTP	MISC	Information systems
contig001618	vOTU000578	contig001618_41	K00560	thymidylate synthase [EC:2.1.1.45] [RN:R02101]	contig001618-cat_2_41	contig001618-cat_2	3	M	Pyrimidine deoxyribonuleotide biosynthesis, CDP/CTP => dCDP/dCTP,dTDP/dTTP	MISC	Information systems
contig001645	vOTU000593	contig001645_110	K01520	dUTP pyrophosphatase [EC:3.6.1.23] [RN:R02100]	contig001645-cat_1_110	contig001645-cat_1	2	M	Pyrimidine deoxyribonuleotide biosynthesis, CDP/CTP => dCDP/dCTP,dTDP/dTTP	MISC	Information systems
contig001645	vOTU000593	contig001645_115	K00525	ribonucleoside-diphosphate reductase [EC:1.17.4.1] [RN:R02024]	contig001645-cat_1_115	contig001645-cat_1	2	MKE	Pyrimidine deoxyribonuleotide biosynthesis, CDP/CTP => dCDP/dCTP,dTDP/dTTP	MISC	Information systems
contig001660	vOTU000601	contig001660_44	K01520	dUTP pyrophosphatase [EC:3.6.1.23] [RN:R02100]	contig001660-cat_1_44	contig001660-cat_1	2	M	Pyrimidine deoxyribonuleotide biosynthesis, CDP/CTP => dCDP/dCTP,dTDP/dTTP	MISC	Information systems
contig001663	vOTU000602	contig001663_22	K00558	DNA (cytosine-5-)-methyltransferase [EC:2.1.1.37] [RN:R04858]	contig001663-cat_1_22	contig001663-cat_1	2	M	Methionine degradation	Organic Nitrogen	Amino Acid
contig001699	vOTU000621	contig001699_43	K21636	ribonucleoside-triphosphate reductase [EC:1.17.4.2 1.1.98.6] [RN:R02022 R11636]	contig001699-cat_1_43	contig001699-cat_1	2	M	Pyrimidine deoxyribonuleotide biosynthesis, CDP/CTP => dCDP/dCTP,dTDP/dTTP	MISC	Information systems
contig001704	vOTU000623	contig001704_78	K01520	dUTP pyrophosphatase [EC:3.6.1.23] [RN:R02100]	contig001704-cat_1_78	contig001704-cat_1	1	M	Pyrimidine deoxyribonuleotide biosynthesis, CDP/CTP => dCDP/dCTP,dTDP/dTTP	MISC	Information systems
contig001779	vOTU013344	contig001779_43	K01520	dUTP pyrophosphatase [EC:3.6.1.23] [RN:R02100]	contig001779-cat_1_43	contig001779-cat_1	1	M	Pyrimidine deoxyribonuleotide biosynthesis, CDP/CTP => dCDP/dCTP,dTDP/dTTP	MISC	Information systems
contig001821	vOTU000675	contig001821_25	K01494	dCTP deaminase [EC:3.5.4.13] [RN:R02325]	contig001821-cat_1_25	contig001821-cat_1	2	M	Pyrimidine deoxyribonuleotide biosynthesis, CDP/CTP => dCDP/dCTP,dTDP/dTTP	MISC	Information systems
contig001834	vOTU000680	contig001834_22	K00558	DNA (cytosine-5-)-methyltransferase [EC:2.1.1.37] [RN:R04858]	contig001834-cat_1_22	contig001834-cat_1	2	M	Methionine degradation	Organic Nitrogen	Amino Acid
contig001866	vOTU000693	contig001866_21	C110	Catlytic type: Cysteine	contig001866-cat_1_21	contig001866-cat_1	2	M	Cysteine endopeptidases	Organic Nitrogen	Peptidase
contig001866	vOTU000693	contig001866_25	K01520	dUTP pyrophosphatase [EC:3.6.1.23] [RN:R02100]	contig001866-cat_1_25	contig001866-cat_1	2	M	Pyrimidine deoxyribonuleotide biosynthesis, CDP/CTP => dCDP/dCTP,dTDP/dTTP	MISC	Information systems
contig001866	vOTU000693	contig001866_30	K21636	ribonucleoside-triphosphate reductase [EC:1.17.4.2 1.1.98.6] [RN:R02022 R11636]	contig001866-cat_1_30	contig001866-cat_1	2	M	Pyrimidine deoxyribonuleotide biosynthesis, CDP/CTP => dCDP/dCTP,dTDP/dTTP	MISC	Information systems
contig001866	vOTU000693	contig001866_80	K00789	S-adenosylmethionine synthetase [EC:2.5.1.6] [RN:R00177]	contig001866-cat_1_80	contig001866-cat_1	2	M	Cysteine biosynthesis, methionine => cysteine	Organic Nitrogen	Amino Acid
contig001866	vOTU000693	contig001866_80	K00789	S-adenosylmethionine synthetase [EC:2.5.1.6] [RN:R00177]	contig001866-cat_1_80	contig001866-cat_1	2	M	Methionine degradation	Organic Nitrogen	Amino Acid
contig001875	vOTU000695	contig001875_32	K01520	dUTP pyrophosphatase [EC:3.6.1.23] [RN:R02100]	contig001875-cat_1_32	contig001875-cat_1	2	MF	Pyrimidine deoxyribonuleotide biosynthesis, CDP/CTP => dCDP/dCTP,dTDP/dTTP	MISC	Information systems
contig001914	vOTU000708	contig001914_66	K01520	dUTP pyrophosphatase [EC:3.6.1.23] [RN:R02100]	contig001914-cat_1_66	contig001914-cat_1	2	MF	Pyrimidine deoxyribonuleotide biosynthesis, CDP/CTP => dCDP/dCTP,dTDP/dTTP	MISC	Information systems
contig001915	vOTU061147	contig001915_12	K01520	dUTP pyrophosphatase [EC:3.6.1.23] [RN:R02100]	contig001915-cat_1_12	contig001915-cat_1	1	M	Pyrimidine deoxyribonuleotide biosynthesis, CDP/CTP => dCDP/dCTP,dTDP/dTTP	MISC	Information systems
contig001962	vOTU000722	contig001962_22	K21636	ribonucleoside-triphosphate reductase [EC:1.17.4.2 1.1.98.6] [RN:R02022 R11636]	contig001962-cat_1_22	contig001962-cat_1	2	M	Pyrimidine deoxyribonuleotide biosynthesis, CDP/CTP => dCDP/dCTP,dTDP/dTTP	MISC	Information systems
contig001962	vOTU000722	contig001962_25	K01520	dUTP pyrophosphatase [EC:3.6.1.23] [RN:R02100]	contig001962-cat_1_25	contig001962-cat_1	2	M	Pyrimidine deoxyribonuleotide biosynthesis, CDP/CTP => dCDP/dCTP,dTDP/dTTP	MISC	Information systems
contig002082	vOTU000757	contig002082_5	K00560	thymidylate synthase [EC:2.1.1.45] [RN:R02101]	contig002082-cat_2_5	contig002082-cat_2	3	MF	Pyrimidine deoxyribonuleotide biosynthesis, CDP/CTP => dCDP/dCTP,dTDP/dTTP	MISC	Information systems
contig002103	vOTU001023	contig002103_37	K00558	DNA (cytosine-5-)-methyltransferase [EC:2.1.1.37] [RN:R04858]	contig002103-cat_1_37	contig002103-cat_1	2	M	Methionine degradation	Organic Nitrogen	Amino Acid
contig002245	vOTU000825	contig002245_2	K00558	DNA (cytosine-5-)-methyltransferase [EC:2.1.1.37] [RN:R04858]	contig002245-cat_1_2	contig002245-cat_1	2	MF	Methionine degradation	Organic Nitrogen	Amino Acid
contig002358	vOTU136164	contig002358_7	K09883	cobT; cobaltochelatase CobT [EC:6.6.1.2]	contig002358-cat_1_7	contig002358-cat_1	2	M	Cobalamin biosynthesis, precorrin2 => cobinamide	MISC	aerobic corrin ring synthesis
contig002402	vOTU000880	contig002402_53	K00558	DNA (cytosine-5-)-methyltransferase [EC:2.1.1.37] [RN:R04858]	contig002402-cat_1_53	contig002402-cat_1	2	M	Methionine degradation	Organic Nitrogen	Amino Acid
contig002402	vOTU000880	contig002402_67	K01520	dUTP pyrophosphatase [EC:3.6.1.23] [RN:R02100]	contig002402-cat_1_67	contig002402-cat_1	2	M	Pyrimidine deoxyribonuleotide biosynthesis, CDP/CTP => dCDP/dCTP,dTDP/dTTP	MISC	Information systems
contig002412	vOTU000884	contig002412_6	K00560	thymidylate synthase [EC:2.1.1.45] [RN:R02101]	contig002412-cat_1_6	contig002412-cat_1	2	MF	Pyrimidine deoxyribonuleotide biosynthesis, CDP/CTP => dCDP/dCTP,dTDP/dTTP	MISC	Information systems
contig002412	vOTU000884	contig002412_9	K01520	dUTP pyrophosphatase [EC:3.6.1.23] [RN:R02100]	contig002412-cat_1_9	contig002412-cat_1	2	MF	Pyrimidine deoxyribonuleotide biosynthesis, CDP/CTP => dCDP/dCTP,dTDP/dTTP	MISC	Information systems
contig002420	vOTU000888	contig002420_17	K00558	DNA (cytosine-5-)-methyltransferase [EC:2.1.1.37] [RN:R04858]	contig002420-cat_1_17	contig002420-cat_1	2	M	Methionine degradation	Organic Nitrogen	Amino Acid
contig002426	vOTU000892	contig002426_11	K21636	ribonucleoside-triphosphate reductase [EC:1.17.4.2 1.1.98.6] [RN:R02022 R11636]	contig002426-cat_1_11	contig002426-cat_1	1	M	Pyrimidine deoxyribonuleotide biosynthesis, CDP/CTP => dCDP/dCTP,dTDP/dTTP	MISC	Information systems
contig002431	vOTU000896	contig002431_164	K02939	large subunit ribosomal protein L9	contig002431-cat_1_164	contig002431-cat_1	1	M	Ribosome, bacteria	MISC	Information systems
contig002431	vOTU000896	contig002431_174	K21636	ribonucleoside-triphosphate reductase [EC:1.17.4.2 1.1.98.6] [RN:R02022 R11636]	contig002431-cat_1_174	contig002431-cat_1	1	M	Pyrimidine deoxyribonuleotide biosynthesis, CDP/CTP => dCDP/dCTP,dTDP/dTTP	MISC	Information systems
contig002431	vOTU000896	contig002431_201	K01520	dUTP pyrophosphatase [EC:3.6.1.23] [RN:R02100]	contig002431-cat_1_201	contig002431-cat_1	1	M	Pyrimidine deoxyribonuleotide biosynthesis, CDP/CTP => dCDP/dCTP,dTDP/dTTP	MISC	Information systems
contig002432	vOTU000897	contig002432_14	K00560	thymidylate synthase [EC:2.1.1.45] [RN:R02101]	contig002432-cat_1_14	contig002432-cat_1	2	M	Pyrimidine deoxyribonuleotide biosynthesis, CDP/CTP => dCDP/dCTP,dTDP/dTTP	MISC	Information systems
contig002432	vOTU000897	contig002432_17	K01520	dUTP pyrophosphatase [EC:3.6.1.23] [RN:R02100]	contig002432-cat_1_17	contig002432-cat_1	2	M	Pyrimidine deoxyribonuleotide biosynthesis, CDP/CTP => dCDP/dCTP,dTDP/dTTP	MISC	Information systems
contig002469	vOTU000918	contig002469_14	K21636	ribonucleoside-triphosphate reductase [EC:1.17.4.2 1.1.98.6] [RN:R02022 R11636]	contig002469-cat_1_14	contig002469-cat_1	1	M	Pyrimidine deoxyribonuleotide biosynthesis, CDP/CTP => dCDP/dCTP,dTDP/dTTP	MISC	Information systems
contig002469	vOTU000918	contig002469_20	K01520	dUTP pyrophosphatase [EC:3.6.1.23] [RN:R02100]	contig002469-cat_1_20	contig002469-cat_1	1	M	Pyrimidine deoxyribonuleotide biosynthesis, CDP/CTP => dCDP/dCTP,dTDP/dTTP	MISC	Information systems
contig002522	vOTU000679	contig002522_14	K01520	dUTP pyrophosphatase [EC:3.6.1.23] [RN:R02100]	contig002522-cat_1_14	contig002522-cat_1	2	M	Pyrimidine deoxyribonuleotide biosynthesis, CDP/CTP => dCDP/dCTP,dTDP/dTTP	MISC	Information systems
contig002572	vOTU000952	contig002572_7	K00558	DNA (cytosine-5-)-methyltransferase [EC:2.1.1.37] [RN:R04858]	contig002572-cat_2_7	contig002572-cat_2	3	MF	Methionine degradation	Organic Nitrogen	Amino Acid
contig002669	vOTU000992	contig002669_20	K01520	dUTP pyrophosphatase [EC:3.6.1.23] [RN:R02100]	contig002669-cat_1_20	contig002669-cat_1	2	M	Pyrimidine deoxyribonuleotide biosynthesis, CDP/CTP => dCDP/dCTP,dTDP/dTTP	MISC	Information systems
contig002695	vOTU001007	contig002695_10	K21636	ribonucleoside-triphosphate reductase [EC:1.17.4.2 1.1.98.6] [RN:R02022 R11636]	contig002695-cat_1_10	contig002695-cat_1	2	M	Pyrimidine deoxyribonuleotide biosynthesis, CDP/CTP => dCDP/dCTP,dTDP/dTTP	MISC	Information systems
contig002738	vOTU001028	contig002738_56	K01520	dUTP pyrophosphatase [EC:3.6.1.23] [RN:R02100]	contig002738-cat_1_56	contig002738-cat_1	2	M	Pyrimidine deoxyribonuleotide biosynthesis, CDP/CTP => dCDP/dCTP,dTDP/dTTP	MISC	Information systems
contig002738	vOTU001028	contig002738_58	K21636	ribonucleoside-triphosphate reductase [EC:1.17.4.2 1.1.98.6] [RN:R02022 R11636]	contig002738-cat_1_58	contig002738-cat_1	2	MF	Pyrimidine deoxyribonuleotide biosynthesis, CDP/CTP => dCDP/dCTP,dTDP/dTTP	MISC	Information systems
contig002754	vOTU001036	contig002754_32	K01520	dUTP pyrophosphatase [EC:3.6.1.23] [RN:R02100]	contig002754-cat_1_32	contig002754-cat_1	1	M	Pyrimidine deoxyribonuleotide biosynthesis, CDP/CTP => dCDP/dCTP,dTDP/dTTP	MISC	Information systems
contig002766	vOTU001041	contig002766_39	K01520	dUTP pyrophosphatase [EC:3.6.1.23] [RN:R02100]	contig002766-cat_2_39	contig002766-cat_2	3	M	Pyrimidine deoxyribonuleotide biosynthesis, CDP/CTP => dCDP/dCTP,dTDP/dTTP	MISC	Information systems
contig002766	vOTU001041	contig002766_43	K21636	ribonucleoside-triphosphate reductase [EC:1.17.4.2 1.1.98.6] [RN:R02022 R11636]	contig002766-cat_2_43	contig002766-cat_2	3	M	Pyrimidine deoxyribonuleotide biosynthesis, CDP/CTP => dCDP/dCTP,dTDP/dTTP	MISC	Information systems
contig002818	vOTU001065	contig002818_24	K01939	adenylosuccinate synthase [EC:6.3.4.4] [RN:R01135]	contig002818-cat_1_24	contig002818-cat_1	2	M	Adenine ribonucleotide biosynthesis, IMP => ADP,ATP	MISC	Information systems
contig002842	vOTU001074	contig002842_26	K00525	ribonucleoside-diphosphate reductase [EC:1.17.4.1] [RN:R02024]	contig002842-cat_1_26	contig002842-cat_1	1	MKE	Pyrimidine deoxyribonuleotide biosynthesis, CDP/CTP => dCDP/dCTP,dTDP/dTTP	MISC	Information systems
contig002856	vOTU001079	contig002856_11	K21636	ribonucleoside-triphosphate reductase [EC:1.17.4.2 1.1.98.6] [RN:R02022 R11636]	contig002856-cat_1_11	contig002856-cat_1	2	M	Pyrimidine deoxyribonuleotide biosynthesis, CDP/CTP => dCDP/dCTP,dTDP/dTTP	MISC	Information systems
contig002856	vOTU001079	contig002856_18	K01520	dUTP pyrophosphatase [EC:3.6.1.23] [RN:R02100]	contig002856-cat_1_18	contig002856-cat_1	2	M	Pyrimidine deoxyribonuleotide biosynthesis, CDP/CTP => dCDP/dCTP,dTDP/dTTP	MISC	Information systems
contig002862	vOTU109778	contig002862_32	K01520	dUTP pyrophosphatase [EC:3.6.1.23] [RN:R02100]	contig002862-cat_1_32	contig002862-cat_1	2	M	Pyrimidine deoxyribonuleotide biosynthesis, CDP/CTP => dCDP/dCTP,dTDP/dTTP	MISC	Information systems
contig002870	vOTU001087	contig002870_12	K00789	S-adenosylmethionine synthetase [EC:2.5.1.6] [RN:R00177]	contig002870-cat_1_12	contig002870-cat_1	2	M	Cysteine biosynthesis, methionine => cysteine	Organic Nitrogen	Amino Acid
contig002870	vOTU001087	contig002870_12	K00789	S-adenosylmethionine synthetase [EC:2.5.1.6] [RN:R00177]	contig002870-cat_1_12	contig002870-cat_1	2	M	Methionine degradation	Organic Nitrogen	Amino Acid
contig002872	vOTU001088	contig002872_39	GT2	GT2 cellulose synthase (EC 2.4.1.12); chitin synthase (EC 2.4.1.16); dolichyl-phosphate beta-D-mannosyltransferase (EC 2.4.1.83); dolichyl-phosphate beta-glucosyltransferase (EC 2.4.1.117); N-acetylglucosaminyltransferase (EC 2.4.1.-); N-acetylgalactosaminyltransferase (EC 2.4.1.-); hyaluronan synthase (EC 2.4.1.212); chitin oligosaccharide synthase (EC 2.4.1.-); beta-1,3-glucan synthase (EC 2.4.…	contig002872-cat_1_39	contig002872-cat_1	2	M	GlycosylTransferases	carbon utilization	CAZY
contig002879	vOTU001091	contig002879_49	K00558	DNA (cytosine-5-)-methyltransferase [EC:2.1.1.37] [RN:R04858]	contig002879-cat_1_49	contig002879-cat_1	2	MF	Methionine degradation	Organic Nitrogen	Amino Acid
contig002887	vOTU001092	contig002887_122	K21636	ribonucleoside-triphosphate reductase [EC:1.17.4.2 1.1.98.6] [RN:R02022 R11636]	contig002887-cat_1_122	contig002887-cat_1	2	M	Pyrimidine deoxyribonuleotide biosynthesis, CDP/CTP => dCDP/dCTP,dTDP/dTTP	MISC	Information systems
contig002887	vOTU001092	contig002887_153	K01520	dUTP pyrophosphatase [EC:3.6.1.23] [RN:R02100]	contig002887-cat_1_153	contig002887-cat_1	2	M	Pyrimidine deoxyribonuleotide biosynthesis, CDP/CTP => dCDP/dCTP,dTDP/dTTP	MISC	Information systems
contig002900	vOTU001103	contig002900_22	K21636	ribonucleoside-triphosphate reductase [EC:1.17.4.2 1.1.98.6] [RN:R02022 R11636]	contig002900-cat_1_22	contig002900-cat_1	2	M	Pyrimidine deoxyribonuleotide biosynthesis, CDP/CTP => dCDP/dCTP,dTDP/dTTP	MISC	Information systems
contig002900	vOTU001103	contig002900_31	K01520	dUTP pyrophosphatase [EC:3.6.1.23] [RN:R02100]	contig002900-cat_1_31	contig002900-cat_1	1	M	Pyrimidine deoxyribonuleotide biosynthesis, CDP/CTP => dCDP/dCTP,dTDP/dTTP	MISC	Information systems
contig003002	vOTU001154	contig003002_280	K21636	ribonucleoside-triphosphate reductase [EC:1.17.4.2 1.1.98.6] [RN:R02022 R11636]	contig003002-cat_1_280	contig003002-cat_1	2	M	Pyrimidine deoxyribonuleotide biosynthesis, CDP/CTP => dCDP/dCTP,dTDP/dTTP	MISC	Information systems
contig003002	vOTU001154	contig003002_288	K01520	dUTP pyrophosphatase [EC:3.6.1.23] [RN:R02100]	contig003002-cat_1_288	contig003002-cat_1	2	M	Pyrimidine deoxyribonuleotide biosynthesis, CDP/CTP => dCDP/dCTP,dTDP/dTTP	MISC	Information systems
contig003006	vOTU001157	contig003006_39	K00558	DNA (cytosine-5-)-methyltransferase [EC:2.1.1.37] [RN:R04858]	contig003006-cat_1_39	contig003006-cat_1	1	M	Methionine degradation	Organic Nitrogen	Amino Acid
contig003010	vOTU001161	contig003010_48	K21636	ribonucleoside-triphosphate reductase [EC:1.17.4.2 1.1.98.6] [RN:R02022 R11636]	contig003010-cat_1_48	contig003010-cat_1	2	M	Pyrimidine deoxyribonuleotide biosynthesis, CDP/CTP => dCDP/dCTP,dTDP/dTTP	MISC	Information systems
contig003039	vOTU001174	contig003039_46	K04486	histidinol-phosphatase [EC:3.1.3.15] [RN:R03013]	contig003039-cat_1_46	contig003039-cat_1	2	MF	Histidine biosynthesis, PRPP => histidine	Organic Nitrogen	Amino Acid
contig003127	vOTU001214	contig003127_27	K01520	dUTP pyrophosphatase [EC:3.6.1.23] [RN:R02100]	contig003127-cat_1_27	contig003127-cat_1	2	M	Pyrimidine deoxyribonuleotide biosynthesis, CDP/CTP => dCDP/dCTP,dTDP/dTTP	MISC	Information systems
contig003134	vOTU001217	contig003134_37	K21636	ribonucleoside-triphosphate reductase [EC:1.17.4.2 1.1.98.6] [RN:R02022 R11636]	contig003134-cat_1_37	contig003134-cat_1	2	M	Pyrimidine deoxyribonuleotide biosynthesis, CDP/CTP => dCDP/dCTP,dTDP/dTTP	MISC	Information systems
contig003134	vOTU001217	contig003134_43	K01520	dUTP pyrophosphatase [EC:3.6.1.23] [RN:R02100]	contig003134-cat_1_43	contig003134-cat_1	2	M	Pyrimidine deoxyribonuleotide biosynthesis, CDP/CTP => dCDP/dCTP,dTDP/dTTP	MISC	Information systems
contig003135	vOTU001218	contig003135_47	K21636	ribonucleoside-triphosphate reductase [EC:1.17.4.2 1.1.98.6] [RN:R02022 R11636]	contig003135-cat_1_47	contig003135-cat_1	1	M	Pyrimidine deoxyribonuleotide biosynthesis, CDP/CTP => dCDP/dCTP,dTDP/dTTP	MISC	Information systems
contig003135	vOTU001218	contig003135_49	K21636	ribonucleoside-triphosphate reductase [EC:1.17.4.2 1.1.98.6] [RN:R02022 R11636]	contig003135-cat_1_49	contig003135-cat_1	1	M	Pyrimidine deoxyribonuleotide biosynthesis, CDP/CTP => dCDP/dCTP,dTDP/dTTP	MISC	Information systems
contig003135	vOTU001218	contig003135_123	K01520	dUTP pyrophosphatase [EC:3.6.1.23] [RN:R02100]	contig003135-cat_1_123	contig003135-cat_1	1	M	Pyrimidine deoxyribonuleotide biosynthesis, CDP/CTP => dCDP/dCTP,dTDP/dTTP	MISC	Information systems
contig003212	vOTU001255	contig003212_7	K01520	dUTP pyrophosphatase [EC:3.6.1.23] [RN:R02100]	contig003212-cat_1_7	contig003212-cat_1	2	MF	Pyrimidine deoxyribonuleotide biosynthesis, CDP/CTP => dCDP/dCTP,dTDP/dTTP	MISC	Information systems
contig003212	vOTU001255	contig003212_43	K00525	ribonucleoside-diphosphate reductase [EC:1.17.4.1] [RN:R02024]	contig003212-cat_1_43	contig003212-cat_1	1	MKE	Pyrimidine deoxyribonuleotide biosynthesis, CDP/CTP => dCDP/dCTP,dTDP/dTTP	MISC	Information systems
contig003221	vOTU001260	contig003221_17	K00560	thymidylate synthase [EC:2.1.1.45] [RN:R02101]	contig003221-cat_1_17	contig003221-cat_1	2	M	Pyrimidine deoxyribonuleotide biosynthesis, CDP/CTP => dCDP/dCTP,dTDP/dTTP	MISC	Information systems
contig003238	vOTU001270	contig003238_9	K00558	DNA (cytosine-5-)-methyltransferase [EC:2.1.1.37] [RN:R04858]	contig003238-cat_1_9	contig003238-cat_1	2	MF	Methionine degradation	Organic Nitrogen	Amino Acid
contig003271	vOTU001289	contig003271_9	K00558	DNA (cytosine-5-)-methyltransferase [EC:2.1.1.37] [RN:R04858]	contig003271-cat_1_9	contig003271-cat_1	2	MF	Methionine degradation	Organic Nitrogen	Amino Acid
contig003275	vOTU001291	contig003275_44	K00558	DNA (cytosine-5-)-methyltransferase [EC:2.1.1.37] [RN:R04858]	contig003275-cat_1_44	contig003275-cat_1	1	M	Methionine degradation	Organic Nitrogen	Amino Acid
contig003290	vOTU001879	contig003290_86	K21636	ribonucleoside-triphosphate reductase [EC:1.17.4.2 1.1.98.6] [RN:R02022 R11636]	contig003290-cat_1_86	contig003290-cat_1	2	M	Pyrimidine deoxyribonuleotide biosynthesis, CDP/CTP => dCDP/dCTP,dTDP/dTTP	MISC	Information systems
contig003290	vOTU001879	contig003290_95	K01520	dUTP pyrophosphatase [EC:3.6.1.23] [RN:R02100]	contig003290-cat_1_95	contig003290-cat_1	2	M	Pyrimidine deoxyribonuleotide biosynthesis, CDP/CTP => dCDP/dCTP,dTDP/dTTP	MISC	Information systems
contig003321	vOTU001300	contig003321_52	K01520	dUTP pyrophosphatase [EC:3.6.1.23] [RN:R02100]	contig003321-cat_1_52	contig003321-cat_1	1	M	Pyrimidine deoxyribonuleotide biosynthesis, CDP/CTP => dCDP/dCTP,dTDP/dTTP	MISC	Information systems
contig003388	vOTU001324	contig003388_3	K01520	dUTP pyrophosphatase [EC:3.6.1.23] [RN:R02100]	contig003388-cat_1_3	contig003388-cat_1	2	MF	Pyrimidine deoxyribonuleotide biosynthesis, CDP/CTP => dCDP/dCTP,dTDP/dTTP	MISC	Information systems
contig003426	vOTU001336	contig003426_68	K21636	ribonucleoside-triphosphate reductase [EC:1.17.4.2 1.1.98.6] [RN:R02022 R11636]	contig003426-cat_1_68	contig003426-cat_1	1	M	Pyrimidine deoxyribonuleotide biosynthesis, CDP/CTP => dCDP/dCTP,dTDP/dTTP	MISC	Information systems
contig003447	vOTU001341	contig003447_27	K00558	DNA (cytosine-5-)-methyltransferase [EC:2.1.1.37] [RN:R04858]	contig003447-cat_1_27	contig003447-cat_1	2	M	Methionine degradation	Organic Nitrogen	Amino Acid
contig003652	vOTU001417	contig003652_4	K01520	dUTP pyrophosphatase [EC:3.6.1.23] [RN:R02100]	contig003652-cat_1_4	contig003652-cat_1	2	MF	Pyrimidine deoxyribonuleotide biosynthesis, CDP/CTP => dCDP/dCTP,dTDP/dTTP	MISC	Information systems
contig003713	vOTU001439	contig003713_10	K01520	dUTP pyrophosphatase [EC:3.6.1.23] [RN:R02100]	contig003713-cat_1_10	contig003713-cat_1	2	M	Pyrimidine deoxyribonuleotide biosynthesis, CDP/CTP => dCDP/dCTP,dTDP/dTTP	MISC	Information systems
contig003789	vOTU001470	contig003789_35	K00558	DNA (cytosine-5-)-methyltransferase [EC:2.1.1.37] [RN:R04858]	contig003789-cat_1_35	contig003789-cat_1	2	M	Methionine degradation	Organic Nitrogen	Amino Acid
contig003811	vOTU001479	contig003811_16	K01520	dUTP pyrophosphatase [EC:3.6.1.23] [RN:R02100]	contig003811-cat_2_16	contig003811-cat_2	3	M	Pyrimidine deoxyribonuleotide biosynthesis, CDP/CTP => dCDP/dCTP,dTDP/dTTP	MISC	Information systems
contig003815	vOTU001481	contig003815_16	K01520	dUTP pyrophosphatase [EC:3.6.1.23] [RN:R02100]	contig003815-cat_1_16	contig003815-cat_1	2	M	Pyrimidine deoxyribonuleotide biosynthesis, CDP/CTP => dCDP/dCTP,dTDP/dTTP	MISC	Information systems
contig003835	vOTU001493	contig003835_2	K01520	dUTP pyrophosphatase [EC:3.6.1.23] [RN:R02100]	contig003835-cat_1_2	contig003835-cat_1	2	MF	Pyrimidine deoxyribonuleotide biosynthesis, CDP/CTP => dCDP/dCTP,dTDP/dTTP	MISC	Information systems
contig003883	vOTU001511	contig003883_37	K01520	dUTP pyrophosphatase [EC:3.6.1.23] [RN:R02100]	contig003883-cat_1_37	contig003883-cat_1	2	MF	Pyrimidine deoxyribonuleotide biosynthesis, CDP/CTP => dCDP/dCTP,dTDP/dTTP	MISC	Information systems
contig003932	vOTU001522	contig003932_18	K21636	ribonucleoside-triphosphate reductase [EC:1.17.4.2 1.1.98.6] [RN:R02022 R11636]	contig003932-cat_1_18	contig003932-cat_1	1	M	Pyrimidine deoxyribonuleotide biosynthesis, CDP/CTP => dCDP/dCTP,dTDP/dTTP	MISC	Information systems
contig003970	vOTU001538	contig003970_29	K00558	DNA (cytosine-5-)-methyltransferase [EC:2.1.1.37] [RN:R04858]	contig003970-cat_1_29	contig003970-cat_1	1	M	Methionine degradation	Organic Nitrogen	Amino Acid
contig003970	vOTU001538	contig003970_30	K01520	dUTP pyrophosphatase [EC:3.6.1.23] [RN:R02100]	contig003970-cat_1_30	contig003970-cat_1	1	M	Pyrimidine deoxyribonuleotide biosynthesis, CDP/CTP => dCDP/dCTP,dTDP/dTTP	MISC	Information systems
contig003975	vOTU001542	contig003975_29	K00525	ribonucleoside-diphosphate reductase [EC:1.17.4.1] [RN:R02024]	contig003975-cat_1_29	contig003975-cat_1	1	MKE	Pyrimidine deoxyribonuleotide biosynthesis, CDP/CTP => dCDP/dCTP,dTDP/dTTP	MISC	Information systems
contig003982	vOTU001547	contig003982_210	K01520	dUTP pyrophosphatase [EC:3.6.1.23] [RN:R02100]	contig003982-cat_1_210	contig003982-cat_1	2	M	Pyrimidine deoxyribonuleotide biosynthesis, CDP/CTP => dCDP/dCTP,dTDP/dTTP	MISC	Information systems
contig003982	vOTU001547	contig003982_212	K01520	dUTP pyrophosphatase [EC:3.6.1.23] [RN:R02100]	contig003982-cat_1_212	contig003982-cat_1	2	M	Pyrimidine deoxyribonuleotide biosynthesis, CDP/CTP => dCDP/dCTP,dTDP/dTTP	MISC	Information systems
contig003982	vOTU001547	contig003982_220	K21636	ribonucleoside-triphosphate reductase [EC:1.17.4.2 1.1.98.6] [RN:R02022 R11636]	contig003982-cat_1_220	contig003982-cat_1	2	M	Pyrimidine deoxyribonuleotide biosynthesis, CDP/CTP => dCDP/dCTP,dTDP/dTTP	MISC	Information systems
contig004092	vOTU001604	contig004092_3	K00558	DNA (cytosine-5-)-methyltransferase [EC:2.1.1.37] [RN:R04858]	contig004092-cat_1_3	contig004092-cat_1	2	MF	Methionine degradation	Organic Nitrogen	Amino Acid
contig004095	vOTU001607	contig004095_20	K00789	S-adenosylmethionine synthetase [EC:2.5.1.6] [RN:R00177]	contig004095-cat_2_20	contig004095-cat_2	3	M	Cysteine biosynthesis, methionine => cysteine	Organic Nitrogen	Amino Acid
contig004095	vOTU001607	contig004095_20	K00789	S-adenosylmethionine synthetase [EC:2.5.1.6] [RN:R00177]	contig004095-cat_2_20	contig004095-cat_2	3	M	Methionine degradation	Organic Nitrogen	Amino Acid
contig004095	vOTU001607	contig004095_26	K21636	ribonucleoside-triphosphate reductase [EC:1.17.4.2 1.1.98.6] [RN:R02022 R11636]	contig004095-cat_2_26	contig004095-cat_2	3	MF	Pyrimidine deoxyribonuleotide biosynthesis, CDP/CTP => dCDP/dCTP,dTDP/dTTP	MISC	Information systems
contig004103	vOTU001612	contig004103_39	K00558	DNA (cytosine-5-)-methyltransferase [EC:2.1.1.37] [RN:R04858]	contig004103-cat_1_39	contig004103-cat_1	2	M	Methionine degradation	Organic Nitrogen	Amino Acid
contig004139	vOTU001633	contig004139_40	K01520	dUTP pyrophosphatase [EC:3.6.1.23] [RN:R02100]	contig004139-cat_2_40	contig004139-cat_2	3	M	Pyrimidine deoxyribonuleotide biosynthesis, CDP/CTP => dCDP/dCTP,dTDP/dTTP	MISC	Information systems
contig004200	vOTU001664	contig004200_12	K01520	dUTP pyrophosphatase [EC:3.6.1.23] [RN:R02100]	contig004200-cat_1_12	contig004200-cat_1	2	M	Pyrimidine deoxyribonuleotide biosynthesis, CDP/CTP => dCDP/dCTP,dTDP/dTTP	MISC	Information systems
contig004242	vOTU001684	contig004242_3	K00789	S-adenosylmethionine synthetase [EC:2.5.1.6] [RN:R00177]	contig004242-cat_1_3	contig004242-cat_1	2	MF	Cysteine biosynthesis, methionine => cysteine	Organic Nitrogen	Amino Acid
contig004242	vOTU001684	contig004242_3	K00789	S-adenosylmethionine synthetase [EC:2.5.1.6] [RN:R00177]	contig004242-cat_1_3	contig004242-cat_1	2	MF	Methionine degradation	Organic Nitrogen	Amino Acid
contig004263	vOTU001697	contig004263_21	K01520	dUTP pyrophosphatase [EC:3.6.1.23] [RN:R02100]	contig004263-cat_1_21	contig004263-cat_1	2	M	Pyrimidine deoxyribonuleotide biosynthesis, CDP/CTP => dCDP/dCTP,dTDP/dTTP	MISC	Information systems
contig004346	vOTU001740	contig004346_24	K00558	DNA (cytosine-5-)-methyltransferase [EC:2.1.1.37] [RN:R04858]	contig004346-cat_1_24	contig004346-cat_1	2	M	Methionine degradation	Organic Nitrogen	Amino Acid
contig004360	vOTU001749	contig004360_60	K00937	polyphosphate kinase ???	contig004360-cat_1_60	contig004360-cat_1	1	M	Cytochrome d ubiquinol oxidase	Energy	Oxygen
contig004360	vOTU001749	contig004360_75	K01494	dCTP deaminase [EC:3.5.4.13] [RN:R02325]	contig004360-cat_1_75	contig004360-cat_1	1	M	Pyrimidine deoxyribonuleotide biosynthesis, CDP/CTP => dCDP/dCTP,dTDP/dTTP	MISC	Information systems
contig004360	vOTU001749	contig004360_111	K00525	ribonucleoside-diphosphate reductase [EC:1.17.4.1] [RN:R02024]	contig004360-cat_1_111	contig004360-cat_1	1	MKE	Pyrimidine deoxyribonuleotide biosynthesis, CDP/CTP => dCDP/dCTP,dTDP/dTTP	MISC	Information systems
contig004360	vOTU001749	contig004360_124	K00560	thymidylate synthase [EC:2.1.1.45] [RN:R02101]	contig004360-cat_1_124	contig004360-cat_1	1	M	Pyrimidine deoxyribonuleotide biosynthesis, CDP/CTP => dCDP/dCTP,dTDP/dTTP	MISC	Information systems
contig004405	vOTU001774	contig004405_6	K01520	dUTP pyrophosphatase [EC:3.6.1.23] [RN:R02100]	contig004405-cat_1_6	contig004405-cat_1	2	MF	Pyrimidine deoxyribonuleotide biosynthesis, CDP/CTP => dCDP/dCTP,dTDP/dTTP	MISC	Information systems
contig004405	vOTU001774	contig004405_44	K00525	ribonucleoside-diphosphate reductase [EC:1.17.4.1] [RN:R02024]	contig004405-cat_1_44	contig004405-cat_1	1	MKE	Pyrimidine deoxyribonuleotide biosynthesis, CDP/CTP => dCDP/dCTP,dTDP/dTTP	MISC	Information systems
contig004478	vOTU001796	contig004478_9	K00558	DNA (cytosine-5-)-methyltransferase [EC:2.1.1.37] [RN:R04858]	contig004478-cat_1_9	contig004478-cat_1	2	MF	Methionine degradation	Organic Nitrogen	Amino Acid
contig004492	vOTU001802	contig004492_58	K21636	ribonucleoside-triphosphate reductase [EC:1.17.4.2 1.1.98.6] [RN:R02022 R11636]	contig004492-cat_1_58	contig004492-cat_1	1	M	Pyrimidine deoxyribonuleotide biosynthesis, CDP/CTP => dCDP/dCTP,dTDP/dTTP	MISC	Information systems
contig004492	vOTU001802	contig004492_62	K01520	dUTP pyrophosphatase [EC:3.6.1.23] [RN:R02100]	contig004492-cat_1_62	contig004492-cat_1	1	M	Pyrimidine deoxyribonuleotide biosynthesis, CDP/CTP => dCDP/dCTP,dTDP/dTTP	MISC	Information systems
contig004496	vOTU001804	contig004496_27	K01520	dUTP pyrophosphatase [EC:3.6.1.23] [RN:R02100]	contig004496-cat_1_27	contig004496-cat_1	2	M	Pyrimidine deoxyribonuleotide biosynthesis, CDP/CTP => dCDP/dCTP,dTDP/dTTP	MISC	Information systems
contig004507	vOTU001808	contig004507_7	K00558	DNA (cytosine-5-)-methyltransferase [EC:2.1.1.37] [RN:R04858]	contig004507-cat_1_7	contig004507-cat_1	2	MF	Methionine degradation	Organic Nitrogen	Amino Acid
contig004507	vOTU001808	contig004507_9	K00789	S-adenosylmethionine synthetase [EC:2.5.1.6] [RN:R00177]	contig004507-cat_1_9	contig004507-cat_1	2	M	Cysteine biosynthesis, methionine => cysteine	Organic Nitrogen	Amino Acid
contig004507	vOTU001808	contig004507_9	K00789	S-adenosylmethionine synthetase [EC:2.5.1.6] [RN:R00177]	contig004507-cat_1_9	contig004507-cat_1	2	M	Methionine degradation	Organic Nitrogen	Amino Acid
contig004543	vOTU001821	contig004543_108	K01520	dUTP pyrophosphatase [EC:3.6.1.23] [RN:R02100]	contig004543-cat_1_108	contig004543-cat_1	2	M	Pyrimidine deoxyribonuleotide biosynthesis, CDP/CTP => dCDP/dCTP,dTDP/dTTP	MISC	Information systems
contig004543	vOTU001821	contig004543_115	K21636	ribonucleoside-triphosphate reductase [EC:1.17.4.2 1.1.98.6] [RN:R02022 R11636]	contig004543-cat_1_115	contig004543-cat_1	2	M	Pyrimidine deoxyribonuleotide biosynthesis, CDP/CTP => dCDP/dCTP,dTDP/dTTP	MISC	Information systems
contig004543	vOTU001821	contig004543_127	K00558	DNA (cytosine-5-)-methyltransferase [EC:2.1.1.37] [RN:R04858]	contig004543-cat_1_127	contig004543-cat_1	2	M	Methionine degradation	Organic Nitrogen	Amino Acid
contig004560	vOTU001829	contig004560_10	K01520	dUTP pyrophosphatase [EC:3.6.1.23] [RN:R02100]	contig004560-cat_2_10	contig004560-cat_2	3	MF	Pyrimidine deoxyribonuleotide biosynthesis, CDP/CTP => dCDP/dCTP,dTDP/dTTP	MISC	Information systems
contig004571	vOTU001832	contig004571_69	K01520	dUTP pyrophosphatase [EC:3.6.1.23] [RN:R02100]	contig004571-cat_1_69	contig004571-cat_1	2	M	Pyrimidine deoxyribonuleotide biosynthesis, CDP/CTP => dCDP/dCTP,dTDP/dTTP	MISC	Information systems
contig004571	vOTU001832	contig004571_75	K21636	ribonucleoside-triphosphate reductase [EC:1.17.4.2 1.1.98.6] [RN:R02022 R11636]	contig004571-cat_1_75	contig004571-cat_1	2	M	Pyrimidine deoxyribonuleotide biosynthesis, CDP/CTP => dCDP/dCTP,dTDP/dTTP	MISC	Information systems
contig004571	vOTU001832	contig004571_77	K21636	ribonucleoside-triphosphate reductase [EC:1.17.4.2 1.1.98.6] [RN:R02022 R11636]	contig004571-cat_1_77	contig004571-cat_1	2	M	Pyrimidine deoxyribonuleotide biosynthesis, CDP/CTP => dCDP/dCTP,dTDP/dTTP	MISC	Information systems
contig004571	vOTU001832	contig004571_114	K00558	DNA (cytosine-5-)-methyltransferase [EC:2.1.1.37] [RN:R04858]	contig004571-cat_1_114	contig004571-cat_1	2	M	Methionine degradation	Organic Nitrogen	Amino Acid
contig004582	vOTU001834	contig004582_33	K00558	DNA (cytosine-5-)-methyltransferase [EC:2.1.1.37] [RN:R04858]	contig004582-cat_1_33	contig004582-cat_1	2	MF	Methionine degradation	Organic Nitrogen	Amino Acid
contig004597	vOTU001843	contig004597_18	K00789	S-adenosylmethionine synthetase [EC:2.5.1.6] [RN:R00177]	contig004597-cat_1_18	contig004597-cat_1	2	M	Cysteine biosynthesis, methionine => cysteine	Organic Nitrogen	Amino Acid
contig004597	vOTU001843	contig004597_18	K00789	S-adenosylmethionine synthetase [EC:2.5.1.6] [RN:R00177]	contig004597-cat_1_18	contig004597-cat_1	2	M	Methionine degradation	Organic Nitrogen	Amino Acid
contig004597	vOTU001843	contig004597_21	K00558	DNA (cytosine-5-)-methyltransferase [EC:2.1.1.37] [RN:R04858]	contig004597-cat_1_21	contig004597-cat_1	2	M	Methionine degradation	Organic Nitrogen	Amino Acid
contig004650	vOTU001859	contig004650_27	K01520	dUTP pyrophosphatase [EC:3.6.1.23] [RN:R02100]	contig004650-cat_1_27	contig004650-cat_1	1	M	Pyrimidine deoxyribonuleotide biosynthesis, CDP/CTP => dCDP/dCTP,dTDP/dTTP	MISC	Information systems
contig004669	vOTU001866	contig004669_17	K21636	ribonucleoside-triphosphate reductase [EC:1.17.4.2 1.1.98.6] [RN:R02022 R11636]	contig004669-cat_1_17	contig004669-cat_1	2	M	Pyrimidine deoxyribonuleotide biosynthesis, CDP/CTP => dCDP/dCTP,dTDP/dTTP	MISC	Information systems
contig004669	vOTU001866	contig004669_29	K01520	dUTP pyrophosphatase [EC:3.6.1.23] [RN:R02100]	contig004669-cat_1_29	contig004669-cat_1	2	M	Pyrimidine deoxyribonuleotide biosynthesis, CDP/CTP => dCDP/dCTP,dTDP/dTTP	MISC	Information systems
contig004682	vOTU001872	contig004682_4	K01520	dUTP pyrophosphatase [EC:3.6.1.23] [RN:R02100]	contig004682-cat_1_4	contig004682-cat_1	2	MF	Pyrimidine deoxyribonuleotide biosynthesis, CDP/CTP => dCDP/dCTP,dTDP/dTTP	MISC	Information systems
contig004682	vOTU001872	contig004682_7	K21636	ribonucleoside-triphosphate reductase [EC:1.17.4.2 1.1.98.6] [RN:R02022 R11636]	contig004682-cat_1_7	contig004682-cat_1	2	MF	Pyrimidine deoxyribonuleotide biosynthesis, CDP/CTP => dCDP/dCTP,dTDP/dTTP	MISC	Information systems
contig004698	vOTU001880	contig004698_31	K01520	dUTP pyrophosphatase [EC:3.6.1.23] [RN:R02100]	contig004698-cat_2_31	contig004698-cat_2	3	M	Pyrimidine deoxyribonuleotide biosynthesis, CDP/CTP => dCDP/dCTP,dTDP/dTTP	MISC	Information systems
contig004733	vOTU001888	contig004733_18	K01520	dUTP pyrophosphatase [EC:3.6.1.23] [RN:R02100]	contig004733-cat_1_18	contig004733-cat_1	1	M	Pyrimidine deoxyribonuleotide biosynthesis, CDP/CTP => dCDP/dCTP,dTDP/dTTP	MISC	Information systems
contig004733	vOTU001888	contig004733_19	K00560	thymidylate synthase [EC:2.1.1.45] [RN:R02101]	contig004733-cat_1_19	contig004733-cat_1	1	M	Pyrimidine deoxyribonuleotide biosynthesis, CDP/CTP => dCDP/dCTP,dTDP/dTTP	MISC	Information systems
contig004753	vOTU001894	contig004753_50	K00525	ribonucleoside-diphosphate reductase [EC:1.17.4.1] [RN:R02024]	contig004753-cat_1_50	contig004753-cat_1	2	MKE	Pyrimidine deoxyribonuleotide biosynthesis, CDP/CTP => dCDP/dCTP,dTDP/dTTP	MISC	Information systems
contig004758	vOTU001898	contig004758_4	K00558	DNA (cytosine-5-)-methyltransferase [EC:2.1.1.37] [RN:R04858]	contig004758-cat_2_4	contig004758-cat_2	3	MF	Methionine degradation	Organic Nitrogen	Amino Acid
contig004770	vOTU001902	contig004770_15	K00558	DNA (cytosine-5-)-methyltransferase [EC:2.1.1.37] [RN:R04858]	contig004770-cat_1_15	contig004770-cat_1	2	M	Methionine degradation	Organic Nitrogen	Amino Acid
contig004844	vOTU061474	contig004844_16	K21636	ribonucleoside-triphosphate reductase [EC:1.17.4.2 1.1.98.6] [RN:R02022 R11636]	contig004844-cat_1_16	contig004844-cat_1	2	M	Pyrimidine deoxyribonuleotide biosynthesis, CDP/CTP => dCDP/dCTP,dTDP/dTTP	MISC	Information systems
contig005103	vOTU002001	contig005103_14	K01520	dUTP pyrophosphatase [EC:3.6.1.23] [RN:R02100]	contig005103-cat_1_14	contig005103-cat_1	2	M	Pyrimidine deoxyribonuleotide biosynthesis, CDP/CTP => dCDP/dCTP,dTDP/dTTP	MISC	Information systems
contig005103	vOTU002001	contig005103_15	K00558	DNA (cytosine-5-)-methyltransferase [EC:2.1.1.37] [RN:R04858]	contig005103-cat_1_15	contig005103-cat_1	2	M	Methionine degradation	Organic Nitrogen	Amino Acid
contig005164	vOTU002025	contig005164_42	K00558	DNA (cytosine-5-)-methyltransferase [EC:2.1.1.37] [RN:R04858]	contig005164-cat_1_42	contig005164-cat_1	1	MF	Methionine degradation	Organic Nitrogen	Amino Acid
contig005166	vOTU002027	contig005166_33	K00560	thymidylate synthase [EC:2.1.1.45] [RN:R02101]	contig005166-cat_1_33	contig005166-cat_1	2	MF	Pyrimidine deoxyribonuleotide biosynthesis, CDP/CTP => dCDP/dCTP,dTDP/dTTP	MISC	Information systems
contig005339	vOTU002090	contig005339_15	K01520	dUTP pyrophosphatase [EC:3.6.1.23] [RN:R02100]	contig005339-cat_1_15	contig005339-cat_1	1	M	Pyrimidine deoxyribonuleotide biosynthesis, CDP/CTP => dCDP/dCTP,dTDP/dTTP	MISC	Information systems
contig005404	vOTU002114	contig005404_6	K01520	dUTP pyrophosphatase [EC:3.6.1.23] [RN:R02100]	contig005404-cat_1_6	contig005404-cat_1	2	MF	Pyrimidine deoxyribonuleotide biosynthesis, CDP/CTP => dCDP/dCTP,dTDP/dTTP	MISC	Information systems
contig005456	vOTU002128	contig005456_55	K00560	thymidylate synthase [EC:2.1.1.45] [RN:R02101]	contig005456-cat_1_55	contig005456-cat_1	2	M	Pyrimidine deoxyribonuleotide biosynthesis, CDP/CTP => dCDP/dCTP,dTDP/dTTP	MISC	Information systems
contig005493	vOTU002142	contig005493_7	K01520	dUTP pyrophosphatase [EC:3.6.1.23] [RN:R02100]	contig005493-cat_1_7	contig005493-cat_1	1	M	Pyrimidine deoxyribonuleotide biosynthesis, CDP/CTP => dCDP/dCTP,dTDP/dTTP	MISC	Information systems
contig005493	vOTU002142	contig005493_9	K21636	ribonucleoside-triphosphate reductase [EC:1.17.4.2 1.1.98.6] [RN:R02022 R11636]	contig005493-cat_1_9	contig005493-cat_1	1	M	Pyrimidine deoxyribonuleotide biosynthesis, CDP/CTP => dCDP/dCTP,dTDP/dTTP	MISC	Information systems
contig005494	vOTU002143	contig005494_14	K00558	DNA (cytosine-5-)-methyltransferase [EC:2.1.1.37] [RN:R04858]	contig005494-cat_2_14	contig005494-cat_2	3	MF	Methionine degradation	Organic Nitrogen	Amino Acid
contig005509	vOTU002146	contig005509_77	K01520	dUTP pyrophosphatase [EC:3.6.1.23] [RN:R02100]	contig005509-cat_1_77	contig005509-cat_1	2	MF	Pyrimidine deoxyribonuleotide biosynthesis, CDP/CTP => dCDP/dCTP,dTDP/dTTP	MISC	Information systems
contig005637	vOTU002196	contig005637_23	K01494	dCTP deaminase [EC:3.5.4.13] [RN:R02325]	contig005637-cat_2_23	contig005637-cat_2	3	M	Pyrimidine deoxyribonuleotide biosynthesis, CDP/CTP => dCDP/dCTP,dTDP/dTTP	MISC	Information systems
contig005652	vOTU002202	contig005652_65	K00558	DNA (cytosine-5-)-methyltransferase [EC:2.1.1.37] [RN:R04858]	contig005652-cat_1_65	contig005652-cat_1	2	MF	Methionine degradation	Organic Nitrogen	Amino Acid
contig005662	vOTU002205	contig005662_8	K01939	adenylosuccinate synthase [EC:6.3.4.4] [RN:R01135]	contig005662-cat_1_8	contig005662-cat_1	2	MF	Adenine ribonucleotide biosynthesis, IMP => ADP,ATP	MISC	Information systems
contig005673	vOTU002211	contig005673_22	K21636	ribonucleoside-triphosphate reductase [EC:1.17.4.2 1.1.98.6] [RN:R02022 R11636]	contig005673-cat_1_22	contig005673-cat_1	1	M	Pyrimidine deoxyribonuleotide biosynthesis, CDP/CTP => dCDP/dCTP,dTDP/dTTP	MISC	Information systems
contig005745	vOTU002248	contig005745_30	K00640	serine O-acetyltransferase [EC:2.3.1.30] [RN:R00586]	contig005745-cat_1_30	contig005745-cat_1	1	M	Cysteine biosynthesis, serine => cysteine	Organic Nitrogen	Amino Acid
contig005773	vOTU002260	contig005773_23	K01520	dUTP pyrophosphatase [EC:3.6.1.23] [RN:R02100]	contig005773-cat_1_23	contig005773-cat_1	2	M	Pyrimidine deoxyribonuleotide biosynthesis, CDP/CTP => dCDP/dCTP,dTDP/dTTP	MISC	Information systems
contig005800	vOTU002276	contig005800_61	K01520	dUTP pyrophosphatase [EC:3.6.1.23] [RN:R02100]	contig005800-cat_1_61	contig005800-cat_1	2	M	Pyrimidine deoxyribonuleotide biosynthesis, CDP/CTP => dCDP/dCTP,dTDP/dTTP	MISC	Information systems
contig005842	vOTU002292	contig005842_9	K00558	DNA (cytosine-5-)-methyltransferase [EC:2.1.1.37] [RN:R04858]	contig005842-cat_1_9	contig005842-cat_1	2	MF	Methionine degradation	Organic Nitrogen	Amino Acid
contig005842	vOTU002292	contig005842_11	K00789	S-adenosylmethionine synthetase [EC:2.5.1.6] [RN:R00177]	contig005842-cat_1_11	contig005842-cat_1	2	MF	Cysteine biosynthesis, methionine => cysteine	Organic Nitrogen	Amino Acid
contig005842	vOTU002292	contig005842_11	K00789	S-adenosylmethionine synthetase [EC:2.5.1.6] [RN:R00177]	contig005842-cat_1_11	contig005842-cat_1	2	MF	Methionine degradation	Organic Nitrogen	Amino Acid
contig005845	vOTU002295	contig005845_72	K01520	dUTP pyrophosphatase [EC:3.6.1.23] [RN:R02100]	contig005845-cat_1_72	contig005845-cat_1	2	M	Pyrimidine deoxyribonuleotide biosynthesis, CDP/CTP => dCDP/dCTP,dTDP/dTTP	MISC	Information systems
contig005845	vOTU002295	contig005845_108	K21636	ribonucleoside-triphosphate reductase [EC:1.17.4.2 1.1.98.6] [RN:R02022 R11636]	contig005845-cat_1_108	contig005845-cat_1	1	M	Pyrimidine deoxyribonuleotide biosynthesis, CDP/CTP => dCDP/dCTP,dTDP/dTTP	MISC	Information systems
contig005847	vOTU002296	contig005847_30	K00560	thymidylate synthase [EC:2.1.1.45] [RN:R02101]	contig005847-cat_1_30	contig005847-cat_1	1	M	Pyrimidine deoxyribonuleotide biosynthesis, CDP/CTP => dCDP/dCTP,dTDP/dTTP	MISC	Information systems
contig005847	vOTU002296	contig005847_32	K01520	dUTP pyrophosphatase [EC:3.6.1.23] [RN:R02100]	contig005847-cat_1_32	contig005847-cat_1	1	M	Pyrimidine deoxyribonuleotide biosynthesis, CDP/CTP => dCDP/dCTP,dTDP/dTTP	MISC	Information systems
contig005883	vOTU002318	contig005883_5	K00558	DNA (cytosine-5-)-methyltransferase [EC:2.1.1.37] [RN:R04858]	contig005883-cat_1_5	contig005883-cat_1	2	MF	Methionine degradation	Organic Nitrogen	Amino Acid
contig005948	vOTU002351	contig005948_15	GT2	GT2 cellulose synthase (EC 2.4.1.12); chitin synthase (EC 2.4.1.16); dolichyl-phosphate beta-D-mannosyltransferase (EC 2.4.1.83); dolichyl-phosphate beta-glucosyltransferase (EC 2.4.1.117); N-acetylglucosaminyltransferase (EC 2.4.1.-); N-acetylgalactosaminyltransferase (EC 2.4.1.-); hyaluronan synthase (EC 2.4.1.212); chitin oligosaccharide synthase (EC 2.4.1.-); beta-1,3-glucan synthase (EC 2.4.…	contig005948-cat_1_15	contig005948-cat_1	2	M	GlycosylTransferases	carbon utilization	CAZY
contig005949	vOTU002352	contig005949_4	K01520	dUTP pyrophosphatase [EC:3.6.1.23] [RN:R02100]	contig005949-cat_1_4	contig005949-cat_1	2	MF	Pyrimidine deoxyribonuleotide biosynthesis, CDP/CTP => dCDP/dCTP,dTDP/dTTP	MISC	Information systems
contig005949	vOTU002352	contig005949_13	K00558	DNA (cytosine-5-)-methyltransferase [EC:2.1.1.37] [RN:R04858]	contig005949-cat_1_13	contig005949-cat_1	2	M	Methionine degradation	Organic Nitrogen	Amino Acid
contig005961	vOTU002361	contig005961_47	K01520	dUTP pyrophosphatase [EC:3.6.1.23] [RN:R02100]	contig005961-cat_1_47	contig005961-cat_1	2	M	Pyrimidine deoxyribonuleotide biosynthesis, CDP/CTP => dCDP/dCTP,dTDP/dTTP	MISC	Information systems
contig005961	vOTU002361	contig005961_87	GT2	GT2 cellulose synthase (EC 2.4.1.12); chitin synthase (EC 2.4.1.16); dolichyl-phosphate beta-D-mannosyltransferase (EC 2.4.1.83); dolichyl-phosphate beta-glucosyltransferase (EC 2.4.1.117); N-acetylglucosaminyltransferase (EC 2.4.1.-); N-acetylgalactosaminyltransferase (EC 2.4.1.-); hyaluronan synthase (EC 2.4.1.212); chitin oligosaccharide synthase (EC 2.4.1.-); beta-1,3-glucan synthase (EC 2.4.…	contig005961-cat_1_87	contig005961-cat_1	2	MF	GlycosylTransferases	carbon utilization	CAZY
contig005977	vOTU002374	contig005977_7	GT2	GT2 cellulose synthase (EC 2.4.1.12); chitin synthase (EC 2.4.1.16); dolichyl-phosphate beta-D-mannosyltransferase (EC 2.4.1.83); dolichyl-phosphate beta-glucosyltransferase (EC 2.4.1.117); N-acetylglucosaminyltransferase (EC 2.4.1.-); N-acetylgalactosaminyltransferase (EC 2.4.1.-); hyaluronan synthase (EC 2.4.1.212); chitin oligosaccharide synthase (EC 2.4.1.-); beta-1,3-glucan synthase (EC 2.4.…	contig005977-cat_1_7	contig005977-cat_1	1	MF	GlycosylTransferases	carbon utilization	CAZY
contig005990	vOTU002379	contig005990_22	K00789	S-adenosylmethionine synthetase [EC:2.5.1.6] [RN:R00177]	contig005990-cat_1_22	contig005990-cat_1	2	MF	Cysteine biosynthesis, methionine => cysteine	Organic Nitrogen	Amino Acid
contig005990	vOTU002379	contig005990_22	K00789	S-adenosylmethionine synthetase [EC:2.5.1.6] [RN:R00177]	contig005990-cat_1_22	contig005990-cat_1	2	MF	Methionine degradation	Organic Nitrogen	Amino Acid
contig006002	vOTU002387	contig006002_56	K21636	ribonucleoside-triphosphate reductase [EC:1.17.4.2 1.1.98.6] [RN:R02022 R11636]	contig006002-cat_1_56	contig006002-cat_1	2	MF	Pyrimidine deoxyribonuleotide biosynthesis, CDP/CTP => dCDP/dCTP,dTDP/dTTP	MISC	Information systems
contig006047	vOTU002417	contig006047_64	K01520	dUTP pyrophosphatase [EC:3.6.1.23] [RN:R02100]	contig006047-cat_1_64	contig006047-cat_1	2	M	Pyrimidine deoxyribonuleotide biosynthesis, CDP/CTP => dCDP/dCTP,dTDP/dTTP	MISC	Information systems
contig006047	vOTU002417	contig006047_92	K21636	ribonucleoside-triphosphate reductase [EC:1.17.4.2 1.1.98.6] [RN:R02022 R11636]	contig006047-cat_1_92	contig006047-cat_1	1	M	Pyrimidine deoxyribonuleotide biosynthesis, CDP/CTP => dCDP/dCTP,dTDP/dTTP	MISC	Information systems
contig006066	vOTU002429	contig006066_8	K00558	DNA (cytosine-5-)-methyltransferase [EC:2.1.1.37] [RN:R04858]	contig006066-cat_1_8	contig006066-cat_1	1	M	Methionine degradation	Organic Nitrogen	Amino Acid
contig006124	vOTU002460	contig006124_24	GT2	GT2 cellulose synthase (EC 2.4.1.12); chitin synthase (EC 2.4.1.16); dolichyl-phosphate beta-D-mannosyltransferase (EC 2.4.1.83); dolichyl-phosphate beta-glucosyltransferase (EC 2.4.1.117); N-acetylglucosaminyltransferase (EC 2.4.1.-); N-acetylgalactosaminyltransferase (EC 2.4.1.-); hyaluronan synthase (EC 2.4.1.212); chitin oligosaccharide synthase (EC 2.4.1.-); beta-1,3-glucan synthase (EC 2.4.…	contig006124-cat_1_24	contig006124-cat_1	1	M	GlycosylTransferases	carbon utilization	CAZY
contig006125	vOTU002461	contig006125_76	K01520	dUTP pyrophosphatase [EC:3.6.1.23] [RN:R02100]	contig006125-cat_1_76	contig006125-cat_1	1	M	Pyrimidine deoxyribonuleotide biosynthesis, CDP/CTP => dCDP/dCTP,dTDP/dTTP	MISC	Information systems
contig006125	vOTU002461	contig006125_80	K21636	ribonucleoside-triphosphate reductase [EC:1.17.4.2 1.1.98.6] [RN:R02022 R11636]	contig006125-cat_1_80	contig006125-cat_1	1	M	Pyrimidine deoxyribonuleotide biosynthesis, CDP/CTP => dCDP/dCTP,dTDP/dTTP	MISC	Information systems
contig006125	vOTU002461	contig006125_82	K21636	ribonucleoside-triphosphate reductase [EC:1.17.4.2 1.1.98.6] [RN:R02022 R11636]	contig006125-cat_1_82	contig006125-cat_1	1	M	Pyrimidine deoxyribonuleotide biosynthesis, CDP/CTP => dCDP/dCTP,dTDP/dTTP	MISC	Information systems
contig006125	vOTU002461	contig006125_103	K00558	DNA (cytosine-5-)-methyltransferase [EC:2.1.1.37] [RN:R04858]	contig006125-cat_1_103	contig006125-cat_1	1	M	Methionine degradation	Organic Nitrogen	Amino Acid
contig006185	vOTU002494	contig006185_101	K01520	dUTP pyrophosphatase [EC:3.6.1.23] [RN:R02100]	contig006185-cat_1_101	contig006185-cat_1	2	M	Pyrimidine deoxyribonuleotide biosynthesis, CDP/CTP => dCDP/dCTP,dTDP/dTTP	MISC	Information systems
contig006187	vOTU002495	contig006187_21	K01520	dUTP pyrophosphatase [EC:3.6.1.23] [RN:R02100]	contig006187-cat_1_21	contig006187-cat_1	2	M	Pyrimidine deoxyribonuleotide biosynthesis, CDP/CTP => dCDP/dCTP,dTDP/dTTP	MISC	Information systems
contig006194	vOTU021311	contig006194_38	K01520	dUTP pyrophosphatase [EC:3.6.1.23] [RN:R02100]	contig006194-cat_1_38	contig006194-cat_1	2	M	Pyrimidine deoxyribonuleotide biosynthesis, CDP/CTP => dCDP/dCTP,dTDP/dTTP	MISC	Information systems
contig006196	vOTU002500	contig006196_56	K01520	dUTP pyrophosphatase [EC:3.6.1.23] [RN:R02100]	contig006196-cat_1_56	contig006196-cat_1	1	M	Pyrimidine deoxyribonuleotide biosynthesis, CDP/CTP => dCDP/dCTP,dTDP/dTTP	MISC	Information systems
contig006222	vOTU002511	contig006222_62	K21636	ribonucleoside-triphosphate reductase [EC:1.17.4.2 1.1.98.6] [RN:R02022 R11636]	contig006222-cat_1_62	contig006222-cat_1	2	M	Pyrimidine deoxyribonuleotide biosynthesis, CDP/CTP => dCDP/dCTP,dTDP/dTTP	MISC	Information systems
contig006222	vOTU002511	contig006222_69	K01520	dUTP pyrophosphatase [EC:3.6.1.23] [RN:R02100]	contig006222-cat_1_69	contig006222-cat_1	2	M	Pyrimidine deoxyribonuleotide biosynthesis, CDP/CTP => dCDP/dCTP,dTDP/dTTP	MISC	Information systems
contig006286	vOTU002549	contig006286_10	GT2	GT2 cellulose synthase (EC 2.4.1.12); chitin synthase (EC 2.4.1.16); dolichyl-phosphate beta-D-mannosyltransferase (EC 2.4.1.83); dolichyl-phosphate beta-glucosyltransferase (EC 2.4.1.117); N-acetylglucosaminyltransferase (EC 2.4.1.-); N-acetylgalactosaminyltransferase (EC 2.4.1.-); hyaluronan synthase (EC 2.4.1.212); chitin oligosaccharide synthase (EC 2.4.1.-); beta-1,3-glucan synthase (EC 2.4.…	contig006286-cat_1_10	contig006286-cat_1	1	MF	GlycosylTransferases	carbon utilization	CAZY
contig006322	vOTU002566	contig006322_6	K01520	dUTP pyrophosphatase [EC:3.6.1.23] [RN:R02100]	contig006322-cat_1_6	contig006322-cat_1	2	M	Pyrimidine deoxyribonuleotide biosynthesis, CDP/CTP => dCDP/dCTP,dTDP/dTTP	MISC	Information systems
contig006322	vOTU002566	contig006322_11	K21636	ribonucleoside-triphosphate reductase [EC:1.17.4.2 1.1.98.6] [RN:R02022 R11636]	contig006322-cat_1_11	contig006322-cat_1	2	M	Pyrimidine deoxyribonuleotide biosynthesis, CDP/CTP => dCDP/dCTP,dTDP/dTTP	MISC	Information systems
contig006416	vOTU002611	contig006416_42	K01520	dUTP pyrophosphatase [EC:3.6.1.23] [RN:R02100]	contig006416-cat_1_42	contig006416-cat_1	2	M	Pyrimidine deoxyribonuleotide biosynthesis, CDP/CTP => dCDP/dCTP,dTDP/dTTP	MISC	Information systems
contig006420	vOTU002614	contig006420_29	K00558	DNA (cytosine-5-)-methyltransferase [EC:2.1.1.37] [RN:R04858]	contig006420-cat_1_29	contig006420-cat_1	2	M	Methionine degradation	Organic Nitrogen	Amino Acid
contig006436	vOTU002620	contig006436_46	K00558	DNA (cytosine-5-)-methyltransferase [EC:2.1.1.37] [RN:R04858]	contig006436-cat_1_46	contig006436-cat_1	1	M	Methionine degradation	Organic Nitrogen	Amino Acid
contig006437	vOTU002621	contig006437_68	K21636	ribonucleoside-triphosphate reductase [EC:1.17.4.2 1.1.98.6] [RN:R02022 R11636]	contig006437-cat_1_68	contig006437-cat_1	2	M	Pyrimidine deoxyribonuleotide biosynthesis, CDP/CTP => dCDP/dCTP,dTDP/dTTP	MISC	Information systems
contig006437	vOTU002621	contig006437_94	K01520	dUTP pyrophosphatase [EC:3.6.1.23] [RN:R02100]	contig006437-cat_1_94	contig006437-cat_1	2	M	Pyrimidine deoxyribonuleotide biosynthesis, CDP/CTP => dCDP/dCTP,dTDP/dTTP	MISC	Information systems
contig006481	vOTU002641	contig006481_14	K00558	DNA (cytosine-5-)-methyltransferase [EC:2.1.1.37] [RN:R04858]	contig006481-cat_1_14	contig006481-cat_1	2	M	Methionine degradation	Organic Nitrogen	Amino Acid
contig006512	vOTU002654	contig006512_33	GT2	GT2 cellulose synthase (EC 2.4.1.12); chitin synthase (EC 2.4.1.16); dolichyl-phosphate beta-D-mannosyltransferase (EC 2.4.1.83); dolichyl-phosphate beta-glucosyltransferase (EC 2.4.1.117); N-acetylglucosaminyltransferase (EC 2.4.1.-); N-acetylgalactosaminyltransferase (EC 2.4.1.-); hyaluronan synthase (EC 2.4.1.212); chitin oligosaccharide synthase (EC 2.4.1.-); beta-1,3-glucan synthase (EC 2.4.…	contig006512-cat_1_33	contig006512-cat_1	2	M	GlycosylTransferases	carbon utilization	CAZY
contig006536	vOTU002670	contig006536_4	K01520	dUTP pyrophosphatase [EC:3.6.1.23] [RN:R02100]	contig006536-cat_1_4	contig006536-cat_1	1	MF	Pyrimidine deoxyribonuleotide biosynthesis, CDP/CTP => dCDP/dCTP,dTDP/dTTP	MISC	Information systems
contig006536	vOTU002670	contig006536_11	K00525	ribonucleoside-diphosphate reductase [EC:1.17.4.1] [RN:R02024]	contig006536-cat_1_11	contig006536-cat_1	1	MKE	Pyrimidine deoxyribonuleotide biosynthesis, CDP/CTP => dCDP/dCTP,dTDP/dTTP	MISC	Information systems
contig006536	vOTU002670	contig006536_53	K01939	adenylosuccinate synthase [EC:6.3.4.4] [RN:R01135]	contig006536-cat_1_53	contig006536-cat_1	1	M	Adenine ribonucleotide biosynthesis, IMP => ADP,ATP	MISC	Information systems
contig006565	vOTU002688	contig006565_56	K01520	dUTP pyrophosphatase [EC:3.6.1.23] [RN:R02100]	contig006565-cat_1_56	contig006565-cat_1	1	M	Pyrimidine deoxyribonuleotide biosynthesis, CDP/CTP => dCDP/dCTP,dTDP/dTTP	MISC	Information systems
contig006577	vOTU002693	contig006577_16	K00558	DNA (cytosine-5-)-methyltransferase [EC:2.1.1.37] [RN:R04858]	contig006577-cat_1_16	contig006577-cat_1	2	M	Methionine degradation	Organic Nitrogen	Amino Acid
contig006577	vOTU002693	contig006577_95	K21636	ribonucleoside-triphosphate reductase [EC:1.17.4.2 1.1.98.6] [RN:R02022 R11636]	contig006577-cat_1_95	contig006577-cat_1	1	M	Pyrimidine deoxyribonuleotide biosynthesis, CDP/CTP => dCDP/dCTP,dTDP/dTTP	MISC	Information systems
contig006599	vOTU002702	contig006599_20	K01520	dUTP pyrophosphatase [EC:3.6.1.23] [RN:R02100]	contig006599-cat_1_20	contig006599-cat_1	2	MF	Pyrimidine deoxyribonuleotide biosynthesis, CDP/CTP => dCDP/dCTP,dTDP/dTTP	MISC	Information systems
contig006602	vOTU002704	contig006602_23	GT2	GT2 cellulose synthase (EC 2.4.1.12); chitin synthase (EC 2.4.1.16); dolichyl-phosphate beta-D-mannosyltransferase (EC 2.4.1.83); dolichyl-phosphate beta-glucosyltransferase (EC 2.4.1.117); N-acetylglucosaminyltransferase (EC 2.4.1.-); N-acetylgalactosaminyltransferase (EC 2.4.1.-); hyaluronan synthase (EC 2.4.1.212); chitin oligosaccharide synthase (EC 2.4.1.-); beta-1,3-glucan synthase (EC 2.4.…	contig006602-cat_1_23	contig006602-cat_1	2	MF	GlycosylTransferases	carbon utilization	CAZY
contig006633	vOTU002721	contig006633_25	K01520	dUTP pyrophosphatase [EC:3.6.1.23] [RN:R02100]	contig006633-cat_2_25	contig006633-cat_2	3	M	Pyrimidine deoxyribonuleotide biosynthesis, CDP/CTP => dCDP/dCTP,dTDP/dTTP	MISC	Information systems
contig006700	vOTU002746	contig006700_39	K21636	ribonucleoside-triphosphate reductase [EC:1.17.4.2 1.1.98.6] [RN:R02022 R11636]	contig006700-cat_1_39	contig006700-cat_1	1	M	Pyrimidine deoxyribonuleotide biosynthesis, CDP/CTP => dCDP/dCTP,dTDP/dTTP	MISC	Information systems
contig006720	vOTU002755	contig006720_85	K01520	dUTP pyrophosphatase [EC:3.6.1.23] [RN:R02100]	contig006720-cat_1_85	contig006720-cat_1	1	M	Pyrimidine deoxyribonuleotide biosynthesis, CDP/CTP => dCDP/dCTP,dTDP/dTTP	MISC	Information systems
contig006727	vOTU002760	contig006727_34	K00558	DNA (cytosine-5-)-methyltransferase [EC:2.1.1.37] [RN:R04858]	contig006727-cat_1_34	contig006727-cat_1	2	M	Methionine degradation	Organic Nitrogen	Amino Acid
contig006766	vOTU002778	contig006766_20	K01520	dUTP pyrophosphatase [EC:3.6.1.23] [RN:R02100]	contig006766-cat_1_20	contig006766-cat_1	2	MF	Pyrimidine deoxyribonuleotide biosynthesis, CDP/CTP => dCDP/dCTP,dTDP/dTTP	MISC	Information systems
contig006770	vOTU002782	contig006770_8	K00558	DNA (cytosine-5-)-methyltransferase [EC:2.1.1.37] [RN:R04858]	contig006770-cat_1_8	contig006770-cat_1	2	MF	Methionine degradation	Organic Nitrogen	Amino Acid
contig006824	vOTU002809	contig006824_71	K01520	dUTP pyrophosphatase [EC:3.6.1.23] [RN:R02100]	contig006824-cat_1_71	contig006824-cat_1	2	M	Pyrimidine deoxyribonuleotide biosynthesis, CDP/CTP => dCDP/dCTP,dTDP/dTTP	MISC	Information systems
contig006824	vOTU002809	contig006824_73	K21636	ribonucleoside-triphosphate reductase [EC:1.17.4.2 1.1.98.6] [RN:R02022 R11636]	contig006824-cat_1_73	contig006824-cat_1	2	M	Pyrimidine deoxyribonuleotide biosynthesis, CDP/CTP => dCDP/dCTP,dTDP/dTTP	MISC	Information systems
contig006841	vOTU002818	contig006841_31	K21636	ribonucleoside-triphosphate reductase [EC:1.17.4.2 1.1.98.6] [RN:R02022 R11636]	contig006841-cat_1_31	contig006841-cat_1	1	M	Pyrimidine deoxyribonuleotide biosynthesis, CDP/CTP => dCDP/dCTP,dTDP/dTTP	MISC	Information systems
contig006861	vOTU002826	contig006861_13	K00558	DNA (cytosine-5-)-methyltransferase [EC:2.1.1.37] [RN:R04858]	contig006861-cat_2_13	contig006861-cat_2	3	MF	Methionine degradation	Organic Nitrogen	Amino Acid
contig006875	vOTU002833	contig006875_41	K00558	DNA (cytosine-5-)-methyltransferase [EC:2.1.1.37] [RN:R04858]	contig006875-cat_1_41	contig006875-cat_1	2	M	Methionine degradation	Organic Nitrogen	Amino Acid
contig006875	vOTU002833	contig006875_106	K01520	dUTP pyrophosphatase [EC:3.6.1.23] [RN:R02100]	contig006875-cat_1_106	contig006875-cat_1	2	M	Pyrimidine deoxyribonuleotide biosynthesis, CDP/CTP => dCDP/dCTP,dTDP/dTTP	MISC	Information systems
contig006882	vOTU002837	contig006882_9	K01520	dUTP pyrophosphatase [EC:3.6.1.23] [RN:R02100]	contig006882-cat_2_9	contig006882-cat_2	3	MF	Pyrimidine deoxyribonuleotide biosynthesis, CDP/CTP => dCDP/dCTP,dTDP/dTTP	MISC	Information systems
contig006894	vOTU002845	contig006894_5	K00789	S-adenosylmethionine synthetase [EC:2.5.1.6] [RN:R00177]	contig006894-cat_1_5	contig006894-cat_1	2	MF	Cysteine biosynthesis, methionine => cysteine	Organic Nitrogen	Amino Acid
contig006894	vOTU002845	contig006894_5	K00789	S-adenosylmethionine synthetase [EC:2.5.1.6] [RN:R00177]	contig006894-cat_1_5	contig006894-cat_1	2	MF	Methionine degradation	Organic Nitrogen	Amino Acid
contig006894	vOTU002845	contig006894_7	K00558	DNA (cytosine-5-)-methyltransferase [EC:2.1.1.37] [RN:R04858]	contig006894-cat_1_7	contig006894-cat_1	2	MF	Methionine degradation	Organic Nitrogen	Amino Acid
contig006916	vOTU002858	contig006916_24	K21636	ribonucleoside-triphosphate reductase [EC:1.17.4.2 1.1.98.6] [RN:R02022 R11636]	contig006916-cat_1_24	contig006916-cat_1	1	M	Pyrimidine deoxyribonuleotide biosynthesis, CDP/CTP => dCDP/dCTP,dTDP/dTTP	MISC	Information systems
contig006944	vOTU002876	contig006944_28	K00560	thymidylate synthase [EC:2.1.1.45] [RN:R02101]	contig006944-cat_1_28	contig006944-cat_1	2	M	Pyrimidine deoxyribonuleotide biosynthesis, CDP/CTP => dCDP/dCTP,dTDP/dTTP	MISC	Information systems
contig006944	vOTU002876	contig006944_69	K00789	S-adenosylmethionine synthetase [EC:2.5.1.6] [RN:R00177]	contig006944-cat_1_69	contig006944-cat_1	2	MF	Cysteine biosynthesis, methionine => cysteine	Organic Nitrogen	Amino Acid
contig006944	vOTU002876	contig006944_69	K00789	S-adenosylmethionine synthetase [EC:2.5.1.6] [RN:R00177]	contig006944-cat_1_69	contig006944-cat_1	2	MF	Methionine degradation	Organic Nitrogen	Amino Acid
contig006950	vOTU002881	contig006950_108	K01520	dUTP pyrophosphatase [EC:3.6.1.23] [RN:R02100]	contig006950-cat_1_108	contig006950-cat_1	1	M	Pyrimidine deoxyribonuleotide biosynthesis, CDP/CTP => dCDP/dCTP,dTDP/dTTP	MISC	Information systems
contig006950	vOTU002881	contig006950_140	K21636	ribonucleoside-triphosphate reductase [EC:1.17.4.2 1.1.98.6] [RN:R02022 R11636]	contig006950-cat_1_140	contig006950-cat_1	1	M	Pyrimidine deoxyribonuleotide biosynthesis, CDP/CTP => dCDP/dCTP,dTDP/dTTP	MISC	Information systems
contig006953	vOTU002882	contig006953_40	K01520	dUTP pyrophosphatase [EC:3.6.1.23] [RN:R02100]	contig006953-cat_1_40	contig006953-cat_1	1	M	Pyrimidine deoxyribonuleotide biosynthesis, CDP/CTP => dCDP/dCTP,dTDP/dTTP	MISC	Information systems
contig006969	vOTU002897	contig006969_39	K01520	dUTP pyrophosphatase [EC:3.6.1.23] [RN:R02100]	contig006969-cat_1_39	contig006969-cat_1	1	M	Pyrimidine deoxyribonuleotide biosynthesis, CDP/CTP => dCDP/dCTP,dTDP/dTTP	MISC	Information systems
contig006969	vOTU002897	contig006969_40	K00525	ribonucleoside-diphosphate reductase [EC:1.17.4.1] [RN:R02024]	contig006969-cat_1_40	contig006969-cat_1	1	MKE	Pyrimidine deoxyribonuleotide biosynthesis, CDP/CTP => dCDP/dCTP,dTDP/dTTP	MISC	Information systems
contig007002	vOTU002919	contig007002_12	K00558	DNA (cytosine-5-)-methyltransferase [EC:2.1.1.37] [RN:R04858]	contig007002-cat_2_12	contig007002-cat_2	3	M	Methionine degradation	Organic Nitrogen	Amino Acid
contig007051	vOTU002948	contig007051_106	K00558	DNA (cytosine-5-)-methyltransferase [EC:2.1.1.37] [RN:R04858]	contig007051-cat_1_106	contig007051-cat_1	2	M	Methionine degradation	Organic Nitrogen	Amino Acid
contig007051	vOTU002948	contig007051_120	K01520	dUTP pyrophosphatase [EC:3.6.1.23] [RN:R02100]	contig007051-cat_1_120	contig007051-cat_1	2	MF	Pyrimidine deoxyribonuleotide biosynthesis, CDP/CTP => dCDP/dCTP,dTDP/dTTP	MISC	Information systems
contig007088	vOTU002963	contig007088_54	K00558	DNA (cytosine-5-)-methyltransferase [EC:2.1.1.37] [RN:R04858]	contig007088-cat_1_54	contig007088-cat_1	2	MF	Methionine degradation	Organic Nitrogen	Amino Acid
contig007108	vOTU002971	contig007108_8	K01520	dUTP pyrophosphatase [EC:3.6.1.23] [RN:R02100]	contig007108-cat_1_8	contig007108-cat_1	2	MF	Pyrimidine deoxyribonuleotide biosynthesis, CDP/CTP => dCDP/dCTP,dTDP/dTTP	MISC	Information systems
contig007117	vOTU002977	contig007117_21	K21636	ribonucleoside-triphosphate reductase [EC:1.17.4.2 1.1.98.6] [RN:R02022 R11636]	contig007117-cat_1_21	contig007117-cat_1	2	M	Pyrimidine deoxyribonuleotide biosynthesis, CDP/CTP => dCDP/dCTP,dTDP/dTTP	MISC	Information systems
contig007117	vOTU002977	contig007117_23	K01520	dUTP pyrophosphatase [EC:3.6.1.23] [RN:R02100]	contig007117-cat_1_23	contig007117-cat_1	2	M	Pyrimidine deoxyribonuleotide biosynthesis, CDP/CTP => dCDP/dCTP,dTDP/dTTP	MISC	Information systems
contig007117	vOTU002977	contig007117_52	U69	Self-processing occurs at the Ser846|+|Ala bond.	contig007117-cat_1_52	contig007117-cat_1	1	MF	Self-processing peptidases	Organic Nitrogen	Peptidase
contig007124	vOTU002982	contig007124_60	K01494	dCTP deaminase [EC:3.5.4.13] [RN:R02325]	contig007124-cat_1_60	contig007124-cat_1	2	M	Pyrimidine deoxyribonuleotide biosynthesis, CDP/CTP => dCDP/dCTP,dTDP/dTTP	MISC	Information systems
contig007133	vOTU002989	contig007133_184	K01520	dUTP pyrophosphatase [EC:3.6.1.23] [RN:R02100]	contig007133-cat_1_184	contig007133-cat_1	2	MF	Pyrimidine deoxyribonuleotide biosynthesis, CDP/CTP => dCDP/dCTP,dTDP/dTTP	MISC	Information systems
contig007316	vOTU003101	contig007316_3	K01520	dUTP pyrophosphatase [EC:3.6.1.23] [RN:R02100]	contig007316-cat_1_3	contig007316-cat_1	2	MF	Pyrimidine deoxyribonuleotide biosynthesis, CDP/CTP => dCDP/dCTP,dTDP/dTTP	MISC	Information systems
contig007322	vOTU003106	contig007322_45	K00558	DNA (cytosine-5-)-methyltransferase [EC:2.1.1.37] [RN:R04858]	contig007322-cat_1_45	contig007322-cat_1	1	M	Methionine degradation	Organic Nitrogen	Amino Acid
contig007328	vOTU003110	contig007328_12	K00558	DNA (cytosine-5-)-methyltransferase [EC:2.1.1.37] [RN:R04858]	contig007328-cat_1_12	contig007328-cat_1	1	M	Methionine degradation	Organic Nitrogen	Amino Acid
contig007362	vOTU003135	contig007362_4	K00558	DNA (cytosine-5-)-methyltransferase [EC:2.1.1.37] [RN:R04858]	contig007362-cat_1_4	contig007362-cat_1	2	MF	Methionine degradation	Organic Nitrogen	Amino Acid
contig007372	vOTU003139	contig007372_40	K21636	ribonucleoside-triphosphate reductase [EC:1.17.4.2 1.1.98.6] [RN:R02022 R11636]	contig007372-cat_1_40	contig007372-cat_1	1	M	Pyrimidine deoxyribonuleotide biosynthesis, CDP/CTP => dCDP/dCTP,dTDP/dTTP	MISC	Information systems
contig007380	vOTU003142	contig007380_22	K01520	dUTP pyrophosphatase [EC:3.6.1.23] [RN:R02100]	contig007380-cat_1_22	contig007380-cat_1	1	M	Pyrimidine deoxyribonuleotide biosynthesis, CDP/CTP => dCDP/dCTP,dTDP/dTTP	MISC	Information systems
contig007419	vOTU003170	contig007419_43	K01520	dUTP pyrophosphatase [EC:3.6.1.23] [RN:R02100]	contig007419-cat_1_43	contig007419-cat_1	1	M	Pyrimidine deoxyribonuleotide biosynthesis, CDP/CTP => dCDP/dCTP,dTDP/dTTP	MISC	Information systems
contig007450	vOTU003268	contig007450_13	K01520	dUTP pyrophosphatase [EC:3.6.1.23] [RN:R02100]	contig007450-cat_1_13	contig007450-cat_1	2	M	Pyrimidine deoxyribonuleotide biosynthesis, CDP/CTP => dCDP/dCTP,dTDP/dTTP	MISC	Information systems
contig007450	vOTU003268	contig007450_15	K00525	ribonucleoside-diphosphate reductase [EC:1.17.4.1] [RN:R02024]	contig007450-cat_1_15	contig007450-cat_1	2	MKE	Pyrimidine deoxyribonuleotide biosynthesis, CDP/CTP => dCDP/dCTP,dTDP/dTTP	MISC	Information systems
contig007452	vOTU003195	contig007452_3	K01520	dUTP pyrophosphatase [EC:3.6.1.23] [RN:R02100]	contig007452-cat_1_3	contig007452-cat_1	2	MF	Pyrimidine deoxyribonuleotide biosynthesis, CDP/CTP => dCDP/dCTP,dTDP/dTTP	MISC	Information systems
contig007495	vOTU003221	contig007495_19	K00560	thymidylate synthase [EC:2.1.1.45] [RN:R02101]	contig007495-cat_2_19	contig007495-cat_2	3	MF	Pyrimidine deoxyribonuleotide biosynthesis, CDP/CTP => dCDP/dCTP,dTDP/dTTP	MISC	Information systems
contig007510	vOTU003232	contig007510_100	K01520	dUTP pyrophosphatase [EC:3.6.1.23] [RN:R02100]	contig007510-cat_1_100	contig007510-cat_1	2	M	Pyrimidine deoxyribonuleotide biosynthesis, CDP/CTP => dCDP/dCTP,dTDP/dTTP	MISC	Information systems
contig007556	vOTU003256	contig007556_10	K01520	dUTP pyrophosphatase [EC:3.6.1.23] [RN:R02100]	contig007556-cat_2_10	contig007556-cat_2	3	MF	Pyrimidine deoxyribonuleotide biosynthesis, CDP/CTP => dCDP/dCTP,dTDP/dTTP	MISC	Information systems
contig007570	vOTU003264	contig007570_43	K00560	thymidylate synthase [EC:2.1.1.45] [RN:R02101]	contig007570-cat_1_43	contig007570-cat_1	2	M	Pyrimidine deoxyribonuleotide biosynthesis, CDP/CTP => dCDP/dCTP,dTDP/dTTP	MISC	Information systems
contig007576	vOTU003267	contig007576_43	K00558	DNA (cytosine-5-)-methyltransferase [EC:2.1.1.37] [RN:R04858]	contig007576-cat_1_43	contig007576-cat_1	2	M	Methionine degradation	Organic Nitrogen	Amino Acid
contig007597	vOTU003278	contig007597_3	GT2	GT2 cellulose synthase (EC 2.4.1.12); chitin synthase (EC 2.4.1.16); dolichyl-phosphate beta-D-mannosyltransferase (EC 2.4.1.83); dolichyl-phosphate beta-glucosyltransferase (EC 2.4.1.117); N-acetylglucosaminyltransferase (EC 2.4.1.-); N-acetylgalactosaminyltransferase (EC 2.4.1.-); hyaluronan synthase (EC 2.4.1.212); chitin oligosaccharide synthase (EC 2.4.1.-); beta-1,3-glucan synthase (EC 2.4.…	contig007597-cat_1_3	contig007597-cat_1	2	MF	GlycosylTransferases	carbon utilization	CAZY
contig007597	vOTU003278	contig007597_122	K00560	thymidylate synthase [EC:2.1.1.45] [RN:R02101]	contig007597-cat_1_122	contig007597-cat_1	2	M	Pyrimidine deoxyribonuleotide biosynthesis, CDP/CTP => dCDP/dCTP,dTDP/dTTP	MISC	Information systems
contig007606	vOTU003284	contig007606_47	K00558	DNA (cytosine-5-)-methyltransferase [EC:2.1.1.37] [RN:R04858]	contig007606-cat_1_47	contig007606-cat_1	1	M	Methionine degradation	Organic Nitrogen	Amino Acid
contig007618	vOTU003291	contig007618_16	K00558	DNA (cytosine-5-)-methyltransferase [EC:2.1.1.37] [RN:R04858]	contig007618-cat_2_16	contig007618-cat_2	3	M	Methionine degradation	Organic Nitrogen	Amino Acid
contig007623	vOTU003296	contig007623_6	K00558	DNA (cytosine-5-)-methyltransferase [EC:2.1.1.37] [RN:R04858]	contig007623-cat_1_6	contig007623-cat_1	2	MF	Methionine degradation	Organic Nitrogen	Amino Acid
contig007638	vOTU003306	contig007638_76	K01520	dUTP pyrophosphatase [EC:3.6.1.23] [RN:R02100]	contig007638-cat_1_76	contig007638-cat_1	2	M	Pyrimidine deoxyribonuleotide biosynthesis, CDP/CTP => dCDP/dCTP,dTDP/dTTP	MISC	Information systems
contig007638	vOTU003306	contig007638_83	K21636	ribonucleoside-triphosphate reductase [EC:1.17.4.2 1.1.98.6] [RN:R02022 R11636]	contig007638-cat_1_83	contig007638-cat_1	2	M	Pyrimidine deoxyribonuleotide biosynthesis, CDP/CTP => dCDP/dCTP,dTDP/dTTP	MISC	Information systems
contig007704	vOTU003348	contig007704_9	K01520	dUTP pyrophosphatase [EC:3.6.1.23] [RN:R02100]	contig007704-cat_1_9	contig007704-cat_1	2	MF	Pyrimidine deoxyribonuleotide biosynthesis, CDP/CTP => dCDP/dCTP,dTDP/dTTP	MISC	Information systems
contig007717	vOTU003356	contig007717_21	K00558	DNA (cytosine-5-)-methyltransferase [EC:2.1.1.37] [RN:R04858]	contig007717-cat_1_21	contig007717-cat_1	2	M	Methionine degradation	Organic Nitrogen	Amino Acid
contig007751	vOTU003379	contig007751_20	K01520	dUTP pyrophosphatase [EC:3.6.1.23] [RN:R02100]	contig007751-cat_1_20	contig007751-cat_1	2	M	Pyrimidine deoxyribonuleotide biosynthesis, CDP/CTP => dCDP/dCTP,dTDP/dTTP	MISC	Information systems
contig007769	vOTU003389	contig007769_3	K00558	DNA (cytosine-5-)-methyltransferase [EC:2.1.1.37] [RN:R04858]	contig007769-cat_1_3	contig007769-cat_1	2	MF	Methionine degradation	Organic Nitrogen	Amino Acid
contig007879	vOTU009085	contig007879_7	K01520	dUTP pyrophosphatase [EC:3.6.1.23] [RN:R02100]	contig007879-cat_1_7	contig007879-cat_1	1	M	Pyrimidine deoxyribonuleotide biosynthesis, CDP/CTP => dCDP/dCTP,dTDP/dTTP	MISC	Information systems
contig007882	vOTU003442	contig007882_24	S51	Catlytic type: Serine; hydrolyses Asp-Xaa dipeptides in which Xaa is not Glu, Asn or Gln; nutritional function in bacteria	contig007882-cat_1_24	contig007882-cat_1	2	M	Exopeptidases that hydrolyse alpha-aspartyl bonds	Organic Nitrogen	Peptidase
contig007954	vOTU003459	contig007954_6	K21636	ribonucleoside-triphosphate reductase [EC:1.17.4.2 1.1.98.6] [RN:R02022 R11636]	contig007954-cat_1_6	contig007954-cat_1	2	MF	Pyrimidine deoxyribonuleotide biosynthesis, CDP/CTP => dCDP/dCTP,dTDP/dTTP	MISC	Information systems
contig007963	vOTU010881	contig007963_62	K21636	ribonucleoside-triphosphate reductase [EC:1.17.4.2 1.1.98.6] [RN:R02022 R11636]	contig007963-cat_1_62	contig007963-cat_1	1	M	Pyrimidine deoxyribonuleotide biosynthesis, CDP/CTP => dCDP/dCTP,dTDP/dTTP	MISC	Information systems
contig007963	vOTU010881	contig007963_69	K01520	dUTP pyrophosphatase [EC:3.6.1.23] [RN:R02100]	contig007963-cat_1_69	contig007963-cat_1	1	M	Pyrimidine deoxyribonuleotide biosynthesis, CDP/CTP => dCDP/dCTP,dTDP/dTTP	MISC	Information systems
contig007978	vOTU003466	contig007978_82	K00525	ribonucleoside-diphosphate reductase [EC:1.17.4.1] [RN:R02024]	contig007978-cat_1_82	contig007978-cat_1	1	MKE	Pyrimidine deoxyribonuleotide biosynthesis, CDP/CTP => dCDP/dCTP,dTDP/dTTP	MISC	Information systems
contig008005	vOTU003470	contig008005_3	K00558	DNA (cytosine-5-)-methyltransferase [EC:2.1.1.37] [RN:R04858]	contig008005-cat_1_3	contig008005-cat_1	2	MF	Methionine degradation	Organic Nitrogen	Amino Acid
contig008015	vOTU003476	contig008015_3	K00558	DNA (cytosine-5-)-methyltransferase [EC:2.1.1.37] [RN:R04858]	contig008015-cat_1_3	contig008015-cat_1	2	MF	Methionine degradation	Organic Nitrogen	Amino Acid
contig008095	vOTU003496	contig008095_16	K00560	thymidylate synthase [EC:2.1.1.45] [RN:R02101]	contig008095-cat_1_16	contig008095-cat_1	2	M	Pyrimidine deoxyribonuleotide biosynthesis, CDP/CTP => dCDP/dCTP,dTDP/dTTP	MISC	Information systems
contig008095	vOTU003496	contig008095_19	K01520	dUTP pyrophosphatase [EC:3.6.1.23] [RN:R02100]	contig008095-cat_1_19	contig008095-cat_1	2	M	Pyrimidine deoxyribonuleotide biosynthesis, CDP/CTP => dCDP/dCTP,dTDP/dTTP	MISC	Information systems
contig008102	vOTU003498	contig008102_24	K00558	DNA (cytosine-5-)-methyltransferase [EC:2.1.1.37] [RN:R04858]	contig008102-cat_1_24	contig008102-cat_1	2	M	Methionine degradation	Organic Nitrogen	Amino Acid
contig008112	vOTU114224	contig008112_41	K00560	thymidylate synthase [EC:2.1.1.45] [RN:R02101]	contig008112-cat_1_41	contig008112-cat_1	1	M	Pyrimidine deoxyribonuleotide biosynthesis, CDP/CTP => dCDP/dCTP,dTDP/dTTP	MISC	Information systems
contig008313	vOTU003537	contig008313_192	K01520	dUTP pyrophosphatase [EC:3.6.1.23] [RN:R02100]	contig008313-cat_1_192	contig008313-cat_1	2	M	Pyrimidine deoxyribonuleotide biosynthesis, CDP/CTP => dCDP/dCTP,dTDP/dTTP	MISC	Information systems
contig008313	vOTU003537	contig008313_195	K00525	ribonucleoside-diphosphate reductase [EC:1.17.4.1] [RN:R02024]	contig008313-cat_1_195	contig008313-cat_1	2	MKE	Pyrimidine deoxyribonuleotide biosynthesis, CDP/CTP => dCDP/dCTP,dTDP/dTTP	MISC	Information systems
contig008356	vOTU003620	contig008356_13	K00558	DNA (cytosine-5-)-methyltransferase [EC:2.1.1.37] [RN:R04858]	contig008356-cat_1_13	contig008356-cat_1	2	M	Methionine degradation	Organic Nitrogen	Amino Acid
contig008483	vOTU003592	contig008483_3	K00558	DNA (cytosine-5-)-methyltransferase [EC:2.1.1.37] [RN:R04858]	contig008483-cat_1_3	contig008483-cat_1	2	MF	Methionine degradation	Organic Nitrogen	Amino Acid
contig008810	vOTU003655	contig008810_61	K01520	dUTP pyrophosphatase [EC:3.6.1.23] [RN:R02100]	contig008810-cat_1_61	contig008810-cat_1	2	MF	Pyrimidine deoxyribonuleotide biosynthesis, CDP/CTP => dCDP/dCTP,dTDP/dTTP	MISC	Information systems
contig008818	vOTU003657	contig008818_5	K01520	dUTP pyrophosphatase [EC:3.6.1.23] [RN:R02100]	contig008818-cat_1_5	contig008818-cat_1	2	MF	Pyrimidine deoxyribonuleotide biosynthesis, CDP/CTP => dCDP/dCTP,dTDP/dTTP	MISC	Information systems
contig008861	vOTU003888	contig008861_13	GT2	GT2 cellulose synthase (EC 2.4.1.12); chitin synthase (EC 2.4.1.16); dolichyl-phosphate beta-D-mannosyltransferase (EC 2.4.1.83); dolichyl-phosphate beta-glucosyltransferase (EC 2.4.1.117); N-acetylglucosaminyltransferase (EC 2.4.1.-); N-acetylgalactosaminyltransferase (EC 2.4.1.-); hyaluronan synthase (EC 2.4.1.212); chitin oligosaccharide synthase (EC 2.4.1.-); beta-1,3-glucan synthase (EC 2.4.…	contig008861-cat_1_13	contig008861-cat_1	1	M	GlycosylTransferases	carbon utilization	CAZY
contig008877	vOTU003684	contig008877_66	K21636	ribonucleoside-triphosphate reductase [EC:1.17.4.2 1.1.98.6] [RN:R02022 R11636]	contig008877-cat_1_66	contig008877-cat_1	1	M	Pyrimidine deoxyribonuleotide biosynthesis, CDP/CTP => dCDP/dCTP,dTDP/dTTP	MISC	Information systems
contig008877	vOTU003684	contig008877_69	K01520	dUTP pyrophosphatase [EC:3.6.1.23] [RN:R02100]	contig008877-cat_1_69	contig008877-cat_1	1	M	Pyrimidine deoxyribonuleotide biosynthesis, CDP/CTP => dCDP/dCTP,dTDP/dTTP	MISC	Information systems
contig008885	vOTU003687	contig008885_23	K01520	dUTP pyrophosphatase [EC:3.6.1.23] [RN:R02100]	contig008885-cat_1_23	contig008885-cat_1	2	M	Pyrimidine deoxyribonuleotide biosynthesis, CDP/CTP => dCDP/dCTP,dTDP/dTTP	MISC	Information systems
contig008955	vOTU003729	contig008955_16	K01520	dUTP pyrophosphatase [EC:3.6.1.23] [RN:R02100]	contig008955-cat_1_16	contig008955-cat_1	2	M	Pyrimidine deoxyribonuleotide biosynthesis, CDP/CTP => dCDP/dCTP,dTDP/dTTP	MISC	Information systems
contig008955	vOTU003729	contig008955_18	K00525	ribonucleoside-diphosphate reductase [EC:1.17.4.1] [RN:R02024]	contig008955-cat_1_18	contig008955-cat_1	2	MKE	Pyrimidine deoxyribonuleotide biosynthesis, CDP/CTP => dCDP/dCTP,dTDP/dTTP	MISC	Information systems
contig008991	vOTU003742	contig008991_24	K00558	DNA (cytosine-5-)-methyltransferase [EC:2.1.1.37] [RN:R04858]	contig008991-cat_1_24	contig008991-cat_1	2	MF	Methionine degradation	Organic Nitrogen	Amino Acid
contig009039	vOTU003767	contig009039_98	K01520	dUTP pyrophosphatase [EC:3.6.1.23] [RN:R02100]	contig009039-cat_1_98	contig009039-cat_1	1	M	Pyrimidine deoxyribonuleotide biosynthesis, CDP/CTP => dCDP/dCTP,dTDP/dTTP	MISC	Information systems
contig009039	vOTU003767	contig009039_101	K21636	ribonucleoside-triphosphate reductase [EC:1.17.4.2 1.1.98.6] [RN:R02022 R11636]	contig009039-cat_1_101	contig009039-cat_1	1	M	Pyrimidine deoxyribonuleotide biosynthesis, CDP/CTP => dCDP/dCTP,dTDP/dTTP	MISC	Information systems
contig009039	vOTU003767	contig009039_139	K01939	adenylosuccinate synthase [EC:6.3.4.4] [RN:R01135]	contig009039-cat_1_139	contig009039-cat_1	2	M	Adenine ribonucleotide biosynthesis, IMP => ADP,ATP	MISC	Information systems
contig009061	vOTU003782	contig009061_5	K21636	ribonucleoside-triphosphate reductase [EC:1.17.4.2 1.1.98.6] [RN:R02022 R11636]	contig009061-cat_1_5	contig009061-cat_1	2	MF	Pyrimidine deoxyribonuleotide biosynthesis, CDP/CTP => dCDP/dCTP,dTDP/dTTP	MISC	Information systems
contig009061	vOTU003782	contig009061_10	K00558	DNA (cytosine-5-)-methyltransferase [EC:2.1.1.37] [RN:R04858]	contig009061-cat_1_10	contig009061-cat_1	2	M	Methionine degradation	Organic Nitrogen	Amino Acid
contig009116	vOTU003808	contig009116_7	K01520	dUTP pyrophosphatase [EC:3.6.1.23] [RN:R02100]	contig009116-cat_1_7	contig009116-cat_1	1	M	Pyrimidine deoxyribonuleotide biosynthesis, CDP/CTP => dCDP/dCTP,dTDP/dTTP	MISC	Information systems
contig009137	vOTU003824	contig009137_99	GT2	GT2 cellulose synthase (EC 2.4.1.12); chitin synthase (EC 2.4.1.16); dolichyl-phosphate beta-D-mannosyltransferase (EC 2.4.1.83); dolichyl-phosphate beta-glucosyltransferase (EC 2.4.1.117); N-acetylglucosaminyltransferase (EC 2.4.1.-); N-acetylgalactosaminyltransferase (EC 2.4.1.-); hyaluronan synthase (EC 2.4.1.212); chitin oligosaccharide synthase (EC 2.4.1.-); beta-1,3-glucan synthase (EC 2.4.…	contig009137-cat_1_99	contig009137-cat_1	1	M	GlycosylTransferases	carbon utilization	CAZY
contig009226	vOTU003870	contig009226_20	K00558	DNA (cytosine-5-)-methyltransferase [EC:2.1.1.37] [RN:R04858]	contig009226-cat_1_20	contig009226-cat_1	2	M	Methionine degradation	Organic Nitrogen	Amino Acid
contig009280	vOTU003898	contig009280_28	K01520	dUTP pyrophosphatase [EC:3.6.1.23] [RN:R02100]	contig009280-cat_1_28	contig009280-cat_1	1	M	Pyrimidine deoxyribonuleotide biosynthesis, CDP/CTP => dCDP/dCTP,dTDP/dTTP	MISC	Information systems
contig009441	vOTU003981	contig009441_70	K01520	dUTP pyrophosphatase [EC:3.6.1.23] [RN:R02100]	contig009441-cat_1_70	contig009441-cat_1	2	M	Pyrimidine deoxyribonuleotide biosynthesis, CDP/CTP => dCDP/dCTP,dTDP/dTTP	MISC	Information systems
contig009442	vOTU003982	contig009442_42	K01520	dUTP pyrophosphatase [EC:3.6.1.23] [RN:R02100]	contig009442-cat_1_42	contig009442-cat_1	2	M	Pyrimidine deoxyribonuleotide biosynthesis, CDP/CTP => dCDP/dCTP,dTDP/dTTP	MISC	Information systems
contig009442	vOTU003982	contig009442_46	K21636	ribonucleoside-triphosphate reductase [EC:1.17.4.2 1.1.98.6] [RN:R02022 R11636]	contig009442-cat_1_46	contig009442-cat_1	2	M	Pyrimidine deoxyribonuleotide biosynthesis, CDP/CTP => dCDP/dCTP,dTDP/dTTP	MISC	Information systems
contig009462	vOTU003996	contig009462_28	K00558	DNA (cytosine-5-)-methyltransferase [EC:2.1.1.37] [RN:R04858]	contig009462-cat_2_28	contig009462-cat_2	3	M	Methionine degradation	Organic Nitrogen	Amino Acid
contig009494	vOTU004013	contig009494_5	K01520	dUTP pyrophosphatase [EC:3.6.1.23] [RN:R02100]	contig009494-cat_1_5	contig009494-cat_1	2	MF	Pyrimidine deoxyribonuleotide biosynthesis, CDP/CTP => dCDP/dCTP,dTDP/dTTP	MISC	Information systems
contig009513	vOTU004026	contig009513_34	K01520	dUTP pyrophosphatase [EC:3.6.1.23] [RN:R02100]	contig009513-cat_1_34	contig009513-cat_1	2	MF	Pyrimidine deoxyribonuleotide biosynthesis, CDP/CTP => dCDP/dCTP,dTDP/dTTP	MISC	Information systems
contig009617	vOTU004085	contig009617_9	K00558	DNA (cytosine-5-)-methyltransferase [EC:2.1.1.37] [RN:R04858]	contig009617-cat_1_9	contig009617-cat_1	2	MF	Methionine degradation	Organic Nitrogen	Amino Acid
contig009709	vOTU004144	contig009709_8	K01520	dUTP pyrophosphatase [EC:3.6.1.23] [RN:R02100]	contig009709-cat_1_8	contig009709-cat_1	2	M	Pyrimidine deoxyribonuleotide biosynthesis, CDP/CTP => dCDP/dCTP,dTDP/dTTP	MISC	Information systems
contig009727	vOTU004154	contig009727_6	K00558	DNA (cytosine-5-)-methyltransferase [EC:2.1.1.37] [RN:R04858]	contig009727-cat_1_6	contig009727-cat_1	2	MF	Methionine degradation	Organic Nitrogen	Amino Acid
contig009731	vOTU004157	contig009731_12	K00558	DNA (cytosine-5-)-methyltransferase [EC:2.1.1.37] [RN:R04858]	contig009731-cat_1_12	contig009731-cat_1	2	MF	Methionine degradation	Organic Nitrogen	Amino Acid
contig009755	vOTU004175	contig009755_28	K00525	ribonucleoside-diphosphate reductase [EC:1.17.4.1] [RN:R02024]	contig009755-cat_1_28	contig009755-cat_1	1	MKE	Pyrimidine deoxyribonuleotide biosynthesis, CDP/CTP => dCDP/dCTP,dTDP/dTTP	MISC	Information systems
contig009771	vOTU004182	contig009771_10	K01520	dUTP pyrophosphatase [EC:3.6.1.23] [RN:R02100]	contig009771-cat_1_10	contig009771-cat_1	2	M	Pyrimidine deoxyribonuleotide biosynthesis, CDP/CTP => dCDP/dCTP,dTDP/dTTP	MISC	Information systems
contig009771	vOTU004182	contig009771_12	K00558	DNA (cytosine-5-)-methyltransferase [EC:2.1.1.37] [RN:R04858]	contig009771-cat_1_12	contig009771-cat_1	2	M	Methionine degradation	Organic Nitrogen	Amino Acid
contig009788	vOTU004193	contig009788_11	K00558	DNA (cytosine-5-)-methyltransferase [EC:2.1.1.37] [RN:R04858]	contig009788-cat_1_11	contig009788-cat_1	2	M	Methionine degradation	Organic Nitrogen	Amino Acid
contig009802	vOTU004204	contig009802_45	K00558	DNA (cytosine-5-)-methyltransferase [EC:2.1.1.37] [RN:R04858]	contig009802-cat_1_45	contig009802-cat_1	2	M	Methionine degradation	Organic Nitrogen	Amino Acid
contig009840	vOTU004221	contig009840_22	K01494	dCTP deaminase [EC:3.5.4.13] [RN:R02325]	contig009840-cat_1_22	contig009840-cat_1	1	M	Pyrimidine deoxyribonuleotide biosynthesis, CDP/CTP => dCDP/dCTP,dTDP/dTTP	MISC	Information systems
contig009840	vOTU004221	contig009840_42	K00560	thymidylate synthase [EC:2.1.1.45] [RN:R02101]	contig009840-cat_1_42	contig009840-cat_1	2	M	Pyrimidine deoxyribonuleotide biosynthesis, CDP/CTP => dCDP/dCTP,dTDP/dTTP	MISC	Information systems
contig009891	vOTU004255	contig009891_10	K00558	DNA (cytosine-5-)-methyltransferase [EC:2.1.1.37] [RN:R04858]	contig009891-cat_1_10	contig009891-cat_1	2	MF	Methionine degradation	Organic Nitrogen	Amino Acid
contig009894	vOTU004256	contig009894_30	K00558	DNA (cytosine-5-)-methyltransferase [EC:2.1.1.37] [RN:R04858]	contig009894-cat_1_30	contig009894-cat_1	1	M	Methionine degradation	Organic Nitrogen	Amino Acid
contig009915	vOTU004271	contig009915_21	K01520	dUTP pyrophosphatase [EC:3.6.1.23] [RN:R02100]	contig009915-cat_2_21	contig009915-cat_2	3	M	Pyrimidine deoxyribonuleotide biosynthesis, CDP/CTP => dCDP/dCTP,dTDP/dTTP	MISC	Information systems
contig009919	vOTU004274	contig009919_21	K00558	DNA (cytosine-5-)-methyltransferase [EC:2.1.1.37] [RN:R04858]	contig009919-cat_1_21	contig009919-cat_1	1	M	Methionine degradation	Organic Nitrogen	Amino Acid
contig009930	vOTU004283	contig009930_35	K00558	DNA (cytosine-5-)-methyltransferase [EC:2.1.1.37] [RN:R04858]	contig009930-cat_1_35	contig009930-cat_1	2	M	Methionine degradation	Organic Nitrogen	Amino Acid
contig009967	vOTU004306	contig009967_16	K01520	dUTP pyrophosphatase [EC:3.6.1.23] [RN:R02100]	contig009967-cat_1_16	contig009967-cat_1	1	M	Pyrimidine deoxyribonuleotide biosynthesis, CDP/CTP => dCDP/dCTP,dTDP/dTTP	MISC	Information systems
contig010079	vOTU004374	contig010079_2	K21636	ribonucleoside-triphosphate reductase [EC:1.17.4.2 1.1.98.6] [RN:R02022 R11636]	contig010079-cat_1_2	contig010079-cat_1	2	MF	Pyrimidine deoxyribonuleotide biosynthesis, CDP/CTP => dCDP/dCTP,dTDP/dTTP	MISC	Information systems
contig010114	vOTU063232	contig010114_20	K00789	S-adenosylmethionine synthetase [EC:2.5.1.6] [RN:R00177]	contig010114-cat_1_20	contig010114-cat_1	1	M	Cysteine biosynthesis, methionine => cysteine	Organic Nitrogen	Amino Acid
contig010114	vOTU063232	contig010114_20	K00789	S-adenosylmethionine synthetase [EC:2.5.1.6] [RN:R00177]	contig010114-cat_1_20	contig010114-cat_1	1	M	Methionine degradation	Organic Nitrogen	Amino Acid
contig010151	vOTU004410	contig010151_16	K01520	dUTP pyrophosphatase [EC:3.6.1.23] [RN:R02100]	contig010151-cat_1_16	contig010151-cat_1	2	M	Pyrimidine deoxyribonuleotide biosynthesis, CDP/CTP => dCDP/dCTP,dTDP/dTTP	MISC	Information systems
contig010151	vOTU004410	contig010151_19	K21636	ribonucleoside-triphosphate reductase [EC:1.17.4.2 1.1.98.6] [RN:R02022 R11636]	contig010151-cat_1_19	contig010151-cat_1	2	M	Pyrimidine deoxyribonuleotide biosynthesis, CDP/CTP => dCDP/dCTP,dTDP/dTTP	MISC	Information systems
contig010187	vOTU004428	contig010187_3	K00558	DNA (cytosine-5-)-methyltransferase [EC:2.1.1.37] [RN:R04858]	contig010187-cat_1_3	contig010187-cat_1	2	MF	Methionine degradation	Organic Nitrogen	Amino Acid
contig010250	vOTU004459	contig010250_34	K00558	DNA (cytosine-5-)-methyltransferase [EC:2.1.1.37] [RN:R04858]	contig010250-cat_2_34	contig010250-cat_2	3	M	Methionine degradation	Organic Nitrogen	Amino Acid
contig010291	vOTU004483	contig010291_4	K01520	dUTP pyrophosphatase [EC:3.6.1.23] [RN:R02100]	contig010291-cat_1_4	contig010291-cat_1	2	MF	Pyrimidine deoxyribonuleotide biosynthesis, CDP/CTP => dCDP/dCTP,dTDP/dTTP	MISC	Information systems
contig010323	vOTU004502	contig010323_15	K01520	dUTP pyrophosphatase [EC:3.6.1.23] [RN:R02100]	contig010323-cat_1_15	contig010323-cat_1	2	M	Pyrimidine deoxyribonuleotide biosynthesis, CDP/CTP => dCDP/dCTP,dTDP/dTTP	MISC	Information systems
contig010381	vOTU004536	contig010381_14	K00558	DNA (cytosine-5-)-methyltransferase [EC:2.1.1.37] [RN:R04858]	contig010381-cat_1_14	contig010381-cat_1	2	MF	Methionine degradation	Organic Nitrogen	Amino Acid
contig010401	vOTU004550	contig010401_8	K00558	DNA (cytosine-5-)-methyltransferase [EC:2.1.1.37] [RN:R04858]	contig010401-cat_1_8	contig010401-cat_1	1	M	Methionine degradation	Organic Nitrogen	Amino Acid
contig010408	vOTU004554	contig010408_90	K21636	ribonucleoside-triphosphate reductase [EC:1.17.4.2 1.1.98.6] [RN:R02022 R11636]	contig010408-cat_2_90	contig010408-cat_2	3	M	Pyrimidine deoxyribonuleotide biosynthesis, CDP/CTP => dCDP/dCTP,dTDP/dTTP	MISC	Information systems
contig010408	vOTU004554	contig010408_98	K01520	dUTP pyrophosphatase [EC:3.6.1.23] [RN:R02100]	contig010408-cat_2_98	contig010408-cat_2	3	MF	Pyrimidine deoxyribonuleotide biosynthesis, CDP/CTP => dCDP/dCTP,dTDP/dTTP	MISC	Information systems
contig010413	vOTU004557	contig010413_13	K00558	DNA (cytosine-5-)-methyltransferase [EC:2.1.1.37] [RN:R04858]	contig010413-cat_1_13	contig010413-cat_1	2	MF	Methionine degradation	Organic Nitrogen	Amino Acid
contig010463	vOTU004589	contig010463_25	K00558	DNA (cytosine-5-)-methyltransferase [EC:2.1.1.37] [RN:R04858]	contig010463-cat_2_25	contig010463-cat_2	3	MF	Methionine degradation	Organic Nitrogen	Amino Acid
contig010496	vOTU004613	contig010496_42	K00558	DNA (cytosine-5-)-methyltransferase [EC:2.1.1.37] [RN:R04858]	contig010496-cat_2_42	contig010496-cat_2	3	M	Methionine degradation	Organic Nitrogen	Amino Acid
contig010603	vOTU004662	contig010603_10	K21636	ribonucleoside-triphosphate reductase [EC:1.17.4.2 1.1.98.6] [RN:R02022 R11636]	contig010603-cat_1_10	contig010603-cat_1	2	MF	Pyrimidine deoxyribonuleotide biosynthesis, CDP/CTP => dCDP/dCTP,dTDP/dTTP	MISC	Information systems
contig010603	vOTU004662	contig010603_12	K21636	ribonucleoside-triphosphate reductase [EC:1.17.4.2 1.1.98.6] [RN:R02022 R11636]	contig010603-cat_1_12	contig010603-cat_1	2	MF	Pyrimidine deoxyribonuleotide biosynthesis, CDP/CTP => dCDP/dCTP,dTDP/dTTP	MISC	Information systems
contig010690	vOTU004703	contig010690_72	K21636	ribonucleoside-triphosphate reductase [EC:1.17.4.2 1.1.98.6] [RN:R02022 R11636]	contig010690-cat_2_72	contig010690-cat_2	3	M	Pyrimidine deoxyribonuleotide biosynthesis, CDP/CTP => dCDP/dCTP,dTDP/dTTP	MISC	Information systems
contig010690	vOTU004703	contig010690_79	K01520	dUTP pyrophosphatase [EC:3.6.1.23] [RN:R02100]	contig010690-cat_2_79	contig010690-cat_2	3	M	Pyrimidine deoxyribonuleotide biosynthesis, CDP/CTP => dCDP/dCTP,dTDP/dTTP	MISC	Information systems
contig010697	vOTU004705	contig010697_11	K01520	dUTP pyrophosphatase [EC:3.6.1.23] [RN:R02100]	contig010697-cat_1_11	contig010697-cat_1	1	MF	Pyrimidine deoxyribonuleotide biosynthesis, CDP/CTP => dCDP/dCTP,dTDP/dTTP	MISC	Information systems
contig010853	vOTU004791	contig010853_27	K00558	DNA (cytosine-5-)-methyltransferase [EC:2.1.1.37] [RN:R04858]	contig010853-cat_1_27	contig010853-cat_1	2	M	Methionine degradation	Organic Nitrogen	Amino Acid
contig010864	vOTU004796	contig010864_7	K01520	dUTP pyrophosphatase [EC:3.6.1.23] [RN:R02100]	contig010864-cat_1_7	contig010864-cat_1	2	MF	Pyrimidine deoxyribonuleotide biosynthesis, CDP/CTP => dCDP/dCTP,dTDP/dTTP	MISC	Information systems
contig010910	vOTU004823	contig010910_6	K00558	DNA (cytosine-5-)-methyltransferase [EC:2.1.1.37] [RN:R04858]	contig010910-cat_2_6	contig010910-cat_2	3	MF	Methionine degradation	Organic Nitrogen	Amino Acid
contig010987	vOTU004863	contig010987_22	K01520	dUTP pyrophosphatase [EC:3.6.1.23] [RN:R02100]	contig010987-cat_1_22	contig010987-cat_1	2	M	Pyrimidine deoxyribonuleotide biosynthesis, CDP/CTP => dCDP/dCTP,dTDP/dTTP	MISC	Information systems
contig010993	vOTU004866	contig010993_35	K01520	dUTP pyrophosphatase [EC:3.6.1.23] [RN:R02100]	contig010993-cat_1_35	contig010993-cat_1	2	M	Pyrimidine deoxyribonuleotide biosynthesis, CDP/CTP => dCDP/dCTP,dTDP/dTTP	MISC	Information systems
contig010993	vOTU004866	contig010993_36	K00560	thymidylate synthase [EC:2.1.1.45] [RN:R02101]	contig010993-cat_1_36	contig010993-cat_1	2	M	Pyrimidine deoxyribonuleotide biosynthesis, CDP/CTP => dCDP/dCTP,dTDP/dTTP	MISC	Information systems
contig011016	vOTU004881	contig011016_12	K01520	dUTP pyrophosphatase [EC:3.6.1.23] [RN:R02100]	contig011016-cat_1_12	contig011016-cat_1	2	MF	Pyrimidine deoxyribonuleotide biosynthesis, CDP/CTP => dCDP/dCTP,dTDP/dTTP	MISC	Information systems
contig011029	vOTU004890	contig011029_27	K00558	DNA (cytosine-5-)-methyltransferase [EC:2.1.1.37] [RN:R04858]	contig011029-cat_1_27	contig011029-cat_1	2	MF	Methionine degradation	Organic Nitrogen	Amino Acid
contig011064	vOTU004915	contig011064_17	K01520	dUTP pyrophosphatase [EC:3.6.1.23] [RN:R02100]	contig011064-cat_1_17	contig011064-cat_1	2	M	Pyrimidine deoxyribonuleotide biosynthesis, CDP/CTP => dCDP/dCTP,dTDP/dTTP	MISC	Information systems
contig011064	vOTU004915	contig011064_23	K21636	ribonucleoside-triphosphate reductase [EC:1.17.4.2 1.1.98.6] [RN:R02022 R11636]	contig011064-cat_1_23	contig011064-cat_1	2	M	Pyrimidine deoxyribonuleotide biosynthesis, CDP/CTP => dCDP/dCTP,dTDP/dTTP	MISC	Information systems
contig011065	vOTU004916	contig011065_15	K01520	dUTP pyrophosphatase [EC:3.6.1.23] [RN:R02100]	contig011065-cat_1_15	contig011065-cat_1	2	M	Pyrimidine deoxyribonuleotide biosynthesis, CDP/CTP => dCDP/dCTP,dTDP/dTTP	MISC	Information systems
contig011065	vOTU004916	contig011065_27	K00558	DNA (cytosine-5-)-methyltransferase [EC:2.1.1.37] [RN:R04858]	contig011065-cat_1_27	contig011065-cat_1	2	M	Methionine degradation	Organic Nitrogen	Amino Acid
contig011111	vOTU004936	contig011111_11	M26	Catlytic type: Metallo; cleaves the heavy chain of human IgA1 at the Pro227-Thr228 bond; tightly associated with the bacterial cell surface	contig011111-cat_1_11	contig011111-cat_1	2	MF	Endopeptidases	Organic Nitrogen	Peptidase
contig011174	vOTU004963	contig011174_3	K00558	DNA (cytosine-5-)-methyltransferase [EC:2.1.1.37] [RN:R04858]	contig011174-cat_1_3	contig011174-cat_1	2	MF	Methionine degradation	Organic Nitrogen	Amino Acid
contig011224	vOTU004984	contig011224_19	K21636	ribonucleoside-triphosphate reductase [EC:1.17.4.2 1.1.98.6] [RN:R02022 R11636]	contig011224-cat_1_19	contig011224-cat_1	2	M	Pyrimidine deoxyribonuleotide biosynthesis, CDP/CTP => dCDP/dCTP,dTDP/dTTP	MISC	Information systems
contig011224	vOTU004984	contig011224_20	K21636	ribonucleoside-triphosphate reductase [EC:1.17.4.2 1.1.98.6] [RN:R02022 R11636]	contig011224-cat_1_20	contig011224-cat_1	2	M	Pyrimidine deoxyribonuleotide biosynthesis, CDP/CTP => dCDP/dCTP,dTDP/dTTP	MISC	Information systems
contig011359	vOTU005045	contig011359_81	K00558	DNA (cytosine-5-)-methyltransferase [EC:2.1.1.37] [RN:R04858]	contig011359-cat_1_81	contig011359-cat_1	2	MF	Methionine degradation	Organic Nitrogen	Amino Acid
contig011430	vOTU005081	contig011430_15	K00525	ribonucleoside-diphosphate reductase [EC:1.17.4.1] [RN:R02024]	contig011430-cat_1_15	contig011430-cat_1	2	MKEF	Pyrimidine deoxyribonuleotide biosynthesis, CDP/CTP => dCDP/dCTP,dTDP/dTTP	MISC	Information systems
contig011447	vOTU005094	contig011447_11	K21636	ribonucleoside-triphosphate reductase [EC:1.17.4.2 1.1.98.6] [RN:R02022 R11636]	contig011447-cat_1_11	contig011447-cat_1	2	MF	Pyrimidine deoxyribonuleotide biosynthesis, CDP/CTP => dCDP/dCTP,dTDP/dTTP	MISC	Information systems
contig011529	vOTU005141	contig011529_70	K00558	DNA (cytosine-5-)-methyltransferase [EC:2.1.1.37] [RN:R04858]	contig011529-cat_1_70	contig011529-cat_1	2	M	Methionine degradation	Organic Nitrogen	Amino Acid
contig011622	vOTU005208	contig011622_42	K01520	dUTP pyrophosphatase [EC:3.6.1.23] [RN:R02100]	contig011622-cat_1_42	contig011622-cat_1	2	M	Pyrimidine deoxyribonuleotide biosynthesis, CDP/CTP => dCDP/dCTP,dTDP/dTTP	MISC	Information systems
contig011622	vOTU005208	contig011622_43	K00525	ribonucleoside-diphosphate reductase [EC:1.17.4.1] [RN:R02024]	contig011622-cat_1_43	contig011622-cat_1	2	MKE	Pyrimidine deoxyribonuleotide biosynthesis, CDP/CTP => dCDP/dCTP,dTDP/dTTP	MISC	Information systems
contig011629	vOTU005214	contig011629_14	K00558	DNA (cytosine-5-)-methyltransferase [EC:2.1.1.37] [RN:R04858]	contig011629-cat_1_14	contig011629-cat_1	2	M	Methionine degradation	Organic Nitrogen	Amino Acid
contig011678	vOTU005249	contig011678_16	K00558	DNA (cytosine-5-)-methyltransferase [EC:2.1.1.37] [RN:R04858]	contig011678-cat_1_16	contig011678-cat_1	2	MF	Methionine degradation	Organic Nitrogen	Amino Acid
contig011682	vOTU005253	contig011682_13	K01520	dUTP pyrophosphatase [EC:3.6.1.23] [RN:R02100]	contig011682-cat_1_13	contig011682-cat_1	2	M	Pyrimidine deoxyribonuleotide biosynthesis, CDP/CTP => dCDP/dCTP,dTDP/dTTP	MISC	Information systems
contig011682	vOTU005253	contig011682_16	K21636	ribonucleoside-triphosphate reductase [EC:1.17.4.2 1.1.98.6] [RN:R02022 R11636]	contig011682-cat_1_16	contig011682-cat_1	2	M	Pyrimidine deoxyribonuleotide biosynthesis, CDP/CTP => dCDP/dCTP,dTDP/dTTP	MISC	Information systems
contig011695	vOTU005260	contig011695_10	K01520	dUTP pyrophosphatase [EC:3.6.1.23] [RN:R02100]	contig011695-cat_1_10	contig011695-cat_1	2	MF	Pyrimidine deoxyribonuleotide biosynthesis, CDP/CTP => dCDP/dCTP,dTDP/dTTP	MISC	Information systems
contig011695	vOTU005260	contig011695_21	K00558	DNA (cytosine-5-)-methyltransferase [EC:2.1.1.37] [RN:R04858]	contig011695-cat_1_21	contig011695-cat_1	2	M	Methionine degradation	Organic Nitrogen	Amino Acid
contig011707	vOTU005269	contig011707_13	K01520	dUTP pyrophosphatase [EC:3.6.1.23] [RN:R02100]	contig011707-cat_1_13	contig011707-cat_1	1	M	Pyrimidine deoxyribonuleotide biosynthesis, CDP/CTP => dCDP/dCTP,dTDP/dTTP	MISC	Information systems
contig011707	vOTU005269	contig011707_14	K01491	methylenetetrahydrofolate dehydrogenase (NADP+) / methenyltetrahydrofolate cyclohydrolase [EC:1.5.1.5 3.5.4.9] [RN:R01655 R01220]	contig011707-cat_1_14	contig011707-cat_1	1	M	Reductive acetyl-CoA pathway (Wood-Ljungdahl pathway)	Energy	C1
contig011707	vOTU005269	contig011707_19	K21636	ribonucleoside-triphosphate reductase [EC:1.17.4.2 1.1.98.6] [RN:R02022 R11636]	contig011707-cat_1_19	contig011707-cat_1	1	M	Pyrimidine deoxyribonuleotide biosynthesis, CDP/CTP => dCDP/dCTP,dTDP/dTTP	MISC	Information systems
contig011707	vOTU005269	contig011707_26	K00558	DNA (cytosine-5-)-methyltransferase [EC:2.1.1.37] [RN:R04858]	contig011707-cat_1_26	contig011707-cat_1	2	M	Methionine degradation	Organic Nitrogen	Amino Acid
contig011713	vOTU005273	contig011713_20	K01494	dCTP deaminase [EC:3.5.4.13] [RN:R02325]	contig011713-cat_2_20	contig011713-cat_2	3	MF	Pyrimidine deoxyribonuleotide biosynthesis, CDP/CTP => dCDP/dCTP,dTDP/dTTP	MISC	Information systems
contig011868	vOTU005363	contig011868_3	K01520	dUTP pyrophosphatase [EC:3.6.1.23] [RN:R02100]	contig011868-cat_1_3	contig011868-cat_1	2	MF	Pyrimidine deoxyribonuleotide biosynthesis, CDP/CTP => dCDP/dCTP,dTDP/dTTP	MISC	Information systems
contig011912	vOTU005389	contig011912_2	K21636	ribonucleoside-triphosphate reductase [EC:1.17.4.2 1.1.98.6] [RN:R02022 R11636]	contig011912-cat_1_2	contig011912-cat_1	2	MF	Pyrimidine deoxyribonuleotide biosynthesis, CDP/CTP => dCDP/dCTP,dTDP/dTTP	MISC	Information systems
contig011912	vOTU005389	contig011912_6	K01520	dUTP pyrophosphatase [EC:3.6.1.23] [RN:R02100]	contig011912-cat_1_6	contig011912-cat_1	2	MF	Pyrimidine deoxyribonuleotide biosynthesis, CDP/CTP => dCDP/dCTP,dTDP/dTTP	MISC	Information systems
contig011948	vOTU005410	contig011948_20	K00558	DNA (cytosine-5-)-methyltransferase [EC:2.1.1.37] [RN:R04858]	contig011948-cat_1_20	contig011948-cat_1	1	M	Methionine degradation	Organic Nitrogen	Amino Acid
contig011989	vOTU007770	contig011989_26	K00789	S-adenosylmethionine synthetase [EC:2.5.1.6] [RN:R00177]	contig011989-cat_1_26	contig011989-cat_1	2	M	Cysteine biosynthesis, methionine => cysteine	Organic Nitrogen	Amino Acid
contig011989	vOTU007770	contig011989_26	K00789	S-adenosylmethionine synthetase [EC:2.5.1.6] [RN:R00177]	contig011989-cat_1_26	contig011989-cat_1	2	M	Methionine degradation	Organic Nitrogen	Amino Acid
contig011989	vOTU007770	contig011989_30	K00558	DNA (cytosine-5-)-methyltransferase [EC:2.1.1.37] [RN:R04858]	contig011989-cat_1_30	contig011989-cat_1	2	M	Methionine degradation	Organic Nitrogen	Amino Acid
contig012007	vOTU005437	contig012007_23	K00558	DNA (cytosine-5-)-methyltransferase [EC:2.1.1.37] [RN:R04858]	contig012007-cat_2_23	contig012007-cat_2	3	M	Methionine degradation	Organic Nitrogen	Amino Acid
contig012020	vOTU005444	contig012020_30	K01520	dUTP pyrophosphatase [EC:3.6.1.23] [RN:R02100]	contig012020-cat_1_30	contig012020-cat_1	2	MF	Pyrimidine deoxyribonuleotide biosynthesis, CDP/CTP => dCDP/dCTP,dTDP/dTTP	MISC	Information systems
contig012173	vOTU026267	contig012173_6	K00558	DNA (cytosine-5-)-methyltransferase [EC:2.1.1.37] [RN:R04858]	contig012173-cat_1_6	contig012173-cat_1	2	MF	Methionine degradation	Organic Nitrogen	Amino Acid
contig012213	vOTU005538	contig012213_10	K01520	dUTP pyrophosphatase [EC:3.6.1.23] [RN:R02100]	contig012213-cat_1_10	contig012213-cat_1	2	MF	Pyrimidine deoxyribonuleotide biosynthesis, CDP/CTP => dCDP/dCTP,dTDP/dTTP	MISC	Information systems
contig012292	vOTU005574	contig012292_60	K00558	DNA (cytosine-5-)-methyltransferase [EC:2.1.1.37] [RN:R04858]	contig012292-cat_1_60	contig012292-cat_1	2	M	Methionine degradation	Organic Nitrogen	Amino Acid
contig012353	vOTU005608	contig012353_37	K01494	dCTP deaminase [EC:3.5.4.13] [RN:R02325]	contig012353-cat_1_37	contig012353-cat_1	1	M	Pyrimidine deoxyribonuleotide biosynthesis, CDP/CTP => dCDP/dCTP,dTDP/dTTP	MISC	Information systems
contig012353	vOTU005608	contig012353_182	K00937	polyphosphate kinase ???	contig012353-cat_1_182	contig012353-cat_1	1	M	Cytochrome d ubiquinol oxidase	Energy	Oxygen
contig012408	vOTU005642	contig012408_17	K01520	dUTP pyrophosphatase [EC:3.6.1.23] [RN:R02100]	contig012408-cat_1_17	contig012408-cat_1	2	M	Pyrimidine deoxyribonuleotide biosynthesis, CDP/CTP => dCDP/dCTP,dTDP/dTTP	MISC	Information systems
contig012408	vOTU005642	contig012408_83	K00558	DNA (cytosine-5-)-methyltransferase [EC:2.1.1.37] [RN:R04858]	contig012408-cat_1_83	contig012408-cat_1	2	M	Methionine degradation	Organic Nitrogen	Amino Acid
contig012454	vOTU005665	contig012454_27	K01520	dUTP pyrophosphatase [EC:3.6.1.23] [RN:R02100]	contig012454-cat_2_27	contig012454-cat_2	3	M	Pyrimidine deoxyribonuleotide biosynthesis, CDP/CTP => dCDP/dCTP,dTDP/dTTP	MISC	Information systems
contig012454	vOTU005665	contig012454_34	K21636	ribonucleoside-triphosphate reductase [EC:1.17.4.2 1.1.98.6] [RN:R02022 R11636]	contig012454-cat_2_34	contig012454-cat_2	3	M	Pyrimidine deoxyribonuleotide biosynthesis, CDP/CTP => dCDP/dCTP,dTDP/dTTP	MISC	Information systems
contig012497	vOTU005686	contig012497_56	K21636	ribonucleoside-triphosphate reductase [EC:1.17.4.2 1.1.98.6] [RN:R02022 R11636]	contig012497-cat_1_56	contig012497-cat_1	1	M	Pyrimidine deoxyribonuleotide biosynthesis, CDP/CTP => dCDP/dCTP,dTDP/dTTP	MISC	Information systems
contig012497	vOTU005686	contig012497_59	K01520	dUTP pyrophosphatase [EC:3.6.1.23] [RN:R02100]	contig012497-cat_1_59	contig012497-cat_1	1	M	Pyrimidine deoxyribonuleotide biosynthesis, CDP/CTP => dCDP/dCTP,dTDP/dTTP	MISC	Information systems
contig012526	vOTU005701	contig012526_14	K01520	dUTP pyrophosphatase [EC:3.6.1.23] [RN:R02100]	contig012526-cat_1_14	contig012526-cat_1	2	M	Pyrimidine deoxyribonuleotide biosynthesis, CDP/CTP => dCDP/dCTP,dTDP/dTTP	MISC	Information systems
contig012551	vOTU005716	contig012551_9	K21636	ribonucleoside-triphosphate reductase [EC:1.17.4.2 1.1.98.6] [RN:R02022 R11636]	contig012551-cat_1_9	contig012551-cat_1	1	M	Pyrimidine deoxyribonuleotide biosynthesis, CDP/CTP => dCDP/dCTP,dTDP/dTTP	MISC	Information systems
contig012551	vOTU005716	contig012551_10	K01494	dCTP deaminase [EC:3.5.4.13] [RN:R02325]	contig012551-cat_1_10	contig012551-cat_1	1	M	Pyrimidine deoxyribonuleotide biosynthesis, CDP/CTP => dCDP/dCTP,dTDP/dTTP	MISC	Information systems
contig012576	vOTU005733	contig012576_5	K21636	ribonucleoside-triphosphate reductase [EC:1.17.4.2 1.1.98.6] [RN:R02022 R11636]	contig012576-cat_1_5	contig012576-cat_1	2	MF	Pyrimidine deoxyribonuleotide biosynthesis, CDP/CTP => dCDP/dCTP,dTDP/dTTP	MISC	Information systems
contig012576	vOTU005733	contig012576_8	K01520	dUTP pyrophosphatase [EC:3.6.1.23] [RN:R02100]	contig012576-cat_1_8	contig012576-cat_1	2	MF	Pyrimidine deoxyribonuleotide biosynthesis, CDP/CTP => dCDP/dCTP,dTDP/dTTP	MISC	Information systems
contig012613	vOTU005745	contig012613_21	K00558	DNA (cytosine-5-)-methyltransferase [EC:2.1.1.37] [RN:R04858]	contig012613-cat_1_21	contig012613-cat_1	2	M	Methionine degradation	Organic Nitrogen	Amino Acid
contig012645	vOTU005761	contig012645_16	K01520	dUTP pyrophosphatase [EC:3.6.1.23] [RN:R02100]	contig012645-cat_2_16	contig012645-cat_2	3	M	Pyrimidine deoxyribonuleotide biosynthesis, CDP/CTP => dCDP/dCTP,dTDP/dTTP	MISC	Information systems
contig012645	vOTU005761	contig012645_20	K21636	ribonucleoside-triphosphate reductase [EC:1.17.4.2 1.1.98.6] [RN:R02022 R11636]	contig012645-cat_2_20	contig012645-cat_2	3	M	Pyrimidine deoxyribonuleotide biosynthesis, CDP/CTP => dCDP/dCTP,dTDP/dTTP	MISC	Information systems
contig012691	vOTU005792	contig012691_7	GT2	GT2 cellulose synthase (EC 2.4.1.12); chitin synthase (EC 2.4.1.16); dolichyl-phosphate beta-D-mannosyltransferase (EC 2.4.1.83); dolichyl-phosphate beta-glucosyltransferase (EC 2.4.1.117); N-acetylglucosaminyltransferase (EC 2.4.1.-); N-acetylgalactosaminyltransferase (EC 2.4.1.-); hyaluronan synthase (EC 2.4.1.212); chitin oligosaccharide synthase (EC 2.4.1.-); beta-1,3-glucan synthase (EC 2.4.…	contig012691-cat_1_7	contig012691-cat_1	1	M	GlycosylTransferases	carbon utilization	CAZY
contig012691	vOTU005792	contig012691_92	K01520	dUTP pyrophosphatase [EC:3.6.1.23] [RN:R02100]	contig012691-cat_1_92	contig012691-cat_1	1	M	Pyrimidine deoxyribonuleotide biosynthesis, CDP/CTP => dCDP/dCTP,dTDP/dTTP	MISC	Information systems
contig012709	vOTU005805	contig012709_20	K00558	DNA (cytosine-5-)-methyltransferase [EC:2.1.1.37] [RN:R04858]	contig012709-cat_1_20	contig012709-cat_1	2	M	Methionine degradation	Organic Nitrogen	Amino Acid
contig012781	vOTU005845	contig012781_18	K00558	DNA (cytosine-5-)-methyltransferase [EC:2.1.1.37] [RN:R04858]	contig012781-cat_1_18	contig012781-cat_1	2	MF	Methionine degradation	Organic Nitrogen	Amino Acid
contig012833	vOTU005880	contig012833_17	K00558	DNA (cytosine-5-)-methyltransferase [EC:2.1.1.37] [RN:R04858]	contig012833-cat_1_17	contig012833-cat_1	2	M	Methionine degradation	Organic Nitrogen	Amino Acid
contig012833	vOTU005880	contig012833_86	K00525	ribonucleoside-diphosphate reductase [EC:1.17.4.1] [RN:R02024]	contig012833-cat_1_86	contig012833-cat_1	1	MKE	Pyrimidine deoxyribonuleotide biosynthesis, CDP/CTP => dCDP/dCTP,dTDP/dTTP	MISC	Information systems
contig012833	vOTU005880	contig012833_89	K01520	dUTP pyrophosphatase [EC:3.6.1.23] [RN:R02100]	contig012833-cat_1_89	contig012833-cat_1	1	M	Pyrimidine deoxyribonuleotide biosynthesis, CDP/CTP => dCDP/dCTP,dTDP/dTTP	MISC	Information systems
contig012894	vOTU005915	contig012894_6	K00789	S-adenosylmethionine synthetase [EC:2.5.1.6] [RN:R00177]	contig012894-cat_1_6	contig012894-cat_1	2	MF	Cysteine biosynthesis, methionine => cysteine	Organic Nitrogen	Amino Acid
contig012894	vOTU005915	contig012894_6	K00789	S-adenosylmethionine synthetase [EC:2.5.1.6] [RN:R00177]	contig012894-cat_1_6	contig012894-cat_1	2	MF	Methionine degradation	Organic Nitrogen	Amino Acid
contig012916	vOTU005932	contig012916_22	K01520	dUTP pyrophosphatase [EC:3.6.1.23] [RN:R02100]	contig012916-cat_1_22	contig012916-cat_1	2	M	Pyrimidine deoxyribonuleotide biosynthesis, CDP/CTP => dCDP/dCTP,dTDP/dTTP	MISC	Information systems
contig012940	vOTU005948	contig012940_53	K00558	DNA (cytosine-5-)-methyltransferase [EC:2.1.1.37] [RN:R04858]	contig012940-cat_1_53	contig012940-cat_1	2	M	Methionine degradation	Organic Nitrogen	Amino Acid
contig012940	vOTU005948	contig012940_75	K01520	dUTP pyrophosphatase [EC:3.6.1.23] [RN:R02100]	contig012940-cat_1_75	contig012940-cat_1	2	M	Pyrimidine deoxyribonuleotide biosynthesis, CDP/CTP => dCDP/dCTP,dTDP/dTTP	MISC	Information systems
contig013017	vOTU005997	contig013017_10	K01520	dUTP pyrophosphatase [EC:3.6.1.23] [RN:R02100]	contig013017-cat_2_10	contig013017-cat_2	3	M	Pyrimidine deoxyribonuleotide biosynthesis, CDP/CTP => dCDP/dCTP,dTDP/dTTP	MISC	Information systems
contig013017	vOTU005997	contig013017_14	K21636	ribonucleoside-triphosphate reductase [EC:1.17.4.2 1.1.98.6] [RN:R02022 R11636]	contig013017-cat_2_14	contig013017-cat_2	3	M	Pyrimidine deoxyribonuleotide biosynthesis, CDP/CTP => dCDP/dCTP,dTDP/dTTP	MISC	Information systems
contig013020	vOTU006000	contig013020_14	K21636	ribonucleoside-triphosphate reductase [EC:1.17.4.2 1.1.98.6] [RN:R02022 R11636]	contig013020-cat_1_14	contig013020-cat_1	2	M	Pyrimidine deoxyribonuleotide biosynthesis, CDP/CTP => dCDP/dCTP,dTDP/dTTP	MISC	Information systems
contig013020	vOTU006000	contig013020_26	K01520	dUTP pyrophosphatase [EC:3.6.1.23] [RN:R02100]	contig013020-cat_1_26	contig013020-cat_1	2	M	Pyrimidine deoxyribonuleotide biosynthesis, CDP/CTP => dCDP/dCTP,dTDP/dTTP	MISC	Information systems
contig013024	vOTU006002	contig013024_12	K01520	dUTP pyrophosphatase [EC:3.6.1.23] [RN:R02100]	contig013024-cat_1_12	contig013024-cat_1	1	M	Pyrimidine deoxyribonuleotide biosynthesis, CDP/CTP => dCDP/dCTP,dTDP/dTTP	MISC	Information systems
contig013024	vOTU006002	contig013024_13	K00560	thymidylate synthase [EC:2.1.1.45] [RN:R02101]	contig013024-cat_1_13	contig013024-cat_1	1	M	Pyrimidine deoxyribonuleotide biosynthesis, CDP/CTP => dCDP/dCTP,dTDP/dTTP	MISC	Information systems
contig013060	vOTU006024	contig013060_24	K00558	DNA (cytosine-5-)-methyltransferase [EC:2.1.1.37] [RN:R04858]	contig013060-cat_1_24	contig013060-cat_1	2	M	Methionine degradation	Organic Nitrogen	Amino Acid
contig013076	vOTU006032	contig013076_9	K01520	dUTP pyrophosphatase [EC:3.6.1.23] [RN:R02100]	contig013076-cat_1_9	contig013076-cat_1	2	M	Pyrimidine deoxyribonuleotide biosynthesis, CDP/CTP => dCDP/dCTP,dTDP/dTTP	MISC	Information systems
contig013076	vOTU006032	contig013076_11	K21636	ribonucleoside-triphosphate reductase [EC:1.17.4.2 1.1.98.6] [RN:R02022 R11636]	contig013076-cat_1_11	contig013076-cat_1	2	MF	Pyrimidine deoxyribonuleotide biosynthesis, CDP/CTP => dCDP/dCTP,dTDP/dTTP	MISC	Information systems
contig013077	vOTU006033	contig013077_13	K00789	S-adenosylmethionine synthetase [EC:2.5.1.6] [RN:R00177]	contig013077-cat_1_13	contig013077-cat_1	2	MF	Cysteine biosynthesis, methionine => cysteine	Organic Nitrogen	Amino Acid
contig013077	vOTU006033	contig013077_13	K00789	S-adenosylmethionine synthetase [EC:2.5.1.6] [RN:R00177]	contig013077-cat_1_13	contig013077-cat_1	2	MF	Methionine degradation	Organic Nitrogen	Amino Acid
contig013078	vOTU006034	contig013078_19	K00558	DNA (cytosine-5-)-methyltransferase [EC:2.1.1.37] [RN:R04858]	contig013078-cat_1_19	contig013078-cat_1	2	M	Methionine degradation	Organic Nitrogen	Amino Acid
contig013078	vOTU006034	contig013078_26	K00789	S-adenosylmethionine synthetase [EC:2.5.1.6] [RN:R00177]	contig013078-cat_1_26	contig013078-cat_1	2	MF	Cysteine biosynthesis, methionine => cysteine	Organic Nitrogen	Amino Acid
contig013078	vOTU006034	contig013078_26	K00789	S-adenosylmethionine synthetase [EC:2.5.1.6] [RN:R00177]	contig013078-cat_1_26	contig013078-cat_1	2	MF	Methionine degradation	Organic Nitrogen	Amino Acid
contig013096	vOTU006047	contig013096_140	K02935	large subunit ribosomal protein L7/L12	contig013096-cat_1_140	contig013096-cat_1	2	M	Ribosome, bacteria	MISC	Information systems
contig013164	vOTU124206	contig013164_29	K00789	S-adenosylmethionine synthetase [EC:2.5.1.6] [RN:R00177]	contig013164-cat_1_29	contig013164-cat_1	1	M	Cysteine biosynthesis, methionine => cysteine	Organic Nitrogen	Amino Acid
contig013164	vOTU124206	contig013164_29	K00789	S-adenosylmethionine synthetase [EC:2.5.1.6] [RN:R00177]	contig013164-cat_1_29	contig013164-cat_1	1	M	Methionine degradation	Organic Nitrogen	Amino Acid
contig013298	vOTU006160	contig013298_61	K01520	dUTP pyrophosphatase [EC:3.6.1.23] [RN:R02100]	contig013298-cat_1_61	contig013298-cat_1	1	M	Pyrimidine deoxyribonuleotide biosynthesis, CDP/CTP => dCDP/dCTP,dTDP/dTTP	MISC	Information systems
contig013298	vOTU006160	contig013298_70	K21636	ribonucleoside-triphosphate reductase [EC:1.17.4.2 1.1.98.6] [RN:R02022 R11636]	contig013298-cat_1_70	contig013298-cat_1	1	M	Pyrimidine deoxyribonuleotide biosynthesis, CDP/CTP => dCDP/dCTP,dTDP/dTTP	MISC	Information systems
contig013298	vOTU006160	contig013298_115	K01939	adenylosuccinate synthase [EC:6.3.4.4] [RN:R01135]	contig013298-cat_1_115	contig013298-cat_1	2	M	Adenine ribonucleotide biosynthesis, IMP => ADP,ATP	MISC	Information systems
contig013298	vOTU006160	contig013298_129	K00656	formate acetyltransferase (pyruvate-formate lyase )	contig013298-cat_1_129	contig013298-cat_1	2	M	pyruvate metabolism	carbon utilization	pyruvate metabolism
contig013371	vOTU006202	contig013371_116	K21636	ribonucleoside-triphosphate reductase [EC:1.17.4.2 1.1.98.6] [RN:R02022 R11636]	contig013371-cat_1_116	contig013371-cat_1	2	M	Pyrimidine deoxyribonuleotide biosynthesis, CDP/CTP => dCDP/dCTP,dTDP/dTTP	MISC	Information systems
contig013371	vOTU006202	contig013371_117	K21636	ribonucleoside-triphosphate reductase [EC:1.17.4.2 1.1.98.6] [RN:R02022 R11636]	contig013371-cat_1_117	contig013371-cat_1	2	M	Pyrimidine deoxyribonuleotide biosynthesis, CDP/CTP => dCDP/dCTP,dTDP/dTTP	MISC	Information systems
contig013385	vOTU006209	contig013385_19	K01520	dUTP pyrophosphatase [EC:3.6.1.23] [RN:R02100]	contig013385-cat_1_19	contig013385-cat_1	2	M	Pyrimidine deoxyribonuleotide biosynthesis, CDP/CTP => dCDP/dCTP,dTDP/dTTP	MISC	Information systems
contig013385	vOTU006209	contig013385_65	K00789	S-adenosylmethionine synthetase [EC:2.5.1.6] [RN:R00177]	contig013385-cat_1_65	contig013385-cat_1	2	M	Cysteine biosynthesis, methionine => cysteine	Organic Nitrogen	Amino Acid
contig013385	vOTU006209	contig013385_65	K00789	S-adenosylmethionine synthetase [EC:2.5.1.6] [RN:R00177]	contig013385-cat_1_65	contig013385-cat_1	2	M	Methionine degradation	Organic Nitrogen	Amino Acid
contig013400	vOTU006219	contig013400_5	K00558	DNA (cytosine-5-)-methyltransferase [EC:2.1.1.37] [RN:R04858]	contig013400-cat_1_5	contig013400-cat_1	2	MF	Methionine degradation	Organic Nitrogen	Amino Acid
contig013405	vOTU006221	contig013405_188	K00937	polyphosphate kinase ???	contig013405-cat_1_188	contig013405-cat_1	1	M	Cytochrome d ubiquinol oxidase	Energy	Oxygen
contig013405	vOTU006221	contig013405_204	K01520	dUTP pyrophosphatase [EC:3.6.1.23] [RN:R02100]	contig013405-cat_1_204	contig013405-cat_1	1	M	Pyrimidine deoxyribonuleotide biosynthesis, CDP/CTP => dCDP/dCTP,dTDP/dTTP	MISC	Information systems
contig013405	vOTU006221	contig013405_207	K21636	ribonucleoside-triphosphate reductase [EC:1.17.4.2 1.1.98.6] [RN:R02022 R11636]	contig013405-cat_1_207	contig013405-cat_1	1	M	Pyrimidine deoxyribonuleotide biosynthesis, CDP/CTP => dCDP/dCTP,dTDP/dTTP	MISC	Information systems
contig013429	vOTU006234	contig013429_7	K00525	ribonucleoside-diphosphate reductase [EC:1.17.4.1] [RN:R02024]	contig013429-cat_1_7	contig013429-cat_1	2	MKEF	Pyrimidine deoxyribonuleotide biosynthesis, CDP/CTP => dCDP/dCTP,dTDP/dTTP	MISC	Information systems
contig013460	vOTU006249	contig013460_62	K01520	dUTP pyrophosphatase [EC:3.6.1.23] [RN:R02100]	contig013460-cat_1_62	contig013460-cat_1	2	M	Pyrimidine deoxyribonuleotide biosynthesis, CDP/CTP => dCDP/dCTP,dTDP/dTTP	MISC	Information systems
contig013481	vOTU006259	contig013481_12	GT2	GT2 cellulose synthase (EC 2.4.1.12); chitin synthase (EC 2.4.1.16); dolichyl-phosphate beta-D-mannosyltransferase (EC 2.4.1.83); dolichyl-phosphate beta-glucosyltransferase (EC 2.4.1.117); N-acetylglucosaminyltransferase (EC 2.4.1.-); N-acetylgalactosaminyltransferase (EC 2.4.1.-); hyaluronan synthase (EC 2.4.1.212); chitin oligosaccharide synthase (EC 2.4.1.-); beta-1,3-glucan synthase (EC 2.4.…	contig013481-cat_1_12	contig013481-cat_1	1	M	GlycosylTransferases	carbon utilization	CAZY
contig013502	vOTU006273	contig013502_30	K00558	DNA (cytosine-5-)-methyltransferase [EC:2.1.1.37] [RN:R04858]	contig013502-cat_1_30	contig013502-cat_1	2	M	Methionine degradation	Organic Nitrogen	Amino Acid
contig013503	vOTU006274	contig013503_7	K00558	DNA (cytosine-5-)-methyltransferase [EC:2.1.1.37] [RN:R04858]	contig013503-cat_2_7	contig013503-cat_2	3	MF	Methionine degradation	Organic Nitrogen	Amino Acid
contig013517	vOTU006284	contig013517_4	K21636	ribonucleoside-triphosphate reductase [EC:1.17.4.2 1.1.98.6] [RN:R02022 R11636]	contig013517-cat_1_4	contig013517-cat_1	2	MF	Pyrimidine deoxyribonuleotide biosynthesis, CDP/CTP => dCDP/dCTP,dTDP/dTTP	MISC	Information systems
contig013517	vOTU006284	contig013517_18	K00560	thymidylate synthase [EC:2.1.1.45] [RN:R02101]	contig013517-cat_1_18	contig013517-cat_1	2	M	Pyrimidine deoxyribonuleotide biosynthesis, CDP/CTP => dCDP/dCTP,dTDP/dTTP	MISC	Information systems
contig013532	vOTU006295	contig013532_16	K01520	dUTP pyrophosphatase [EC:3.6.1.23] [RN:R02100]	contig013532-cat_1_16	contig013532-cat_1	2	M	Pyrimidine deoxyribonuleotide biosynthesis, CDP/CTP => dCDP/dCTP,dTDP/dTTP	MISC	Information systems
contig013536	vOTU006298	contig013536_33	K01520	dUTP pyrophosphatase [EC:3.6.1.23] [RN:R02100]	contig013536-cat_1_33	contig013536-cat_1	1	M	Pyrimidine deoxyribonuleotide biosynthesis, CDP/CTP => dCDP/dCTP,dTDP/dTTP	MISC	Information systems
contig013542	vOTU006302	contig013542_36	K00560	thymidylate synthase [EC:2.1.1.45] [RN:R02101]	contig013542-cat_1_36	contig013542-cat_1	2	M	Pyrimidine deoxyribonuleotide biosynthesis, CDP/CTP => dCDP/dCTP,dTDP/dTTP	MISC	Information systems
contig013542	vOTU006302	contig013542_54	K21636	ribonucleoside-triphosphate reductase [EC:1.17.4.2 1.1.98.6] [RN:R02022 R11636]	contig013542-cat_1_54	contig013542-cat_1	2	M	Pyrimidine deoxyribonuleotide biosynthesis, CDP/CTP => dCDP/dCTP,dTDP/dTTP	MISC	Information systems
contig013542	vOTU006302	contig013542_57	K01520	dUTP pyrophosphatase [EC:3.6.1.23] [RN:R02100]	contig013542-cat_1_57	contig013542-cat_1	2	M	Pyrimidine deoxyribonuleotide biosynthesis, CDP/CTP => dCDP/dCTP,dTDP/dTTP	MISC	Information systems
contig013542	vOTU006302	contig013542_59	K01520	dUTP pyrophosphatase [EC:3.6.1.23] [RN:R02100]	contig013542-cat_1_59	contig013542-cat_1	2	M	Pyrimidine deoxyribonuleotide biosynthesis, CDP/CTP => dCDP/dCTP,dTDP/dTTP	MISC	Information systems
contig013596	vOTU006342	contig013596_44	K01939	adenylosuccinate synthase [EC:6.3.4.4] [RN:R01135]	contig013596-cat_1_44	contig013596-cat_1	1	M	Adenine ribonucleotide biosynthesis, IMP => ADP,ATP	MISC	Information systems
contig013596	vOTU006342	contig013596_124	K21636	ribonucleoside-triphosphate reductase [EC:1.17.4.2 1.1.98.6] [RN:R02022 R11636]	contig013596-cat_1_124	contig013596-cat_1	1	M	Pyrimidine deoxyribonuleotide biosynthesis, CDP/CTP => dCDP/dCTP,dTDP/dTTP	MISC	Information systems
contig013596	vOTU006342	contig013596_126	K21636	ribonucleoside-triphosphate reductase [EC:1.17.4.2 1.1.98.6] [RN:R02022 R11636]	contig013596-cat_1_126	contig013596-cat_1	1	M	Pyrimidine deoxyribonuleotide biosynthesis, CDP/CTP => dCDP/dCTP,dTDP/dTTP	MISC	Information systems
contig013596	vOTU006342	contig013596_132	K01520	dUTP pyrophosphatase [EC:3.6.1.23] [RN:R02100]	contig013596-cat_1_132	contig013596-cat_1	1	M	Pyrimidine deoxyribonuleotide biosynthesis, CDP/CTP => dCDP/dCTP,dTDP/dTTP	MISC	Information systems
contig013600	vOTU006345	contig013600_10	K01520	dUTP pyrophosphatase [EC:3.6.1.23] [RN:R02100]	contig013600-cat_1_10	contig013600-cat_1	1	M	Pyrimidine deoxyribonuleotide biosynthesis, CDP/CTP => dCDP/dCTP,dTDP/dTTP	MISC	Information systems
contig013600	vOTU006345	contig013600_11	K00560	thymidylate synthase [EC:2.1.1.45] [RN:R02101]	contig013600-cat_1_11	contig013600-cat_1	1	M	Pyrimidine deoxyribonuleotide biosynthesis, CDP/CTP => dCDP/dCTP,dTDP/dTTP	MISC	Information systems
contig013609	vOTU006352	contig013609_92	K00525	ribonucleoside-diphosphate reductase [EC:1.17.4.1] [RN:R02024]	contig013609-cat_2_92	contig013609-cat_2	3	MKE	Pyrimidine deoxyribonuleotide biosynthesis, CDP/CTP => dCDP/dCTP,dTDP/dTTP	MISC	Information systems
contig013609	vOTU006352	contig013609_97	K01520	dUTP pyrophosphatase [EC:3.6.1.23] [RN:R02100]	contig013609-cat_2_97	contig013609-cat_2	3	MF	Pyrimidine deoxyribonuleotide biosynthesis, CDP/CTP => dCDP/dCTP,dTDP/dTTP	MISC	Information systems
contig013644	vOTU006373	contig013644_23	K01520	dUTP pyrophosphatase [EC:3.6.1.23] [RN:R02100]	contig013644-cat_1_23	contig013644-cat_1	2	M	Pyrimidine deoxyribonuleotide biosynthesis, CDP/CTP => dCDP/dCTP,dTDP/dTTP	MISC	Information systems
contig013718	vOTU006418	contig013718_19	K01520	dUTP pyrophosphatase [EC:3.6.1.23] [RN:R02100]	contig013718-cat_1_19	contig013718-cat_1	2	M	Pyrimidine deoxyribonuleotide biosynthesis, CDP/CTP => dCDP/dCTP,dTDP/dTTP	MISC	Information systems
contig013748	vOTU006434	contig013748_15	K21636	ribonucleoside-triphosphate reductase [EC:1.17.4.2 1.1.98.6] [RN:R02022 R11636]	contig013748-cat_1_15	contig013748-cat_1	2	M	Pyrimidine deoxyribonuleotide biosynthesis, CDP/CTP => dCDP/dCTP,dTDP/dTTP	MISC	Information systems
contig013748	vOTU006434	contig013748_18	K01520	dUTP pyrophosphatase [EC:3.6.1.23] [RN:R02100]	contig013748-cat_1_18	contig013748-cat_1	2	MF	Pyrimidine deoxyribonuleotide biosynthesis, CDP/CTP => dCDP/dCTP,dTDP/dTTP	MISC	Information systems
contig013801	vOTU006458	contig013801_24	K01520	dUTP pyrophosphatase [EC:3.6.1.23] [RN:R02100]	contig013801-cat_1_24	contig013801-cat_1	2	M	Pyrimidine deoxyribonuleotide biosynthesis, CDP/CTP => dCDP/dCTP,dTDP/dTTP	MISC	Information systems
contig013801	vOTU006458	contig013801_25	K00525	ribonucleoside-diphosphate reductase [EC:1.17.4.1] [RN:R02024]	contig013801-cat_1_25	contig013801-cat_1	2	MKE	Pyrimidine deoxyribonuleotide biosynthesis, CDP/CTP => dCDP/dCTP,dTDP/dTTP	MISC	Information systems
contig013818	vOTU006470	contig013818_7	K01520	dUTP pyrophosphatase [EC:3.6.1.23] [RN:R02100]	contig013818-cat_2_7	contig013818-cat_2	3	MF	Pyrimidine deoxyribonuleotide biosynthesis, CDP/CTP => dCDP/dCTP,dTDP/dTTP	MISC	Information systems
contig013863	vOTU006491	contig013863_17	K01520	dUTP pyrophosphatase [EC:3.6.1.23] [RN:R02100]	contig013863-cat_1_17	contig013863-cat_1	2	M	Pyrimidine deoxyribonuleotide biosynthesis, CDP/CTP => dCDP/dCTP,dTDP/dTTP	MISC	Information systems
contig014001	vOTU006575	contig014001_26	K01520	dUTP pyrophosphatase [EC:3.6.1.23] [RN:R02100]	contig014001-cat_1_26	contig014001-cat_1	1	M	Pyrimidine deoxyribonuleotide biosynthesis, CDP/CTP => dCDP/dCTP,dTDP/dTTP	MISC	Information systems
contig014001	vOTU006575	contig014001_29	GH16	GH16 xyloglucan:xyloglucosyltransferase (EC 2.4.1.207); keratan-sulfate endo-1,4-beta-galactosidase (EC 3.2.1.103); endo-1,3-beta-glucanase / laminarinase (EC 3.2.1.39); endo-1,3(4)-beta-glucanase (EC 3.2.1.6); licheninase (EC 3.2.1.73); beta-agarase (EC 3.2.1.81); kappa;-carrageenase (EC 3.2.1.83); xyloglucanase (EC 3.2.1.151); endo-beta-1,3-galactanase (EC 3.2.1.181); [retaining] beta-porphyran…	contig014001-cat_1_29	contig014001-cat_1	1	M	Glycoside Hydrolases	carbon utilization	CAZY
contig014193	vOTU006676	contig014193_25	K21636	ribonucleoside-triphosphate reductase [EC:1.17.4.2 1.1.98.6] [RN:R02022 R11636]	contig014193-cat_1_25	contig014193-cat_1	2	M	Pyrimidine deoxyribonuleotide biosynthesis, CDP/CTP => dCDP/dCTP,dTDP/dTTP	MISC	Information systems
contig014193	vOTU006676	contig014193_26	K01494	dCTP deaminase [EC:3.5.4.13] [RN:R02325]	contig014193-cat_1_26	contig014193-cat_1	2	M	Pyrimidine deoxyribonuleotide biosynthesis, CDP/CTP => dCDP/dCTP,dTDP/dTTP	MISC	Information systems
contig014264	vOTU006714	contig014264_48	K01520	dUTP pyrophosphatase [EC:3.6.1.23] [RN:R02100]	contig014264-cat_1_48	contig014264-cat_1	2	M	Pyrimidine deoxyribonuleotide biosynthesis, CDP/CTP => dCDP/dCTP,dTDP/dTTP	MISC	Information systems
contig014289	vOTU006728	contig014289_6	K21636	ribonucleoside-triphosphate reductase [EC:1.17.4.2 1.1.98.6] [RN:R02022 R11636]	contig014289-cat_1_6	contig014289-cat_1	1	MF	Pyrimidine deoxyribonuleotide biosynthesis, CDP/CTP => dCDP/dCTP,dTDP/dTTP	MISC	Information systems
contig014417	vOTU006785	contig014417_12	K01520	dUTP pyrophosphatase [EC:3.6.1.23] [RN:R02100]	contig014417-cat_1_12	contig014417-cat_1	2	M	Pyrimidine deoxyribonuleotide biosynthesis, CDP/CTP => dCDP/dCTP,dTDP/dTTP	MISC	Information systems
contig014417	vOTU006785	contig014417_17	K21636	ribonucleoside-triphosphate reductase [EC:1.17.4.2 1.1.98.6] [RN:R02022 R11636]	contig014417-cat_1_17	contig014417-cat_1	2	M	Pyrimidine deoxyribonuleotide biosynthesis, CDP/CTP => dCDP/dCTP,dTDP/dTTP	MISC	Information systems
contig014417	vOTU006785	contig014417_19	K21636	ribonucleoside-triphosphate reductase [EC:1.17.4.2 1.1.98.6] [RN:R02022 R11636]	contig014417-cat_1_19	contig014417-cat_1	2	M	Pyrimidine deoxyribonuleotide biosynthesis, CDP/CTP => dCDP/dCTP,dTDP/dTTP	MISC	Information systems
contig014478	vOTU006818	contig014478_8	K00560	thymidylate synthase [EC:2.1.1.45] [RN:R02101]	contig014478-cat_2_8	contig014478-cat_2	3	MF	Pyrimidine deoxyribonuleotide biosynthesis, CDP/CTP => dCDP/dCTP,dTDP/dTTP	MISC	Information systems
contig014478	vOTU006818	contig014478_9	K01520	dUTP pyrophosphatase [EC:3.6.1.23] [RN:R02100]	contig014478-cat_2_9	contig014478-cat_2	3	MF	Pyrimidine deoxyribonuleotide biosynthesis, CDP/CTP => dCDP/dCTP,dTDP/dTTP	MISC	Information systems
contig014579	vOTU006861	contig014579_36	K01520	dUTP pyrophosphatase [EC:3.6.1.23] [RN:R02100]	contig014579-cat_1_36	contig014579-cat_1	2	M	Pyrimidine deoxyribonuleotide biosynthesis, CDP/CTP => dCDP/dCTP,dTDP/dTTP	MISC	Information systems
contig014579	vOTU006861	contig014579_42	K21636	ribonucleoside-triphosphate reductase [EC:1.17.4.2 1.1.98.6] [RN:R02022 R11636]	contig014579-cat_1_42	contig014579-cat_1	2	MF	Pyrimidine deoxyribonuleotide biosynthesis, CDP/CTP => dCDP/dCTP,dTDP/dTTP	MISC	Information systems
contig014579	vOTU006861	contig014579_43	K21636	ribonucleoside-triphosphate reductase [EC:1.17.4.2 1.1.98.6] [RN:R02022 R11636]	contig014579-cat_1_43	contig014579-cat_1	2	MF	Pyrimidine deoxyribonuleotide biosynthesis, CDP/CTP => dCDP/dCTP,dTDP/dTTP	MISC	Information systems
contig014644	vOTU006895	contig014644_3	K00558	DNA (cytosine-5-)-methyltransferase [EC:2.1.1.37] [RN:R04858]	contig014644-cat_1_3	contig014644-cat_1	2	MF	Methionine degradation	Organic Nitrogen	Amino Acid
contig014760	vOTU006947	contig014760_38	K01520	dUTP pyrophosphatase [EC:3.6.1.23] [RN:R02100]	contig014760-cat_1_38	contig014760-cat_1	2	M	Pyrimidine deoxyribonuleotide biosynthesis, CDP/CTP => dCDP/dCTP,dTDP/dTTP	MISC	Information systems
contig014762	vOTU006949	contig014762_22	K00558	DNA (cytosine-5-)-methyltransferase [EC:2.1.1.37] [RN:R04858]	contig014762-cat_1_22	contig014762-cat_1	2	MF	Methionine degradation	Organic Nitrogen	Amino Acid
contig014788	vOTU006963	contig014788_8	K00558	DNA (cytosine-5-)-methyltransferase [EC:2.1.1.37] [RN:R04858]	contig014788-cat_1_8	contig014788-cat_1	2	MF	Methionine degradation	Organic Nitrogen	Amino Acid
contig014869	vOTU007007	contig014869_7	K21636	ribonucleoside-triphosphate reductase [EC:1.17.4.2 1.1.98.6] [RN:R02022 R11636]	contig014869-cat_1_7	contig014869-cat_1	1	MF	Pyrimidine deoxyribonuleotide biosynthesis, CDP/CTP => dCDP/dCTP,dTDP/dTTP	MISC	Information systems
contig014869	vOTU007007	contig014869_40	K01520	dUTP pyrophosphatase [EC:3.6.1.23] [RN:R02100]	contig014869-cat_1_40	contig014869-cat_1	1	M	Pyrimidine deoxyribonuleotide biosynthesis, CDP/CTP => dCDP/dCTP,dTDP/dTTP	MISC	Information systems
contig014876	vOTU007011	contig014876_21	K01520	dUTP pyrophosphatase [EC:3.6.1.23] [RN:R02100]	contig014876-cat_1_21	contig014876-cat_1	1	M	Pyrimidine deoxyribonuleotide biosynthesis, CDP/CTP => dCDP/dCTP,dTDP/dTTP	MISC	Information systems
contig014876	vOTU007011	contig014876_27	K21636	ribonucleoside-triphosphate reductase [EC:1.17.4.2 1.1.98.6] [RN:R02022 R11636]	contig014876-cat_1_27	contig014876-cat_1	1	M	Pyrimidine deoxyribonuleotide biosynthesis, CDP/CTP => dCDP/dCTP,dTDP/dTTP	MISC	Information systems
contig014876	vOTU007011	contig014876_44	K01491	methylenetetrahydrofolate dehydrogenase (NADP+) / methenyltetrahydrofolate cyclohydrolase [EC:1.5.1.5 3.5.4.9] [RN:R01655 R01220]	contig014876-cat_1_44	contig014876-cat_1	1	M	Reductive acetyl-CoA pathway (Wood-Ljungdahl pathway)	Energy	C1
contig014964	vOTU007061	contig014964_23	K01520	dUTP pyrophosphatase [EC:3.6.1.23] [RN:R02100]	contig014964-cat_1_23	contig014964-cat_1	2	M	Pyrimidine deoxyribonuleotide biosynthesis, CDP/CTP => dCDP/dCTP,dTDP/dTTP	MISC	Information systems
contig015025	vOTU007086	contig015025_6	K00789	S-adenosylmethionine synthetase [EC:2.5.1.6] [RN:R00177]	contig015025-cat_1_6	contig015025-cat_1	2	M	Cysteine biosynthesis, methionine => cysteine	Organic Nitrogen	Amino Acid
contig015025	vOTU007086	contig015025_6	K00789	S-adenosylmethionine synthetase [EC:2.5.1.6] [RN:R00177]	contig015025-cat_1_6	contig015025-cat_1	2	M	Methionine degradation	Organic Nitrogen	Amino Acid
contig015087	vOTU007130	contig015087_5	K01520	dUTP pyrophosphatase [EC:3.6.1.23] [RN:R02100]	contig015087-cat_2_5	contig015087-cat_2	3	MF	Pyrimidine deoxyribonuleotide biosynthesis, CDP/CTP => dCDP/dCTP,dTDP/dTTP	MISC	Information systems
contig015108	vOTU007146	contig015108_115	K01520	dUTP pyrophosphatase [EC:3.6.1.23] [RN:R02100]	contig015108-cat_1_115	contig015108-cat_1	2	M	Pyrimidine deoxyribonuleotide biosynthesis, CDP/CTP => dCDP/dCTP,dTDP/dTTP	MISC	Information systems
contig015108	vOTU007146	contig015108_116	K00525	ribonucleoside-diphosphate reductase [EC:1.17.4.1] [RN:R02024]	contig015108-cat_1_116	contig015108-cat_1	2	MKE	Pyrimidine deoxyribonuleotide biosynthesis, CDP/CTP => dCDP/dCTP,dTDP/dTTP	MISC	Information systems
contig015115	vOTU007151	contig015115_28	K01520	dUTP pyrophosphatase [EC:3.6.1.23] [RN:R02100]	contig015115-cat_1_28	contig015115-cat_1	2	M	Pyrimidine deoxyribonuleotide biosynthesis, CDP/CTP => dCDP/dCTP,dTDP/dTTP	MISC	Information systems
contig015136	vOTU007163	contig015136_52	K00558	DNA (cytosine-5-)-methyltransferase [EC:2.1.1.37] [RN:R04858]	contig015136-cat_1_52	contig015136-cat_1	2	MF	Methionine degradation	Organic Nitrogen	Amino Acid
contig015188	vOTU007197	contig015188_236	K21636	ribonucleoside-triphosphate reductase [EC:1.17.4.2 1.1.98.6] [RN:R02022 R11636]	contig015188-cat_1_236	contig015188-cat_1	2	M	Pyrimidine deoxyribonuleotide biosynthesis, CDP/CTP => dCDP/dCTP,dTDP/dTTP	MISC	Information systems
contig015188	vOTU007197	contig015188_247	K01520	dUTP pyrophosphatase [EC:3.6.1.23] [RN:R02100]	contig015188-cat_1_247	contig015188-cat_1	2	M	Pyrimidine deoxyribonuleotide biosynthesis, CDP/CTP => dCDP/dCTP,dTDP/dTTP	MISC	Information systems
contig015211	vOTU007211	contig015211_12	K01520	dUTP pyrophosphatase [EC:3.6.1.23] [RN:R02100]	contig015211-cat_1_12	contig015211-cat_1	2	M	Pyrimidine deoxyribonuleotide biosynthesis, CDP/CTP => dCDP/dCTP,dTDP/dTTP	MISC	Information systems
contig015213	vOTU007213	contig015213_7	K01520	dUTP pyrophosphatase [EC:3.6.1.23] [RN:R02100]	contig015213-cat_1_7	contig015213-cat_1	2	MF	Pyrimidine deoxyribonuleotide biosynthesis, CDP/CTP => dCDP/dCTP,dTDP/dTTP	MISC	Information systems
contig015216	vOTU007216	contig015216_82	K01939	adenylosuccinate synthase [EC:6.3.4.4] [RN:R01135]	contig015216-cat_1_82	contig015216-cat_1	1	M	Adenine ribonucleotide biosynthesis, IMP => ADP,ATP	MISC	Information systems
contig015216	vOTU007216	contig015216_156	K00525	ribonucleoside-diphosphate reductase [EC:1.17.4.1] [RN:R02024]	contig015216-cat_1_156	contig015216-cat_1	1	MKE	Pyrimidine deoxyribonuleotide biosynthesis, CDP/CTP => dCDP/dCTP,dTDP/dTTP	MISC	Information systems
contig015216	vOTU007216	contig015216_159	K01520	dUTP pyrophosphatase [EC:3.6.1.23] [RN:R02100]	contig015216-cat_1_159	contig015216-cat_1	1	M	Pyrimidine deoxyribonuleotide biosynthesis, CDP/CTP => dCDP/dCTP,dTDP/dTTP	MISC	Information systems
contig015276	vOTU007257	contig015276_217	K01520	dUTP pyrophosphatase [EC:3.6.1.23] [RN:R02100]	contig015276-cat_1_217	contig015276-cat_1	1	M	Pyrimidine deoxyribonuleotide biosynthesis, CDP/CTP => dCDP/dCTP,dTDP/dTTP	MISC	Information systems
contig015402	vOTU007337	contig015402_8	K01520	dUTP pyrophosphatase [EC:3.6.1.23] [RN:R02100]	contig015402-cat_2_8	contig015402-cat_2	3	MF	Pyrimidine deoxyribonuleotide biosynthesis, CDP/CTP => dCDP/dCTP,dTDP/dTTP	MISC	Information systems
contig015402	vOTU007337	contig015402_15	K00525	ribonucleoside-diphosphate reductase [EC:1.17.4.1] [RN:R02024]	contig015402-cat_2_15	contig015402-cat_2	3	MKE	Pyrimidine deoxyribonuleotide biosynthesis, CDP/CTP => dCDP/dCTP,dTDP/dTTP	MISC	Information systems
contig015413	vOTU007346	contig015413_28	K01520	dUTP pyrophosphatase [EC:3.6.1.23] [RN:R02100]	contig015413-cat_1_28	contig015413-cat_1	2	M	Pyrimidine deoxyribonuleotide biosynthesis, CDP/CTP => dCDP/dCTP,dTDP/dTTP	MISC	Information systems
contig015416	vOTU007349	contig015416_56	K01520	dUTP pyrophosphatase [EC:3.6.1.23] [RN:R02100]	contig015416-cat_1_56	contig015416-cat_1	2	M	Pyrimidine deoxyribonuleotide biosynthesis, CDP/CTP => dCDP/dCTP,dTDP/dTTP	MISC	Information systems
contig015416	vOTU007349	contig015416_75	K00558	DNA (cytosine-5-)-methyltransferase [EC:2.1.1.37] [RN:R04858]	contig015416-cat_1_75	contig015416-cat_1	2	M	Methionine degradation	Organic Nitrogen	Amino Acid
contig015421	vOTU007352	contig015421_31	K01520	dUTP pyrophosphatase [EC:3.6.1.23] [RN:R02100]	contig015421-cat_1_31	contig015421-cat_1	2	M	Pyrimidine deoxyribonuleotide biosynthesis, CDP/CTP => dCDP/dCTP,dTDP/dTTP	MISC	Information systems
contig015463	vOTU007379	contig015463_2	K21636	ribonucleoside-triphosphate reductase [EC:1.17.4.2 1.1.98.6] [RN:R02022 R11636]	contig015463-cat_2_2	contig015463-cat_2	3	MF	Pyrimidine deoxyribonuleotide biosynthesis, CDP/CTP => dCDP/dCTP,dTDP/dTTP	MISC	Information systems
contig015544	vOTU007429	contig015544_29	K01520	dUTP pyrophosphatase [EC:3.6.1.23] [RN:R02100]	contig015544-cat_1_29	contig015544-cat_1	2	M	Pyrimidine deoxyribonuleotide biosynthesis, CDP/CTP => dCDP/dCTP,dTDP/dTTP	MISC	Information systems
contig015544	vOTU007429	contig015544_84	K00558	DNA (cytosine-5-)-methyltransferase [EC:2.1.1.37] [RN:R04858]	contig015544-cat_1_84	contig015544-cat_1	2	M	Methionine degradation	Organic Nitrogen	Amino Acid
contig015551	vOTU007434	contig015551_37	K01520	dUTP pyrophosphatase [EC:3.6.1.23] [RN:R02100]	contig015551-cat_1_37	contig015551-cat_1	2	M	Pyrimidine deoxyribonuleotide biosynthesis, CDP/CTP => dCDP/dCTP,dTDP/dTTP	MISC	Information systems
contig015605	vOTU007473	contig015605_11	K01520	dUTP pyrophosphatase [EC:3.6.1.23] [RN:R02100]	contig015605-cat_1_11	contig015605-cat_1	2	M	Pyrimidine deoxyribonuleotide biosynthesis, CDP/CTP => dCDP/dCTP,dTDP/dTTP	MISC	Information systems
contig015606	vOTU007474	contig015606_18	K01520	dUTP pyrophosphatase [EC:3.6.1.23] [RN:R02100]	contig015606-cat_2_18	contig015606-cat_2	3	M	Pyrimidine deoxyribonuleotide biosynthesis, CDP/CTP => dCDP/dCTP,dTDP/dTTP	MISC	Information systems
contig015606	vOTU007474	contig015606_19	K00525	ribonucleoside-diphosphate reductase [EC:1.17.4.1] [RN:R02024]	contig015606-cat_2_19	contig015606-cat_2	3	MKE	Pyrimidine deoxyribonuleotide biosynthesis, CDP/CTP => dCDP/dCTP,dTDP/dTTP	MISC	Information systems
contig015670	vOTU007512	contig015670_57	K21636	ribonucleoside-triphosphate reductase [EC:1.17.4.2 1.1.98.6] [RN:R02022 R11636]	contig015670-cat_1_57	contig015670-cat_1	2	M	Pyrimidine deoxyribonuleotide biosynthesis, CDP/CTP => dCDP/dCTP,dTDP/dTTP	MISC	Information systems
contig015670	vOTU007512	contig015670_60	K01520	dUTP pyrophosphatase [EC:3.6.1.23] [RN:R02100]	contig015670-cat_1_60	contig015670-cat_1	2	M	Pyrimidine deoxyribonuleotide biosynthesis, CDP/CTP => dCDP/dCTP,dTDP/dTTP	MISC	Information systems
contig015671	vOTU007513	contig015671_57	K21636	ribonucleoside-triphosphate reductase [EC:1.17.4.2 1.1.98.6] [RN:R02022 R11636]	contig015671-cat_1_57	contig015671-cat_1	1	M	Pyrimidine deoxyribonuleotide biosynthesis, CDP/CTP => dCDP/dCTP,dTDP/dTTP	MISC	Information systems
contig015671	vOTU007513	contig015671_58	K21636	ribonucleoside-triphosphate reductase [EC:1.17.4.2 1.1.98.6] [RN:R02022 R11636]	contig015671-cat_1_58	contig015671-cat_1	1	M	Pyrimidine deoxyribonuleotide biosynthesis, CDP/CTP => dCDP/dCTP,dTDP/dTTP	MISC	Information systems
contig015707	vOTU007535	contig015707_10	K21636	ribonucleoside-triphosphate reductase [EC:1.17.4.2 1.1.98.6] [RN:R02022 R11636]	contig015707-cat_1_10	contig015707-cat_1	2	M	Pyrimidine deoxyribonuleotide biosynthesis, CDP/CTP => dCDP/dCTP,dTDP/dTTP	MISC	Information systems
contig015737	vOTU007552	contig015737_39	K01520	dUTP pyrophosphatase [EC:3.6.1.23] [RN:R02100]	contig015737-cat_1_39	contig015737-cat_1	1	M	Pyrimidine deoxyribonuleotide biosynthesis, CDP/CTP => dCDP/dCTP,dTDP/dTTP	MISC	Information systems
contig015737	vOTU007552	contig015737_43	K21636	ribonucleoside-triphosphate reductase [EC:1.17.4.2 1.1.98.6] [RN:R02022 R11636]	contig015737-cat_1_43	contig015737-cat_1	1	M	Pyrimidine deoxyribonuleotide biosynthesis, CDP/CTP => dCDP/dCTP,dTDP/dTTP	MISC	Information systems
contig015737	vOTU007552	contig015737_45	K21636	ribonucleoside-triphosphate reductase [EC:1.17.4.2 1.1.98.6] [RN:R02022 R11636]	contig015737-cat_1_45	contig015737-cat_1	1	M	Pyrimidine deoxyribonuleotide biosynthesis, CDP/CTP => dCDP/dCTP,dTDP/dTTP	MISC	Information systems
contig015758	vOTU007569	contig015758_77	K01520	dUTP pyrophosphatase [EC:3.6.1.23] [RN:R02100]	contig015758-cat_1_77	contig015758-cat_1	1	M	Pyrimidine deoxyribonuleotide biosynthesis, CDP/CTP => dCDP/dCTP,dTDP/dTTP	MISC	Information systems
contig015806	vOTU007599	contig015806_15	K01520	dUTP pyrophosphatase [EC:3.6.1.23] [RN:R02100]	contig015806-cat_1_15	contig015806-cat_1	2	MF	Pyrimidine deoxyribonuleotide biosynthesis, CDP/CTP => dCDP/dCTP,dTDP/dTTP	MISC	Information systems
contig015816	vOTU007608	contig015816_3	K01494	dCTP deaminase [EC:3.5.4.13] [RN:R02325]	contig015816-cat_1_3	contig015816-cat_1	2	MF	Pyrimidine deoxyribonuleotide biosynthesis, CDP/CTP => dCDP/dCTP,dTDP/dTTP	MISC	Information systems
contig015830	vOTU007618	contig015830_24	K01520	dUTP pyrophosphatase [EC:3.6.1.23] [RN:R02100]	contig015830-cat_1_24	contig015830-cat_1	1	M	Pyrimidine deoxyribonuleotide biosynthesis, CDP/CTP => dCDP/dCTP,dTDP/dTTP	MISC	Information systems
contig015866	vOTU007645	contig015866_31	K01520	dUTP pyrophosphatase [EC:3.6.1.23] [RN:R02100]	contig015866-cat_1_31	contig015866-cat_1	1	M	Pyrimidine deoxyribonuleotide biosynthesis, CDP/CTP => dCDP/dCTP,dTDP/dTTP	MISC	Information systems
contig015870	vOTU007648	contig015870_97	K21636	ribonucleoside-triphosphate reductase [EC:1.17.4.2 1.1.98.6] [RN:R02022 R11636]	contig015870-cat_1_97	contig015870-cat_1	2	M	Pyrimidine deoxyribonuleotide biosynthesis, CDP/CTP => dCDP/dCTP,dTDP/dTTP	MISC	Information systems
contig015870	vOTU007648	contig015870_102	K21636	ribonucleoside-triphosphate reductase [EC:1.17.4.2 1.1.98.6] [RN:R02022 R11636]	contig015870-cat_1_102	contig015870-cat_1	2	M	Pyrimidine deoxyribonuleotide biosynthesis, CDP/CTP => dCDP/dCTP,dTDP/dTTP	MISC	Information systems
contig015870	vOTU007648	contig015870_107	K01520	dUTP pyrophosphatase [EC:3.6.1.23] [RN:R02100]	contig015870-cat_1_107	contig015870-cat_1	2	M	Pyrimidine deoxyribonuleotide biosynthesis, CDP/CTP => dCDP/dCTP,dTDP/dTTP	MISC	Information systems
contig015872	vOTU007650	contig015872_10	K21636	ribonucleoside-triphosphate reductase [EC:1.17.4.2 1.1.98.6] [RN:R02022 R11636]	contig015872-cat_1_10	contig015872-cat_1	1	M	Pyrimidine deoxyribonuleotide biosynthesis, CDP/CTP => dCDP/dCTP,dTDP/dTTP	MISC	Information systems
contig015872	vOTU007650	contig015872_11	K01494	dCTP deaminase [EC:3.5.4.13] [RN:R02325]	contig015872-cat_1_11	contig015872-cat_1	1	M	Pyrimidine deoxyribonuleotide biosynthesis, CDP/CTP => dCDP/dCTP,dTDP/dTTP	MISC	Information systems
contig015885	vOTU007659	contig015885_20	K00558	DNA (cytosine-5-)-methyltransferase [EC:2.1.1.37] [RN:R04858]	contig015885-cat_1_20	contig015885-cat_1	1	M	Methionine degradation	Organic Nitrogen	Amino Acid
contig015891	vOTU007663	contig015891_37	K00558	DNA (cytosine-5-)-methyltransferase [EC:2.1.1.37] [RN:R04858]	contig015891-cat_1_37	contig015891-cat_1	2	M	Methionine degradation	Organic Nitrogen	Amino Acid
contig015893	vOTU007664	contig015893_14	K21636	ribonucleoside-triphosphate reductase [EC:1.17.4.2 1.1.98.6] [RN:R02022 R11636]	contig015893-cat_1_14	contig015893-cat_1	1	M	Pyrimidine deoxyribonuleotide biosynthesis, CDP/CTP => dCDP/dCTP,dTDP/dTTP	MISC	Information systems
contig015933	vOTU007692	contig015933_36	K01520	dUTP pyrophosphatase [EC:3.6.1.23] [RN:R02100]	contig015933-cat_1_36	contig015933-cat_1	2	M	Pyrimidine deoxyribonuleotide biosynthesis, CDP/CTP => dCDP/dCTP,dTDP/dTTP	MISC	Information systems
contig016048	vOTU007768	contig016048_48	K01520	dUTP pyrophosphatase [EC:3.6.1.23] [RN:R02100]	contig016048-cat_1_48	contig016048-cat_1	2	M	Pyrimidine deoxyribonuleotide biosynthesis, CDP/CTP => dCDP/dCTP,dTDP/dTTP	MISC	Information systems
contig016087	vOTU007794	contig016087_26	K00558	DNA (cytosine-5-)-methyltransferase [EC:2.1.1.37] [RN:R04858]	contig016087-cat_1_26	contig016087-cat_1	1	M	Methionine degradation	Organic Nitrogen	Amino Acid
contig016098	vOTU007800	contig016098_37	K00558	DNA (cytosine-5-)-methyltransferase [EC:2.1.1.37] [RN:R04858]	contig016098-cat_1_37	contig016098-cat_1	2	M	Methionine degradation	Organic Nitrogen	Amino Acid
contig016137	vOTU007818	contig016137_25	K21636	ribonucleoside-triphosphate reductase [EC:1.17.4.2 1.1.98.6] [RN:R02022 R11636]	contig016137-cat_1_25	contig016137-cat_1	2	M	Pyrimidine deoxyribonuleotide biosynthesis, CDP/CTP => dCDP/dCTP,dTDP/dTTP	MISC	Information systems
contig016137	vOTU007818	contig016137_31	K01520	dUTP pyrophosphatase [EC:3.6.1.23] [RN:R02100]	contig016137-cat_1_31	contig016137-cat_1	2	M	Pyrimidine deoxyribonuleotide biosynthesis, CDP/CTP => dCDP/dCTP,dTDP/dTTP	MISC	Information systems
contig016137	vOTU007818	contig016137_61	GT2	GT2 cellulose synthase (EC 2.4.1.12); chitin synthase (EC 2.4.1.16); dolichyl-phosphate beta-D-mannosyltransferase (EC 2.4.1.83); dolichyl-phosphate beta-glucosyltransferase (EC 2.4.1.117); N-acetylglucosaminyltransferase (EC 2.4.1.-); N-acetylgalactosaminyltransferase (EC 2.4.1.-); hyaluronan synthase (EC 2.4.1.212); chitin oligosaccharide synthase (EC 2.4.1.-); beta-1,3-glucan synthase (EC 2.4.…	contig016137-cat_1_61	contig016137-cat_1	2	M	GlycosylTransferases	carbon utilization	CAZY
contig016243	vOTU007870	contig016243_33	K21636	ribonucleoside-triphosphate reductase [EC:1.17.4.2 1.1.98.6] [RN:R02022 R11636]	contig016243-cat_2_33	contig016243-cat_2	3	MF	Pyrimidine deoxyribonuleotide biosynthesis, CDP/CTP => dCDP/dCTP,dTDP/dTTP	MISC	Information systems
contig016243	vOTU007870	contig016243_38	K01520	dUTP pyrophosphatase [EC:3.6.1.23] [RN:R02100]	contig016243-cat_2_38	contig016243-cat_2	3	MF	Pyrimidine deoxyribonuleotide biosynthesis, CDP/CTP => dCDP/dCTP,dTDP/dTTP	MISC	Information systems
contig016260	vOTU007878	contig016260_22	K21636	ribonucleoside-triphosphate reductase [EC:1.17.4.2 1.1.98.6] [RN:R02022 R11636]	contig016260-cat_1_22	contig016260-cat_1	2	M	Pyrimidine deoxyribonuleotide biosynthesis, CDP/CTP => dCDP/dCTP,dTDP/dTTP	MISC	Information systems
contig016260	vOTU007878	contig016260_24	K21636	ribonucleoside-triphosphate reductase [EC:1.17.4.2 1.1.98.6] [RN:R02022 R11636]	contig016260-cat_1_24	contig016260-cat_1	2	M	Pyrimidine deoxyribonuleotide biosynthesis, CDP/CTP => dCDP/dCTP,dTDP/dTTP	MISC	Information systems
contig016260	vOTU007878	contig016260_34	K01520	dUTP pyrophosphatase [EC:3.6.1.23] [RN:R02100]	contig016260-cat_1_34	contig016260-cat_1	2	M	Pyrimidine deoxyribonuleotide biosynthesis, CDP/CTP => dCDP/dCTP,dTDP/dTTP	MISC	Information systems
contig016284	vOTU007896	contig016284_6	K21636	ribonucleoside-triphosphate reductase [EC:1.17.4.2 1.1.98.6] [RN:R02022 R11636]	contig016284-cat_1_6	contig016284-cat_1	2	MF	Pyrimidine deoxyribonuleotide biosynthesis, CDP/CTP => dCDP/dCTP,dTDP/dTTP	MISC	Information systems
contig016284	vOTU007896	contig016284_11	K01520	dUTP pyrophosphatase [EC:3.6.1.23] [RN:R02100]	contig016284-cat_1_11	contig016284-cat_1	2	M	Pyrimidine deoxyribonuleotide biosynthesis, CDP/CTP => dCDP/dCTP,dTDP/dTTP	MISC	Information systems
contig016332	vOTU007923	contig016332_18	K21636	ribonucleoside-triphosphate reductase [EC:1.17.4.2 1.1.98.6] [RN:R02022 R11636]	contig016332-cat_1_18	contig016332-cat_1	2	M	Pyrimidine deoxyribonuleotide biosynthesis, CDP/CTP => dCDP/dCTP,dTDP/dTTP	MISC	Information systems
contig016332	vOTU007923	contig016332_20	K21636	ribonucleoside-triphosphate reductase [EC:1.17.4.2 1.1.98.6] [RN:R02022 R11636]	contig016332-cat_1_20	contig016332-cat_1	2	M	Pyrimidine deoxyribonuleotide biosynthesis, CDP/CTP => dCDP/dCTP,dTDP/dTTP	MISC	Information systems
contig016343	vOTU007931	contig016343_65	K00558	DNA (cytosine-5-)-methyltransferase [EC:2.1.1.37] [RN:R04858]	contig016343-cat_1_65	contig016343-cat_1	2	M	Methionine degradation	Organic Nitrogen	Amino Acid
contig016405	vOTU106481	contig016405_21	K01494	dCTP deaminase [EC:3.5.4.13] [RN:R02325]	contig016405-cat_1_21	contig016405-cat_1	1	M	Pyrimidine deoxyribonuleotide biosynthesis, CDP/CTP => dCDP/dCTP,dTDP/dTTP	MISC	Information systems
contig016410	vOTU007970	contig016410_16	K01520	dUTP pyrophosphatase [EC:3.6.1.23] [RN:R02100]	contig016410-cat_2_16	contig016410-cat_2	3	MF	Pyrimidine deoxyribonuleotide biosynthesis, CDP/CTP => dCDP/dCTP,dTDP/dTTP	MISC	Information systems
contig016410	vOTU007970	contig016410_18	K00558	DNA (cytosine-5-)-methyltransferase [EC:2.1.1.37] [RN:R04858]	contig016410-cat_2_18	contig016410-cat_2	3	MF	Methionine degradation	Organic Nitrogen	Amino Acid
contig016503	vOTU008028	contig016503_41	K00558	DNA (cytosine-5-)-methyltransferase [EC:2.1.1.37] [RN:R04858]	contig016503-cat_1_41	contig016503-cat_1	2	M	Methionine degradation	Organic Nitrogen	Amino Acid
contig016562	vOTU008063	contig016562_11	K01520	dUTP pyrophosphatase [EC:3.6.1.23] [RN:R02100]	contig016562-cat_1_11	contig016562-cat_1	2	MF	Pyrimidine deoxyribonuleotide biosynthesis, CDP/CTP => dCDP/dCTP,dTDP/dTTP	MISC	Information systems
contig016579	vOTU008074	contig016579_23	K00558	DNA (cytosine-5-)-methyltransferase [EC:2.1.1.37] [RN:R04858]	contig016579-cat_1_23	contig016579-cat_1	1	M	Methionine degradation	Organic Nitrogen	Amino Acid
contig016610	vOTU008090	contig016610_26	K01494	dCTP deaminase [EC:3.5.4.13] [RN:R02325]	contig016610-cat_1_26	contig016610-cat_1	2	M	Pyrimidine deoxyribonuleotide biosynthesis, CDP/CTP => dCDP/dCTP,dTDP/dTTP	MISC	Information systems
contig016627	vOTU008099	contig016627_23	K21636	ribonucleoside-triphosphate reductase [EC:1.17.4.2 1.1.98.6] [RN:R02022 R11636]	contig016627-cat_1_23	contig016627-cat_1	2	MF	Pyrimidine deoxyribonuleotide biosynthesis, CDP/CTP => dCDP/dCTP,dTDP/dTTP	MISC	Information systems
contig016661	vOTU008117	contig016661_27	K21636	ribonucleoside-triphosphate reductase [EC:1.17.4.2 1.1.98.6] [RN:R02022 R11636]	contig016661-cat_1_27	contig016661-cat_1	2	M	Pyrimidine deoxyribonuleotide biosynthesis, CDP/CTP => dCDP/dCTP,dTDP/dTTP	MISC	Information systems
contig016661	vOTU008117	contig016661_28	K21636	ribonucleoside-triphosphate reductase [EC:1.17.4.2 1.1.98.6] [RN:R02022 R11636]	contig016661-cat_1_28	contig016661-cat_1	2	M	Pyrimidine deoxyribonuleotide biosynthesis, CDP/CTP => dCDP/dCTP,dTDP/dTTP	MISC	Information systems
contig016774	vOTU008179	contig016774_27	K01520	dUTP pyrophosphatase [EC:3.6.1.23] [RN:R02100]	contig016774-cat_1_27	contig016774-cat_1	2	MF	Pyrimidine deoxyribonuleotide biosynthesis, CDP/CTP => dCDP/dCTP,dTDP/dTTP	MISC	Information systems
contig016790	vOTU008189	contig016790_23	K21636	ribonucleoside-triphosphate reductase [EC:1.17.4.2 1.1.98.6] [RN:R02022 R11636]	contig016790-cat_1_23	contig016790-cat_1	2	M	Pyrimidine deoxyribonuleotide biosynthesis, CDP/CTP => dCDP/dCTP,dTDP/dTTP	MISC	Information systems
contig016790	vOTU008189	contig016790_25	K21636	ribonucleoside-triphosphate reductase [EC:1.17.4.2 1.1.98.6] [RN:R02022 R11636]	contig016790-cat_1_25	contig016790-cat_1	2	M	Pyrimidine deoxyribonuleotide biosynthesis, CDP/CTP => dCDP/dCTP,dTDP/dTTP	MISC	Information systems
contig016797	vOTU008194	contig016797_15	K00558	DNA (cytosine-5-)-methyltransferase [EC:2.1.1.37] [RN:R04858]	contig016797-cat_1_15	contig016797-cat_1	2	M	Methionine degradation	Organic Nitrogen	Amino Acid
contig016822	vOTU008211	contig016822_12	K09883	cobT; cobaltochelatase CobT [EC:6.6.1.2]	contig016822-cat_1_12	contig016822-cat_1	2	M	Cobalamin biosynthesis, precorrin2 => cobinamide	MISC	aerobic corrin ring synthesis
contig016822	vOTU008211	contig016822_14	K09882	cobS; cobaltochelatase CobS [EC:6.6.1.2]	contig016822-cat_1_14	contig016822-cat_1	2	MF	Cobalamin biosynthesis, precorrin2 => cobinamide	MISC	aerobic corrin ring synthesis
contig016849	vOTU008228	contig016849_34	K00558	DNA (cytosine-5-)-methyltransferase [EC:2.1.1.37] [RN:R04858]	contig016849-cat_1_34	contig016849-cat_1	1	M	Methionine degradation	Organic Nitrogen	Amino Acid
contig017053	vOTU008336	contig017053_20	K00558	DNA (cytosine-5-)-methyltransferase [EC:2.1.1.37] [RN:R04858]	contig017053-cat_1_20	contig017053-cat_1	2	M	Methionine degradation	Organic Nitrogen	Amino Acid
contig017070	vOTU008345	contig017070_43	K01520	dUTP pyrophosphatase [EC:3.6.1.23] [RN:R02100]	contig017070-cat_1_43	contig017070-cat_1	2	M	Pyrimidine deoxyribonuleotide biosynthesis, CDP/CTP => dCDP/dCTP,dTDP/dTTP	MISC	Information systems
contig017070	vOTU008345	contig017070_64	K21636	ribonucleoside-triphosphate reductase [EC:1.17.4.2 1.1.98.6] [RN:R02022 R11636]	contig017070-cat_1_64	contig017070-cat_1	2	M	Pyrimidine deoxyribonuleotide biosynthesis, CDP/CTP => dCDP/dCTP,dTDP/dTTP	MISC	Information systems
contig017079	vOTU008350	contig017079_42	K01494	dCTP deaminase [EC:3.5.4.13] [RN:R02325]	contig017079-cat_1_42	contig017079-cat_1	2	M	Pyrimidine deoxyribonuleotide biosynthesis, CDP/CTP => dCDP/dCTP,dTDP/dTTP	MISC	Information systems
contig017137	vOTU008384	contig017137_14	K21636	ribonucleoside-triphosphate reductase [EC:1.17.4.2 1.1.98.6] [RN:R02022 R11636]	contig017137-cat_1_14	contig017137-cat_1	1	M	Pyrimidine deoxyribonuleotide biosynthesis, CDP/CTP => dCDP/dCTP,dTDP/dTTP	MISC	Information systems
contig017137	vOTU008384	contig017137_21	K01520	dUTP pyrophosphatase [EC:3.6.1.23] [RN:R02100]	contig017137-cat_1_21	contig017137-cat_1	1	MF	Pyrimidine deoxyribonuleotide biosynthesis, CDP/CTP => dCDP/dCTP,dTDP/dTTP	MISC	Information systems
contig017200	vOTU010969	contig017200_55	K01520	dUTP pyrophosphatase [EC:3.6.1.23] [RN:R02100]	contig017200-cat_1_55	contig017200-cat_1	2	MF	Pyrimidine deoxyribonuleotide biosynthesis, CDP/CTP => dCDP/dCTP,dTDP/dTTP	MISC	Information systems
contig017231	vOTU008411	contig017231_36	K01520	dUTP pyrophosphatase [EC:3.6.1.23] [RN:R02100]	contig017231-cat_1_36	contig017231-cat_1	2	MF	Pyrimidine deoxyribonuleotide biosynthesis, CDP/CTP => dCDP/dCTP,dTDP/dTTP	MISC	Information systems
contig017262	vOTU014015	contig017262_20	K01520	dUTP pyrophosphatase [EC:3.6.1.23] [RN:R02100]	contig017262-cat_1_20	contig017262-cat_1	1	M	Pyrimidine deoxyribonuleotide biosynthesis, CDP/CTP => dCDP/dCTP,dTDP/dTTP	MISC	Information systems
contig017262	vOTU014015	contig017262_25	K21636	ribonucleoside-triphosphate reductase [EC:1.17.4.2 1.1.98.6] [RN:R02022 R11636]	contig017262-cat_1_25	contig017262-cat_1	1	M	Pyrimidine deoxyribonuleotide biosynthesis, CDP/CTP => dCDP/dCTP,dTDP/dTTP	MISC	Information systems
contig017262	vOTU014015	contig017262_162	K02935	large subunit ribosomal protein L7/L12	contig017262-cat_1_162	contig017262-cat_1	1	M	Ribosome, bacteria	MISC	Information systems
contig017266	vOTU008491	contig017266_26	K21636	ribonucleoside-triphosphate reductase [EC:1.17.4.2 1.1.98.6] [RN:R02022 R11636]	contig017266-cat_1_26	contig017266-cat_1	2	M	Pyrimidine deoxyribonuleotide biosynthesis, CDP/CTP => dCDP/dCTP,dTDP/dTTP	MISC	Information systems
contig017266	vOTU008491	contig017266_32	K01520	dUTP pyrophosphatase [EC:3.6.1.23] [RN:R02100]	contig017266-cat_1_32	contig017266-cat_1	2	M	Pyrimidine deoxyribonuleotide biosynthesis, CDP/CTP => dCDP/dCTP,dTDP/dTTP	MISC	Information systems
contig017311	vOTU008423	contig017311_61	K21636	ribonucleoside-triphosphate reductase [EC:1.17.4.2 1.1.98.6] [RN:R02022 R11636]	contig017311-cat_1_61	contig017311-cat_1	2	M	Pyrimidine deoxyribonuleotide biosynthesis, CDP/CTP => dCDP/dCTP,dTDP/dTTP	MISC	Information systems
contig017311	vOTU008423	contig017311_145	K01520	dUTP pyrophosphatase [EC:3.6.1.23] [RN:R02100]	contig017311-cat_1_145	contig017311-cat_1	2	M	Pyrimidine deoxyribonuleotide biosynthesis, CDP/CTP => dCDP/dCTP,dTDP/dTTP	MISC	Information systems
contig017477	vOTU008481	contig017477_7	K21636	ribonucleoside-triphosphate reductase [EC:1.17.4.2 1.1.98.6] [RN:R02022 R11636]	contig017477-cat_1_7	contig017477-cat_1	2	MF	Pyrimidine deoxyribonuleotide biosynthesis, CDP/CTP => dCDP/dCTP,dTDP/dTTP	MISC	Information systems
contig017523	vOTU008493	contig017523_13	K00560	thymidylate synthase [EC:2.1.1.45] [RN:R02101]	contig017523-cat_1_13	contig017523-cat_1	2	M	Pyrimidine deoxyribonuleotide biosynthesis, CDP/CTP => dCDP/dCTP,dTDP/dTTP	MISC	Information systems
contig017523	vOTU008493	contig017523_15	K01520	dUTP pyrophosphatase [EC:3.6.1.23] [RN:R02100]	contig017523-cat_1_15	contig017523-cat_1	2	M	Pyrimidine deoxyribonuleotide biosynthesis, CDP/CTP => dCDP/dCTP,dTDP/dTTP	MISC	Information systems
contig017758	vOTU008566	contig017758_117	K21636	ribonucleoside-triphosphate reductase [EC:1.17.4.2 1.1.98.6] [RN:R02022 R11636]	contig017758-cat_1_117	contig017758-cat_1	1	M	Pyrimidine deoxyribonuleotide biosynthesis, CDP/CTP => dCDP/dCTP,dTDP/dTTP	MISC	Information systems
contig017849	vOTU008588	contig017849_55	K01520	dUTP pyrophosphatase [EC:3.6.1.23] [RN:R02100]	contig017849-cat_1_55	contig017849-cat_1	2	M	Pyrimidine deoxyribonuleotide biosynthesis, CDP/CTP => dCDP/dCTP,dTDP/dTTP	MISC	Information systems
contig017850	vOTU008589	contig017850_3	K00558	DNA (cytosine-5-)-methyltransferase [EC:2.1.1.37] [RN:R04858]	contig017850-cat_1_3	contig017850-cat_1	2	MF	Methionine degradation	Organic Nitrogen	Amino Acid
contig017850	vOTU008589	contig017850_4	K00789	S-adenosylmethionine synthetase [EC:2.5.1.6] [RN:R00177]	contig017850-cat_1_4	contig017850-cat_1	2	MF	Cysteine biosynthesis, methionine => cysteine	Organic Nitrogen	Amino Acid
contig017850	vOTU008589	contig017850_4	K00789	S-adenosylmethionine synthetase [EC:2.5.1.6] [RN:R00177]	contig017850-cat_1_4	contig017850-cat_1	2	MF	Methionine degradation	Organic Nitrogen	Amino Acid
contig017857	vOTU008591	contig017857_14	K01520	dUTP pyrophosphatase [EC:3.6.1.23] [RN:R02100]	contig017857-cat_1_14	contig017857-cat_1	1	M	Pyrimidine deoxyribonuleotide biosynthesis, CDP/CTP => dCDP/dCTP,dTDP/dTTP	MISC	Information systems
contig017857	vOTU008591	contig017857_151	K21636	ribonucleoside-triphosphate reductase [EC:1.17.4.2 1.1.98.6] [RN:R02022 R11636]	contig017857-cat_1_151	contig017857-cat_1	2	M	Pyrimidine deoxyribonuleotide biosynthesis, CDP/CTP => dCDP/dCTP,dTDP/dTTP	MISC	Information systems
contig017888	vOTU008602	contig017888_10	K00558	DNA (cytosine-5-)-methyltransferase [EC:2.1.1.37] [RN:R04858]	contig017888-cat_1_10	contig017888-cat_1	1	MF	Methionine degradation	Organic Nitrogen	Amino Acid
contig018002	vOTU008630	contig018002_222	K01939	adenylosuccinate synthase [EC:6.3.4.4] [RN:R01135]	contig018002-cat_1_222	contig018002-cat_1	2	M	Adenine ribonucleotide biosynthesis, IMP => ADP,ATP	MISC	Information systems
contig018002	vOTU008630	contig018002_277	K21636	ribonucleoside-triphosphate reductase [EC:1.17.4.2 1.1.98.6] [RN:R02022 R11636]	contig018002-cat_1_277	contig018002-cat_1	2	M	Pyrimidine deoxyribonuleotide biosynthesis, CDP/CTP => dCDP/dCTP,dTDP/dTTP	MISC	Information systems
contig018002	vOTU008630	contig018002_285	K01520	dUTP pyrophosphatase [EC:3.6.1.23] [RN:R02100]	contig018002-cat_1_285	contig018002-cat_1	2	M	Pyrimidine deoxyribonuleotide biosynthesis, CDP/CTP => dCDP/dCTP,dTDP/dTTP	MISC	Information systems
contig018059	vOTU008648	contig018059_39	K01520	dUTP pyrophosphatase [EC:3.6.1.23] [RN:R02100]	contig018059-cat_1_39	contig018059-cat_1	2	MF	Pyrimidine deoxyribonuleotide biosynthesis, CDP/CTP => dCDP/dCTP,dTDP/dTTP	MISC	Information systems
contig018086	vOTU008653	contig018086_5	K01520	dUTP pyrophosphatase [EC:3.6.1.23] [RN:R02100]	contig018086-cat_2_5	contig018086-cat_2	3	MF	Pyrimidine deoxyribonuleotide biosynthesis, CDP/CTP => dCDP/dCTP,dTDP/dTTP	MISC	Information systems
contig018086	vOTU008653	contig018086_16	K00558	DNA (cytosine-5-)-methyltransferase [EC:2.1.1.37] [RN:R04858]	contig018086-cat_2_16	contig018086-cat_2	3	MF	Methionine degradation	Organic Nitrogen	Amino Acid
contig018130	vOTU008665	contig018130_8	K00558	DNA (cytosine-5-)-methyltransferase [EC:2.1.1.37] [RN:R04858]	contig018130-cat_1_8	contig018130-cat_1	2	MF	Methionine degradation	Organic Nitrogen	Amino Acid
contig018161	vOTU008673	contig018161_68	K00558	DNA (cytosine-5-)-methyltransferase [EC:2.1.1.37] [RN:R04858]	contig018161-cat_1_68	contig018161-cat_1	2	M	Methionine degradation	Organic Nitrogen	Amino Acid
contig018395	vOTU061613	contig018395_16	K00558	DNA (cytosine-5-)-methyltransferase [EC:2.1.1.37] [RN:R04858]	contig018395-cat_1_16	contig018395-cat_1	2	M	Methionine degradation	Organic Nitrogen	Amino Acid
contig018445	vOTU008729	contig018445_78	K21636	ribonucleoside-triphosphate reductase [EC:1.17.4.2 1.1.98.6] [RN:R02022 R11636]	contig018445-cat_1_78	contig018445-cat_1	1	M	Pyrimidine deoxyribonuleotide biosynthesis, CDP/CTP => dCDP/dCTP,dTDP/dTTP	MISC	Information systems
contig018445	vOTU008729	contig018445_80	K21636	ribonucleoside-triphosphate reductase [EC:1.17.4.2 1.1.98.6] [RN:R02022 R11636]	contig018445-cat_1_80	contig018445-cat_1	1	M	Pyrimidine deoxyribonuleotide biosynthesis, CDP/CTP => dCDP/dCTP,dTDP/dTTP	MISC	Information systems
contig018445	vOTU008729	contig018445_93	K01520	dUTP pyrophosphatase [EC:3.6.1.23] [RN:R02100]	contig018445-cat_1_93	contig018445-cat_1	1	M	Pyrimidine deoxyribonuleotide biosynthesis, CDP/CTP => dCDP/dCTP,dTDP/dTTP	MISC	Information systems
contig018507	vOTU008736	contig018507_51	K00558	DNA (cytosine-5-)-methyltransferase [EC:2.1.1.37] [RN:R04858]	contig018507-cat_1_51	contig018507-cat_1	2	M	Methionine degradation	Organic Nitrogen	Amino Acid
contig018507	vOTU008736	contig018507_130	K21636	ribonucleoside-triphosphate reductase [EC:1.17.4.2 1.1.98.6] [RN:R02022 R11636]	contig018507-cat_1_130	contig018507-cat_1	2	M	Pyrimidine deoxyribonuleotide biosynthesis, CDP/CTP => dCDP/dCTP,dTDP/dTTP	MISC	Information systems
contig018507	vOTU008736	contig018507_134	K01520	dUTP pyrophosphatase [EC:3.6.1.23] [RN:R02100]	contig018507-cat_1_134	contig018507-cat_1	2	M	Pyrimidine deoxyribonuleotide biosynthesis, CDP/CTP => dCDP/dCTP,dTDP/dTTP	MISC	Information systems
contig018521	vOTU008741	contig018521_68	K01520	dUTP pyrophosphatase [EC:3.6.1.23] [RN:R02100]	contig018521-cat_1_68	contig018521-cat_1	1	M	Pyrimidine deoxyribonuleotide biosynthesis, CDP/CTP => dCDP/dCTP,dTDP/dTTP	MISC	Information systems
contig018534	vOTU008744	contig018534_19	K00558	DNA (cytosine-5-)-methyltransferase [EC:2.1.1.37] [RN:R04858]	contig018534-cat_1_19	contig018534-cat_1	2	M	Methionine degradation	Organic Nitrogen	Amino Acid
contig018595	vOTU008757	contig018595_17	K00558	DNA (cytosine-5-)-methyltransferase [EC:2.1.1.37] [RN:R04858]	contig018595-cat_1_17	contig018595-cat_1	1	M	Methionine degradation	Organic Nitrogen	Amino Acid
contig018654	vOTU008778	contig018654_26	K00558	DNA (cytosine-5-)-methyltransferase [EC:2.1.1.37] [RN:R04858]	contig018654-cat_1_26	contig018654-cat_1	2	M	Methionine degradation	Organic Nitrogen	Amino Acid
contig018813	vOTU008807	contig018813_25	K00558	DNA (cytosine-5-)-methyltransferase [EC:2.1.1.37] [RN:R04858]	contig018813-cat_1_25	contig018813-cat_1	2	M	Methionine degradation	Organic Nitrogen	Amino Acid
contig018821	vOTU008810	contig018821_45	K00789	S-adenosylmethionine synthetase [EC:2.5.1.6] [RN:R00177]	contig018821-cat_1_45	contig018821-cat_1	2	M	Cysteine biosynthesis, methionine => cysteine	Organic Nitrogen	Amino Acid
contig018821	vOTU008810	contig018821_45	K00789	S-adenosylmethionine synthetase [EC:2.5.1.6] [RN:R00177]	contig018821-cat_1_45	contig018821-cat_1	2	M	Methionine degradation	Organic Nitrogen	Amino Acid
contig018821	vOTU008810	contig018821_54	K00558	DNA (cytosine-5-)-methyltransferase [EC:2.1.1.37] [RN:R04858]	contig018821-cat_1_54	contig018821-cat_1	2	M	Methionine degradation	Organic Nitrogen	Amino Acid
contig018872	vOTU008821	contig018872_43	K00558	DNA (cytosine-5-)-methyltransferase [EC:2.1.1.37] [RN:R04858]	contig018872-cat_1_43	contig018872-cat_1	1	M	Methionine degradation	Organic Nitrogen	Amino Acid
contig018944	vOTU008840	contig018944_18	K00789	S-adenosylmethionine synthetase [EC:2.5.1.6] [RN:R00177]	contig018944-cat_1_18	contig018944-cat_1	1	M	Cysteine biosynthesis, methionine => cysteine	Organic Nitrogen	Amino Acid
contig018944	vOTU008840	contig018944_18	K00789	S-adenosylmethionine synthetase [EC:2.5.1.6] [RN:R00177]	contig018944-cat_1_18	contig018944-cat_1	1	M	Methionine degradation	Organic Nitrogen	Amino Acid
contig019002	vOTU008853	contig019002_13	K00789	S-adenosylmethionine synthetase [EC:2.5.1.6] [RN:R00177]	contig019002-cat_1_13	contig019002-cat_1	2	M	Cysteine biosynthesis, methionine => cysteine	Organic Nitrogen	Amino Acid
contig019002	vOTU008853	contig019002_13	K00789	S-adenosylmethionine synthetase [EC:2.5.1.6] [RN:R00177]	contig019002-cat_1_13	contig019002-cat_1	2	M	Methionine degradation	Organic Nitrogen	Amino Acid
contig019191	vOTU061662	contig019191_23	K00558	DNA (cytosine-5-)-methyltransferase [EC:2.1.1.37] [RN:R04858]	contig019191-cat_1_23	contig019191-cat_1	2	M	Methionine degradation	Organic Nitrogen	Amino Acid
contig019191	vOTU061662	contig019191_49	K21636	ribonucleoside-triphosphate reductase [EC:1.17.4.2 1.1.98.6] [RN:R02022 R11636]	contig019191-cat_1_49	contig019191-cat_1	2	M	Pyrimidine deoxyribonuleotide biosynthesis, CDP/CTP => dCDP/dCTP,dTDP/dTTP	MISC	Information systems
contig019221	vOTU008940	contig019221_11	K01520	dUTP pyrophosphatase [EC:3.6.1.23] [RN:R02100]	contig019221-cat_1_11	contig019221-cat_1	1	M	Pyrimidine deoxyribonuleotide biosynthesis, CDP/CTP => dCDP/dCTP,dTDP/dTTP	MISC	Information systems
contig019260	vOTU008906	contig019260_53	K00558	DNA (cytosine-5-)-methyltransferase [EC:2.1.1.37] [RN:R04858]	contig019260-cat_1_53	contig019260-cat_1	1	M	Methionine degradation	Organic Nitrogen	Amino Acid
contig019387	vOTU008948	contig019387_19	K00558	DNA (cytosine-5-)-methyltransferase [EC:2.1.1.37] [RN:R04858]	contig019387-cat_1_19	contig019387-cat_1	1	M	Methionine degradation	Organic Nitrogen	Amino Acid
contig019514	vOTU008989	contig019514_92	K09882	cobS; cobaltochelatase CobS [EC:6.6.1.2]	contig019514-cat_1_92	contig019514-cat_1	1	M	Cobalamin biosynthesis, precorrin2 => cobinamide	MISC	aerobic corrin ring synthesis
contig019514	vOTU008989	contig019514_93	K09883	cobT; cobaltochelatase CobT [EC:6.6.1.2]	contig019514-cat_1_93	contig019514-cat_1	1	M	Cobalamin biosynthesis, precorrin2 => cobinamide	MISC	aerobic corrin ring synthesis
contig019554	vOTU008999	contig019554_35	K01520	dUTP pyrophosphatase [EC:3.6.1.23] [RN:R02100]	contig019554-cat_1_35	contig019554-cat_1	1	M	Pyrimidine deoxyribonuleotide biosynthesis, CDP/CTP => dCDP/dCTP,dTDP/dTTP	MISC	Information systems
contig019563	vOTU009001	contig019563_127	K09883	cobT; cobaltochelatase CobT [EC:6.6.1.2]	contig019563-cat_1_127	contig019563-cat_1	2	MF	Cobalamin biosynthesis, precorrin2 => cobinamide	MISC	aerobic corrin ring synthesis
contig019563	vOTU009001	contig019563_128	K09882	cobS; cobaltochelatase CobS [EC:6.6.1.2]	contig019563-cat_1_128	contig019563-cat_1	2	MF	Cobalamin biosynthesis, precorrin2 => cobinamide	MISC	aerobic corrin ring synthesis
contig019700	vOTU009020	contig019700_5	K21636	ribonucleoside-triphosphate reductase [EC:1.17.4.2 1.1.98.6] [RN:R02022 R11636]	contig019700-cat_1_5	contig019700-cat_1	2	MF	Pyrimidine deoxyribonuleotide biosynthesis, CDP/CTP => dCDP/dCTP,dTDP/dTTP	MISC	Information systems
contig019700	vOTU009020	contig019700_134	K01520	dUTP pyrophosphatase [EC:3.6.1.23] [RN:R02100]	contig019700-cat_1_134	contig019700-cat_1	2	M	Pyrimidine deoxyribonuleotide biosynthesis, CDP/CTP => dCDP/dCTP,dTDP/dTTP	MISC	Information systems
contig019821	vOTU009053	contig019821_30	K01520	dUTP pyrophosphatase [EC:3.6.1.23] [RN:R02100]	contig019821-cat_1_30	contig019821-cat_1	2	M	Pyrimidine deoxyribonuleotide biosynthesis, CDP/CTP => dCDP/dCTP,dTDP/dTTP	MISC	Information systems
contig019851	vOTU009214	contig019851_23	K01520	dUTP pyrophosphatase [EC:3.6.1.23] [RN:R02100]	contig019851-cat_1_23	contig019851-cat_1	1	M	Pyrimidine deoxyribonuleotide biosynthesis, CDP/CTP => dCDP/dCTP,dTDP/dTTP	MISC	Information systems
contig019856	vOTU009060	contig019856_17	K01520	dUTP pyrophosphatase [EC:3.6.1.23] [RN:R02100]	contig019856-cat_1_17	contig019856-cat_1	1	M	Pyrimidine deoxyribonuleotide biosynthesis, CDP/CTP => dCDP/dCTP,dTDP/dTTP	MISC	Information systems
contig019856	vOTU009060	contig019856_19	K21636	ribonucleoside-triphosphate reductase [EC:1.17.4.2 1.1.98.6] [RN:R02022 R11636]	contig019856-cat_1_19	contig019856-cat_1	1	M	Pyrimidine deoxyribonuleotide biosynthesis, CDP/CTP => dCDP/dCTP,dTDP/dTTP	MISC	Information systems
contig019871	vOTU009850	contig019871_60	K01520	dUTP pyrophosphatase [EC:3.6.1.23] [RN:R02100]	contig019871-cat_1_60	contig019871-cat_1	2	M	Pyrimidine deoxyribonuleotide biosynthesis, CDP/CTP => dCDP/dCTP,dTDP/dTTP	MISC	Information systems
contig019871	vOTU009850	contig019871_67	K21636	ribonucleoside-triphosphate reductase [EC:1.17.4.2 1.1.98.6] [RN:R02022 R11636]	contig019871-cat_1_67	contig019871-cat_1	2	M	Pyrimidine deoxyribonuleotide biosynthesis, CDP/CTP => dCDP/dCTP,dTDP/dTTP	MISC	Information systems
contig019871	vOTU009850	contig019871_123	K01939	adenylosuccinate synthase [EC:6.3.4.4] [RN:R01135]	contig019871-cat_1_123	contig019871-cat_1	2	M	Adenine ribonucleotide biosynthesis, IMP => ADP,ATP	MISC	Information systems
contig019880	vOTU097939	contig019880_12	K00558	DNA (cytosine-5-)-methyltransferase [EC:2.1.1.37] [RN:R04858]	contig019880-cat_1_12	contig019880-cat_1	1	MF	Methionine degradation	Organic Nitrogen	Amino Acid
contig019887	vOTU061897	contig019887_12	K21636	ribonucleoside-triphosphate reductase [EC:1.17.4.2 1.1.98.6] [RN:R02022 R11636]	contig019887-cat_1_12	contig019887-cat_1	2	M	Pyrimidine deoxyribonuleotide biosynthesis, CDP/CTP => dCDP/dCTP,dTDP/dTTP	MISC	Information systems
contig019937	vOTU009071	contig019937_20	K01491	methylenetetrahydrofolate dehydrogenase (NADP+) / methenyltetrahydrofolate cyclohydrolase [EC:1.5.1.5 3.5.4.9] [RN:R01655 R01220]	contig019937-cat_1_20	contig019937-cat_1	2	M	Reductive acetyl-CoA pathway (Wood-Ljungdahl pathway)	Energy	C1
contig019952	vOTU009075	contig019952_129	K01520	dUTP pyrophosphatase [EC:3.6.1.23] [RN:R02100]	contig019952-cat_1_129	contig019952-cat_1	1	M	Pyrimidine deoxyribonuleotide biosynthesis, CDP/CTP => dCDP/dCTP,dTDP/dTTP	MISC	Information systems
contig019963	vOTU009077	contig019963_6	K01520	dUTP pyrophosphatase [EC:3.6.1.23] [RN:R02100]	contig019963-cat_2_6	contig019963-cat_2	3	MF	Pyrimidine deoxyribonuleotide biosynthesis, CDP/CTP => dCDP/dCTP,dTDP/dTTP	MISC	Information systems
contig019973	vOTU009079	contig019973_83	K21636	ribonucleoside-triphosphate reductase [EC:1.17.4.2 1.1.98.6] [RN:R02022 R11636]	contig019973-cat_1_83	contig019973-cat_1	1	M	Pyrimidine deoxyribonuleotide biosynthesis, CDP/CTP => dCDP/dCTP,dTDP/dTTP	MISC	Information systems
contig019973	vOTU009079	contig019973_86	K01520	dUTP pyrophosphatase [EC:3.6.1.23] [RN:R02100]	contig019973-cat_1_86	contig019973-cat_1	1	M	Pyrimidine deoxyribonuleotide biosynthesis, CDP/CTP => dCDP/dCTP,dTDP/dTTP	MISC	Information systems
contig020003	vOTU009088	contig020003_59	K00558	DNA (cytosine-5-)-methyltransferase [EC:2.1.1.37] [RN:R04858]	contig020003-cat_1_59	contig020003-cat_1	1	M	Methionine degradation	Organic Nitrogen	Amino Acid
contig020035	vOTU009092	contig020035_43	K01494	dCTP deaminase [EC:3.5.4.13] [RN:R02325]	contig020035-cat_1_43	contig020035-cat_1	2	M	Pyrimidine deoxyribonuleotide biosynthesis, CDP/CTP => dCDP/dCTP,dTDP/dTTP	MISC	Information systems
contig020035	vOTU009092	contig020035_74	K21636	ribonucleoside-triphosphate reductase [EC:1.17.4.2 1.1.98.6] [RN:R02022 R11636]	contig020035-cat_1_74	contig020035-cat_1	2	M	Pyrimidine deoxyribonuleotide biosynthesis, CDP/CTP => dCDP/dCTP,dTDP/dTTP	MISC	Information systems
contig020035	vOTU009092	contig020035_75	K21636	ribonucleoside-triphosphate reductase [EC:1.17.4.2 1.1.98.6] [RN:R02022 R11636]	contig020035-cat_1_75	contig020035-cat_1	2	M	Pyrimidine deoxyribonuleotide biosynthesis, CDP/CTP => dCDP/dCTP,dTDP/dTTP	MISC	Information systems
contig020035	vOTU009092	contig020035_84	K04069	pyruvate formate lyase activating enzyme	contig020035-cat_1_84	contig020035-cat_1	2	M	pyruvate metabolism	carbon utilization	pyruvate metabolism
contig020035	vOTU009092	contig020035_135	K00937	polyphosphate kinase ???	contig020035-cat_1_135	contig020035-cat_1	1	M	Cytochrome d ubiquinol oxidase	Energy	Oxygen
contig020041	vOTU009093	contig020041_15	K00558	DNA (cytosine-5-)-methyltransferase [EC:2.1.1.37] [RN:R04858]	contig020041-cat_1_15	contig020041-cat_1	2	MF	Methionine degradation	Organic Nitrogen	Amino Acid
contig020126	vOTU009429	contig020126_45	K00789	S-adenosylmethionine synthetase [EC:2.5.1.6] [RN:R00177]	contig020126-cat_1_45	contig020126-cat_1	2	M	Cysteine biosynthesis, methionine => cysteine	Organic Nitrogen	Amino Acid
contig020126	vOTU009429	contig020126_45	K00789	S-adenosylmethionine synthetase [EC:2.5.1.6] [RN:R00177]	contig020126-cat_1_45	contig020126-cat_1	2	M	Methionine degradation	Organic Nitrogen	Amino Acid
contig020128	vOTU009195	contig020128_43	K00558	DNA (cytosine-5-)-methyltransferase [EC:2.1.1.37] [RN:R04858]	contig020128-cat_1_43	contig020128-cat_1	1	M	Methionine degradation	Organic Nitrogen	Amino Acid
contig020130	vOTU009520	contig020130_31	K00789	S-adenosylmethionine synthetase [EC:2.5.1.6] [RN:R00177]	contig020130-cat_1_31	contig020130-cat_1	2	M	Cysteine biosynthesis, methionine => cysteine	Organic Nitrogen	Amino Acid
contig020130	vOTU009520	contig020130_31	K00789	S-adenosylmethionine synthetase [EC:2.5.1.6] [RN:R00177]	contig020130-cat_1_31	contig020130-cat_1	2	M	Methionine degradation	Organic Nitrogen	Amino Acid
contig020130	vOTU009520	contig020130_62	K01243	S-adenosylhomocysteine/5'-methylthioadenosine nucleosidase [EC:3.2.2.9] [RN:R00194]	contig020130-cat_1_62	contig020130-cat_1	1	M	Cysteine biosynthesis, methionine => cysteine	Organic Nitrogen	Amino Acid
contig020133	vOTU009105	contig020133_21	K00789	S-adenosylmethionine synthetase [EC:2.5.1.6] [RN:R00177]	contig020133-cat_1_21	contig020133-cat_1	2	M	Cysteine biosynthesis, methionine => cysteine	Organic Nitrogen	Amino Acid
contig020133	vOTU009105	contig020133_21	K00789	S-adenosylmethionine synthetase [EC:2.5.1.6] [RN:R00177]	contig020133-cat_1_21	contig020133-cat_1	2	M	Methionine degradation	Organic Nitrogen	Amino Acid
contig020142	vOTU030757	contig020142_133	K01520	dUTP pyrophosphatase [EC:3.6.1.23] [RN:R02100]	contig020142-cat_1_133	contig020142-cat_1	1	M	Pyrimidine deoxyribonuleotide biosynthesis, CDP/CTP => dCDP/dCTP,dTDP/dTTP	MISC	Information systems
contig020180	vOTU009114	contig020180_11	K00558	DNA (cytosine-5-)-methyltransferase [EC:2.1.1.37] [RN:R04858]	contig020180-cat_1_11	contig020180-cat_1	2	MF	Methionine degradation	Organic Nitrogen	Amino Acid
contig020210	vOTU009124	contig020210_27	K21636	ribonucleoside-triphosphate reductase [EC:1.17.4.2 1.1.98.6] [RN:R02022 R11636]	contig020210-cat_1_27	contig020210-cat_1	2	M	Pyrimidine deoxyribonuleotide biosynthesis, CDP/CTP => dCDP/dCTP,dTDP/dTTP	MISC	Information systems
contig020217	vOTU009973	contig020217_17	K01520	dUTP pyrophosphatase [EC:3.6.1.23] [RN:R02100]	contig020217-cat_1_17	contig020217-cat_1	2	M	Pyrimidine deoxyribonuleotide biosynthesis, CDP/CTP => dCDP/dCTP,dTDP/dTTP	MISC	Information systems
contig020250	vOTU009137	contig020250_17	K00560	thymidylate synthase [EC:2.1.1.45] [RN:R02101]	contig020250-cat_1_17	contig020250-cat_1	2	M	Pyrimidine deoxyribonuleotide biosynthesis, CDP/CTP => dCDP/dCTP,dTDP/dTTP	MISC	Information systems
contig020250	vOTU009137	contig020250_21	K01520	dUTP pyrophosphatase [EC:3.6.1.23] [RN:R02100]	contig020250-cat_1_21	contig020250-cat_1	2	M	Pyrimidine deoxyribonuleotide biosynthesis, CDP/CTP => dCDP/dCTP,dTDP/dTTP	MISC	Information systems
contig020251	vOTU009138	contig020251_12	K00789	S-adenosylmethionine synthetase [EC:2.5.1.6] [RN:R00177]	contig020251-cat_1_12	contig020251-cat_1	1	M	Cysteine biosynthesis, methionine => cysteine	Organic Nitrogen	Amino Acid
contig020251	vOTU009138	contig020251_12	K00789	S-adenosylmethionine synthetase [EC:2.5.1.6] [RN:R00177]	contig020251-cat_1_12	contig020251-cat_1	1	M	Methionine degradation	Organic Nitrogen	Amino Acid
contig020251	vOTU009138	contig020251_74	GT2	GT2 cellulose synthase (EC 2.4.1.12); chitin synthase (EC 2.4.1.16); dolichyl-phosphate beta-D-mannosyltransferase (EC 2.4.1.83); dolichyl-phosphate beta-glucosyltransferase (EC 2.4.1.117); N-acetylglucosaminyltransferase (EC 2.4.1.-); N-acetylgalactosaminyltransferase (EC 2.4.1.-); hyaluronan synthase (EC 2.4.1.212); chitin oligosaccharide synthase (EC 2.4.1.-); beta-1,3-glucan synthase (EC 2.4.…	contig020251-cat_1_74	contig020251-cat_1	2	MF	GlycosylTransferases	carbon utilization	CAZY
contig020290	vOTU113214	contig020290_57	K01520	dUTP pyrophosphatase [EC:3.6.1.23] [RN:R02100]	contig020290-cat_1_57	contig020290-cat_1	1	M	Pyrimidine deoxyribonuleotide biosynthesis, CDP/CTP => dCDP/dCTP,dTDP/dTTP	MISC	Information systems
contig020290	vOTU113214	contig020290_63	K21636	ribonucleoside-triphosphate reductase [EC:1.17.4.2 1.1.98.6] [RN:R02022 R11636]	contig020290-cat_1_63	contig020290-cat_1	1	M	Pyrimidine deoxyribonuleotide biosynthesis, CDP/CTP => dCDP/dCTP,dTDP/dTTP	MISC	Information systems
contig020300	vOTU061764	contig020300_21	K00558	DNA (cytosine-5-)-methyltransferase [EC:2.1.1.37] [RN:R04858]	contig020300-cat_1_21	contig020300-cat_1	1	M	Methionine degradation	Organic Nitrogen	Amino Acid
contig020408	vOTU009170	contig020408_11	K01520	dUTP pyrophosphatase [EC:3.6.1.23] [RN:R02100]	contig020408-cat_1_11	contig020408-cat_1	2	M	Pyrimidine deoxyribonuleotide biosynthesis, CDP/CTP => dCDP/dCTP,dTDP/dTTP	MISC	Information systems
contig020408	vOTU009170	contig020408_16	K21636	ribonucleoside-triphosphate reductase [EC:1.17.4.2 1.1.98.6] [RN:R02022 R11636]	contig020408-cat_1_16	contig020408-cat_1	2	M	Pyrimidine deoxyribonuleotide biosynthesis, CDP/CTP => dCDP/dCTP,dTDP/dTTP	MISC	Information systems
contig020408	vOTU009170	contig020408_74	GT2	GT2 cellulose synthase (EC 2.4.1.12); chitin synthase (EC 2.4.1.16); dolichyl-phosphate beta-D-mannosyltransferase (EC 2.4.1.83); dolichyl-phosphate beta-glucosyltransferase (EC 2.4.1.117); N-acetylglucosaminyltransferase (EC 2.4.1.-); N-acetylgalactosaminyltransferase (EC 2.4.1.-); hyaluronan synthase (EC 2.4.1.212); chitin oligosaccharide synthase (EC 2.4.1.-); beta-1,3-glucan synthase (EC 2.4.…	contig020408-cat_1_74	contig020408-cat_1	1	M	GlycosylTransferases	carbon utilization	CAZY
contig020721	vOTU009202	contig020721_46	K01520	dUTP pyrophosphatase [EC:3.6.1.23] [RN:R02100]	contig020721-cat_1_46	contig020721-cat_1	1	M	Pyrimidine deoxyribonuleotide biosynthesis, CDP/CTP => dCDP/dCTP,dTDP/dTTP	MISC	Information systems
contig020721	vOTU009202	contig020721_49	K21636	ribonucleoside-triphosphate reductase [EC:1.17.4.2 1.1.98.6] [RN:R02022 R11636]	contig020721-cat_1_49	contig020721-cat_1	1	M	Pyrimidine deoxyribonuleotide biosynthesis, CDP/CTP => dCDP/dCTP,dTDP/dTTP	MISC	Information systems
contig020721	vOTU009202	contig020721_86	K01939	adenylosuccinate synthase [EC:6.3.4.4] [RN:R01135]	contig020721-cat_1_86	contig020721-cat_1	2	M	Adenine ribonucleotide biosynthesis, IMP => ADP,ATP	MISC	Information systems
contig020920	vOTU009203	contig020920_11	K00558	DNA (cytosine-5-)-methyltransferase [EC:2.1.1.37] [RN:R04858]	contig020920-cat_2_11	contig020920-cat_2	3	M	Methionine degradation	Organic Nitrogen	Amino Acid
contig021019	vOTU009229	contig021019_8	K00560	thymidylate synthase [EC:2.1.1.45] [RN:R02101]	contig021019-cat_2_8	contig021019-cat_2	3	M	Pyrimidine deoxyribonuleotide biosynthesis, CDP/CTP => dCDP/dCTP,dTDP/dTTP	MISC	Information systems
contig021178	vOTU028770	contig021178_24	K00789	S-adenosylmethionine synthetase [EC:2.5.1.6] [RN:R00177]	contig021178-cat_1_24	contig021178-cat_1	2	M	Cysteine biosynthesis, methionine => cysteine	Organic Nitrogen	Amino Acid
contig021178	vOTU028770	contig021178_24	K00789	S-adenosylmethionine synthetase [EC:2.5.1.6] [RN:R00177]	contig021178-cat_1_24	contig021178-cat_1	2	M	Methionine degradation	Organic Nitrogen	Amino Acid
contig021178	vOTU028770	contig021178_26	K00558	DNA (cytosine-5-)-methyltransferase [EC:2.1.1.37] [RN:R04858]	contig021178-cat_1_26	contig021178-cat_1	2	M	Methionine degradation	Organic Nitrogen	Amino Acid
contig021185	vOTU009246	contig021185_36	K01494	dCTP deaminase [EC:3.5.4.13] [RN:R02325]	contig021185-cat_1_36	contig021185-cat_1	2	M	Pyrimidine deoxyribonuleotide biosynthesis, CDP/CTP => dCDP/dCTP,dTDP/dTTP	MISC	Information systems
contig021556	vOTU009301	contig021556_33	K01520	dUTP pyrophosphatase [EC:3.6.1.23] [RN:R02100]	contig021556-cat_1_33	contig021556-cat_1	2	M	Pyrimidine deoxyribonuleotide biosynthesis, CDP/CTP => dCDP/dCTP,dTDP/dTTP	MISC	Information systems
contig021575	vOTU009305	contig021575_43	K00789	S-adenosylmethionine synthetase [EC:2.5.1.6] [RN:R00177]	contig021575-cat_1_43	contig021575-cat_1	1	M	Cysteine biosynthesis, methionine => cysteine	Organic Nitrogen	Amino Acid
contig021575	vOTU009305	contig021575_43	K00789	S-adenosylmethionine synthetase [EC:2.5.1.6] [RN:R00177]	contig021575-cat_1_43	contig021575-cat_1	1	M	Methionine degradation	Organic Nitrogen	Amino Acid
contig021819	vOTU009348	contig021819_24	K01939	adenylosuccinate synthase [EC:6.3.4.4] [RN:R01135]	contig021819-cat_1_24	contig021819-cat_1	2	M	Adenine ribonucleotide biosynthesis, IMP => ADP,ATP	MISC	Information systems
contig021819	vOTU009348	contig021819_173	K01520	dUTP pyrophosphatase [EC:3.6.1.23] [RN:R02100]	contig021819-cat_1_173	contig021819-cat_1	1	M	Pyrimidine deoxyribonuleotide biosynthesis, CDP/CTP => dCDP/dCTP,dTDP/dTTP	MISC	Information systems
contig021819	vOTU009348	contig021819_175	K00525	ribonucleoside-diphosphate reductase [EC:1.17.4.1] [RN:R02024]	contig021819-cat_1_175	contig021819-cat_1	1	MKE	Pyrimidine deoxyribonuleotide biosynthesis, CDP/CTP => dCDP/dCTP,dTDP/dTTP	MISC	Information systems
contig021823	vOTU009355	contig021823_30	K00558	DNA (cytosine-5-)-methyltransferase [EC:2.1.1.37] [RN:R04858]	contig021823-cat_1_30	contig021823-cat_1	1	M	Methionine degradation	Organic Nitrogen	Amino Acid
contig022033	vOTU009380	contig022033_72	K01520	dUTP pyrophosphatase [EC:3.6.1.23] [RN:R02100]	contig022033-cat_1_72	contig022033-cat_1	2	M	Pyrimidine deoxyribonuleotide biosynthesis, CDP/CTP => dCDP/dCTP,dTDP/dTTP	MISC	Information systems
contig022037	vOTU009381	contig022037_23	K00558	DNA (cytosine-5-)-methyltransferase [EC:2.1.1.37] [RN:R04858]	contig022037-cat_1_23	contig022037-cat_1	2	M	Methionine degradation	Organic Nitrogen	Amino Acid
contig022146	vOTU009397	contig022146_32	K00558	DNA (cytosine-5-)-methyltransferase [EC:2.1.1.37] [RN:R04858]	contig022146-cat_1_32	contig022146-cat_1	2	MF	Methionine degradation	Organic Nitrogen	Amino Acid
contig022248	vOTU009414	contig022248_56	K21636	ribonucleoside-triphosphate reductase [EC:1.17.4.2 1.1.98.6] [RN:R02022 R11636]	contig022248-cat_1_56	contig022248-cat_1	1	M	Pyrimidine deoxyribonuleotide biosynthesis, CDP/CTP => dCDP/dCTP,dTDP/dTTP	MISC	Information systems
contig022248	vOTU009414	contig022248_67	K01520	dUTP pyrophosphatase [EC:3.6.1.23] [RN:R02100]	contig022248-cat_1_67	contig022248-cat_1	1	M	Pyrimidine deoxyribonuleotide biosynthesis, CDP/CTP => dCDP/dCTP,dTDP/dTTP	MISC	Information systems
contig022309	vOTU009423	contig022309_11	K00558	DNA (cytosine-5-)-methyltransferase [EC:2.1.1.37] [RN:R04858]	contig022309-cat_1_11	contig022309-cat_1	2	MF	Methionine degradation	Organic Nitrogen	Amino Acid
contig022404	vOTU010087	contig022404_15	K00789	S-adenosylmethionine synthetase [EC:2.5.1.6] [RN:R00177]	contig022404-cat_1_15	contig022404-cat_1	2	M	Cysteine biosynthesis, methionine => cysteine	Organic Nitrogen	Amino Acid
contig022404	vOTU010087	contig022404_15	K00789	S-adenosylmethionine synthetase [EC:2.5.1.6] [RN:R00177]	contig022404-cat_1_15	contig022404-cat_1	2	M	Methionine degradation	Organic Nitrogen	Amino Acid
contig022404	vOTU010087	contig022404_16	K00789	S-adenosylmethionine synthetase [EC:2.5.1.6] [RN:R00177]	contig022404-cat_1_16	contig022404-cat_1	2	M	Cysteine biosynthesis, methionine => cysteine	Organic Nitrogen	Amino Acid
contig022404	vOTU010087	contig022404_16	K00789	S-adenosylmethionine synthetase [EC:2.5.1.6] [RN:R00177]	contig022404-cat_1_16	contig022404-cat_1	2	M	Methionine degradation	Organic Nitrogen	Amino Acid
contig022405	vOTU009443	contig022405_10	K00558	DNA (cytosine-5-)-methyltransferase [EC:2.1.1.37] [RN:R04858]	contig022405-cat_1_10	contig022405-cat_1	2	MF	Methionine degradation	Organic Nitrogen	Amino Acid
contig022639	vOTU009480	contig022639_11	K00558	DNA (cytosine-5-)-methyltransferase [EC:2.1.1.37] [RN:R04858]	contig022639-cat_2_11	contig022639-cat_2	3	MF	Methionine degradation	Organic Nitrogen	Amino Acid
contig022707	vOTU009494	contig022707_17	K00558	DNA (cytosine-5-)-methyltransferase [EC:2.1.1.37] [RN:R04858]	contig022707-cat_1_17	contig022707-cat_1	2	M	Methionine degradation	Organic Nitrogen	Amino Acid
contig022738	vOTU009499	contig022738_6	K01520	dUTP pyrophosphatase [EC:3.6.1.23] [RN:R02100]	contig022738-cat_1_6	contig022738-cat_1	2	MF	Pyrimidine deoxyribonuleotide biosynthesis, CDP/CTP => dCDP/dCTP,dTDP/dTTP	MISC	Information systems
contig022738	vOTU009499	contig022738_58	K00525	ribonucleoside-diphosphate reductase [EC:1.17.4.1] [RN:R02024]	contig022738-cat_1_58	contig022738-cat_1	1	MKE	Pyrimidine deoxyribonuleotide biosynthesis, CDP/CTP => dCDP/dCTP,dTDP/dTTP	MISC	Information systems
contig022891	vOTU009525	contig022891_21	K00558	DNA (cytosine-5-)-methyltransferase [EC:2.1.1.37] [RN:R04858]	contig022891-cat_1_21	contig022891-cat_1	1	M	Methionine degradation	Organic Nitrogen	Amino Acid
contig022946	vOTU061877	contig022946_51	K00558	DNA (cytosine-5-)-methyltransferase [EC:2.1.1.37] [RN:R04858]	contig022946-cat_1_51	contig022946-cat_1	2	MF	Methionine degradation	Organic Nitrogen	Amino Acid
contig023159	vOTU009559	contig023159_40	K01520	dUTP pyrophosphatase [EC:3.6.1.23] [RN:R02100]	contig023159-cat_1_40	contig023159-cat_1	2	M	Pyrimidine deoxyribonuleotide biosynthesis, CDP/CTP => dCDP/dCTP,dTDP/dTTP	MISC	Information systems
contig023202	vOTU009563	contig023202_25	K00558	DNA (cytosine-5-)-methyltransferase [EC:2.1.1.37] [RN:R04858]	contig023202-cat_1_25	contig023202-cat_1	2	M	Methionine degradation	Organic Nitrogen	Amino Acid
contig023202	vOTU009563	contig023202_30	K01520	dUTP pyrophosphatase [EC:3.6.1.23] [RN:R02100]	contig023202-cat_1_30	contig023202-cat_1	2	M	Pyrimidine deoxyribonuleotide biosynthesis, CDP/CTP => dCDP/dCTP,dTDP/dTTP	MISC	Information systems
contig024057	vOTU009680	contig024057_34	K09883	cobT; cobaltochelatase CobT [EC:6.6.1.2]	contig024057-cat_1_34	contig024057-cat_1	1	M	Cobalamin biosynthesis, precorrin2 => cobinamide	MISC	aerobic corrin ring synthesis
contig024057	vOTU009680	contig024057_35	K09882	cobS; cobaltochelatase CobS [EC:6.6.1.2]	contig024057-cat_1_35	contig024057-cat_1	1	M	Cobalamin biosynthesis, precorrin2 => cobinamide	MISC	aerobic corrin ring synthesis
contig024057	vOTU009680	contig024057_57	K00525	ribonucleoside-diphosphate reductase [EC:1.17.4.1] [RN:R02024]	contig024057-cat_1_57	contig024057-cat_1	1	MKE	Pyrimidine deoxyribonuleotide biosynthesis, CDP/CTP => dCDP/dCTP,dTDP/dTTP	MISC	Information systems
contig024111	vOTU009685	contig024111_5	C56	Catlytic type: Cysteine; acts only on peptides of less than 20 amino acids; a preference for bulky, hydrophobic P1 residues	contig024111-cat_1_5	contig024111-cat_1	1	MF	PfpI endopeptidase of {Pyrococcus furiosus}	Organic Nitrogen	Peptidase
contig024198	vOTU009704	contig024198_43	K01520	dUTP pyrophosphatase [EC:3.6.1.23] [RN:R02100]	contig024198-cat_1_43	contig024198-cat_1	1	M	Pyrimidine deoxyribonuleotide biosynthesis, CDP/CTP => dCDP/dCTP,dTDP/dTTP	MISC	Information systems
contig024198	vOTU009704	contig024198_46	K21636	ribonucleoside-triphosphate reductase [EC:1.17.4.2 1.1.98.6] [RN:R02022 R11636]	contig024198-cat_1_46	contig024198-cat_1	1	M	Pyrimidine deoxyribonuleotide biosynthesis, CDP/CTP => dCDP/dCTP,dTDP/dTTP	MISC	Information systems
contig024198	vOTU009704	contig024198_83	K01939	adenylosuccinate synthase [EC:6.3.4.4] [RN:R01135]	contig024198-cat_1_83	contig024198-cat_1	1	M	Adenine ribonucleotide biosynthesis, IMP => ADP,ATP	MISC	Information systems
contig024209	vOTU009707	contig024209_13	K00789	S-adenosylmethionine synthetase [EC:2.5.1.6] [RN:R00177]	contig024209-cat_1_13	contig024209-cat_1	2	M	Cysteine biosynthesis, methionine => cysteine	Organic Nitrogen	Amino Acid
contig024209	vOTU009707	contig024209_13	K00789	S-adenosylmethionine synthetase [EC:2.5.1.6] [RN:R00177]	contig024209-cat_1_13	contig024209-cat_1	2	M	Methionine degradation	Organic Nitrogen	Amino Acid
contig024209	vOTU009707	contig024209_17	K00558	DNA (cytosine-5-)-methyltransferase [EC:2.1.1.37] [RN:R04858]	contig024209-cat_1_17	contig024209-cat_1	2	M	Methionine degradation	Organic Nitrogen	Amino Acid
contig024212	vOTU009708	contig024212_24	K01520	dUTP pyrophosphatase [EC:3.6.1.23] [RN:R02100]	contig024212-cat_1_24	contig024212-cat_1	2	M	Pyrimidine deoxyribonuleotide biosynthesis, CDP/CTP => dCDP/dCTP,dTDP/dTTP	MISC	Information systems
contig024342	vOTU009732	contig024342_24	K00789	S-adenosylmethionine synthetase [EC:2.5.1.6] [RN:R00177]	contig024342-cat_1_24	contig024342-cat_1	1	M	Cysteine biosynthesis, methionine => cysteine	Organic Nitrogen	Amino Acid
contig024342	vOTU009732	contig024342_24	K00789	S-adenosylmethionine synthetase [EC:2.5.1.6] [RN:R00177]	contig024342-cat_1_24	contig024342-cat_1	1	M	Methionine degradation	Organic Nitrogen	Amino Acid
contig024471	vOTU009773	contig024471_3	K00558	DNA (cytosine-5-)-methyltransferase [EC:2.1.1.37] [RN:R04858]	contig024471-cat_1_3	contig024471-cat_1	2	MF	Methionine degradation	Organic Nitrogen	Amino Acid
contig024471	vOTU009773	contig024471_24	K00789	S-adenosylmethionine synthetase [EC:2.5.1.6] [RN:R00177]	contig024471-cat_1_24	contig024471-cat_1	2	M	Cysteine biosynthesis, methionine => cysteine	Organic Nitrogen	Amino Acid
contig024471	vOTU009773	contig024471_24	K00789	S-adenosylmethionine synthetase [EC:2.5.1.6] [RN:R00177]	contig024471-cat_1_24	contig024471-cat_1	2	M	Methionine degradation	Organic Nitrogen	Amino Acid
contig024471	vOTU009773	contig024471_26	K00558	DNA (cytosine-5-)-methyltransferase [EC:2.1.1.37] [RN:R04858]	contig024471-cat_1_26	contig024471-cat_1	2	MF	Methionine degradation	Organic Nitrogen	Amino Acid
contig024676	vOTU125990	contig024676_25	K01520	dUTP pyrophosphatase [EC:3.6.1.23] [RN:R02100]	contig024676-cat_1_25	contig024676-cat_1	1	M	Pyrimidine deoxyribonuleotide biosynthesis, CDP/CTP => dCDP/dCTP,dTDP/dTTP	MISC	Information systems
contig024680	vOTU009813	contig024680_216	K01520	dUTP pyrophosphatase [EC:3.6.1.23] [RN:R02100]	contig024680-cat_1_216	contig024680-cat_1	1	M	Pyrimidine deoxyribonuleotide biosynthesis, CDP/CTP => dCDP/dCTP,dTDP/dTTP	MISC	Information systems
contig024680	vOTU009813	contig024680_219	K21636	ribonucleoside-triphosphate reductase [EC:1.17.4.2 1.1.98.6] [RN:R02022 R11636]	contig024680-cat_1_219	contig024680-cat_1	1	M	Pyrimidine deoxyribonuleotide biosynthesis, CDP/CTP => dCDP/dCTP,dTDP/dTTP	MISC	Information systems
contig024680	vOTU009813	contig024680_220	K21636	ribonucleoside-triphosphate reductase [EC:1.17.4.2 1.1.98.6] [RN:R02022 R11636]	contig024680-cat_1_220	contig024680-cat_1	1	M	Pyrimidine deoxyribonuleotide biosynthesis, CDP/CTP => dCDP/dCTP,dTDP/dTTP	MISC	Information systems
contig024680	vOTU009813	contig024680_265	M26	Catlytic type: Metallo; cleaves the heavy chain of human IgA1 at the Pro227-Thr228 bond; tightly associated with the bacterial cell surface	contig024680-cat_1_265	contig024680-cat_1	1	M	Endopeptidases	Organic Nitrogen	Peptidase
contig024700	vOTU009819	contig024700_25	K00558	DNA (cytosine-5-)-methyltransferase [EC:2.1.1.37] [RN:R04858]	contig024700-cat_1_25	contig024700-cat_1	1	M	Methionine degradation	Organic Nitrogen	Amino Acid
contig024700	vOTU009819	contig024700_27	K00789	S-adenosylmethionine synthetase [EC:2.5.1.6] [RN:R00177]	contig024700-cat_1_27	contig024700-cat_1	1	M	Cysteine biosynthesis, methionine => cysteine	Organic Nitrogen	Amino Acid
contig024700	vOTU009819	contig024700_27	K00789	S-adenosylmethionine synthetase [EC:2.5.1.6] [RN:R00177]	contig024700-cat_1_27	contig024700-cat_1	1	M	Methionine degradation	Organic Nitrogen	Amino Acid
contig024845	vOTU009856	contig024845_5	K01520	dUTP pyrophosphatase [EC:3.6.1.23] [RN:R02100]	contig024845-cat_2_5	contig024845-cat_2	3	MF	Pyrimidine deoxyribonuleotide biosynthesis, CDP/CTP => dCDP/dCTP,dTDP/dTTP	MISC	Information systems
contig024845	vOTU009856	contig024845_9	K21636	ribonucleoside-triphosphate reductase [EC:1.17.4.2 1.1.98.6] [RN:R02022 R11636]	contig024845-cat_2_9	contig024845-cat_2	3	MF	Pyrimidine deoxyribonuleotide biosynthesis, CDP/CTP => dCDP/dCTP,dTDP/dTTP	MISC	Information systems
contig024893	vOTU009866	contig024893_18	K01520	dUTP pyrophosphatase [EC:3.6.1.23] [RN:R02100]	contig024893-cat_1_18	contig024893-cat_1	2	M	Pyrimidine deoxyribonuleotide biosynthesis, CDP/CTP => dCDP/dCTP,dTDP/dTTP	MISC	Information systems
contig024893	vOTU009866	contig024893_23	K21636	ribonucleoside-triphosphate reductase [EC:1.17.4.2 1.1.98.6] [RN:R02022 R11636]	contig024893-cat_1_23	contig024893-cat_1	2	M	Pyrimidine deoxyribonuleotide biosynthesis, CDP/CTP => dCDP/dCTP,dTDP/dTTP	MISC	Information systems
contig024902	vOTU009923	contig024902_42	K00558	DNA (cytosine-5-)-methyltransferase [EC:2.1.1.37] [RN:R04858]	contig024902-cat_1_42	contig024902-cat_1	2	M	Methionine degradation	Organic Nitrogen	Amino Acid
contig024902	vOTU009923	contig024902_89	K01520	dUTP pyrophosphatase [EC:3.6.1.23] [RN:R02100]	contig024902-cat_1_89	contig024902-cat_1	2	M	Pyrimidine deoxyribonuleotide biosynthesis, CDP/CTP => dCDP/dCTP,dTDP/dTTP	MISC	Information systems
contig024902	vOTU009923	contig024902_125	K21636	ribonucleoside-triphosphate reductase [EC:1.17.4.2 1.1.98.6] [RN:R02022 R11636]	contig024902-cat_1_125	contig024902-cat_1	1	M	Pyrimidine deoxyribonuleotide biosynthesis, CDP/CTP => dCDP/dCTP,dTDP/dTTP	MISC	Information systems
contig024938	vOTU009875	contig024938_9	K00558	DNA (cytosine-5-)-methyltransferase [EC:2.1.1.37] [RN:R04858]	contig024938-cat_1_9	contig024938-cat_1	2	M	Methionine degradation	Organic Nitrogen	Amino Acid
contig025100	vOTU009894	contig025100_30	K00560	thymidylate synthase [EC:2.1.1.45] [RN:R02101]	contig025100-cat_1_30	contig025100-cat_1	1	M	Pyrimidine deoxyribonuleotide biosynthesis, CDP/CTP => dCDP/dCTP,dTDP/dTTP	MISC	Information systems
contig025100	vOTU009894	contig025100_32	K00560	thymidylate synthase [EC:2.1.1.45] [RN:R02101]	contig025100-cat_1_32	contig025100-cat_1	1	M	Pyrimidine deoxyribonuleotide biosynthesis, CDP/CTP => dCDP/dCTP,dTDP/dTTP	MISC	Information systems
contig025112	vOTU009965	contig025112_54	K01520	dUTP pyrophosphatase [EC:3.6.1.23] [RN:R02100]	contig025112-cat_1_54	contig025112-cat_1	2	M	Pyrimidine deoxyribonuleotide biosynthesis, CDP/CTP => dCDP/dCTP,dTDP/dTTP	MISC	Information systems
contig025460	vOTU061867	contig025460_13	K00558	DNA (cytosine-5-)-methyltransferase [EC:2.1.1.37] [RN:R04858]	contig025460-cat_1_13	contig025460-cat_1	2	M	Methionine degradation	Organic Nitrogen	Amino Acid
contig025630	vOTU009955	contig025630_5	K00558	DNA (cytosine-5-)-methyltransferase [EC:2.1.1.37] [RN:R04858]	contig025630-cat_1_5	contig025630-cat_1	2	MF	Methionine degradation	Organic Nitrogen	Amino Acid
contig025646	vOTU009961	contig025646_41	K01491	methylenetetrahydrofolate dehydrogenase (NADP+) / methenyltetrahydrofolate cyclohydrolase [EC:1.5.1.5 3.5.4.9] [RN:R01655 R01220]	contig025646-cat_1_41	contig025646-cat_1	2	M	Reductive acetyl-CoA pathway (Wood-Ljungdahl pathway)	Energy	C1
contig025669	vOTU009966	contig025669_24	K02050	ABC.SN.P; sulfonate/nitrate/taurine transport system permease protein	contig025669-cat_1_24	contig025669-cat_1	1	M	NitT/TauT family transport system	Transporters
contig026110	vOTU010311	contig026110_40	K01520	dUTP pyrophosphatase [EC:3.6.1.23] [RN:R02100]	contig026110-cat_1_40	contig026110-cat_1	2	M	Pyrimidine deoxyribonuleotide biosynthesis, CDP/CTP => dCDP/dCTP,dTDP/dTTP	MISC	Information systems
contig026110	vOTU010311	contig026110_45	K00558	DNA (cytosine-5-)-methyltransferase [EC:2.1.1.37] [RN:R04858]	contig026110-cat_1_45	contig026110-cat_1	2	M	Methionine degradation	Organic Nitrogen	Amino Acid
contig026280	vOTU010053	contig026280_9	K00558	DNA (cytosine-5-)-methyltransferase [EC:2.1.1.37] [RN:R04858]	contig026280-cat_1_9	contig026280-cat_1	2	M	Methionine degradation	Organic Nitrogen	Amino Acid
contig026280	vOTU010053	contig026280_11	K00789	S-adenosylmethionine synthetase [EC:2.5.1.6] [RN:R00177]	contig026280-cat_1_11	contig026280-cat_1	2	M	Cysteine biosynthesis, methionine => cysteine	Organic Nitrogen	Amino Acid
contig026280	vOTU010053	contig026280_11	K00789	S-adenosylmethionine synthetase [EC:2.5.1.6] [RN:R00177]	contig026280-cat_1_11	contig026280-cat_1	2	M	Methionine degradation	Organic Nitrogen	Amino Acid
contig026448	vOTU010315	contig026448_55	K21636	ribonucleoside-triphosphate reductase [EC:1.17.4.2 1.1.98.6] [RN:R02022 R11636]	contig026448-cat_1_55	contig026448-cat_1	1	M	Pyrimidine deoxyribonuleotide biosynthesis, CDP/CTP => dCDP/dCTP,dTDP/dTTP	MISC	Information systems
contig026448	vOTU010315	contig026448_56	K21636	ribonucleoside-triphosphate reductase [EC:1.17.4.2 1.1.98.6] [RN:R02022 R11636]	contig026448-cat_1_56	contig026448-cat_1	1	M	Pyrimidine deoxyribonuleotide biosynthesis, CDP/CTP => dCDP/dCTP,dTDP/dTTP	MISC	Information systems
contig026448	vOTU010315	contig026448_66	K01520	dUTP pyrophosphatase [EC:3.6.1.23] [RN:R02100]	contig026448-cat_1_66	contig026448-cat_1	1	M	Pyrimidine deoxyribonuleotide biosynthesis, CDP/CTP => dCDP/dCTP,dTDP/dTTP	MISC	Information systems
contig026467	vOTU010389	contig026467_145	K01520	dUTP pyrophosphatase [EC:3.6.1.23] [RN:R02100]	contig026467-cat_1_145	contig026467-cat_1	2	M	Pyrimidine deoxyribonuleotide biosynthesis, CDP/CTP => dCDP/dCTP,dTDP/dTTP	MISC	Information systems
contig026496	vOTU010083	contig026496_71	K00558	DNA (cytosine-5-)-methyltransferase [EC:2.1.1.37] [RN:R04858]	contig026496-cat_1_71	contig026496-cat_1	2	M	Methionine degradation	Organic Nitrogen	Amino Acid
contig026533	vOTU010086	contig026533_34	K00558	DNA (cytosine-5-)-methyltransferase [EC:2.1.1.37] [RN:R04858]	contig026533-cat_1_34	contig026533-cat_1	1	M	Methionine degradation	Organic Nitrogen	Amino Acid
contig026563	vOTU136497	contig026563_30	K01494	dCTP deaminase [EC:3.5.4.13] [RN:R02325]	contig026563-cat_1_30	contig026563-cat_1	1	M	Pyrimidine deoxyribonuleotide biosynthesis, CDP/CTP => dCDP/dCTP,dTDP/dTTP	MISC	Information systems
contig026645	vOTU010101	contig026645_38	K00558	DNA (cytosine-5-)-methyltransferase [EC:2.1.1.37] [RN:R04858]	contig026645-cat_1_38	contig026645-cat_1	2	MF	Methionine degradation	Organic Nitrogen	Amino Acid
contig026651	vOTU010103	contig026651_13	K00789	S-adenosylmethionine synthetase [EC:2.5.1.6] [RN:R00177]	contig026651-cat_1_13	contig026651-cat_1	2	M	Cysteine biosynthesis, methionine => cysteine	Organic Nitrogen	Amino Acid
contig026651	vOTU010103	contig026651_13	K00789	S-adenosylmethionine synthetase [EC:2.5.1.6] [RN:R00177]	contig026651-cat_1_13	contig026651-cat_1	2	M	Methionine degradation	Organic Nitrogen	Amino Acid
contig026651	vOTU010103	contig026651_15	K00558	DNA (cytosine-5-)-methyltransferase [EC:2.1.1.37] [RN:R04858]	contig026651-cat_1_15	contig026651-cat_1	2	M	Methionine degradation	Organic Nitrogen	Amino Acid
contig026886	vOTU010135	contig026886_20	K01520	dUTP pyrophosphatase [EC:3.6.1.23] [RN:R02100]	contig026886-cat_1_20	contig026886-cat_1	2	MF	Pyrimidine deoxyribonuleotide biosynthesis, CDP/CTP => dCDP/dCTP,dTDP/dTTP	MISC	Information systems
contig026886	vOTU010135	contig026886_22	K21636	ribonucleoside-triphosphate reductase [EC:1.17.4.2 1.1.98.6] [RN:R02022 R11636]	contig026886-cat_1_22	contig026886-cat_1	2	MF	Pyrimidine deoxyribonuleotide biosynthesis, CDP/CTP => dCDP/dCTP,dTDP/dTTP	MISC	Information systems
contig026964	vOTU010148	contig026964_11	K01520	dUTP pyrophosphatase [EC:3.6.1.23] [RN:R02100]	contig026964-cat_2_11	contig026964-cat_2	3	MF	Pyrimidine deoxyribonuleotide biosynthesis, CDP/CTP => dCDP/dCTP,dTDP/dTTP	MISC	Information systems
contig026971	vOTU010470	contig026971_28	K01520	dUTP pyrophosphatase [EC:3.6.1.23] [RN:R02100]	contig026971-cat_1_28	contig026971-cat_1	1	M	Pyrimidine deoxyribonuleotide biosynthesis, CDP/CTP => dCDP/dCTP,dTDP/dTTP	MISC	Information systems
contig026971	vOTU010470	contig026971_34	K21636	ribonucleoside-triphosphate reductase [EC:1.17.4.2 1.1.98.6] [RN:R02022 R11636]	contig026971-cat_1_34	contig026971-cat_1	1	M	Pyrimidine deoxyribonuleotide biosynthesis, CDP/CTP => dCDP/dCTP,dTDP/dTTP	MISC	Information systems
contig026973	vOTU010150	contig026973_58	K21636	ribonucleoside-triphosphate reductase [EC:1.17.4.2 1.1.98.6] [RN:R02022 R11636]	contig026973-cat_1_58	contig026973-cat_1	2	M	Pyrimidine deoxyribonuleotide biosynthesis, CDP/CTP => dCDP/dCTP,dTDP/dTTP	MISC	Information systems
contig026973	vOTU010150	contig026973_66	K01520	dUTP pyrophosphatase [EC:3.6.1.23] [RN:R02100]	contig026973-cat_1_66	contig026973-cat_1	2	M	Pyrimidine deoxyribonuleotide biosynthesis, CDP/CTP => dCDP/dCTP,dTDP/dTTP	MISC	Information systems
contig027176	vOTU010185	contig027176_91	K00789	S-adenosylmethionine synthetase [EC:2.5.1.6] [RN:R00177]	contig027176-cat_1_91	contig027176-cat_1	2	MF	Cysteine biosynthesis, methionine => cysteine	Organic Nitrogen	Amino Acid
contig027176	vOTU010185	contig027176_91	K00789	S-adenosylmethionine synthetase [EC:2.5.1.6] [RN:R00177]	contig027176-cat_1_91	contig027176-cat_1	2	MF	Methionine degradation	Organic Nitrogen	Amino Acid
contig027635	vOTU010244	contig027635_5	K21636	ribonucleoside-triphosphate reductase [EC:1.17.4.2 1.1.98.6] [RN:R02022 R11636]	contig027635-cat_1_5	contig027635-cat_1	2	MF	Pyrimidine deoxyribonuleotide biosynthesis, CDP/CTP => dCDP/dCTP,dTDP/dTTP	MISC	Information systems
contig027857	vOTU010257	contig027857_26	K00558	DNA (cytosine-5-)-methyltransferase [EC:2.1.1.37] [RN:R04858]	contig027857-cat_1_26	contig027857-cat_1	1	M	Methionine degradation	Organic Nitrogen	Amino Acid
contig028480	vOTU010340	contig028480_47	K21636	ribonucleoside-triphosphate reductase [EC:1.17.4.2 1.1.98.6] [RN:R02022 R11636]	contig028480-cat_1_47	contig028480-cat_1	2	M	Pyrimidine deoxyribonuleotide biosynthesis, CDP/CTP => dCDP/dCTP,dTDP/dTTP	MISC	Information systems
contig028911	vOTU010405	contig028911_42	K01520	dUTP pyrophosphatase [EC:3.6.1.23] [RN:R02100]	contig028911-cat_1_42	contig028911-cat_1	1	M	Pyrimidine deoxyribonuleotide biosynthesis, CDP/CTP => dCDP/dCTP,dTDP/dTTP	MISC	Information systems
contig028989	vOTU010421	contig028989_93	K01939	adenylosuccinate synthase [EC:6.3.4.4] [RN:R01135]	contig028989-cat_1_93	contig028989-cat_1	1	M	Adenine ribonucleotide biosynthesis, IMP => ADP,ATP	MISC	Information systems
contig028989	vOTU010421	contig028989_129	K21636	ribonucleoside-triphosphate reductase [EC:1.17.4.2 1.1.98.6] [RN:R02022 R11636]	contig028989-cat_1_129	contig028989-cat_1	2	M	Pyrimidine deoxyribonuleotide biosynthesis, CDP/CTP => dCDP/dCTP,dTDP/dTTP	MISC	Information systems
contig028989	vOTU010421	contig028989_132	K01520	dUTP pyrophosphatase [EC:3.6.1.23] [RN:R02100]	contig028989-cat_1_132	contig028989-cat_1	2	M	Pyrimidine deoxyribonuleotide biosynthesis, CDP/CTP => dCDP/dCTP,dTDP/dTTP	MISC	Information systems
contig029035	vOTU010431	contig029035_6	K00558	DNA (cytosine-5-)-methyltransferase [EC:2.1.1.37] [RN:R04858]	contig029035-cat_2_6	contig029035-cat_2	3	MF	Methionine degradation	Organic Nitrogen	Amino Acid
contig029035	vOTU010431	contig029035_13	K21636	ribonucleoside-triphosphate reductase [EC:1.17.4.2 1.1.98.6] [RN:R02022 R11636]	contig029035-cat_2_13	contig029035-cat_2	3	MF	Pyrimidine deoxyribonuleotide biosynthesis, CDP/CTP => dCDP/dCTP,dTDP/dTTP	MISC	Information systems
contig029280	vOTU094846	contig029280_45	K00558	DNA (cytosine-5-)-methyltransferase [EC:2.1.1.37] [RN:R04858]	contig029280-cat_1_45	contig029280-cat_1	1	M	Methionine degradation	Organic Nitrogen	Amino Acid
contig029915	vOTU010511	contig029915_32	K01520	dUTP pyrophosphatase [EC:3.6.1.23] [RN:R02100]	contig029915-cat_1_32	contig029915-cat_1	2	M	Pyrimidine deoxyribonuleotide biosynthesis, CDP/CTP => dCDP/dCTP,dTDP/dTTP	MISC	Information systems
contig029915	vOTU010511	contig029915_34	K21636	ribonucleoside-triphosphate reductase [EC:1.17.4.2 1.1.98.6] [RN:R02022 R11636]	contig029915-cat_1_34	contig029915-cat_1	2	M	Pyrimidine deoxyribonuleotide biosynthesis, CDP/CTP => dCDP/dCTP,dTDP/dTTP	MISC	Information systems
contig029915	vOTU010511	contig029915_37	K21636	ribonucleoside-triphosphate reductase [EC:1.17.4.2 1.1.98.6] [RN:R02022 R11636]	contig029915-cat_1_37	contig029915-cat_1	2	M	Pyrimidine deoxyribonuleotide biosynthesis, CDP/CTP => dCDP/dCTP,dTDP/dTTP	MISC	Information systems
contig029915	vOTU010511	contig029915_104	GT2	GT2 cellulose synthase (EC 2.4.1.12); chitin synthase (EC 2.4.1.16); dolichyl-phosphate beta-D-mannosyltransferase (EC 2.4.1.83); dolichyl-phosphate beta-glucosyltransferase (EC 2.4.1.117); N-acetylglucosaminyltransferase (EC 2.4.1.-); N-acetylgalactosaminyltransferase (EC 2.4.1.-); hyaluronan synthase (EC 2.4.1.212); chitin oligosaccharide synthase (EC 2.4.1.-); beta-1,3-glucan synthase (EC 2.4.…	contig029915-cat_1_104	contig029915-cat_1	1	M	GlycosylTransferases	carbon utilization	CAZY
contig029919	vOTU010626	contig029919_67	K01520	dUTP pyrophosphatase [EC:3.6.1.23] [RN:R02100]	contig029919-cat_1_67	contig029919-cat_1	1	M	Pyrimidine deoxyribonuleotide biosynthesis, CDP/CTP => dCDP/dCTP,dTDP/dTTP	MISC	Information systems
contig029964	vOTU010523	contig029964_22	S41B	Catlytic type: Serine; recognizes a C-terminal tripeptide, Xaa-Yaa-Zaa, in which Xaa is preferably Ala or Leu, Yaa is preferably Ala or Tyr and Zaa is preferably Ala and cleaves at a variable distance from the C-terminus; important for the degradation of incorrectly synthesized proteins	contig029964-cat_1_22	contig029964-cat_1	1	MF	Serine endopeptidases	Organic Nitrogen	Peptidase
contig030007	vOTU010535	contig030007_34	K00558	DNA (cytosine-5-)-methyltransferase [EC:2.1.1.37] [RN:R04858]	contig030007-cat_1_34	contig030007-cat_1	2	MF	Methionine degradation	Organic Nitrogen	Amino Acid
contig030007	vOTU010535	contig030007_36	K00789	S-adenosylmethionine synthetase [EC:2.5.1.6] [RN:R00177]	contig030007-cat_1_36	contig030007-cat_1	2	MF	Cysteine biosynthesis, methionine => cysteine	Organic Nitrogen	Amino Acid
contig030007	vOTU010535	contig030007_36	K00789	S-adenosylmethionine synthetase [EC:2.5.1.6] [RN:R00177]	contig030007-cat_1_36	contig030007-cat_1	2	MF	Methionine degradation	Organic Nitrogen	Amino Acid
contig030287	vOTU010618	contig030287_46	K00560	thymidylate synthase [EC:2.1.1.45] [RN:R02101]	contig030287-cat_1_46	contig030287-cat_1	2	M	Pyrimidine deoxyribonuleotide biosynthesis, CDP/CTP => dCDP/dCTP,dTDP/dTTP	MISC	Information systems
contig030287	vOTU010618	contig030287_54	K21636	ribonucleoside-triphosphate reductase [EC:1.17.4.2 1.1.98.6] [RN:R02022 R11636]	contig030287-cat_1_54	contig030287-cat_1	2	M	Pyrimidine deoxyribonuleotide biosynthesis, CDP/CTP => dCDP/dCTP,dTDP/dTTP	MISC	Information systems
contig030287	vOTU010618	contig030287_56	K21636	ribonucleoside-triphosphate reductase [EC:1.17.4.2 1.1.98.6] [RN:R02022 R11636]	contig030287-cat_1_56	contig030287-cat_1	2	M	Pyrimidine deoxyribonuleotide biosynthesis, CDP/CTP => dCDP/dCTP,dTDP/dTTP	MISC	Information systems
contig030287	vOTU010618	contig030287_127	K01520	dUTP pyrophosphatase [EC:3.6.1.23] [RN:R02100]	contig030287-cat_1_127	contig030287-cat_1	1	M	Pyrimidine deoxyribonuleotide biosynthesis, CDP/CTP => dCDP/dCTP,dTDP/dTTP	MISC	Information systems
contig030406	vOTU010649	contig030406_9	K01520	dUTP pyrophosphatase [EC:3.6.1.23] [RN:R02100]	contig030406-cat_1_9	contig030406-cat_1	2	MF	Pyrimidine deoxyribonuleotide biosynthesis, CDP/CTP => dCDP/dCTP,dTDP/dTTP	MISC	Information systems
contig030499	vOTU010678	contig030499_78	K21636	ribonucleoside-triphosphate reductase [EC:1.17.4.2 1.1.98.6] [RN:R02022 R11636]	contig030499-cat_1_78	contig030499-cat_1	1	M	Pyrimidine deoxyribonuleotide biosynthesis, CDP/CTP => dCDP/dCTP,dTDP/dTTP	MISC	Information systems
contig030499	vOTU010678	contig030499_118	K00560	thymidylate synthase [EC:2.1.1.45] [RN:R02101]	contig030499-cat_1_118	contig030499-cat_1	2	MF	Pyrimidine deoxyribonuleotide biosynthesis, CDP/CTP => dCDP/dCTP,dTDP/dTTP	MISC	Information systems
contig030792	vOTU010721	contig030792_38	K00558	DNA (cytosine-5-)-methyltransferase [EC:2.1.1.37] [RN:R04858]	contig030792-cat_1_38	contig030792-cat_1	2	MF	Methionine degradation	Organic Nitrogen	Amino Acid
contig030916	vOTU062245	contig030916_30	K01520	dUTP pyrophosphatase [EC:3.6.1.23] [RN:R02100]	contig030916-cat_1_30	contig030916-cat_1	2	M	Pyrimidine deoxyribonuleotide biosynthesis, CDP/CTP => dCDP/dCTP,dTDP/dTTP	MISC	Information systems
contig030929	vOTU062259	contig030929_57	K00558	DNA (cytosine-5-)-methyltransferase [EC:2.1.1.37] [RN:R04858]	contig030929-cat_1_57	contig030929-cat_1	1	MF	Methionine degradation	Organic Nitrogen	Amino Acid
contig030969	vOTU010761	contig030969_91	K01520	dUTP pyrophosphatase [EC:3.6.1.23] [RN:R02100]	contig030969-cat_1_91	contig030969-cat_1	2	MF	Pyrimidine deoxyribonuleotide biosynthesis, CDP/CTP => dCDP/dCTP,dTDP/dTTP	MISC	Information systems
contig031031	vOTU062338	contig031031_26	K00789	S-adenosylmethionine synthetase [EC:2.5.1.6] [RN:R00177]	contig031031-cat_1_26	contig031031-cat_1	1	M	Cysteine biosynthesis, methionine => cysteine	Organic Nitrogen	Amino Acid
contig031031	vOTU062338	contig031031_26	K00789	S-adenosylmethionine synthetase [EC:2.5.1.6] [RN:R00177]	contig031031-cat_1_26	contig031031-cat_1	1	M	Methionine degradation	Organic Nitrogen	Amino Acid
contig031149	vOTU010814	contig031149_48	K21636	ribonucleoside-triphosphate reductase [EC:1.17.4.2 1.1.98.6] [RN:R02022 R11636]	contig031149-cat_1_48	contig031149-cat_1	2	M	Pyrimidine deoxyribonuleotide biosynthesis, CDP/CTP => dCDP/dCTP,dTDP/dTTP	MISC	Information systems
contig031149	vOTU010814	contig031149_49	K01520	dUTP pyrophosphatase [EC:3.6.1.23] [RN:R02100]	contig031149-cat_1_49	contig031149-cat_1	2	M	Pyrimidine deoxyribonuleotide biosynthesis, CDP/CTP => dCDP/dCTP,dTDP/dTTP	MISC	Information systems
contig031246	vOTU010851	contig031246_15	K21636	ribonucleoside-triphosphate reductase [EC:1.17.4.2 1.1.98.6] [RN:R02022 R11636]	contig031246-cat_1_15	contig031246-cat_1	2	M	Pyrimidine deoxyribonuleotide biosynthesis, CDP/CTP => dCDP/dCTP,dTDP/dTTP	MISC	Information systems
contig031247	vOTU010852	contig031247_21	K00558	DNA (cytosine-5-)-methyltransferase [EC:2.1.1.37] [RN:R04858]	contig031247-cat_1_21	contig031247-cat_1	2	M	Methionine degradation	Organic Nitrogen	Amino Acid
contig031281	vOTU062268	contig031281_14	K00558	DNA (cytosine-5-)-methyltransferase [EC:2.1.1.37] [RN:R04858]	contig031281-cat_1_14	contig031281-cat_1	2	M	Methionine degradation	Organic Nitrogen	Amino Acid
contig031289	vOTU010859	contig031289_49	K01520	dUTP pyrophosphatase [EC:3.6.1.23] [RN:R02100]	contig031289-cat_1_49	contig031289-cat_1	2	M	Pyrimidine deoxyribonuleotide biosynthesis, CDP/CTP => dCDP/dCTP,dTDP/dTTP	MISC	Information systems
contig031454	vOTU010874	contig031454_15	K00558	DNA (cytosine-5-)-methyltransferase [EC:2.1.1.37] [RN:R04858]	contig031454-cat_2_15	contig031454-cat_2	3	MF	Methionine degradation	Organic Nitrogen	Amino Acid
contig031513	vOTU010886	contig031513_24	K00525	ribonucleoside-diphosphate reductase [EC:1.17.4.1] [RN:R02024]	contig031513-cat_1_24	contig031513-cat_1	2	MKE	Pyrimidine deoxyribonuleotide biosynthesis, CDP/CTP => dCDP/dCTP,dTDP/dTTP	MISC	Information systems
contig031564	vOTU010897	contig031564_14	K00558	DNA (cytosine-5-)-methyltransferase [EC:2.1.1.37] [RN:R04858]	contig031564-cat_1_14	contig031564-cat_1	1	M	Methionine degradation	Organic Nitrogen	Amino Acid
contig031583	vOTU010902	contig031583_50	K01520	dUTP pyrophosphatase [EC:3.6.1.23] [RN:R02100]	contig031583-cat_1_50	contig031583-cat_1	1	M	Pyrimidine deoxyribonuleotide biosynthesis, CDP/CTP => dCDP/dCTP,dTDP/dTTP	MISC	Information systems
contig031583	vOTU010902	contig031583_63	K21636	ribonucleoside-triphosphate reductase [EC:1.17.4.2 1.1.98.6] [RN:R02022 R11636]	contig031583-cat_1_63	contig031583-cat_1	1	M	Pyrimidine deoxyribonuleotide biosynthesis, CDP/CTP => dCDP/dCTP,dTDP/dTTP	MISC	Information systems
contig031743	vOTU010935	contig031743_4	K21636	ribonucleoside-triphosphate reductase [EC:1.17.4.2 1.1.98.6] [RN:R02022 R11636]	contig031743-cat_2_4	contig031743-cat_2	3	MF	Pyrimidine deoxyribonuleotide biosynthesis, CDP/CTP => dCDP/dCTP,dTDP/dTTP	MISC	Information systems
contig031771	vOTU010943	contig031771_17	K00558	DNA (cytosine-5-)-methyltransferase [EC:2.1.1.37] [RN:R04858]	contig031771-cat_1_17	contig031771-cat_1	1	M	Methionine degradation	Organic Nitrogen	Amino Acid
contig031812	vOTU010956	contig031812_58	K00558	DNA (cytosine-5-)-methyltransferase [EC:2.1.1.37] [RN:R04858]	contig031812-cat_1_58	contig031812-cat_1	2	M	Methionine degradation	Organic Nitrogen	Amino Acid
contig031812	vOTU010956	contig031812_60	K00789	S-adenosylmethionine synthetase [EC:2.5.1.6] [RN:R00177]	contig031812-cat_1_60	contig031812-cat_1	2	M	Cysteine biosynthesis, methionine => cysteine	Organic Nitrogen	Amino Acid
contig031812	vOTU010956	contig031812_60	K00789	S-adenosylmethionine synthetase [EC:2.5.1.6] [RN:R00177]	contig031812-cat_1_60	contig031812-cat_1	2	M	Methionine degradation	Organic Nitrogen	Amino Acid
contig031812	vOTU010956	contig031812_79	K00558	DNA (cytosine-5-)-methyltransferase [EC:2.1.1.37] [RN:R04858]	contig031812-cat_1_79	contig031812-cat_1	2	M	Methionine degradation	Organic Nitrogen	Amino Acid
contig031825	vOTU010958	contig031825_10	K01520	dUTP pyrophosphatase [EC:3.6.1.23] [RN:R02100]	contig031825-cat_1_10	contig031825-cat_1	2	MF	Pyrimidine deoxyribonuleotide biosynthesis, CDP/CTP => dCDP/dCTP,dTDP/dTTP	MISC	Information systems
contig031830	vOTU010963	contig031830_99	K01520	dUTP pyrophosphatase [EC:3.6.1.23] [RN:R02100]	contig031830-cat_1_99	contig031830-cat_1	1	M	Pyrimidine deoxyribonuleotide biosynthesis, CDP/CTP => dCDP/dCTP,dTDP/dTTP	MISC	Information systems
contig031830	vOTU010963	contig031830_102	K21636	ribonucleoside-triphosphate reductase [EC:1.17.4.2 1.1.98.6] [RN:R02022 R11636]	contig031830-cat_1_102	contig031830-cat_1	1	M	Pyrimidine deoxyribonuleotide biosynthesis, CDP/CTP => dCDP/dCTP,dTDP/dTTP	MISC	Information systems
contig031830	vOTU010963	contig031830_137	K01939	adenylosuccinate synthase [EC:6.3.4.4] [RN:R01135]	contig031830-cat_1_137	contig031830-cat_1	2	M	Adenine ribonucleotide biosynthesis, IMP => ADP,ATP	MISC	Information systems
contig031848	vOTU010971	contig031848_8	K00558	DNA (cytosine-5-)-methyltransferase [EC:2.1.1.37] [RN:R04858]	contig031848-cat_1_8	contig031848-cat_1	2	MF	Methionine degradation	Organic Nitrogen	Amino Acid
contig031965	vOTU011014	contig031965_10	K00558	DNA (cytosine-5-)-methyltransferase [EC:2.1.1.37] [RN:R04858]	contig031965-cat_1_10	contig031965-cat_1	2	M	Methionine degradation	Organic Nitrogen	Amino Acid
contig032041	vOTU011060	contig032041_106	K01939	adenylosuccinate synthase [EC:6.3.4.4] [RN:R01135]	contig032041-cat_1_106	contig032041-cat_1	1	M	Adenine ribonucleotide biosynthesis, IMP => ADP,ATP	MISC	Information systems
contig032041	vOTU011060	contig032041_140	K00558	DNA (cytosine-5-)-methyltransferase [EC:2.1.1.37] [RN:R04858]	contig032041-cat_1_140	contig032041-cat_1	1	MF	Methionine degradation	Organic Nitrogen	Amino Acid
contig032167	vOTU011135	contig032167_20	K21636	ribonucleoside-triphosphate reductase [EC:1.17.4.2 1.1.98.6] [RN:R02022 R11636]	contig032167-cat_1_20	contig032167-cat_1	2	M	Pyrimidine deoxyribonuleotide biosynthesis, CDP/CTP => dCDP/dCTP,dTDP/dTTP	MISC	Information systems
contig032167	vOTU011135	contig032167_22	K21636	ribonucleoside-triphosphate reductase [EC:1.17.4.2 1.1.98.6] [RN:R02022 R11636]	contig032167-cat_1_22	contig032167-cat_1	2	M	Pyrimidine deoxyribonuleotide biosynthesis, CDP/CTP => dCDP/dCTP,dTDP/dTTP	MISC	Information systems
contig032167	vOTU011135	contig032167_27	K01520	dUTP pyrophosphatase [EC:3.6.1.23] [RN:R02100]	contig032167-cat_1_27	contig032167-cat_1	2	M	Pyrimidine deoxyribonuleotide biosynthesis, CDP/CTP => dCDP/dCTP,dTDP/dTTP	MISC	Information systems
contig032180	vOTU011143	contig032180_20	K00558	DNA (cytosine-5-)-methyltransferase [EC:2.1.1.37] [RN:R04858]	contig032180-cat_1_20	contig032180-cat_1	2	M	Methionine degradation	Organic Nitrogen	Amino Acid
contig032232	vOTU011171	contig032232_7	K01494	dCTP deaminase [EC:3.5.4.13] [RN:R02325]	contig032232-cat_2_7	contig032232-cat_2	3	MF	Pyrimidine deoxyribonuleotide biosynthesis, CDP/CTP => dCDP/dCTP,dTDP/dTTP	MISC	Information systems
contig032272	vOTU011186	contig032272_10	K00558	DNA (cytosine-5-)-methyltransferase [EC:2.1.1.37] [RN:R04858]	contig032272-cat_1_10	contig032272-cat_1	2	MF	Methionine degradation	Organic Nitrogen	Amino Acid
contig032290	vOTU011192	contig032290_43	K00525	ribonucleoside-diphosphate reductase [EC:1.17.4.1] [RN:R02024]	contig032290-cat_1_43	contig032290-cat_1	2	MKE	Pyrimidine deoxyribonuleotide biosynthesis, CDP/CTP => dCDP/dCTP,dTDP/dTTP	MISC	Information systems
contig032290	vOTU011192	contig032290_47	K01520	dUTP pyrophosphatase [EC:3.6.1.23] [RN:R02100]	contig032290-cat_1_47	contig032290-cat_1	2	M	Pyrimidine deoxyribonuleotide biosynthesis, CDP/CTP => dCDP/dCTP,dTDP/dTTP	MISC	Information systems
contig032386	vOTU011234	contig032386_69	K21636	ribonucleoside-triphosphate reductase [EC:1.17.4.2 1.1.98.6] [RN:R02022 R11636]	contig032386-cat_1_69	contig032386-cat_1	2	M	Pyrimidine deoxyribonuleotide biosynthesis, CDP/CTP => dCDP/dCTP,dTDP/dTTP	MISC	Information systems
contig032399	vOTU011244	contig032399_57	K00558	DNA (cytosine-5-)-methyltransferase [EC:2.1.1.37] [RN:R04858]	contig032399-cat_1_57	contig032399-cat_1	2	M	Methionine degradation	Organic Nitrogen	Amino Acid
contig032574	vOTU011340	contig032574_18	K00558	DNA (cytosine-5-)-methyltransferase [EC:2.1.1.37] [RN:R04858]	contig032574-cat_1_18	contig032574-cat_1	2	M	Methionine degradation	Organic Nitrogen	Amino Acid
contig032574	vOTU011340	contig032574_20	K01520	dUTP pyrophosphatase [EC:3.6.1.23] [RN:R02100]	contig032574-cat_1_20	contig032574-cat_1	2	M	Pyrimidine deoxyribonuleotide biosynthesis, CDP/CTP => dCDP/dCTP,dTDP/dTTP	MISC	Information systems
contig032599	vOTU011357	contig032599_41	K01520	dUTP pyrophosphatase [EC:3.6.1.23] [RN:R02100]	contig032599-cat_1_41	contig032599-cat_1	2	M	Pyrimidine deoxyribonuleotide biosynthesis, CDP/CTP => dCDP/dCTP,dTDP/dTTP	MISC	Information systems
contig032706	vOTU011427	contig032706_39	K01520	dUTP pyrophosphatase [EC:3.6.1.23] [RN:R02100]	contig032706-cat_1_39	contig032706-cat_1	2	MF	Pyrimidine deoxyribonuleotide biosynthesis, CDP/CTP => dCDP/dCTP,dTDP/dTTP	MISC	Information systems
contig032774	vOTU011468	contig032774_6	K00558	DNA (cytosine-5-)-methyltransferase [EC:2.1.1.37] [RN:R04858]	contig032774-cat_1_6	contig032774-cat_1	2	M	Methionine degradation	Organic Nitrogen	Amino Acid
contig032774	vOTU011468	contig032774_234	K09883	cobT; cobaltochelatase CobT [EC:6.6.1.2]	contig032774-cat_1_234	contig032774-cat_1	2	M	Cobalamin biosynthesis, precorrin2 => cobinamide	MISC	aerobic corrin ring synthesis
contig032774	vOTU011468	contig032774_238	K01520	dUTP pyrophosphatase [EC:3.6.1.23] [RN:R02100]	contig032774-cat_1_238	contig032774-cat_1	2	M	Pyrimidine deoxyribonuleotide biosynthesis, CDP/CTP => dCDP/dCTP,dTDP/dTTP	MISC	Information systems
contig032780	vOTU011471	contig032780_157	K01520	dUTP pyrophosphatase [EC:3.6.1.23] [RN:R02100]	contig032780-cat_1_157	contig032780-cat_1	1	M	Pyrimidine deoxyribonuleotide biosynthesis, CDP/CTP => dCDP/dCTP,dTDP/dTTP	MISC	Information systems
contig032783	vOTU011473	contig032783_8	K21636	ribonucleoside-triphosphate reductase [EC:1.17.4.2 1.1.98.6] [RN:R02022 R11636]	contig032783-cat_1_8	contig032783-cat_1	2	MF	Pyrimidine deoxyribonuleotide biosynthesis, CDP/CTP => dCDP/dCTP,dTDP/dTTP	MISC	Information systems
contig032789	vOTU011477	contig032789_122	K01520	dUTP pyrophosphatase [EC:3.6.1.23] [RN:R02100]	contig032789-cat_1_122	contig032789-cat_1	2	M	Pyrimidine deoxyribonuleotide biosynthesis, CDP/CTP => dCDP/dCTP,dTDP/dTTP	MISC	Information systems
contig032797	vOTU011483	contig032797_43	K00558	DNA (cytosine-5-)-methyltransferase [EC:2.1.1.37] [RN:R04858]	contig032797-cat_1_43	contig032797-cat_1	2	MF	Methionine degradation	Organic Nitrogen	Amino Acid
contig032809	vOTU011488	contig032809_52	K01520	dUTP pyrophosphatase [EC:3.6.1.23] [RN:R02100]	contig032809-cat_1_52	contig032809-cat_1	2	M	Pyrimidine deoxyribonuleotide biosynthesis, CDP/CTP => dCDP/dCTP,dTDP/dTTP	MISC	Information systems
contig032809	vOTU011488	contig032809_71	K21636	ribonucleoside-triphosphate reductase [EC:1.17.4.2 1.1.98.6] [RN:R02022 R11636]	contig032809-cat_1_71	contig032809-cat_1	2	M	Pyrimidine deoxyribonuleotide biosynthesis, CDP/CTP => dCDP/dCTP,dTDP/dTTP	MISC	Information systems
contig032811	vOTU011489	contig032811_53	K01520	dUTP pyrophosphatase [EC:3.6.1.23] [RN:R02100]	contig032811-cat_1_53	contig032811-cat_1	1	M	Pyrimidine deoxyribonuleotide biosynthesis, CDP/CTP => dCDP/dCTP,dTDP/dTTP	MISC	Information systems
contig032811	vOTU011489	contig032811_94	K21636	ribonucleoside-triphosphate reductase [EC:1.17.4.2 1.1.98.6] [RN:R02022 R11636]	contig032811-cat_1_94	contig032811-cat_1	1	M	Pyrimidine deoxyribonuleotide biosynthesis, CDP/CTP => dCDP/dCTP,dTDP/dTTP	MISC	Information systems
contig032853	vOTU011517	contig032853_29	K00558	DNA (cytosine-5-)-methyltransferase [EC:2.1.1.37] [RN:R04858]	contig032853-cat_2_29	contig032853-cat_2	3	M	Methionine degradation	Organic Nitrogen	Amino Acid
contig032856	vOTU011519	contig032856_25	K01520	dUTP pyrophosphatase [EC:3.6.1.23] [RN:R02100]	contig032856-cat_1_25	contig032856-cat_1	2	MF	Pyrimidine deoxyribonuleotide biosynthesis, CDP/CTP => dCDP/dCTP,dTDP/dTTP	MISC	Information systems
contig032859	vOTU011522	contig032859_9	K01520	dUTP pyrophosphatase [EC:3.6.1.23] [RN:R02100]	contig032859-cat_1_9	contig032859-cat_1	2	MF	Pyrimidine deoxyribonuleotide biosynthesis, CDP/CTP => dCDP/dCTP,dTDP/dTTP	MISC	Information systems
contig032872	vOTU011530	contig032872_12	K01520	dUTP pyrophosphatase [EC:3.6.1.23] [RN:R02100]	contig032872-cat_1_12	contig032872-cat_1	2	MF	Pyrimidine deoxyribonuleotide biosynthesis, CDP/CTP => dCDP/dCTP,dTDP/dTTP	MISC	Information systems
contig032912	vOTU011558	contig032912_22	K01520	dUTP pyrophosphatase [EC:3.6.1.23] [RN:R02100]	contig032912-cat_1_22	contig032912-cat_1	2	M	Pyrimidine deoxyribonuleotide biosynthesis, CDP/CTP => dCDP/dCTP,dTDP/dTTP	MISC	Information systems
contig032922	vOTU011566	contig032922_123	K01520	dUTP pyrophosphatase [EC:3.6.1.23] [RN:R02100]	contig032922-cat_1_123	contig032922-cat_1	2	M	Pyrimidine deoxyribonuleotide biosynthesis, CDP/CTP => dCDP/dCTP,dTDP/dTTP	MISC	Information systems
contig032922	vOTU011566	contig032922_129	K21636	ribonucleoside-triphosphate reductase [EC:1.17.4.2 1.1.98.6] [RN:R02022 R11636]	contig032922-cat_1_129	contig032922-cat_1	2	M	Pyrimidine deoxyribonuleotide biosynthesis, CDP/CTP => dCDP/dCTP,dTDP/dTTP	MISC	Information systems
contig033013	vOTU011621	contig033013_44	K00525	ribonucleoside-diphosphate reductase [EC:1.17.4.1] [RN:R02024]	contig033013-cat_2_44	contig033013-cat_2	3	MKE	Pyrimidine deoxyribonuleotide biosynthesis, CDP/CTP => dCDP/dCTP,dTDP/dTTP	MISC	Information systems
contig033013	vOTU011621	contig033013_50	K01520	dUTP pyrophosphatase [EC:3.6.1.23] [RN:R02100]	contig033013-cat_2_50	contig033013-cat_2	3	M	Pyrimidine deoxyribonuleotide biosynthesis, CDP/CTP => dCDP/dCTP,dTDP/dTTP	MISC	Information systems
contig033035	vOTU011637	contig033035_6	K01520	dUTP pyrophosphatase [EC:3.6.1.23] [RN:R02100]	contig033035-cat_2_6	contig033035-cat_2	3	MF	Pyrimidine deoxyribonuleotide biosynthesis, CDP/CTP => dCDP/dCTP,dTDP/dTTP	MISC	Information systems
contig033036	vOTU011638	contig033036_33	K21636	ribonucleoside-triphosphate reductase [EC:1.17.4.2 1.1.98.6] [RN:R02022 R11636]	contig033036-cat_1_33	contig033036-cat_1	1	M	Pyrimidine deoxyribonuleotide biosynthesis, CDP/CTP => dCDP/dCTP,dTDP/dTTP	MISC	Information systems
contig033046	vOTU011643	contig033046_75	K00558	DNA (cytosine-5-)-methyltransferase [EC:2.1.1.37] [RN:R04858]	contig033046-cat_1_75	contig033046-cat_1	2	M	Methionine degradation	Organic Nitrogen	Amino Acid
contig033075	vOTU011114	contig033075_16	K00789	S-adenosylmethionine synthetase [EC:2.5.1.6] [RN:R00177]	contig033075-cat_1_16	contig033075-cat_1	2	MF	Cysteine biosynthesis, methionine => cysteine	Organic Nitrogen	Amino Acid
contig033075	vOTU011114	contig033075_16	K00789	S-adenosylmethionine synthetase [EC:2.5.1.6] [RN:R00177]	contig033075-cat_1_16	contig033075-cat_1	2	MF	Methionine degradation	Organic Nitrogen	Amino Acid
contig033076	vOTU011659	contig033076_20	K00558	DNA (cytosine-5-)-methyltransferase [EC:2.1.1.37] [RN:R04858]	contig033076-cat_1_20	contig033076-cat_1	2	M	Methionine degradation	Organic Nitrogen	Amino Acid
contig033187	vOTU011710	contig033187_20	K01494	dCTP deaminase [EC:3.5.4.13] [RN:R02325]	contig033187-cat_1_20	contig033187-cat_1	1	MF	Pyrimidine deoxyribonuleotide biosynthesis, CDP/CTP => dCDP/dCTP,dTDP/dTTP	MISC	Information systems
contig033262	vOTU011739	contig033262_2	K01520	dUTP pyrophosphatase [EC:3.6.1.23] [RN:R02100]	contig033262-cat_1_2	contig033262-cat_1	2	MF	Pyrimidine deoxyribonuleotide biosynthesis, CDP/CTP => dCDP/dCTP,dTDP/dTTP	MISC	Information systems
contig033328	vOTU011989	contig033328_4	K00789	S-adenosylmethionine synthetase [EC:2.5.1.6] [RN:R00177]	contig033328-cat_1_4	contig033328-cat_1	2	MF	Cysteine biosynthesis, methionine => cysteine	Organic Nitrogen	Amino Acid
contig033328	vOTU011989	contig033328_4	K00789	S-adenosylmethionine synthetase [EC:2.5.1.6] [RN:R00177]	contig033328-cat_1_4	contig033328-cat_1	2	MF	Methionine degradation	Organic Nitrogen	Amino Acid
contig033368	vOTU011787	contig033368_4	K01520	dUTP pyrophosphatase [EC:3.6.1.23] [RN:R02100]	contig033368-cat_1_4	contig033368-cat_1	2	MF	Pyrimidine deoxyribonuleotide biosynthesis, CDP/CTP => dCDP/dCTP,dTDP/dTTP	MISC	Information systems
contig033421	vOTU011811	contig033421_7	K01520	dUTP pyrophosphatase [EC:3.6.1.23] [RN:R02100]	contig033421-cat_1_7	contig033421-cat_1	2	MF	Pyrimidine deoxyribonuleotide biosynthesis, CDP/CTP => dCDP/dCTP,dTDP/dTTP	MISC	Information systems
contig033498	vOTU011847	contig033498_15	K01520	dUTP pyrophosphatase [EC:3.6.1.23] [RN:R02100]	contig033498-cat_1_15	contig033498-cat_1	2	MF	Pyrimidine deoxyribonuleotide biosynthesis, CDP/CTP => dCDP/dCTP,dTDP/dTTP	MISC	Information systems
contig033506	vOTU011851	contig033506_17	K00558	DNA (cytosine-5-)-methyltransferase [EC:2.1.1.37] [RN:R04858]	contig033506-cat_1_17	contig033506-cat_1	2	M	Methionine degradation	Organic Nitrogen	Amino Acid
contig033528	vOTU011860	contig033528_18	K00558	DNA (cytosine-5-)-methyltransferase [EC:2.1.1.37] [RN:R04858]	contig033528-cat_1_18	contig033528-cat_1	2	M	Methionine degradation	Organic Nitrogen	Amino Acid
contig033533	vOTU011862	contig033533_44	K01494	dCTP deaminase [EC:3.5.4.13] [RN:R02325]	contig033533-cat_1_44	contig033533-cat_1	1	M	Pyrimidine deoxyribonuleotide biosynthesis, CDP/CTP => dCDP/dCTP,dTDP/dTTP	MISC	Information systems
contig033569	vOTU011880	contig033569_26	K00558	DNA (cytosine-5-)-methyltransferase [EC:2.1.1.37] [RN:R04858]	contig033569-cat_1_26	contig033569-cat_1	2	M	Methionine degradation	Organic Nitrogen	Amino Acid
contig033645	vOTU011912	contig033645_6	K00558	DNA (cytosine-5-)-methyltransferase [EC:2.1.1.37] [RN:R04858]	contig033645-cat_1_6	contig033645-cat_1	2	MF	Methionine degradation	Organic Nitrogen	Amino Acid
contig033675	vOTU011932	contig033675_52	K01520	dUTP pyrophosphatase [EC:3.6.1.23] [RN:R02100]	contig033675-cat_1_52	contig033675-cat_1	2	M	Pyrimidine deoxyribonuleotide biosynthesis, CDP/CTP => dCDP/dCTP,dTDP/dTTP	MISC	Information systems
contig033675	vOTU011932	contig033675_67	K01939	adenylosuccinate synthase [EC:6.3.4.4] [RN:R01135]	contig033675-cat_1_67	contig033675-cat_1	2	M	Adenine ribonucleotide biosynthesis, IMP => ADP,ATP	MISC	Information systems
contig033676	vOTU011933	contig033676_15	K00558	DNA (cytosine-5-)-methyltransferase [EC:2.1.1.37] [RN:R04858]	contig033676-cat_1_15	contig033676-cat_1	2	M	Methionine degradation	Organic Nitrogen	Amino Acid
contig033720	vOTU011963	contig033720_35	K01520	dUTP pyrophosphatase [EC:3.6.1.23] [RN:R02100]	contig033720-cat_1_35	contig033720-cat_1	2	M	Pyrimidine deoxyribonuleotide biosynthesis, CDP/CTP => dCDP/dCTP,dTDP/dTTP	MISC	Information systems
contig033768	vOTU011991	contig033768_58	K00558	DNA (cytosine-5-)-methyltransferase [EC:2.1.1.37] [RN:R04858]	contig033768-cat_1_58	contig033768-cat_1	1	M	Methionine degradation	Organic Nitrogen	Amino Acid
contig033796	vOTU012007	contig033796_67	K21636	ribonucleoside-triphosphate reductase [EC:1.17.4.2 1.1.98.6] [RN:R02022 R11636]	contig033796-cat_1_67	contig033796-cat_1	2	M	Pyrimidine deoxyribonuleotide biosynthesis, CDP/CTP => dCDP/dCTP,dTDP/dTTP	MISC	Information systems
contig033796	vOTU012007	contig033796_70	K01520	dUTP pyrophosphatase [EC:3.6.1.23] [RN:R02100]	contig033796-cat_1_70	contig033796-cat_1	2	M	Pyrimidine deoxyribonuleotide biosynthesis, CDP/CTP => dCDP/dCTP,dTDP/dTTP	MISC	Information systems
contig033885	vOTU012066	contig033885_18	K00656	formate acetyltransferase (pyruvate-formate lyase )	contig033885-cat_1_18	contig033885-cat_1	2	M	pyruvate metabolism	carbon utilization	pyruvate metabolism
contig033885	vOTU012066	contig033885_54	K21636	ribonucleoside-triphosphate reductase [EC:1.17.4.2 1.1.98.6] [RN:R02022 R11636]	contig033885-cat_1_54	contig033885-cat_1	2	M	Pyrimidine deoxyribonuleotide biosynthesis, CDP/CTP => dCDP/dCTP,dTDP/dTTP	MISC	Information systems
contig033885	vOTU012066	contig033885_59	K01520	dUTP pyrophosphatase [EC:3.6.1.23] [RN:R02100]	contig033885-cat_1_59	contig033885-cat_1	2	M	Pyrimidine deoxyribonuleotide biosynthesis, CDP/CTP => dCDP/dCTP,dTDP/dTTP	MISC	Information systems
contig033891	vOTU012069	contig033891_25	K01520	dUTP pyrophosphatase [EC:3.6.1.23] [RN:R02100]	contig033891-cat_1_25	contig033891-cat_1	2	M	Pyrimidine deoxyribonuleotide biosynthesis, CDP/CTP => dCDP/dCTP,dTDP/dTTP	MISC	Information systems
contig033891	vOTU012069	contig033891_27	K21636	ribonucleoside-triphosphate reductase [EC:1.17.4.2 1.1.98.6] [RN:R02022 R11636]	contig033891-cat_1_27	contig033891-cat_1	2	M	Pyrimidine deoxyribonuleotide biosynthesis, CDP/CTP => dCDP/dCTP,dTDP/dTTP	MISC	Information systems
contig033906	vOTU012080	contig033906_25	K00558	DNA (cytosine-5-)-methyltransferase [EC:2.1.1.37] [RN:R04858]	contig033906-cat_1_25	contig033906-cat_1	2	M	Methionine degradation	Organic Nitrogen	Amino Acid
contig033935	vOTU012095	contig033935_33	K01520	dUTP pyrophosphatase [EC:3.6.1.23] [RN:R02100]	contig033935-cat_1_33	contig033935-cat_1	2	M	Pyrimidine deoxyribonuleotide biosynthesis, CDP/CTP => dCDP/dCTP,dTDP/dTTP	MISC	Information systems
contig033940	vOTU012099	contig033940_38	K00789	S-adenosylmethionine synthetase [EC:2.5.1.6] [RN:R00177]	contig033940-cat_1_38	contig033940-cat_1	1	M	Cysteine biosynthesis, methionine => cysteine	Organic Nitrogen	Amino Acid
contig033940	vOTU012099	contig033940_38	K00789	S-adenosylmethionine synthetase [EC:2.5.1.6] [RN:R00177]	contig033940-cat_1_38	contig033940-cat_1	1	M	Methionine degradation	Organic Nitrogen	Amino Acid
contig033940	vOTU012099	contig033940_46	K00558	DNA (cytosine-5-)-methyltransferase [EC:2.1.1.37] [RN:R04858]	contig033940-cat_1_46	contig033940-cat_1	1	MF	Methionine degradation	Organic Nitrogen	Amino Acid
contig033966	vOTU012113	contig033966_89	K01520	dUTP pyrophosphatase [EC:3.6.1.23] [RN:R02100]	contig033966-cat_1_89	contig033966-cat_1	2	M	Pyrimidine deoxyribonuleotide biosynthesis, CDP/CTP => dCDP/dCTP,dTDP/dTTP	MISC	Information systems
contig033966	vOTU012113	contig033966_95	K21636	ribonucleoside-triphosphate reductase [EC:1.17.4.2 1.1.98.6] [RN:R02022 R11636]	contig033966-cat_1_95	contig033966-cat_1	2	M	Pyrimidine deoxyribonuleotide biosynthesis, CDP/CTP => dCDP/dCTP,dTDP/dTTP	MISC	Information systems
contig033999	vOTU012134	contig033999_5	K01520	dUTP pyrophosphatase [EC:3.6.1.23] [RN:R02100]	contig033999-cat_1_5	contig033999-cat_1	2	MF	Pyrimidine deoxyribonuleotide biosynthesis, CDP/CTP => dCDP/dCTP,dTDP/dTTP	MISC	Information systems
contig033999	vOTU012134	contig033999_9	K21636	ribonucleoside-triphosphate reductase [EC:1.17.4.2 1.1.98.6] [RN:R02022 R11636]	contig033999-cat_1_9	contig033999-cat_1	2	MF	Pyrimidine deoxyribonuleotide biosynthesis, CDP/CTP => dCDP/dCTP,dTDP/dTTP	MISC	Information systems
contig034019	vOTU012143	contig034019_7	K01520	dUTP pyrophosphatase [EC:3.6.1.23] [RN:R02100]	contig034019-cat_1_7	contig034019-cat_1	1	MF	Pyrimidine deoxyribonuleotide biosynthesis, CDP/CTP => dCDP/dCTP,dTDP/dTTP	MISC	Information systems
contig034019	vOTU012143	contig034019_27	K00558	DNA (cytosine-5-)-methyltransferase [EC:2.1.1.37] [RN:R04858]	contig034019-cat_1_27	contig034019-cat_1	1	M	Methionine degradation	Organic Nitrogen	Amino Acid
contig034022	vOTU012144	contig034022_70	K21636	ribonucleoside-triphosphate reductase [EC:1.17.4.2 1.1.98.6] [RN:R02022 R11636]	contig034022-cat_1_70	contig034022-cat_1	2	M	Pyrimidine deoxyribonuleotide biosynthesis, CDP/CTP => dCDP/dCTP,dTDP/dTTP	MISC	Information systems
contig034022	vOTU012144	contig034022_76	K01520	dUTP pyrophosphatase [EC:3.6.1.23] [RN:R02100]	contig034022-cat_1_76	contig034022-cat_1	2	M	Pyrimidine deoxyribonuleotide biosynthesis, CDP/CTP => dCDP/dCTP,dTDP/dTTP	MISC	Information systems
contig034024	vOTU012146	contig034024_42	K21636	ribonucleoside-triphosphate reductase [EC:1.17.4.2 1.1.98.6] [RN:R02022 R11636]	contig034024-cat_1_42	contig034024-cat_1	1	M	Pyrimidine deoxyribonuleotide biosynthesis, CDP/CTP => dCDP/dCTP,dTDP/dTTP	MISC	Information systems
contig034024	vOTU012146	contig034024_46	K01520	dUTP pyrophosphatase [EC:3.6.1.23] [RN:R02100]	contig034024-cat_1_46	contig034024-cat_1	1	M	Pyrimidine deoxyribonuleotide biosynthesis, CDP/CTP => dCDP/dCTP,dTDP/dTTP	MISC	Information systems
contig034024	vOTU012146	contig034024_88	S51	Catlytic type: Serine; hydrolyses Asp-Xaa dipeptides in which Xaa is not Glu, Asn or Gln; nutritional function in bacteria	contig034024-cat_1_88	contig034024-cat_1	1	M	Exopeptidases that hydrolyse alpha-aspartyl bonds	Organic Nitrogen	Peptidase
contig034026	vOTU012148	contig034026_61	K01520	dUTP pyrophosphatase [EC:3.6.1.23] [RN:R02100]	contig034026-cat_1_61	contig034026-cat_1	2	M	Pyrimidine deoxyribonuleotide biosynthesis, CDP/CTP => dCDP/dCTP,dTDP/dTTP	MISC	Information systems
contig034026	vOTU012148	contig034026_63	K00525	ribonucleoside-diphosphate reductase [EC:1.17.4.1] [RN:R02024]	contig034026-cat_1_63	contig034026-cat_1	2	MKE	Pyrimidine deoxyribonuleotide biosynthesis, CDP/CTP => dCDP/dCTP,dTDP/dTTP	MISC	Information systems
contig034031	vOTU012153	contig034031_30	S51	Catlytic type: Serine; hydrolyses Asp-Xaa dipeptides in which Xaa is not Glu, Asn or Gln; nutritional function in bacteria	contig034031-cat_1_30	contig034031-cat_1	2	M	Exopeptidases that hydrolyse alpha-aspartyl bonds	Organic Nitrogen	Peptidase
contig034067	vOTU012171	contig034067_16	K00558	DNA (cytosine-5-)-methyltransferase [EC:2.1.1.37] [RN:R04858]	contig034067-cat_1_16	contig034067-cat_1	2	MF	Methionine degradation	Organic Nitrogen	Amino Acid
contig034075	vOTU012178	contig034075_36	K00558	DNA (cytosine-5-)-methyltransferase [EC:2.1.1.37] [RN:R04858]	contig034075-cat_1_36	contig034075-cat_1	2	M	Methionine degradation	Organic Nitrogen	Amino Acid
contig034113	vOTU012199	contig034113_86	K01520	dUTP pyrophosphatase [EC:3.6.1.23] [RN:R02100]	contig034113-cat_1_86	contig034113-cat_1	2	M	Pyrimidine deoxyribonuleotide biosynthesis, CDP/CTP => dCDP/dCTP,dTDP/dTTP	MISC	Information systems
contig034144	vOTU012217	contig034144_7	K21636	ribonucleoside-triphosphate reductase [EC:1.17.4.2 1.1.98.6] [RN:R02022 R11636]	contig034144-cat_1_7	contig034144-cat_1	2	MF	Pyrimidine deoxyribonuleotide biosynthesis, CDP/CTP => dCDP/dCTP,dTDP/dTTP	MISC	Information systems
contig034144	vOTU012217	contig034144_9	K21636	ribonucleoside-triphosphate reductase [EC:1.17.4.2 1.1.98.6] [RN:R02022 R11636]	contig034144-cat_1_9	contig034144-cat_1	2	MF	Pyrimidine deoxyribonuleotide biosynthesis, CDP/CTP => dCDP/dCTP,dTDP/dTTP	MISC	Information systems
contig034153	vOTU012223	contig034153_8	K00558	DNA (cytosine-5-)-methyltransferase [EC:2.1.1.37] [RN:R04858]	contig034153-cat_1_8	contig034153-cat_1	2	M	Methionine degradation	Organic Nitrogen	Amino Acid
contig034182	vOTU012234	contig034182_15	GH13	GH13 alpha-amylase (EC 3.2.1.1); pullulanase (EC 3.2.1.41); cyclomaltodextrin glucanotransferase (EC 2.4.1.19); cyclomaltodextrinase (EC 3.2.1.54); trehalose-6-phosphate hydrolase (EC 3.2.1.93); oligo-alpha-glucosidase (EC 3.2.1.10); maltogenic amylase (EC 3.2.1.133); neopullulanase (EC 3.2.1.135); alpha-glucosidase (EC 3.2.1.20); maltotetraose-forming alpha-amylase (EC 3.2.1.60); isoamylase (EC …	contig034182-cat_1_15	contig034182-cat_1	2	MF	Glycoside Hydrolases	carbon utilization	CAZY
contig034187	vOTU051997	contig034187_38	K00789	S-adenosylmethionine synthetase [EC:2.5.1.6] [RN:R00177]	contig034187-cat_1_38	contig034187-cat_1	2	M	Cysteine biosynthesis, methionine => cysteine	Organic Nitrogen	Amino Acid
contig034187	vOTU051997	contig034187_38	K00789	S-adenosylmethionine synthetase [EC:2.5.1.6] [RN:R00177]	contig034187-cat_1_38	contig034187-cat_1	2	M	Methionine degradation	Organic Nitrogen	Amino Acid
contig034289	vOTU012278	contig034289_8	K00558	DNA (cytosine-5-)-methyltransferase [EC:2.1.1.37] [RN:R04858]	contig034289-cat_1_8	contig034289-cat_1	2	MF	Methionine degradation	Organic Nitrogen	Amino Acid
contig034373	vOTU012322	contig034373_8	K01520	dUTP pyrophosphatase [EC:3.6.1.23] [RN:R02100]	contig034373-cat_2_8	contig034373-cat_2	3	M	Pyrimidine deoxyribonuleotide biosynthesis, CDP/CTP => dCDP/dCTP,dTDP/dTTP	MISC	Information systems
contig034451	vOTU012363	contig034451_24	K01520	dUTP pyrophosphatase [EC:3.6.1.23] [RN:R02100]	contig034451-cat_1_24	contig034451-cat_1	2	M	Pyrimidine deoxyribonuleotide biosynthesis, CDP/CTP => dCDP/dCTP,dTDP/dTTP	MISC	Information systems
contig034610	vOTU012437	contig034610_157	K01520	dUTP pyrophosphatase [EC:3.6.1.23] [RN:R02100]	contig034610-cat_1_157	contig034610-cat_1	2	MF	Pyrimidine deoxyribonuleotide biosynthesis, CDP/CTP => dCDP/dCTP,dTDP/dTTP	MISC	Information systems
contig034640	vOTU012452	contig034640_27	K00525	ribonucleoside-diphosphate reductase [EC:1.17.4.1] [RN:R02024]	contig034640-cat_1_27	contig034640-cat_1	2	MKEF	Pyrimidine deoxyribonuleotide biosynthesis, CDP/CTP => dCDP/dCTP,dTDP/dTTP	MISC	Information systems
contig034766	vOTU012512	contig034766_17	K00558	DNA (cytosine-5-)-methyltransferase [EC:2.1.1.37] [RN:R04858]	contig034766-cat_1_17	contig034766-cat_1	2	M	Methionine degradation	Organic Nitrogen	Amino Acid
contig034766	vOTU012512	contig034766_19	K00789	S-adenosylmethionine synthetase [EC:2.5.1.6] [RN:R00177]	contig034766-cat_1_19	contig034766-cat_1	2	M	Cysteine biosynthesis, methionine => cysteine	Organic Nitrogen	Amino Acid
contig034766	vOTU012512	contig034766_19	K00789	S-adenosylmethionine synthetase [EC:2.5.1.6] [RN:R00177]	contig034766-cat_1_19	contig034766-cat_1	2	M	Methionine degradation	Organic Nitrogen	Amino Acid
contig034805	vOTU012544	contig034805_9	K00525	ribonucleoside-diphosphate reductase [EC:1.17.4.1] [RN:R02024]	contig034805-cat_1_9	contig034805-cat_1	2	MKEF	Pyrimidine deoxyribonuleotide biosynthesis, CDP/CTP => dCDP/dCTP,dTDP/dTTP	MISC	Information systems
contig034910	vOTU012612	contig034910_28	K00525	ribonucleoside-diphosphate reductase [EC:1.17.4.1] [RN:R02024]	contig034910-cat_1_28	contig034910-cat_1	2	MKE	Pyrimidine deoxyribonuleotide biosynthesis, CDP/CTP => dCDP/dCTP,dTDP/dTTP	MISC	Information systems
contig034946	vOTU012641	contig034946_28	K00558	DNA (cytosine-5-)-methyltransferase [EC:2.1.1.37] [RN:R04858]	contig034946-cat_1_28	contig034946-cat_1	2	M	Methionine degradation	Organic Nitrogen	Amino Acid
contig034946	vOTU012641	contig034946_30	K00789	S-adenosylmethionine synthetase [EC:2.5.1.6] [RN:R00177]	contig034946-cat_1_30	contig034946-cat_1	2	M	Cysteine biosynthesis, methionine => cysteine	Organic Nitrogen	Amino Acid
contig034946	vOTU012641	contig034946_30	K00789	S-adenosylmethionine synthetase [EC:2.5.1.6] [RN:R00177]	contig034946-cat_1_30	contig034946-cat_1	2	M	Methionine degradation	Organic Nitrogen	Amino Acid
contig034988	vOTU012672	contig034988_14	GT2	GT2 cellulose synthase (EC 2.4.1.12); chitin synthase (EC 2.4.1.16); dolichyl-phosphate beta-D-mannosyltransferase (EC 2.4.1.83); dolichyl-phosphate beta-glucosyltransferase (EC 2.4.1.117); N-acetylglucosaminyltransferase (EC 2.4.1.-); N-acetylgalactosaminyltransferase (EC 2.4.1.-); hyaluronan synthase (EC 2.4.1.212); chitin oligosaccharide synthase (EC 2.4.1.-); beta-1,3-glucan synthase (EC 2.4.…	contig034988-cat_1_14	contig034988-cat_1	1	M	GlycosylTransferases	carbon utilization	CAZY
contig035175	vOTU013918	contig035175_15	K00558	DNA (cytosine-5-)-methyltransferase [EC:2.1.1.37] [RN:R04858]	contig035175-cat_1_15	contig035175-cat_1	2	M	Methionine degradation	Organic Nitrogen	Amino Acid
contig035255	vOTU012791	contig035255_19	K00789	S-adenosylmethionine synthetase [EC:2.5.1.6] [RN:R00177]	contig035255-cat_1_19	contig035255-cat_1	2	M	Cysteine biosynthesis, methionine => cysteine	Organic Nitrogen	Amino Acid
contig035255	vOTU012791	contig035255_19	K00789	S-adenosylmethionine synthetase [EC:2.5.1.6] [RN:R00177]	contig035255-cat_1_19	contig035255-cat_1	2	M	Methionine degradation	Organic Nitrogen	Amino Acid
contig035296	vOTU012809	contig035296_51	K00558	DNA (cytosine-5-)-methyltransferase [EC:2.1.1.37] [RN:R04858]	contig035296-cat_1_51	contig035296-cat_1	2	MF	Methionine degradation	Organic Nitrogen	Amino Acid
contig035397	vOTU012845	contig035397_13	K00558	DNA (cytosine-5-)-methyltransferase [EC:2.1.1.37] [RN:R04858]	contig035397-cat_1_13	contig035397-cat_1	2	MF	Methionine degradation	Organic Nitrogen	Amino Acid
contig035413	vOTU013063	contig035413_17	K01494	dCTP deaminase [EC:3.5.4.13] [RN:R02325]	contig035413-cat_1_17	contig035413-cat_1	2	M	Pyrimidine deoxyribonuleotide biosynthesis, CDP/CTP => dCDP/dCTP,dTDP/dTTP	MISC	Information systems
contig035440	vOTU012861	contig035440_14	K01520	dUTP pyrophosphatase [EC:3.6.1.23] [RN:R02100]	contig035440-cat_1_14	contig035440-cat_1	2	M	Pyrimidine deoxyribonuleotide biosynthesis, CDP/CTP => dCDP/dCTP,dTDP/dTTP	MISC	Information systems
contig035449	vOTU012865	contig035449_2	K01520	dUTP pyrophosphatase [EC:3.6.1.23] [RN:R02100]	contig035449-cat_1_2	contig035449-cat_1	2	MF	Pyrimidine deoxyribonuleotide biosynthesis, CDP/CTP => dCDP/dCTP,dTDP/dTTP	MISC	Information systems
contig035540	vOTU012895	contig035540_17	K01520	dUTP pyrophosphatase [EC:3.6.1.23] [RN:R02100]	contig035540-cat_1_17	contig035540-cat_1	2	M	Pyrimidine deoxyribonuleotide biosynthesis, CDP/CTP => dCDP/dCTP,dTDP/dTTP	MISC	Information systems
contig035722	vOTU012955	contig035722_2	K00558	DNA (cytosine-5-)-methyltransferase [EC:2.1.1.37] [RN:R04858]	contig035722-cat_1_2	contig035722-cat_1	2	MF	Methionine degradation	Organic Nitrogen	Amino Acid
contig035872	vOTU013007	contig035872_17	K00560	thymidylate synthase [EC:2.1.1.45] [RN:R02101]	contig035872-cat_1_17	contig035872-cat_1	2	M	Pyrimidine deoxyribonuleotide biosynthesis, CDP/CTP => dCDP/dCTP,dTDP/dTTP	MISC	Information systems
contig035872	vOTU013007	contig035872_21	K01520	dUTP pyrophosphatase [EC:3.6.1.23] [RN:R02100]	contig035872-cat_1_21	contig035872-cat_1	2	M	Pyrimidine deoxyribonuleotide biosynthesis, CDP/CTP => dCDP/dCTP,dTDP/dTTP	MISC	Information systems
contig035905	vOTU013019	contig035905_27	K01520	dUTP pyrophosphatase [EC:3.6.1.23] [RN:R02100]	contig035905-cat_1_27	contig035905-cat_1	2	M	Pyrimidine deoxyribonuleotide biosynthesis, CDP/CTP => dCDP/dCTP,dTDP/dTTP	MISC	Information systems
contig035921	vOTU013022	contig035921_43	K01939	adenylosuccinate synthase [EC:6.3.4.4] [RN:R01135]	contig035921-cat_1_43	contig035921-cat_1	2	M	Adenine ribonucleotide biosynthesis, IMP => ADP,ATP	MISC	Information systems
contig035979	vOTU013047	contig035979_66	K21636	ribonucleoside-triphosphate reductase [EC:1.17.4.2 1.1.98.6] [RN:R02022 R11636]	contig035979-cat_1_66	contig035979-cat_1	2	M	Pyrimidine deoxyribonuleotide biosynthesis, CDP/CTP => dCDP/dCTP,dTDP/dTTP	MISC	Information systems
contig035979	vOTU013047	contig035979_70	K21636	ribonucleoside-triphosphate reductase [EC:1.17.4.2 1.1.98.6] [RN:R02022 R11636]	contig035979-cat_1_70	contig035979-cat_1	2	M	Pyrimidine deoxyribonuleotide biosynthesis, CDP/CTP => dCDP/dCTP,dTDP/dTTP	MISC	Information systems
contig035979	vOTU013047	contig035979_76	K01520	dUTP pyrophosphatase [EC:3.6.1.23] [RN:R02100]	contig035979-cat_1_76	contig035979-cat_1	2	M	Pyrimidine deoxyribonuleotide biosynthesis, CDP/CTP => dCDP/dCTP,dTDP/dTTP	MISC	Information systems
contig036009	vOTU013058	contig036009_39	K00560	thymidylate synthase [EC:2.1.1.45] [RN:R02101]	contig036009-cat_1_39	contig036009-cat_1	2	M	Pyrimidine deoxyribonuleotide biosynthesis, CDP/CTP => dCDP/dCTP,dTDP/dTTP	MISC	Information systems
contig036077	vOTU013087	contig036077_27	K00558	DNA (cytosine-5-)-methyltransferase [EC:2.1.1.37] [RN:R04858]	contig036077-cat_1_27	contig036077-cat_1	2	M	Methionine degradation	Organic Nitrogen	Amino Acid
contig036115	vOTU013101	contig036115_39	K21636	ribonucleoside-triphosphate reductase [EC:1.17.4.2 1.1.98.6] [RN:R02022 R11636]	contig036115-cat_2_39	contig036115-cat_2	3	M	Pyrimidine deoxyribonuleotide biosynthesis, CDP/CTP => dCDP/dCTP,dTDP/dTTP	MISC	Information systems
contig036115	vOTU013101	contig036115_47	K01520	dUTP pyrophosphatase [EC:3.6.1.23] [RN:R02100]	contig036115-cat_2_47	contig036115-cat_2	3	M	Pyrimidine deoxyribonuleotide biosynthesis, CDP/CTP => dCDP/dCTP,dTDP/dTTP	MISC	Information systems
contig036115	vOTU013101	contig036115_49	K01520	dUTP pyrophosphatase [EC:3.6.1.23] [RN:R02100]	contig036115-cat_2_49	contig036115-cat_2	3	M	Pyrimidine deoxyribonuleotide biosynthesis, CDP/CTP => dCDP/dCTP,dTDP/dTTP	MISC	Information systems
contig036135	vOTU013110	contig036135_3	K21636	ribonucleoside-triphosphate reductase [EC:1.17.4.2 1.1.98.6] [RN:R02022 R11636]	contig036135-cat_1_3	contig036135-cat_1	2	MF	Pyrimidine deoxyribonuleotide biosynthesis, CDP/CTP => dCDP/dCTP,dTDP/dTTP	MISC	Information systems
contig036198	vOTU013132	contig036198_32	K01939	adenylosuccinate synthase [EC:6.3.4.4] [RN:R01135]	contig036198-cat_2_32	contig036198-cat_2	3	M	Adenine ribonucleotide biosynthesis, IMP => ADP,ATP	MISC	Information systems
contig036198	vOTU013132	contig036198_95	K21636	ribonucleoside-triphosphate reductase [EC:1.17.4.2 1.1.98.6] [RN:R02022 R11636]	contig036198-cat_2_95	contig036198-cat_2	3	M	Pyrimidine deoxyribonuleotide biosynthesis, CDP/CTP => dCDP/dCTP,dTDP/dTTP	MISC	Information systems
contig036198	vOTU013132	contig036198_101	K01520	dUTP pyrophosphatase [EC:3.6.1.23] [RN:R02100]	contig036198-cat_2_101	contig036198-cat_2	3	M	Pyrimidine deoxyribonuleotide biosynthesis, CDP/CTP => dCDP/dCTP,dTDP/dTTP	MISC	Information systems
contig036283	vOTU013171	contig036283_5	K00558	DNA (cytosine-5-)-methyltransferase [EC:2.1.1.37] [RN:R04858]	contig036283-cat_1_5	contig036283-cat_1	2	MF	Methionine degradation	Organic Nitrogen	Amino Acid
contig036311	vOTU013183	contig036311_4	K01939	adenylosuccinate synthase [EC:6.3.4.4] [RN:R01135]	contig036311-cat_1_4	contig036311-cat_1	2	MF	Adenine ribonucleotide biosynthesis, IMP => ADP,ATP	MISC	Information systems
contig036386	vOTU013213	contig036386_30	K01520	dUTP pyrophosphatase [EC:3.6.1.23] [RN:R02100]	contig036386-cat_1_30	contig036386-cat_1	2	MF	Pyrimidine deoxyribonuleotide biosynthesis, CDP/CTP => dCDP/dCTP,dTDP/dTTP	MISC	Information systems
contig036404	vOTU013225	contig036404_4	K00558	DNA (cytosine-5-)-methyltransferase [EC:2.1.1.37] [RN:R04858]	contig036404-cat_1_4	contig036404-cat_1	2	MF	Methionine degradation	Organic Nitrogen	Amino Acid
contig036415	vOTU013229	contig036415_53	K01520	dUTP pyrophosphatase [EC:3.6.1.23] [RN:R02100]	contig036415-cat_1_53	contig036415-cat_1	2	MF	Pyrimidine deoxyribonuleotide biosynthesis, CDP/CTP => dCDP/dCTP,dTDP/dTTP	MISC	Information systems
contig036436	vOTU013235	contig036436_110	K21636	ribonucleoside-triphosphate reductase [EC:1.17.4.2 1.1.98.6] [RN:R02022 R11636]	contig036436-cat_2_110	contig036436-cat_2	3	MF	Pyrimidine deoxyribonuleotide biosynthesis, CDP/CTP => dCDP/dCTP,dTDP/dTTP	MISC	Information systems
contig036436	vOTU013235	contig036436_112	K01520	dUTP pyrophosphatase [EC:3.6.1.23] [RN:R02100]	contig036436-cat_2_112	contig036436-cat_2	3	MF	Pyrimidine deoxyribonuleotide biosynthesis, CDP/CTP => dCDP/dCTP,dTDP/dTTP	MISC	Information systems
contig036499	vOTU013255	contig036499_37	K21636	ribonucleoside-triphosphate reductase [EC:1.17.4.2 1.1.98.6] [RN:R02022 R11636]	contig036499-cat_1_37	contig036499-cat_1	2	MF	Pyrimidine deoxyribonuleotide biosynthesis, CDP/CTP => dCDP/dCTP,dTDP/dTTP	MISC	Information systems
contig036533	vOTU013269	contig036533_10	K00560	thymidylate synthase [EC:2.1.1.45] [RN:R02101]	contig036533-cat_1_10	contig036533-cat_1	2	MF	Pyrimidine deoxyribonuleotide biosynthesis, CDP/CTP => dCDP/dCTP,dTDP/dTTP	MISC	Information systems
contig036645	vOTU013310	contig036645_51	K01520	dUTP pyrophosphatase [EC:3.6.1.23] [RN:R02100]	contig036645-cat_1_51	contig036645-cat_1	2	M	Pyrimidine deoxyribonuleotide biosynthesis, CDP/CTP => dCDP/dCTP,dTDP/dTTP	MISC	Information systems
contig036663	vOTU013317	contig036663_25	K21636	ribonucleoside-triphosphate reductase [EC:1.17.4.2 1.1.98.6] [RN:R02022 R11636]	contig036663-cat_1_25	contig036663-cat_1	1	M	Pyrimidine deoxyribonuleotide biosynthesis, CDP/CTP => dCDP/dCTP,dTDP/dTTP	MISC	Information systems
contig036663	vOTU013317	contig036663_27	K21636	ribonucleoside-triphosphate reductase [EC:1.17.4.2 1.1.98.6] [RN:R02022 R11636]	contig036663-cat_1_27	contig036663-cat_1	1	M	Pyrimidine deoxyribonuleotide biosynthesis, CDP/CTP => dCDP/dCTP,dTDP/dTTP	MISC	Information systems
contig036724	vOTU013341	contig036724_8	K21636	ribonucleoside-triphosphate reductase [EC:1.17.4.2 1.1.98.6] [RN:R02022 R11636]	contig036724-cat_2_8	contig036724-cat_2	3	MF	Pyrimidine deoxyribonuleotide biosynthesis, CDP/CTP => dCDP/dCTP,dTDP/dTTP	MISC	Information systems
contig036745	vOTU013351	contig036745_9	K01520	dUTP pyrophosphatase [EC:3.6.1.23] [RN:R02100]	contig036745-cat_1_9	contig036745-cat_1	2	M	Pyrimidine deoxyribonuleotide biosynthesis, CDP/CTP => dCDP/dCTP,dTDP/dTTP	MISC	Information systems
contig036808	vOTU013374	contig036808_57	K21636	ribonucleoside-triphosphate reductase [EC:1.17.4.2 1.1.98.6] [RN:R02022 R11636]	contig036808-cat_2_57	contig036808-cat_2	3	MF	Pyrimidine deoxyribonuleotide biosynthesis, CDP/CTP => dCDP/dCTP,dTDP/dTTP	MISC	Information systems
contig036869	vOTU013397	contig036869_23	K00558	DNA (cytosine-5-)-methyltransferase [EC:2.1.1.37] [RN:R04858]	contig036869-cat_1_23	contig036869-cat_1	2	MF	Methionine degradation	Organic Nitrogen	Amino Acid
contig036869	vOTU013397	contig036869_25	K00789	S-adenosylmethionine synthetase [EC:2.5.1.6] [RN:R00177]	contig036869-cat_1_25	contig036869-cat_1	2	MF	Cysteine biosynthesis, methionine => cysteine	Organic Nitrogen	Amino Acid
contig036869	vOTU013397	contig036869_25	K00789	S-adenosylmethionine synthetase [EC:2.5.1.6] [RN:R00177]	contig036869-cat_1_25	contig036869-cat_1	2	MF	Methionine degradation	Organic Nitrogen	Amino Acid
contig036942	vOTU013424	contig036942_30	K21636	ribonucleoside-triphosphate reductase [EC:1.17.4.2 1.1.98.6] [RN:R02022 R11636]	contig036942-cat_1_30	contig036942-cat_1	1	M	Pyrimidine deoxyribonuleotide biosynthesis, CDP/CTP => dCDP/dCTP,dTDP/dTTP	MISC	Information systems
contig036942	vOTU013424	contig036942_63	K01520	dUTP pyrophosphatase [EC:3.6.1.23] [RN:R02100]	contig036942-cat_1_63	contig036942-cat_1	2	M	Pyrimidine deoxyribonuleotide biosynthesis, CDP/CTP => dCDP/dCTP,dTDP/dTTP	MISC	Information systems
contig036942	vOTU013424	contig036942_111	K00558	DNA (cytosine-5-)-methyltransferase [EC:2.1.1.37] [RN:R04858]	contig036942-cat_1_111	contig036942-cat_1	2	M	Methionine degradation	Organic Nitrogen	Amino Acid
contig037002	vOTU013454	contig037002_40	K00558	DNA (cytosine-5-)-methyltransferase [EC:2.1.1.37] [RN:R04858]	contig037002-cat_1_40	contig037002-cat_1	2	MF	Methionine degradation	Organic Nitrogen	Amino Acid
contig037081	vOTU013492	contig037081_24	K01494	dCTP deaminase [EC:3.5.4.13] [RN:R02325]	contig037081-cat_1_24	contig037081-cat_1	2	M	Pyrimidine deoxyribonuleotide biosynthesis, CDP/CTP => dCDP/dCTP,dTDP/dTTP	MISC	Information systems
contig037092	vOTU013498	contig037092_21	K00558	DNA (cytosine-5-)-methyltransferase [EC:2.1.1.37] [RN:R04858]	contig037092-cat_2_21	contig037092-cat_2	3	MF	Methionine degradation	Organic Nitrogen	Amino Acid
contig037092	vOTU013498	contig037092_22	K01520	dUTP pyrophosphatase [EC:3.6.1.23] [RN:R02100]	contig037092-cat_2_22	contig037092-cat_2	3	MF	Pyrimidine deoxyribonuleotide biosynthesis, CDP/CTP => dCDP/dCTP,dTDP/dTTP	MISC	Information systems
contig037094	vOTU013499	contig037094_46	K00560	thymidylate synthase [EC:2.1.1.45] [RN:R02101]	contig037094-cat_1_46	contig037094-cat_1	1	M	Pyrimidine deoxyribonuleotide biosynthesis, CDP/CTP => dCDP/dCTP,dTDP/dTTP	MISC	Information systems
contig037259	vOTU013547	contig037259_12	K00558	DNA (cytosine-5-)-methyltransferase [EC:2.1.1.37] [RN:R04858]	contig037259-cat_1_12	contig037259-cat_1	2	MF	Methionine degradation	Organic Nitrogen	Amino Acid
contig037259	vOTU013547	contig037259_14	K00789	S-adenosylmethionine synthetase [EC:2.5.1.6] [RN:R00177]	contig037259-cat_1_14	contig037259-cat_1	2	MF	Cysteine biosynthesis, methionine => cysteine	Organic Nitrogen	Amino Acid
contig037259	vOTU013547	contig037259_14	K00789	S-adenosylmethionine synthetase [EC:2.5.1.6] [RN:R00177]	contig037259-cat_1_14	contig037259-cat_1	2	MF	Methionine degradation	Organic Nitrogen	Amino Acid
contig037401	vOTU013593	contig037401_46	K00558	DNA (cytosine-5-)-methyltransferase [EC:2.1.1.37] [RN:R04858]	contig037401-cat_1_46	contig037401-cat_1	2	MF	Methionine degradation	Organic Nitrogen	Amino Acid
contig037466	vOTU013625	contig037466_7	K01520	dUTP pyrophosphatase [EC:3.6.1.23] [RN:R02100]	contig037466-cat_2_7	contig037466-cat_2	3	MF	Pyrimidine deoxyribonuleotide biosynthesis, CDP/CTP => dCDP/dCTP,dTDP/dTTP	MISC	Information systems
contig037583	vOTU013677	contig037583_25	K01520	dUTP pyrophosphatase [EC:3.6.1.23] [RN:R02100]	contig037583-cat_1_25	contig037583-cat_1	2	M	Pyrimidine deoxyribonuleotide biosynthesis, CDP/CTP => dCDP/dCTP,dTDP/dTTP	MISC	Information systems
contig037677	vOTU013718	contig037677_16	K21636	ribonucleoside-triphosphate reductase [EC:1.17.4.2 1.1.98.6] [RN:R02022 R11636]	contig037677-cat_2_16	contig037677-cat_2	3	M	Pyrimidine deoxyribonuleotide biosynthesis, CDP/CTP => dCDP/dCTP,dTDP/dTTP	MISC	Information systems
contig037677	vOTU013718	contig037677_19	K01520	dUTP pyrophosphatase [EC:3.6.1.23] [RN:R02100]	contig037677-cat_2_19	contig037677-cat_2	3	M	Pyrimidine deoxyribonuleotide biosynthesis, CDP/CTP => dCDP/dCTP,dTDP/dTTP	MISC	Information systems
contig037866	vOTU013803	contig037866_22	K09882	cobS; cobaltochelatase CobS [EC:6.6.1.2]	contig037866-cat_1_22	contig037866-cat_1	2	M	Cobalamin biosynthesis, precorrin2 => cobinamide	MISC	aerobic corrin ring synthesis
contig037866	vOTU013803	contig037866_23	K09883	cobT; cobaltochelatase CobT [EC:6.6.1.2]	contig037866-cat_1_23	contig037866-cat_1	2	M	Cobalamin biosynthesis, precorrin2 => cobinamide	MISC	aerobic corrin ring synthesis
contig037869	vOTU013805	contig037869_37	K21636	ribonucleoside-triphosphate reductase [EC:1.17.4.2 1.1.98.6] [RN:R02022 R11636]	contig037869-cat_1_37	contig037869-cat_1	1	M	Pyrimidine deoxyribonuleotide biosynthesis, CDP/CTP => dCDP/dCTP,dTDP/dTTP	MISC	Information systems
contig037922	vOTU013829	contig037922_11	K01520	dUTP pyrophosphatase [EC:3.6.1.23] [RN:R02100]	contig037922-cat_1_11	contig037922-cat_1	2	MF	Pyrimidine deoxyribonuleotide biosynthesis, CDP/CTP => dCDP/dCTP,dTDP/dTTP	MISC	Information systems
contig037944	vOTU013840	contig037944_14	K00558	DNA (cytosine-5-)-methyltransferase [EC:2.1.1.37] [RN:R04858]	contig037944-cat_1_14	contig037944-cat_1	2	M	Methionine degradation	Organic Nitrogen	Amino Acid
contig037950	vOTU013843	contig037950_64	K00525	ribonucleoside-diphosphate reductase [EC:1.17.4.1] [RN:R02024]	contig037950-cat_1_64	contig037950-cat_1	1	MKE	Pyrimidine deoxyribonuleotide biosynthesis, CDP/CTP => dCDP/dCTP,dTDP/dTTP	MISC	Information systems
contig037964	vOTU013850	contig037964_26	K01784	GALE; UDP-Glc -> UDP-Gal [EC:5.1.3.2]	contig037964-cat_1_26	contig037964-cat_1	2	MF	Nucleotide sugar biosynthesis, eukaryotes	MISC	Information systems
contig037964	vOTU013850	contig037964_26	K01784	UDP-glucose 4-epimerase [EC:5.1.3.2] [RN:R00291]	contig037964-cat_1_26	contig037964-cat_1	2	MF	Galactose degradation, Leloir pathway, galactose => alpha-D-glucose-1P	carbon utilization	central carbon
contig037964	vOTU013850	contig037964_26	K01784	UDP-glucose 4-epimerase	contig037964-cat_1_26	contig037964-cat_1	2	MF	Galactose metabolism	carbon utilization (Woodcroft)	sugar utilization (woodcroft)
contig037994	vOTU013863	contig037994_26	K01520	dUTP pyrophosphatase [EC:3.6.1.23] [RN:R02100]	contig037994-cat_1_26	contig037994-cat_1	2	M	Pyrimidine deoxyribonuleotide biosynthesis, CDP/CTP => dCDP/dCTP,dTDP/dTTP	MISC	Information systems
contig037994	vOTU013863	contig037994_29	K21636	ribonucleoside-triphosphate reductase [EC:1.17.4.2 1.1.98.6] [RN:R02022 R11636]	contig037994-cat_1_29	contig037994-cat_1	2	M	Pyrimidine deoxyribonuleotide biosynthesis, CDP/CTP => dCDP/dCTP,dTDP/dTTP	MISC	Information systems
contig038045	vOTU013891	contig038045_9	M26	Catlytic type: Metallo; cleaves the heavy chain of human IgA1 at the Pro227-Thr228 bond; tightly associated with the bacterial cell surface	contig038045-cat_1_9	contig038045-cat_1	1	M	Endopeptidases	Organic Nitrogen	Peptidase
contig038045	vOTU013891	contig038045_20	K01494	dCTP deaminase [EC:3.5.4.13] [RN:R02325]	contig038045-cat_1_20	contig038045-cat_1	1	M	Pyrimidine deoxyribonuleotide biosynthesis, CDP/CTP => dCDP/dCTP,dTDP/dTTP	MISC	Information systems
contig038045	vOTU013891	contig038045_40	K00560	thymidylate synthase [EC:2.1.1.45] [RN:R02101]	contig038045-cat_1_40	contig038045-cat_1	2	M	Pyrimidine deoxyribonuleotide biosynthesis, CDP/CTP => dCDP/dCTP,dTDP/dTTP	MISC	Information systems
contig038050	vOTU013893	contig038050_36	K21636	ribonucleoside-triphosphate reductase [EC:1.17.4.2 1.1.98.6] [RN:R02022 R11636]	contig038050-cat_2_36	contig038050-cat_2	3	M	Pyrimidine deoxyribonuleotide biosynthesis, CDP/CTP => dCDP/dCTP,dTDP/dTTP	MISC	Information systems
contig038076	vOTU013901	contig038076_46	K01520	dUTP pyrophosphatase [EC:3.6.1.23] [RN:R02100]	contig038076-cat_1_46	contig038076-cat_1	2	MF	Pyrimidine deoxyribonuleotide biosynthesis, CDP/CTP => dCDP/dCTP,dTDP/dTTP	MISC	Information systems
contig038182	vOTU013933	contig038182_26	K00558	DNA (cytosine-5-)-methyltransferase [EC:2.1.1.37] [RN:R04858]	contig038182-cat_1_26	contig038182-cat_1	2	M	Methionine degradation	Organic Nitrogen	Amino Acid
contig038275	vOTU013968	contig038275_27	K01520	dUTP pyrophosphatase [EC:3.6.1.23] [RN:R02100]	contig038275-cat_1_27	contig038275-cat_1	2	M	Pyrimidine deoxyribonuleotide biosynthesis, CDP/CTP => dCDP/dCTP,dTDP/dTTP	MISC	Information systems
contig038290	vOTU013971	contig038290_11	K01520	dUTP pyrophosphatase [EC:3.6.1.23] [RN:R02100]	contig038290-cat_1_11	contig038290-cat_1	2	MF	Pyrimidine deoxyribonuleotide biosynthesis, CDP/CTP => dCDP/dCTP,dTDP/dTTP	MISC	Information systems
contig038375	vOTU014004	contig038375_15	K00525	ribonucleoside-diphosphate reductase [EC:1.17.4.1] [RN:R02024]	contig038375-cat_1_15	contig038375-cat_1	1	MKE	Pyrimidine deoxyribonuleotide biosynthesis, CDP/CTP => dCDP/dCTP,dTDP/dTTP	MISC	Information systems
contig038448	vOTU014033	contig038448_26	K00558	DNA (cytosine-5-)-methyltransferase [EC:2.1.1.37] [RN:R04858]	contig038448-cat_2_26	contig038448-cat_2	3	MF	Methionine degradation	Organic Nitrogen	Amino Acid
contig038549	vOTU014066	contig038549_55	K01520	dUTP pyrophosphatase [EC:3.6.1.23] [RN:R02100]	contig038549-cat_2_55	contig038549-cat_2	3	MF	Pyrimidine deoxyribonuleotide biosynthesis, CDP/CTP => dCDP/dCTP,dTDP/dTTP	MISC	Information systems
contig038573	vOTU014074	contig038573_6	K00789	S-adenosylmethionine synthetase [EC:2.5.1.6] [RN:R00177]	contig038573-cat_1_6	contig038573-cat_1	2	MF	Cysteine biosynthesis, methionine => cysteine	Organic Nitrogen	Amino Acid
contig038573	vOTU014074	contig038573_6	K00789	S-adenosylmethionine synthetase [EC:2.5.1.6] [RN:R00177]	contig038573-cat_1_6	contig038573-cat_1	2	MF	Methionine degradation	Organic Nitrogen	Amino Acid
contig038653	vOTU014101	contig038653_15	K00789	S-adenosylmethionine synthetase [EC:2.5.1.6] [RN:R00177]	contig038653-cat_2_15	contig038653-cat_2	3	MF	Cysteine biosynthesis, methionine => cysteine	Organic Nitrogen	Amino Acid
contig038653	vOTU014101	contig038653_15	K00789	S-adenosylmethionine synthetase [EC:2.5.1.6] [RN:R00177]	contig038653-cat_2_15	contig038653-cat_2	3	MF	Methionine degradation	Organic Nitrogen	Amino Acid
contig038665	vOTU014105	contig038665_25	K00525	ribonucleoside-diphosphate reductase [EC:1.17.4.1] [RN:R02024]	contig038665-cat_1_25	contig038665-cat_1	2	MKE	Pyrimidine deoxyribonuleotide biosynthesis, CDP/CTP => dCDP/dCTP,dTDP/dTTP	MISC	Information systems
contig038665	vOTU014105	contig038665_27	K01520	dUTP pyrophosphatase [EC:3.6.1.23] [RN:R02100]	contig038665-cat_1_27	contig038665-cat_1	2	M	Pyrimidine deoxyribonuleotide biosynthesis, CDP/CTP => dCDP/dCTP,dTDP/dTTP	MISC	Information systems
contig038702	vOTU014120	contig038702_14	K01520	dUTP pyrophosphatase [EC:3.6.1.23] [RN:R02100]	contig038702-cat_1_14	contig038702-cat_1	2	MF	Pyrimidine deoxyribonuleotide biosynthesis, CDP/CTP => dCDP/dCTP,dTDP/dTTP	MISC	Information systems
contig038733	vOTU014133	contig038733_26	K01520	dUTP pyrophosphatase [EC:3.6.1.23] [RN:R02100]	contig038733-cat_1_26	contig038733-cat_1	1	M	Pyrimidine deoxyribonuleotide biosynthesis, CDP/CTP => dCDP/dCTP,dTDP/dTTP	MISC	Information systems
contig038884	vOTU014194	contig038884_13	K01520	dUTP pyrophosphatase [EC:3.6.1.23] [RN:R02100]	contig038884-cat_1_13	contig038884-cat_1	2	M	Pyrimidine deoxyribonuleotide biosynthesis, CDP/CTP => dCDP/dCTP,dTDP/dTTP	MISC	Information systems
contig038967	vOTU014230	contig038967_16	K00558	DNA (cytosine-5-)-methyltransferase [EC:2.1.1.37] [RN:R04858]	contig038967-cat_1_16	contig038967-cat_1	2	M	Methionine degradation	Organic Nitrogen	Amino Acid
contig039109	vOTU014274	contig039109_5	K00558	DNA (cytosine-5-)-methyltransferase [EC:2.1.1.37] [RN:R04858]	contig039109-cat_1_5	contig039109-cat_1	2	MF	Methionine degradation	Organic Nitrogen	Amino Acid
contig039117	vOTU014278	contig039117_10	K00558	DNA (cytosine-5-)-methyltransferase [EC:2.1.1.37] [RN:R04858]	contig039117-cat_2_10	contig039117-cat_2	3	MF	Methionine degradation	Organic Nitrogen	Amino Acid
contig039143	vOTU014287	contig039143_93	K01520	dUTP pyrophosphatase [EC:3.6.1.23] [RN:R02100]	contig039143-cat_1_93	contig039143-cat_1	1	M	Pyrimidine deoxyribonuleotide biosynthesis, CDP/CTP => dCDP/dCTP,dTDP/dTTP	MISC	Information systems
contig039203	vOTU014313	contig039203_48	K00558	DNA (cytosine-5-)-methyltransferase [EC:2.1.1.37] [RN:R04858]	contig039203-cat_1_48	contig039203-cat_1	2	M	Methionine degradation	Organic Nitrogen	Amino Acid
contig039219	vOTU126225	contig039219_39	K00558	DNA (cytosine-5-)-methyltransferase [EC:2.1.1.37] [RN:R04858]	contig039219-cat_1_39	contig039219-cat_1	2	MF	Methionine degradation	Organic Nitrogen	Amino Acid
contig039360	vOTU014368	contig039360_65	K00560	thymidylate synthase [EC:2.1.1.45] [RN:R02101]	contig039360-cat_1_65	contig039360-cat_1	2	M	Pyrimidine deoxyribonuleotide biosynthesis, CDP/CTP => dCDP/dCTP,dTDP/dTTP	MISC	Information systems
contig039432	vOTU014385	contig039432_36	K01520	dUTP pyrophosphatase [EC:3.6.1.23] [RN:R02100]	contig039432-cat_1_36	contig039432-cat_1	2	M	Pyrimidine deoxyribonuleotide biosynthesis, CDP/CTP => dCDP/dCTP,dTDP/dTTP	MISC	Information systems
contig039432	vOTU014385	contig039432_39	K21636	ribonucleoside-triphosphate reductase [EC:1.17.4.2 1.1.98.6] [RN:R02022 R11636]	contig039432-cat_1_39	contig039432-cat_1	2	M	Pyrimidine deoxyribonuleotide biosynthesis, CDP/CTP => dCDP/dCTP,dTDP/dTTP	MISC	Information systems
contig039432	vOTU014385	contig039432_72	K01939	adenylosuccinate synthase [EC:6.3.4.4] [RN:R01135]	contig039432-cat_1_72	contig039432-cat_1	1	M	Adenine ribonucleotide biosynthesis, IMP => ADP,ATP	MISC	Information systems
contig039452	vOTU014396	contig039452_11	K00558	DNA (cytosine-5-)-methyltransferase [EC:2.1.1.37] [RN:R04858]	contig039452-cat_2_11	contig039452-cat_2	3	MF	Methionine degradation	Organic Nitrogen	Amino Acid
contig039542	vOTU014416	contig039542_14	K00558	DNA (cytosine-5-)-methyltransferase [EC:2.1.1.37] [RN:R04858]	contig039542-cat_1_14	contig039542-cat_1	1	M	Methionine degradation	Organic Nitrogen	Amino Acid
contig039542	vOTU014416	contig039542_34	K00558	DNA (cytosine-5-)-methyltransferase [EC:2.1.1.37] [RN:R04858]	contig039542-cat_1_34	contig039542-cat_1	2	MF	Methionine degradation	Organic Nitrogen	Amino Acid
contig039543	vOTU014417	contig039543_40	K01520	dUTP pyrophosphatase [EC:3.6.1.23] [RN:R02100]	contig039543-cat_1_40	contig039543-cat_1	2	MF	Pyrimidine deoxyribonuleotide biosynthesis, CDP/CTP => dCDP/dCTP,dTDP/dTTP	MISC	Information systems
contig039543	vOTU014417	contig039543_42	K21636	ribonucleoside-triphosphate reductase [EC:1.17.4.2 1.1.98.6] [RN:R02022 R11636]	contig039543-cat_1_42	contig039543-cat_1	2	MF	Pyrimidine deoxyribonuleotide biosynthesis, CDP/CTP => dCDP/dCTP,dTDP/dTTP	MISC	Information systems
contig039813	vOTU014486	contig039813_10	K00558	DNA (cytosine-5-)-methyltransferase [EC:2.1.1.37] [RN:R04858]	contig039813-cat_1_10	contig039813-cat_1	2	MF	Methionine degradation	Organic Nitrogen	Amino Acid
contig039813	vOTU014486	contig039813_12	K00789	S-adenosylmethionine synthetase [EC:2.5.1.6] [RN:R00177]	contig039813-cat_1_12	contig039813-cat_1	2	MF	Cysteine biosynthesis, methionine => cysteine	Organic Nitrogen	Amino Acid
contig039813	vOTU014486	contig039813_12	K00789	S-adenosylmethionine synthetase [EC:2.5.1.6] [RN:R00177]	contig039813-cat_1_12	contig039813-cat_1	2	MF	Methionine degradation	Organic Nitrogen	Amino Acid
contig039913	vOTU014524	contig039913_5	K00558	DNA (cytosine-5-)-methyltransferase [EC:2.1.1.37] [RN:R04858]	contig039913-cat_1_5	contig039913-cat_1	2	MF	Methionine degradation	Organic Nitrogen	Amino Acid
contig040015	vOTU014561	contig040015_46	K01520	dUTP pyrophosphatase [EC:3.6.1.23] [RN:R02100]	contig040015-cat_1_46	contig040015-cat_1	2	MF	Pyrimidine deoxyribonuleotide biosynthesis, CDP/CTP => dCDP/dCTP,dTDP/dTTP	MISC	Information systems
contig040017	vOTU014562	contig040017_3	K21636	ribonucleoside-triphosphate reductase [EC:1.17.4.2 1.1.98.6] [RN:R02022 R11636]	contig040017-cat_1_3	contig040017-cat_1	2	MF	Pyrimidine deoxyribonuleotide biosynthesis, CDP/CTP => dCDP/dCTP,dTDP/dTTP	MISC	Information systems
contig040017	vOTU014562	contig040017_12	K01520	dUTP pyrophosphatase [EC:3.6.1.23] [RN:R02100]	contig040017-cat_1_12	contig040017-cat_1	2	M	Pyrimidine deoxyribonuleotide biosynthesis, CDP/CTP => dCDP/dCTP,dTDP/dTTP	MISC	Information systems
contig040112	vOTU014614	contig040112_3	K01491	methylenetetrahydrofolate dehydrogenase (NADP+) / methenyltetrahydrofolate cyclohydrolase [EC:1.5.1.5 3.5.4.9] [RN:R01655 R01220]	contig040112-cat_1_3	contig040112-cat_1	2	MF	Reductive acetyl-CoA pathway (Wood-Ljungdahl pathway)	Energy	C1
contig040112	vOTU014614	contig040112_21	K21636	ribonucleoside-triphosphate reductase [EC:1.17.4.2 1.1.98.6] [RN:R02022 R11636]	contig040112-cat_1_21	contig040112-cat_1	2	M	Pyrimidine deoxyribonuleotide biosynthesis, CDP/CTP => dCDP/dCTP,dTDP/dTTP	MISC	Information systems
contig040112	vOTU014614	contig040112_24	K21636	ribonucleoside-triphosphate reductase [EC:1.17.4.2 1.1.98.6] [RN:R02022 R11636]	contig040112-cat_1_24	contig040112-cat_1	2	M	Pyrimidine deoxyribonuleotide biosynthesis, CDP/CTP => dCDP/dCTP,dTDP/dTTP	MISC	Information systems
contig040112	vOTU014614	contig040112_29	K01520	dUTP pyrophosphatase [EC:3.6.1.23] [RN:R02100]	contig040112-cat_1_29	contig040112-cat_1	2	M	Pyrimidine deoxyribonuleotide biosynthesis, CDP/CTP => dCDP/dCTP,dTDP/dTTP	MISC	Information systems
contig040128	vOTU014624	contig040128_6	K01520	dUTP pyrophosphatase [EC:3.6.1.23] [RN:R02100]	contig040128-cat_2_6	contig040128-cat_2	3	MF	Pyrimidine deoxyribonuleotide biosynthesis, CDP/CTP => dCDP/dCTP,dTDP/dTTP	MISC	Information systems
contig040191	vOTU014659	contig040191_57	K00558	DNA (cytosine-5-)-methyltransferase [EC:2.1.1.37] [RN:R04858]	contig040191-cat_1_57	contig040191-cat_1	2	MF	Methionine degradation	Organic Nitrogen	Amino Acid
contig040196	vOTU014663	contig040196_35	K00789	S-adenosylmethionine synthetase [EC:2.5.1.6] [RN:R00177]	contig040196-cat_1_35	contig040196-cat_1	2	M	Cysteine biosynthesis, methionine => cysteine	Organic Nitrogen	Amino Acid
contig040196	vOTU014663	contig040196_35	K00789	S-adenosylmethionine synthetase [EC:2.5.1.6] [RN:R00177]	contig040196-cat_1_35	contig040196-cat_1	2	M	Methionine degradation	Organic Nitrogen	Amino Acid
contig040207	vOTU014672	contig040207_20	K01520	dUTP pyrophosphatase [EC:3.6.1.23] [RN:R02100]	contig040207-cat_2_20	contig040207-cat_2	3	MF	Pyrimidine deoxyribonuleotide biosynthesis, CDP/CTP => dCDP/dCTP,dTDP/dTTP	MISC	Information systems
contig040224	vOTU121189	contig040224_24	K00560	thymidylate synthase [EC:2.1.1.45] [RN:R02101]	contig040224-cat_1_24	contig040224-cat_1	1	M	Pyrimidine deoxyribonuleotide biosynthesis, CDP/CTP => dCDP/dCTP,dTDP/dTTP	MISC	Information systems
contig040224	vOTU121189	contig040224_80	K01520	dUTP pyrophosphatase [EC:3.6.1.23] [RN:R02100]	contig040224-cat_1_80	contig040224-cat_1	1	M	Pyrimidine deoxyribonuleotide biosynthesis, CDP/CTP => dCDP/dCTP,dTDP/dTTP	MISC	Information systems
contig040237	vOTU014693	contig040237_35	K00558	DNA (cytosine-5-)-methyltransferase [EC:2.1.1.37] [RN:R04858]	contig040237-cat_1_35	contig040237-cat_1	1	M	Methionine degradation	Organic Nitrogen	Amino Acid
contig040239	vOTU014695	contig040239_24	K00558	DNA (cytosine-5-)-methyltransferase [EC:2.1.1.37] [RN:R04858]	contig040239-cat_1_24	contig040239-cat_1	2	M	Methionine degradation	Organic Nitrogen	Amino Acid
contig040291	vOTU014730	contig040291_13	K01520	dUTP pyrophosphatase [EC:3.6.1.23] [RN:R02100]	contig040291-cat_1_13	contig040291-cat_1	2	M	Pyrimidine deoxyribonuleotide biosynthesis, CDP/CTP => dCDP/dCTP,dTDP/dTTP	MISC	Information systems
contig040291	vOTU014730	contig040291_19	K00558	DNA (cytosine-5-)-methyltransferase [EC:2.1.1.37] [RN:R04858]	contig040291-cat_1_19	contig040291-cat_1	2	M	Methionine degradation	Organic Nitrogen	Amino Acid
contig040466	vOTU014839	contig040466_11	K21636	ribonucleoside-triphosphate reductase [EC:1.17.4.2 1.1.98.6] [RN:R02022 R11636]	contig040466-cat_1_11	contig040466-cat_1	1	M	Pyrimidine deoxyribonuleotide biosynthesis, CDP/CTP => dCDP/dCTP,dTDP/dTTP	MISC	Information systems
contig040466	vOTU014839	contig040466_13	K21636	ribonucleoside-triphosphate reductase [EC:1.17.4.2 1.1.98.6] [RN:R02022 R11636]	contig040466-cat_1_13	contig040466-cat_1	1	M	Pyrimidine deoxyribonuleotide biosynthesis, CDP/CTP => dCDP/dCTP,dTDP/dTTP	MISC	Information systems
contig040468	vOTU014841	contig040468_63	K21636	ribonucleoside-triphosphate reductase [EC:1.17.4.2 1.1.98.6] [RN:R02022 R11636]	contig040468-cat_1_63	contig040468-cat_1	2	M	Pyrimidine deoxyribonuleotide biosynthesis, CDP/CTP => dCDP/dCTP,dTDP/dTTP	MISC	Information systems
contig040468	vOTU014841	contig040468_64	K01494	dCTP deaminase [EC:3.5.4.13] [RN:R02325]	contig040468-cat_1_64	contig040468-cat_1	2	M	Pyrimidine deoxyribonuleotide biosynthesis, CDP/CTP => dCDP/dCTP,dTDP/dTTP	MISC	Information systems
contig040491	vOTU014854	contig040491_128	K21636	ribonucleoside-triphosphate reductase [EC:1.17.4.2 1.1.98.6] [RN:R02022 R11636]	contig040491-cat_1_128	contig040491-cat_1	2	MF	Pyrimidine deoxyribonuleotide biosynthesis, CDP/CTP => dCDP/dCTP,dTDP/dTTP	MISC	Information systems
contig040492	vOTU014855	contig040492_23	K01520	dUTP pyrophosphatase [EC:3.6.1.23] [RN:R02100]	contig040492-cat_1_23	contig040492-cat_1	1	M	Pyrimidine deoxyribonuleotide biosynthesis, CDP/CTP => dCDP/dCTP,dTDP/dTTP	MISC	Information systems
contig040524	vOTU014872	contig040524_123	K01520	dUTP pyrophosphatase [EC:3.6.1.23] [RN:R02100]	contig040524-cat_1_123	contig040524-cat_1	2	M	Pyrimidine deoxyribonuleotide biosynthesis, CDP/CTP => dCDP/dCTP,dTDP/dTTP	MISC	Information systems
contig040524	vOTU014872	contig040524_128	K21636	ribonucleoside-triphosphate reductase [EC:1.17.4.2 1.1.98.6] [RN:R02022 R11636]	contig040524-cat_1_128	contig040524-cat_1	2	M	Pyrimidine deoxyribonuleotide biosynthesis, CDP/CTP => dCDP/dCTP,dTDP/dTTP	MISC	Information systems
contig040661	vOTU014952	contig040661_17	K00558	DNA (cytosine-5-)-methyltransferase [EC:2.1.1.37] [RN:R04858]	contig040661-cat_1_17	contig040661-cat_1	2	M	Methionine degradation	Organic Nitrogen	Amino Acid
contig040661	vOTU014952	contig040661_87	K01494	dCTP deaminase [EC:3.5.4.13] [RN:R02325]	contig040661-cat_1_87	contig040661-cat_1	2	MF	Pyrimidine deoxyribonuleotide biosynthesis, CDP/CTP => dCDP/dCTP,dTDP/dTTP	MISC	Information systems
contig040697	vOTU014970	contig040697_28	K00558	DNA (cytosine-5-)-methyltransferase [EC:2.1.1.37] [RN:R04858]	contig040697-cat_1_28	contig040697-cat_1	2	MF	Methionine degradation	Organic Nitrogen	Amino Acid
contig040823	vOTU015039	contig040823_44	K01520	dUTP pyrophosphatase [EC:3.6.1.23] [RN:R02100]	contig040823-cat_2_44	contig040823-cat_2	3	M	Pyrimidine deoxyribonuleotide biosynthesis, CDP/CTP => dCDP/dCTP,dTDP/dTTP	MISC	Information systems
contig040864	vOTU015062	contig040864_20	K00558	DNA (cytosine-5-)-methyltransferase [EC:2.1.1.37] [RN:R04858]	contig040864-cat_1_20	contig040864-cat_1	2	M	Methionine degradation	Organic Nitrogen	Amino Acid
contig040865	vOTU015063	contig040865_6	K01520	dUTP pyrophosphatase [EC:3.6.1.23] [RN:R02100]	contig040865-cat_1_6	contig040865-cat_1	2	MF	Pyrimidine deoxyribonuleotide biosynthesis, CDP/CTP => dCDP/dCTP,dTDP/dTTP	MISC	Information systems
contig040968	vOTU015124	contig040968_18	K01520	dUTP pyrophosphatase [EC:3.6.1.23] [RN:R02100]	contig040968-cat_1_18	contig040968-cat_1	1	M	Pyrimidine deoxyribonuleotide biosynthesis, CDP/CTP => dCDP/dCTP,dTDP/dTTP	MISC	Information systems
contig040989	vOTU015138	contig040989_24	K00558	DNA (cytosine-5-)-methyltransferase [EC:2.1.1.37] [RN:R04858]	contig040989-cat_1_24	contig040989-cat_1	2	M	Methionine degradation	Organic Nitrogen	Amino Acid
contig041069	vOTU015174	contig041069_3	K00558	DNA (cytosine-5-)-methyltransferase [EC:2.1.1.37] [RN:R04858]	contig041069-cat_1_3	contig041069-cat_1	2	MF	Methionine degradation	Organic Nitrogen	Amino Acid
contig041097	vOTU015190	contig041097_13	K00558	DNA (cytosine-5-)-methyltransferase [EC:2.1.1.37] [RN:R04858]	contig041097-cat_1_13	contig041097-cat_1	2	M	Methionine degradation	Organic Nitrogen	Amino Acid
contig041121	vOTU015200	contig041121_16	K00525	ribonucleoside-diphosphate reductase [EC:1.17.4.1] [RN:R02024]	contig041121-cat_2_16	contig041121-cat_2	3	MKE	Pyrimidine deoxyribonuleotide biosynthesis, CDP/CTP => dCDP/dCTP,dTDP/dTTP	MISC	Information systems
contig041121	vOTU015200	contig041121_18	K01520	dUTP pyrophosphatase [EC:3.6.1.23] [RN:R02100]	contig041121-cat_2_18	contig041121-cat_2	3	M	Pyrimidine deoxyribonuleotide biosynthesis, CDP/CTP => dCDP/dCTP,dTDP/dTTP	MISC	Information systems
contig041147	vOTU015214	contig041147_12	K00558	DNA (cytosine-5-)-methyltransferase [EC:2.1.1.37] [RN:R04858]	contig041147-cat_1_12	contig041147-cat_1	2	M	Methionine degradation	Organic Nitrogen	Amino Acid
contig041170	vOTU015224	contig041170_25	K01520	dUTP pyrophosphatase [EC:3.6.1.23] [RN:R02100]	contig041170-cat_1_25	contig041170-cat_1	2	M	Pyrimidine deoxyribonuleotide biosynthesis, CDP/CTP => dCDP/dCTP,dTDP/dTTP	MISC	Information systems
contig041182	vOTU015232	contig041182_19	K01520	dUTP pyrophosphatase [EC:3.6.1.23] [RN:R02100]	contig041182-cat_2_19	contig041182-cat_2	3	M	Pyrimidine deoxyribonuleotide biosynthesis, CDP/CTP => dCDP/dCTP,dTDP/dTTP	MISC	Information systems
contig041219	vOTU015250	contig041219_11	K00558	DNA (cytosine-5-)-methyltransferase [EC:2.1.1.37] [RN:R04858]	contig041219-cat_1_11	contig041219-cat_1	2	MF	Methionine degradation	Organic Nitrogen	Amino Acid
contig041254	vOTU015270	contig041254_16	K00558	DNA (cytosine-5-)-methyltransferase [EC:2.1.1.37] [RN:R04858]	contig041254-cat_1_16	contig041254-cat_1	2	M	Methionine degradation	Organic Nitrogen	Amino Acid
contig041254	vOTU015270	contig041254_26	K01520	dUTP pyrophosphatase [EC:3.6.1.23] [RN:R02100]	contig041254-cat_1_26	contig041254-cat_1	2	M	Pyrimidine deoxyribonuleotide biosynthesis, CDP/CTP => dCDP/dCTP,dTDP/dTTP	MISC	Information systems
contig041270	vOTU015281	contig041270_5	K00558	DNA (cytosine-5-)-methyltransferase [EC:2.1.1.37] [RN:R04858]	contig041270-cat_1_5	contig041270-cat_1	2	MF	Methionine degradation	Organic Nitrogen	Amino Acid
contig041329	vOTU015322	contig041329_4	K01520	dUTP pyrophosphatase [EC:3.6.1.23] [RN:R02100]	contig041329-cat_1_4	contig041329-cat_1	2	MF	Pyrimidine deoxyribonuleotide biosynthesis, CDP/CTP => dCDP/dCTP,dTDP/dTTP	MISC	Information systems
contig041347	vOTU015335	contig041347_17	K21636	ribonucleoside-triphosphate reductase [EC:1.17.4.2 1.1.98.6] [RN:R02022 R11636]	contig041347-cat_1_17	contig041347-cat_1	1	M	Pyrimidine deoxyribonuleotide biosynthesis, CDP/CTP => dCDP/dCTP,dTDP/dTTP	MISC	Information systems
contig041352	vOTU015339	contig041352_12	K01520	dUTP pyrophosphatase [EC:3.6.1.23] [RN:R02100]	contig041352-cat_1_12	contig041352-cat_1	1	M	Pyrimidine deoxyribonuleotide biosynthesis, CDP/CTP => dCDP/dCTP,dTDP/dTTP	MISC	Information systems
contig041352	vOTU015339	contig041352_26	K00558	DNA (cytosine-5-)-methyltransferase [EC:2.1.1.37] [RN:R04858]	contig041352-cat_1_26	contig041352-cat_1	1	M	Methionine degradation	Organic Nitrogen	Amino Acid
contig041354	vOTU015341	contig041354_34	K01520	dUTP pyrophosphatase [EC:3.6.1.23] [RN:R02100]	contig041354-cat_1_34	contig041354-cat_1	2	M	Pyrimidine deoxyribonuleotide biosynthesis, CDP/CTP => dCDP/dCTP,dTDP/dTTP	MISC	Information systems
contig041360	vOTU021296	contig041360_46	K00558	DNA (cytosine-5-)-methyltransferase [EC:2.1.1.37] [RN:R04858]	contig041360-cat_1_46	contig041360-cat_1	2	MF	Methionine degradation	Organic Nitrogen	Amino Acid
contig041360	vOTU021296	contig041360_48	K00558	DNA (cytosine-5-)-methyltransferase [EC:2.1.1.37] [RN:R04858]	contig041360-cat_1_48	contig041360-cat_1	2	MF	Methionine degradation	Organic Nitrogen	Amino Acid
contig041424	vOTU015384	contig041424_22	K01520	dUTP pyrophosphatase [EC:3.6.1.23] [RN:R02100]	contig041424-cat_1_22	contig041424-cat_1	2	M	Pyrimidine deoxyribonuleotide biosynthesis, CDP/CTP => dCDP/dCTP,dTDP/dTTP	MISC	Information systems
contig041463	vOTU015412	contig041463_25	K01494	dCTP deaminase [EC:3.5.4.13] [RN:R02325]	contig041463-cat_1_25	contig041463-cat_1	2	M	Pyrimidine deoxyribonuleotide biosynthesis, CDP/CTP => dCDP/dCTP,dTDP/dTTP	MISC	Information systems
contig041469	vOTU015416	contig041469_7	K21636	ribonucleoside-triphosphate reductase [EC:1.17.4.2 1.1.98.6] [RN:R02022 R11636]	contig041469-cat_1_7	contig041469-cat_1	2	MF	Pyrimidine deoxyribonuleotide biosynthesis, CDP/CTP => dCDP/dCTP,dTDP/dTTP	MISC	Information systems
contig041491	vOTU015430	contig041491_9	K01520	dUTP pyrophosphatase [EC:3.6.1.23] [RN:R02100]	contig041491-cat_1_9	contig041491-cat_1	1	M	Pyrimidine deoxyribonuleotide biosynthesis, CDP/CTP => dCDP/dCTP,dTDP/dTTP	MISC	Information systems
contig041492	vOTU015431	contig041492_52	K21636	ribonucleoside-triphosphate reductase [EC:1.17.4.2 1.1.98.6] [RN:R02022 R11636]	contig041492-cat_1_52	contig041492-cat_1	2	M	Pyrimidine deoxyribonuleotide biosynthesis, CDP/CTP => dCDP/dCTP,dTDP/dTTP	MISC	Information systems
contig041521	vOTU015448	contig041521_18	K01520	dUTP pyrophosphatase [EC:3.6.1.23] [RN:R02100]	contig041521-cat_1_18	contig041521-cat_1	1	M	Pyrimidine deoxyribonuleotide biosynthesis, CDP/CTP => dCDP/dCTP,dTDP/dTTP	MISC	Information systems
contig041534	vOTU015457	contig041534_19	K01520	dUTP pyrophosphatase [EC:3.6.1.23] [RN:R02100]	contig041534-cat_1_19	contig041534-cat_1	2	M	Pyrimidine deoxyribonuleotide biosynthesis, CDP/CTP => dCDP/dCTP,dTDP/dTTP	MISC	Information systems
contig041534	vOTU015457	contig041534_44	K21636	ribonucleoside-triphosphate reductase [EC:1.17.4.2 1.1.98.6] [RN:R02022 R11636]	contig041534-cat_1_44	contig041534-cat_1	2	M	Pyrimidine deoxyribonuleotide biosynthesis, CDP/CTP => dCDP/dCTP,dTDP/dTTP	MISC	Information systems
contig041706	vOTU015562	contig041706_13	K01494	dCTP deaminase [EC:3.5.4.13] [RN:R02325]	contig041706-cat_1_13	contig041706-cat_1	1	M	Pyrimidine deoxyribonuleotide biosynthesis, CDP/CTP => dCDP/dCTP,dTDP/dTTP	MISC	Information systems
contig041709	vOTU015565	contig041709_24	K00558	DNA (cytosine-5-)-methyltransferase [EC:2.1.1.37] [RN:R04858]	contig041709-cat_2_24	contig041709-cat_2	3	MF	Methionine degradation	Organic Nitrogen	Amino Acid
contig041720	vOTU015569	contig041720_6	K00558	DNA (cytosine-5-)-methyltransferase [EC:2.1.1.37] [RN:R04858]	contig041720-cat_1_6	contig041720-cat_1	2	MF	Methionine degradation	Organic Nitrogen	Amino Acid
contig041835	vOTU015636	contig041835_15	K00558	DNA (cytosine-5-)-methyltransferase [EC:2.1.1.37] [RN:R04858]	contig041835-cat_2_15	contig041835-cat_2	3	M	Methionine degradation	Organic Nitrogen	Amino Acid
contig041887	vOTU015669	contig041887_38	K00558	DNA (cytosine-5-)-methyltransferase [EC:2.1.1.37] [RN:R04858]	contig041887-cat_1_38	contig041887-cat_1	2	M	Methionine degradation	Organic Nitrogen	Amino Acid
contig041983	vOTU015725	contig041983_5	K00558	DNA (cytosine-5-)-methyltransferase [EC:2.1.1.37] [RN:R04858]	contig041983-cat_2_5	contig041983-cat_2	3	MF	Methionine degradation	Organic Nitrogen	Amino Acid
contig042221	vOTU015841	contig042221_24	K02050	ABC.SN.P; sulfonate/nitrate/taurine transport system permease protein	contig042221-cat_1_24	contig042221-cat_1	2	M	NitT/TauT family transport system	Transporters
contig042221	vOTU015841	contig042221_32	K01939	adenylosuccinate synthase [EC:6.3.4.4] [RN:R01135]	contig042221-cat_1_32	contig042221-cat_1	2	M	Adenine ribonucleotide biosynthesis, IMP => ADP,ATP	MISC	Information systems
contig042221	vOTU015841	contig042221_56	K01520	dUTP pyrophosphatase [EC:3.6.1.23] [RN:R02100]	contig042221-cat_1_56	contig042221-cat_1	2	M	Pyrimidine deoxyribonuleotide biosynthesis, CDP/CTP => dCDP/dCTP,dTDP/dTTP	MISC	Information systems
contig042301	vOTU015881	contig042301_54	K01520	dUTP pyrophosphatase [EC:3.6.1.23] [RN:R02100]	contig042301-cat_1_54	contig042301-cat_1	2	MF	Pyrimidine deoxyribonuleotide biosynthesis, CDP/CTP => dCDP/dCTP,dTDP/dTTP	MISC	Information systems
contig042310	vOTU015886	contig042310_3	K00789	S-adenosylmethionine synthetase [EC:2.5.1.6] [RN:R00177]	contig042310-cat_1_3	contig042310-cat_1	2	MF	Cysteine biosynthesis, methionine => cysteine	Organic Nitrogen	Amino Acid
contig042310	vOTU015886	contig042310_3	K00789	S-adenosylmethionine synthetase [EC:2.5.1.6] [RN:R00177]	contig042310-cat_1_3	contig042310-cat_1	2	MF	Methionine degradation	Organic Nitrogen	Amino Acid
contig042322	vOTU015895	contig042322_29	K21636	ribonucleoside-triphosphate reductase [EC:1.17.4.2 1.1.98.6] [RN:R02022 R11636]	contig042322-cat_1_29	contig042322-cat_1	2	MF	Pyrimidine deoxyribonuleotide biosynthesis, CDP/CTP => dCDP/dCTP,dTDP/dTTP	MISC	Information systems
contig042414	vOTU015949	contig042414_18	K21636	ribonucleoside-triphosphate reductase [EC:1.17.4.2 1.1.98.6] [RN:R02022 R11636]	contig042414-cat_1_18	contig042414-cat_1	2	M	Pyrimidine deoxyribonuleotide biosynthesis, CDP/CTP => dCDP/dCTP,dTDP/dTTP	MISC	Information systems
contig042457	vOTU138705	contig042457_30	K00789	S-adenosylmethionine synthetase [EC:2.5.1.6] [RN:R00177]	contig042457-cat_1_30	contig042457-cat_1	1	M	Cysteine biosynthesis, methionine => cysteine	Organic Nitrogen	Amino Acid
contig042457	vOTU138705	contig042457_30	K00789	S-adenosylmethionine synthetase [EC:2.5.1.6] [RN:R00177]	contig042457-cat_1_30	contig042457-cat_1	1	M	Methionine degradation	Organic Nitrogen	Amino Acid
contig042515	vOTU016019	contig042515_47	K01520	dUTP pyrophosphatase [EC:3.6.1.23] [RN:R02100]	contig042515-cat_1_47	contig042515-cat_1	2	M	Pyrimidine deoxyribonuleotide biosynthesis, CDP/CTP => dCDP/dCTP,dTDP/dTTP	MISC	Information systems
contig042515	vOTU016019	contig042515_48	K00525	ribonucleoside-diphosphate reductase [EC:1.17.4.1] [RN:R02024]	contig042515-cat_1_48	contig042515-cat_1	2	MKE	Pyrimidine deoxyribonuleotide biosynthesis, CDP/CTP => dCDP/dCTP,dTDP/dTTP	MISC	Information systems
contig042522	vOTU016026	contig042522_30	K00558	DNA (cytosine-5-)-methyltransferase [EC:2.1.1.37] [RN:R04858]	contig042522-cat_1_30	contig042522-cat_1	1	M	Methionine degradation	Organic Nitrogen	Amino Acid
contig042528	vOTU016031	contig042528_44	K01494	dCTP deaminase [EC:3.5.4.13] [RN:R02325]	contig042528-cat_1_44	contig042528-cat_1	2	M	Pyrimidine deoxyribonuleotide biosynthesis, CDP/CTP => dCDP/dCTP,dTDP/dTTP	MISC	Information systems
contig042539	vOTU016038	contig042539_4	K01520	dUTP pyrophosphatase [EC:3.6.1.23] [RN:R02100]	contig042539-cat_1_4	contig042539-cat_1	2	MF	Pyrimidine deoxyribonuleotide biosynthesis, CDP/CTP => dCDP/dCTP,dTDP/dTTP	MISC	Information systems
contig042580	vOTU016066	contig042580_22	K01494	dCTP deaminase [EC:3.5.4.13] [RN:R02325]	contig042580-cat_1_22	contig042580-cat_1	2	MF	Pyrimidine deoxyribonuleotide biosynthesis, CDP/CTP => dCDP/dCTP,dTDP/dTTP	MISC	Information systems
contig042587	vOTU016071	contig042587_31	K00558	DNA (cytosine-5-)-methyltransferase [EC:2.1.1.37] [RN:R04858]	contig042587-cat_1_31	contig042587-cat_1	1	M	Methionine degradation	Organic Nitrogen	Amino Acid
contig042617	vOTU016090	contig042617_44	K00789	S-adenosylmethionine synthetase [EC:2.5.1.6] [RN:R00177]	contig042617-cat_1_44	contig042617-cat_1	2	MF	Cysteine biosynthesis, methionine => cysteine	Organic Nitrogen	Amino Acid
contig042617	vOTU016090	contig042617_44	K00789	S-adenosylmethionine synthetase [EC:2.5.1.6] [RN:R00177]	contig042617-cat_1_44	contig042617-cat_1	2	MF	Methionine degradation	Organic Nitrogen	Amino Acid
contig042699	vOTU016134	contig042699_7	K01494	dCTP deaminase [EC:3.5.4.13] [RN:R02325]	contig042699-cat_1_7	contig042699-cat_1	2	MF	Pyrimidine deoxyribonuleotide biosynthesis, CDP/CTP => dCDP/dCTP,dTDP/dTTP	MISC	Information systems
contig042759	vOTU016167	contig042759_30	K00525	ribonucleoside-diphosphate reductase [EC:1.17.4.1] [RN:R02024]	contig042759-cat_1_30	contig042759-cat_1	1	MKE	Pyrimidine deoxyribonuleotide biosynthesis, CDP/CTP => dCDP/dCTP,dTDP/dTTP	MISC	Information systems
contig042814	vOTU016194	contig042814_24	K01520	dUTP pyrophosphatase [EC:3.6.1.23] [RN:R02100]	contig042814-cat_1_24	contig042814-cat_1	1	M	Pyrimidine deoxyribonuleotide biosynthesis, CDP/CTP => dCDP/dCTP,dTDP/dTTP	MISC	Information systems
contig042822	vOTU016198	contig042822_29	K01520	dUTP pyrophosphatase [EC:3.6.1.23] [RN:R02100]	contig042822-cat_1_29	contig042822-cat_1	2	MF	Pyrimidine deoxyribonuleotide biosynthesis, CDP/CTP => dCDP/dCTP,dTDP/dTTP	MISC	Information systems
contig042834	vOTU016209	contig042834_37	K00525	ribonucleoside-diphosphate reductase [EC:1.17.4.1] [RN:R02024]	contig042834-cat_2_37	contig042834-cat_2	3	MKEF	Pyrimidine deoxyribonuleotide biosynthesis, CDP/CTP => dCDP/dCTP,dTDP/dTTP	MISC	Information systems
contig042834	vOTU016209	contig042834_39	K01520	dUTP pyrophosphatase [EC:3.6.1.23] [RN:R02100]	contig042834-cat_2_39	contig042834-cat_2	3	MF	Pyrimidine deoxyribonuleotide biosynthesis, CDP/CTP => dCDP/dCTP,dTDP/dTTP	MISC	Information systems
contig042845	vOTU016216	contig042845_49	K00525	ribonucleoside-diphosphate reductase [EC:1.17.4.1] [RN:R02024]	contig042845-cat_1_49	contig042845-cat_1	1	MKE	Pyrimidine deoxyribonuleotide biosynthesis, CDP/CTP => dCDP/dCTP,dTDP/dTTP	MISC	Information systems
contig042884	vOTU016239	contig042884_218	K21636	ribonucleoside-triphosphate reductase [EC:1.17.4.2 1.1.98.6] [RN:R02022 R11636]	contig042884-cat_1_218	contig042884-cat_1	1	M	Pyrimidine deoxyribonuleotide biosynthesis, CDP/CTP => dCDP/dCTP,dTDP/dTTP	MISC	Information systems
contig042908	vOTU016258	contig042908_34	K00937	polyphosphate kinase ???	contig042908-cat_1_34	contig042908-cat_1	2	M	Cytochrome d ubiquinol oxidase	Energy	Oxygen
contig042916	vOTU016264	contig042916_34	K01494	dCTP deaminase [EC:3.5.4.13] [RN:R02325]	contig042916-cat_1_34	contig042916-cat_1	1	M	Pyrimidine deoxyribonuleotide biosynthesis, CDP/CTP => dCDP/dCTP,dTDP/dTTP	MISC	Information systems
contig042919	vOTU016266	contig042919_163	K00558	DNA (cytosine-5-)-methyltransferase [EC:2.1.1.37] [RN:R04858]	contig042919-cat_1_163	contig042919-cat_1	2	M	Methionine degradation	Organic Nitrogen	Amino Acid
contig042938	vOTU016279	contig042938_20	K01520	dUTP pyrophosphatase [EC:3.6.1.23] [RN:R02100]	contig042938-cat_1_20	contig042938-cat_1	2	M	Pyrimidine deoxyribonuleotide biosynthesis, CDP/CTP => dCDP/dCTP,dTDP/dTTP	MISC	Information systems
contig042938	vOTU016279	contig042938_78	K01939	adenylosuccinate synthase [EC:6.3.4.4] [RN:R01135]	contig042938-cat_1_78	contig042938-cat_1	2	MF	Adenine ribonucleotide biosynthesis, IMP => ADP,ATP	MISC	Information systems
contig042966	vOTU016298	contig042966_20	K01494	dCTP deaminase [EC:3.5.4.13] [RN:R02325]	contig042966-cat_1_20	contig042966-cat_1	1	M	Pyrimidine deoxyribonuleotide biosynthesis, CDP/CTP => dCDP/dCTP,dTDP/dTTP	MISC	Information systems
contig043022	vOTU016332	contig043022_14	K01520	dUTP pyrophosphatase [EC:3.6.1.23] [RN:R02100]	contig043022-cat_1_14	contig043022-cat_1	2	M	Pyrimidine deoxyribonuleotide biosynthesis, CDP/CTP => dCDP/dCTP,dTDP/dTTP	MISC	Information systems
contig043022	vOTU016332	contig043022_85	K01494	dCTP deaminase [EC:3.5.4.13] [RN:R02325]	contig043022-cat_1_85	contig043022-cat_1	1	M	Pyrimidine deoxyribonuleotide biosynthesis, CDP/CTP => dCDP/dCTP,dTDP/dTTP	MISC	Information systems
contig043096	vOTU016382	contig043096_64	S51	Catlytic type: Serine; hydrolyses Asp-Xaa dipeptides in which Xaa is not Glu, Asn or Gln; nutritional function in bacteria	contig043096-cat_1_64	contig043096-cat_1	1	M	Exopeptidases that hydrolyse alpha-aspartyl bonds	Organic Nitrogen	Peptidase
contig043096	vOTU016382	contig043096_95	K01520	dUTP pyrophosphatase [EC:3.6.1.23] [RN:R02100]	contig043096-cat_1_95	contig043096-cat_1	1	M	Pyrimidine deoxyribonuleotide biosynthesis, CDP/CTP => dCDP/dCTP,dTDP/dTTP	MISC	Information systems
contig043096	vOTU016382	contig043096_99	K21636	ribonucleoside-triphosphate reductase [EC:1.17.4.2 1.1.98.6] [RN:R02022 R11636]	contig043096-cat_1_99	contig043096-cat_1	1	M	Pyrimidine deoxyribonuleotide biosynthesis, CDP/CTP => dCDP/dCTP,dTDP/dTTP	MISC	Information systems
contig043132	vOTU016412	contig043132_37	K01520	dUTP pyrophosphatase [EC:3.6.1.23] [RN:R02100]	contig043132-cat_1_37	contig043132-cat_1	2	M	Pyrimidine deoxyribonuleotide biosynthesis, CDP/CTP => dCDP/dCTP,dTDP/dTTP	MISC	Information systems
contig043156	vOTU016430	contig043156_55	K01520	dUTP pyrophosphatase [EC:3.6.1.23] [RN:R02100]	contig043156-cat_1_55	contig043156-cat_1	1	M	Pyrimidine deoxyribonuleotide biosynthesis, CDP/CTP => dCDP/dCTP,dTDP/dTTP	MISC	Information systems
contig043165	vOTU016435	contig043165_7	K00558	DNA (cytosine-5-)-methyltransferase [EC:2.1.1.37] [RN:R04858]	contig043165-cat_1_7	contig043165-cat_1	2	M	Methionine degradation	Organic Nitrogen	Amino Acid
contig043166	vOTU016436	contig043166_56	K21636	ribonucleoside-triphosphate reductase [EC:1.17.4.2 1.1.98.6] [RN:R02022 R11636]	contig043166-cat_1_56	contig043166-cat_1	1	M	Pyrimidine deoxyribonuleotide biosynthesis, CDP/CTP => dCDP/dCTP,dTDP/dTTP	MISC	Information systems
contig043166	vOTU016436	contig043166_65	K01520	dUTP pyrophosphatase [EC:3.6.1.23] [RN:R02100]	contig043166-cat_1_65	contig043166-cat_1	1	M	Pyrimidine deoxyribonuleotide biosynthesis, CDP/CTP => dCDP/dCTP,dTDP/dTTP	MISC	Information systems
contig043216	vOTU016466	contig043216_67	K00558	DNA (cytosine-5-)-methyltransferase [EC:2.1.1.37] [RN:R04858]	contig043216-cat_1_67	contig043216-cat_1	2	MF	Methionine degradation	Organic Nitrogen	Amino Acid
contig043228	vOTU016473	contig043228_83	K01520	dUTP pyrophosphatase [EC:3.6.1.23] [RN:R02100]	contig043228-cat_1_83	contig043228-cat_1	2	M	Pyrimidine deoxyribonuleotide biosynthesis, CDP/CTP => dCDP/dCTP,dTDP/dTTP	MISC	Information systems
contig043228	vOTU016473	contig043228_85	K21636	ribonucleoside-triphosphate reductase [EC:1.17.4.2 1.1.98.6] [RN:R02022 R11636]	contig043228-cat_1_85	contig043228-cat_1	2	M	Pyrimidine deoxyribonuleotide biosynthesis, CDP/CTP => dCDP/dCTP,dTDP/dTTP	MISC	Information systems
contig043261	vOTU016493	contig043261_40	K00560	thymidylate synthase [EC:2.1.1.45] [RN:R02101]	contig043261-cat_1_40	contig043261-cat_1	2	M	Pyrimidine deoxyribonuleotide biosynthesis, CDP/CTP => dCDP/dCTP,dTDP/dTTP	MISC	Information systems
contig043286	vOTU016511	contig043286_5	K01494	dCTP deaminase [EC:3.5.4.13] [RN:R02325]	contig043286-cat_2_5	contig043286-cat_2	3	MF	Pyrimidine deoxyribonuleotide biosynthesis, CDP/CTP => dCDP/dCTP,dTDP/dTTP	MISC	Information systems
contig043293	vOTU016517	contig043293_15	K01520	dUTP pyrophosphatase [EC:3.6.1.23] [RN:R02100]	contig043293-cat_1_15	contig043293-cat_1	2	M	Pyrimidine deoxyribonuleotide biosynthesis, CDP/CTP => dCDP/dCTP,dTDP/dTTP	MISC	Information systems
contig043303	vOTU016524	contig043303_49	K01520	dUTP pyrophosphatase [EC:3.6.1.23] [RN:R02100]	contig043303-cat_1_49	contig043303-cat_1	2	M	Pyrimidine deoxyribonuleotide biosynthesis, CDP/CTP => dCDP/dCTP,dTDP/dTTP	MISC	Information systems
contig043310	vOTU016529	contig043310_10	K01494	dCTP deaminase [EC:3.5.4.13] [RN:R02325]	contig043310-cat_1_10	contig043310-cat_1	2	MF	Pyrimidine deoxyribonuleotide biosynthesis, CDP/CTP => dCDP/dCTP,dTDP/dTTP	MISC	Information systems
contig043358	vOTU016557	contig043358_55	K21636	ribonucleoside-triphosphate reductase [EC:1.17.4.2 1.1.98.6] [RN:R02022 R11636]	contig043358-cat_1_55	contig043358-cat_1	1	M	Pyrimidine deoxyribonuleotide biosynthesis, CDP/CTP => dCDP/dCTP,dTDP/dTTP	MISC	Information systems
contig043358	vOTU016557	contig043358_64	K01520	dUTP pyrophosphatase [EC:3.6.1.23] [RN:R02100]	contig043358-cat_1_64	contig043358-cat_1	1	M	Pyrimidine deoxyribonuleotide biosynthesis, CDP/CTP => dCDP/dCTP,dTDP/dTTP	MISC	Information systems
contig043592	vOTU016622	contig043592_76	K01520	dUTP pyrophosphatase [EC:3.6.1.23] [RN:R02100]	contig043592-cat_1_76	contig043592-cat_1	1	M	Pyrimidine deoxyribonuleotide biosynthesis, CDP/CTP => dCDP/dCTP,dTDP/dTTP	MISC	Information systems
contig043592	vOTU016622	contig043592_109	K21636	ribonucleoside-triphosphate reductase [EC:1.17.4.2 1.1.98.6] [RN:R02022 R11636]	contig043592-cat_1_109	contig043592-cat_1	1	M	Pyrimidine deoxyribonuleotide biosynthesis, CDP/CTP => dCDP/dCTP,dTDP/dTTP	MISC	Information systems
contig043600	vOTU016625	contig043600_67	K01520	dUTP pyrophosphatase [EC:3.6.1.23] [RN:R02100]	contig043600-cat_1_67	contig043600-cat_1	2	M	Pyrimidine deoxyribonuleotide biosynthesis, CDP/CTP => dCDP/dCTP,dTDP/dTTP	MISC	Information systems
contig043618	vOTU016632	contig043618_36	K00558	DNA (cytosine-5-)-methyltransferase [EC:2.1.1.37] [RN:R04858]	contig043618-cat_1_36	contig043618-cat_1	1	M	Methionine degradation	Organic Nitrogen	Amino Acid
contig043622	vOTU016634	contig043622_30	K01520	dUTP pyrophosphatase [EC:3.6.1.23] [RN:R02100]	contig043622-cat_1_30	contig043622-cat_1	2	M	Pyrimidine deoxyribonuleotide biosynthesis, CDP/CTP => dCDP/dCTP,dTDP/dTTP	MISC	Information systems
contig043622	vOTU016634	contig043622_33	K00558	DNA (cytosine-5-)-methyltransferase [EC:2.1.1.37] [RN:R04858]	contig043622-cat_1_33	contig043622-cat_1	2	M	Methionine degradation	Organic Nitrogen	Amino Acid
contig043623	vOTU016635	contig043623_37	K00525	ribonucleoside-diphosphate reductase [EC:1.17.4.1] [RN:R02024]	contig043623-cat_1_37	contig043623-cat_1	1	MKE	Pyrimidine deoxyribonuleotide biosynthesis, CDP/CTP => dCDP/dCTP,dTDP/dTTP	MISC	Information systems
contig043628	vOTU016638	contig043628_23	K00558	DNA (cytosine-5-)-methyltransferase [EC:2.1.1.37] [RN:R04858]	contig043628-cat_1_23	contig043628-cat_1	2	MF	Methionine degradation	Organic Nitrogen	Amino Acid
contig043666	vOTU016650	contig043666_17	K21636	ribonucleoside-triphosphate reductase [EC:1.17.4.2 1.1.98.6] [RN:R02022 R11636]	contig043666-cat_1_17	contig043666-cat_1	2	M	Pyrimidine deoxyribonuleotide biosynthesis, CDP/CTP => dCDP/dCTP,dTDP/dTTP	MISC	Information systems
contig043671	vOTU016652	contig043671_175	K21636	ribonucleoside-triphosphate reductase [EC:1.17.4.2 1.1.98.6] [RN:R02022 R11636]	contig043671-cat_1_175	contig043671-cat_1	2	M	Pyrimidine deoxyribonuleotide biosynthesis, CDP/CTP => dCDP/dCTP,dTDP/dTTP	MISC	Information systems
contig043753	vOTU016682	contig043753_12	K01520	dUTP pyrophosphatase [EC:3.6.1.23] [RN:R02100]	contig043753-cat_1_12	contig043753-cat_1	2	M	Pyrimidine deoxyribonuleotide biosynthesis, CDP/CTP => dCDP/dCTP,dTDP/dTTP	MISC	Information systems
contig043757	vOTU016683	contig043757_42	K01520	dUTP pyrophosphatase [EC:3.6.1.23] [RN:R02100]	contig043757-cat_1_42	contig043757-cat_1	2	M	Pyrimidine deoxyribonuleotide biosynthesis, CDP/CTP => dCDP/dCTP,dTDP/dTTP	MISC	Information systems
contig043883	vOTU016721	contig043883_24	K00558	DNA (cytosine-5-)-methyltransferase [EC:2.1.1.37] [RN:R04858]	contig043883-cat_2_24	contig043883-cat_2	3	M	Methionine degradation	Organic Nitrogen	Amino Acid
contig043968	vOTU016742	contig043968_27	K00558	DNA (cytosine-5-)-methyltransferase [EC:2.1.1.37] [RN:R04858]	contig043968-cat_1_27	contig043968-cat_1	1	M	Methionine degradation	Organic Nitrogen	Amino Acid
contig043968	vOTU016742	contig043968_28	K00558	DNA (cytosine-5-)-methyltransferase [EC:2.1.1.37] [RN:R04858]	contig043968-cat_1_28	contig043968-cat_1	1	M	Methionine degradation	Organic Nitrogen	Amino Acid
contig044148	vOTU016782	contig044148_23	K00789	S-adenosylmethionine synthetase [EC:2.5.1.6] [RN:R00177]	contig044148-cat_1_23	contig044148-cat_1	2	M	Cysteine biosynthesis, methionine => cysteine	Organic Nitrogen	Amino Acid
contig044148	vOTU016782	contig044148_23	K00789	S-adenosylmethionine synthetase [EC:2.5.1.6] [RN:R00177]	contig044148-cat_1_23	contig044148-cat_1	2	M	Methionine degradation	Organic Nitrogen	Amino Acid
contig044148	vOTU016782	contig044148_25	K00558	DNA (cytosine-5-)-methyltransferase [EC:2.1.1.37] [RN:R04858]	contig044148-cat_1_25	contig044148-cat_1	2	M	Methionine degradation	Organic Nitrogen	Amino Acid
contig044376	vOTU003458	contig044376_63	K21636	ribonucleoside-triphosphate reductase [EC:1.17.4.2 1.1.98.6] [RN:R02022 R11636]	contig044376-cat_1_63	contig044376-cat_1	2	M	Pyrimidine deoxyribonuleotide biosynthesis, CDP/CTP => dCDP/dCTP,dTDP/dTTP	MISC	Information systems
contig044376	vOTU003458	contig044376_66	K21636	ribonucleoside-triphosphate reductase [EC:1.17.4.2 1.1.98.6] [RN:R02022 R11636]	contig044376-cat_1_66	contig044376-cat_1	2	M	Pyrimidine deoxyribonuleotide biosynthesis, CDP/CTP => dCDP/dCTP,dTDP/dTTP	MISC	Information systems
contig044376	vOTU003458	contig044376_72	K00558	DNA (cytosine-5-)-methyltransferase [EC:2.1.1.37] [RN:R04858]	contig044376-cat_1_72	contig044376-cat_1	2	M	Methionine degradation	Organic Nitrogen	Amino Acid
contig044376	vOTU003458	contig044376_87	K01520	dUTP pyrophosphatase [EC:3.6.1.23] [RN:R02100]	contig044376-cat_1_87	contig044376-cat_1	2	M	Pyrimidine deoxyribonuleotide biosynthesis, CDP/CTP => dCDP/dCTP,dTDP/dTTP	MISC	Information systems
contig044475	vOTU003491	contig044475_8	K00558	DNA (cytosine-5-)-methyltransferase [EC:2.1.1.37] [RN:R04858]	contig044475-cat_1_8	contig044475-cat_1	2	MF	Methionine degradation	Organic Nitrogen	Amino Acid
contig044475	vOTU003491	contig044475_9	K00558	DNA (cytosine-5-)-methyltransferase [EC:2.1.1.37] [RN:R04858]	contig044475-cat_1_9	contig044475-cat_1	2	MF	Methionine degradation	Organic Nitrogen	Amino Acid
contig044475	vOTU003491	contig044475_26	K00789	S-adenosylmethionine synthetase [EC:2.5.1.6] [RN:R00177]	contig044475-cat_1_26	contig044475-cat_1	2	M	Cysteine biosynthesis, methionine => cysteine	Organic Nitrogen	Amino Acid
contig044475	vOTU003491	contig044475_26	K00789	S-adenosylmethionine synthetase [EC:2.5.1.6] [RN:R00177]	contig044475-cat_1_26	contig044475-cat_1	2	M	Methionine degradation	Organic Nitrogen	Amino Acid
contig044475	vOTU003491	contig044475_30	K00558	DNA (cytosine-5-)-methyltransferase [EC:2.1.1.37] [RN:R04858]	contig044475-cat_1_30	contig044475-cat_1	2	M	Methionine degradation	Organic Nitrogen	Amino Acid
contig044660	vOTU016856	contig044660_19	K00558	DNA (cytosine-5-)-methyltransferase [EC:2.1.1.37] [RN:R04858]	contig044660-cat_1_19	contig044660-cat_1	1	M	Methionine degradation	Organic Nitrogen	Amino Acid
contig044691	vOTU016859	contig044691_7	K00558	DNA (cytosine-5-)-methyltransferase [EC:2.1.1.37] [RN:R04858]	contig044691-cat_1_7	contig044691-cat_1	1	MF	Methionine degradation	Organic Nitrogen	Amino Acid
contig044921	vOTU016977	contig044921_30	K01520	dUTP pyrophosphatase [EC:3.6.1.23] [RN:R02100]	contig044921-cat_1_30	contig044921-cat_1	2	M	Pyrimidine deoxyribonuleotide biosynthesis, CDP/CTP => dCDP/dCTP,dTDP/dTTP	MISC	Information systems
contig044921	vOTU016977	contig044921_56	K21636	ribonucleoside-triphosphate reductase [EC:1.17.4.2 1.1.98.6] [RN:R02022 R11636]	contig044921-cat_1_56	contig044921-cat_1	1	M	Pyrimidine deoxyribonuleotide biosynthesis, CDP/CTP => dCDP/dCTP,dTDP/dTTP	MISC	Information systems
contig044973	vOTU017000	contig044973_57	K00558	DNA (cytosine-5-)-methyltransferase [EC:2.1.1.37] [RN:R04858]	contig044973-cat_1_57	contig044973-cat_1	2	MF	Methionine degradation	Organic Nitrogen	Amino Acid
contig044987	vOTU017009	contig044987_15	K00558	DNA (cytosine-5-)-methyltransferase [EC:2.1.1.37] [RN:R04858]	contig044987-cat_1_15	contig044987-cat_1	2	M	Methionine degradation	Organic Nitrogen	Amino Acid
contig045069	vOTU017053	contig045069_58	K21636	ribonucleoside-triphosphate reductase [EC:1.17.4.2 1.1.98.6] [RN:R02022 R11636]	contig045069-cat_1_58	contig045069-cat_1	2	M	Pyrimidine deoxyribonuleotide biosynthesis, CDP/CTP => dCDP/dCTP,dTDP/dTTP	MISC	Information systems
contig045069	vOTU017053	contig045069_81	K00558	DNA (cytosine-5-)-methyltransferase [EC:2.1.1.37] [RN:R04858]	contig045069-cat_1_81	contig045069-cat_1	2	MF	Methionine degradation	Organic Nitrogen	Amino Acid
contig045100	vOTU017067	contig045100_10	K00558	DNA (cytosine-5-)-methyltransferase [EC:2.1.1.37] [RN:R04858]	contig045100-cat_2_10	contig045100-cat_2	3	MF	Methionine degradation	Organic Nitrogen	Amino Acid
contig045126	vOTU017083	contig045126_48	K00558	DNA (cytosine-5-)-methyltransferase [EC:2.1.1.37] [RN:R04858]	contig045126-cat_1_48	contig045126-cat_1	1	MF	Methionine degradation	Organic Nitrogen	Amino Acid
contig045131	vOTU017086	contig045131_41	K00525	ribonucleoside-diphosphate reductase [EC:1.17.4.1] [RN:R02024]	contig045131-cat_1_41	contig045131-cat_1	2	MKE	Pyrimidine deoxyribonuleotide biosynthesis, CDP/CTP => dCDP/dCTP,dTDP/dTTP	MISC	Information systems
contig045131	vOTU017086	contig045131_43	K01520	dUTP pyrophosphatase [EC:3.6.1.23] [RN:R02100]	contig045131-cat_1_43	contig045131-cat_1	2	M	Pyrimidine deoxyribonuleotide biosynthesis, CDP/CTP => dCDP/dCTP,dTDP/dTTP	MISC	Information systems
contig045143	vOTU017091	contig045143_51	K00558	DNA (cytosine-5-)-methyltransferase [EC:2.1.1.37] [RN:R04858]	contig045143-cat_1_51	contig045143-cat_1	2	MF	Methionine degradation	Organic Nitrogen	Amino Acid
contig045163	vOTU017105	contig045163_10	K01520	dUTP pyrophosphatase [EC:3.6.1.23] [RN:R02100]	contig045163-cat_1_10	contig045163-cat_1	2	M	Pyrimidine deoxyribonuleotide biosynthesis, CDP/CTP => dCDP/dCTP,dTDP/dTTP	MISC	Information systems
contig045163	vOTU017105	contig045163_15	K21636	ribonucleoside-triphosphate reductase [EC:1.17.4.2 1.1.98.6] [RN:R02022 R11636]	contig045163-cat_1_15	contig045163-cat_1	2	M	Pyrimidine deoxyribonuleotide biosynthesis, CDP/CTP => dCDP/dCTP,dTDP/dTTP	MISC	Information systems
contig045179	vOTU017119	contig045179_13	K21636	ribonucleoside-triphosphate reductase [EC:1.17.4.2 1.1.98.6] [RN:R02022 R11636]	contig045179-cat_1_13	contig045179-cat_1	2	M	Pyrimidine deoxyribonuleotide biosynthesis, CDP/CTP => dCDP/dCTP,dTDP/dTTP	MISC	Information systems
contig045187	vOTU017126	contig045187_61	K01520	dUTP pyrophosphatase [EC:3.6.1.23] [RN:R02100]	contig045187-cat_2_61	contig045187-cat_2	3	MF	Pyrimidine deoxyribonuleotide biosynthesis, CDP/CTP => dCDP/dCTP,dTDP/dTTP	MISC	Information systems
contig045222	vOTU017147	contig045222_68	K00558	DNA (cytosine-5-)-methyltransferase [EC:2.1.1.37] [RN:R04858]	contig045222-cat_1_68	contig045222-cat_1	2	M	Methionine degradation	Organic Nitrogen	Amino Acid
contig045223	vOTU017148	contig045223_66	K01520	dUTP pyrophosphatase [EC:3.6.1.23] [RN:R02100]	contig045223-cat_1_66	contig045223-cat_1	2	M	Pyrimidine deoxyribonuleotide biosynthesis, CDP/CTP => dCDP/dCTP,dTDP/dTTP	MISC	Information systems
contig045223	vOTU017148	contig045223_68	K00558	DNA (cytosine-5-)-methyltransferase [EC:2.1.1.37] [RN:R04858]	contig045223-cat_1_68	contig045223-cat_1	2	M	Methionine degradation	Organic Nitrogen	Amino Acid
contig045223	vOTU017148	contig045223_89	K21636	ribonucleoside-triphosphate reductase [EC:1.17.4.2 1.1.98.6] [RN:R02022 R11636]	contig045223-cat_1_89	contig045223-cat_1	2	M	Pyrimidine deoxyribonuleotide biosynthesis, CDP/CTP => dCDP/dCTP,dTDP/dTTP	MISC	Information systems
contig045223	vOTU017148	contig045223_130	K00789	S-adenosylmethionine synthetase [EC:2.5.1.6] [RN:R00177]	contig045223-cat_1_130	contig045223-cat_1	2	M	Cysteine biosynthesis, methionine => cysteine	Organic Nitrogen	Amino Acid
contig045223	vOTU017148	contig045223_130	K00789	S-adenosylmethionine synthetase [EC:2.5.1.6] [RN:R00177]	contig045223-cat_1_130	contig045223-cat_1	2	M	Methionine degradation	Organic Nitrogen	Amino Acid
contig045263	vOTU017171	contig045263_29	K01520	dUTP pyrophosphatase [EC:3.6.1.23] [RN:R02100]	contig045263-cat_1_29	contig045263-cat_1	2	M	Pyrimidine deoxyribonuleotide biosynthesis, CDP/CTP => dCDP/dCTP,dTDP/dTTP	MISC	Information systems
contig045303	vOTU017193	contig045303_59	K00558	DNA (cytosine-5-)-methyltransferase [EC:2.1.1.37] [RN:R04858]	contig045303-cat_1_59	contig045303-cat_1	2	MF	Methionine degradation	Organic Nitrogen	Amino Acid
contig045377	vOTU017234	contig045377_50	K01520	dUTP pyrophosphatase [EC:3.6.1.23] [RN:R02100]	contig045377-cat_1_50	contig045377-cat_1	2	M	Pyrimidine deoxyribonuleotide biosynthesis, CDP/CTP => dCDP/dCTP,dTDP/dTTP	MISC	Information systems
contig045382	vOTU017236	contig045382_43	K00789	S-adenosylmethionine synthetase [EC:2.5.1.6] [RN:R00177]	contig045382-cat_2_43	contig045382-cat_2	3	M	Cysteine biosynthesis, methionine => cysteine	Organic Nitrogen	Amino Acid
contig045382	vOTU017236	contig045382_43	K00789	S-adenosylmethionine synthetase [EC:2.5.1.6] [RN:R00177]	contig045382-cat_2_43	contig045382-cat_2	3	M	Methionine degradation	Organic Nitrogen	Amino Acid
contig045451	vOTU017276	contig045451_26	K00558	DNA (cytosine-5-)-methyltransferase [EC:2.1.1.37] [RN:R04858]	contig045451-cat_1_26	contig045451-cat_1	2	M	Methionine degradation	Organic Nitrogen	Amino Acid
contig045460	vOTU017284	contig045460_151	K00525	ribonucleoside-diphosphate reductase [EC:1.17.4.1] [RN:R02024]	contig045460-cat_1_151	contig045460-cat_1	2	MKE	Pyrimidine deoxyribonuleotide biosynthesis, CDP/CTP => dCDP/dCTP,dTDP/dTTP	MISC	Information systems
contig045460	vOTU017284	contig045460_156	K01520	dUTP pyrophosphatase [EC:3.6.1.23] [RN:R02100]	contig045460-cat_1_156	contig045460-cat_1	2	M	Pyrimidine deoxyribonuleotide biosynthesis, CDP/CTP => dCDP/dCTP,dTDP/dTTP	MISC	Information systems
contig045467	vOTU017289	contig045467_89	K00525	ribonucleoside-diphosphate reductase [EC:1.17.4.1] [RN:R02024]	contig045467-cat_1_89	contig045467-cat_1	1	MKE	Pyrimidine deoxyribonuleotide biosynthesis, CDP/CTP => dCDP/dCTP,dTDP/dTTP	MISC	Information systems
contig045471	vOTU017293	contig045471_23	K00558	DNA (cytosine-5-)-methyltransferase [EC:2.1.1.37] [RN:R04858]	contig045471-cat_1_23	contig045471-cat_1	2	M	Methionine degradation	Organic Nitrogen	Amino Acid
contig045472	vOTU017294	contig045472_80	K01520	dUTP pyrophosphatase [EC:3.6.1.23] [RN:R02100]	contig045472-cat_1_80	contig045472-cat_1	2	M	Pyrimidine deoxyribonuleotide biosynthesis, CDP/CTP => dCDP/dCTP,dTDP/dTTP	MISC	Information systems
contig045474	vOTU017295	contig045474_40	K01520	dUTP pyrophosphatase [EC:3.6.1.23] [RN:R02100]	contig045474-cat_1_40	contig045474-cat_1	2	M	Pyrimidine deoxyribonuleotide biosynthesis, CDP/CTP => dCDP/dCTP,dTDP/dTTP	MISC	Information systems
contig045479	vOTU017298	contig045479_69	K00558	DNA (cytosine-5-)-methyltransferase [EC:2.1.1.37] [RN:R04858]	contig045479-cat_1_69	contig045479-cat_1	2	M	Methionine degradation	Organic Nitrogen	Amino Acid
contig045490	vOTU017302	contig045490_47	K01520	dUTP pyrophosphatase [EC:3.6.1.23] [RN:R02100]	contig045490-cat_1_47	contig045490-cat_1	2	M	Pyrimidine deoxyribonuleotide biosynthesis, CDP/CTP => dCDP/dCTP,dTDP/dTTP	MISC	Information systems
contig045553	vOTU017332	contig045553_40	K01520	dUTP pyrophosphatase [EC:3.6.1.23] [RN:R02100]	contig045553-cat_1_40	contig045553-cat_1	2	M	Pyrimidine deoxyribonuleotide biosynthesis, CDP/CTP => dCDP/dCTP,dTDP/dTTP	MISC	Information systems
contig045561	vOTU017336	contig045561_38	GT2	GT2 cellulose synthase (EC 2.4.1.12); chitin synthase (EC 2.4.1.16); dolichyl-phosphate beta-D-mannosyltransferase (EC 2.4.1.83); dolichyl-phosphate beta-glucosyltransferase (EC 2.4.1.117); N-acetylglucosaminyltransferase (EC 2.4.1.-); N-acetylgalactosaminyltransferase (EC 2.4.1.-); hyaluronan synthase (EC 2.4.1.212); chitin oligosaccharide synthase (EC 2.4.1.-); beta-1,3-glucan synthase (EC 2.4.…	contig045561-cat_1_38	contig045561-cat_1	2	MF	GlycosylTransferases	carbon utilization	CAZY
contig045563	vOTU017338	contig045563_13	K00558	DNA (cytosine-5-)-methyltransferase [EC:2.1.1.37] [RN:R04858]	contig045563-cat_1_13	contig045563-cat_1	2	MF	Methionine degradation	Organic Nitrogen	Amino Acid
contig045603	vOTU017359	contig045603_55	K00558	DNA (cytosine-5-)-methyltransferase [EC:2.1.1.37] [RN:R04858]	contig045603-cat_1_55	contig045603-cat_1	2	M	Methionine degradation	Organic Nitrogen	Amino Acid
contig045603	vOTU017359	contig045603_57	K01520	dUTP pyrophosphatase [EC:3.6.1.23] [RN:R02100]	contig045603-cat_1_57	contig045603-cat_1	2	MF	Pyrimidine deoxyribonuleotide biosynthesis, CDP/CTP => dCDP/dCTP,dTDP/dTTP	MISC	Information systems
contig045604	vOTU017360	contig045604_10	K01939	adenylosuccinate synthase [EC:6.3.4.4] [RN:R01135]	contig045604-cat_2_10	contig045604-cat_2	3	M	Adenine ribonucleotide biosynthesis, IMP => ADP,ATP	MISC	Information systems
contig045634	vOTU017380	contig045634_70	K01520	dUTP pyrophosphatase [EC:3.6.1.23] [RN:R02100]	contig045634-cat_1_70	contig045634-cat_1	2	M	Pyrimidine deoxyribonuleotide biosynthesis, CDP/CTP => dCDP/dCTP,dTDP/dTTP	MISC	Information systems
contig045634	vOTU017380	contig045634_86	K01939	adenylosuccinate synthase [EC:6.3.4.4] [RN:R01135]	contig045634-cat_1_86	contig045634-cat_1	2	M	Adenine ribonucleotide biosynthesis, IMP => ADP,ATP	MISC	Information systems
contig045666	vOTU017397	contig045666_38	K00558	DNA (cytosine-5-)-methyltransferase [EC:2.1.1.37] [RN:R04858]	contig045666-cat_1_38	contig045666-cat_1	2	M	Methionine degradation	Organic Nitrogen	Amino Acid
contig045798	vOTU017482	contig045798_74	K01520	dUTP pyrophosphatase [EC:3.6.1.23] [RN:R02100]	contig045798-cat_1_74	contig045798-cat_1	2	M	Pyrimidine deoxyribonuleotide biosynthesis, CDP/CTP => dCDP/dCTP,dTDP/dTTP	MISC	Information systems
contig045798	vOTU017482	contig045798_79	K21636	ribonucleoside-triphosphate reductase [EC:1.17.4.2 1.1.98.6] [RN:R02022 R11636]	contig045798-cat_1_79	contig045798-cat_1	2	M	Pyrimidine deoxyribonuleotide biosynthesis, CDP/CTP => dCDP/dCTP,dTDP/dTTP	MISC	Information systems
contig045798	vOTU017482	contig045798_80	K21636	ribonucleoside-triphosphate reductase [EC:1.17.4.2 1.1.98.6] [RN:R02022 R11636]	contig045798-cat_1_80	contig045798-cat_1	2	M	Pyrimidine deoxyribonuleotide biosynthesis, CDP/CTP => dCDP/dCTP,dTDP/dTTP	MISC	Information systems
contig045806	vOTU017488	contig045806_50	K00558	DNA (cytosine-5-)-methyltransferase [EC:2.1.1.37] [RN:R04858]	contig045806-cat_1_50	contig045806-cat_1	2	MF	Methionine degradation	Organic Nitrogen	Amino Acid
contig045847	vOTU017509	contig045847_66	K21636	ribonucleoside-triphosphate reductase [EC:1.17.4.2 1.1.98.6] [RN:R02022 R11636]	contig045847-cat_1_66	contig045847-cat_1	2	M	Pyrimidine deoxyribonuleotide biosynthesis, CDP/CTP => dCDP/dCTP,dTDP/dTTP	MISC	Information systems
contig045847	vOTU017509	contig045847_69	K21636	ribonucleoside-triphosphate reductase [EC:1.17.4.2 1.1.98.6] [RN:R02022 R11636]	contig045847-cat_1_69	contig045847-cat_1	2	M	Pyrimidine deoxyribonuleotide biosynthesis, CDP/CTP => dCDP/dCTP,dTDP/dTTP	MISC	Information systems
contig045932	vOTU017562	contig045932_34	K00558	DNA (cytosine-5-)-methyltransferase [EC:2.1.1.37] [RN:R04858]	contig045932-cat_1_34	contig045932-cat_1	1	M	Methionine degradation	Organic Nitrogen	Amino Acid
contig045937	vOTU017566	contig045937_25	K00558	DNA (cytosine-5-)-methyltransferase [EC:2.1.1.37] [RN:R04858]	contig045937-cat_1_25	contig045937-cat_1	1	M	Methionine degradation	Organic Nitrogen	Amino Acid
contig045968	vOTU017586	contig045968_99	GT2	GT2 cellulose synthase (EC 2.4.1.12); chitin synthase (EC 2.4.1.16); dolichyl-phosphate beta-D-mannosyltransferase (EC 2.4.1.83); dolichyl-phosphate beta-glucosyltransferase (EC 2.4.1.117); N-acetylglucosaminyltransferase (EC 2.4.1.-); N-acetylgalactosaminyltransferase (EC 2.4.1.-); hyaluronan synthase (EC 2.4.1.212); chitin oligosaccharide synthase (EC 2.4.1.-); beta-1,3-glucan synthase (EC 2.4.…	contig045968-cat_1_99	contig045968-cat_1	1	M	GlycosylTransferases	carbon utilization	CAZY
contig045968	vOTU017586	contig045968_113	K01520	dUTP pyrophosphatase [EC:3.6.1.23] [RN:R02100]	contig045968-cat_1_113	contig045968-cat_1	1	M	Pyrimidine deoxyribonuleotide biosynthesis, CDP/CTP => dCDP/dCTP,dTDP/dTTP	MISC	Information systems
contig045968	vOTU017586	contig045968_147	K21636	ribonucleoside-triphosphate reductase [EC:1.17.4.2 1.1.98.6] [RN:R02022 R11636]	contig045968-cat_1_147	contig045968-cat_1	1	M	Pyrimidine deoxyribonuleotide biosynthesis, CDP/CTP => dCDP/dCTP,dTDP/dTTP	MISC	Information systems
contig045987	vOTU017599	contig045987_31	K21636	ribonucleoside-triphosphate reductase [EC:1.17.4.2 1.1.98.6] [RN:R02022 R11636]	contig045987-cat_1_31	contig045987-cat_1	1	M	Pyrimidine deoxyribonuleotide biosynthesis, CDP/CTP => dCDP/dCTP,dTDP/dTTP	MISC	Information systems
contig045987	vOTU017599	contig045987_64	K01520	dUTP pyrophosphatase [EC:3.6.1.23] [RN:R02100]	contig045987-cat_1_64	contig045987-cat_1	2	M	Pyrimidine deoxyribonuleotide biosynthesis, CDP/CTP => dCDP/dCTP,dTDP/dTTP	MISC	Information systems
contig046009	vOTU017612	contig046009_13	K01520	dUTP pyrophosphatase [EC:3.6.1.23] [RN:R02100]	contig046009-cat_1_13	contig046009-cat_1	2	M	Pyrimidine deoxyribonuleotide biosynthesis, CDP/CTP => dCDP/dCTP,dTDP/dTTP	MISC	Information systems
contig046011	vOTU017613	contig046011_35	K00558	DNA (cytosine-5-)-methyltransferase [EC:2.1.1.37] [RN:R04858]	contig046011-cat_1_35	contig046011-cat_1	2	MF	Methionine degradation	Organic Nitrogen	Amino Acid
contig046017	vOTU017618	contig046017_62	K01520	dUTP pyrophosphatase [EC:3.6.1.23] [RN:R02100]	contig046017-cat_1_62	contig046017-cat_1	2	M	Pyrimidine deoxyribonuleotide biosynthesis, CDP/CTP => dCDP/dCTP,dTDP/dTTP	MISC	Information systems
contig046017	vOTU017618	contig046017_64	K21636	ribonucleoside-triphosphate reductase [EC:1.17.4.2 1.1.98.6] [RN:R02022 R11636]	contig046017-cat_1_64	contig046017-cat_1	2	M	Pyrimidine deoxyribonuleotide biosynthesis, CDP/CTP => dCDP/dCTP,dTDP/dTTP	MISC	Information systems
contig046017	vOTU017618	contig046017_84	K01939	adenylosuccinate synthase [EC:6.3.4.4] [RN:R01135]	contig046017-cat_1_84	contig046017-cat_1	2	M	Adenine ribonucleotide biosynthesis, IMP => ADP,ATP	MISC	Information systems
contig046032	vOTU017626	contig046032_77	K01520	dUTP pyrophosphatase [EC:3.6.1.23] [RN:R02100]	contig046032-cat_1_77	contig046032-cat_1	1	M	Pyrimidine deoxyribonuleotide biosynthesis, CDP/CTP => dCDP/dCTP,dTDP/dTTP	MISC	Information systems
contig046032	vOTU017626	contig046032_79	K21636	ribonucleoside-triphosphate reductase [EC:1.17.4.2 1.1.98.6] [RN:R02022 R11636]	contig046032-cat_1_79	contig046032-cat_1	1	M	Pyrimidine deoxyribonuleotide biosynthesis, CDP/CTP => dCDP/dCTP,dTDP/dTTP	MISC	Information systems
contig046049	vOTU017639	contig046049_50	K00558	DNA (cytosine-5-)-methyltransferase [EC:2.1.1.37] [RN:R04858]	contig046049-cat_1_50	contig046049-cat_1	1	M	Methionine degradation	Organic Nitrogen	Amino Acid
contig046106	vOTU017676	contig046106_37	K00789	S-adenosylmethionine synthetase [EC:2.5.1.6] [RN:R00177]	contig046106-cat_1_37	contig046106-cat_1	2	M	Cysteine biosynthesis, methionine => cysteine	Organic Nitrogen	Amino Acid
contig046106	vOTU017676	contig046106_37	K00789	S-adenosylmethionine synthetase [EC:2.5.1.6] [RN:R00177]	contig046106-cat_1_37	contig046106-cat_1	2	M	Methionine degradation	Organic Nitrogen	Amino Acid
contig046116	vOTU017683	contig046116_42	K00558	DNA (cytosine-5-)-methyltransferase [EC:2.1.1.37] [RN:R04858]	contig046116-cat_1_42	contig046116-cat_1	2	M	Methionine degradation	Organic Nitrogen	Amino Acid
contig046126	vOTU017691	contig046126_4	K00558	DNA (cytosine-5-)-methyltransferase [EC:2.1.1.37] [RN:R04858]	contig046126-cat_1_4	contig046126-cat_1	2	MF	Methionine degradation	Organic Nitrogen	Amino Acid
contig046150	vOTU017705	contig046150_22	K00558	DNA (cytosine-5-)-methyltransferase [EC:2.1.1.37] [RN:R04858]	contig046150-cat_1_22	contig046150-cat_1	2	M	Methionine degradation	Organic Nitrogen	Amino Acid
contig046152	vOTU017706	contig046152_66	K01520	dUTP pyrophosphatase [EC:3.6.1.23] [RN:R02100]	contig046152-cat_1_66	contig046152-cat_1	1	M	Pyrimidine deoxyribonuleotide biosynthesis, CDP/CTP => dCDP/dCTP,dTDP/dTTP	MISC	Information systems
contig046152	vOTU017706	contig046152_76	K21636	ribonucleoside-triphosphate reductase [EC:1.17.4.2 1.1.98.6] [RN:R02022 R11636]	contig046152-cat_1_76	contig046152-cat_1	1	M	Pyrimidine deoxyribonuleotide biosynthesis, CDP/CTP => dCDP/dCTP,dTDP/dTTP	MISC	Information systems
contig046215	vOTU017745	contig046215_25	K01520	dUTP pyrophosphatase [EC:3.6.1.23] [RN:R02100]	contig046215-cat_1_25	contig046215-cat_1	2	MF	Pyrimidine deoxyribonuleotide biosynthesis, CDP/CTP => dCDP/dCTP,dTDP/dTTP	MISC	Information systems
contig046219	vOTU017747	contig046219_2	K21636	ribonucleoside-triphosphate reductase [EC:1.17.4.2 1.1.98.6] [RN:R02022 R11636]	contig046219-cat_1_2	contig046219-cat_1	2	MF	Pyrimidine deoxyribonuleotide biosynthesis, CDP/CTP => dCDP/dCTP,dTDP/dTTP	MISC	Information systems
contig046285	vOTU017781	contig046285_9	K01520	dUTP pyrophosphatase [EC:3.6.1.23] [RN:R02100]	contig046285-cat_1_9	contig046285-cat_1	2	MF	Pyrimidine deoxyribonuleotide biosynthesis, CDP/CTP => dCDP/dCTP,dTDP/dTTP	MISC	Information systems
contig046316	vOTU017797	contig046316_61	K01520	dUTP pyrophosphatase [EC:3.6.1.23] [RN:R02100]	contig046316-cat_1_61	contig046316-cat_1	2	M	Pyrimidine deoxyribonuleotide biosynthesis, CDP/CTP => dCDP/dCTP,dTDP/dTTP	MISC	Information systems
contig046328	vOTU017803	contig046328_29	K01520	dUTP pyrophosphatase [EC:3.6.1.23] [RN:R02100]	contig046328-cat_1_29	contig046328-cat_1	1	M	Pyrimidine deoxyribonuleotide biosynthesis, CDP/CTP => dCDP/dCTP,dTDP/dTTP	MISC	Information systems
contig046346	vOTU017815	contig046346_2	GT2	GT2 cellulose synthase (EC 2.4.1.12); chitin synthase (EC 2.4.1.16); dolichyl-phosphate beta-D-mannosyltransferase (EC 2.4.1.83); dolichyl-phosphate beta-glucosyltransferase (EC 2.4.1.117); N-acetylglucosaminyltransferase (EC 2.4.1.-); N-acetylgalactosaminyltransferase (EC 2.4.1.-); hyaluronan synthase (EC 2.4.1.212); chitin oligosaccharide synthase (EC 2.4.1.-); beta-1,3-glucan synthase (EC 2.4.…	contig046346-cat_1_2	contig046346-cat_1	2	MF	GlycosylTransferases	carbon utilization	CAZY
contig046361	vOTU017822	contig046361_4	K01520	dUTP pyrophosphatase [EC:3.6.1.23] [RN:R02100]	contig046361-cat_1_4	contig046361-cat_1	2	MF	Pyrimidine deoxyribonuleotide biosynthesis, CDP/CTP => dCDP/dCTP,dTDP/dTTP	MISC	Information systems
contig046382	vOTU017835	contig046382_9	K01520	dUTP pyrophosphatase [EC:3.6.1.23] [RN:R02100]	contig046382-cat_1_9	contig046382-cat_1	2	M	Pyrimidine deoxyribonuleotide biosynthesis, CDP/CTP => dCDP/dCTP,dTDP/dTTP	MISC	Information systems
contig046393	vOTU017839	contig046393_33	K01939	adenylosuccinate synthase [EC:6.3.4.4] [RN:R01135]	contig046393-cat_1_33	contig046393-cat_1	1	M	Adenine ribonucleotide biosynthesis, IMP => ADP,ATP	MISC	Information systems
contig046393	vOTU017839	contig046393_88	K21636	ribonucleoside-triphosphate reductase [EC:1.17.4.2 1.1.98.6] [RN:R02022 R11636]	contig046393-cat_1_88	contig046393-cat_1	1	M	Pyrimidine deoxyribonuleotide biosynthesis, CDP/CTP => dCDP/dCTP,dTDP/dTTP	MISC	Information systems
contig046393	vOTU017839	contig046393_95	K01520	dUTP pyrophosphatase [EC:3.6.1.23] [RN:R02100]	contig046393-cat_1_95	contig046393-cat_1	1	M	Pyrimidine deoxyribonuleotide biosynthesis, CDP/CTP => dCDP/dCTP,dTDP/dTTP	MISC	Information systems
contig046401	vOTU017845	contig046401_4	K21636	ribonucleoside-triphosphate reductase [EC:1.17.4.2 1.1.98.6] [RN:R02022 R11636]	contig046401-cat_1_4	contig046401-cat_1	2	MF	Pyrimidine deoxyribonuleotide biosynthesis, CDP/CTP => dCDP/dCTP,dTDP/dTTP	MISC	Information systems
contig046620	vOTU017952	contig046620_8	K01520	dUTP pyrophosphatase [EC:3.6.1.23] [RN:R02100]	contig046620-cat_1_8	contig046620-cat_1	2	M	Pyrimidine deoxyribonuleotide biosynthesis, CDP/CTP => dCDP/dCTP,dTDP/dTTP	MISC	Information systems
contig046620	vOTU017952	contig046620_12	K21636	ribonucleoside-triphosphate reductase [EC:1.17.4.2 1.1.98.6] [RN:R02022 R11636]	contig046620-cat_1_12	contig046620-cat_1	2	M	Pyrimidine deoxyribonuleotide biosynthesis, CDP/CTP => dCDP/dCTP,dTDP/dTTP	MISC	Information systems
contig046671	vOTU017983	contig046671_9	K00558	DNA (cytosine-5-)-methyltransferase [EC:2.1.1.37] [RN:R04858]	contig046671-cat_1_9	contig046671-cat_1	2	MF	Methionine degradation	Organic Nitrogen	Amino Acid
contig046696	vOTU017997	contig046696_21	K00558	DNA (cytosine-5-)-methyltransferase [EC:2.1.1.37] [RN:R04858]	contig046696-cat_1_21	contig046696-cat_1	2	M	Methionine degradation	Organic Nitrogen	Amino Acid
contig046703	vOTU017999	contig046703_38	K01520	dUTP pyrophosphatase [EC:3.6.1.23] [RN:R02100]	contig046703-cat_1_38	contig046703-cat_1	1	M	Pyrimidine deoxyribonuleotide biosynthesis, CDP/CTP => dCDP/dCTP,dTDP/dTTP	MISC	Information systems
contig046761	vOTU018035	contig046761_9	GT2	GT2 cellulose synthase (EC 2.4.1.12); chitin synthase (EC 2.4.1.16); dolichyl-phosphate beta-D-mannosyltransferase (EC 2.4.1.83); dolichyl-phosphate beta-glucosyltransferase (EC 2.4.1.117); N-acetylglucosaminyltransferase (EC 2.4.1.-); N-acetylgalactosaminyltransferase (EC 2.4.1.-); hyaluronan synthase (EC 2.4.1.212); chitin oligosaccharide synthase (EC 2.4.1.-); beta-1,3-glucan synthase (EC 2.4.…	contig046761-cat_1_9	contig046761-cat_1	1	M	GlycosylTransferases	carbon utilization	CAZY
contig046785	vOTU018043	contig046785_10	K01520	dUTP pyrophosphatase [EC:3.6.1.23] [RN:R02100]	contig046785-cat_1_10	contig046785-cat_1	2	M	Pyrimidine deoxyribonuleotide biosynthesis, CDP/CTP => dCDP/dCTP,dTDP/dTTP	MISC	Information systems
contig046785	vOTU018043	contig046785_15	K21636	ribonucleoside-triphosphate reductase [EC:1.17.4.2 1.1.98.6] [RN:R02022 R11636]	contig046785-cat_1_15	contig046785-cat_1	2	M	Pyrimidine deoxyribonuleotide biosynthesis, CDP/CTP => dCDP/dCTP,dTDP/dTTP	MISC	Information systems
contig046785	vOTU018043	contig046785_17	K21636	ribonucleoside-triphosphate reductase [EC:1.17.4.2 1.1.98.6] [RN:R02022 R11636]	contig046785-cat_1_17	contig046785-cat_1	2	M	Pyrimidine deoxyribonuleotide biosynthesis, CDP/CTP => dCDP/dCTP,dTDP/dTTP	MISC	Information systems
contig046791	vOTU018049	contig046791_14	GT2	GT2 cellulose synthase (EC 2.4.1.12); chitin synthase (EC 2.4.1.16); dolichyl-phosphate beta-D-mannosyltransferase (EC 2.4.1.83); dolichyl-phosphate beta-glucosyltransferase (EC 2.4.1.117); N-acetylglucosaminyltransferase (EC 2.4.1.-); N-acetylgalactosaminyltransferase (EC 2.4.1.-); hyaluronan synthase (EC 2.4.1.212); chitin oligosaccharide synthase (EC 2.4.1.-); beta-1,3-glucan synthase (EC 2.4.…	contig046791-cat_2_14	contig046791-cat_2	3	MF	GlycosylTransferases	carbon utilization	CAZY
contig046806	vOTU018057	contig046806_9	K00558	DNA (cytosine-5-)-methyltransferase [EC:2.1.1.37] [RN:R04858]	contig046806-cat_1_9	contig046806-cat_1	1	MF	Methionine degradation	Organic Nitrogen	Amino Acid
contig046824	vOTU018067	contig046824_19	K01520	dUTP pyrophosphatase [EC:3.6.1.23] [RN:R02100]	contig046824-cat_1_19	contig046824-cat_1	2	M	Pyrimidine deoxyribonuleotide biosynthesis, CDP/CTP => dCDP/dCTP,dTDP/dTTP	MISC	Information systems
contig046825	vOTU018068	contig046825_8	K00558	DNA (cytosine-5-)-methyltransferase [EC:2.1.1.37] [RN:R04858]	contig046825-cat_1_8	contig046825-cat_1	2	MF	Methionine degradation	Organic Nitrogen	Amino Acid
contig046847	vOTU018078	contig046847_7	K00558	DNA (cytosine-5-)-methyltransferase [EC:2.1.1.37] [RN:R04858]	contig046847-cat_1_7	contig046847-cat_1	2	MF	Methionine degradation	Organic Nitrogen	Amino Acid
contig046855	vOTU018083	contig046855_134	K01520	dUTP pyrophosphatase [EC:3.6.1.23] [RN:R02100]	contig046855-cat_1_134	contig046855-cat_1	2	M	Pyrimidine deoxyribonuleotide biosynthesis, CDP/CTP => dCDP/dCTP,dTDP/dTTP	MISC	Information systems
contig046855	vOTU018083	contig046855_145	K21636	ribonucleoside-triphosphate reductase [EC:1.17.4.2 1.1.98.6] [RN:R02022 R11636]	contig046855-cat_1_145	contig046855-cat_1	2	M	Pyrimidine deoxyribonuleotide biosynthesis, CDP/CTP => dCDP/dCTP,dTDP/dTTP	MISC	Information systems
contig046882	vOTU018094	contig046882_2	K01939	adenylosuccinate synthase [EC:6.3.4.4] [RN:R01135]	contig046882-cat_1_2	contig046882-cat_1	2	MF	Adenine ribonucleotide biosynthesis, IMP => ADP,ATP	MISC	Information systems
contig046882	vOTU018094	contig046882_48	K00558	DNA (cytosine-5-)-methyltransferase [EC:2.1.1.37] [RN:R04858]	contig046882-cat_1_48	contig046882-cat_1	2	M	Methionine degradation	Organic Nitrogen	Amino Acid
contig046882	vOTU018094	contig046882_87	K21636	ribonucleoside-triphosphate reductase [EC:1.17.4.2 1.1.98.6] [RN:R02022 R11636]	contig046882-cat_1_87	contig046882-cat_1	2	M	Pyrimidine deoxyribonuleotide biosynthesis, CDP/CTP => dCDP/dCTP,dTDP/dTTP	MISC	Information systems
contig046882	vOTU018094	contig046882_92	K21636	ribonucleoside-triphosphate reductase [EC:1.17.4.2 1.1.98.6] [RN:R02022 R11636]	contig046882-cat_1_92	contig046882-cat_1	2	M	Pyrimidine deoxyribonuleotide biosynthesis, CDP/CTP => dCDP/dCTP,dTDP/dTTP	MISC	Information systems
contig046915	vOTU018114	contig046915_2	K00558	DNA (cytosine-5-)-methyltransferase [EC:2.1.1.37] [RN:R04858]	contig046915-cat_1_2	contig046915-cat_1	2	MF	Methionine degradation	Organic Nitrogen	Amino Acid
contig046952	vOTU018135	contig046952_53	K00558	DNA (cytosine-5-)-methyltransferase [EC:2.1.1.37] [RN:R04858]	contig046952-cat_1_53	contig046952-cat_1	2	MF	Methionine degradation	Organic Nitrogen	Amino Acid
contig046965	vOTU018143	contig046965_46	K01520	dUTP pyrophosphatase [EC:3.6.1.23] [RN:R02100]	contig046965-cat_1_46	contig046965-cat_1	2	M	Pyrimidine deoxyribonuleotide biosynthesis, CDP/CTP => dCDP/dCTP,dTDP/dTTP	MISC	Information systems
contig046969	vOTU018146	contig046969_73	K01939	adenylosuccinate synthase [EC:6.3.4.4] [RN:R01135]	contig046969-cat_1_73	contig046969-cat_1	2	M	Adenine ribonucleotide biosynthesis, IMP => ADP,ATP	MISC	Information systems
contig046979	vOTU018152	contig046979_131	K21636	ribonucleoside-triphosphate reductase [EC:1.17.4.2 1.1.98.6] [RN:R02022 R11636]	contig046979-cat_1_131	contig046979-cat_1	1	M	Pyrimidine deoxyribonuleotide biosynthesis, CDP/CTP => dCDP/dCTP,dTDP/dTTP	MISC	Information systems
contig046979	vOTU018152	contig046979_166	K00656	formate acetyltransferase (pyruvate-formate lyase )	contig046979-cat_1_166	contig046979-cat_1	2	M	pyruvate metabolism	carbon utilization	pyruvate metabolism
contig046987	vOTU018158	contig046987_16	K01520	dUTP pyrophosphatase [EC:3.6.1.23] [RN:R02100]	contig046987-cat_1_16	contig046987-cat_1	2	M	Pyrimidine deoxyribonuleotide biosynthesis, CDP/CTP => dCDP/dCTP,dTDP/dTTP	MISC	Information systems
contig047004	vOTU018165	contig047004_3	K01520	dUTP pyrophosphatase [EC:3.6.1.23] [RN:R02100]	contig047004-cat_2_3	contig047004-cat_2	3	MF	Pyrimidine deoxyribonuleotide biosynthesis, CDP/CTP => dCDP/dCTP,dTDP/dTTP	MISC	Information systems
contig047071	vOTU018204	contig047071_55	K01520	dUTP pyrophosphatase [EC:3.6.1.23] [RN:R02100]	contig047071-cat_1_55	contig047071-cat_1	2	M	Pyrimidine deoxyribonuleotide biosynthesis, CDP/CTP => dCDP/dCTP,dTDP/dTTP	MISC	Information systems
contig047071	vOTU018204	contig047071_77	K21636	ribonucleoside-triphosphate reductase [EC:1.17.4.2 1.1.98.6] [RN:R02022 R11636]	contig047071-cat_1_77	contig047071-cat_1	2	M	Pyrimidine deoxyribonuleotide biosynthesis, CDP/CTP => dCDP/dCTP,dTDP/dTTP	MISC	Information systems
contig047071	vOTU018204	contig047071_81	K21636	ribonucleoside-triphosphate reductase [EC:1.17.4.2 1.1.98.6] [RN:R02022 R11636]	contig047071-cat_1_81	contig047071-cat_1	2	M	Pyrimidine deoxyribonuleotide biosynthesis, CDP/CTP => dCDP/dCTP,dTDP/dTTP	MISC	Information systems
contig047102	vOTU018225	contig047102_27	K01520	dUTP pyrophosphatase [EC:3.6.1.23] [RN:R02100]	contig047102-cat_1_27	contig047102-cat_1	2	M	Pyrimidine deoxyribonuleotide biosynthesis, CDP/CTP => dCDP/dCTP,dTDP/dTTP	MISC	Information systems
contig047117	vOTU018234	contig047117_61	K01520	dUTP pyrophosphatase [EC:3.6.1.23] [RN:R02100]	contig047117-cat_1_61	contig047117-cat_1	1	M	Pyrimidine deoxyribonuleotide biosynthesis, CDP/CTP => dCDP/dCTP,dTDP/dTTP	MISC	Information systems
contig047117	vOTU018234	contig047117_63	K21636	ribonucleoside-triphosphate reductase [EC:1.17.4.2 1.1.98.6] [RN:R02022 R11636]	contig047117-cat_1_63	contig047117-cat_1	1	M	Pyrimidine deoxyribonuleotide biosynthesis, CDP/CTP => dCDP/dCTP,dTDP/dTTP	MISC	Information systems
contig047119	vOTU018726	contig047119_147	K01520	dUTP pyrophosphatase [EC:3.6.1.23] [RN:R02100]	contig047119-cat_1_147	contig047119-cat_1	2	M	Pyrimidine deoxyribonuleotide biosynthesis, CDP/CTP => dCDP/dCTP,dTDP/dTTP	MISC	Information systems
contig047123	vOTU018238	contig047123_22	K01520	dUTP pyrophosphatase [EC:3.6.1.23] [RN:R02100]	contig047123-cat_1_22	contig047123-cat_1	1	M	Pyrimidine deoxyribonuleotide biosynthesis, CDP/CTP => dCDP/dCTP,dTDP/dTTP	MISC	Information systems
contig047123	vOTU018238	contig047123_25	K00560	thymidylate synthase [EC:2.1.1.45] [RN:R02101]	contig047123-cat_1_25	contig047123-cat_1	1	M	Pyrimidine deoxyribonuleotide biosynthesis, CDP/CTP => dCDP/dCTP,dTDP/dTTP	MISC	Information systems
contig047126	vOTU018241	contig047126_19	K01520	dUTP pyrophosphatase [EC:3.6.1.23] [RN:R02100]	contig047126-cat_1_19	contig047126-cat_1	1	M	Pyrimidine deoxyribonuleotide biosynthesis, CDP/CTP => dCDP/dCTP,dTDP/dTTP	MISC	Information systems
contig047126	vOTU018241	contig047126_45	GT2	GT2 cellulose synthase (EC 2.4.1.12); chitin synthase (EC 2.4.1.16); dolichyl-phosphate beta-D-mannosyltransferase (EC 2.4.1.83); dolichyl-phosphate beta-glucosyltransferase (EC 2.4.1.117); N-acetylglucosaminyltransferase (EC 2.4.1.-); N-acetylgalactosaminyltransferase (EC 2.4.1.-); hyaluronan synthase (EC 2.4.1.212); chitin oligosaccharide synthase (EC 2.4.1.-); beta-1,3-glucan synthase (EC 2.4.…	contig047126-cat_1_45	contig047126-cat_1	1	M	GlycosylTransferases	carbon utilization	CAZY
contig047126	vOTU018241	contig047126_53	K00558	DNA (cytosine-5-)-methyltransferase [EC:2.1.1.37] [RN:R04858]	contig047126-cat_1_53	contig047126-cat_1	2	M	Methionine degradation	Organic Nitrogen	Amino Acid
contig047136	vOTU018246	contig047136_114	K01520	dUTP pyrophosphatase [EC:3.6.1.23] [RN:R02100]	contig047136-cat_1_114	contig047136-cat_1	1	M	Pyrimidine deoxyribonuleotide biosynthesis, CDP/CTP => dCDP/dCTP,dTDP/dTTP	MISC	Information systems
contig047136	vOTU018246	contig047136_116	K21636	ribonucleoside-triphosphate reductase [EC:1.17.4.2 1.1.98.6] [RN:R02022 R11636]	contig047136-cat_1_116	contig047136-cat_1	1	M	Pyrimidine deoxyribonuleotide biosynthesis, CDP/CTP => dCDP/dCTP,dTDP/dTTP	MISC	Information systems
contig047136	vOTU018246	contig047136_118	K21636	ribonucleoside-triphosphate reductase [EC:1.17.4.2 1.1.98.6] [RN:R02022 R11636]	contig047136-cat_1_118	contig047136-cat_1	1	M	Pyrimidine deoxyribonuleotide biosynthesis, CDP/CTP => dCDP/dCTP,dTDP/dTTP	MISC	Information systems
contig047136	vOTU018246	contig047136_139	K01491	methylenetetrahydrofolate dehydrogenase (NADP+) / methenyltetrahydrofolate cyclohydrolase [EC:1.5.1.5 3.5.4.9] [RN:R01655 R01220]	contig047136-cat_1_139	contig047136-cat_1	1	M	Reductive acetyl-CoA pathway (Wood-Ljungdahl pathway)	Energy	C1
contig047173	vOTU018266	contig047173_147	K01520	dUTP pyrophosphatase [EC:3.6.1.23] [RN:R02100]	contig047173-cat_1_147	contig047173-cat_1	2	M	Pyrimidine deoxyribonuleotide biosynthesis, CDP/CTP => dCDP/dCTP,dTDP/dTTP	MISC	Information systems
contig047173	vOTU018266	contig047173_149	K01520	dUTP pyrophosphatase [EC:3.6.1.23] [RN:R02100]	contig047173-cat_1_149	contig047173-cat_1	2	M	Pyrimidine deoxyribonuleotide biosynthesis, CDP/CTP => dCDP/dCTP,dTDP/dTTP	MISC	Information systems
contig047232	vOTU018295	contig047232_13	K01520	dUTP pyrophosphatase [EC:3.6.1.23] [RN:R02100]	contig047232-cat_1_13	contig047232-cat_1	2	MF	Pyrimidine deoxyribonuleotide biosynthesis, CDP/CTP => dCDP/dCTP,dTDP/dTTP	MISC	Information systems
contig047270	vOTU018314	contig047270_6	K00558	DNA (cytosine-5-)-methyltransferase [EC:2.1.1.37] [RN:R04858]	contig047270-cat_1_6	contig047270-cat_1	2	MF	Methionine degradation	Organic Nitrogen	Amino Acid
contig047272	vOTU018316	contig047272_58	K01520	dUTP pyrophosphatase [EC:3.6.1.23] [RN:R02100]	contig047272-cat_1_58	contig047272-cat_1	2	MF	Pyrimidine deoxyribonuleotide biosynthesis, CDP/CTP => dCDP/dCTP,dTDP/dTTP	MISC	Information systems
contig047278	vOTU018318	contig047278_26	K01520	dUTP pyrophosphatase [EC:3.6.1.23] [RN:R02100]	contig047278-cat_1_26	contig047278-cat_1	2	M	Pyrimidine deoxyribonuleotide biosynthesis, CDP/CTP => dCDP/dCTP,dTDP/dTTP	MISC	Information systems
contig047291	vOTU018322	contig047291_141	K01520	dUTP pyrophosphatase [EC:3.6.1.23] [RN:R02100]	contig047291-cat_1_141	contig047291-cat_1	1	M	Pyrimidine deoxyribonuleotide biosynthesis, CDP/CTP => dCDP/dCTP,dTDP/dTTP	MISC	Information systems
contig047291	vOTU018322	contig047291_292	K21636	ribonucleoside-triphosphate reductase [EC:1.17.4.2 1.1.98.6] [RN:R02022 R11636]	contig047291-cat_1_292	contig047291-cat_1	1	M	Pyrimidine deoxyribonuleotide biosynthesis, CDP/CTP => dCDP/dCTP,dTDP/dTTP	MISC	Information systems
contig047291	vOTU018322	contig047291_296	K21636	ribonucleoside-triphosphate reductase [EC:1.17.4.2 1.1.98.6] [RN:R02022 R11636]	contig047291-cat_1_296	contig047291-cat_1	1	M	Pyrimidine deoxyribonuleotide biosynthesis, CDP/CTP => dCDP/dCTP,dTDP/dTTP	MISC	Information systems
contig047291	vOTU018322	contig047291_415	C66	Catlytic type: Cysteine; cleaves both gamma chains of human IgG or its Fc fragment in the hinge region after Gly236	contig047291-cat_1_415	contig047291-cat_1	1	M	Bacterial endopeptidase	Organic Nitrogen	Peptidase
contig047301	vOTU018328	contig047301_10	K01520	dUTP pyrophosphatase [EC:3.6.1.23] [RN:R02100]	contig047301-cat_2_10	contig047301-cat_2	3	M	Pyrimidine deoxyribonuleotide biosynthesis, CDP/CTP => dCDP/dCTP,dTDP/dTTP	MISC	Information systems
contig047320	vOTU018337	contig047320_37	K00558	DNA (cytosine-5-)-methyltransferase [EC:2.1.1.37] [RN:R04858]	contig047320-cat_1_37	contig047320-cat_1	2	M	Methionine degradation	Organic Nitrogen	Amino Acid
contig047321	vOTU018338	contig047321_26	K01494	dCTP deaminase [EC:3.5.4.13] [RN:R02325]	contig047321-cat_1_26	contig047321-cat_1	2	M	Pyrimidine deoxyribonuleotide biosynthesis, CDP/CTP => dCDP/dCTP,dTDP/dTTP	MISC	Information systems
contig047326	vOTU018340	contig047326_64	K01520	dUTP pyrophosphatase [EC:3.6.1.23] [RN:R02100]	contig047326-cat_1_64	contig047326-cat_1	2	M	Pyrimidine deoxyribonuleotide biosynthesis, CDP/CTP => dCDP/dCTP,dTDP/dTTP	MISC	Information systems
contig047364	vOTU018367	contig047364_27	K00558	DNA (cytosine-5-)-methyltransferase [EC:2.1.1.37] [RN:R04858]	contig047364-cat_1_27	contig047364-cat_1	1	MF	Methionine degradation	Organic Nitrogen	Amino Acid
contig047378	vOTU018377	contig047378_65	K21636	ribonucleoside-triphosphate reductase [EC:1.17.4.2 1.1.98.6] [RN:R02022 R11636]	contig047378-cat_1_65	contig047378-cat_1	2	M	Pyrimidine deoxyribonuleotide biosynthesis, CDP/CTP => dCDP/dCTP,dTDP/dTTP	MISC	Information systems
contig047378	vOTU018377	contig047378_71	K21636	ribonucleoside-triphosphate reductase [EC:1.17.4.2 1.1.98.6] [RN:R02022 R11636]	contig047378-cat_1_71	contig047378-cat_1	2	M	Pyrimidine deoxyribonuleotide biosynthesis, CDP/CTP => dCDP/dCTP,dTDP/dTTP	MISC	Information systems
contig047404	vOTU018392	contig047404_288	K21636	ribonucleoside-triphosphate reductase [EC:1.17.4.2 1.1.98.6] [RN:R02022 R11636]	contig047404-cat_1_288	contig047404-cat_1	2	MF	Pyrimidine deoxyribonuleotide biosynthesis, CDP/CTP => dCDP/dCTP,dTDP/dTTP	MISC	Information systems
contig047404	vOTU018392	contig047404_295	K01520	dUTP pyrophosphatase [EC:3.6.1.23] [RN:R02100]	contig047404-cat_1_295	contig047404-cat_1	2	MF	Pyrimidine deoxyribonuleotide biosynthesis, CDP/CTP => dCDP/dCTP,dTDP/dTTP	MISC	Information systems
contig047408	vOTU018393	contig047408_56	K01939	adenylosuccinate synthase [EC:6.3.4.4] [RN:R01135]	contig047408-cat_1_56	contig047408-cat_1	2	M	Adenine ribonucleotide biosynthesis, IMP => ADP,ATP	MISC	Information systems
contig047408	vOTU018393	contig047408_120	K21636	ribonucleoside-triphosphate reductase [EC:1.17.4.2 1.1.98.6] [RN:R02022 R11636]	contig047408-cat_1_120	contig047408-cat_1	2	M	Pyrimidine deoxyribonuleotide biosynthesis, CDP/CTP => dCDP/dCTP,dTDP/dTTP	MISC	Information systems
contig047408	vOTU018393	contig047408_125	K01520	dUTP pyrophosphatase [EC:3.6.1.23] [RN:R02100]	contig047408-cat_1_125	contig047408-cat_1	2	M	Pyrimidine deoxyribonuleotide biosynthesis, CDP/CTP => dCDP/dCTP,dTDP/dTTP	MISC	Information systems
contig047410	vOTU018395	contig047410_45	K00558	DNA (cytosine-5-)-methyltransferase [EC:2.1.1.37] [RN:R04858]	contig047410-cat_1_45	contig047410-cat_1	2	M	Methionine degradation	Organic Nitrogen	Amino Acid
contig047420	vOTU018401	contig047420_8	K00558	DNA (cytosine-5-)-methyltransferase [EC:2.1.1.37] [RN:R04858]	contig047420-cat_1_8	contig047420-cat_1	2	MF	Methionine degradation	Organic Nitrogen	Amino Acid
contig047442	vOTU018415	contig047442_60	K01520	dUTP pyrophosphatase [EC:3.6.1.23] [RN:R02100]	contig047442-cat_1_60	contig047442-cat_1	1	M	Pyrimidine deoxyribonuleotide biosynthesis, CDP/CTP => dCDP/dCTP,dTDP/dTTP	MISC	Information systems
contig047460	vOTU018425	contig047460_16	K01520	dUTP pyrophosphatase [EC:3.6.1.23] [RN:R02100]	contig047460-cat_1_16	contig047460-cat_1	2	M	Pyrimidine deoxyribonuleotide biosynthesis, CDP/CTP => dCDP/dCTP,dTDP/dTTP	MISC	Information systems
contig047514	vOTU018457	contig047514_32	K00789	S-adenosylmethionine synthetase [EC:2.5.1.6] [RN:R00177]	contig047514-cat_1_32	contig047514-cat_1	2	M	Cysteine biosynthesis, methionine => cysteine	Organic Nitrogen	Amino Acid
contig047514	vOTU018457	contig047514_32	K00789	S-adenosylmethionine synthetase [EC:2.5.1.6] [RN:R00177]	contig047514-cat_1_32	contig047514-cat_1	2	M	Methionine degradation	Organic Nitrogen	Amino Acid
contig047551	vOTU018475	contig047551_30	K00560	thymidylate synthase [EC:2.1.1.45] [RN:R02101]	contig047551-cat_1_30	contig047551-cat_1	2	M	Pyrimidine deoxyribonuleotide biosynthesis, CDP/CTP => dCDP/dCTP,dTDP/dTTP	MISC	Information systems
contig047594	vOTU018506	contig047594_15	K01520	dUTP pyrophosphatase [EC:3.6.1.23] [RN:R02100]	contig047594-cat_1_15	contig047594-cat_1	2	M	Pyrimidine deoxyribonuleotide biosynthesis, CDP/CTP => dCDP/dCTP,dTDP/dTTP	MISC	Information systems
contig047656	vOTU018539	contig047656_10	K21636	ribonucleoside-triphosphate reductase [EC:1.17.4.2 1.1.98.6] [RN:R02022 R11636]	contig047656-cat_1_10	contig047656-cat_1	2	M	Pyrimidine deoxyribonuleotide biosynthesis, CDP/CTP => dCDP/dCTP,dTDP/dTTP	MISC	Information systems
contig047656	vOTU018539	contig047656_17	K01520	dUTP pyrophosphatase [EC:3.6.1.23] [RN:R02100]	contig047656-cat_1_17	contig047656-cat_1	2	M	Pyrimidine deoxyribonuleotide biosynthesis, CDP/CTP => dCDP/dCTP,dTDP/dTTP	MISC	Information systems
contig047687	vOTU018554	contig047687_49	K21636	ribonucleoside-triphosphate reductase [EC:1.17.4.2 1.1.98.6] [RN:R02022 R11636]	contig047687-cat_1_49	contig047687-cat_1	1	M	Pyrimidine deoxyribonuleotide biosynthesis, CDP/CTP => dCDP/dCTP,dTDP/dTTP	MISC	Information systems
contig047687	vOTU018554	contig047687_79	K01520	dUTP pyrophosphatase [EC:3.6.1.23] [RN:R02100]	contig047687-cat_1_79	contig047687-cat_1	1	M	Pyrimidine deoxyribonuleotide biosynthesis, CDP/CTP => dCDP/dCTP,dTDP/dTTP	MISC	Information systems
contig047712	vOTU018568	contig047712_25	K01520	dUTP pyrophosphatase [EC:3.6.1.23] [RN:R02100]	contig047712-cat_1_25	contig047712-cat_1	2	M	Pyrimidine deoxyribonuleotide biosynthesis, CDP/CTP => dCDP/dCTP,dTDP/dTTP	MISC	Information systems
contig047713	vOTU018569	contig047713_14	K00789	S-adenosylmethionine synthetase [EC:2.5.1.6] [RN:R00177]	contig047713-cat_1_14	contig047713-cat_1	1	MF	Cysteine biosynthesis, methionine => cysteine	Organic Nitrogen	Amino Acid
contig047713	vOTU018569	contig047713_14	K00789	S-adenosylmethionine synthetase [EC:2.5.1.6] [RN:R00177]	contig047713-cat_1_14	contig047713-cat_1	1	MF	Methionine degradation	Organic Nitrogen	Amino Acid
contig047722	vOTU018573	contig047722_64	K21636	ribonucleoside-triphosphate reductase [EC:1.17.4.2 1.1.98.6] [RN:R02022 R11636]	contig047722-cat_1_64	contig047722-cat_1	2	M	Pyrimidine deoxyribonuleotide biosynthesis, CDP/CTP => dCDP/dCTP,dTDP/dTTP	MISC	Information systems
contig047722	vOTU018573	contig047722_67	K01520	dUTP pyrophosphatase [EC:3.6.1.23] [RN:R02100]	contig047722-cat_1_67	contig047722-cat_1	2	M	Pyrimidine deoxyribonuleotide biosynthesis, CDP/CTP => dCDP/dCTP,dTDP/dTTP	MISC	Information systems
contig047722	vOTU018573	contig047722_139	K00558	DNA (cytosine-5-)-methyltransferase [EC:2.1.1.37] [RN:R04858]	contig047722-cat_1_139	contig047722-cat_1	2	M	Methionine degradation	Organic Nitrogen	Amino Acid
contig047727	vOTU018575	contig047727_9	K00558	DNA (cytosine-5-)-methyltransferase [EC:2.1.1.37] [RN:R04858]	contig047727-cat_1_9	contig047727-cat_1	1	M	Methionine degradation	Organic Nitrogen	Amino Acid
contig047732	vOTU018578	contig047732_3	K00789	S-adenosylmethionine synthetase [EC:2.5.1.6] [RN:R00177]	contig047732-cat_1_3	contig047732-cat_1	2	MF	Cysteine biosynthesis, methionine => cysteine	Organic Nitrogen	Amino Acid
contig047732	vOTU018578	contig047732_3	K00789	S-adenosylmethionine synthetase [EC:2.5.1.6] [RN:R00177]	contig047732-cat_1_3	contig047732-cat_1	2	MF	Methionine degradation	Organic Nitrogen	Amino Acid
contig047781	vOTU018602	contig047781_7	K01520	dUTP pyrophosphatase [EC:3.6.1.23] [RN:R02100]	contig047781-cat_1_7	contig047781-cat_1	2	MF	Pyrimidine deoxyribonuleotide biosynthesis, CDP/CTP => dCDP/dCTP,dTDP/dTTP	MISC	Information systems
contig047781	vOTU018602	contig047781_9	K21636	ribonucleoside-triphosphate reductase [EC:1.17.4.2 1.1.98.6] [RN:R02022 R11636]	contig047781-cat_1_9	contig047781-cat_1	2	M	Pyrimidine deoxyribonuleotide biosynthesis, CDP/CTP => dCDP/dCTP,dTDP/dTTP	MISC	Information systems
contig047813	vOTU018616	contig047813_42	K01939	adenylosuccinate synthase [EC:6.3.4.4] [RN:R01135]	contig047813-cat_1_42	contig047813-cat_1	1	M	Adenine ribonucleotide biosynthesis, IMP => ADP,ATP	MISC	Information systems
contig047819	vOTU018618	contig047819_11	K21636	ribonucleoside-triphosphate reductase [EC:1.17.4.2 1.1.98.6] [RN:R02022 R11636]	contig047819-cat_1_11	contig047819-cat_1	2	M	Pyrimidine deoxyribonuleotide biosynthesis, CDP/CTP => dCDP/dCTP,dTDP/dTTP	MISC	Information systems
contig047819	vOTU018618	contig047819_14	K01520	dUTP pyrophosphatase [EC:3.6.1.23] [RN:R02100]	contig047819-cat_1_14	contig047819-cat_1	2	M	Pyrimidine deoxyribonuleotide biosynthesis, CDP/CTP => dCDP/dCTP,dTDP/dTTP	MISC	Information systems
contig047835	vOTU018624	contig047835_83	K00558	DNA (cytosine-5-)-methyltransferase [EC:2.1.1.37] [RN:R04858]	contig047835-cat_1_83	contig047835-cat_1	2	MF	Methionine degradation	Organic Nitrogen	Amino Acid
contig047837	vOTU018625	contig047837_52	K01494	dCTP deaminase [EC:3.5.4.13] [RN:R02325]	contig047837-cat_1_52	contig047837-cat_1	2	MF	Pyrimidine deoxyribonuleotide biosynthesis, CDP/CTP => dCDP/dCTP,dTDP/dTTP	MISC	Information systems
contig047846	vOTU018627	contig047846_15	K00558	DNA (cytosine-5-)-methyltransferase [EC:2.1.1.37] [RN:R04858]	contig047846-cat_1_15	contig047846-cat_1	2	M	Methionine degradation	Organic Nitrogen	Amino Acid
contig047855	vOTU018629	contig047855_16	K01520	dUTP pyrophosphatase [EC:3.6.1.23] [RN:R02100]	contig047855-cat_1_16	contig047855-cat_1	2	M	Pyrimidine deoxyribonuleotide biosynthesis, CDP/CTP => dCDP/dCTP,dTDP/dTTP	MISC	Information systems
contig047855	vOTU018629	contig047855_131	GT2	GT2 cellulose synthase (EC 2.4.1.12); chitin synthase (EC 2.4.1.16); dolichyl-phosphate beta-D-mannosyltransferase (EC 2.4.1.83); dolichyl-phosphate beta-glucosyltransferase (EC 2.4.1.117); N-acetylglucosaminyltransferase (EC 2.4.1.-); N-acetylgalactosaminyltransferase (EC 2.4.1.-); hyaluronan synthase (EC 2.4.1.212); chitin oligosaccharide synthase (EC 2.4.1.-); beta-1,3-glucan synthase (EC 2.4.…	contig047855-cat_1_131	contig047855-cat_1	2	M	GlycosylTransferases	carbon utilization	CAZY
contig047895	vOTU018645	contig047895_6	K21636	ribonucleoside-triphosphate reductase [EC:1.17.4.2 1.1.98.6] [RN:R02022 R11636]	contig047895-cat_1_6	contig047895-cat_1	2	MF	Pyrimidine deoxyribonuleotide biosynthesis, CDP/CTP => dCDP/dCTP,dTDP/dTTP	MISC	Information systems
contig047895	vOTU018645	contig047895_11	K21636	ribonucleoside-triphosphate reductase [EC:1.17.4.2 1.1.98.6] [RN:R02022 R11636]	contig047895-cat_1_11	contig047895-cat_1	2	M	Pyrimidine deoxyribonuleotide biosynthesis, CDP/CTP => dCDP/dCTP,dTDP/dTTP	MISC	Information systems
contig047929	vOTU018661	contig047929_12	K00558	DNA (cytosine-5-)-methyltransferase [EC:2.1.1.37] [RN:R04858]	contig047929-cat_1_12	contig047929-cat_1	2	M	Methionine degradation	Organic Nitrogen	Amino Acid
contig047942	vOTU018668	contig047942_10	K01520	dUTP pyrophosphatase [EC:3.6.1.23] [RN:R02100]	contig047942-cat_2_10	contig047942-cat_2	3	MF	Pyrimidine deoxyribonuleotide biosynthesis, CDP/CTP => dCDP/dCTP,dTDP/dTTP	MISC	Information systems
contig047945	vOTU018671	contig047945_20	K01520	dUTP pyrophosphatase [EC:3.6.1.23] [RN:R02100]	contig047945-cat_1_20	contig047945-cat_1	2	M	Pyrimidine deoxyribonuleotide biosynthesis, CDP/CTP => dCDP/dCTP,dTDP/dTTP	MISC	Information systems
contig048030	vOTU018713	contig048030_32	K01520	dUTP pyrophosphatase [EC:3.6.1.23] [RN:R02100]	contig048030-cat_1_32	contig048030-cat_1	2	M	Pyrimidine deoxyribonuleotide biosynthesis, CDP/CTP => dCDP/dCTP,dTDP/dTTP	MISC	Information systems
contig048030	vOTU018713	contig048030_37	K21636	ribonucleoside-triphosphate reductase [EC:1.17.4.2 1.1.98.6] [RN:R02022 R11636]	contig048030-cat_1_37	contig048030-cat_1	2	M	Pyrimidine deoxyribonuleotide biosynthesis, CDP/CTP => dCDP/dCTP,dTDP/dTTP	MISC	Information systems
contig048030	vOTU018713	contig048030_39	K21636	ribonucleoside-triphosphate reductase [EC:1.17.4.2 1.1.98.6] [RN:R02022 R11636]	contig048030-cat_1_39	contig048030-cat_1	2	M	Pyrimidine deoxyribonuleotide biosynthesis, CDP/CTP => dCDP/dCTP,dTDP/dTTP	MISC	Information systems
contig048035	vOTU018717	contig048035_11	K01494	dCTP deaminase [EC:3.5.4.13] [RN:R02325]	contig048035-cat_1_11	contig048035-cat_1	2	M	Pyrimidine deoxyribonuleotide biosynthesis, CDP/CTP => dCDP/dCTP,dTDP/dTTP	MISC	Information systems
contig048085	vOTU018743	contig048085_41	K01494	dCTP deaminase [EC:3.5.4.13] [RN:R02325]	contig048085-cat_1_41	contig048085-cat_1	2	M	Pyrimidine deoxyribonuleotide biosynthesis, CDP/CTP => dCDP/dCTP,dTDP/dTTP	MISC	Information systems
contig048270	vOTU018825	contig048270_36	K00789	S-adenosylmethionine synthetase [EC:2.5.1.6] [RN:R00177]	contig048270-cat_1_36	contig048270-cat_1	1	M	Cysteine biosynthesis, methionine => cysteine	Organic Nitrogen	Amino Acid
contig048270	vOTU018825	contig048270_36	K00789	S-adenosylmethionine synthetase [EC:2.5.1.6] [RN:R00177]	contig048270-cat_1_36	contig048270-cat_1	1	M	Methionine degradation	Organic Nitrogen	Amino Acid
contig048301	vOTU018846	contig048301_58	K01939	adenylosuccinate synthase [EC:6.3.4.4] [RN:R01135]	contig048301-cat_1_58	contig048301-cat_1	2	M	Adenine ribonucleotide biosynthesis, IMP => ADP,ATP	MISC	Information systems
contig048305	vOTU018848	contig048305_5	K00789	S-adenosylmethionine synthetase [EC:2.5.1.6] [RN:R00177]	contig048305-cat_1_5	contig048305-cat_1	2	MF	Cysteine biosynthesis, methionine => cysteine	Organic Nitrogen	Amino Acid
contig048305	vOTU018848	contig048305_5	K00789	S-adenosylmethionine synthetase [EC:2.5.1.6] [RN:R00177]	contig048305-cat_1_5	contig048305-cat_1	2	MF	Methionine degradation	Organic Nitrogen	Amino Acid
contig048335	vOTU018866	contig048335_66	K21636	ribonucleoside-triphosphate reductase [EC:1.17.4.2 1.1.98.6] [RN:R02022 R11636]	contig048335-cat_1_66	contig048335-cat_1	1	M	Pyrimidine deoxyribonuleotide biosynthesis, CDP/CTP => dCDP/dCTP,dTDP/dTTP	MISC	Information systems
contig048335	vOTU018866	contig048335_71	K01520	dUTP pyrophosphatase [EC:3.6.1.23] [RN:R02100]	contig048335-cat_1_71	contig048335-cat_1	1	M	Pyrimidine deoxyribonuleotide biosynthesis, CDP/CTP => dCDP/dCTP,dTDP/dTTP	MISC	Information systems
contig048389	vOTU018895	contig048389_32	K00558	DNA (cytosine-5-)-methyltransferase [EC:2.1.1.37] [RN:R04858]	contig048389-cat_2_32	contig048389-cat_2	3	MF	Methionine degradation	Organic Nitrogen	Amino Acid
contig048396	vOTU018896	contig048396_23	K00558	DNA (cytosine-5-)-methyltransferase [EC:2.1.1.37] [RN:R04858]	contig048396-cat_1_23	contig048396-cat_1	2	M	Methionine degradation	Organic Nitrogen	Amino Acid
contig048398	vOTU018897	contig048398_14	K01494	dCTP deaminase [EC:3.5.4.13] [RN:R02325]	contig048398-cat_1_14	contig048398-cat_1	2	M	Pyrimidine deoxyribonuleotide biosynthesis, CDP/CTP => dCDP/dCTP,dTDP/dTTP	MISC	Information systems
contig048398	vOTU018897	contig048398_15	K21636	ribonucleoside-triphosphate reductase [EC:1.17.4.2 1.1.98.6] [RN:R02022 R11636]	contig048398-cat_1_15	contig048398-cat_1	2	M	Pyrimidine deoxyribonuleotide biosynthesis, CDP/CTP => dCDP/dCTP,dTDP/dTTP	MISC	Information systems
contig048595	vOTU018975	contig048595_63	K01520	dUTP pyrophosphatase [EC:3.6.1.23] [RN:R02100]	contig048595-cat_1_63	contig048595-cat_1	1	M	Pyrimidine deoxyribonuleotide biosynthesis, CDP/CTP => dCDP/dCTP,dTDP/dTTP	MISC	Information systems
contig048595	vOTU018975	contig048595_97	K00525	ribonucleoside-diphosphate reductase [EC:1.17.4.1] [RN:R02024]	contig048595-cat_1_97	contig048595-cat_1	1	MKE	Pyrimidine deoxyribonuleotide biosynthesis, CDP/CTP => dCDP/dCTP,dTDP/dTTP	MISC	Information systems
contig048675	vOTU019011	contig048675_16	K00558	DNA (cytosine-5-)-methyltransferase [EC:2.1.1.37] [RN:R04858]	contig048675-cat_1_16	contig048675-cat_1	2	MF	Methionine degradation	Organic Nitrogen	Amino Acid
contig048714	vOTU019026	contig048714_71	K21636	ribonucleoside-triphosphate reductase [EC:1.17.4.2 1.1.98.6] [RN:R02022 R11636]	contig048714-cat_1_71	contig048714-cat_1	1	M	Pyrimidine deoxyribonuleotide biosynthesis, CDP/CTP => dCDP/dCTP,dTDP/dTTP	MISC	Information systems
contig048714	vOTU019026	contig048714_76	K01520	dUTP pyrophosphatase [EC:3.6.1.23] [RN:R02100]	contig048714-cat_1_76	contig048714-cat_1	1	M	Pyrimidine deoxyribonuleotide biosynthesis, CDP/CTP => dCDP/dCTP,dTDP/dTTP	MISC	Information systems
contig048824	vOTU019056	contig048824_236	K01520	dUTP pyrophosphatase [EC:3.6.1.23] [RN:R02100]	contig048824-cat_2_236	contig048824-cat_2	3	M	Pyrimidine deoxyribonuleotide biosynthesis, CDP/CTP => dCDP/dCTP,dTDP/dTTP	MISC	Information systems
contig048824	vOTU019056	contig048824_247	K21636	ribonucleoside-triphosphate reductase [EC:1.17.4.2 1.1.98.6] [RN:R02022 R11636]	contig048824-cat_2_247	contig048824-cat_2	3	M	Pyrimidine deoxyribonuleotide biosynthesis, CDP/CTP => dCDP/dCTP,dTDP/dTTP	MISC	Information systems
contig048862	vOTU019071	contig048862_35	K00558	DNA (cytosine-5-)-methyltransferase [EC:2.1.1.37] [RN:R04858]	contig048862-cat_1_35	contig048862-cat_1	2	MF	Methionine degradation	Organic Nitrogen	Amino Acid
contig048919	vOTU019091	contig048919_5	K00558	DNA (cytosine-5-)-methyltransferase [EC:2.1.1.37] [RN:R04858]	contig048919-cat_2_5	contig048919-cat_2	3	MF	Methionine degradation	Organic Nitrogen	Amino Acid
contig048938	vOTU019096	contig048938_21	K01520	dUTP pyrophosphatase [EC:3.6.1.23] [RN:R02100]	contig048938-cat_2_21	contig048938-cat_2	3	M	Pyrimidine deoxyribonuleotide biosynthesis, CDP/CTP => dCDP/dCTP,dTDP/dTTP	MISC	Information systems
contig048938	vOTU019096	contig048938_32	K00560	thymidylate synthase [EC:2.1.1.45] [RN:R02101]	contig048938-cat_2_32	contig048938-cat_2	3	MF	Pyrimidine deoxyribonuleotide biosynthesis, CDP/CTP => dCDP/dCTP,dTDP/dTTP	MISC	Information systems
contig048962	vOTU019108	contig048962_14	K00558	DNA (cytosine-5-)-methyltransferase [EC:2.1.1.37] [RN:R04858]	contig048962-cat_1_14	contig048962-cat_1	2	M	Methionine degradation	Organic Nitrogen	Amino Acid
contig049089	vOTU019156	contig049089_21	K00558	DNA (cytosine-5-)-methyltransferase [EC:2.1.1.37] [RN:R04858]	contig049089-cat_1_21	contig049089-cat_1	1	M	Methionine degradation	Organic Nitrogen	Amino Acid
contig049092	vOTU019159	contig049092_144	K01520	dUTP pyrophosphatase [EC:3.6.1.23] [RN:R02100]	contig049092-cat_1_144	contig049092-cat_1	2	M	Pyrimidine deoxyribonuleotide biosynthesis, CDP/CTP => dCDP/dCTP,dTDP/dTTP	MISC	Information systems
contig049093	vOTU019160	contig049093_25	GT2	GT2 cellulose synthase (EC 2.4.1.12); chitin synthase (EC 2.4.1.16); dolichyl-phosphate beta-D-mannosyltransferase (EC 2.4.1.83); dolichyl-phosphate beta-glucosyltransferase (EC 2.4.1.117); N-acetylglucosaminyltransferase (EC 2.4.1.-); N-acetylgalactosaminyltransferase (EC 2.4.1.-); hyaluronan synthase (EC 2.4.1.212); chitin oligosaccharide synthase (EC 2.4.1.-); beta-1,3-glucan synthase (EC 2.4.…	contig049093-cat_2_25	contig049093-cat_2	3	M	GlycosylTransferases	carbon utilization	CAZY
contig049093	vOTU019160	contig049093_28	K01520	dUTP pyrophosphatase [EC:3.6.1.23] [RN:R02100]	contig049093-cat_2_28	contig049093-cat_2	3	M	Pyrimidine deoxyribonuleotide biosynthesis, CDP/CTP => dCDP/dCTP,dTDP/dTTP	MISC	Information systems
contig049104	vOTU019164	contig049104_46	K00558	DNA (cytosine-5-)-methyltransferase [EC:2.1.1.37] [RN:R04858]	contig049104-cat_1_46	contig049104-cat_1	1	M	Methionine degradation	Organic Nitrogen	Amino Acid
contig049161	vOTU019185	contig049161_22	K00558	DNA (cytosine-5-)-methyltransferase [EC:2.1.1.37] [RN:R04858]	contig049161-cat_1_22	contig049161-cat_1	2	M	Methionine degradation	Organic Nitrogen	Amino Acid
contig049183	vOTU019193	contig049183_17	K01494	dCTP deaminase [EC:3.5.4.13] [RN:R02325]	contig049183-cat_1_17	contig049183-cat_1	1	M	Pyrimidine deoxyribonuleotide biosynthesis, CDP/CTP => dCDP/dCTP,dTDP/dTTP	MISC	Information systems
contig049184	vOTU019194	contig049184_16	K00789	S-adenosylmethionine synthetase [EC:2.5.1.6] [RN:R00177]	contig049184-cat_1_16	contig049184-cat_1	1	M	Cysteine biosynthesis, methionine => cysteine	Organic Nitrogen	Amino Acid
contig049184	vOTU019194	contig049184_16	K00789	S-adenosylmethionine synthetase [EC:2.5.1.6] [RN:R00177]	contig049184-cat_1_16	contig049184-cat_1	1	M	Methionine degradation	Organic Nitrogen	Amino Acid
contig049186	vOTU019195	contig049186_27	K00789	S-adenosylmethionine synthetase [EC:2.5.1.6] [RN:R00177]	contig049186-cat_1_27	contig049186-cat_1	2	M	Cysteine biosynthesis, methionine => cysteine	Organic Nitrogen	Amino Acid
contig049186	vOTU019195	contig049186_27	K00789	S-adenosylmethionine synthetase [EC:2.5.1.6] [RN:R00177]	contig049186-cat_1_27	contig049186-cat_1	2	M	Methionine degradation	Organic Nitrogen	Amino Acid
contig049212	vOTU019209	contig049212_7	K01520	dUTP pyrophosphatase [EC:3.6.1.23] [RN:R02100]	contig049212-cat_1_7	contig049212-cat_1	2	M	Pyrimidine deoxyribonuleotide biosynthesis, CDP/CTP => dCDP/dCTP,dTDP/dTTP	MISC	Information systems
contig049212	vOTU019209	contig049212_30	K02990	small subunit ribosomal protein S6	contig049212-cat_1_30	contig049212-cat_1	1	M	Ribosome, bacteria	MISC	Information systems
contig049230	vOTU019215	contig049230_63	K01520	dUTP pyrophosphatase [EC:3.6.1.23] [RN:R02100]	contig049230-cat_1_63	contig049230-cat_1	2	M	Pyrimidine deoxyribonuleotide biosynthesis, CDP/CTP => dCDP/dCTP,dTDP/dTTP	MISC	Information systems
contig049234	vOTU019218	contig049234_157	K21636	ribonucleoside-triphosphate reductase [EC:1.17.4.2 1.1.98.6] [RN:R02022 R11636]	contig049234-cat_1_157	contig049234-cat_1	2	M	Pyrimidine deoxyribonuleotide biosynthesis, CDP/CTP => dCDP/dCTP,dTDP/dTTP	MISC	Information systems
contig049257	vOTU019228	contig049257_124	K01520	dUTP pyrophosphatase [EC:3.6.1.23] [RN:R02100]	contig049257-cat_2_124	contig049257-cat_2	3	M	Pyrimidine deoxyribonuleotide biosynthesis, CDP/CTP => dCDP/dCTP,dTDP/dTTP	MISC	Information systems
contig049257	vOTU019228	contig049257_141	K21636	ribonucleoside-triphosphate reductase [EC:1.17.4.2 1.1.98.6] [RN:R02022 R11636]	contig049257-cat_2_141	contig049257-cat_2	3	M	Pyrimidine deoxyribonuleotide biosynthesis, CDP/CTP => dCDP/dCTP,dTDP/dTTP	MISC	Information systems
contig049287	vOTU019239	contig049287_4	K21636	ribonucleoside-triphosphate reductase [EC:1.17.4.2 1.1.98.6] [RN:R02022 R11636]	contig049287-cat_1_4	contig049287-cat_1	2	MF	Pyrimidine deoxyribonuleotide biosynthesis, CDP/CTP => dCDP/dCTP,dTDP/dTTP	MISC	Information systems
contig049344	vOTU063199	contig049344_34	K01520	dUTP pyrophosphatase [EC:3.6.1.23] [RN:R02100]	contig049344-cat_1_34	contig049344-cat_1	2	M	Pyrimidine deoxyribonuleotide biosynthesis, CDP/CTP => dCDP/dCTP,dTDP/dTTP	MISC	Information systems
contig049383	vOTU019288	contig049383_77	K01494	dCTP deaminase [EC:3.5.4.13] [RN:R02325]	contig049383-cat_1_77	contig049383-cat_1	1	M	Pyrimidine deoxyribonuleotide biosynthesis, CDP/CTP => dCDP/dCTP,dTDP/dTTP	MISC	Information systems
contig049383	vOTU019288	contig049383_89	K00558	DNA (cytosine-5-)-methyltransferase [EC:2.1.1.37] [RN:R04858]	contig049383-cat_1_89	contig049383-cat_1	1	MF	Methionine degradation	Organic Nitrogen	Amino Acid
contig049385	vOTU019289	contig049385_11	K00558	DNA (cytosine-5-)-methyltransferase [EC:2.1.1.37] [RN:R04858]	contig049385-cat_1_11	contig049385-cat_1	2	MF	Methionine degradation	Organic Nitrogen	Amino Acid
contig049390	vOTU019292	contig049390_128	K01520	dUTP pyrophosphatase [EC:3.6.1.23] [RN:R02100]	contig049390-cat_1_128	contig049390-cat_1	2	M	Pyrimidine deoxyribonuleotide biosynthesis, CDP/CTP => dCDP/dCTP,dTDP/dTTP	MISC	Information systems
contig049390	vOTU019292	contig049390_144	K21636	ribonucleoside-triphosphate reductase [EC:1.17.4.2 1.1.98.6] [RN:R02022 R11636]	contig049390-cat_1_144	contig049390-cat_1	2	M	Pyrimidine deoxyribonuleotide biosynthesis, CDP/CTP => dCDP/dCTP,dTDP/dTTP	MISC	Information systems
contig049406	vOTU019304	contig049406_13	K00558	DNA (cytosine-5-)-methyltransferase [EC:2.1.1.37] [RN:R04858]	contig049406-cat_1_13	contig049406-cat_1	2	MF	Methionine degradation	Organic Nitrogen	Amino Acid
contig049454	vOTU019330	contig049454_24	K01520	dUTP pyrophosphatase [EC:3.6.1.23] [RN:R02100]	contig049454-cat_1_24	contig049454-cat_1	1	M	Pyrimidine deoxyribonuleotide biosynthesis, CDP/CTP => dCDP/dCTP,dTDP/dTTP	MISC	Information systems
contig049454	vOTU019330	contig049454_28	K21636	ribonucleoside-triphosphate reductase [EC:1.17.4.2 1.1.98.6] [RN:R02022 R11636]	contig049454-cat_1_28	contig049454-cat_1	1	M	Pyrimidine deoxyribonuleotide biosynthesis, CDP/CTP => dCDP/dCTP,dTDP/dTTP	MISC	Information systems
contig049454	vOTU019330	contig049454_51	K09882	cobS; cobaltochelatase CobS [EC:6.6.1.2]	contig049454-cat_1_51	contig049454-cat_1	1	M	Cobalamin biosynthesis, precorrin2 => cobinamide	MISC	aerobic corrin ring synthesis
contig049454	vOTU019330	contig049454_52	K09883	cobT; cobaltochelatase CobT [EC:6.6.1.2]	contig049454-cat_1_52	contig049454-cat_1	1	M	Cobalamin biosynthesis, precorrin2 => cobinamide	MISC	aerobic corrin ring synthesis
contig049658	vOTU019429	contig049658_4	K01520	dUTP pyrophosphatase [EC:3.6.1.23] [RN:R02100]	contig049658-cat_2_4	contig049658-cat_2	3	MF	Pyrimidine deoxyribonuleotide biosynthesis, CDP/CTP => dCDP/dCTP,dTDP/dTTP	MISC	Information systems
contig049691	vOTU019436	contig049691_8	K00558	DNA (cytosine-5-)-methyltransferase [EC:2.1.1.37] [RN:R04858]	contig049691-cat_1_8	contig049691-cat_1	2	MF	Methionine degradation	Organic Nitrogen	Amino Acid
contig049761	vOTU019462	contig049761_44	K00558	DNA (cytosine-5-)-methyltransferase [EC:2.1.1.37] [RN:R04858]	contig049761-cat_1_44	contig049761-cat_1	1	M	Methionine degradation	Organic Nitrogen	Amino Acid
contig049761	vOTU019462	contig049761_80	K01520	dUTP pyrophosphatase [EC:3.6.1.23] [RN:R02100]	contig049761-cat_1_80	contig049761-cat_1	1	M	Pyrimidine deoxyribonuleotide biosynthesis, CDP/CTP => dCDP/dCTP,dTDP/dTTP	MISC	Information systems
contig049787	vOTU019472	contig049787_100	K21636	ribonucleoside-triphosphate reductase [EC:1.17.4.2 1.1.98.6] [RN:R02022 R11636]	contig049787-cat_2_100	contig049787-cat_2	3	MF	Pyrimidine deoxyribonuleotide biosynthesis, CDP/CTP => dCDP/dCTP,dTDP/dTTP	MISC	Information systems
contig049787	vOTU019472	contig049787_102	K01520	dUTP pyrophosphatase [EC:3.6.1.23] [RN:R02100]	contig049787-cat_2_102	contig049787-cat_2	3	MF	Pyrimidine deoxyribonuleotide biosynthesis, CDP/CTP => dCDP/dCTP,dTDP/dTTP	MISC	Information systems
contig049805	vOTU019477	contig049805_26	K00560	thymidylate synthase [EC:2.1.1.45] [RN:R02101]	contig049805-cat_1_26	contig049805-cat_1	2	M	Pyrimidine deoxyribonuleotide biosynthesis, CDP/CTP => dCDP/dCTP,dTDP/dTTP	MISC	Information systems
contig049809	vOTU019479	contig049809_57	K21636	ribonucleoside-triphosphate reductase [EC:1.17.4.2 1.1.98.6] [RN:R02022 R11636]	contig049809-cat_2_57	contig049809-cat_2	3	M	Pyrimidine deoxyribonuleotide biosynthesis, CDP/CTP => dCDP/dCTP,dTDP/dTTP	MISC	Information systems
contig049809	vOTU019479	contig049809_66	K01520	dUTP pyrophosphatase [EC:3.6.1.23] [RN:R02100]	contig049809-cat_2_66	contig049809-cat_2	3	M	Pyrimidine deoxyribonuleotide biosynthesis, CDP/CTP => dCDP/dCTP,dTDP/dTTP	MISC	Information systems
contig049811	vOTU019480	contig049811_44	K00558	DNA (cytosine-5-)-methyltransferase [EC:2.1.1.37] [RN:R04858]	contig049811-cat_1_44	contig049811-cat_1	2	M	Methionine degradation	Organic Nitrogen	Amino Acid
contig049821	vOTU019483	contig049821_109	K01520	dUTP pyrophosphatase [EC:3.6.1.23] [RN:R02100]	contig049821-cat_1_109	contig049821-cat_1	1	M	Pyrimidine deoxyribonuleotide biosynthesis, CDP/CTP => dCDP/dCTP,dTDP/dTTP	MISC	Information systems
contig049821	vOTU019483	contig049821_166	K00525	ribonucleoside-diphosphate reductase [EC:1.17.4.1] [RN:R02024]	contig049821-cat_1_166	contig049821-cat_1	1	MKE	Pyrimidine deoxyribonuleotide biosynthesis, CDP/CTP => dCDP/dCTP,dTDP/dTTP	MISC	Information systems
contig049916	vOTU019521	contig049916_9	K00558	DNA (cytosine-5-)-methyltransferase [EC:2.1.1.37] [RN:R04858]	contig049916-cat_1_9	contig049916-cat_1	2	MF	Methionine degradation	Organic Nitrogen	Amino Acid
contig050033	vOTU019570	contig050033_37	K00558	DNA (cytosine-5-)-methyltransferase [EC:2.1.1.37] [RN:R04858]	contig050033-cat_1_37	contig050033-cat_1	2	M	Methionine degradation	Organic Nitrogen	Amino Acid
contig050105	vOTU019604	contig050105_12	K01520	dUTP pyrophosphatase [EC:3.6.1.23] [RN:R02100]	contig050105-cat_1_12	contig050105-cat_1	1	M	Pyrimidine deoxyribonuleotide biosynthesis, CDP/CTP => dCDP/dCTP,dTDP/dTTP	MISC	Information systems
contig050128	vOTU019613	contig050128_30	K01520	dUTP pyrophosphatase [EC:3.6.1.23] [RN:R02100]	contig050128-cat_1_30	contig050128-cat_1	2	M	Pyrimidine deoxyribonuleotide biosynthesis, CDP/CTP => dCDP/dCTP,dTDP/dTTP	MISC	Information systems
contig050128	vOTU019613	contig050128_33	K21636	ribonucleoside-triphosphate reductase [EC:1.17.4.2 1.1.98.6] [RN:R02022 R11636]	contig050128-cat_1_33	contig050128-cat_1	2	M	Pyrimidine deoxyribonuleotide biosynthesis, CDP/CTP => dCDP/dCTP,dTDP/dTTP	MISC	Information systems
contig050128	vOTU019613	contig050128_35	K21636	ribonucleoside-triphosphate reductase [EC:1.17.4.2 1.1.98.6] [RN:R02022 R11636]	contig050128-cat_1_35	contig050128-cat_1	2	M	Pyrimidine deoxyribonuleotide biosynthesis, CDP/CTP => dCDP/dCTP,dTDP/dTTP	MISC	Information systems
contig050138	vOTU019620	contig050138_13	K01520	dUTP pyrophosphatase [EC:3.6.1.23] [RN:R02100]	contig050138-cat_1_13	contig050138-cat_1	2	MF	Pyrimidine deoxyribonuleotide biosynthesis, CDP/CTP => dCDP/dCTP,dTDP/dTTP	MISC	Information systems
contig050174	vOTU019643	contig050174_23	K01520	dUTP pyrophosphatase [EC:3.6.1.23] [RN:R02100]	contig050174-cat_2_23	contig050174-cat_2	3	MF	Pyrimidine deoxyribonuleotide biosynthesis, CDP/CTP => dCDP/dCTP,dTDP/dTTP	MISC	Information systems
contig050189	vOTU019653	contig050189_29	K21636	ribonucleoside-triphosphate reductase [EC:1.17.4.2 1.1.98.6] [RN:R02022 R11636]	contig050189-cat_1_29	contig050189-cat_1	1	M	Pyrimidine deoxyribonuleotide biosynthesis, CDP/CTP => dCDP/dCTP,dTDP/dTTP	MISC	Information systems
contig050220	vOTU019671	contig050220_7	K00789	S-adenosylmethionine synthetase [EC:2.5.1.6] [RN:R00177]	contig050220-cat_1_7	contig050220-cat_1	1	MF	Cysteine biosynthesis, methionine => cysteine	Organic Nitrogen	Amino Acid
contig050220	vOTU019671	contig050220_7	K00789	S-adenosylmethionine synthetase [EC:2.5.1.6] [RN:R00177]	contig050220-cat_1_7	contig050220-cat_1	1	MF	Methionine degradation	Organic Nitrogen	Amino Acid
contig050274	vOTU019701	contig050274_27	K21636	ribonucleoside-triphosphate reductase [EC:1.17.4.2 1.1.98.6] [RN:R02022 R11636]	contig050274-cat_1_27	contig050274-cat_1	2	M	Pyrimidine deoxyribonuleotide biosynthesis, CDP/CTP => dCDP/dCTP,dTDP/dTTP	MISC	Information systems
contig050274	vOTU019701	contig050274_29	K01520	dUTP pyrophosphatase [EC:3.6.1.23] [RN:R02100]	contig050274-cat_1_29	contig050274-cat_1	2	M	Pyrimidine deoxyribonuleotide biosynthesis, CDP/CTP => dCDP/dCTP,dTDP/dTTP	MISC	Information systems
contig050430	vOTU019783	contig050430_3	K00558	DNA (cytosine-5-)-methyltransferase [EC:2.1.1.37] [RN:R04858]	contig050430-cat_1_3	contig050430-cat_1	2	MF	Methionine degradation	Organic Nitrogen	Amino Acid
contig050430	vOTU019783	contig050430_16	K01520	dUTP pyrophosphatase [EC:3.6.1.23] [RN:R02100]	contig050430-cat_1_16	contig050430-cat_1	2	M	Pyrimidine deoxyribonuleotide biosynthesis, CDP/CTP => dCDP/dCTP,dTDP/dTTP	MISC	Information systems
contig050441	vOTU019791	contig050441_11	K01520	dUTP pyrophosphatase [EC:3.6.1.23] [RN:R02100]	contig050441-cat_1_11	contig050441-cat_1	2	M	Pyrimidine deoxyribonuleotide biosynthesis, CDP/CTP => dCDP/dCTP,dTDP/dTTP	MISC	Information systems
contig050468	vOTU019808	contig050468_4	K01520	dUTP pyrophosphatase [EC:3.6.1.23] [RN:R02100]	contig050468-cat_1_4	contig050468-cat_1	2	MF	Pyrimidine deoxyribonuleotide biosynthesis, CDP/CTP => dCDP/dCTP,dTDP/dTTP	MISC	Information systems
contig050468	vOTU019808	contig050468_11	K00558	DNA (cytosine-5-)-methyltransferase [EC:2.1.1.37] [RN:R04858]	contig050468-cat_1_11	contig050468-cat_1	2	M	Methionine degradation	Organic Nitrogen	Amino Acid
contig050468	vOTU019808	contig050468_23	K00525	ribonucleoside-diphosphate reductase [EC:1.17.4.1] [RN:R02024]	contig050468-cat_1_23	contig050468-cat_1	2	MKE	Pyrimidine deoxyribonuleotide biosynthesis, CDP/CTP => dCDP/dCTP,dTDP/dTTP	MISC	Information systems
contig050473	vOTU019809	contig050473_49	K01520	dUTP pyrophosphatase [EC:3.6.1.23] [RN:R02100]	contig050473-cat_1_49	contig050473-cat_1	1	M	Pyrimidine deoxyribonuleotide biosynthesis, CDP/CTP => dCDP/dCTP,dTDP/dTTP	MISC	Information systems
contig050473	vOTU019809	contig050473_53	K21636	ribonucleoside-triphosphate reductase [EC:1.17.4.2 1.1.98.6] [RN:R02022 R11636]	contig050473-cat_1_53	contig050473-cat_1	1	M	Pyrimidine deoxyribonuleotide biosynthesis, CDP/CTP => dCDP/dCTP,dTDP/dTTP	MISC	Information systems
contig050473	vOTU019809	contig050473_91	K00558	DNA (cytosine-5-)-methyltransferase [EC:2.1.1.37] [RN:R04858]	contig050473-cat_1_91	contig050473-cat_1	1	M	Methionine degradation	Organic Nitrogen	Amino Acid
contig050572	vOTU019863	contig050572_23	K01494	dCTP deaminase [EC:3.5.4.13] [RN:R02325]	contig050572-cat_1_23	contig050572-cat_1	1	M	Pyrimidine deoxyribonuleotide biosynthesis, CDP/CTP => dCDP/dCTP,dTDP/dTTP	MISC	Information systems
contig050574	vOTU019865	contig050574_2	K01520	dUTP pyrophosphatase [EC:3.6.1.23] [RN:R02100]	contig050574-cat_1_2	contig050574-cat_1	2	MF	Pyrimidine deoxyribonuleotide biosynthesis, CDP/CTP => dCDP/dCTP,dTDP/dTTP	MISC	Information systems
contig050587	vOTU019873	contig050587_6	K01520	dUTP pyrophosphatase [EC:3.6.1.23] [RN:R02100]	contig050587-cat_1_6	contig050587-cat_1	2	MF	Pyrimidine deoxyribonuleotide biosynthesis, CDP/CTP => dCDP/dCTP,dTDP/dTTP	MISC	Information systems
contig050662	vOTU019911	contig050662_33	K01520	dUTP pyrophosphatase [EC:3.6.1.23] [RN:R02100]	contig050662-cat_1_33	contig050662-cat_1	2	M	Pyrimidine deoxyribonuleotide biosynthesis, CDP/CTP => dCDP/dCTP,dTDP/dTTP	MISC	Information systems
contig050662	vOTU019911	contig050662_34	K00560	thymidylate synthase [EC:2.1.1.45] [RN:R02101]	contig050662-cat_1_34	contig050662-cat_1	2	M	Pyrimidine deoxyribonuleotide biosynthesis, CDP/CTP => dCDP/dCTP,dTDP/dTTP	MISC	Information systems
contig050689	vOTU019920	contig050689_12	K00558	DNA (cytosine-5-)-methyltransferase [EC:2.1.1.37] [RN:R04858]	contig050689-cat_1_12	contig050689-cat_1	1	M	Methionine degradation	Organic Nitrogen	Amino Acid
contig050740	vOTU019955	contig050740_35	K21636	ribonucleoside-triphosphate reductase [EC:1.17.4.2 1.1.98.6] [RN:R02022 R11636]	contig050740-cat_1_35	contig050740-cat_1	2	M	Pyrimidine deoxyribonuleotide biosynthesis, CDP/CTP => dCDP/dCTP,dTDP/dTTP	MISC	Information systems
contig050740	vOTU019955	contig050740_51	K01520	dUTP pyrophosphatase [EC:3.6.1.23] [RN:R02100]	contig050740-cat_1_51	contig050740-cat_1	2	M	Pyrimidine deoxyribonuleotide biosynthesis, CDP/CTP => dCDP/dCTP,dTDP/dTTP	MISC	Information systems
contig050747	vOTU019962	contig050747_50	K01520	dUTP pyrophosphatase [EC:3.6.1.23] [RN:R02100]	contig050747-cat_1_50	contig050747-cat_1	1	M	Pyrimidine deoxyribonuleotide biosynthesis, CDP/CTP => dCDP/dCTP,dTDP/dTTP	MISC	Information systems
contig050788	vOTU019991	contig050788_4	K00558	DNA (cytosine-5-)-methyltransferase [EC:2.1.1.37] [RN:R04858]	contig050788-cat_1_4	contig050788-cat_1	2	MF	Methionine degradation	Organic Nitrogen	Amino Acid
contig050826	vOTU020014	contig050826_24	K21636	ribonucleoside-triphosphate reductase [EC:1.17.4.2 1.1.98.6] [RN:R02022 R11636]	contig050826-cat_1_24	contig050826-cat_1	2	M	Pyrimidine deoxyribonuleotide biosynthesis, CDP/CTP => dCDP/dCTP,dTDP/dTTP	MISC	Information systems
contig050826	vOTU020014	contig050826_60	K01520	dUTP pyrophosphatase [EC:3.6.1.23] [RN:R02100]	contig050826-cat_1_60	contig050826-cat_1	2	M	Pyrimidine deoxyribonuleotide biosynthesis, CDP/CTP => dCDP/dCTP,dTDP/dTTP	MISC	Information systems
contig050834	vOTU020018	contig050834_24	K21636	ribonucleoside-triphosphate reductase [EC:1.17.4.2 1.1.98.6] [RN:R02022 R11636]	contig050834-cat_1_24	contig050834-cat_1	1	M	Pyrimidine deoxyribonuleotide biosynthesis, CDP/CTP => dCDP/dCTP,dTDP/dTTP	MISC	Information systems
contig050874	vOTU020049	contig050874_7	K21636	ribonucleoside-triphosphate reductase [EC:1.17.4.2 1.1.98.6] [RN:R02022 R11636]	contig050874-cat_1_7	contig050874-cat_1	2	MF	Pyrimidine deoxyribonuleotide biosynthesis, CDP/CTP => dCDP/dCTP,dTDP/dTTP	MISC	Information systems
contig050934	vOTU020088	contig050934_15	K01520	dUTP pyrophosphatase [EC:3.6.1.23] [RN:R02100]	contig050934-cat_1_15	contig050934-cat_1	1	M	Pyrimidine deoxyribonuleotide biosynthesis, CDP/CTP => dCDP/dCTP,dTDP/dTTP	MISC	Information systems
contig050934	vOTU020088	contig050934_23	K21636	ribonucleoside-triphosphate reductase [EC:1.17.4.2 1.1.98.6] [RN:R02022 R11636]	contig050934-cat_1_23	contig050934-cat_1	1	MF	Pyrimidine deoxyribonuleotide biosynthesis, CDP/CTP => dCDP/dCTP,dTDP/dTTP	MISC	Information systems
contig050992	vOTU020112	contig050992_7	K00789	S-adenosylmethionine synthetase [EC:2.5.1.6] [RN:R00177]	contig050992-cat_1_7	contig050992-cat_1	2	MF	Cysteine biosynthesis, methionine => cysteine	Organic Nitrogen	Amino Acid
contig050992	vOTU020112	contig050992_7	K00789	S-adenosylmethionine synthetase [EC:2.5.1.6] [RN:R00177]	contig050992-cat_1_7	contig050992-cat_1	2	MF	Methionine degradation	Organic Nitrogen	Amino Acid
contig050992	vOTU020112	contig050992_9	K00558	DNA (cytosine-5-)-methyltransferase [EC:2.1.1.37] [RN:R04858]	contig050992-cat_1_9	contig050992-cat_1	2	M	Methionine degradation	Organic Nitrogen	Amino Acid
contig051006	vOTU020119	contig051006_5	K21636	ribonucleoside-triphosphate reductase [EC:1.17.4.2 1.1.98.6] [RN:R02022 R11636]	contig051006-cat_1_5	contig051006-cat_1	2	MF	Pyrimidine deoxyribonuleotide biosynthesis, CDP/CTP => dCDP/dCTP,dTDP/dTTP	MISC	Information systems
contig051006	vOTU020119	contig051006_6	K21636	ribonucleoside-triphosphate reductase [EC:1.17.4.2 1.1.98.6] [RN:R02022 R11636]	contig051006-cat_1_6	contig051006-cat_1	2	MF	Pyrimidine deoxyribonuleotide biosynthesis, CDP/CTP => dCDP/dCTP,dTDP/dTTP	MISC	Information systems
contig051006	vOTU020119	contig051006_11	K01520	dUTP pyrophosphatase [EC:3.6.1.23] [RN:R02100]	contig051006-cat_1_11	contig051006-cat_1	2	M	Pyrimidine deoxyribonuleotide biosynthesis, CDP/CTP => dCDP/dCTP,dTDP/dTTP	MISC	Information systems
contig051139	vOTU020173	contig051139_54	K00525	ribonucleoside-diphosphate reductase [EC:1.17.4.1] [RN:R02024]	contig051139-cat_1_54	contig051139-cat_1	2	MKE	Pyrimidine deoxyribonuleotide biosynthesis, CDP/CTP => dCDP/dCTP,dTDP/dTTP	MISC	Information systems
contig051139	vOTU020173	contig051139_56	K01520	dUTP pyrophosphatase [EC:3.6.1.23] [RN:R02100]	contig051139-cat_1_56	contig051139-cat_1	2	M	Pyrimidine deoxyribonuleotide biosynthesis, CDP/CTP => dCDP/dCTP,dTDP/dTTP	MISC	Information systems
contig051150	vOTU020176	contig051150_28	K01520	dUTP pyrophosphatase [EC:3.6.1.23] [RN:R02100]	contig051150-cat_1_28	contig051150-cat_1	2	M	Pyrimidine deoxyribonuleotide biosynthesis, CDP/CTP => dCDP/dCTP,dTDP/dTTP	MISC	Information systems
contig051250	vOTU020219	contig051250_33	K01520	dUTP pyrophosphatase [EC:3.6.1.23] [RN:R02100]	contig051250-cat_1_33	contig051250-cat_1	2	MF	Pyrimidine deoxyribonuleotide biosynthesis, CDP/CTP => dCDP/dCTP,dTDP/dTTP	MISC	Information systems
contig051291	vOTU020236	contig051291_13	K07173	S-ribosylhomocysteine lyase [EC:4.4.1.21] [RN:R01291]	contig051291-cat_1_13	contig051291-cat_1	2	MF	Cysteine biosynthesis, methionine => cysteine	Organic Nitrogen	Amino Acid
contig051291	vOTU020236	contig051291_14	K01243	S-adenosylhomocysteine/5'-methylthioadenosine nucleosidase [EC:3.2.2.9] [RN:R00194]	contig051291-cat_1_14	contig051291-cat_1	2	MF	Cysteine biosynthesis, methionine => cysteine	Organic Nitrogen	Amino Acid
contig051360	vOTU020260	contig051360_10	K00558	DNA (cytosine-5-)-methyltransferase [EC:2.1.1.37] [RN:R04858]	contig051360-cat_2_10	contig051360-cat_2	3	MF	Methionine degradation	Organic Nitrogen	Amino Acid
contig051423	vOTU020280	contig051423_18	K01494	dCTP deaminase [EC:3.5.4.13] [RN:R02325]	contig051423-cat_1_18	contig051423-cat_1	2	M	Pyrimidine deoxyribonuleotide biosynthesis, CDP/CTP => dCDP/dCTP,dTDP/dTTP	MISC	Information systems
contig051632	vOTU020360	contig051632_13	K00558	DNA (cytosine-5-)-methyltransferase [EC:2.1.1.37] [RN:R04858]	contig051632-cat_1_13	contig051632-cat_1	2	M	Methionine degradation	Organic Nitrogen	Amino Acid
contig051635	vOTU020362	contig051635_11	K21636	ribonucleoside-triphosphate reductase [EC:1.17.4.2 1.1.98.6] [RN:R02022 R11636]	contig051635-cat_1_11	contig051635-cat_1	2	M	Pyrimidine deoxyribonuleotide biosynthesis, CDP/CTP => dCDP/dCTP,dTDP/dTTP	MISC	Information systems
contig051635	vOTU020362	contig051635_112	K01520	dUTP pyrophosphatase [EC:3.6.1.23] [RN:R02100]	contig051635-cat_1_112	contig051635-cat_1	2	MF	Pyrimidine deoxyribonuleotide biosynthesis, CDP/CTP => dCDP/dCTP,dTDP/dTTP	MISC	Information systems
contig051716	vOTU020390	contig051716_19	K01520	dUTP pyrophosphatase [EC:3.6.1.23] [RN:R02100]	contig051716-cat_2_19	contig051716-cat_2	3	M	Pyrimidine deoxyribonuleotide biosynthesis, CDP/CTP => dCDP/dCTP,dTDP/dTTP	MISC	Information systems
contig051807	vOTU020422	contig051807_71	K21636	ribonucleoside-triphosphate reductase [EC:1.17.4.2 1.1.98.6] [RN:R02022 R11636]	contig051807-cat_1_71	contig051807-cat_1	2	MF	Pyrimidine deoxyribonuleotide biosynthesis, CDP/CTP => dCDP/dCTP,dTDP/dTTP	MISC	Information systems
contig051821	vOTU020426	contig051821_31	K01520	dUTP pyrophosphatase [EC:3.6.1.23] [RN:R02100]	contig051821-cat_1_31	contig051821-cat_1	1	M	Pyrimidine deoxyribonuleotide biosynthesis, CDP/CTP => dCDP/dCTP,dTDP/dTTP	MISC	Information systems
contig051954	vOTU020470	contig051954_29	K00558	DNA (cytosine-5-)-methyltransferase [EC:2.1.1.37] [RN:R04858]	contig051954-cat_1_29	contig051954-cat_1	1	M	Methionine degradation	Organic Nitrogen	Amino Acid
contig051965	vOTU020476	contig051965_29	K01494	dCTP deaminase [EC:3.5.4.13] [RN:R02325]	contig051965-cat_1_29	contig051965-cat_1	2	M	Pyrimidine deoxyribonuleotide biosynthesis, CDP/CTP => dCDP/dCTP,dTDP/dTTP	MISC	Information systems
contig052109	vOTU020521	contig052109_15	K01520	dUTP pyrophosphatase [EC:3.6.1.23] [RN:R02100]	contig052109-cat_1_15	contig052109-cat_1	2	M	Pyrimidine deoxyribonuleotide biosynthesis, CDP/CTP => dCDP/dCTP,dTDP/dTTP	MISC	Information systems
contig052149	vOTU020537	contig052149_14	C110	Catlytic type: Cysteine	contig052149-cat_1_14	contig052149-cat_1	2	M	Cysteine endopeptidases	Organic Nitrogen	Peptidase
contig052162	vOTU020542	contig052162_56	K01520	dUTP pyrophosphatase [EC:3.6.1.23] [RN:R02100]	contig052162-cat_2_56	contig052162-cat_2	3	M	Pyrimidine deoxyribonuleotide biosynthesis, CDP/CTP => dCDP/dCTP,dTDP/dTTP	MISC	Information systems
contig052195	vOTU020558	contig052195_21	K01520	dUTP pyrophosphatase [EC:3.6.1.23] [RN:R02100]	contig052195-cat_1_21	contig052195-cat_1	2	M	Pyrimidine deoxyribonuleotide biosynthesis, CDP/CTP => dCDP/dCTP,dTDP/dTTP	MISC	Information systems
contig052217	vOTU020568	contig052217_30	K00656	formate acetyltransferase (pyruvate-formate lyase )	contig052217-cat_1_30	contig052217-cat_1	2	M	pyruvate metabolism	carbon utilization	pyruvate metabolism
contig052227	vOTU020573	contig052227_42	K01520	dUTP pyrophosphatase [EC:3.6.1.23] [RN:R02100]	contig052227-cat_2_42	contig052227-cat_2	3	M	Pyrimidine deoxyribonuleotide biosynthesis, CDP/CTP => dCDP/dCTP,dTDP/dTTP	MISC	Information systems
contig052227	vOTU020573	contig052227_44	K01520	dUTP pyrophosphatase [EC:3.6.1.23] [RN:R02100]	contig052227-cat_2_44	contig052227-cat_2	3	M	Pyrimidine deoxyribonuleotide biosynthesis, CDP/CTP => dCDP/dCTP,dTDP/dTTP	MISC	Information systems
contig052227	vOTU020573	contig052227_49	K21636	ribonucleoside-triphosphate reductase [EC:1.17.4.2 1.1.98.6] [RN:R02022 R11636]	contig052227-cat_2_49	contig052227-cat_2	3	M	Pyrimidine deoxyribonuleotide biosynthesis, CDP/CTP => dCDP/dCTP,dTDP/dTTP	MISC	Information systems
contig052283	vOTU020598	contig052283_46	K21636	ribonucleoside-triphosphate reductase [EC:1.17.4.2 1.1.98.6] [RN:R02022 R11636]	contig052283-cat_1_46	contig052283-cat_1	2	M	Pyrimidine deoxyribonuleotide biosynthesis, CDP/CTP => dCDP/dCTP,dTDP/dTTP	MISC	Information systems
contig052283	vOTU020598	contig052283_48	K21636	ribonucleoside-triphosphate reductase [EC:1.17.4.2 1.1.98.6] [RN:R02022 R11636]	contig052283-cat_1_48	contig052283-cat_1	2	MF	Pyrimidine deoxyribonuleotide biosynthesis, CDP/CTP => dCDP/dCTP,dTDP/dTTP	MISC	Information systems
contig052515	vOTU020696	contig052515_24	K01520	dUTP pyrophosphatase [EC:3.6.1.23] [RN:R02100]	contig052515-cat_2_24	contig052515-cat_2	3	MF	Pyrimidine deoxyribonuleotide biosynthesis, CDP/CTP => dCDP/dCTP,dTDP/dTTP	MISC	Information systems
contig052547	vOTU020709	contig052547_31	K21636	ribonucleoside-triphosphate reductase [EC:1.17.4.2 1.1.98.6] [RN:R02022 R11636]	contig052547-cat_1_31	contig052547-cat_1	1	M	Pyrimidine deoxyribonuleotide biosynthesis, CDP/CTP => dCDP/dCTP,dTDP/dTTP	MISC	Information systems
contig052591	vOTU020729	contig052591_5	K01520	dUTP pyrophosphatase [EC:3.6.1.23] [RN:R02100]	contig052591-cat_1_5	contig052591-cat_1	2	MF	Pyrimidine deoxyribonuleotide biosynthesis, CDP/CTP => dCDP/dCTP,dTDP/dTTP	MISC	Information systems
contig052625	vOTU020747	contig052625_29	K01520	dUTP pyrophosphatase [EC:3.6.1.23] [RN:R02100]	contig052625-cat_1_29	contig052625-cat_1	1	M	Pyrimidine deoxyribonuleotide biosynthesis, CDP/CTP => dCDP/dCTP,dTDP/dTTP	MISC	Information systems
contig052625	vOTU020747	contig052625_30	K21636	ribonucleoside-triphosphate reductase [EC:1.17.4.2 1.1.98.6] [RN:R02022 R11636]	contig052625-cat_1_30	contig052625-cat_1	1	M	Pyrimidine deoxyribonuleotide biosynthesis, CDP/CTP => dCDP/dCTP,dTDP/dTTP	MISC	Information systems
contig052707	vOTU020782	contig052707_15	K00558	DNA (cytosine-5-)-methyltransferase [EC:2.1.1.37] [RN:R04858]	contig052707-cat_2_15	contig052707-cat_2	3	M	Methionine degradation	Organic Nitrogen	Amino Acid
contig052737	vOTU020795	contig052737_33	K01520	dUTP pyrophosphatase [EC:3.6.1.23] [RN:R02100]	contig052737-cat_1_33	contig052737-cat_1	2	M	Pyrimidine deoxyribonuleotide biosynthesis, CDP/CTP => dCDP/dCTP,dTDP/dTTP	MISC	Information systems
contig052737	vOTU020795	contig052737_37	K21636	ribonucleoside-triphosphate reductase [EC:1.17.4.2 1.1.98.6] [RN:R02022 R11636]	contig052737-cat_1_37	contig052737-cat_1	2	M	Pyrimidine deoxyribonuleotide biosynthesis, CDP/CTP => dCDP/dCTP,dTDP/dTTP	MISC	Information systems
contig052739	vOTU020796	contig052739_13	K00558	DNA (cytosine-5-)-methyltransferase [EC:2.1.1.37] [RN:R04858]	contig052739-cat_1_13	contig052739-cat_1	1	M	Methionine degradation	Organic Nitrogen	Amino Acid
contig052785	vOTU020817	contig052785_52	K01520	dUTP pyrophosphatase [EC:3.6.1.23] [RN:R02100]	contig052785-cat_2_52	contig052785-cat_2	3	M	Pyrimidine deoxyribonuleotide biosynthesis, CDP/CTP => dCDP/dCTP,dTDP/dTTP	MISC	Information systems
contig052785	vOTU020817	contig052785_57	K00525	ribonucleoside-diphosphate reductase [EC:1.17.4.1] [RN:R02024]	contig052785-cat_2_57	contig052785-cat_2	3	MKE	Pyrimidine deoxyribonuleotide biosynthesis, CDP/CTP => dCDP/dCTP,dTDP/dTTP	MISC	Information systems
contig052791	vOTU020819	contig052791_16	K00560	thymidylate synthase [EC:2.1.1.45] [RN:R02101]	contig052791-cat_1_16	contig052791-cat_1	2	MF	Pyrimidine deoxyribonuleotide biosynthesis, CDP/CTP => dCDP/dCTP,dTDP/dTTP	MISC	Information systems
contig052818	vOTU020829	contig052818_11	K01520	dUTP pyrophosphatase [EC:3.6.1.23] [RN:R02100]	contig052818-cat_1_11	contig052818-cat_1	1	M	Pyrimidine deoxyribonuleotide biosynthesis, CDP/CTP => dCDP/dCTP,dTDP/dTTP	MISC	Information systems
contig052818	vOTU020829	contig052818_12	K00560	thymidylate synthase [EC:2.1.1.45] [RN:R02101]	contig052818-cat_1_12	contig052818-cat_1	1	M	Pyrimidine deoxyribonuleotide biosynthesis, CDP/CTP => dCDP/dCTP,dTDP/dTTP	MISC	Information systems
contig052917	vOTU021167	contig052917_31	K01494	dCTP deaminase [EC:3.5.4.13] [RN:R02325]	contig052917-cat_2_31	contig052917-cat_2	3	M	Pyrimidine deoxyribonuleotide biosynthesis, CDP/CTP => dCDP/dCTP,dTDP/dTTP	MISC	Information systems
contig052920	vOTU020852	contig052920_6	K00558	DNA (cytosine-5-)-methyltransferase [EC:2.1.1.37] [RN:R04858]	contig052920-cat_2_6	contig052920-cat_2	3	MF	Methionine degradation	Organic Nitrogen	Amino Acid
contig053021	vOTU020873	contig053021_6	K01520	dUTP pyrophosphatase [EC:3.6.1.23] [RN:R02100]	contig053021-cat_2_6	contig053021-cat_2	3	MF	Pyrimidine deoxyribonuleotide biosynthesis, CDP/CTP => dCDP/dCTP,dTDP/dTTP	MISC	Information systems
contig053021	vOTU020873	contig053021_8	K00560	thymidylate synthase [EC:2.1.1.45] [RN:R02101]	contig053021-cat_2_8	contig053021-cat_2	3	MF	Pyrimidine deoxyribonuleotide biosynthesis, CDP/CTP => dCDP/dCTP,dTDP/dTTP	MISC	Information systems
contig053185	vOTU020918	contig053185_20	K00789	S-adenosylmethionine synthetase [EC:2.5.1.6] [RN:R00177]	contig053185-cat_1_20	contig053185-cat_1	2	M	Cysteine biosynthesis, methionine => cysteine	Organic Nitrogen	Amino Acid
contig053185	vOTU020918	contig053185_20	K00789	S-adenosylmethionine synthetase [EC:2.5.1.6] [RN:R00177]	contig053185-cat_1_20	contig053185-cat_1	2	M	Methionine degradation	Organic Nitrogen	Amino Acid
contig053185	vOTU020918	contig053185_22	K00558	DNA (cytosine-5-)-methyltransferase [EC:2.1.1.37] [RN:R04858]	contig053185-cat_1_22	contig053185-cat_1	2	M	Methionine degradation	Organic Nitrogen	Amino Acid
contig053225	vOTU020932	contig053225_42	K01520	dUTP pyrophosphatase [EC:3.6.1.23] [RN:R02100]	contig053225-cat_1_42	contig053225-cat_1	1	M	Pyrimidine deoxyribonuleotide biosynthesis, CDP/CTP => dCDP/dCTP,dTDP/dTTP	MISC	Information systems
contig053225	vOTU020932	contig053225_53	K21636	ribonucleoside-triphosphate reductase [EC:1.17.4.2 1.1.98.6] [RN:R02022 R11636]	contig053225-cat_1_53	contig053225-cat_1	1	M	Pyrimidine deoxyribonuleotide biosynthesis, CDP/CTP => dCDP/dCTP,dTDP/dTTP	MISC	Information systems
contig053225	vOTU020932	contig053225_55	K21636	ribonucleoside-triphosphate reductase [EC:1.17.4.2 1.1.98.6] [RN:R02022 R11636]	contig053225-cat_1_55	contig053225-cat_1	1	M	Pyrimidine deoxyribonuleotide biosynthesis, CDP/CTP => dCDP/dCTP,dTDP/dTTP	MISC	Information systems
contig053251	vOTU020939	contig053251_35	K01520	dUTP pyrophosphatase [EC:3.6.1.23] [RN:R02100]	contig053251-cat_1_35	contig053251-cat_1	1	M	Pyrimidine deoxyribonuleotide biosynthesis, CDP/CTP => dCDP/dCTP,dTDP/dTTP	MISC	Information systems
contig053251	vOTU020939	contig053251_38	K21636	ribonucleoside-triphosphate reductase [EC:1.17.4.2 1.1.98.6] [RN:R02022 R11636]	contig053251-cat_1_38	contig053251-cat_1	1	M	Pyrimidine deoxyribonuleotide biosynthesis, CDP/CTP => dCDP/dCTP,dTDP/dTTP	MISC	Information systems
contig053253	vOTU020941	contig053253_13	K01520	dUTP pyrophosphatase [EC:3.6.1.23] [RN:R02100]	contig053253-cat_1_13	contig053253-cat_1	2	MF	Pyrimidine deoxyribonuleotide biosynthesis, CDP/CTP => dCDP/dCTP,dTDP/dTTP	MISC	Information systems
contig053253	vOTU020941	contig053253_36	K01520	dUTP pyrophosphatase [EC:3.6.1.23] [RN:R02100]	contig053253-cat_1_36	contig053253-cat_1	2	M	Pyrimidine deoxyribonuleotide biosynthesis, CDP/CTP => dCDP/dCTP,dTDP/dTTP	MISC	Information systems
contig053253	vOTU020941	contig053253_38	K21636	ribonucleoside-triphosphate reductase [EC:1.17.4.2 1.1.98.6] [RN:R02022 R11636]	contig053253-cat_1_38	contig053253-cat_1	2	M	Pyrimidine deoxyribonuleotide biosynthesis, CDP/CTP => dCDP/dCTP,dTDP/dTTP	MISC	Information systems
contig053253	vOTU020941	contig053253_48	K01939	adenylosuccinate synthase [EC:6.3.4.4] [RN:R01135]	contig053253-cat_1_48	contig053253-cat_1	2	M	Adenine ribonucleotide biosynthesis, IMP => ADP,ATP	MISC	Information systems
contig053264	vOTU020948	contig053264_33	K21636	ribonucleoside-triphosphate reductase [EC:1.17.4.2 1.1.98.6] [RN:R02022 R11636]	contig053264-cat_1_33	contig053264-cat_1	2	M	Pyrimidine deoxyribonuleotide biosynthesis, CDP/CTP => dCDP/dCTP,dTDP/dTTP	MISC	Information systems
contig053264	vOTU020948	contig053264_36	K01520	dUTP pyrophosphatase [EC:3.6.1.23] [RN:R02100]	contig053264-cat_1_36	contig053264-cat_1	2	M	Pyrimidine deoxyribonuleotide biosynthesis, CDP/CTP => dCDP/dCTP,dTDP/dTTP	MISC	Information systems
contig053277	vOTU020954	contig053277_14	K00525	ribonucleoside-diphosphate reductase [EC:1.17.4.1] [RN:R02024]	contig053277-cat_1_14	contig053277-cat_1	2	MKE	Pyrimidine deoxyribonuleotide biosynthesis, CDP/CTP => dCDP/dCTP,dTDP/dTTP	MISC	Information systems
contig053299	vOTU020962	contig053299_39	K21636	ribonucleoside-triphosphate reductase [EC:1.17.4.2 1.1.98.6] [RN:R02022 R11636]	contig053299-cat_2_39	contig053299-cat_2	3	M	Pyrimidine deoxyribonuleotide biosynthesis, CDP/CTP => dCDP/dCTP,dTDP/dTTP	MISC	Information systems
contig053299	vOTU020962	contig053299_46	K01520	dUTP pyrophosphatase [EC:3.6.1.23] [RN:R02100]	contig053299-cat_2_46	contig053299-cat_2	3	MF	Pyrimidine deoxyribonuleotide biosynthesis, CDP/CTP => dCDP/dCTP,dTDP/dTTP	MISC	Information systems
contig053304	vOTU020966	contig053304_3	K09882	cobS; cobaltochelatase CobS [EC:6.6.1.2]	contig053304-cat_1_3	contig053304-cat_1	2	MF	Cobalamin biosynthesis, precorrin2 => cobinamide	MISC	aerobic corrin ring synthesis
contig053304	vOTU020966	contig053304_4	K09883	cobT; cobaltochelatase CobT [EC:6.6.1.2]	contig053304-cat_1_4	contig053304-cat_1	2	M	Cobalamin biosynthesis, precorrin2 => cobinamide	MISC	aerobic corrin ring synthesis
contig053309	vOTU020968	contig053309_112	K01520	dUTP pyrophosphatase [EC:3.6.1.23] [RN:R02100]	contig053309-cat_1_112	contig053309-cat_1	1	M	Pyrimidine deoxyribonuleotide biosynthesis, CDP/CTP => dCDP/dCTP,dTDP/dTTP	MISC	Information systems
contig053325	vOTU020975	contig053325_43	K00526	ribonucleoside-diphosphate reductase [EC:1.17.4.1] [RN:R02024]	contig053325-cat_1_43	contig053325-cat_1	2	MKE	Pyrimidine deoxyribonuleotide biosynthesis, CDP/CTP => dCDP/dCTP,dTDP/dTTP	MISC	Information systems
contig053325	vOTU020975	contig053325_45	K00525	ribonucleoside-diphosphate reductase [EC:1.17.4.1] [RN:R02024]	contig053325-cat_1_45	contig053325-cat_1	2	MKEF	Pyrimidine deoxyribonuleotide biosynthesis, CDP/CTP => dCDP/dCTP,dTDP/dTTP	MISC	Information systems
contig053369	vOTU021001	contig053369_15	K01520	dUTP pyrophosphatase [EC:3.6.1.23] [RN:R02100]	contig053369-cat_1_15	contig053369-cat_1	2	M	Pyrimidine deoxyribonuleotide biosynthesis, CDP/CTP => dCDP/dCTP,dTDP/dTTP	MISC	Information systems
contig053390	vOTU021017	contig053390_65	K21636	ribonucleoside-triphosphate reductase [EC:1.17.4.2 1.1.98.6] [RN:R02022 R11636]	contig053390-cat_1_65	contig053390-cat_1	1	M	Pyrimidine deoxyribonuleotide biosynthesis, CDP/CTP => dCDP/dCTP,dTDP/dTTP	MISC	Information systems
contig053390	vOTU021017	contig053390_70	K01520	dUTP pyrophosphatase [EC:3.6.1.23] [RN:R02100]	contig053390-cat_1_70	contig053390-cat_1	1	M	Pyrimidine deoxyribonuleotide biosynthesis, CDP/CTP => dCDP/dCTP,dTDP/dTTP	MISC	Information systems
contig053408	vOTU021029	contig053408_15	K00558	DNA (cytosine-5-)-methyltransferase [EC:2.1.1.37] [RN:R04858]	contig053408-cat_1_15	contig053408-cat_1	2	M	Methionine degradation	Organic Nitrogen	Amino Acid
contig053425	vOTU021039	contig053425_10	K00558	DNA (cytosine-5-)-methyltransferase [EC:2.1.1.37] [RN:R04858]	contig053425-cat_1_10	contig053425-cat_1	2	M	Methionine degradation	Organic Nitrogen	Amino Acid
contig053425	vOTU021039	contig053425_31	K00789	S-adenosylmethionine synthetase [EC:2.5.1.6] [RN:R00177]	contig053425-cat_1_31	contig053425-cat_1	2	M	Cysteine biosynthesis, methionine => cysteine	Organic Nitrogen	Amino Acid
contig053425	vOTU021039	contig053425_31	K00789	S-adenosylmethionine synthetase [EC:2.5.1.6] [RN:R00177]	contig053425-cat_1_31	contig053425-cat_1	2	M	Methionine degradation	Organic Nitrogen	Amino Acid
contig053425	vOTU021039	contig053425_33	K00558	DNA (cytosine-5-)-methyltransferase [EC:2.1.1.37] [RN:R04858]	contig053425-cat_1_33	contig053425-cat_1	2	M	Methionine degradation	Organic Nitrogen	Amino Acid
contig053474	vOTU021062	contig053474_17	GT2	GT2 cellulose synthase (EC 2.4.1.12); chitin synthase (EC 2.4.1.16); dolichyl-phosphate beta-D-mannosyltransferase (EC 2.4.1.83); dolichyl-phosphate beta-glucosyltransferase (EC 2.4.1.117); N-acetylglucosaminyltransferase (EC 2.4.1.-); N-acetylgalactosaminyltransferase (EC 2.4.1.-); hyaluronan synthase (EC 2.4.1.212); chitin oligosaccharide synthase (EC 2.4.1.-); beta-1,3-glucan synthase (EC 2.4.…	contig053474-cat_1_17	contig053474-cat_1	2	M	GlycosylTransferases	carbon utilization	CAZY
contig053486	vOTU021069	contig053486_144	K21636	ribonucleoside-triphosphate reductase [EC:1.17.4.2 1.1.98.6] [RN:R02022 R11636]	contig053486-cat_1_144	contig053486-cat_1	1	M	Pyrimidine deoxyribonuleotide biosynthesis, CDP/CTP => dCDP/dCTP,dTDP/dTTP	MISC	Information systems
contig053486	vOTU021069	contig053486_174	K01520	dUTP pyrophosphatase [EC:3.6.1.23] [RN:R02100]	contig053486-cat_1_174	contig053486-cat_1	2	M	Pyrimidine deoxyribonuleotide biosynthesis, CDP/CTP => dCDP/dCTP,dTDP/dTTP	MISC	Information systems
[truncated: 10,011 more rows]
