# Supplementary material for: Global Characterization of the Avian Gut Virome Reveals Extensive Viral Diversity and Functional Implications
Source: Research Square preprint supplement (doi:10.21203/rs.3.rs-6913311/v1), 2025-10-16
Supplement: Supplementary file 4 [file 3cc81f49b0b068cc7de0b580.xlsx]

## Sheet: Supplementary table 4
Supplementary Table S4: Viral-host prediction results.
contig_id	vOTU_id	Host.genome	Host.taxonomy	Main.method	Confidence.score	Additional.methods
contig000012	vOTU000006	GB_GCA_944325615.1	d__Bacteria;p__Cyanobacteriota;c__Vampirovibrionia;o__Gastranaerophilales;f__Gastranaerophilaceae;g__Scatenecus;s__Scatenecus sp944325615	blast	91.8	None
contig000012	vOTU000006	GB_GCA_017631955.1	d__Bacteria;p__Bacillota_A;c__Clostridia;o__Oscillospirales;f__Acutalibacteraceae;g__Fimenecus;s__Fimenecus sp017631955	blast	90.5	iPHoP-RF;73.00
contig000021	vOTU000010	GB_GCA_944323695.1	d__Bacteria;p__Cyanobacteriota;c__Vampirovibrionia;o__Gastranaerophilales;f__Gastranaerophilaceae;g__SIG32;s__SIG32 sp944323695	blast	92.1	iPHoP-RF;83.60
contig000021	vOTU000010	GB_GCA_944391955.1	d__Bacteria;p__Bacillota_A;c__Clostridia;o__TANB77;f__CAG-508;g__UMGS1781;s__UMGS1781 sp944391955	blast	90.9	None
contig000021	vOTU000010	GB_GCA_900552525.1	d__Bacteria;p__Cyanobacteriota;c__Vampirovibrionia;o__Gastranaerophilales;f__Gastranaerophilaceae;g__CAG-196;s__CAG-196 sp002102975	blast	90.6	iPHoP-RF;50.20
contig000021	vOTU000010	GB_GCA_944323995.1	d__Bacteria;p__Cyanobacteriota;c__Vampirovibrionia;o__Gastranaerophilales;f__Gastranaerophilaceae;g__SIG32;s__SIG32 sp944323995	blast	90.5	iPHoP-RF;85.70
contig000027	vOTU000014	RS_GCF_900116045.1	d__Bacteria;p__Desulfobacterota;c__Desulfovibrionia;o__Desulfovibrionales;f__Desulfovibrionaceae;g__Desulfovibrio;s__Desulfovibrio piger_A	CRISPR	98.5	iPHoP-RF;91.40
contig000027	vOTU000014	RS_GCF_000156375.1	d__Bacteria;p__Desulfobacterota;c__Desulfovibrionia;o__Desulfovibrionales;f__Desulfovibrionaceae;g__Desulfovibrio;s__Desulfovibrio piger	CRISPR	97.7	iPHoP-RF;87.60
contig000027	vOTU000014	RS_GCF_012843875.1	d__Bacteria;p__Desulfobacterota;c__Desulfovibrionia;o__Desulfovibrionales;f__Desulfovibrionaceae;g__Desulfovibrio;s__Desulfovibrio sp900556755	iPHoP-RF	96.4	CRISPR;95.30 blast;68.80
contig000027	vOTU000014	GB_GCA_944324525.1	d__Bacteria;p__Desulfobacterota;c__Desulfovibrionia;o__Desulfovibrionales;f__Desulfovibrionaceae;g__Desulfovibrio;s__Desulfovibrio sp944324525	blast	93.5	iPHoP-RF;87.90
contig000027	vOTU000014	MGYG000179013	d__Bacteria;p__Desulfobacterota;c__Desulfovibrionia;o__Desulfovibrionales;f__Desulfovibrionaceae;g__Desulfovibrio;s__	iPHoP-RF	93.1	None
contig000027	vOTU000014	MGYG000269208	d__Bacteria;p__Desulfobacterota;c__Desulfovibrionia;o__Desulfovibrionales;f__Desulfovibrionaceae;g__Desulfovibrio;s__	iPHoP-RF	92.4	None
contig000027	vOTU000014	GB_GCA_944327235.1	d__Bacteria;p__Desulfobacterota;c__Desulfovibrionia;o__Desulfovibrionales;f__Desulfovibrionaceae;g__Desulfovibrio;s__Desulfovibrio sp944327235	iPHoP-RF	92.1	blast;92.00
contig000027	vOTU000014	GB_GCA_944324555.1	d__Bacteria;p__Desulfobacterota;c__Desulfovibrionia;o__Desulfovibrionales;f__Desulfovibrionaceae;g__Desulfovibrio;s__Desulfovibrio sp944324555	iPHoP-RF	91.4	None
contig000027	vOTU000014	GB_GCA_019114565.1	d__Bacteria;p__Desulfobacterota;c__Desulfovibrionia;o__Desulfovibrionales;f__Desulfovibrionaceae;g__Desulfovibrio;s__Desulfovibrio intestinigallinarum	blast	90.8	iPHoP-RF;84.50
contig000039	vOTU000022	RS_GCF_002160765.1	d__Bacteria;p__Bacillota_A;c__Clostridia;o__Lachnospirales;f__Lachnospiraceae;g__Merdisoma;s__Merdisoma faecalis	blast	94.1	iPHoP-RF;88.20 CRISPR;77.50
contig000039	vOTU000022	GB_GCA_944378225.1	d__Bacteria;p__Bacillota_A;c__Clostridia;o__Lachnospirales;f__Lachnospiraceae;g__Merdisoma;s__Merdisoma sp944378225	blast	91.9	iPHoP-RF;87.00
contig000043	vOTU000023	GB_GCA_900543805.1	d__Bacteria;p__Pseudomonadota;c__Gammaproteobacteria;o__Burkholderiales;f__Burkholderiaceae_A;g__Sutterella;s__Sutterella merdavium	blast	93.9	CRISPR;93.60 iPHoP-RF;79.30
contig000043	vOTU000023	GB_GCA_900545275.1	d__Bacteria;p__Pseudomonadota;c__Gammaproteobacteria;o__Burkholderiales;f__Burkholderiaceae_A;g__Sutterella;s__Sutterella sp900545275	blast	93.9	iPHoP-RF;75.90 CRISPR;68.50
contig000043	vOTU000023	MGYG000003914	d__Bacteria;p__Pseudomonadota;c__Gammaproteobacteria;o__Burkholderiales;f__Burkholderiaceae_A;g__Sutterella;s__	blast	92.9	iPHoP-RF;74.30
contig000058	vOTU000028	RS_GCF_002834225.1	d__Bacteria;p__Bacillota_A;c__Clostridia;o__Oscillospirales;f__Acutalibacteraceae;g__Ruminococcus_E;s__Ruminococcus_E bromii	blast	90.7	None
contig000059	vOTU000029	GB_GCA_944384655.1	d__Bacteria;p__Bacillota_A;c__Clostridia;o__Oscillospirales;f__Butyricicoccaceae;g__Butyricicoccus_A;s__Butyricicoccus_A sp944384655	blast	96.2	iPHoP-RF;84.80
contig000060	vOTU000030	GB_GCA_944320485.1	d__Archaea;p__Thermoplasmatota;c__Thermoplasmata;o__Methanomassiliicoccales;f__Methanomethylophilaceae;g__UBA71;s__UBA71 sp944320485	CRISPR	93	iPHoP-RF;82.50
contig000062	vOTU000031	RS_GCF_002161355.1	d__Bacteria;p__Bacillota_A;c__Clostridia;o__Lachnospirales;f__Lachnospiraceae;g__Mediterraneibacter;s__Mediterraneibacter caccavium	blast	93.7	None
contig000062	vOTU000031	RS_GCF_900120155.1	d__Bacteria;p__Bacillota_A;c__Clostridia;o__Lachnospirales;f__Lachnospiraceae;g__Mediterraneibacter;s__Mediterraneibacter sp900120155	blast	92	None
contig000064	vOTU000033	RS_GCF_021531075.1	d__Bacteria;p__Bacteroidota;c__Bacteroidia;o__Bacteroidales;f__Bacteroidaceae;g__Phocaeicola;s__Phocaeicola caecigallinarum_B	iPHoP-RF	96.4	blast;95.00
contig000064	vOTU000033	GB_GCA_944320855.1	d__Bacteria;p__Bacteroidota;c__Bacteroidia;o__Bacteroidales;f__Bacteroidaceae;g__Phocaeicola;s__Phocaeicola sp944320855	iPHoP-RF	96.1	None
contig000064	vOTU000033	RS_GCF_016902295.1	d__Bacteria;p__Bacteroidota;c__Bacteroidia;o__Bacteroidales;f__Bacteroidaceae;g__Phocaeicola;s__Phocaeicola caecigallinarum_A	iPHoP-RF	95.4	blast;95.40
contig000064	vOTU000033	GB_GCA_900544075.1	d__Bacteria;p__Bacteroidota;c__Bacteroidia;o__Bacteroidales;f__Bacteroidaceae;g__Phocaeicola;s__Phocaeicola sp900544075	blast	94.5	iPHoP-RF;91.40
contig000064	vOTU000033	GB_GCA_018884025.1	d__Bacteria;p__Bacteroidota;c__Bacteroidia;o__Bacteroidales;f__Bacteroidaceae;g__Phocaeicola;s__Phocaeicola faecipullorum	blast	94.1	iPHoP-RF;91.10
contig000064	vOTU000033	RS_GCF_000154845.1	d__Bacteria;p__Bacteroidota;c__Bacteroidia;o__Bacteroidales;f__Bacteroidaceae;g__Phocaeicola;s__Phocaeicola coprocola	iPHoP-RF	94.1	blast;92.10
contig000064	vOTU000033	RS_GCF_021530995.1	d__Bacteria;p__Bacteroidota;c__Bacteroidia;o__Bacteroidales;f__Bacteroidaceae;g__Phocaeicola;s__Phocaeicola faecigallinarum	blast	93.9	iPHoP-RF;93.40 CRISPR;67.90
contig000064	vOTU000033	GB_GCA_944322395.1	d__Bacteria;p__Bacteroidota;c__Bacteroidia;o__Bacteroidales;f__Bacteroidaceae;g__Phocaeicola;s__Phocaeicola sp944322395	iPHoP-RF	93.7	None
contig000064	vOTU000033	RS_GCF_016901995.1	d__Bacteria;p__Bacteroidota;c__Bacteroidia;o__Bacteroidales;f__Bacteroidaceae;g__Phocaeicola;s__Phocaeicola sp900066445	iPHoP-RF	93.4	blast;91.70
contig000064	vOTU000033	GB_GCA_944320605.1	d__Bacteria;p__Bacteroidota;c__Bacteroidia;o__Bacteroidales;f__Bacteroidaceae;g__Phocaeicola;s__Phocaeicola sp944320605	blast	93.1	iPHoP-RF;89.50
contig000078	vOTU000040	GB_GCA_900542765.1	d__Bacteria;p__Bacteroidota;c__Bacteroidia;o__Bacteroidales;f__UBA11471;g__UBA11471;s__UBA11471 sp900542765	blast	93.9	iPHoP-RF;63.80
contig000082	vOTU000043	RS_GCF_016902295.1	d__Bacteria;p__Bacteroidota;c__Bacteroidia;o__Bacteroidales;f__Bacteroidaceae;g__Phocaeicola;s__Phocaeicola caecigallinarum_A	blast	94.2	iPHoP-RF;87.60
contig000082	vOTU000043	GB_GCA_944320605.1	d__Bacteria;p__Bacteroidota;c__Bacteroidia;o__Bacteroidales;f__Bacteroidaceae;g__Phocaeicola;s__Phocaeicola sp944320605	blast	93.5	iPHoP-RF;62.20
contig000082	vOTU000043	RS_GCF_021531075.1	d__Bacteria;p__Bacteroidota;c__Bacteroidia;o__Bacteroidales;f__Bacteroidaceae;g__Phocaeicola;s__Phocaeicola caecigallinarum_B	blast	93	iPHoP-RF;78.70
contig000082	vOTU000043	GB_GCA_900544075.1	d__Bacteria;p__Bacteroidota;c__Bacteroidia;o__Bacteroidales;f__Bacteroidaceae;g__Phocaeicola;s__Phocaeicola sp900544075	blast	92.9	iPHoP-RF;89.20
contig000082	vOTU000043	RS_GCF_016901995.1	d__Bacteria;p__Bacteroidota;c__Bacteroidia;o__Bacteroidales;f__Bacteroidaceae;g__Phocaeicola;s__Phocaeicola sp900066445	blast	92.2	iPHoP-RF;90.50
contig000082	vOTU000043	RS_GCF_021530995.1	d__Bacteria;p__Bacteroidota;c__Bacteroidia;o__Bacteroidales;f__Bacteroidaceae;g__Phocaeicola;s__Phocaeicola faecigallinarum	iPHoP-RF	92.1	blast;91.20
contig000082	vOTU000043	GB_GCA_018884025.1	d__Bacteria;p__Bacteroidota;c__Bacteroidia;o__Bacteroidales;f__Bacteroidaceae;g__Phocaeicola;s__Phocaeicola faecipullorum	blast	91.7	iPHoP-RF;89.50
contig000095	vOTU000047	GB_GCA_003521145.1	d__Bacteria;p__Bacillota;c__Bacilli;o__Lactobacillales;f__Streptococcaceae;g__Streptococcus;s__Streptococcus sp003521145	CRISPR	99.7	iPHoP-RF;96.10
contig000095	vOTU000047	RS_GCF_010120595.1	d__Bacteria;p__Bacillota;c__Bacilli;o__Lactobacillales;f__Streptococcaceae;g__Streptococcus;s__Streptococcus thermophilus	CRISPR	99.7	iPHoP-RF;97.10
contig000095	vOTU000047	RS_GCF_900636475.1	d__Bacteria;p__Bacillota;c__Bacilli;o__Lactobacillales;f__Streptococcaceae;g__Streptococcus;s__Streptococcus anginosus	CRISPR	99.7	iPHoP-RF;94.70
contig000095	vOTU000047	GB_GCA_000283635.1	d__Bacteria;p__Bacillota;c__Bacilli;o__Lactobacillales;f__Streptococcaceae;g__Streptococcus;s__Streptococcus macedonicus	CRISPR	99.6	iPHoP-RF;94.40
contig000095	vOTU000047	GB_GCA_010604095.1	d__Bacteria;p__Bacillota;c__Bacilli;o__Lactobacillales;f__Streptococcaceae;g__Streptococcus;s__Streptococcus sp000187445	CRISPR	99.6	iPHoP-RF;96.10
contig000095	vOTU000047	RS_GCF_000154985.1	d__Bacteria;p__Bacillota;c__Bacilli;o__Lactobacillales;f__Streptococcaceae;g__Streptococcus;s__Streptococcus infantarius	CRISPR	99.6	iPHoP-RF;94.10
contig000095	vOTU000047	RS_GCF_000187265.1	d__Bacteria;p__Bacillota;c__Bacilli;o__Lactobacillales;f__Streptococcaceae;g__Streptococcus;s__Streptococcus equinus	CRISPR	99.6	iPHoP-RF;93.10
contig000095	vOTU000047	RS_GCF_000785515.1	d__Bacteria;p__Bacillota;c__Bacilli;o__Lactobacillales;f__Streptococcaceae;g__Streptococcus;s__Streptococcus salivarius	CRISPR	99.6	iPHoP-RF;96.40 blast;96.20
contig000095	vOTU000047	RS_GCF_002000985.1	d__Bacteria;p__Bacillota;c__Bacilli;o__Lactobacillales;f__Streptococcaceae;g__Streptococcus;s__Streptococcus gallolyticus	CRISPR	99.6	iPHoP-RF;95.70
contig000095	vOTU000047	RS_GCF_004843545.1	d__Bacteria;p__Bacillota;c__Bacilli;o__Lactobacillales;f__Streptococcaceae;g__Streptococcus;s__Streptococcus pasteurianus	CRISPR	99.6	iPHoP-RF;94.10
contig000095	vOTU000047	RS_GCF_012277075.1	d__Bacteria;p__Bacillota;c__Bacilli;o__Lactobacillales;f__Streptococcaceae;g__Streptococcus;s__Streptococcus alactolyticus	CRISPR	99.6	iPHoP-RF;88.50
contig000095	vOTU000047	RS_GCF_900459405.1	d__Bacteria;p__Bacillota;c__Bacilli;o__Lactobacillales;f__Streptococcaceae;g__Streptococcus;s__Streptococcus hyointestinalis	CRISPR	99.6	iPHoP-RF;94.40
contig000095	vOTU000047	RS_GCF_900475675.1	d__Bacteria;p__Bacillota;c__Bacilli;o__Lactobacillales;f__Streptococcaceae;g__Streptococcus;s__Streptococcus lutetiensis	CRISPR	99.6	iPHoP-RF;95.40 blast;93.50
contig000095	vOTU000047	RS_GCF_000188055.2	d__Bacteria;p__Bacillota;c__Bacilli;o__Lactobacillales;f__Streptococcaceae;g__Streptococcus;s__Streptococcus urinalis	iPHoP-RF	97.1	blast;90.10
contig000095	vOTU000047	RS_GCF_902167705.1	d__Bacteria;p__Bacillota;c__Bacilli;o__Lactobacillales;f__Streptococcaceae;g__Streptococcus;s__Streptococcus constellatus_A	iPHoP-RF	97.1	None
contig000095	vOTU000047	RS_GCF_000188295.1	d__Bacteria;p__Bacillota;c__Bacilli;o__Lactobacillales;f__Streptococcaceae;g__Streptococcus;s__Streptococcus vestibularis	iPHoP-RF	96.7	blast;91.70
contig000095	vOTU000047	RS_GCF_016461705.1	d__Bacteria;p__Bacillota;c__Bacilli;o__Lactobacillales;f__Streptococcaceae;g__Streptococcus;s__Streptococcus vicugnae	iPHoP-RF	96.7	None
contig000095	vOTU000047	RS_GCF_023167545.1	d__Bacteria;p__Bacillota;c__Bacilli;o__Lactobacillales;f__Streptococcaceae;g__Streptococcus;s__Streptococcus constellatus	iPHoP-RF	96.7	None
contig000095	vOTU000047	RS_GCF_009738225.1	d__Bacteria;p__Bacillota;c__Bacilli;o__Lactobacillales;f__Streptococcaceae;g__Streptococcus;s__Streptococcus sp001556435	iPHoP-RF	96.4	blast;92.90
contig000095	vOTU000047	RS_GCF_900101445.1	d__Bacteria;p__Bacillota;c__Bacilli;o__Lactobacillales;f__Streptococcaceae;g__Streptococcus;s__Streptococcus equinus_B	iPHoP-RF	96.4	None
contig000095	vOTU000047	RS_GCF_000379985.1	d__Bacteria;p__Bacillota;c__Bacilli;o__Lactobacillales;f__Streptococcaceae;g__Streptococcus;s__Streptococcus caballi	iPHoP-RF	96.1	None
contig000095	vOTU000047	RS_GCF_902729355.1	d__Bacteria;p__Bacillota;c__Bacilli;o__Lactobacillales;f__Streptococcaceae;g__Streptococcus;s__Streptococcus sp902729355	iPHoP-RF	96.1	None
contig000095	vOTU000047	RS_GCF_000380105.1	d__Bacteria;p__Bacillota;c__Bacilli;o__Lactobacillales;f__Streptococcaceae;g__Streptococcus;s__Streptococcus orisratti	iPHoP-RF	95.7	None
contig000095	vOTU000047	GB_GCA_934229725.1	d__Bacteria;p__Bacillota;c__Bacilli;o__Lactobacillales;f__Streptococcaceae;g__Streptococcus;s__Streptococcus sp934229725	iPHoP-RF	95.4	None
contig000095	vOTU000047	RS_GCF_003337175.1	d__Bacteria;p__Bacillota;c__Bacilli;o__Lactobacillales;f__Streptococcaceae;g__Streptococcus;s__Streptococcus gallolyticus_B	iPHoP-RF	95.4	None
contig000095	vOTU000047	RS_GCF_015594605.1	d__Bacteria;p__Bacillota;c__Bacilli;o__Lactobacillales;f__Streptococcaceae;g__Streptococcus;s__Streptococcus sp015594605	iPHoP-RF	95.4	None
contig000095	vOTU000047	RS_GCF_000785785.1	d__Bacteria;p__Bacillota;c__Bacilli;o__Lactobacillales;f__Streptococcaceae;g__Streptococcus;s__Streptococcus uberis_A	iPHoP-RF	94.7	None
contig000095	vOTU000047	RS_GCF_002953735.1	d__Bacteria;p__Bacillota;c__Bacilli;o__Lactobacillales;f__Streptococcaceae;g__Streptococcus;s__Streptococcus pluranimalium	iPHoP-RF	94.7	None
contig000095	vOTU000047	RS_GCF_003674745.1	d__Bacteria;p__Bacillota;c__Bacilli;o__Lactobacillales;f__Streptococcaceae;g__Streptococcus;s__Streptococcus iniae	iPHoP-RF	94.7	None
contig000095	vOTU000047	RS_GCF_006739205.1	d__Bacteria;p__Bacillota;c__Bacilli;o__Lactobacillales;f__Streptococcaceae;g__Streptococcus;s__Streptococcus mutans	iPHoP-RF	94.7	None
contig000095	vOTU000047	RS_GCF_011039275.1	d__Bacteria;p__Bacillota;c__Bacilli;o__Lactobacillales;f__Streptococcaceae;g__Streptococcus;s__Streptococcus hyointestinalis_A	iPHoP-RF	94.7	None
contig000095	vOTU000047	RS_GCF_000420785.1	d__Bacteria;p__Bacillota;c__Bacilli;o__Lactobacillales;f__Streptococcaceae;g__Streptococcus;s__Streptococcus hyovaginalis	iPHoP-RF	94.4	None
contig000095	vOTU000047	GB_GCA_934196125.1	d__Bacteria;p__Bacillota;c__Bacilli;o__Lactobacillales;f__Streptococcaceae;g__Streptococcus;s__Streptococcus sp934196125	iPHoP-RF	94.1	None
contig000095	vOTU000047	RS_GCF_009870755.1	d__Bacteria;p__Bacillota;c__Bacilli;o__Lactobacillales;f__Streptococcaceae;g__Streptococcus;s__Streptococcus halichoeri	iPHoP-RF	94.1	None
contig000095	vOTU000047	RS_GCF_000380085.1	d__Bacteria;p__Bacillota;c__Bacilli;o__Lactobacillales;f__Streptococcaceae;g__Streptococcus;s__Streptococcus merionis	iPHoP-RF	93.7	None
contig000095	vOTU000047	RS_GCF_001598035.1	d__Bacteria;p__Bacillota;c__Bacilli;o__Lactobacillales;f__Streptococcaceae;g__Streptococcus;s__Streptococcus halotolerans	iPHoP-RF	93.7	None
contig000095	vOTU000047	RS_GCF_002055535.1	d__Bacteria;p__Bacillota;c__Bacilli;o__Lactobacillales;f__Streptococcaceae;g__Streptococcus;s__Streptococcus pyogenes	iPHoP-RF	93.7	None
contig000095	vOTU000047	RS_GCF_002355215.1	d__Bacteria;p__Bacillota;c__Bacilli;o__Lactobacillales;f__Streptococcaceae;g__Streptococcus;s__Streptococcus troglodytae	iPHoP-RF	93.7	None
contig000095	vOTU000047	RS_GCF_012396585.1	d__Bacteria;p__Bacillota;c__Bacilli;o__Lactobacillales;f__Streptococcaceae;g__Streptococcus;s__Streptococcus ovuberis	iPHoP-RF	93.7	None
contig000095	vOTU000047	RS_GCF_016908655.1	d__Bacteria;p__Bacillota;c__Bacilli;o__Lactobacillales;f__Streptococcaceae;g__Streptococcus;s__Streptococcus saliviloxodontae	iPHoP-RF	93.7	None
contig000095	vOTU000047	RS_GCF_900459225.1	d__Bacteria;p__Bacillota;c__Bacilli;o__Lactobacillales;f__Streptococcaceae;g__Streptococcus;s__Streptococcus dysgalactiae	iPHoP-RF	93.7	None
contig000095	vOTU000047	RS_GCF_003086355.1	d__Bacteria;p__Bacillota;c__Bacilli;o__Lactobacillales;f__Streptococcaceae;g__Streptococcus;s__Streptococcus chenjunshii	iPHoP-RF	93.4	None
contig000095	vOTU000047	RS_GCF_001697145.1	d__Bacteria;p__Bacillota;c__Bacilli;o__Lactobacillales;f__Streptococcaceae;g__Streptococcus;s__Streptococcus anginosus_C	iPHoP-RF	93.1	None
contig000095	vOTU000047	RS_GCF_001302265.1	d__Bacteria;p__Bacillota;c__Bacilli;o__Lactobacillales;f__Streptococcaceae;g__Streptococcus;s__Streptococcus phocae	iPHoP-RF	92.8	None
contig000095	vOTU000047	RS_GCF_900636575.1	d__Bacteria;p__Bacillota;c__Bacilli;o__Lactobacillales;f__Streptococcaceae;g__Streptococcus;s__Streptococcus canis	iPHoP-RF	92.8	None
contig000095	vOTU000047	RS_GCF_000423745.1	d__Bacteria;p__Bacillota;c__Bacilli;o__Lactobacillales;f__Streptococcaceae;g__Streptococcus;s__Streptococcus plurextorum	iPHoP-RF	92.4	None
contig000095	vOTU000047	RS_GCF_003686955.1	d__Bacteria;p__Bacillota;c__Bacilli;o__Lactobacillales;f__Streptococcaceae;g__Streptococcus;s__Streptococcus hillyeri	iPHoP-RF	92.4	None
contig000095	vOTU000047	RS_GCF_001578885.1	d__Bacteria;p__Bacillota;c__Bacilli;o__Lactobacillales;f__Streptococcaceae;g__Streptococcus;s__Streptococcus sp001578885	iPHoP-RF	91.8	None
contig000095	vOTU000047	RS_GCF_000188015.2	d__Bacteria;p__Bacillota;c__Bacilli;o__Lactobacillales;f__Streptococcaceae;g__Streptococcus;s__Streptococcus ictaluri	iPHoP-RF	91.4	None
contig000095	vOTU000047	RS_GCF_000425025.1	d__Bacteria;p__Bacillota;c__Bacilli;o__Lactobacillales;f__Streptococcaceae;g__Streptococcus;s__Streptococcus castoreus	iPHoP-RF	91.4	None
contig000095	vOTU000047	RS_GCF_001431045.1	d__Bacteria;p__Bacillota;c__Bacilli;o__Lactobacillales;f__Streptococcaceae;g__Streptococcus;s__Streptococcus orisasini	iPHoP-RF	91.1	None
contig000095	vOTU000047	RS_GCF_000372425.1	d__Bacteria;p__Bacillota;c__Bacilli;o__Lactobacillales;f__Streptococcaceae;g__Streptococcus;s__Streptococcus ferus	iPHoP-RF	90.5	None
contig000119	vOTU000052	RS_GCF_002160815.1	d__Bacteria;p__Bacillota;c__Bacilli;o__Erysipelotrichales;f__Coprobacillaceae;g__Massilimicrobiota;s__Massilimicrobiota merdigallinarum	blast	96.3	iPHoP-RF;88.90
contig000120	vOTU000053	GB_GCA_017555455.1	d__Bacteria;p__Bacillota_A;c__Clostridia;o__Lachnospirales;f__Lachnospiraceae;g__SFDP01;s__SFDP01 sp017555455	blast	93.5	iPHoP-RF;79.50
contig000144	vOTU000063	GB_GCA_019119265.1	d__Bacteria;p__Bacillota_A;c__Clostridia;o__Lachnospirales;f__Lachnospiraceae;g__Mediterraneibacter;s__Mediterraneibacter intestinigallinarum	blast	92.6	None
contig000144	vOTU000063	GB_GCA_019119675.1	d__Bacteria;p__Bacillota_A;c__Clostridia;o__Lachnospirales;f__Lachnospiraceae;g__Mediterraneibacter;s__Mediterraneibacter faecipullorum	blast	92.1	iPHoP-RF;53.30
contig000144	vOTU000063	GB_GCA_944386295.1	d__Bacteria;p__Bacillota_A;c__Clostridia;o__Oscillospirales;f__UBA644;g__CALXAO01;s__CALXAO01 sp944386295	blast	90.3	None
contig000196	vOTU108632	GB_GCA_019119355.1	d__Bacteria;p__Bacillota_A;c__Clostridia;o__Lachnospirales;f__Lachnospiraceae;g__Eisenbergiella;s__Eisenbergiella merdigallinarum	blast	92.3	None
contig000196	vOTU108632	RS_GCF_900604355.1	d__Bacteria;p__Bacillota_A;c__Clostridia;o__Lachnospirales;f__Lachnospiraceae;g__Luxibacter;s__Luxibacter massiliensis	blast	92.1	None
contig000197	vOTU061438	RS_GCF_000025985.1	d__Bacteria;p__Bacteroidota;c__Bacteroidia;o__Bacteroidales;f__Bacteroidaceae;g__Bacteroides;s__Bacteroides fragilis	CRISPR	98.9	iPHoP-RF;96.70
contig000197	vOTU061438	GB_GCA_000432735.1	d__Bacteria;p__Bacteroidota;c__Bacteroidia;o__Bacteroidales;f__Bacteroidaceae;g__Phocaeicola;s__Phocaeicola sp000432735	CRISPR	98.8	iPHoP-RF;83.10
contig000197	vOTU061438	RS_GCF_000012825.1	d__Bacteria;p__Bacteroidota;c__Bacteroidia;o__Bacteroidales;f__Bacteroidaceae;g__Phocaeicola;s__Phocaeicola vulgatus	CRISPR	98.8	iPHoP-RF;88.50 blast;84.90
contig000197	vOTU061438	RS_GCF_000382445.1	d__Bacteria;p__Bacteroidota;c__Bacteroidia;o__Bacteroidales;f__Bacteroidaceae;g__Phocaeicola;s__Phocaeicola massiliensis	CRISPR	98.8	iPHoP-RF;87.30
contig000197	vOTU061438	MGYG000300646	d__Bacteria;p__Bacteroidota;c__Bacteroidia;o__Bacteroidales;f__Bacteroidaceae;g__Phocaeicola;s__	CRISPR	98.7	iPHoP-RF;85.70
contig000197	vOTU061438	RS_GCF_900128495.1	d__Bacteria;p__Bacteroidota;c__Bacteroidia;o__Bacteroidales;f__Bacteroidaceae;g__Phocaeicola;s__Phocaeicola ilei	CRISPR	98.7	blast;87.30 iPHoP-RF;78.50
contig000197	vOTU061438	RS_GCF_000187895.1	d__Bacteria;p__Bacteroidota;c__Bacteroidia;o__Bacteroidales;f__Bacteroidaceae;g__Phocaeicola;s__Phocaeicola plebeius	iPHoP-RF	97.1	blast;93.40
contig000197	vOTU061438	RS_GCF_003437535.1	d__Bacteria;p__Bacteroidota;c__Bacteroidia;o__Bacteroidales;f__Bacteroidaceae;g__Phocaeicola;s__Phocaeicola plebeius_A	iPHoP-RF	97.1	blast;92.20
contig000197	vOTU061438	RS_GCF_900106755.1	d__Bacteria;p__Bacteroidota;c__Bacteroidia;o__Bacteroidales;f__Bacteroidaceae;g__Bacteroides;s__Bacteroides faecis	iPHoP-RF	97.1	None
contig000197	vOTU061438	RS_GCF_000011065.1	d__Bacteria;p__Bacteroidota;c__Bacteroidia;o__Bacteroidales;f__Bacteroidaceae;g__Bacteroides;s__Bacteroides thetaiotaomicron	iPHoP-RF	96.7	None
contig000197	vOTU061438	GB_GCA_905215555.1	d__Bacteria;p__Bacteroidota;c__Bacteroidia;o__Bacteroidales;f__Bacteroidaceae;g__Bacteroides;s__Bacteroides sp905215555	iPHoP-RF	96.4	None
contig000197	vOTU061438	RS_GCF_900142015.1	d__Bacteria;p__Bacteroidota;c__Bacteroidia;o__Bacteroidales;f__Bacteroidaceae;g__Bacteroides;s__Bacteroides stercorirosoris	iPHoP-RF	96.4	None
contig000197	vOTU061438	RS_GCF_000157915.1	d__Bacteria;p__Bacteroidota;c__Bacteroidia;o__Bacteroidales;f__Bacteroidaceae;g__Phocaeicola;s__Phocaeicola coprophilus	blast	96.1	iPHoP-RF;91.10
contig000197	vOTU061438	RS_GCF_019239235.1	d__Bacteria;p__Bacteroidota;c__Bacteroidia;o__Bacteroidales;f__Bacteroidaceae;g__Mediterranea;s__Mediterranea pullorum	CRISPR	96.1	iPHoP-RF;87.90
contig000197	vOTU061438	RS_GCF_001688725.2	d__Bacteria;p__Bacteroidota;c__Bacteroidia;o__Bacteroidales;f__Bacteroidaceae;g__Bacteroides;s__Bacteroides caecimuris	iPHoP-RF	95.7	None
contig000197	vOTU061438	RS_GCF_003464595.1	d__Bacteria;p__Bacteroidota;c__Bacteroidia;o__Bacteroidales;f__Bacteroidaceae;g__Bacteroides;s__Bacteroides intestinalis_A	iPHoP-RF	95.4	None
contig000197	vOTU061438	RS_GCF_024623065.1	d__Bacteria;p__Bacteroidota;c__Bacteroidia;o__Bacteroidales;f__Bacteroidaceae;g__Bacteroides;s__Bacteroides acidifaciens	iPHoP-RF	95.4	None
contig000197	vOTU061438	RS_GCF_000315485.1	d__Bacteria;p__Bacteroidota;c__Bacteroidia;o__Bacteroidales;f__Bacteroidaceae;g__Bacteroides;s__Bacteroides oleiciplenus	iPHoP-RF	95.1	None
contig000197	vOTU061438	GB_GCA_905207245.1	d__Bacteria;p__Bacteroidota;c__Bacteroidia;o__Bacteroidales;f__Bacteroidaceae;g__Bacteroides;s__Bacteroides sp905207245	iPHoP-RF	94.1	None
contig000197	vOTU061438	RS_GCF_900129655.1	d__Bacteria;p__Bacteroidota;c__Bacteroidia;o__Bacteroidales;f__Bacteroidaceae;g__Bacteroides;s__Bacteroides clarus	iPHoP-RF	93.7	None
contig000197	vOTU061438	RS_GCF_900130125.1	d__Bacteria;p__Bacteroidota;c__Bacteroidia;o__Bacteroidales;f__Bacteroidaceae;g__Bacteroides;s__Bacteroides congonensis	iPHoP-RF	93.4	None
contig000197	vOTU061438	GB_GCA_900761785.1	d__Bacteria;p__Bacteroidota;c__Bacteroidia;o__Bacteroidales;f__Bacteroidaceae;g__Bacteroides;s__Bacteroides sp900761785	iPHoP-RF	93.1	None
contig000197	vOTU061438	RS_GCF_902364365.1	d__Bacteria;p__Bacteroidota;c__Bacteroidia;o__Bacteroidales;f__Bacteroidaceae;g__Bacteroides;s__Bacteroides sp900556215	iPHoP-RF	93.1	None
contig000197	vOTU061438	RS_GCF_000186225.1	d__Bacteria;p__Bacteroidota;c__Bacteroidia;o__Bacteroidales;f__Bacteroidaceae;g__Bacteroides;s__Bacteroides helcogenes	iPHoP-RF	92.8	None
contig000197	vOTU061438	RS_GCF_012113595.1	d__Bacteria;p__Bacteroidota;c__Bacteroidia;o__Bacteroidales;f__Bacteroidaceae;g__Bacteroides;s__Bacteroides sp012113595	iPHoP-RF	92.8	None
contig000197	vOTU061438	RS_GCF_014750685.1	d__Bacteria;p__Bacteroidota;c__Bacteroidia;o__Bacteroidales;f__Bacteroidaceae;g__Bacteroides;s__Bacteroides sp014750685	iPHoP-RF	92.8	None
contig000197	vOTU061438	RS_GCF_004793475.1	d__Bacteria;p__Bacteroidota;c__Bacteroidia;o__Bacteroidales;f__Bacteroidaceae;g__Bacteroides;s__Bacteroides sp002491635	iPHoP-RF	92.4	None
contig000197	vOTU061438	MGYG000250372	d__Bacteria;p__Bacteroidota;c__Bacteroidia;o__Bacteroidales;f__Bacteroidaceae;g__Phocaeicola;s__	iPHoP-RF	91.8	None
contig000197	vOTU061438	RS_GCF_018390535.1	d__Bacteria;p__Bacteroidota;c__Bacteroidia;o__Bacteroidales;f__Bacteroidaceae;g__Bacteroides;s__Bacteroides propionicigenes	iPHoP-RF	91.4	None
contig000197	vOTU061438	RS_GCF_000374365.1	d__Bacteria;p__Bacteroidota;c__Bacteroidia;o__Bacteroidales;f__Bacteroidaceae;g__Bacteroides;s__Bacteroides gallinarum	iPHoP-RF	91.1	None
contig000197	vOTU061438	RS_GCF_020091405.1	d__Bacteria;p__Bacteroidota;c__Bacteroidia;o__Bacteroidales;f__Bacteroidaceae;g__Bacteroides;s__Bacteroides sp900552405	iPHoP-RF	90.8	None
contig000197	vOTU061438	GB_GCA_025146565.1	d__Bacteria;p__Bacteroidota;c__Bacteroidia;o__Bacteroidales;f__Bacteroidaceae;g__Bacteroides;s__Bacteroides eggerthii	iPHoP-RF	90.5	None
contig000197	vOTU061438	GB_GCA_900553185.1	d__Bacteria;p__Bacteroidota;c__Bacteroidia;o__Bacteroidales;f__Bacteroidaceae;g__Phocaeicola;s__Phocaeicola sp900553185	blast	90.2	iPHoP-RF;87.60
contig000206	vOTU000310	RS_GCF_012277075.1	d__Bacteria;p__Bacillota;c__Bacilli;o__Lactobacillales;f__Streptococcaceae;g__Streptococcus;s__Streptococcus alactolyticus	blast	95.8	iPHoP-RF;67.00
contig000206	vOTU000310	RS_GCF_900475675.1	d__Bacteria;p__Bacillota;c__Bacilli;o__Lactobacillales;f__Streptococcaceae;g__Streptococcus;s__Streptococcus lutetiensis	blast	95.4	iPHoP-RF;88.20
contig000206	vOTU000310	RS_GCF_000154985.1	d__Bacteria;p__Bacillota;c__Bacilli;o__Lactobacillales;f__Streptococcaceae;g__Streptococcus;s__Streptococcus infantarius	blast	92.8	iPHoP-RF;72.80
contig000206	vOTU000310	RS_GCF_019794555.1	d__Bacteria;p__Bacillota;c__Bacilli;o__Lactobacillales;f__Streptococcaceae;g__Streptococcus;s__Streptococcus suis_AB	blast	90.5	iPHoP-RF;71.10
contig000209	vOTU000084	GB_GCA_900544075.1	d__Bacteria;p__Bacteroidota;c__Bacteroidia;o__Bacteroidales;f__Bacteroidaceae;g__Phocaeicola;s__Phocaeicola sp900544075	CRISPR	99	iPHoP-RF;90.80 blast;86.10
contig000209	vOTU000084	GB_GCA_944322395.1	d__Bacteria;p__Bacteroidota;c__Bacteroidia;o__Bacteroidales;f__Bacteroidaceae;g__Phocaeicola;s__Phocaeicola sp944322395	CRISPR	99	iPHoP-RF;87.00
contig000209	vOTU000084	RS_GCF_016901995.1	d__Bacteria;p__Bacteroidota;c__Bacteroidia;o__Bacteroidales;f__Bacteroidaceae;g__Phocaeicola;s__Phocaeicola sp900066445	CRISPR	99	iPHoP-RF;93.70 blast;89.20
contig000209	vOTU000084	RS_GCF_021530995.1	d__Bacteria;p__Bacteroidota;c__Bacteroidia;o__Bacteroidales;f__Bacteroidaceae;g__Phocaeicola;s__Phocaeicola faecigallinarum	CRISPR	99	iPHoP-RF;91.80 blast;86.20
contig000209	vOTU000084	GB_GCA_900551445.1	d__Bacteria;p__Bacteroidota;c__Bacteroidia;o__Bacteroidales;f__Bacteroidaceae;g__Phocaeicola;s__Phocaeicola sp900551445	CRISPR	98.9	iPHoP-RF;93.70
contig000209	vOTU000084	RS_GCF_000154845.1	d__Bacteria;p__Bacteroidota;c__Bacteroidia;o__Bacteroidales;f__Bacteroidaceae;g__Phocaeicola;s__Phocaeicola coprocola	CRISPR	98.9	iPHoP-RF;96.40 blast;76.50
contig000209	vOTU000084	RS_GCF_003437535.1	d__Bacteria;p__Bacteroidota;c__Bacteroidia;o__Bacteroidales;f__Bacteroidaceae;g__Phocaeicola;s__Phocaeicola plebeius_A	CRISPR	98.9	iPHoP-RF;97.10 blast;96.90
contig000209	vOTU000084	GB_GCA_900542985.1	d__Bacteria;p__Bacteroidota;c__Bacteroidia;o__Bacteroidales;f__Bacteroidaceae;g__Phocaeicola;s__Phocaeicola sp900542985	iPHoP-RF	97.1	blast;86.00
contig000209	vOTU000084	RS_GCF_000187895.1	d__Bacteria;p__Bacteroidota;c__Bacteroidia;o__Bacteroidales;f__Bacteroidaceae;g__Phocaeicola;s__Phocaeicola plebeius	iPHoP-RF	97.1	blast;91.80
contig000209	vOTU000084	GB_GCA_902362595.1	d__Bacteria;p__Bacteroidota;c__Bacteroidia;o__Bacteroidales;f__Bacteroidaceae;g__Phocaeicola;s__Phocaeicola merdigallinarum	iPHoP-RF	96.7	blast;89.20
contig000209	vOTU000084	GB_GCA_944320855.1	d__Bacteria;p__Bacteroidota;c__Bacteroidia;o__Bacteroidales;f__Bacteroidaceae;g__Phocaeicola;s__Phocaeicola sp944320855	iPHoP-RF	95.4	None
contig000209	vOTU000084	GB_GCA_000432735.1	d__Bacteria;p__Bacteroidota;c__Bacteroidia;o__Bacteroidales;f__Bacteroidaceae;g__Phocaeicola;s__Phocaeicola sp000432735	iPHoP-RF	95.1	blast;68.10
contig000209	vOTU000084	GB_GCA_905198575.1	d__Bacteria;p__Bacteroidota;c__Bacteroidia;o__Bacteroidales;f__Bacteroidaceae;g__Phocaeicola;s__Phocaeicola sp905198575	iPHoP-RF	93.4	blast;83.30
contig000209	vOTU000084	RS_GCF_000374585.1	d__Bacteria;p__Bacteroidota;c__Bacteroidia;o__Bacteroidales;f__Bacteroidaceae;g__Phocaeicola;s__Phocaeicola barnesiae	iPHoP-RF	93.4	blast;73.20
contig000209	vOTU000084	RS_GCF_021531075.1	d__Bacteria;p__Bacteroidota;c__Bacteroidia;o__Bacteroidales;f__Bacteroidaceae;g__Phocaeicola;s__Phocaeicola caecigallinarum_B	iPHoP-RF	93.4	None
contig000209	vOTU000084	GB_GCA_018884025.1	d__Bacteria;p__Bacteroidota;c__Bacteroidia;o__Bacteroidales;f__Bacteroidaceae;g__Phocaeicola;s__Phocaeicola faecipullorum	iPHoP-RF	93.1	blast;86.40
contig000209	vOTU000084	MGYG000152515	d__Bacteria;p__Bacteroidota;c__Bacteroidia;o__Bacteroidales;f__Bacteroidaceae;g__Phocaeicola;s__	iPHoP-RF	93.1	None
contig000209	vOTU000084	RS_GCF_903181435.1	d__Bacteria;p__Bacteroidota;c__Bacteroidia;o__Bacteroidales;f__Bacteroidaceae;g__Bacteroides;s__Bacteroides sp900765785	iPHoP-RF	92.1	None
contig000213	vOTU000086	GB_GCA_944326115.1	d__Bacteria;p__Cyanobacteriota;c__Vampirovibrionia;o__Gastranaerophilales;f__Gastranaerophilaceae;g__Limenecus;s__Limenecus sp944326115	blast	91.6	None
contig000213	vOTU000086	GB_GCA_944325045.1	d__Bacteria;p__Cyanobacteriota;c__Vampirovibrionia;o__Gastranaerophilales;f__Gastranaerophilaceae;g__UBA1221;s__UBA1221 sp944325045	blast	91.2	None
contig000223	vOTU000221	RS_GCF_019754295.1	d__Bacteria;p__Bacillota_A;c__Clostridia;o__Lachnospirales;f__Lachnospiraceae;g__Sellimonas;s__Sellimonas caecigallum	blast	92.8	iPHoP-RF;64.50
contig000223	vOTU000221	GB_GCA_018715775.1	d__Bacteria;p__Bacillota_A;c__Clostridia;o__Lachnospirales;f__Lachnospiraceae;g__Fimousia;s__Fimousia stercorigallinarum	blast	90	iPHoP-RF;51.70
contig000226	vOTU000584	RS_GCF_000012825.1	d__Bacteria;p__Bacteroidota;c__Bacteroidia;o__Bacteroidales;f__Bacteroidaceae;g__Phocaeicola;s__Phocaeicola vulgatus	CRISPR	99.6	iPHoP-RF;54.60
contig000226	vOTU000584	RS_GCF_000210075.1	d__Bacteria;p__Bacteroidota;c__Bacteroidia;o__Bacteroidales;f__Bacteroidaceae;g__Bacteroides;s__Bacteroides xylanisolvens	CRISPR	99.6	iPHoP-RF;70.40
contig000226	vOTU000584	RS_GCF_000158035.1	d__Bacteria;p__Bacteroidota;c__Bacteroidia;o__Bacteroidales;f__Bacteroidaceae;g__Bacteroides;s__Bacteroides cellulosilyticus	CRISPR	99.5	iPHoP-RF;65.80
contig000226	vOTU000584	RS_GCF_016901995.1	d__Bacteria;p__Bacteroidota;c__Bacteroidia;o__Bacteroidales;f__Bacteroidaceae;g__Phocaeicola;s__Phocaeicola sp900066445	CRISPR	99.5	iPHoP-RF;85.10
contig000226	vOTU000584	GB_GCA_900544075.1	d__Bacteria;p__Bacteroidota;c__Bacteroidia;o__Bacteroidales;f__Bacteroidaceae;g__Phocaeicola;s__Phocaeicola sp900544075	CRISPR	99.4	iPHoP-RF;87.60
contig000226	vOTU000584	RS_GCF_020091405.1	d__Bacteria;p__Bacteroidota;c__Bacteroidia;o__Bacteroidales;f__Bacteroidaceae;g__Bacteroides;s__Bacteroides sp900552405	CRISPR	99.4	iPHoP-RF;63.00
contig000226	vOTU000584	GB_GCA_025147485.1	d__Bacteria;p__Bacteroidota;c__Bacteroidia;o__Bacteroidales;f__Bacteroidaceae;g__Bacteroides;s__Bacteroides uniformis	CRISPR	99.3	iPHoP-RF;78.00
contig000226	vOTU000584	RS_GCF_016900355.1	d__Bacteria;p__Bacteroidota;c__Bacteroidia;o__Bacteroidales;f__Bacteroidaceae;g__Phocaeicola;s__Phocaeicola sp900551065	CRISPR	99.3	iPHoP-RF;87.90
contig000226	vOTU000584	RS_GCF_021530995.1	d__Bacteria;p__Bacteroidota;c__Bacteroidia;o__Bacteroidales;f__Bacteroidaceae;g__Phocaeicola;s__Phocaeicola faecigallinarum	CRISPR	99.3	iPHoP-RF;87.00
contig000226	vOTU000584	GB_GCA_902362595.1	d__Bacteria;p__Bacteroidota;c__Bacteroidia;o__Bacteroidales;f__Bacteroidaceae;g__Phocaeicola;s__Phocaeicola merdigallinarum	CRISPR	99	iPHoP-RF;85.10
contig000226	vOTU000584	RS_GCF_000154845.1	d__Bacteria;p__Bacteroidota;c__Bacteroidia;o__Bacteroidales;f__Bacteroidaceae;g__Phocaeicola;s__Phocaeicola coprocola	CRISPR	99	iPHoP-RF;71.50
contig000226	vOTU000584	RS_GCF_000157915.1	d__Bacteria;p__Bacteroidota;c__Bacteroidia;o__Bacteroidales;f__Bacteroidaceae;g__Phocaeicola;s__Phocaeicola coprophilus	CRISPR	99	iPHoP-RF;83.30
contig000226	vOTU000584	RS_GCF_000187895.1	d__Bacteria;p__Bacteroidota;c__Bacteroidia;o__Bacteroidales;f__Bacteroidaceae;g__Phocaeicola;s__Phocaeicola plebeius	CRISPR	99	iPHoP-RF;80.00
contig000226	vOTU000584	RS_GCF_003437535.1	d__Bacteria;p__Bacteroidota;c__Bacteroidia;o__Bacteroidales;f__Bacteroidaceae;g__Phocaeicola;s__Phocaeicola plebeius_A	CRISPR	99	iPHoP-RF;82.50
contig000226	vOTU000584	RS_GCF_019239235.1	d__Bacteria;p__Bacteroidota;c__Bacteroidia;o__Bacteroidales;f__Bacteroidaceae;g__Mediterranea;s__Mediterranea pullorum	CRISPR	97.5	iPHoP-RF;57.10
contig000227	vOTU062101	RS_GCF_002159495.1	d__Bacteria;p__Actinomycetota;c__Coriobacteriia;o__Coriobacteriales;f__Atopobiaceae;g__Thermophilibacter;s__Thermophilibacter sp002159495	blast	92.8	iPHoP-RF;70.00
contig000227	vOTU062101	GB_GCA_019117265.1	d__Bacteria;p__Actinomycetota;c__Coriobacteriia;o__Coriobacteriales;f__Atopobiaceae;g__Thermophilibacter;s__Thermophilibacter pullicola	blast	91.7	iPHoP-RF;66.50
contig000234	vOTU000093	GB_GCA_944321985.1	d__Archaea;p__Thermoplasmatota;c__Thermoplasmata;o__Methanomassiliicoccales;f__Methanomethylophilaceae;g__UBA71;s__UBA71 sp944321985	blast	94.4	iPHoP-RF;73.00
contig000234	vOTU000093	GB_GCA_009911715.1	d__Archaea;p__Thermoplasmatota;c__Thermoplasmata;o__Methanomassiliicoccales;f__Methanomethylophilaceae;g__UBA71;s__UBA71 sp006954425	blast	93.3	iPHoP-RF;80.60
contig000248	vOTU000099	RS_GCF_900021155.1	d__Bacteria;p__Bacteroidota;c__Bacteroidia;o__Bacteroidales;f__Rikenellaceae;g__Alistipes;s__Alistipes excrementavium	blast	90.6	None
contig000263	vOTU000105	GB_GCA_000283635.1	d__Bacteria;p__Bacillota;c__Bacilli;o__Lactobacillales;f__Streptococcaceae;g__Streptococcus;s__Streptococcus macedonicus	CRISPR	99	iPHoP-RF;91.40
contig000263	vOTU000105	RS_GCF_000154985.1	d__Bacteria;p__Bacillota;c__Bacilli;o__Lactobacillales;f__Streptococcaceae;g__Streptococcus;s__Streptococcus infantarius	CRISPR	99	iPHoP-RF;95.10 blast;90.70
contig000263	vOTU000105	RS_GCF_004843545.1	d__Bacteria;p__Bacillota;c__Bacilli;o__Lactobacillales;f__Streptococcaceae;g__Streptococcus;s__Streptococcus pasteurianus	CRISPR	99	blast;96.70 iPHoP-RF;82.50
contig000263	vOTU000105	RS_GCF_900475675.1	d__Bacteria;p__Bacillota;c__Bacilli;o__Lactobacillales;f__Streptococcaceae;g__Streptococcus;s__Streptococcus lutetiensis	CRISPR	98.9	blast;96.50 iPHoP-RF;95.10
contig000263	vOTU000105	RS_GCF_000785515.1	d__Bacteria;p__Bacillota;c__Bacilli;o__Lactobacillales;f__Streptococcaceae;g__Streptococcus;s__Streptococcus salivarius	CRISPR	98.8	iPHoP-RF;67.70
contig000263	vOTU000105	RS_GCF_009738225.1	d__Bacteria;p__Bacillota;c__Bacilli;o__Lactobacillales;f__Streptococcaceae;g__Streptococcus;s__Streptococcus sp001556435	CRISPR	98.7	iPHoP-RF;68.60
contig000263	vOTU000105	RS_GCF_019929345.1	d__Bacteria;p__Bacillota;c__Bacilli;o__Lactobacillales;f__Streptococcaceae;g__Streptococcus;s__Streptococcus sp015256435	CRISPR	98.5	iPHoP-RF;91.80
contig000263	vOTU000105	RS_GCF_012277075.1	d__Bacteria;p__Bacillota;c__Bacilli;o__Lactobacillales;f__Streptococcaceae;g__Streptococcus;s__Streptococcus alactolyticus	CRISPR	98.2	blast;96.30 iPHoP-RF;92.10
contig000263	vOTU000105	RS_GCF_003337175.1	d__Bacteria;p__Bacillota;c__Bacilli;o__Lactobacillales;f__Streptococcaceae;g__Streptococcus;s__Streptococcus gallolyticus_B	blast	96.2	iPHoP-RF;91.10
contig000263	vOTU000105	RS_GCF_900101445.1	d__Bacteria;p__Bacillota;c__Bacilli;o__Lactobacillales;f__Streptococcaceae;g__Streptococcus;s__Streptococcus equinus_B	iPHoP-RF	95.4	None
contig000263	vOTU000105	RS_GCF_900636475.1	d__Bacteria;p__Bacillota;c__Bacilli;o__Lactobacillales;f__Streptococcaceae;g__Streptococcus;s__Streptococcus anginosus	iPHoP-RF	94.4	None
contig000263	vOTU000105	RS_GCF_900104225.1	d__Bacteria;p__Bacillota;c__Bacilli;o__Lactobacillales;f__Streptococcaceae;g__Streptococcus;s__Streptococcus equinus_D	iPHoP-RF	94.1	None
contig000263	vOTU000105	RS_GCF_001697145.1	d__Bacteria;p__Bacillota;c__Bacilli;o__Lactobacillales;f__Streptococcaceae;g__Streptococcus;s__Streptococcus anginosus_C	iPHoP-RF	93.7	None
contig000263	vOTU000105	GB_GCA_934196125.1	d__Bacteria;p__Bacillota;c__Bacilli;o__Lactobacillales;f__Streptococcaceae;g__Streptococcus;s__Streptococcus sp934196125	iPHoP-RF	92.4	None
contig000263	vOTU000105	RS_GCF_002087075.1	d__Bacteria;p__Bacillota;c__Bacilli;o__Lactobacillales;f__Streptococcaceae;g__Streptococcus;s__Streptococcus pseudopneumoniae	iPHoP-RF	92.4	None
contig000263	vOTU000105	RS_GCF_005844455.1	d__Bacteria;p__Bacillota;c__Bacilli;o__Lactobacillales;f__Streptococcaceae;g__Streptococcus;s__Streptococcus mitis_BF	iPHoP-RF	92.4	None
contig000263	vOTU000105	RS_GCF_023167545.1	d__Bacteria;p__Bacillota;c__Bacilli;o__Lactobacillales;f__Streptococcaceae;g__Streptococcus;s__Streptococcus constellatus	iPHoP-RF	92.4	None
contig000263	vOTU000105	RS_GCF_000187745.1	d__Bacteria;p__Bacillota;c__Bacilli;o__Lactobacillales;f__Streptococcaceae;g__Streptococcus;s__Streptococcus sp000187745	iPHoP-RF	91.1	None
contig000263	vOTU000105	RS_GCF_000722775.1	d__Bacteria;p__Bacillota;c__Bacilli;o__Lactobacillales;f__Streptococcaceae;g__Streptococcus;s__Streptococcus mitis_AV	iPHoP-RF	91.1	None
contig000263	vOTU000105	RS_GCF_001113365.1	d__Bacteria;p__Bacillota;c__Bacilli;o__Lactobacillales;f__Streptococcaceae;g__Streptococcus;s__Streptococcus pneumoniae_C	iPHoP-RF	91.1	None
contig000263	vOTU000105	GB_GCA_000344275.1	d__Bacteria;p__Bacillota;c__Bacilli;o__Lactobacillales;f__Streptococcaceae;g__Streptococcus;s__Streptococcus oralis_E	iPHoP-RF	90.8	None
contig000263	vOTU000105	GB_GCA_905221375.1	d__Bacteria;p__Bacillota;c__Bacilli;o__Lactobacillales;f__Streptococcaceae;g__Streptococcus;s__Streptococcus sp905221375	iPHoP-RF	90.8	None
contig000263	vOTU000105	RS_GCF_001070715.1	d__Bacteria;p__Bacillota;c__Bacilli;o__Lactobacillales;f__Streptococcaceae;g__Streptococcus;s__Streptococcus pseudopneumoniae_H	iPHoP-RF	90.8	None
contig000263	vOTU000105	RS_GCF_024295825.1	d__Bacteria;p__Bacillota;c__Bacilli;o__Lactobacillales;f__Streptococcaceae;g__Streptococcus;s__Streptococcus sp024295825	iPHoP-RF	90.8	None
contig000263	vOTU000105	RS_GCF_902167705.1	d__Bacteria;p__Bacillota;c__Bacilli;o__Lactobacillales;f__Streptococcaceae;g__Streptococcus;s__Streptococcus constellatus_A	iPHoP-RF	90.8	None
contig000263	vOTU000105	RS_GCF_000413475.1	d__Bacteria;p__Bacillota;c__Bacilli;o__Lactobacillales;f__Streptococcaceae;g__Streptococcus;s__Streptococcus intermedius	iPHoP-RF	90.1	None
contig000263	vOTU000105	RS_GCF_019794555.1	d__Bacteria;p__Bacillota;c__Bacilli;o__Lactobacillales;f__Streptococcaceae;g__Streptococcus;s__Streptococcus suis_AB	blast	90.1	iPHoP-RF;84.50
contig000271	vOTU000110	GB_GCA_944383645.1	d__Bacteria;p__Bacillota_A;c__Clostridia;o__Lachnospirales;f__Lachnospiraceae;g__Merdisoma;s__Merdisoma sp944383645	CRISPR	98.9	iPHoP-RF;73.50
contig000271	vOTU000110	RS_GCF_002160765.1	d__Bacteria;p__Bacillota_A;c__Clostridia;o__Lachnospirales;f__Lachnospiraceae;g__Merdisoma;s__Merdisoma faecalis	CRISPR	98.9	blast;95.70 iPHoP-RF;89.80
contig000271	vOTU000110	RS_GCF_002160825.1	d__Bacteria;p__Bacillota_A;c__Clostridia;o__Lachnospirales;f__Lachnospiraceae;g__Merdisoma;s__Merdisoma sp002160825	CRISPR	98.9	iPHoP-RF;83.90
contig000271	vOTU000110	RS_GCF_002160135.1	d__Bacteria;p__Bacillota_A;c__Clostridia;o__Lachnospirales;f__Lachnospiraceae;g__Choladocola;s__Choladocola avistercoris	CRISPR	90	None
contig000275	vOTU000111	GB_GCA_019114985.1	d__Bacteria;p__Bacillota_A;c__Clostridia;o__Lachnospirales;f__Lachnospiraceae;g__Anaerostipes;s__Anaerostipes excrementavium	blast	98.2	iPHoP-RF;66.50
contig000275	vOTU000111	RS_GCF_016586355.1	d__Bacteria;p__Bacillota_A;c__Clostridia;o__Lachnospirales;f__Lachnospiraceae;g__Anaerostipes;s__Anaerostipes butyraticus	blast	91	None
contig000276	vOTU000112	GB_GCA_019112765.1	d__Bacteria;p__Bacillota_A;c__Clostridia;o__Lachnospirales;f__Lachnospiraceae;g__Mediterraneibacter;s__Mediterraneibacter norwichensis	CRISPR	97.1	iPHoP-RF;72.20
contig000276	vOTU000112	GB_GCA_930972465.1	d__Bacteria;p__Bacillota_A;c__Clostridia;o__Lachnospirales;f__Lachnospiraceae;g__Mediterraneibacter;s__Mediterraneibacter stercoravium	CRISPR	96.9	iPHoP-RF;66.50
contig000276	vOTU000112	GB_GCA_019117305.1	d__Bacteria;p__Bacillota_A;c__Clostridia;o__Lachnospirales;f__Lachnospiraceae;g__Mediterraneibacter;s__Mediterraneibacter merdigallinarum	CRISPR	96.7	blast;89.10 iPHoP-RF;71.10
contig000276	vOTU000112	RS_GCF_000153925.1	d__Bacteria;p__Bacillota_A;c__Clostridia;o__Lachnospirales;f__Lachnospiraceae;g__Mediterraneibacter;s__Mediterraneibacter torques	blast	95.9	iPHoP-RF;60.30
contig000276	vOTU000112	GB_GCA_019115385.1	d__Bacteria;p__Bacillota_A;c__Clostridia;o__Lachnospirales;f__Lachnospiraceae;g__Mediterraneibacter;s__Mediterraneibacter avicola	CRISPR	95.3	iPHoP-RF;64.80
contig000276	vOTU000112	GB_GCA_900751785.1	d__Bacteria;p__Bacillota_A;c__Clostridia;o__Lachnospirales;f__Lachnospiraceae;g__Mediterraneibacter;s__Mediterraneibacter faecigallinarum	CRISPR	95.1	blast;90.60 iPHoP-RF;76.40
contig000276	vOTU000112	RS_GCF_016902345.1	d__Bacteria;p__Bacillota_A;c__Clostridia;o__Lachnospirales;f__Lachnospiraceae;g__Mediterraneibacter;s__Mediterraneibacter glycyrrhizinilyticus_A	CRISPR	94.5	blast;88.50 iPHoP-RF;61.10
contig000276	vOTU000112	GB_GCA_910589385.1	d__Bacteria;p__Bacillota_A;c__Clostridia;o__Lachnospirales;f__Lachnospiraceae;g__Schaedlerella;s__Schaedlerella sp910589385	iPHoP-RF	94.1	None
contig000276	vOTU000112	GB_GCA_904419285.1	d__Bacteria;p__Bacillota_A;c__Clostridia;o__Lachnospirales;f__Lachnospiraceae;g__Mediterraneibacter;s__Mediterraneibacter caccogallinarum	CRISPR	93.9	iPHoP-RF;74.60
contig000276	vOTU000112	GB_GCA_019112785.1	d__Bacteria;p__Bacillota_A;c__Clostridia;o__Lachnospirales;f__Lachnospiraceae;g__Blautia;s__Blautia stercorigallinarum	CRISPR	92.1	None
contig000276	vOTU000112	GB_GCA_019418195.1	d__Bacteria;p__Bacillota_A;c__Clostridia;o__Lachnospirales;f__Lachnospiraceae;g__Mediterraneibacter;s__Mediterraneibacter sp019418195	blast	92	iPHoP-RF;63.80
contig000276	vOTU000112	RS_GCF_002160525.1	d__Bacteria;p__Bacillota_A;c__Clostridia;o__Lachnospirales;f__Lachnospiraceae;g__Mediterraneibacter;s__Mediterraneibacter cottocaccae	blast	91.9	iPHoP-RF;66.80
contig000276	vOTU000112	GB_GCA_019119675.1	d__Bacteria;p__Bacillota_A;c__Clostridia;o__Lachnospirales;f__Lachnospiraceae;g__Mediterraneibacter;s__Mediterraneibacter faecipullorum	blast	91.7	iPHoP-RF;63.80
contig000276	vOTU000112	GB_GCA_000403295.2	d__Bacteria;p__Bacillota_A;c__Clostridia;o__Lachnospirales;f__Lachnospiraceae;g__Schaedlerella;s__Schaedlerella sp000403295	iPHoP-RF	91.1	None
contig000276	vOTU000112	RS_GCF_008691045.1	d__Bacteria;p__Bacillota_A;c__Clostridia;o__Lachnospirales;f__Lachnospiraceae;g__Mediterraneibacter;s__Mediterraneibacter catenae	blast	91	iPHoP-RF;63.30
contig000276	vOTU000112	GB_GCA_944384505.1	d__Bacteria;p__Bacillota_A;c__Clostridia;o__Lachnospirales;f__Lachnospiraceae;g__Mediterraneibacter;s__Mediterraneibacter sp944384505	blast	90.6	iPHoP-RF;63.50
contig000276	vOTU000112	GB_GCA_009911175.1	d__Bacteria;p__Bacillota_A;c__Clostridia;o__Lachnospirales;f__Lachnospiraceae;g__Schaedlerella;s__Schaedlerella sp009911175	iPHoP-RF	90.1	None
contig000279	vOTU000113	GB_GCA_018714695.1	d__Bacteria;p__Bacillota_A;c__Clostridia;o__UBA1381;f__UBA1381;g__Ornithomonoglobus;s__Ornithomonoglobus merdipullorum	blast	95.2	iPHoP-RF;57.60
contig000283	vOTU000115	GB_GCA_944324935.1	d__Bacteria;p__Desulfobacterota;c__Desulfovibrionia;o__Desulfovibrionales;f__Desulfovibrionaceae;g__Desulfovibrio;s__Desulfovibrio sp944324935	blast	93.9	iPHoP-RF;90.10
contig000291	vOTU000119	GB_GCA_003573975.1	d__Bacteria;p__Bacillota_A;c__Clostridia;o__Oscillospirales;f__Oscillospiraceae;g__Lawsonibacter;s__Lawsonibacter sp900066825	blast	91.7	None
contig000291	vOTU000119	RS_GCF_020687245.1	d__Bacteria;p__Bacillota_A;c__Clostridia;o__Oscillospirales;f__Ruminococcaceae;g__Faecalibacterium;s__Faecalibacterium longum	blast	90.8	None
contig000297	vOTU000122	RS_GCF_014337155.1	d__Bacteria;p__Bacillota_A;c__Clostridia;o__Lachnospirales;f__Lachnospiraceae;g__Wujia;s__Wujia chipingensis	blast	91.1	iPHoP-RF;61.40
contig000297	vOTU000122	GB_GCA_944326115.1	d__Bacteria;p__Cyanobacteriota;c__Vampirovibrionia;o__Gastranaerophilales;f__Gastranaerophilaceae;g__Limenecus;s__Limenecus sp944326115	blast	90.7	None
contig000303	vOTU000124	GB_GCA_944388105.1	d__Bacteria;p__Bacillota_A;c__Clostridia;o__Oscillospirales;f__Ruminococcaceae;g__Gemmiger;s__Gemmiger sp944388105	blast	92	iPHoP-RF;83.60
contig000303	vOTU000124	GB_GCA_905214345.1	d__Bacteria;p__Bacillota_A;c__Clostridia;o__Oscillospirales;f__Ruminococcaceae;g__Gemmiger;s__Gemmiger sp905214345	blast	91.4	iPHoP-RF;85.40
contig000303	vOTU000124	GB_GCA_019116445.1	d__Bacteria;p__Bacillota_A;c__Clostridia;o__Oscillospirales;f__Ruminococcaceae;g__Gemmiger;s__Gemmiger excrementigallinarum	blast	90.9	iPHoP-RF;78.50
contig000303	vOTU000124	GB_GCA_944382835.1	d__Bacteria;p__Bacillota_A;c__Clostridia;o__Oscillospirales;f__Ruminococcaceae;g__Gemmiger;s__Gemmiger sp944382835	iPHoP-RF	90.8	None
contig000303	vOTU000124	GB_GCA_002306375.1	d__Bacteria;p__Bacillota_A;c__Clostridia;o__Oscillospirales;f__Ruminococcaceae;g__Gemmiger;s__Gemmiger sp002306375	blast	90.1	iPHoP-RF;83.30
contig000307	vOTU000126	GB_GCA_019114345.1	d__Bacteria;p__Bacillota_A;c__Clostridia;o__Oscillospirales;f__Butyricicoccaceae;g__Agathobaculum;s__Agathobaculum pullistercoris	blast	96.8	iPHoP-RF;68.40
contig000307	vOTU000126	GB_GCA_003096535.1	d__Bacteria;p__Bacillota_A;c__Clostridia;o__Oscillospirales;f__Butyricicoccaceae;g__Agathobaculum;s__Agathobaculum butyriciproducens	blast	96.3	iPHoP-RF;72.40
contig000307	vOTU000126	GB_GCA_019113065.1	d__Bacteria;p__Bacillota_A;c__Clostridia;o__Oscillospirales;f__Butyricicoccaceae;g__Agathobaculum;s__Agathobaculum stercoravium	blast	94.4	iPHoP-RF;82.20
contig000307	vOTU000126	GB_GCA_019117485.1	d__Bacteria;p__Bacillota_A;c__Clostridia;o__Oscillospirales;f__Butyricicoccaceae;g__Agathobaculum;s__Agathobaculum intestinipullorum	blast	93.8	iPHoP-RF;65.10
contig000307	vOTU000126	RS_GCF_900625105.1	d__Bacteria;p__Bacillota_A;c__Clostridia;o__Oscillospirales;f__Butyricicoccaceae;g__Agathobaculum;s__Agathobaculum sp900625105	blast	91.7	iPHoP-RF;52.50
contig000312	vOTU000128	GB_GCA_900544075.1	d__Bacteria;p__Bacteroidota;c__Bacteroidia;o__Bacteroidales;f__Bacteroidaceae;g__Phocaeicola;s__Phocaeicola sp900544075	blast	93	iPHoP-RF;68.00
contig000312	vOTU000128	GB_GCA_944320855.1	d__Bacteria;p__Bacteroidota;c__Bacteroidia;o__Bacteroidales;f__Bacteroidaceae;g__Phocaeicola;s__Phocaeicola sp944320855	blast	92.5	iPHoP-RF;67.00
contig000312	vOTU000128	RS_GCF_021530995.1	d__Bacteria;p__Bacteroidota;c__Bacteroidia;o__Bacteroidales;f__Bacteroidaceae;g__Phocaeicola;s__Phocaeicola faecigallinarum	blast	92	iPHoP-RF;73.00
contig000312	vOTU000128	GB_GCA_944322395.1	d__Bacteria;p__Bacteroidota;c__Bacteroidia;o__Bacteroidales;f__Bacteroidaceae;g__Phocaeicola;s__Phocaeicola sp944322395	blast	91.9	iPHoP-RF;67.00
contig000312	vOTU000128	RS_GCF_021531075.1	d__Bacteria;p__Bacteroidota;c__Bacteroidia;o__Bacteroidales;f__Bacteroidaceae;g__Phocaeicola;s__Phocaeicola caecigallinarum_B	blast	91.8	iPHoP-RF;75.20
contig000312	vOTU000128	RS_GCF_000233955.1	d__Bacteria;p__Bacteroidota;c__Bacteroidia;o__Bacteroidales;f__Bacteroidaceae;g__Paraprevotella;s__Paraprevotella clara	blast	90.9	None
contig000313	vOTU000129	RS_GCF_001983955.1	d__Bacteria;p__Bacillota;c__Bacilli;o__Lactobacillales;f__Streptococcaceae;g__Streptococcus;s__Streptococcus oralis_H	CRISPR	99.2	iPHoP-RF;75.20
contig000313	vOTU000129	RS_GCF_002093545.1	d__Bacteria;p__Bacillota;c__Bacilli;o__Lactobacillales;f__Streptococcaceae;g__Streptococcus;s__Streptococcus oralis_C	CRISPR	99.2	iPHoP-RF;72.20
contig000313	vOTU000129	RS_GCF_016127915.1	d__Bacteria;p__Bacillota;c__Bacilli;o__Lactobacillales;f__Streptococcaceae;g__Streptococcus;s__Streptococcus oralis_BO	CRISPR	99.2	iPHoP-RF;78.00
contig000313	vOTU000129	RS_GCF_016775005.1	d__Bacteria;p__Bacillota;c__Bacilli;o__Lactobacillales;f__Streptococcaceae;g__Streptococcus;s__Streptococcus suis_X	CRISPR	99.2	iPHoP-RF;77.10
contig000313	vOTU000129	RS_GCF_003943515.1	d__Bacteria;p__Bacillota;c__Bacilli;o__Lactobacillales;f__Streptococcaceae;g__Streptococcus;s__Streptococcus cristatus_D	CRISPR	99.1	iPHoP-RF;80.60
contig000313	vOTU000129	GB_GCA_000283635.1	d__Bacteria;p__Bacillota;c__Bacilli;o__Lactobacillales;f__Streptococcaceae;g__Streptococcus;s__Streptococcus macedonicus	CRISPR	99	iPHoP-RF;94.10
contig000313	vOTU000129	RS_GCF_000154985.1	d__Bacteria;p__Bacillota;c__Bacilli;o__Lactobacillales;f__Streptococcaceae;g__Streptococcus;s__Streptococcus infantarius	CRISPR	99	blast;96.50 iPHoP-RF;95.40
contig000313	vOTU000129	RS_GCF_000187265.1	d__Bacteria;p__Bacillota;c__Bacilli;o__Lactobacillales;f__Streptococcaceae;g__Streptococcus;s__Streptococcus equinus	CRISPR	99	iPHoP-RF;93.40
contig000313	vOTU000129	RS_GCF_002000985.1	d__Bacteria;p__Bacillota;c__Bacilli;o__Lactobacillales;f__Streptococcaceae;g__Streptococcus;s__Streptococcus gallolyticus	CRISPR	99	iPHoP-RF;94.40
contig000313	vOTU000129	RS_GCF_004843545.1	d__Bacteria;p__Bacillota;c__Bacilli;o__Lactobacillales;f__Streptococcaceae;g__Streptococcus;s__Streptococcus pasteurianus	CRISPR	99	blast;96.70 iPHoP-RF;93.70
contig000313	vOTU000129	RS_GCF_009738225.1	d__Bacteria;p__Bacillota;c__Bacilli;o__Lactobacillales;f__Streptococcaceae;g__Streptococcus;s__Streptococcus sp001556435	CRISPR	99	iPHoP-RF;86.00
contig000313	vOTU000129	RS_GCF_900475675.1	d__Bacteria;p__Bacillota;c__Bacilli;o__Lactobacillales;f__Streptococcaceae;g__Streptococcus;s__Streptococcus lutetiensis	CRISPR	99	blast;96.40 iPHoP-RF;95.40
contig000313	vOTU000129	RS_GCF_000372425.1	d__Bacteria;p__Bacillota;c__Bacilli;o__Lactobacillales;f__Streptococcaceae;g__Streptococcus;s__Streptococcus ferus	CRISPR	98.9	None
contig000313	vOTU000129	RS_GCF_012277075.1	d__Bacteria;p__Bacillota;c__Bacilli;o__Lactobacillales;f__Streptococcaceae;g__Streptococcus;s__Streptococcus alactolyticus	CRISPR	98.5	blast;89.80 iPHoP-RF;87.60
contig000313	vOTU000129	RS_GCF_900104225.1	d__Bacteria;p__Bacillota;c__Bacilli;o__Lactobacillales;f__Streptococcaceae;g__Streptococcus;s__Streptococcus equinus_D	iPHoP-RF	94.4	None
contig000313	vOTU000129	GB_GCA_934196125.1	d__Bacteria;p__Bacillota;c__Bacilli;o__Lactobacillales;f__Streptococcaceae;g__Streptococcus;s__Streptococcus sp934196125	iPHoP-RF	94.1	None
contig000313	vOTU000129	RS_GCF_900101445.1	d__Bacteria;p__Bacillota;c__Bacilli;o__Lactobacillales;f__Streptococcaceae;g__Streptococcus;s__Streptococcus equinus_B	iPHoP-RF	94.1	blast;90.40
contig000313	vOTU000129	RS_GCF_003337175.1	d__Bacteria;p__Bacillota;c__Bacilli;o__Lactobacillales;f__Streptococcaceae;g__Streptococcus;s__Streptococcus gallolyticus_B	iPHoP-RF	93.7	None
contig000314	vOTU000130	GB_GCA_944350015.1	d__Bacteria;p__Bacillota_A;c__Clostridia;o__Christensenellales;f__UBA1242;g__Caccovivens;s__Caccovivens sp944350015	CRISPR	99	iPHoP-RF;82.20
contig000314	vOTU000130	MGYG000308849	d__Bacteria;p__Bacillota_A;c__Clostridia;o__Christensenellales;f__UBA1242;g__Caccovivens;s__	CRISPR	99	iPHoP-RF;81.40
contig000314	vOTU000130	MGYG000309552	d__Bacteria;p__Bacillota_A;c__Clostridia;o__Christensenellales;f__UBA1242;g__Caccovivens;s__	CRISPR	99	iPHoP-RF;82.80
contig000314	vOTU000130	MGYG000319660	d__Bacteria;p__Bacillota_A;c__Clostridia;o__Christensenellales;f__UBA1242;g__Caccovivens;s__	CRISPR	99	iPHoP-RF;82.20
contig000314	vOTU000130	GB_GCA_900557645.1	d__Bacteria;p__Bacillota_A;c__Clostridia;o__Christensenellales;f__UBA1242;g__Caccovivens;s__Caccovivens sp900557645	CRISPR	98.9	iPHoP-RF;63.80
contig000314	vOTU000130	GB_GCA_944383405.1	d__Bacteria;p__Bacillota_A;c__Clostridia;o__Christensenellales;f__UBA1242;g__UBA7862;s__UBA7862 sp944383405	blast	94.3	iPHoP-RF;57.90
contig000320	vOTU000133	GB_GCA_900761925.1	d__Bacteria;p__Bacillota_A;c__Clostridia;o__Lachnospirales;f__Lachnospiraceae;g__HGM12545;s__HGM12545 sp900761925	blast	92.2	None
contig000323	vOTU000135	RS_GCF_000157915.1	d__Bacteria;p__Bacteroidota;c__Bacteroidia;o__Bacteroidales;f__Bacteroidaceae;g__Phocaeicola;s__Phocaeicola coprophilus	blast	93.9	iPHoP-RF;82.50
contig000323	vOTU000135	RS_GCF_000012825.1	d__Bacteria;p__Bacteroidota;c__Bacteroidia;o__Bacteroidales;f__Bacteroidaceae;g__Phocaeicola;s__Phocaeicola vulgatus	blast	92.7	iPHoP-RF;81.60
contig000331	vOTU000137	GB_GCA_019415945.1	d__Bacteria;p__Bacillota_A;c__Clostridia;o__Oscillospirales;f__Acutalibacteraceae;g__Ruminococcus_E;s__Ruminococcus_E sp019415945	blast	93.6	iPHoP-RF;71.10
contig000331	vOTU000137	GB_GCA_944412525.1	d__Bacteria;p__Bacillota_A;c__Clostridia;o__Oscillospirales;f__Acutalibacteraceae;g__Ruminococcus_E;s__Ruminococcus_E sp944412525	blast	92.2	iPHoP-RF;70.20
contig000341	vOTU000139	GB_GCA_944392595.1	d__Bacteria;p__Pseudomonadota;c__Alphaproteobacteria;o__Rs-D84;f__Rs-D84;g__Enterousia;s__Enterousia sp944392595	blast	93.6	iPHoP-RF;69.50
contig000341	vOTU000139	GB_GCA_944392775.1	d__Bacteria;p__Pseudomonadota;c__Alphaproteobacteria;o__Rs-D84;f__Rs-D84;g__Enterousia;s__Enterousia sp944392775	blast	91.7	iPHoP-RF;86.00
contig000341	vOTU000139	GB_GCA_944389535.1	d__Bacteria;p__Pseudomonadota;c__Alphaproteobacteria;o__Rs-D84;f__Rs-D84;g__Enterousia;s__Enterousia sp944389535	blast	91	iPHoP-RF;64.00
contig000341	vOTU000139	GB_GCA_944390225.1	d__Bacteria;p__Pseudomonadota;c__Alphaproteobacteria;o__Rs-D84;f__Rs-D84;g__Enterousia;s__Enterousia sp944390225	blast	90.9	iPHoP-RF;51.20
contig000341	vOTU000139	GB_GCA_944392815.1	d__Bacteria;p__Pseudomonadota;c__Alphaproteobacteria;o__Rs-D84;f__Rs-D84;g__Enterousia;s__Enterousia sp944392815	blast	90.9	iPHoP-RF;54.90
contig000341	vOTU000139	GB_GCA_944389185.1	d__Bacteria;p__Pseudomonadota;c__Alphaproteobacteria;o__Rs-D84;f__Rs-D84;g__Enterousia;s__Enterousia sp944389185	blast	90.7	iPHoP-RF;78.00
contig000341	vOTU000139	GB_GCA_944389385.1	d__Bacteria;p__Pseudomonadota;c__Alphaproteobacteria;o__Rs-D84;f__Rs-D84;g__Enterousia;s__Enterousia sp944389385	blast	90.6	iPHoP-RF;61.70
contig000341	vOTU000139	GB_GCA_944393245.1	d__Bacteria;p__Pseudomonadota;c__Alphaproteobacteria;o__Rs-D84;f__Rs-D84;g__Enterousia;s__Enterousia sp944393245	blast	90.5	iPHoP-RF;66.50
contig000341	vOTU000139	GB_GCA_944389555.1	d__Bacteria;p__Pseudomonadota;c__Alphaproteobacteria;o__Rs-D84;f__Rs-D84;g__Enterousia;s__Enterousia sp944389555	blast	90.3	iPHoP-RF;79.00
contig000341	vOTU000139	GB_GCA_944389645.1	d__Bacteria;p__Pseudomonadota;c__Alphaproteobacteria;o__Rs-D84;f__Rs-D84;g__Enterousia;s__Enterousia sp944389645	blast	90.2	iPHoP-RF;76.10
contig000341	vOTU000139	GB_GCA_944407095.1	d__Bacteria;p__Pseudomonadota;c__Alphaproteobacteria;o__Rs-D84;f__Rs-D84;g__Enterousia;s__Enterousia intestinigallinarum	blast	90.1	iPHoP-RF;70.20
contig000341	vOTU000139	GB_GCA_944389595.1	d__Bacteria;p__Pseudomonadota;c__Alphaproteobacteria;o__Rs-D84;f__Rs-D84;g__Enterousia;s__Enterousia sp944389595	blast	90	iPHoP-RF;74.30
contig000349	vOTU000144	GB_GCA_019114305.1	d__Bacteria;p__Bacillota_A;c__Clostridia;o__Lachnospirales;f__Lachnospiraceae;g__Hungatella_B;s__Hungatella_B pullicola	blast	93.9	None
contig000349	vOTU000144	RS_GCF_002160135.1	d__Bacteria;p__Bacillota_A;c__Clostridia;o__Lachnospirales;f__Lachnospiraceae;g__Choladocola;s__Choladocola avistercoris	blast	90.8	iPHoP-RF;59.80
contig000366	vOTU000151	GB_GCA_019117485.1	d__Bacteria;p__Bacillota_A;c__Clostridia;o__Oscillospirales;f__Butyricicoccaceae;g__Agathobaculum;s__Agathobaculum intestinipullorum	blast	94.6	None
contig000366	vOTU000151	GB_GCA_019115185.1	d__Bacteria;p__Bacillota_A;c__Clostridia;o__Oscillospirales;f__Butyricicoccaceae;g__Agathobaculum;s__Agathobaculum merdipullorum	blast	93.2	iPHoP-RF;71.70
contig000366	vOTU000151	GB_GCA_019115085.1	d__Bacteria;p__Bacillota_A;c__Clostridia;o__Oscillospirales;f__Butyricicoccaceae;g__Agathobaculum;s__Agathobaculum pullicola	blast	92.3	iPHoP-RF;71.90
contig000366	vOTU000151	RS_GCF_900625105.1	d__Bacteria;p__Bacillota_A;c__Clostridia;o__Oscillospirales;f__Butyricicoccaceae;g__Agathobaculum;s__Agathobaculum sp900625105	blast	91.2	iPHoP-RF;50.20
contig000366	vOTU000151	GB_GCA_944380975.1	d__Bacteria;p__Bacillota_A;c__Clostridia;o__Oscillospirales;f__Butyricicoccaceae;g__Agathobaculum;s__Agathobaculum sp944380975	blast	91.1	iPHoP-RF;90.10
contig000366	vOTU000151	GB_GCA_944384695.1	d__Bacteria;p__Bacillota_A;c__Clostridia;o__Oscillospirales;f__Butyricicoccaceae;g__Agathobaculum;s__Agathobaculum sp944384695	blast	90.4	iPHoP-RF;53.30
contig000366	vOTU000151	GB_GCA_019115615.1	d__Bacteria;p__Bacillota_A;c__Clostridia;o__Oscillospirales;f__Butyricicoccaceae;g__Agathobaculum;s__Agathobaculum merdavium	blast	90.2	None
contig000392	vOTU000154	GB_GCA_944393135.1	d__Bacteria;p__Bacillota_A;c__Clostridia;o__TANB77;f__CAG-508;g__CAG-269;s__CAG-269 sp944393135	blast	90.1	None
contig000404	vOTU000159	RS_GCF_003111605.1	d__Archaea;p__Methanobacteriota;c__Methanobacteria;o__Methanobacteriales;f__Methanobacteriaceae;g__Methanobrevibacter_A;s__Methanobrevibacter_A woesei	blast	92.5	iPHoP-RF;78.70
contig000404	vOTU000159	GB_GCA_900769095.1	d__Archaea;p__Methanobacteriota;c__Methanobacteria;o__Methanobacteriales;f__Methanobacteriaceae;g__Methanobrevibacter_A;s__Methanobrevibacter_A sp900769095	blast	92.4	iPHoP-RF;85.70
contig000404	vOTU000159	RS_GCF_001639275.1	d__Archaea;p__Methanobacteriota;c__Methanobacteria;o__Methanobacteriales;f__Methanobacteriaceae;g__Methanobrevibacter_A;s__Methanobrevibacter_A oralis	iPHoP-RF	91.8	None
contig000404	vOTU000159	RS_GCF_023617305.1	d__Archaea;p__Methanobacteriota;c__Methanobacteria;o__Methanobacteriales;f__Methanobacteriaceae;g__Methanobrevibacter_A;s__Methanobrevibacter_A smithii_A	iPHoP-RF	91.4	None
contig000408	vOTU012759	GB_GCA_900551445.1	d__Bacteria;p__Bacteroidota;c__Bacteroidia;o__Bacteroidales;f__Bacteroidaceae;g__Phocaeicola;s__Phocaeicola sp900551445	CRISPR	99.1	iPHoP-RF;54.40
contig000408	vOTU012759	RS_GCF_000025985.1	d__Bacteria;p__Bacteroidota;c__Bacteroidia;o__Bacteroidales;f__Bacteroidaceae;g__Bacteroides;s__Bacteroides fragilis	CRISPR	99.1	iPHoP-RF;97.10
contig000408	vOTU012759	RS_GCF_900106755.1	d__Bacteria;p__Bacteroidota;c__Bacteroidia;o__Bacteroidales;f__Bacteroidaceae;g__Bacteroides;s__Bacteroides faecis	CRISPR	99.1	iPHoP-RF;97.10
contig000408	vOTU012759	GB_GCA_900544675.1	d__Bacteria;p__Bacteroidota;c__Bacteroidia;o__Bacteroidales;f__Bacteroidaceae;g__Phocaeicola;s__Phocaeicola sp900544675	CRISPR	99	None
contig000408	vOTU012759	GB_GCA_902362595.1	d__Bacteria;p__Bacteroidota;c__Bacteroidia;o__Bacteroidales;f__Bacteroidaceae;g__Phocaeicola;s__Phocaeicola merdigallinarum	CRISPR	99	iPHoP-RF;61.90 blast;55.00
contig000408	vOTU012759	RS_GCF_000187895.1	d__Bacteria;p__Bacteroidota;c__Bacteroidia;o__Bacteroidales;f__Bacteroidaceae;g__Phocaeicola;s__Phocaeicola plebeius	CRISPR	99	iPHoP-RF;97.10 blast;96.20
contig000408	vOTU012759	RS_GCF_003437535.1	d__Bacteria;p__Bacteroidota;c__Bacteroidia;o__Bacteroidales;f__Bacteroidaceae;g__Phocaeicola;s__Phocaeicola plebeius_A	CRISPR	98.9	blast;96.90 iPHoP-RF;96.70
contig000408	vOTU012759	RS_GCF_002161765.1	d__Bacteria;p__Bacteroidota;c__Bacteroidia;o__Bacteroidales;f__Bacteroidaceae;g__Phocaeicola;s__Phocaeicola sp002161765	CRISPR	98.7	None
contig000408	vOTU012759	RS_GCF_013009555.1	d__Bacteria;p__Bacteroidota;c__Bacteroidia;o__Bacteroidales;f__Bacteroidaceae;g__Phocaeicola;s__Phocaeicola dorei	CRISPR	98.4	iPHoP-RF;60.60
contig000408	vOTU012759	GB_GCA_025147485.1	d__Bacteria;p__Bacteroidota;c__Bacteroidia;o__Bacteroidales;f__Bacteroidaceae;g__Bacteroides;s__Bacteroides uniformis	CRISPR	98.3	None
contig000408	vOTU012759	RS_GCF_000157915.1	d__Bacteria;p__Bacteroidota;c__Bacteroidia;o__Bacteroidales;f__Bacteroidaceae;g__Phocaeicola;s__Phocaeicola coprophilus	CRISPR	98.3	blast;78.10 iPHoP-RF;59.80
contig000408	vOTU012759	RS_GCF_000154845.1	d__Bacteria;p__Bacteroidota;c__Bacteroidia;o__Bacteroidales;f__Bacteroidaceae;g__Phocaeicola;s__Phocaeicola coprocola	CRISPR	97.6	blast;78.40 iPHoP-RF;54.10
contig000408	vOTU012759	GB_GCA_905215555.1	d__Bacteria;p__Bacteroidota;c__Bacteroidia;o__Bacteroidales;f__Bacteroidaceae;g__Bacteroides;s__Bacteroides sp905215555	iPHoP-RF	97.1	None
contig000408	vOTU012759	RS_GCF_000210075.1	d__Bacteria;p__Bacteroidota;c__Bacteroidia;o__Bacteroidales;f__Bacteroidaceae;g__Bacteroides;s__Bacteroides xylanisolvens	iPHoP-RF	97.1	None
contig000408	vOTU012759	RS_GCF_002222615.2	d__Bacteria;p__Bacteroidota;c__Bacteroidia;o__Bacteroidales;f__Bacteroidaceae;g__Bacteroides;s__Bacteroides caccae	iPHoP-RF	97.1	None
contig000408	vOTU012759	RS_GCF_900142015.1	d__Bacteria;p__Bacteroidota;c__Bacteroidia;o__Bacteroidales;f__Bacteroidaceae;g__Bacteroides;s__Bacteroides stercorirosoris	iPHoP-RF	97.1	None
contig000408	vOTU012759	GB_GCA_902362375.1	d__Bacteria;p__Bacteroidota;c__Bacteroidia;o__Bacteroidales;f__Bacteroidaceae;g__Bacteroides;s__Bacteroides sp902362375	iPHoP-RF	96.1	None
contig000408	vOTU012759	MGYG000004003	d__Bacteria;p__Bacteroidota;c__Bacteroidia;o__Bacteroidales;f__Bacteroidaceae;g__Bacteroides;s__	iPHoP-RF	96.1	None
contig000408	vOTU012759	RS_GCF_024623065.1	d__Bacteria;p__Bacteroidota;c__Bacteroidia;o__Bacteroidales;f__Bacteroidaceae;g__Bacteroides;s__Bacteroides acidifaciens	iPHoP-RF	96.1	None
contig000408	vOTU012759	RS_GCF_903181435.1	d__Bacteria;p__Bacteroidota;c__Bacteroidia;o__Bacteroidales;f__Bacteroidaceae;g__Bacteroides;s__Bacteroides sp900765785	iPHoP-RF	96.1	None
contig000408	vOTU012759	RS_GCF_000315485.1	d__Bacteria;p__Bacteroidota;c__Bacteroidia;o__Bacteroidales;f__Bacteroidaceae;g__Bacteroides;s__Bacteroides oleiciplenus	iPHoP-RF	95.4	None
contig000408	vOTU012759	RS_GCF_001688725.2	d__Bacteria;p__Bacteroidota;c__Bacteroidia;o__Bacteroidales;f__Bacteroidaceae;g__Bacteroides;s__Bacteroides caecimuris	iPHoP-RF	95.4	None
contig000408	vOTU012759	GB_GCA_905207245.1	d__Bacteria;p__Bacteroidota;c__Bacteroidia;o__Bacteroidales;f__Bacteroidaceae;g__Bacteroides;s__Bacteroides sp905207245	iPHoP-RF	95.1	None
contig000408	vOTU012759	MGYG000075951	d__Bacteria;p__Bacteroidota;c__Bacteroidia;o__Bacteroidales;f__Bacteroidaceae;g__Bacteroides;s__	iPHoP-RF	95.1	None
contig000408	vOTU012759	RS_GCF_009193325.2	d__Bacteria;p__Bacteroidota;c__Bacteroidia;o__Bacteroidales;f__Bacteroidaceae;g__Bacteroides;s__Bacteroides zhangwenhongii	iPHoP-RF	95.1	None
contig000408	vOTU012759	RS_GCF_000011065.1	d__Bacteria;p__Bacteroidota;c__Bacteroidia;o__Bacteroidales;f__Bacteroidaceae;g__Bacteroides;s__Bacteroides thetaiotaomicron	iPHoP-RF	94.7	None
contig000408	vOTU012759	RS_GCF_000156195.1	d__Bacteria;p__Bacteroidota;c__Bacteroidia;o__Bacteroidales;f__Bacteroidaceae;g__Bacteroides;s__Bacteroides finegoldii	iPHoP-RF	90.1	None
contig000434	vOTU000335	GB_GCA_019116585.1	d__Bacteria;p__Bacillota_A;c__Clostridia;o__Oscillospirales;f__Ruminococcaceae;g__Faecalibacterium;s__Faecalibacterium gallistercoris	blast	93.7	CRISPR;89.20 iPHoP-RF;85.10
contig000434	vOTU000335	GB_GCA_019119685.1	d__Bacteria;p__Bacillota_A;c__Clostridia;o__Oscillospirales;f__Ruminococcaceae;g__Faecalibacterium;s__Faecalibacterium faecigallinarum	blast	91.2	iPHoP-RF;71.50
contig000451	vOTU064886	GB_GCA_018304545.1	d__Archaea;p__Aenigmatarchaeota;c__Aenigmatarchaeia;o__CG10238-14;f__CG10238-14;g__JAGVVZ01;s__JAGVVZ01 sp018304545	iPHoP-RF	93.4	None
contig000451	vOTU064886	GB_GCA_003650545.1	d__Archaea;p__Nanoarchaeota;c__Nanoarchaeia;o__Woesearchaeales;f__B72-G16;g__B72-G16;s__B72-G16 sp003650545	iPHoP-RF	92.4	None
contig000454	vOTU000169	GB_GCA_944380855.1	d__Bacteria;p__Bacillota_A;c__Clostridia;o__Oscillospirales;f__Acutalibacteraceae;g__Limousia;s__Limousia sp944380855	blast	91.5	iPHoP-RF;69.30
contig000458	vOTU000170	GB_GCA_019116805.1	d__Bacteria;p__Bacteroidota;c__Bacteroidia;o__Bacteroidales;f__Bacteroidaceae;g__Mediterranea;s__Mediterranea merdavium	iPHoP-RF	94.7	blast;85.50
contig000458	vOTU000170	GB_GCA_025147485.1	d__Bacteria;p__Bacteroidota;c__Bacteroidia;o__Bacteroidales;f__Bacteroidaceae;g__Bacteroides;s__Bacteroides uniformis	iPHoP-RF	93.1	None
contig000458	vOTU000170	GB_GCA_905207245.1	d__Bacteria;p__Bacteroidota;c__Bacteroidia;o__Bacteroidales;f__Bacteroidaceae;g__Bacteroides;s__Bacteroides sp905207245	iPHoP-RF	93.1	None
contig000458	vOTU000170	GB_GCA_905197435.1	d__Bacteria;p__Bacteroidota;c__Bacteroidia;o__Bacteroidales;f__Bacteroidaceae;g__Bacteroides;s__Bacteroides sp905197435	iPHoP-RF	92.4	None
contig000458	vOTU000170	GB_GCA_905215555.1	d__Bacteria;p__Bacteroidota;c__Bacteroidia;o__Bacteroidales;f__Bacteroidaceae;g__Bacteroides;s__Bacteroides sp905215555	iPHoP-RF	92.4	None
contig000458	vOTU000170	RS_GCF_002998435.1	d__Bacteria;p__Bacteroidota;c__Bacteroidia;o__Bacteroidales;f__Bacteroidaceae;g__Bacteroides;s__Bacteroides zoogleoformans	iPHoP-RF	92.4	None
contig000458	vOTU000170	RS_GCF_900142015.1	d__Bacteria;p__Bacteroidota;c__Bacteroidia;o__Bacteroidales;f__Bacteroidaceae;g__Bacteroides;s__Bacteroides stercorirosoris	iPHoP-RF	92.4	None
contig000458	vOTU000170	MGYG000075951	d__Bacteria;p__Bacteroidota;c__Bacteroidia;o__Bacteroidales;f__Bacteroidaceae;g__Bacteroides;s__	iPHoP-RF	92.1	None
contig000458	vOTU000170	RS_GCF_000513195.1	d__Bacteria;p__Bacteroidota;c__Bacteroidia;o__Bacteroidales;f__Bacteroidaceae;g__Bacteroides;s__Bacteroides timonensis	iPHoP-RF	91.8	None
contig000458	vOTU000170	RS_GCF_000614125.1	d__Bacteria;p__Bacteroidota;c__Bacteroidia;o__Bacteroidales;f__Bacteroidaceae;g__Bacteroides;s__Bacteroides rodentium	iPHoP-RF	91.8	None
contig000458	vOTU000170	GB_GCA_910585845.1	d__Bacteria;p__Bacteroidota;c__Bacteroidia;o__Bacteroidales;f__Bacteroidaceae;g__Bacteroides;s__Bacteroides sp910585845	iPHoP-RF	91.4	None
contig000458	vOTU000170	MGYG000172350	d__Bacteria;p__Bacteroidota;c__Bacteroidia;o__Bacteroidales;f__Bacteroidaceae;g__Mediterranea;s__	iPHoP-RF	91.4	None
contig000458	vOTU000170	RS_GCF_900128475.1	d__Bacteria;p__Bacteroidota;c__Bacteroidia;o__Bacteroidales;f__Bacteroidaceae;g__Mediterranea;s__Mediterranea massiliensis	blast	91.2	iPHoP-RF;77.30
contig000458	vOTU000170	MGYG000165276	d__Bacteria;p__Bacteroidota;c__Bacteroidia;o__Bacteroidales;f__Bacteroidaceae;g__Bacteroides;s__	iPHoP-RF	91.1	None
contig000458	vOTU000170	RS_GCF_019239235.1	d__Bacteria;p__Bacteroidota;c__Bacteroidia;o__Bacteroidales;f__Bacteroidaceae;g__Mediterranea;s__Mediterranea pullorum	iPHoP-RF	91.1	None
contig000458	vOTU000170	GB_GCA_000436795.1	d__Bacteria;p__Bacteroidota;c__Bacteroidia;o__Bacteroidales;f__Bacteroidaceae;g__Phocaeicola;s__Phocaeicola sp000436795	blast	90.9	None
contig000458	vOTU000170	MGYG000171082	d__Bacteria;p__Bacteroidota;c__Bacteroidia;o__Bacteroidales;f__Bacteroidaceae;g__Mediterranea;s__	iPHoP-RF	90.5	None
contig000458	vOTU000170	RS_GCF_000025985.1	d__Bacteria;p__Bacteroidota;c__Bacteroidia;o__Bacteroidales;f__Bacteroidaceae;g__Bacteroides;s__Bacteroides fragilis	blast	90.3	iPHoP-RF;86.30
contig000458	vOTU000170	GB_GCA_002293435.1	d__Bacteria;p__Bacteroidota;c__Bacteroidia;o__Bacteroidales;f__Bacteroidaceae;g__Bacteroides;s__Bacteroides sp002293435	iPHoP-RF	90.1	None
contig000458	vOTU000170	RS_GCF_004342845.1	d__Bacteria;p__Bacteroidota;c__Bacteroidia;o__Bacteroidales;f__Bacteroidaceae;g__Bacteroides;s__Bacteroides heparinolyticus	iPHoP-RF	90.1	None
contig000474	vOTU000176	GB_GCA_944393615.1	d__Bacteria;p__Bacillota_A;c__Clostridia;o__TANB77;f__SIG350;g__SIG350;s__SIG350 sp944393615	blast	93.1	None
contig000474	vOTU000176	GB_GCA_900753245.1	d__Bacteria;p__Bacillota_A;c__Clostridia;o__TANB77;f__CAG-508;g__UMGS1663;s__UMGS1663 sp900753245	blast	90.3	None
contig000513	vOTU000184	GB_GCA_900112995.1	d__Bacteria;p__Bacillota_A;c__Clostridia;o__Lachnospirales;f__Lachnospiraceae;g__Lachnospira;s__Lachnospira rogosae	blast	95.7	iPHoP-RF;66.30
contig000514	vOTU000185	GB_GCA_944385795.1	d__Bacteria;p__Bacillota_A;c__Clostridia;o__Oscillospirales;f__Oscillospiraceae;g__Scatomorpha;s__Scatomorpha sp944385795	iPHoP-RF	97.1	None
contig000514	vOTU000185	GB_GCA_900545405.1	d__Bacteria;p__Bacillota_A;c__Clostridia;o__Oscillospirales;f__Oscillospiraceae;g__Scatomorpha;s__Scatomorpha sp900545405	blast	96.8	iPHoP-RF;95.10
contig000514	vOTU000185	GB_GCA_900544295.1	d__Bacteria;p__Bacillota_A;c__Clostridia;o__Oscillospirales;f__Oscillospiraceae;g__Scatomorpha;s__Scatomorpha intestinigallinarum	blast	96.6	CRISPR;89.50 iPHoP-RF;83.30
contig000514	vOTU000185	GB_GCA_004553625.1	d__Bacteria;p__Bacillota_A;c__Clostridia;o__Oscillospirales;f__Oscillospiraceae;g__Scatomorpha;s__Scatomorpha merdavium	CRISPR	93.3	blast;77.30 iPHoP-RF;50.70
contig000514	vOTU000185	GB_GCA_944385815.1	d__Bacteria;p__Bacillota_A;c__Clostridia;o__Oscillospirales;f__Oscillospiraceae;g__Scatomorpha;s__Scatomorpha sp944385815	iPHoP-RF	92.1	None
contig000519	vOTU000187	GB_GCA_944324825.1	d__Bacteria;p__Cyanobacteriota;c__Vampirovibrionia;o__Gastranaerophilales;f__Gastranaerophilaceae;g__UMGS1585;s__UMGS1585 sp944324825	blast	93.5	iPHoP-RF;50.20
contig000519	vOTU000187	GB_GCA_900548405.1	d__Bacteria;p__Cyanobacteriota;c__Vampirovibrionia;o__Gastranaerophilales;f__Gastranaerophilaceae;g__Stercorousia;s__Stercorousia sp001917115	iPHoP-RF	90.8	None
contig000521	vOTU000188	GB_GCA_944383165.1	d__Bacteria;p__Bacillota_A;c__Clostridia;o__Oscillospirales;f__Oscillospiraceae;g__Lawsonibacter;s__Lawsonibacter sp944383165	blast	93.4	iPHoP-RF;67.50
contig000521	vOTU000188	GB_GCA_944387755.1	d__Bacteria;p__Bacillota_A;c__Clostridia;o__Oscillospirales;f__Oscillospiraceae;g__Lawsonibacter;s__Lawsonibacter sp944387755	blast	92.9	iPHoP-RF;72.40
contig000521	vOTU000188	GB_GCA_900760695.1	d__Bacteria;p__Bacillota_A;c__Clostridia;o__Oscillospirales;f__QAKW01;g__HGM12957;s__HGM12957 sp900760695	blast	92	None
contig000531	vOTU000190	GB_GCA_902362595.1	d__Bacteria;p__Bacteroidota;c__Bacteroidia;o__Bacteroidales;f__Bacteroidaceae;g__Phocaeicola;s__Phocaeicola merdigallinarum	CRISPR	98.9	None
contig000531	vOTU000190	RS_GCF_003437535.1	d__Bacteria;p__Bacteroidota;c__Bacteroidia;o__Bacteroidales;f__Bacteroidaceae;g__Phocaeicola;s__Phocaeicola plebeius_A	CRISPR	98.4	iPHoP-RF;50.70
contig000531	vOTU000190	RS_GCF_000382445.1	d__Bacteria;p__Bacteroidota;c__Bacteroidia;o__Bacteroidales;f__Bacteroidaceae;g__Phocaeicola;s__Phocaeicola massiliensis	CRISPR	97.4	None
contig000531	vOTU000190	RS_GCF_000158035.1	d__Bacteria;p__Bacteroidota;c__Bacteroidia;o__Bacteroidales;f__Bacteroidaceae;g__Bacteroides;s__Bacteroides cellulosilyticus	CRISPR	95.8	None
contig000539	vOTU000192	GB_GCA_900551445.1	d__Bacteria;p__Bacteroidota;c__Bacteroidia;o__Bacteroidales;f__Bacteroidaceae;g__Phocaeicola;s__Phocaeicola sp900551445	CRISPR	98.9	iPHoP-RF;94.70
contig000539	vOTU000192	RS_GCF_000187895.1	d__Bacteria;p__Bacteroidota;c__Bacteroidia;o__Bacteroidales;f__Bacteroidaceae;g__Phocaeicola;s__Phocaeicola plebeius	CRISPR	98.9	blast;96.30 iPHoP-RF;92.10
contig000539	vOTU000192	RS_GCF_003437535.1	d__Bacteria;p__Bacteroidota;c__Bacteroidia;o__Bacteroidales;f__Bacteroidaceae;g__Phocaeicola;s__Phocaeicola plebeius_A	CRISPR	98.7	blast;96.70 iPHoP-RF;86.30
contig000539	vOTU000192	RS_GCF_000025985.1	d__Bacteria;p__Bacteroidota;c__Bacteroidia;o__Bacteroidales;f__Bacteroidaceae;g__Bacteroides;s__Bacteroides fragilis	CRISPR	98.2	iPHoP-RF;94.70
contig000539	vOTU000192	RS_GCF_000154845.1	d__Bacteria;p__Bacteroidota;c__Bacteroidia;o__Bacteroidales;f__Bacteroidaceae;g__Phocaeicola;s__Phocaeicola coprocola	CRISPR	98.1	blast;96.70 iPHoP-RF;78.30
contig000539	vOTU000192	GB_GCA_000432735.1	d__Bacteria;p__Bacteroidota;c__Bacteroidia;o__Bacteroidales;f__Bacteroidaceae;g__Phocaeicola;s__Phocaeicola sp000432735	CRISPR	97.9	blast;90.60 iPHoP-RF;73.20
contig000539	vOTU000192	RS_GCF_000374585.1	d__Bacteria;p__Bacteroidota;c__Bacteroidia;o__Bacteroidales;f__Bacteroidaceae;g__Phocaeicola;s__Phocaeicola barnesiae	CRISPR	97.2	iPHoP-RF;64.00
contig000539	vOTU000192	RS_GCF_000157915.1	d__Bacteria;p__Bacteroidota;c__Bacteroidia;o__Bacteroidales;f__Bacteroidaceae;g__Phocaeicola;s__Phocaeicola coprophilus	blast	96.8	iPHoP-RF;87.60
contig000539	vOTU000192	RS_GCF_002222615.2	d__Bacteria;p__Bacteroidota;c__Bacteroidia;o__Bacteroidales;f__Bacteroidaceae;g__Bacteroides;s__Bacteroides caccae	CRISPR	94.6	iPHoP-RF;80.80
contig000539	vOTU000192	GB_GCA_900552075.1	d__Bacteria;p__Bacteroidota;c__Bacteroidia;o__Bacteroidales;f__Bacteroidaceae;g__Phocaeicola;s__Phocaeicola sp900552075	iPHoP-RF	91.8	None
contig000539	vOTU000192	GB_GCA_000436795.1	d__Bacteria;p__Bacteroidota;c__Bacteroidia;o__Bacteroidales;f__Bacteroidaceae;g__Phocaeicola;s__Phocaeicola sp000436795	iPHoP-RF	91.4	blast;89.80
contig000539	vOTU000192	GB_GCA_944320885.1	d__Bacteria;p__Bacteroidota;c__Bacteroidia;o__Bacteroidales;f__Bacteroidaceae;g__Phocaeicola_A;s__Phocaeicola_A sp944320885	iPHoP-RF	91.4	None
contig000539	vOTU000192	RS_GCF_900142015.1	d__Bacteria;p__Bacteroidota;c__Bacteroidia;o__Bacteroidales;f__Bacteroidaceae;g__Bacteroides;s__Bacteroides stercorirosoris	iPHoP-RF	90.8	None
contig000540	vOTU000193	GB_GCA_022846075.1	d__Bacteria;p__Bacillota_A;c__Clostridia;o__Oscillospirales;f__Oscillospiraceae;g__Marseille-P3106;s__Marseille-P3106 sp900543935	blast	93.1	None
contig000562	vOTU084799	GB_GCA_018714845.1	d__Bacteria;p__Bacillota_A;c__Clostridia;o__Oscillospirales;f__Butyricicoccaceae;g__Ventrousia;s__Ventrousia excrementavium	blast	92.4	iPHoP-RF;52.80
contig000562	vOTU084799	GB_GCA_902363045.1	d__Bacteria;p__Bacillota_A;c__Clostridia;o__Oscillospirales;f__Oscillospiraceae;g__Lawsonibacter;s__Lawsonibacter sp902363045	blast	92.3	iPHoP-RF;60.10
contig000562	vOTU084799	GB_GCA_902362775.1	d__Bacteria;p__Bacillota_A;c__Clostridia;o__Oscillospirales;f__Oscillospiraceae;g__Lawsonibacter;s__Lawsonibacter sp900066645	blast	91.8	iPHoP-RF;58.70
contig000564	vOTU000196	RS_GCF_000153925.1	d__Bacteria;p__Bacillota_A;c__Clostridia;o__Lachnospirales;f__Lachnospiraceae;g__Mediterraneibacter;s__Mediterraneibacter torques	blast	93.6	iPHoP-RF;66.50
contig000573	vOTU000199	RS_GCF_005121165.3	d__Bacteria;p__Bacillota_A;c__Clostridia;o__Oscillospirales;f__Oscillospiraceae;g__Dysosmobacter;s__Dysosmobacter welbionis	blast	93.3	iPHoP-RF;80.80
contig000573	vOTU000199	GB_GCA_900756495.1	d__Bacteria;p__Bacillota_A;c__Clostridia;o__Oscillospirales;f__Oscillospiraceae;g__HGM12998;s__HGM12998 sp900756495	blast	90.9	iPHoP-RF;64.00
contig000585	vOTU000739	RS_GCF_002379365.1	d__Bacteria;p__Spirochaetota;c__Brachyspirae;o__Brachyspirales;f__Brachyspiraceae;g__Brachyspira;s__Brachyspira sp002379365	CRISPR	99.1	None
contig000585	vOTU000739	RS_GCF_000092845.1	d__Bacteria;p__Spirochaetota;c__Brachyspirae;o__Brachyspirales;f__Brachyspiraceae;g__Brachyspira;s__Brachyspira murdochii	CRISPR	99	None
contig000620	vOTU000207	GB_GCA_003481005.1	d__Bacteria;p__Bacillota_A;c__Clostridia;o__Lachnospirales;f__Lachnospiraceae;g__Eisenbergiella;s__Eisenbergiella sp900066775	blast	94.2	iPHoP-RF;71.70
contig000624	vOTU000208	GB_GCA_018712075.1	d__Bacteria;p__Bacillota_A;c__Clostridia;o__Lachnospirales;f__Lachnospiraceae;g__Fimimorpha;s__Fimimorpha faecalis	blast	95.8	iPHoP-RF;71.50 CRISPR;67.70
contig000630	vOTU000211	GB_GCA_018712905.1	d__Bacteria;p__Bacillota_A;c__Clostridia;o__Oscillospirales;f__Oscillospiraceae;g__Avoscillospira;s__Avoscillospira stercoripullorum	blast	93.3	iPHoP-RF;57.60
contig000650	vOTU000219	RS_GCF_016899775.1	d__Bacteria;p__Bacillota_A;c__Clostridia;o__Oscillospirales;f__Oscillospiraceae;g__Lawsonibacter;s__Lawsonibacter sp900545895	blast	93.5	iPHoP-RF;58.20
contig000661	vOTU000223	GB_GCA_018714695.1	d__Bacteria;p__Bacillota_A;c__Clostridia;o__UBA1381;f__UBA1381;g__Ornithomonoglobus;s__Ornithomonoglobus merdipullorum	blast	91.8	iPHoP-RF;64.50
contig000661	vOTU000223	GB_GCA_905215805.1	d__Bacteria;p__Bacillota_A;c__Clostridia;o__UBA1381;f__UBA1381;g__UBA4716;s__UBA4716 sp905215805	blast	91.8	iPHoP-RF;72.60
contig000661	vOTU000223	GB_GCA_944391255.1	d__Bacteria;p__Bacillota_A;c__Clostridia;o__UBA1381;f__UBA1381;g__Ornithomonoglobus;s__Ornithomonoglobus sp944391255	blast	90.1	iPHoP-RF;79.00
contig000662	vOTU000224	GB_GCA_944343275.1	d__Bacteria;p__Bacillota_A;c__Clostridia;o__Christensenellales;f__Borkfalkiaceae;g__Gallimonas;s__Gallimonas sp944343275	blast	94.5	None
contig000667	vOTU000226	GB_GCA_900548355.1	d__Bacteria;p__Bacillota_A;c__Clostridia;o__Oscillospirales;f__Ruminococcaceae;g__Gemmiger;s__Gemmiger avicola	blast	92.6	iPHoP-RF;79.80 CRISPR;58.80
contig000667	vOTU000226	RS_GCF_016901605.1	d__Bacteria;p__Bacillota_A;c__Clostridia;o__Oscillospirales;f__Ruminococcaceae;g__Gemmiger;s__Gemmiger formicilis_B	blast	90.9	iPHoP-RF;76.10
contig000671	vOTU000227	RS_GCF_012843875.1	d__Bacteria;p__Desulfobacterota;c__Desulfovibrionia;o__Desulfovibrionales;f__Desulfovibrionaceae;g__Desulfovibrio;s__Desulfovibrio sp900556755	blast	96.7	iPHoP-RF;68.60
contig000671	vOTU000227	RS_GCF_900116045.1	d__Bacteria;p__Desulfobacterota;c__Desulfovibrionia;o__Desulfovibrionales;f__Desulfovibrionaceae;g__Desulfovibrio;s__Desulfovibrio piger_A	blast	96.1	iPHoP-RF;84.50
contig000671	vOTU000227	MGYG000002687	d__Bacteria;p__Desulfobacterota;c__Desulfovibrionia;o__Desulfovibrionales;f__Desulfovibrionaceae;g__Desulfovibrio;s__	blast	95.5	iPHoP-RF;79.30
contig000671	vOTU000227	RS_GCF_000156375.1	d__Bacteria;p__Desulfobacterota;c__Desulfovibrionia;o__Desulfovibrionales;f__Desulfovibrionaceae;g__Desulfovibrio;s__Desulfovibrio piger	blast	95.2	iPHoP-RF;80.80
contig000671	vOTU000227	MGYG000269208	d__Bacteria;p__Desulfobacterota;c__Desulfovibrionia;o__Desulfovibrionales;f__Desulfovibrionaceae;g__Desulfovibrio;s__	blast	94.8	iPHoP-RF;86.00
contig000671	vOTU000227	GB_GCA_000403945.1	d__Bacteria;p__Desulfobacterota;c__Desulfovibrionia;o__Desulfovibrionales;f__Desulfovibrionaceae;g__Desulfovibrio;s__Desulfovibrio sp000403945	blast	91	iPHoP-RF;74.10
contig000671	vOTU000227	GB_GCA_910575755.1	d__Bacteria;p__Desulfobacterota;c__Desulfovibrionia;o__Desulfovibrionales;f__Desulfovibrionaceae;g__Desulfovibrio;s__Desulfovibrio sp910575755	blast	90.7	iPHoP-RF;86.30
contig000672	vOTU000228	GB_GCA_944390275.1	d__Bacteria;p__Pseudomonadota;c__Alphaproteobacteria;o__RF32;f__CAG-239;g__HGM16780;s__HGM16780 sp944390275	CRISPR	98.9	None
contig000672	vOTU000228	GB_GCA_944391345.1	d__Bacteria;p__Pseudomonadota;c__Alphaproteobacteria;o__RF32;f__CAG-239;g__HGM16780;s__HGM16780 sp944391345	CRISPR	98.9	None
contig000672	vOTU000228	GB_GCA_944391365.1	d__Bacteria;p__Pseudomonadota;c__Alphaproteobacteria;o__RF32;f__CAG-239;g__HGM16780;s__HGM16780 sp944391365	CRISPR	98.9	None
contig000672	vOTU000228	GB_GCA_944390355.1	d__Bacteria;p__Pseudomonadota;c__Alphaproteobacteria;o__RF32;f__CAG-239;g__HGM16780;s__HGM16780 sp944390355	CRISPR	98.8	iPHoP-RF;66.50
contig000672	vOTU000228	GB_GCA_900538765.1	d__Bacteria;p__Pseudomonadota;c__Alphaproteobacteria;o__RF32;f__CAG-239;g__HGM16780;s__HGM16780 sp900538765	CRISPR	98.7	iPHoP-RF;65.60
contig000672	vOTU000228	GB_GCA_001917125.1	d__Bacteria;p__Pseudomonadota;c__Alphaproteobacteria;o__RF32;f__CAG-239;g__Scatocola;s__Scatocola faecipullorum	CRISPR	98.4	iPHoP-RF;71.50
contig000672	vOTU000228	GB_GCA_944393205.1	d__Bacteria;p__Pseudomonadota;c__Alphaproteobacteria;o__RF32;f__CAG-239;g__CAAFZY01;s__CAAFZY01 sp944393205	blast	91.3	iPHoP-RF;59.00
contig000672	vOTU000228	GB_GCA_944392155.1	d__Bacteria;p__Pseudomonadota;c__Alphaproteobacteria;o__RF32;f__CAG-239;g__Scatacola_A;s__Scatacola_A sp944392155	CRISPR	91	None
contig000674	vOTU000229	GB_GCA_000435195.1	d__Bacteria;p__Bacillota_A;c__Clostridia;o__Oscillospirales;f__Ruminococcaceae;g__Negativibacillus;s__Negativibacillus sp000435195	blast	91.9	None
contig000687	vOTU000232	GB_GCA_944385655.1	d__Bacteria;p__Bacillota_A;c__Clostridia;o__Oscillospirales;f__Oscillospiraceae;g__Intestinimonas;s__Intestinimonas sp944385655	blast	93.1	None
contig000692	vOTU000234	GB_GCA_019116185.1	d__Bacteria;p__Bacillota_A;c__Clostridia;o__Lachnospirales;f__Lachnospiraceae;g__Mediterraneibacter;s__Mediterraneibacter stercorigallinarum	CRISPR	98.2	iPHoP-RF;79.00
contig000692	vOTU000234	GB_GCA_900761655.1	d__Bacteria;p__Bacillota_A;c__Clostridia;o__Lachnospirales;f__Lachnospiraceae;g__Mediterraneibacter;s__Mediterraneibacter sp900761655	CRISPR	98.1	iPHoP-RF;76.40
contig000692	vOTU000234	RS_GCF_002161355.1	d__Bacteria;p__Bacillota_A;c__Clostridia;o__Lachnospirales;f__Lachnospiraceae;g__Mediterraneibacter;s__Mediterraneibacter caccavium	CRISPR	97.8	iPHoP-RF;79.50
contig000692	vOTU000234	GB_GCA_019117065.1	d__Bacteria;p__Bacillota_A;c__Clostridia;o__Lachnospirales;f__Lachnospiraceae;g__Mediterraneibacter;s__Mediterraneibacter pullicola	CRISPR	97.4	blast;95.00 iPHoP-RF;77.10
contig000692	vOTU000234	GB_GCA_904418845.1	d__Bacteria;p__Bacillota_A;c__Clostridia;o__Lachnospirales;f__Lachnospiraceae;g__Mediterraneibacter;s__Mediterraneibacter sp904418845	blast	96.1	iPHoP-RF;79.00
contig000692	vOTU000234	GB_GCA_019418195.1	d__Bacteria;p__Bacillota_A;c__Clostridia;o__Lachnospirales;f__Lachnospiraceae;g__Mediterraneibacter;s__Mediterraneibacter sp019418195	CRISPR	96	iPHoP-RF;73.20
contig000692	vOTU000234	GB_GCA_019119745.1	d__Bacteria;p__Bacillota_A;c__Clostridia;o__Lachnospirales;f__Lachnospiraceae;g__Mediterraneibacter;s__Mediterraneibacter gallistercoris	CRISPR	95.6	iPHoP-RF;80.60
contig000692	vOTU000234	GB_GCA_930986645.1	d__Bacteria;p__Bacillota_A;c__Clostridia;o__Lachnospirales;f__Lachnospiraceae;g__Mediterraneibacter;s__Mediterraneibacter sp930986645	blast	95.5	iPHoP-RF;81.40
contig000692	vOTU000234	GB_GCA_019118665.1	d__Bacteria;p__Bacillota_A;c__Clostridia;o__Lachnospirales;f__Lachnospiraceae;g__Mediterraneibacter;s__Mediterraneibacter intestinipullorum	blast	94.6	iPHoP-RF;75.70
contig000692	vOTU000234	GB_GCA_900751785.1	d__Bacteria;p__Bacillota_A;c__Clostridia;o__Lachnospirales;f__Lachnospiraceae;g__Mediterraneibacter;s__Mediterraneibacter faecigallinarum	CRISPR	94.6	iPHoP-RF;77.30
contig000692	vOTU000234	GB_GCA_944375765.1	d__Bacteria;p__Bacillota_A;c__Clostridia;o__Lachnospirales;f__Lachnospiraceae;g__Mediterraneibacter;s__Mediterraneibacter sp944375765	blast	93.3	iPHoP-RF;69.80
contig000692	vOTU000234	GB_GCA_019120595.1	d__Bacteria;p__Bacillota_A;c__Clostridia;o__Lachnospirales;f__Lachnospiraceae;g__Mediterraneibacter;s__Mediterraneibacter tabaqchaliae	CRISPR	92.3	iPHoP-RF;73.50
contig000693	vOTU000235	RS_GCF_022809355.1	d__Bacteria;p__Bacteroidota;c__Bacteroidia;o__Bacteroidales;f__Tannerellaceae;g__Parabacteroides;s__Parabacteroides faecavium	blast	98.2	iPHoP-RF;93.10
contig000693	vOTU000235	GB_GCA_944323815.1	d__Bacteria;p__Bacteroidota;c__Bacteroidia;o__Bacteroidales;f__Tannerellaceae;g__Parabacteroides;s__Parabacteroides sp944323815	iPHoP-RF	92.8	None
contig000693	vOTU000235	RS_GCF_011038785.1	d__Bacteria;p__Bacteroidota;c__Bacteroidia;o__Bacteroidales;f__Tannerellaceae;g__Parabacteroides;s__Parabacteroides sp011038785	iPHoP-RF	92.8	None
contig000693	vOTU000235	RS_GCF_004793765.1	d__Bacteria;p__Bacteroidota;c__Bacteroidia;o__Bacteroidales;f__Tannerellaceae;g__Parabacteroides;s__Parabacteroides distasonis_A	iPHoP-RF	92.4	None
contig000693	vOTU000235	MGYG000164138	d__Bacteria;p__Bacteroidota;c__Bacteroidia;o__Bacteroidales;f__Tannerellaceae;g__Parabacteroides;s__	blast	91.8	iPHoP-RF;90.50
contig000693	vOTU000235	RS_GCF_023744375.1	d__Bacteria;p__Bacteroidota;c__Bacteroidia;o__Bacteroidales;f__Tannerellaceae;g__Parabacteroides;s__Parabacteroides sp900548175	iPHoP-RF	91.8	blast;91.80
contig000719	vOTU000244	RS_GCF_002834235.1	d__Bacteria;p__Bacillota_A;c__Clostridia;o__Oscillospirales;f__Acutalibacteraceae;g__Ruminococcus_E;s__Ruminococcus_E bromii_B	blast	93.8	iPHoP-RF;56.50
contig000719	vOTU000244	GB_GCA_002493635.1	d__Bacteria;p__Bacillota_A;c__Clostridia;o__Oscillospirales;f__Acutalibacteraceae;g__Ruminococcus_E;s__Ruminococcus_E sp002493635	blast	91.9	None
contig000719	vOTU000244	GB_GCA_002493005.1	d__Bacteria;p__Bacillota_A;c__Clostridia;o__Oscillospirales;f__Acutalibacteraceae;g__Ruminococcus_E;s__Ruminococcus_E sp002493005	blast	90.9	None
contig000719	vOTU000244	MGYG000302688	d__Bacteria;p__Bacillota_A;c__Clostridia;o__Oscillospirales;f__Acutalibacteraceae;g__Ruminococcus_E;s__	blast	90.2	None
contig000723	vOTU000245	GB_GCA_018712905.1	d__Bacteria;p__Bacillota_A;c__Clostridia;o__Oscillospirales;f__Oscillospiraceae;g__Avoscillospira;s__Avoscillospira stercoripullorum	blast	96.6	iPHoP-RF;82.50
contig000723	vOTU000245	GB_GCA_018712245.1	d__Bacteria;p__Bacillota_A;c__Clostridia;o__Oscillospirales;f__Oscillospiraceae;g__Avoscillospira;s__Avoscillospira avicola	blast	91.1	iPHoP-RF;53.60
contig000729	vOTU000248	GB_GCA_900546615.1	d__Bacteria;p__Bacillota_A;c__Clostridia;o__Oscillospirales;f__Oscillospiraceae;g__Scatomorpha;s__Scatomorpha pullistercoris	CRISPR	98.7	iPHoP-RF;78.70 blast;78.70
contig000729	vOTU000248	GB_GCA_900544295.1	d__Bacteria;p__Bacillota_A;c__Clostridia;o__Oscillospirales;f__Oscillospiraceae;g__Scatomorpha;s__Scatomorpha intestinigallinarum	blast	98.5	CRISPR;97.60 iPHoP-RF;92.80
contig000729	vOTU000248	GB_GCA_004553625.1	d__Bacteria;p__Bacillota_A;c__Clostridia;o__Oscillospirales;f__Oscillospiraceae;g__Scatomorpha;s__Scatomorpha merdavium	CRISPR	98.1	None
contig000729	vOTU000248	GB_GCA_900545405.1	d__Bacteria;p__Bacillota_A;c__Clostridia;o__Oscillospirales;f__Oscillospiraceae;g__Scatomorpha;s__Scatomorpha sp900545405	blast	96.6	iPHoP-RF;82.80
contig000754	vOTU000253	GB_GCA_944323535.1	d__Bacteria;p__Cyanobacteriota;c__Vampirovibrionia;o__Gastranaerophilales;f__Gastranaerophilaceae;g__Avigastranaerophilus;s__Avigastranaerophilus sp944323535	blast	93.6	iPHoP-RF;65.10
contig000754	vOTU000253	GB_GCA_944325525.1	d__Bacteria;p__Cyanobacteriota;c__Vampirovibrionia;o__Gastranaerophilales;f__Gastranaerophilaceae;g__Avigastranaerophilus;s__Avigastranaerophilus sp944325525	blast	93.2	iPHoP-RF;65.10
contig000754	vOTU000253	GB_GCA_944323625.1	d__Bacteria;p__Cyanobacteriota;c__Vampirovibrionia;o__Gastranaerophilales;f__Gastranaerophilaceae;g__Avigastranaerophilus;s__Avigastranaerophilus sp944323625	blast	93.1	iPHoP-RF;52.00
contig000776	vOTU000259	RS_GCF_003436425.1	d__Bacteria;p__Bacillota;c__Bacilli;o__Erysipelotrichales;f__Erysipelotrichaceae;g__Holdemanella;s__Holdemanella sp003436425	blast	96.7	iPHoP-RF;71.30
contig000789	vOTU000262	GB_GCA_019115305.1	d__Bacteria;p__Bacillota_A;c__Clostridia;o__Oscillospirales;f__Ruminococcaceae;g__Anaerofilum;s__Anaerofilum excrementigallinarum	blast	91.8	iPHoP-RF;65.80
contig000789	vOTU000262	RS_GCF_002159185.1	d__Bacteria;p__Bacillota_A;c__Clostridia;o__Oscillospirales;f__Ruminococcaceae;g__Fournierella;s__Fournierella sp002159185	blast	91.3	iPHoP-RF;71.10
contig000806	vOTU062187	RS_GCF_002161285.1	d__Bacteria;p__Bacillota_A;c__Clostridia;o__Lachnospirales;f__Lachnospiraceae;g__Blautia;s__Blautia ornithocaccae	blast	96.8	iPHoP-RF;79.50 CRISPR;67.10
contig000806	vOTU062187	GB_GCA_019118685.1	d__Bacteria;p__Bacillota_A;c__Clostridia;o__Lachnospirales;f__Lachnospiraceae;g__Blautia;s__Blautia merdipullorum	blast	96.7	iPHoP-RF;94.10 CRISPR;90.30
contig000806	vOTU062187	GB_GCA_019120545.1	d__Bacteria;p__Bacillota_A;c__Clostridia;o__Lachnospirales;f__Lachnospiraceae;g__Blautia;s__Blautia stercoripullorum	blast	96.7	iPHoP-RF;92.80
contig000806	vOTU062187	GB_GCA_019114545.1	d__Bacteria;p__Bacillota_A;c__Clostridia;o__Lachnospirales;f__Lachnospiraceae;g__Blautia;s__Blautia pullistercoris	iPHoP-RF	93.4	blast;89.70
contig000806	vOTU062187	GB_GCA_944384185.1	d__Bacteria;p__Bacillota_A;c__Clostridia;o__Lachnospirales;f__Lachnospiraceae;g__Blautia;s__Blautia sp944384185	blast	90.4	iPHoP-RF;89.50
contig000818	vOTU000270	GB_GCA_900542765.1	d__Bacteria;p__Bacteroidota;c__Bacteroidia;o__Bacteroidales;f__UBA11471;g__UBA11471;s__UBA11471 sp900542765	blast	93.4	None
contig000818	vOTU000270	GB_GCA_000434215.1	d__Bacteria;p__Bacteroidota;c__Bacteroidia;o__Bacteroidales;f__UBA11471;g__UBA11471;s__UBA11471 sp000434215	blast	91.9	iPHoP-RF;57.10
contig000818	vOTU000270	RS_GCF_000205165.1	d__Bacteria;p__Bacteroidota;c__Bacteroidia;o__Bacteroidales;f__Bacteroidaceae;g__Paraprevotella;s__Paraprevotella xylaniphila	blast	90.2	None
contig000835	vOTU000273	GB_GCA_019117305.1	d__Bacteria;p__Bacillota_A;c__Clostridia;o__Lachnospirales;f__Lachnospiraceae;g__Mediterraneibacter;s__Mediterraneibacter merdigallinarum	CRISPR	98.6	blast;90.50 iPHoP-RF;85.70
contig000835	vOTU000273	GB_GCA_944377745.1	d__Bacteria;p__Bacillota_A;c__Clostridia;o__Lachnospirales;f__Lachnospiraceae;g__Mediterraneibacter;s__Mediterraneibacter sp944377745	CRISPR	98.5	iPHoP-RF;81.90
contig000835	vOTU000273	GB_GCA_019119745.1	d__Bacteria;p__Bacillota_A;c__Clostridia;o__Lachnospirales;f__Lachnospiraceae;g__Mediterraneibacter;s__Mediterraneibacter gallistercoris	CRISPR	98.4	blast;90.20 iPHoP-RF;82.20
contig000835	vOTU000273	GB_GCA_904419285.1	d__Bacteria;p__Bacillota_A;c__Clostridia;o__Lachnospirales;f__Lachnospiraceae;g__Mediterraneibacter;s__Mediterraneibacter caccogallinarum	CRISPR	98.3	iPHoP-RF;73.20
contig000835	vOTU000273	RS_GCF_002161355.1	d__Bacteria;p__Bacillota_A;c__Clostridia;o__Lachnospirales;f__Lachnospiraceae;g__Mediterraneibacter;s__Mediterraneibacter caccavium	CRISPR	98.3	iPHoP-RF;71.10
contig000835	vOTU000273	GB_GCA_900751785.1	d__Bacteria;p__Bacillota_A;c__Clostridia;o__Lachnospirales;f__Lachnospiraceae;g__Mediterraneibacter;s__Mediterraneibacter faecigallinarum	CRISPR	98	iPHoP-RF;79.30
contig000835	vOTU000273	RS_GCF_000765215.1	d__Bacteria;p__Bacillota_A;c__Clostridia;o__Lachnospirales;f__Lachnospiraceae;g__Lachnoclostridium_B;s__Lachnoclostridium_B sp000765215	CRISPR	93.1	iPHoP-RF;50.70
contig000835	vOTU000273	GB_GCA_019118645.1	d__Bacteria;p__Bacillota_A;c__Clostridia;o__Lachnospirales;f__Lachnospiraceae;g__Blautia_A;s__Blautia_A excrementipullorum	blast	91.7	None
contig000835	vOTU000273	GB_GCA_019120075.1	d__Bacteria;p__Bacillota_A;c__Clostridia;o__Lachnospirales;f__Lachnospiraceae;g__Mediterraneibacter;s__Mediterraneibacter excrementigallinarum	blast	90.5	iPHoP-RF;83.30
contig000835	vOTU000273	GB_GCA_019115385.1	d__Bacteria;p__Bacillota_A;c__Clostridia;o__Lachnospirales;f__Lachnospiraceae;g__Mediterraneibacter;s__Mediterraneibacter avicola	blast	90.1	iPHoP-RF;81.90
contig000835	vOTU000273	RS_GCF_003574295.1	d__Bacteria;p__Bacillota_A;c__Clostridia;o__Lachnospirales;f__Lachnospiraceae;g__Mediterraneibacter_A;s__Mediterraneibacter_A butyricigenes	iPHoP-RF	90.1	None
contig000843	vOTU138937	RS_GCF_000243215.1	d__Bacteria;p__Bacteroidota;c__Bacteroidia;o__Bacteroidales;f__Marinifilaceae;g__Odoribacter;s__Odoribacter laneus	blast	93.2	None
contig000847	vOTU000277	MGYG000003851	d__Bacteria;p__Actinomycetota;c__Coriobacteriia;o__Coriobacteriales;f__Coriobacteriaceae;g__Collinsella;s__	CRISPR	98.9	iPHoP-RF;75.90
contig000847	vOTU000277	RS_GCF_023656745.1	d__Bacteria;p__Actinomycetota;c__Coriobacteriia;o__Coriobacteriales;f__Coriobacteriaceae;g__Collinsella;s__Collinsella sp023656745	CRISPR	98.9	iPHoP-RF;77.80
contig000847	vOTU000277	RS_GCF_900046475.1	d__Bacteria;p__Actinomycetota;c__Coriobacteriia;o__Coriobacteriales;f__Coriobacteriaceae;g__Collinsella;s__Collinsella ihumii	CRISPR	98.9	iPHoP-RF;87.00
contig000847	vOTU000277	GB_GCA_900541055.1	d__Bacteria;p__Actinomycetota;c__Coriobacteriia;o__Coriobacteriales;f__Coriobacteriaceae;g__Collinsella;s__Collinsella sp900541055	CRISPR	98.8	iPHoP-RF;57.60
contig000847	vOTU000277	GB_GCA_900541855.1	d__Bacteria;p__Actinomycetota;c__Coriobacteriia;o__Coriobacteriales;f__Coriobacteriaceae;g__Collinsella;s__Collinsella sp900541855	CRISPR	98.8	iPHoP-RF;57.60
contig000847	vOTU000277	GB_GCA_905215815.1	d__Bacteria;p__Actinomycetota;c__Coriobacteriia;o__Coriobacteriales;f__Coriobacteriaceae;g__Collinsella;s__Collinsella sp905215815	CRISPR	98.8	None
contig000847	vOTU000277	GB_GCA_900764955.1	d__Bacteria;p__Actinomycetota;c__Coriobacteriia;o__Coriobacteriales;f__Coriobacteriaceae;g__Collinsella;s__Collinsella sp900764955	CRISPR	98.7	None
contig000847	vOTU000277	RS_GCF_900155365.1	d__Bacteria;p__Actinomycetota;c__Coriobacteriia;o__Coriobacteriales;f__Coriobacteriaceae;g__Collinsella;s__Collinsella bouchesdurhonensis	CRISPR	98.7	iPHoP-RF;74.10
contig000847	vOTU000277	GB_GCA_900541195.1	d__Bacteria;p__Actinomycetota;c__Coriobacteriia;o__Coriobacteriales;f__Coriobacteriaceae;g__Collinsella;s__Collinsella sp900541195	CRISPR	98.5	None
contig000847	vOTU000277	GB_GCA_900540945.1	d__Bacteria;p__Actinomycetota;c__Coriobacteriia;o__Coriobacteriales;f__Coriobacteriaceae;g__Collinsella;s__Collinsella sp900540945	CRISPR	98.1	None
contig000847	vOTU000277	RS_GCF_000156175.1	d__Bacteria;p__Actinomycetota;c__Coriobacteriia;o__Coriobacteriales;f__Coriobacteriaceae;g__Collinsella;s__Collinsella intestinalis	blast	91.2	None
contig000847	vOTU000277	GB_GCA_019419555.1	d__Bacteria;p__Actinomycetota;c__Coriobacteriia;o__Coriobacteriales;f__Coriobacteriaceae;g__Collinsella;s__Collinsella sp019419555	blast	91	iPHoP-RF;74.60
contig000847	vOTU000277	GB_GCA_905213325.1	d__Bacteria;p__Actinomycetota;c__Coriobacteriia;o__Coriobacteriales;f__Coriobacteriaceae;g__Collinsella;s__Collinsella aerofaciens_AG	blast	91	iPHoP-RF;80.30
contig000847	vOTU000277	GB_GCA_900754275.1	d__Bacteria;p__Actinomycetota;c__Coriobacteriia;o__Coriobacteriales;f__Coriobacteriaceae;g__Collinsella;s__Collinsella sp900754275	blast	90.5	iPHoP-RF;78.30
contig000847	vOTU000277	GB_GCA_905215765.1	d__Bacteria;p__Actinomycetota;c__Coriobacteriia;o__Coriobacteriales;f__Coriobacteriaceae;g__Collinsella;s__Collinsella sp905215765	blast	90.5	iPHoP-RF;79.30
contig000847	vOTU000277	GB_GCA_900541285.1	d__Bacteria;p__Actinomycetota;c__Coriobacteriia;o__Coriobacteriales;f__Coriobacteriaceae;g__Collinsella;s__Collinsella sp900541285	blast	90.2	iPHoP-RF;78.70
contig000847	vOTU000277	RS_GCF_003459245.1	d__Bacteria;p__Actinomycetota;c__Coriobacteriia;o__Coriobacteriales;f__Coriobacteriaceae;g__Collinsella;s__Collinsella sp003459245	blast	90.1	iPHoP-RF;78.30
contig000869	vOTU000283	GB_GCA_900770055.1	d__Bacteria;p__Bacillota;c__Bacilli;o__Acholeplasmatales;f__Anaeroplasmataceae;g__Anaeroplasma;s__Anaeroplasma sp900770055	blast	91.7	None
contig000871	vOTU047812	RS_GCF_000012825.1	d__Bacteria;p__Bacteroidota;c__Bacteroidia;o__Bacteroidales;f__Bacteroidaceae;g__Phocaeicola;s__Phocaeicola vulgatus	blast	91.8	None
contig000886	vOTU000284	GB_GCA_900759995.1	d__Bacteria;p__Bacillota_A;c__Clostridia;o__Clostridiales;f__Clostridiaceae;g__Clostridium;s__Clostridium sp900759995	blast	93.7	iPHoP-RF;75.90
contig000887	vOTU000285	GB_GCA_900768915.1	d__Bacteria;p__Cyanobacteriota;c__Vampirovibrionia;o__Gastranaerophilales;f__Gastranaerophilaceae;g__UBA2883;s__UBA2883 sp900768915	blast	91.3	None
contig000901	vOTU013267	GB_GCA_944349545.1	d__Bacteria;p__Bacillota_A;c__Clostridia;o__Christensenellales;f__CAG-74;g__Limiplasma;s__Limiplasma sp944349545	CRISPR	99	iPHoP-RF;80.60
contig000901	vOTU013267	GB_GCA_900540045.1	d__Bacteria;p__Bacillota_A;c__Clostridia;o__Christensenellales;f__CAG-74;g__Limiplasma;s__Limiplasma merdipullorum	CRISPR	98.9	blast;94.50 iPHoP-RF;73.20
contig000901	vOTU013267	GB_GCA_900553905.1	d__Bacteria;p__Bacillota_A;c__Clostridia;o__Christensenellales;f__CAG-74;g__Limiplasma;s__Limiplasma pullistercoris	CRISPR	98.9	iPHoP-RF;78.70
contig000901	vOTU013267	GB_GCA_023404345.1	d__Bacteria;p__Bacillota_A;c__Clostridia;o__Christensenellales;f__CAG-74;g__Limiplasma;s__Limiplasma sp023404345	blast	93.9	iPHoP-RF;74.80
contig000901	vOTU013267	GB_GCA_018715175.1	d__Bacteria;p__Bacillota_A;c__Clostridia;o__Christensenellales;f__CAG-74;g__Limiplasma;s__Limiplasma stercoravium	blast	91.9	iPHoP-RF;80.30
contig000920	vOTU000296	RS_GCF_003943905.1	d__Bacteria;p__Bacillota;c__Bacilli;o__Lactobacillales;f__Streptococcaceae;g__Streptococcus;s__Streptococcus mitis_BC	CRISPR	99.4	iPHoP-RF;90.80
contig000920	vOTU000296	RS_GCF_019929345.1	d__Bacteria;p__Bacillota;c__Bacilli;o__Lactobacillales;f__Streptococcaceae;g__Streptococcus;s__Streptococcus sp015256435	CRISPR	99.4	iPHoP-RF;91.10
contig000920	vOTU000296	GB_GCA_000283635.1	d__Bacteria;p__Bacillota;c__Bacilli;o__Lactobacillales;f__Streptococcaceae;g__Streptococcus;s__Streptococcus macedonicus	CRISPR	99	iPHoP-RF;87.00
contig000920	vOTU000296	RS_GCF_000154985.1	d__Bacteria;p__Bacillota;c__Bacilli;o__Lactobacillales;f__Streptococcaceae;g__Streptococcus;s__Streptococcus infantarius	CRISPR	99	blast;81.90 iPHoP-RF;80.60
contig000920	vOTU000296	RS_GCF_004843545.1	d__Bacteria;p__Bacillota;c__Bacilli;o__Lactobacillales;f__Streptococcaceae;g__Streptococcus;s__Streptococcus pasteurianus	CRISPR	99	iPHoP-RF;83.90
contig000920	vOTU000296	RS_GCF_900475675.1	d__Bacteria;p__Bacillota;c__Bacilli;o__Lactobacillales;f__Streptococcaceae;g__Streptococcus;s__Streptococcus lutetiensis	CRISPR	99	blast;95.90 iPHoP-RF;90.50
contig000920	vOTU000296	RS_GCF_012277075.1	d__Bacteria;p__Bacillota;c__Bacilli;o__Lactobacillales;f__Streptococcaceae;g__Streptococcus;s__Streptococcus alactolyticus	CRISPR	97.7	blast;92.10 iPHoP-RF;85.40
contig000920	vOTU000296	RS_GCF_002000985.1	d__Bacteria;p__Bacillota;c__Bacilli;o__Lactobacillales;f__Streptococcaceae;g__Streptococcus;s__Streptococcus gallolyticus	blast	93.6	iPHoP-RF;71.10
contig000920	vOTU000296	RS_GCF_011039275.1	d__Bacteria;p__Bacillota;c__Bacilli;o__Lactobacillales;f__Streptococcaceae;g__Streptococcus;s__Streptococcus hyointestinalis_A	iPHoP-RF	93.4	None
contig000920	vOTU000296	RS_GCF_016908655.1	d__Bacteria;p__Bacillota;c__Bacilli;o__Lactobacillales;f__Streptococcaceae;g__Streptococcus;s__Streptococcus saliviloxodontae	iPHoP-RF	91.8	None
contig000920	vOTU000296	RS_GCF_023167545.1	d__Bacteria;p__Bacillota;c__Bacilli;o__Lactobacillales;f__Streptococcaceae;g__Streptococcus;s__Streptococcus constellatus	iPHoP-RF	91.8	None
contig000920	vOTU000296	RS_GCF_000380125.1	d__Bacteria;p__Bacillota;c__Bacilli;o__Lactobacillales;f__Streptococcaceae;g__Streptococcus;s__Streptococcus ovis	iPHoP-RF	91.4	None
contig000920	vOTU000296	RS_GCF_002760245.1	d__Bacteria;p__Bacillota;c__Bacilli;o__Lactobacillales;f__Streptococcaceae;g__Streptococcus;s__Streptococcus suis_I	iPHoP-RF	91.4	None
contig000920	vOTU000296	RS_GCF_902167705.1	d__Bacteria;p__Bacillota;c__Bacilli;o__Lactobacillales;f__Streptococcaceae;g__Streptococcus;s__Streptococcus constellatus_A	iPHoP-RF	91.1	None
contig000920	vOTU000296	RS_GCF_024170225.1	d__Bacteria;p__Bacillota;c__Bacilli;o__Lactobacillales;f__Streptococcaceae;g__Streptococcus;s__Streptococcus gallinaceus	iPHoP-RF	90.8	None
contig000920	vOTU000296	RS_GCF_900459405.1	d__Bacteria;p__Bacillota;c__Bacilli;o__Lactobacillales;f__Streptococcaceae;g__Streptococcus;s__Streptococcus hyointestinalis	iPHoP-RF	90.8	None
contig000920	vOTU000296	RS_GCF_004570575.1	d__Bacteria;p__Bacillota;c__Bacilli;o__Lactobacillales;f__Streptococcaceae;g__Streptococcus;s__Streptococcus cuniculi_A	iPHoP-RF	90.5	None
contig000921	vOTU000297	RS_GCF_000012825.1	d__Bacteria;p__Bacteroidota;c__Bacteroidia;o__Bacteroidales;f__Bacteroidaceae;g__Phocaeicola;s__Phocaeicola vulgatus	blast	90.7	None
contig000956	vOTU000304	MGYG000002229	d__Bacteria;p__Bacillota_A;c__Clostridia;o__Oscillospirales;f__Oscillospiraceae;g__Dysosmobacter;s__	blast	93.3	iPHoP-RF;63.30
contig000956	vOTU000304	GB_GCA_900546915.1	d__Bacteria;p__Bacillota_A;c__Clostridia;o__Oscillospirales;f__Oscillospiraceae;g__Faecousia;s__Faecousia gallistercoris	blast	90.4	None
contig000956	vOTU000304	GB_GCA_944387775.1	d__Bacteria;p__Bacillota_A;c__Clostridia;o__Oscillospirales;f__Oscillospiraceae;g__Pelethomonas;s__Pelethomonas sp944387775	blast	90.1	iPHoP-RF;68.90
contig000965	vOTU000305	GB_GCA_944326705.1	d__Bacteria;p__Deferribacterota;c__Deferribacteres;o__Deferribacterales;f__Mucispirillaceae;g__Mucispirillum;s__Mucispirillum sp944326705	blast	92.1	None
contig000965	vOTU000305	GB_GCA_944324465.1	d__Bacteria;p__Deferribacterota;c__Deferribacteres;o__Deferribacterales;f__Mucispirillaceae;g__Mucispirillum;s__Mucispirillum sp944324465	blast	92	None
contig000965	vOTU000305	GB_GCA_910586745.1	d__Bacteria;p__Deferribacterota;c__Deferribacteres;o__Deferribacterales;f__Mucispirillaceae;g__Mucispirillum;s__Mucispirillum sp910586745	blast	91.9	None
contig000965	vOTU000305	RS_GCF_000487995.2	d__Bacteria;p__Deferribacterota;c__Deferribacteres;o__Deferribacterales;f__Mucispirillaceae;g__Mucispirillum;s__Mucispirillum schaedleri	blast	90.8	None
contig000965	vOTU000305	GB_GCA_944323205.1	d__Bacteria;p__Deferribacterota;c__Deferribacteres;o__Deferribacterales;f__Mucispirillaceae;g__Mucispirillum;s__Mucispirillum sp944323205	blast	90.5	None
contig000970	vOTU000306	GB_GCA_900768915.1	d__Bacteria;p__Cyanobacteriota;c__Vampirovibrionia;o__Gastranaerophilales;f__Gastranaerophilaceae;g__UBA2883;s__UBA2883 sp900768915	blast	91.4	None
contig000972	vOTU072559	GB_GCA_000980375.1	d__Bacteria;p__Cyanobacteriota;c__Vampirovibrionia;o__Gastranaerophilales;f__Gastranaerophilaceae;g__Limenecus;s__Limenecus avicola	blast	93.2	iPHoP-RF;70.40
contig000972	vOTU072559	GB_GCA_001765415.1	d__Bacteria;p__Cyanobacteriota;c__Vampirovibrionia;o__Gastranaerophilales;f__Gastranaerophilaceae;g__Stercorousia;s__Stercorousia sp001765415	blast	90.9	iPHoP-RF;63.00
contig000986	vOTU000308	GB_GCA_002305795.1	d__Bacteria;p__Bacillota_A;c__Clostridia;o__Oscillospirales;f__Ruminococcaceae;g__Egerieicola;s__Egerieicola faecale	blast	95.6	iPHoP-RF;71.50
contig000988	vOTU000250	MGYG000231821	d__Bacteria;p__Bacillota;c__Bacilli;o__Erysipelotrichales;f__Coprobacillaceae;g__Thomasclavelia;s__	iPHoP-RF	93.4	None
contig000988	vOTU000250	MGYG000195400	d__Bacteria;p__Bacillota;c__Bacilli;o__Erysipelotrichales;f__Coprobacillaceae;g__Thomasclavelia;s__	iPHoP-RF	92.8	None
contig000988	vOTU000250	RS_GCF_000455285.1	d__Bacteria;p__Bacillota;c__Bacilli;o__Erysipelotrichales;f__Coprobacillaceae;g__Stoquefichus;s__Stoquefichus massiliensis	iPHoP-RF	90.5	None
contig001003	vOTU000316	GB_GCA_944325145.1	d__Bacteria;p__Cyanobacteriota;c__Vampirovibrionia;o__Gastranaerophilales;f__RUG14156;g__Galligastranaerophilus_A;s__Galligastranaerophilus_A sp944325145	iPHoP-RF	95.1	blast;91.60
contig001003	vOTU000316	GB_GCA_018715855.1	d__Bacteria;p__Cyanobacteriota;c__Vampirovibrionia;o__Gastranaerophilales;f__RUG14156;g__Galligastranaerophilus_A;s__Galligastranaerophilus_A intestinigallinarum	iPHoP-RF	93.4	None
contig001025	vOTU000324	GB_GCA_900016875.1	d__Bacteria;p__Bacillota_A;c__Clostridia;o__Lachnospirales;f__Lachnospiraceae;g__Anaerobutyricum;s__Anaerobutyricum stercoris	blast	91.1	iPHoP-RF;75.40
contig001044	vOTU000330	GB_GCA_018712465.1	d__Bacteria;p__Bacillota_A;c__Clostridia;o__Oscillospirales;f__Ruminococcaceae;g__Egerieicola;s__Egerieicola pullicola	blast	93.6	iPHoP-RF;66.50
contig001044	vOTU000330	GB_GCA_002305795.1	d__Bacteria;p__Bacillota_A;c__Clostridia;o__Oscillospirales;f__Ruminococcaceae;g__Egerieicola;s__Egerieicola faecale	blast	91.8	iPHoP-RF;63.30
contig001074	vOTU000340	MGYG000313399	d__Bacteria;p__Bacillota_A;c__Clostridia;o__TANB77;f__CAG-508;g__UMGS1864;s__	blast	93.9	None
contig001117	vOTU000351	GB_GCA_018713305.1	d__Bacteria;p__Bacillota_A;c__Clostridia;o__Christensenellales;f__CAG-74;g__Avichristensenella;s__Avichristensenella intestinipullorum	blast	96.6	iPHoP-RF;71.10
contig001126	vOTU000354	GB_GCA_018712075.1	d__Bacteria;p__Bacillota_A;c__Clostridia;o__Lachnospirales;f__Lachnospiraceae;g__Fimimorpha;s__Fimimorpha faecalis	CRISPR	94.8	blast;91.80 iPHoP-RF;88.90
contig001126	vOTU000354	GB_GCA_900045905.1	d__Bacteria;p__Bacillota_A;c__Clostridia;o__Lachnospirales;f__Lachnospiraceae;g__Fimimorpha;s__Fimimorpha sp900045905	blast	91.1	iPHoP-RF;88.90
contig001145	vOTU000362	GB_GCA_910575755.1	d__Bacteria;p__Desulfobacterota;c__Desulfovibrionia;o__Desulfovibrionales;f__Desulfovibrionaceae;g__Desulfovibrio;s__Desulfovibrio sp910575755	blast	93.6	iPHoP-RF;85.40
contig001145	vOTU000362	RS_GCF_012843875.1	d__Bacteria;p__Desulfobacterota;c__Desulfovibrionia;o__Desulfovibrionales;f__Desulfovibrionaceae;g__Desulfovibrio;s__Desulfovibrio sp900556755	blast	92	iPHoP-RF;91.10 CRISPR;72.40
contig001145	vOTU000362	RS_GCF_000156375.1	d__Bacteria;p__Desulfobacterota;c__Desulfovibrionia;o__Desulfovibrionales;f__Desulfovibrionaceae;g__Desulfovibrio;s__Desulfovibrio piger	blast	91.8	iPHoP-RF;91.40
contig001145	vOTU000362	GB_GCA_019422935.1	d__Bacteria;p__Desulfobacterota;c__Desulfovibrionia;o__Desulfovibrionales;f__Desulfovibrionaceae;g__Desulfovibrio;s__Desulfovibrio sp019422935	iPHoP-RF	91.4	None
contig001145	vOTU000362	RS_GCF_022508225.1	d__Bacteria;p__Desulfobacterota;c__Desulfovibrionia;o__Desulfovibrionales;f__Desulfovibrionaceae;g__Desulfovibrio;s__Desulfovibrio sp022508225	iPHoP-RF	91.4	None
contig001145	vOTU000362	RS_GCF_900116045.1	d__Bacteria;p__Desulfobacterota;c__Desulfovibrionia;o__Desulfovibrionales;f__Desulfovibrionaceae;g__Desulfovibrio;s__Desulfovibrio piger_A	iPHoP-RF	91.4	blast;91.30
contig001145	vOTU000362	MGYG000179013	d__Bacteria;p__Desulfobacterota;c__Desulfovibrionia;o__Desulfovibrionales;f__Desulfovibrionaceae;g__Desulfovibrio;s__	iPHoP-RF	91.1	None
contig001145	vOTU000362	MGYG000269208	d__Bacteria;p__Desulfobacterota;c__Desulfovibrionia;o__Desulfovibrionales;f__Desulfovibrionaceae;g__Desulfovibrio;s__	iPHoP-RF	90.5	None
contig001145	vOTU000362	GB_GCA_023419375.1	d__Bacteria;p__Desulfobacterota;c__Desulfovibrionia;o__Desulfovibrionales;f__Desulfovibrionaceae;g__Desulfovibrio;s__Desulfovibrio sp023419375	iPHoP-RF	90.1	None
contig001170	vOTU000369	GB_GCA_900755095.1	d__Bacteria;p__Bacteroidota;c__Bacteroidia;o__Bacteroidales;f__Bacteroidaceae;g__Bacteroides;s__Bacteroides sp900755095	iPHoP-RF	97.1	None
contig001170	vOTU000369	GB_GCA_905215555.1	d__Bacteria;p__Bacteroidota;c__Bacteroidia;o__Bacteroidales;f__Bacteroidaceae;g__Bacteroides;s__Bacteroides sp905215555	iPHoP-RF	97.1	None
contig001170	vOTU000369	RS_GCF_009193295.2	d__Bacteria;p__Bacteroidota;c__Bacteroidia;o__Bacteroidales;f__Bacteroidaceae;g__Bacteroides;s__Bacteroides luhongzhouii	iPHoP-RF	97.1	None
contig001170	vOTU000369	RS_GCF_900106755.1	d__Bacteria;p__Bacteroidota;c__Bacteroidia;o__Bacteroidales;f__Bacteroidaceae;g__Bacteroides;s__Bacteroides faecis	iPHoP-RF	97.1	CRISPR;94.30
contig001170	vOTU000369	RS_GCF_000157915.1	d__Bacteria;p__Bacteroidota;c__Bacteroidia;o__Bacteroidales;f__Bacteroidaceae;g__Phocaeicola;s__Phocaeicola coprophilus	blast	96.9	iPHoP-RF;64.00
contig001170	vOTU000369	RS_GCF_000187895.1	d__Bacteria;p__Bacteroidota;c__Bacteroidia;o__Bacteroidales;f__Bacteroidaceae;g__Phocaeicola;s__Phocaeicola plebeius	blast	96.9	iPHoP-RF;96.10
contig001170	vOTU000369	RS_GCF_003437535.1	d__Bacteria;p__Bacteroidota;c__Bacteroidia;o__Bacteroidales;f__Bacteroidaceae;g__Phocaeicola;s__Phocaeicola plebeius_A	blast	96.9	CRISPR;95.00 iPHoP-RF;94.10
contig001170	vOTU000369	RS_GCF_000210075.1	d__Bacteria;p__Bacteroidota;c__Bacteroidia;o__Bacteroidales;f__Bacteroidaceae;g__Bacteroides;s__Bacteroides xylanisolvens	iPHoP-RF	96.7	None
contig001170	vOTU000369	RS_GCF_900142015.1	d__Bacteria;p__Bacteroidota;c__Bacteroidia;o__Bacteroidales;f__Bacteroidaceae;g__Bacteroides;s__Bacteroides stercorirosoris	iPHoP-RF	96.7	None
contig001170	vOTU000369	RS_GCF_903181435.1	d__Bacteria;p__Bacteroidota;c__Bacteroidia;o__Bacteroidales;f__Bacteroidaceae;g__Bacteroides;s__Bacteroides sp900765785	iPHoP-RF	96.7	None
contig001170	vOTU000369	RS_GCF_001314995.1	d__Bacteria;p__Bacteroidota;c__Bacteroidia;o__Bacteroidales;f__Bacteroidaceae;g__Bacteroides;s__Bacteroides ovatus	iPHoP-RF	96.4	None
contig001170	vOTU000369	RS_GCF_002222615.2	d__Bacteria;p__Bacteroidota;c__Bacteroidia;o__Bacteroidales;f__Bacteroidaceae;g__Bacteroides;s__Bacteroides caccae	iPHoP-RF	96.4	None
contig001170	vOTU000369	RS_GCF_024623065.1	d__Bacteria;p__Bacteroidota;c__Bacteroidia;o__Bacteroidales;f__Bacteroidaceae;g__Bacteroides;s__Bacteroides acidifaciens	iPHoP-RF	96.4	None
contig001170	vOTU000369	GB_GCA_902362595.1	d__Bacteria;p__Bacteroidota;c__Bacteroidia;o__Bacteroidales;f__Bacteroidaceae;g__Phocaeicola;s__Phocaeicola merdigallinarum	CRISPR	96.3	blast;87.80 iPHoP-RF;75.00
contig001170	vOTU000369	GB_GCA_902362375.1	d__Bacteria;p__Bacteroidota;c__Bacteroidia;o__Bacteroidales;f__Bacteroidaceae;g__Bacteroides;s__Bacteroides sp902362375	iPHoP-RF	96.1	None
contig001170	vOTU000369	MGYG000004003	d__Bacteria;p__Bacteroidota;c__Bacteroidia;o__Bacteroidales;f__Bacteroidaceae;g__Bacteroides;s__	iPHoP-RF	96.1	None
contig001170	vOTU000369	RS_GCF_001688725.2	d__Bacteria;p__Bacteroidota;c__Bacteroidia;o__Bacteroidales;f__Bacteroidaceae;g__Bacteroides;s__Bacteroides caecimuris	iPHoP-RF	96.1	None
contig001170	vOTU000369	RS_GCF_003464595.1	d__Bacteria;p__Bacteroidota;c__Bacteroidia;o__Bacteroidales;f__Bacteroidaceae;g__Bacteroides;s__Bacteroides intestinalis_A	iPHoP-RF	96.1	None
contig001170	vOTU000369	RS_GCF_014334015.1	d__Bacteria;p__Bacteroidota;c__Bacteroidia;o__Bacteroidales;f__Bacteroidaceae;g__Bacteroides;s__Bacteroides intestinigallinarum	iPHoP-RF	96.1	None
contig001170	vOTU000369	RS_GCF_000025985.1	d__Bacteria;p__Bacteroidota;c__Bacteroidia;o__Bacteroidales;f__Bacteroidaceae;g__Bacteroides;s__Bacteroides fragilis	iPHoP-RF	95.7	CRISPR;94.60
contig001170	vOTU000369	GB_GCA_905207245.1	d__Bacteria;p__Bacteroidota;c__Bacteroidia;o__Bacteroidales;f__Bacteroidaceae;g__Bacteroides;s__Bacteroides sp905207245	iPHoP-RF	95.4	None
contig001170	vOTU000369	RS_GCF_009193325.2	d__Bacteria;p__Bacteroidota;c__Bacteroidia;o__Bacteroidales;f__Bacteroidaceae;g__Bacteroides;s__Bacteroides zhangwenhongii	iPHoP-RF	95.4	None
contig001170	vOTU000369	GB_GCA_900544675.1	d__Bacteria;p__Bacteroidota;c__Bacteroidia;o__Bacteroidales;f__Bacteroidaceae;g__Phocaeicola;s__Phocaeicola sp900544675	CRISPR	95.2	None
contig001170	vOTU000369	RS_GCF_000011065.1	d__Bacteria;p__Bacteroidota;c__Bacteroidia;o__Bacteroidales;f__Bacteroidaceae;g__Bacteroides;s__Bacteroides thetaiotaomicron	iPHoP-RF	95.1	None
contig001170	vOTU000369	RS_GCF_000315485.1	d__Bacteria;p__Bacteroidota;c__Bacteroidia;o__Bacteroidales;f__Bacteroidaceae;g__Bacteroides;s__Bacteroides oleiciplenus	iPHoP-RF	95.1	None
contig001170	vOTU000369	RS_GCF_900155865.1	d__Bacteria;p__Bacteroidota;c__Bacteroidia;o__Bacteroidales;f__Bacteroidaceae;g__Bacteroides;s__Bacteroides bouchesdurhonensis	iPHoP-RF	95.1	None
contig001170	vOTU000369	GB_GCA_934716785.1	d__Bacteria;p__Bacteroidota;c__Bacteroidia;o__Bacteroidales;f__Bacteroidaceae;g__Bacteroides;s__Bacteroides sp934716785	iPHoP-RF	94.7	None
contig001170	vOTU000369	RS_GCF_014750685.1	d__Bacteria;p__Bacteroidota;c__Bacteroidia;o__Bacteroidales;f__Bacteroidaceae;g__Bacteroides;s__Bacteroides sp014750685	iPHoP-RF	94.7	None
contig001170	vOTU000369	RS_GCF_000156195.1	d__Bacteria;p__Bacteroidota;c__Bacteroidia;o__Bacteroidales;f__Bacteroidaceae;g__Bacteroides;s__Bacteroides finegoldii	iPHoP-RF	94.4	None
contig001170	vOTU000369	RS_GCF_012113595.1	d__Bacteria;p__Bacteroidota;c__Bacteroidia;o__Bacteroidales;f__Bacteroidaceae;g__Bacteroides;s__Bacteroides sp012113595	iPHoP-RF	94.4	None
contig001170	vOTU000369	GB_GCA_025147485.1	d__Bacteria;p__Bacteroidota;c__Bacteroidia;o__Bacteroidales;f__Bacteroidaceae;g__Bacteroides;s__Bacteroides uniformis	CRISPR	94.3	iPHoP-RF;88.90
contig001170	vOTU000369	RS_GCF_016900355.1	d__Bacteria;p__Bacteroidota;c__Bacteroidia;o__Bacteroidales;f__Bacteroidaceae;g__Phocaeicola;s__Phocaeicola sp900551065	blast	93.8	iPHoP-RF;87.00
contig001170	vOTU000369	GB_GCA_900761785.1	d__Bacteria;p__Bacteroidota;c__Bacteroidia;o__Bacteroidales;f__Bacteroidaceae;g__Bacteroides;s__Bacteroides sp900761785	iPHoP-RF	93.7	None
contig001170	vOTU000369	MGYG000259441	d__Bacteria;p__Bacteroidota;c__Bacteroidia;o__Bacteroidales;f__Bacteroidaceae;g__Phocaeicola;s__	blast	93.4	iPHoP-RF;61.90
contig001170	vOTU000369	RS_GCF_900130125.1	d__Bacteria;p__Bacteroidota;c__Bacteroidia;o__Bacteroidales;f__Bacteroidaceae;g__Bacteroides;s__Bacteroides congonensis	iPHoP-RF	93.4	None
contig001170	vOTU000369	RS_GCF_000374585.1	d__Bacteria;p__Bacteroidota;c__Bacteroidia;o__Bacteroidales;f__Bacteroidaceae;g__Phocaeicola;s__Phocaeicola barnesiae	blast	93.3	iPHoP-RF;57.30
contig001170	vOTU000369	MGYG000065103	d__Bacteria;p__Bacteroidota;c__Bacteroidia;o__Bacteroidales;f__Bacteroidaceae;g__Bacteroides;s__	iPHoP-RF	93.1	None
contig001170	vOTU000369	RS_GCF_000154845.1	d__Bacteria;p__Bacteroidota;c__Bacteroidia;o__Bacteroidales;f__Bacteroidaceae;g__Phocaeicola;s__Phocaeicola coprocola	CRISPR	93	blast;82.00 iPHoP-RF;54.90
contig001170	vOTU000369	MGYG000075951	d__Bacteria;p__Bacteroidota;c__Bacteroidia;o__Bacteroidales;f__Bacteroidaceae;g__Bacteroides;s__	iPHoP-RF	92.8	None
contig001170	vOTU000369	GB_GCA_900547205.1	d__Bacteria;p__Bacteroidota;c__Bacteroidia;o__Bacteroidales;f__Bacteroidaceae;g__Bacteroides;s__Bacteroides sp900547205	iPHoP-RF	90.5	None
contig001170	vOTU000369	RS_GCF_902364365.1	d__Bacteria;p__Bacteroidota;c__Bacteroidia;o__Bacteroidales;f__Bacteroidaceae;g__Bacteroides;s__Bacteroides sp900556215	iPHoP-RF	90.5	None
contig001170	vOTU000369	RS_GCF_000513195.1	d__Bacteria;p__Bacteroidota;c__Bacteroidia;o__Bacteroidales;f__Bacteroidaceae;g__Bacteroides;s__Bacteroides timonensis	iPHoP-RF	90.1	None
contig001171	vOTU000370	RS_GCF_021531075.1	d__Bacteria;p__Bacteroidota;c__Bacteroidia;o__Bacteroidales;f__Bacteroidaceae;g__Phocaeicola;s__Phocaeicola caecigallinarum_B	iPHoP-RF	95.7	blast;93.60
contig001171	vOTU000370	RS_GCF_016902295.1	d__Bacteria;p__Bacteroidota;c__Bacteroidia;o__Bacteroidales;f__Bacteroidaceae;g__Phocaeicola;s__Phocaeicola caecigallinarum_A	blast	94.6	iPHoP-RF;93.40
contig001171	vOTU000370	GB_GCA_900544075.1	d__Bacteria;p__Bacteroidota;c__Bacteroidia;o__Bacteroidales;f__Bacteroidaceae;g__Phocaeicola;s__Phocaeicola sp900544075	blast	94.2	iPHoP-RF;88.20
contig001171	vOTU000370	GB_GCA_944322395.1	d__Bacteria;p__Bacteroidota;c__Bacteroidia;o__Bacteroidales;f__Bacteroidaceae;g__Phocaeicola;s__Phocaeicola sp944322395	iPHoP-RF	94.1	None
contig001171	vOTU000370	RS_GCF_016901995.1	d__Bacteria;p__Bacteroidota;c__Bacteroidia;o__Bacteroidales;f__Bacteroidaceae;g__Phocaeicola;s__Phocaeicola sp900066445	blast	94.1	iPHoP-RF;91.10
contig001171	vOTU000370	RS_GCF_021530995.1	d__Bacteria;p__Bacteroidota;c__Bacteroidia;o__Bacteroidales;f__Bacteroidaceae;g__Phocaeicola;s__Phocaeicola faecigallinarum	iPHoP-RF	94.1	blast;93.50
contig001171	vOTU000370	GB_GCA_944320605.1	d__Bacteria;p__Bacteroidota;c__Bacteroidia;o__Bacteroidales;f__Bacteroidaceae;g__Phocaeicola;s__Phocaeicola sp944320605	blast	92.9	iPHoP-RF;74.30
contig001171	vOTU000370	GB_GCA_018884025.1	d__Bacteria;p__Bacteroidota;c__Bacteroidia;o__Bacteroidales;f__Bacteroidaceae;g__Phocaeicola;s__Phocaeicola faecipullorum	blast	92.1	iPHoP-RF;78.50
contig001171	vOTU000370	RS_GCF_020091405.1	d__Bacteria;p__Bacteroidota;c__Bacteroidia;o__Bacteroidales;f__Bacteroidaceae;g__Bacteroides;s__Bacteroides sp900552405	CRISPR	90.3	None
contig001187	vOTU013195	RS_GCF_016902295.1	d__Bacteria;p__Bacteroidota;c__Bacteroidia;o__Bacteroidales;f__Bacteroidaceae;g__Phocaeicola;s__Phocaeicola caecigallinarum_A	blast	96.1	iPHoP-RF;65.80
contig001187	vOTU013195	GB_GCA_900544075.1	d__Bacteria;p__Bacteroidota;c__Bacteroidia;o__Bacteroidales;f__Bacteroidaceae;g__Phocaeicola;s__Phocaeicola sp900544075	blast	92.7	iPHoP-RF;85.10
contig001187	vOTU013195	GB_GCA_944320855.1	d__Bacteria;p__Bacteroidota;c__Bacteroidia;o__Bacteroidales;f__Bacteroidaceae;g__Phocaeicola;s__Phocaeicola sp944320855	blast	92.6	iPHoP-RF;68.40
contig001187	vOTU013195	RS_GCF_000210075.1	d__Bacteria;p__Bacteroidota;c__Bacteroidia;o__Bacteroidales;f__Bacteroidaceae;g__Bacteroides;s__Bacteroides xylanisolvens	blast	92	iPHoP-RF;72.80
contig001187	vOTU013195	GB_GCA_944322395.1	d__Bacteria;p__Bacteroidota;c__Bacteroidia;o__Bacteroidales;f__Bacteroidaceae;g__Phocaeicola;s__Phocaeicola sp944322395	blast	91.7	iPHoP-RF;81.40
contig001187	vOTU013195	RS_GCF_001314995.1	d__Bacteria;p__Bacteroidota;c__Bacteroidia;o__Bacteroidales;f__Bacteroidaceae;g__Bacteroides;s__Bacteroides ovatus	blast	91.4	iPHoP-RF;69.80
contig001187	vOTU013195	RS_GCF_021531075.1	d__Bacteria;p__Bacteroidota;c__Bacteroidia;o__Bacteroidales;f__Bacteroidaceae;g__Phocaeicola;s__Phocaeicola caecigallinarum_B	blast	90.9	iPHoP-RF;82.80
contig001187	vOTU013195	GB_GCA_018884025.1	d__Bacteria;p__Bacteroidota;c__Bacteroidia;o__Bacteroidales;f__Bacteroidaceae;g__Phocaeicola;s__Phocaeicola faecipullorum	blast	90.1	iPHoP-RF;70.40
contig001191	vOTU000379	GB_GCA_004553625.1	d__Bacteria;p__Bacillota_A;c__Clostridia;o__Oscillospirales;f__Oscillospiraceae;g__Scatomorpha;s__Scatomorpha merdavium	CRISPR	98.8	iPHoP-RF;51.20
contig001191	vOTU000379	GB_GCA_900546615.1	d__Bacteria;p__Bacillota_A;c__Clostridia;o__Oscillospirales;f__Oscillospiraceae;g__Scatomorpha;s__Scatomorpha pullistercoris	CRISPR	98.8	None
contig001191	vOTU000379	GB_GCA_900543085.1	d__Bacteria;p__Bacillota_A;c__Clostridia;o__Oscillospirales;f__Oscillospiraceae;g__Scatomorpha;s__Scatomorpha pullicola	CRISPR	98.7	iPHoP-RF;60.10
contig001191	vOTU000379	GB_GCA_900544295.1	d__Bacteria;p__Bacillota_A;c__Clostridia;o__Oscillospirales;f__Oscillospiraceae;g__Scatomorpha;s__Scatomorpha intestinigallinarum	CRISPR	98.6	None
contig001191	vOTU000379	GB_GCA_900759385.1	d__Bacteria;p__Bacillota_A;c__Clostridia;o__Oscillospirales;f__Oscillospiraceae;g__Scatomorpha;s__Scatomorpha sp900759385	CRISPR	98.6	None
contig001191	vOTU000379	GB_GCA_018713375.1	d__Bacteria;p__Bacillota_A;c__Clostridia;o__Oscillospirales;f__Oscillospiraceae;g__Scatomorpha;s__Scatomorpha stercorigallinarum	CRISPR	98.5	iPHoP-RF;60.90
contig001193	vOTU000380	GB_GCA_900546615.1	d__Bacteria;p__Bacillota_A;c__Clostridia;o__Oscillospirales;f__Oscillospiraceae;g__Scatomorpha;s__Scatomorpha pullistercoris	CRISPR	98.6	blast;91.20 iPHoP-RF;74.10
contig001193	vOTU000380	GB_GCA_900544295.1	d__Bacteria;p__Bacillota_A;c__Clostridia;o__Oscillospirales;f__Oscillospiraceae;g__Scatomorpha;s__Scatomorpha intestinigallinarum	CRISPR	97.4	blast;96.20 iPHoP-RF;84.20
contig001193	vOTU000380	GB_GCA_900545405.1	d__Bacteria;p__Bacillota_A;c__Clostridia;o__Oscillospirales;f__Oscillospiraceae;g__Scatomorpha;s__Scatomorpha sp900545405	blast	96.8	iPHoP-RF;93.10
contig001193	vOTU000380	GB_GCA_944385815.1	d__Bacteria;p__Bacillota_A;c__Clostridia;o__Oscillospirales;f__Oscillospiraceae;g__Scatomorpha;s__Scatomorpha sp944385815	iPHoP-RF	95.7	None
contig001193	vOTU000380	GB_GCA_944385795.1	d__Bacteria;p__Bacillota_A;c__Clostridia;o__Oscillospirales;f__Oscillospiraceae;g__Scatomorpha;s__Scatomorpha sp944385795	iPHoP-RF	95.4	None
contig001193	vOTU000380	GB_GCA_004553625.1	d__Bacteria;p__Bacillota_A;c__Clostridia;o__Oscillospirales;f__Oscillospiraceae;g__Scatomorpha;s__Scatomorpha merdavium	CRISPR	95.1	None
contig001193	vOTU000380	GB_GCA_944387285.1	d__Bacteria;p__Bacillota_A;c__Clostridia;o__Oscillospirales;f__Oscillospiraceae;g__Scatomorpha;s__Scatomorpha sp944387285	blast	91.3	iPHoP-RF;54.60
contig001193	vOTU000380	GB_GCA_018716005.1	d__Bacteria;p__Bacillota_A;c__Clostridia;o__Oscillospirales;f__Oscillospiraceae;g__Scatomorpha;s__Scatomorpha stercoravium	iPHoP-RF	90.8	None
contig001193	vOTU000380	GB_GCA_900544765.1	d__Bacteria;p__Bacillota_A;c__Clostridia;o__Oscillospirales;f__Oscillospiraceae;g__Scatomorpha;s__Scatomorpha gallistercoris	blast	90.8	iPHoP-RF;60.90
contig001215	vOTU000389	RS_GCF_021531075.1	d__Bacteria;p__Bacteroidota;c__Bacteroidia;o__Bacteroidales;f__Bacteroidaceae;g__Phocaeicola;s__Phocaeicola caecigallinarum_B	iPHoP-RF	95.1	blast;91.90
contig001215	vOTU000389	RS_GCF_016901995.1	d__Bacteria;p__Bacteroidota;c__Bacteroidia;o__Bacteroidales;f__Bacteroidaceae;g__Phocaeicola;s__Phocaeicola sp900066445	iPHoP-RF	93.4	blast;92.10
contig001215	vOTU000389	GB_GCA_944322395.1	d__Bacteria;p__Bacteroidota;c__Bacteroidia;o__Bacteroidales;f__Bacteroidaceae;g__Phocaeicola;s__Phocaeicola sp944322395	iPHoP-RF	93.1	None
contig001215	vOTU000389	RS_GCF_016902295.1	d__Bacteria;p__Bacteroidota;c__Bacteroidia;o__Bacteroidales;f__Bacteroidaceae;g__Phocaeicola;s__Phocaeicola caecigallinarum_A	blast	91.8	iPHoP-RF;87.00
contig001215	vOTU000389	GB_GCA_944320855.1	d__Bacteria;p__Bacteroidota;c__Bacteroidia;o__Bacteroidales;f__Bacteroidaceae;g__Phocaeicola;s__Phocaeicola sp944320855	iPHoP-RF	91.4	None
contig001215	vOTU000389	RS_GCF_021530995.1	d__Bacteria;p__Bacteroidota;c__Bacteroidia;o__Bacteroidales;f__Bacteroidaceae;g__Phocaeicola;s__Phocaeicola faecigallinarum	blast	90.5	iPHoP-RF;86.30 CRISPR;63.70
contig001215	vOTU000389	GB_GCA_018884025.1	d__Bacteria;p__Bacteroidota;c__Bacteroidia;o__Bacteroidales;f__Bacteroidaceae;g__Phocaeicola;s__Phocaeicola faecipullorum	blast	90.2	iPHoP-RF;89.20
contig001215	vOTU000389	GB_GCA_900544075.1	d__Bacteria;p__Bacteroidota;c__Bacteroidia;o__Bacteroidales;f__Bacteroidaceae;g__Phocaeicola;s__Phocaeicola sp900544075	iPHoP-RF	90.1	blast;90.00
contig001232	vOTU000398	GB_GCA_001917125.1	d__Bacteria;p__Pseudomonadota;c__Alphaproteobacteria;o__RF32;f__CAG-239;g__Scatocola;s__Scatocola faecipullorum	blast	93.6	iPHoP-RF;67.00
contig001233	vOTU000399	GB_GCA_018714845.1	d__Bacteria;p__Bacillota_A;c__Clostridia;o__Oscillospirales;f__Butyricicoccaceae;g__Ventrousia;s__Ventrousia excrementavium	blast	92.4	iPHoP-RF;55.40
contig001233	vOTU000399	GB_GCA_902363045.1	d__Bacteria;p__Bacillota_A;c__Clostridia;o__Oscillospirales;f__Oscillospiraceae;g__Lawsonibacter;s__Lawsonibacter sp902363045	blast	92.3	iPHoP-RF;63.30
contig001233	vOTU000399	GB_GCA_902362775.1	d__Bacteria;p__Bacillota_A;c__Clostridia;o__Oscillospirales;f__Oscillospiraceae;g__Lawsonibacter;s__Lawsonibacter sp900066645	blast	91.8	iPHoP-RF;57.10
contig001234	vOTU000400	GB_GCA_019116585.1	d__Bacteria;p__Bacillota_A;c__Clostridia;o__Oscillospirales;f__Ruminococcaceae;g__Faecalibacterium;s__Faecalibacterium gallistercoris	CRISPR	98.9	blast;94.60 iPHoP-RF;86.70
contig001234	vOTU000400	GB_GCA_019119685.1	d__Bacteria;p__Bacillota_A;c__Clostridia;o__Oscillospirales;f__Ruminococcaceae;g__Faecalibacterium;s__Faecalibacterium faecigallinarum	CRISPR	98.9	blast;91.80 iPHoP-RF;82.50
contig001234	vOTU000400	RS_GCF_020687245.1	d__Bacteria;p__Bacillota_A;c__Clostridia;o__Oscillospirales;f__Ruminococcaceae;g__Faecalibacterium;s__Faecalibacterium longum	CRISPR	98.8	iPHoP-RF;73.90
contig001234	vOTU000400	RS_GCF_002549775.1	d__Bacteria;p__Bacillota_A;c__Clostridia;o__Oscillospirales;f__Ruminococcaceae;g__Faecalibacterium;s__Faecalibacterium prausnitzii_F	CRISPR	98.6	iPHoP-RF;61.10
contig001251	vOTU000404	GB_GCA_900769625.1	d__Bacteria;p__Bacillota_A;c__Clostridia;o__Clostridiales;f__Clostridiaceae;g__Clostridium;s__Clostridium sp900769625	iPHoP-RF	91.1	None
contig001252	vOTU000405	RS_GCF_002160755.1	d__Bacteria;p__Bacillota_A;c__Clostridia;o__Lachnospirales;f__Lachnospiraceae;g__Lachnoclostridium_A;s__Lachnoclostridium_A sp002160755	blast	96.3	None
contig001252	vOTU000405	RS_GCF_020736365.1	d__Bacteria;p__Bacillota_A;c__Clostridia;o__Lachnospirales;f__Lachnospiraceae;g__Clostridium_Q;s__Clostridium_Q saccharolyticum_A	blast	95.4	None
contig001252	vOTU000405	GB_GCA_017889125.1	d__Bacteria;p__Bacillota_A;c__Clostridia;o__Lachnospirales;f__Lachnospiraceae;g__Caccovicinus;s__Caccovicinus sp017889125	blast	94.4	None
contig001252	vOTU000405	GB_GCA_900016875.1	d__Bacteria;p__Bacillota_A;c__Clostridia;o__Lachnospirales;f__Lachnospiraceae;g__Anaerobutyricum;s__Anaerobutyricum stercoris	blast	91.8	None
contig001252	vOTU000405	RS_GCF_003201875.1	d__Bacteria;p__Bacillota_A;c__Clostridia;o__Lachnospirales;f__Lachnospiraceae;g__Hungatella;s__Hungatella effluvii	blast	90.3	None
contig001259	vOTU000406	GB_GCA_018711035.1	d__Bacteria;p__Cyanobacteriota;c__Vampirovibrionia;o__Gastranaerophilales;f__Gastranaerophilaceae;g__Scatousia;s__Scatousia excrementigallinarum	CRISPR	97.4	iPHoP-RF;67.50
contig001259	vOTU000406	GB_GCA_000438175.1	d__Bacteria;p__Cyanobacteriota;c__Vampirovibrionia;o__Gastranaerophilales;f__Gastranaerophilaceae;g__Stercorousia;s__Stercorousia faecigallinarum	CRISPR	94.8	iPHoP-RF;70.90
contig001262	vOTU000409	GB_GCA_944376335.1	d__Bacteria;p__Bacillota_A;c__Clostridia;o__Christensenellales;f__Borkfalkiaceae;g__Gallimonas;s__Gallimonas sp944376335	blast	90.3	None
contig001275	vOTU000418	RS_GCF_005121165.3	d__Bacteria;p__Bacillota_A;c__Clostridia;o__Oscillospirales;f__Oscillospiraceae;g__Dysosmobacter;s__Dysosmobacter welbionis	blast	90.9	iPHoP-RF;73.20
contig001279	vOTU000419	GB_GCA_934692675.1	d__Bacteria;p__Bacillota_A;c__Clostridia;o__Oscillospirales;f__Acutalibacteraceae;g__UMGS1491;s__UMGS1491 sp934692675	blast	93.3	iPHoP-RF;68.90
contig001279	vOTU000419	GB_GCA_900552265.1	d__Bacteria;p__Bacillota_A;c__Clostridia;o__Oscillospirales;f__Acutalibacteraceae;g__UMGS1491;s__UMGS1491 sp900552265	blast	90.9	iPHoP-RF;68.00
contig001284	vOTU000422	GB_GCA_000433015.1	d__Bacteria;p__Bacillota;c__Bacilli;o__RFN20;f__CAG-631;g__Caccosoma;s__Caccosoma faecigallinarum	blast	97.1	iPHoP-RF;54.40
contig001284	vOTU000422	GB_GCA_900754115.1	d__Bacteria;p__Bacillota;c__Bacilli;o__RFN20;f__CAG-631;g__Caccosoma;s__Caccosoma sp900754115	blast	96.2	iPHoP-RF;50.90
contig001289	vOTU000424	RS_GCF_900119385.1	d__Bacteria;p__Actinomycetota;c__Coriobacteriia;o__Coriobacteriales;f__Atopobiaceae;g__Thermophilibacter;s__Thermophilibacter mediterraneus	blast	98.8	iPHoP-RF;76.10
contig001294	vOTU000428	GB_GCA_944385395.1	d__Bacteria;p__Bacillota_A;c__Clostridia;o__Oscillospirales;f__Oscillospiraceae;g__Vescimonas;s__Vescimonas sp944385395	blast	93.5	iPHoP-RF;71.90
contig001313	vOTU000437	GB_GCA_019116585.1	d__Bacteria;p__Bacillota_A;c__Clostridia;o__Oscillospirales;f__Ruminococcaceae;g__Faecalibacterium;s__Faecalibacterium gallistercoris	blast	96.6	iPHoP-RF;66.50
contig001313	vOTU000437	GB_GCA_019119685.1	d__Bacteria;p__Bacillota_A;c__Clostridia;o__Oscillospirales;f__Ruminococcaceae;g__Faecalibacterium;s__Faecalibacterium faecigallinarum	blast	93.8	iPHoP-RF;73.50 CRISPR;68.00
contig001319	vOTU000439	GB_GCA_934565615.1	d__Bacteria;p__Bacillota_A;c__Clostridia;o__Oscillospirales;f__Oscillospiraceae;g__Limivicinus;s__Limivicinus sp934565615	iPHoP-RF	90.1	None
contig001319	vOTU000439	GB_GCA_934572355.1	d__Bacteria;p__Bacillota_A;c__Clostridia;o__Oscillospirales;f__Oscillospiraceae;g__Limivicinus;s__Limivicinus sp934572355	iPHoP-RF	90.1	None
contig001323	vOTU000440	GB_GCA_003573975.1	d__Bacteria;p__Bacillota_A;c__Clostridia;o__Oscillospirales;f__Oscillospiraceae;g__Lawsonibacter;s__Lawsonibacter sp900066825	blast	94.7	iPHoP-RF;64.30
contig001323	vOTU000440	GB_GCA_022846095.1	d__Bacteria;p__Bacillota_A;c__Clostridia;o__Oscillospirales;f__Oscillospiraceae;g__UMGS1202;s__UMGS1202 sp900549565	blast	93.6	iPHoP-RF;61.90
contig001323	vOTU000440	RS_GCF_000239295.1	d__Bacteria;p__Bacillota_A;c__Clostridia;o__Oscillospirales;f__Oscillospiraceae;g__Flavonifractor;s__Flavonifractor plautii	blast	90.2	iPHoP-RF;69.30
contig001325	vOTU138152	GB_GCA_904374805.1	d__Bacteria;p__Bacillota_A;c__Clostridia;o__Oscillospirales;f__Acutalibacteraceae;g__Acutalibacter;s__Acutalibacter pullicola	CRISPR	95.1	iPHoP-RF;77.10
contig001337	vOTU000446	GB_GCA_900547275.1	d__Bacteria;p__Bacillota_A;c__Clostridia;o__Oscillospirales;f__Acutalibacteraceae;g__CAG-217;s__CAG-217 sp900547275	blast	93.3	None
contig001338	vOTU000447	GB_GCA_904419835.1	d__Bacteria;p__Bacillota_A;c__Clostridia;o__Oscillospirales;f__Oscillospiraceae;g__Pseudoflavonifractor;s__Pseudoflavonifractor sp904419835	blast	93.6	CRISPR;89.30 iPHoP-RF;86.30
contig001338	vOTU000447	GB_GCA_944387805.1	d__Bacteria;p__Bacillota_A;c__Clostridia;o__Oscillospirales;f__Oscillospiraceae;g__Pseudoflavonifractor;s__Pseudoflavonifractor sp944387805	blast	91.2	iPHoP-RF;83.30 CRISPR;82.80
contig001341	vOTU000450	GB_GCA_019114345.1	d__Bacteria;p__Bacillota_A;c__Clostridia;o__Oscillospirales;f__Butyricicoccaceae;g__Agathobaculum;s__Agathobaculum pullistercoris	blast	96.9	iPHoP-RF;81.10
contig001341	vOTU000450	GB_GCA_019113065.1	d__Bacteria;p__Bacillota_A;c__Clostridia;o__Oscillospirales;f__Butyricicoccaceae;g__Agathobaculum;s__Agathobaculum stercoravium	blast	96.8	CRISPR;77.30 iPHoP-RF;76.40
contig001341	vOTU000450	GB_GCA_900555465.1	d__Bacteria;p__Bacillota_A;c__Clostridia;o__Oscillospirales;f__Butyricicoccaceae;g__Agathobaculum;s__Agathobaculum intestinigallinarum	CRISPR	94.6	iPHoP-RF;78.00 blast;68.50
contig001341	vOTU000450	GB_GCA_019115425.1	d__Bacteria;p__Bacillota_A;c__Clostridia;o__Oscillospirales;f__Butyricicoccaceae;g__Agathobaculum;s__Agathobaculum merdigallinarum	iPHoP-RF	93.7	None
contig001341	vOTU000450	GB_GCA_019115185.1	d__Bacteria;p__Bacillota_A;c__Clostridia;o__Oscillospirales;f__Butyricicoccaceae;g__Agathobaculum;s__Agathobaculum merdipullorum	blast	91.7	iPHoP-RF;84.20
contig001341	vOTU000450	GB_GCA_944380975.1	d__Bacteria;p__Bacillota_A;c__Clostridia;o__Oscillospirales;f__Butyricicoccaceae;g__Agathobaculum;s__Agathobaculum sp944380975	blast	91.7	iPHoP-RF;83.90
contig001351	vOTU000452	MGYG000004078	d__Bacteria;p__Bacillota_A;c__Clostridia;o__TANB77;f__CAG-508;g__CAG-273;s__	CRISPR	94.8	blast;92.60 iPHoP-RF;59.50
contig001351	vOTU000452	GB_GCA_944391825.1	d__Bacteria;p__Bacillota_A;c__Clostridia;o__TANB77;f__CAG-508;g__CAG-273;s__CAG-273 sp944391825	CRISPR	94.1	None
contig001351	vOTU000452	GB_GCA_944390505.1	d__Bacteria;p__Bacillota_A;c__Clostridia;o__TANB77;f__CAG-508;g__CAG-273;s__CAG-273 sp944390505	blast	92.3	iPHoP-RF;66.50
contig001354	vOTU000454	GB_GCA_003458705.1	d__Bacteria;p__Bacillota_A;c__Clostridia;o__Lachnospirales;f__Lachnospiraceae;g__Lachnospira;s__Lachnospira sp003537285	CRISPR	98.9	iPHoP-RF;52.80
contig001354	vOTU000454	RS_GCF_000146185.1	d__Bacteria;p__Bacillota_A;c__Clostridia;o__Lachnospirales;f__Lachnospiraceae;g__Lachnospira;s__Lachnospira eligens	CRISPR	98.4	None
contig001354	vOTU000454	RS_GCF_009680455.1	d__Bacteria;p__Bacillota_A;c__Clostridia;o__Lachnospirales;f__Lachnospiraceae;g__Lachnospira;s__Lachnospira eligens_A	CRISPR	97.7	None
contig001355	vOTU000455	GB_GCA_018715465.1	d__Bacteria;p__Bacillota_A;c__Clostridia;o__Oscillospirales;f__Ruminococcaceae;g__Faecivivens;s__Faecivivens stercorigallinarum	blast	94.1	iPHoP-RF;67.50
contig001355	vOTU000455	GB_GCA_944386805.1	d__Bacteria;p__Bacillota_A;c__Clostridia;o__Oscillospirales;f__Ruminococcaceae;g__Faecivivens;s__Faecivivens sp944386805	blast	91.7	iPHoP-RF;57.30
contig001369	vOTU000458	RS_GCF_023336935.1	d__Bacteria;p__Bacillota_C;c__Negativicutes;o__Acidaminococcales;f__Acidaminococcaceae;g__CAG-266;s__CAG-266 sp000436095	blast	98.3	CRISPR;94.00 iPHoP-RF;83.60
contig001372	vOTU000461	RS_GCF_003481705.1	d__Bacteria;p__Bacillota_A;c__Clostridia;o__Oscillospirales;f__Butyricicoccaceae;g__Agathobaculum;s__Agathobaculum sp003481705	blast	95.9	iPHoP-RF;83.10
contig001372	vOTU000461	GB_GCA_003096535.1	d__Bacteria;p__Bacillota_A;c__Clostridia;o__Oscillospirales;f__Butyricicoccaceae;g__Agathobaculum;s__Agathobaculum butyriciproducens	blast	94.8	iPHoP-RF;84.80 CRISPR;63.30
contig001372	vOTU000461	GB_GCA_019115085.1	d__Bacteria;p__Bacillota_A;c__Clostridia;o__Oscillospirales;f__Butyricicoccaceae;g__Agathobaculum;s__Agathobaculum pullicola	iPHoP-RF	94.7	blast;89.30
contig001372	vOTU000461	GB_GCA_944384725.1	d__Bacteria;p__Bacillota_A;c__Clostridia;o__Oscillospirales;f__Butyricicoccaceae;g__Agathobaculum;s__Agathobaculum sp944384725	blast	93.7	iPHoP-RF;92.80
contig001372	vOTU000461	GB_GCA_019115185.1	d__Bacteria;p__Bacillota_A;c__Clostridia;o__Oscillospirales;f__Butyricicoccaceae;g__Agathobaculum;s__Agathobaculum merdipullorum	blast	93.2	iPHoP-RF;85.10
contig001372	vOTU000461	GB_GCA_944384695.1	d__Bacteria;p__Bacillota_A;c__Clostridia;o__Oscillospirales;f__Butyricicoccaceae;g__Agathobaculum;s__Agathobaculum sp944384695	blast	91.9	iPHoP-RF;86.00
contig001372	vOTU000461	GB_GCA_019418305.1	d__Bacteria;p__Bacillota_A;c__Clostridia;o__Oscillospirales;f__Butyricicoccaceae;g__Agathobaculum;s__Agathobaculum sp019418305	iPHoP-RF	91.1	None
contig001374	vOTU000462	GB_GCA_019113005.1	d__Bacteria;p__Bacillota_A;c__Clostridia;o__Oscillospirales;f__Butyricicoccaceae;g__Butyricicoccus;s__Butyricicoccus avistercoris	blast	93.7	None
contig001378	vOTU000463	GB_GCA_904419835.1	d__Bacteria;p__Bacillota_A;c__Clostridia;o__Oscillospirales;f__Oscillospiraceae;g__Pseudoflavonifractor;s__Pseudoflavonifractor sp904419835	CRISPR	96.6	iPHoP-RF;78.30
contig001378	vOTU000463	RS_GCF_000169255.2	d__Bacteria;p__Bacillota_A;c__Clostridia;o__Oscillospirales;f__Oscillospiraceae;g__Pseudoflavonifractor;s__Pseudoflavonifractor capillosus	CRISPR	93.7	iPHoP-RF;80.80
contig001378	vOTU000463	RS_GCF_002161085.1	d__Bacteria;p__Bacillota_A;c__Clostridia;o__Oscillospirales;f__Oscillospiraceae;g__Flavonifractor;s__Flavonifractor avicola	blast	92.2	iPHoP-RF;74.80
contig001379	vOTU000464	GB_GCA_930990065.1	d__Bacteria;p__Bacillota_A;c__Clostridia;o__Oscillospirales;f__Acutalibacteraceae;g__Heritagella;s__Heritagella caecorum	blast	93.9	iPHoP-RF;78.30
contig001379	vOTU000464	GB_GCA_904420555.1	d__Bacteria;p__Bacillota_A;c__Clostridia;o__Oscillospirales;f__Acutalibacteraceae;g__Heritagella;s__Heritagella intestinalis	blast	91.7	iPHoP-RF;64.80
contig001379	vOTU000464	GB_GCA_018710915.1	d__Bacteria;p__Bacillota_A;c__Clostridia;o__Oscillospirales;f__Acutalibacteraceae;g__Heritagella;s__Heritagella pullistercoris	blast	90.8	iPHoP-RF;60.10
contig001379	vOTU000464	GB_GCA_022767925.1	d__Bacteria;p__Bacillota_A;c__Clostridia;o__Oscillospirales;f__Acutalibacteraceae;g__Heritagella;s__Heritagella sp022767925	blast	90	iPHoP-RF;58.20
contig001379	vOTU000464	GB_GCA_944380795.1	d__Bacteria;p__Bacillota_A;c__Clostridia;o__Oscillospirales;f__Acutalibacteraceae;g__Heritagella;s__Heritagella sp944380795	blast	90	iPHoP-RF;58.20
contig001386	vOTU000467	RS_GCF_022809355.1	d__Bacteria;p__Bacteroidota;c__Bacteroidia;o__Bacteroidales;f__Tannerellaceae;g__Parabacteroides;s__Parabacteroides faecavium	blast	93.8	iPHoP-RF;89.80 CRISPR;88.70
contig001396	vOTU000472	GB_GCA_900545405.1	d__Bacteria;p__Bacillota_A;c__Clostridia;o__Oscillospirales;f__Oscillospiraceae;g__Scatomorpha;s__Scatomorpha sp900545405	blast	98.4	iPHoP-RF;77.80
contig001396	vOTU000472	GB_GCA_900544295.1	d__Bacteria;p__Bacillota_A;c__Clostridia;o__Oscillospirales;f__Oscillospiraceae;g__Scatomorpha;s__Scatomorpha intestinigallinarum	blast	96.8	iPHoP-RF;78.30
contig001396	vOTU000472	GB_GCA_944385815.1	d__Bacteria;p__Bacillota_A;c__Clostridia;o__Oscillospirales;f__Oscillospiraceae;g__Scatomorpha;s__Scatomorpha sp944385815	iPHoP-RF	95.1	None
contig001396	vOTU000472	GB_GCA_944385795.1	d__Bacteria;p__Bacillota_A;c__Clostridia;o__Oscillospirales;f__Oscillospiraceae;g__Scatomorpha;s__Scatomorpha sp944385795	iPHoP-RF	91.1	None
contig001397	vOTU000473	GB_GCA_905200545.1	d__Bacteria;p__Bacillota_A;c__Clostridia;o__Oscillospirales;f__Oscillospiraceae;g__Dysosmobacter;s__Dysosmobacter sp905200545	blast	96.3	iPHoP-RF;90.10
contig001397	vOTU000473	GB_GCA_900546705.1	d__Bacteria;p__Bacillota_A;c__Clostridia;o__Oscillospirales;f__Oscillospiraceae;g__Dysosmobacter;s__Dysosmobacter sp900546705	blast	91.7	iPHoP-RF;79.80
contig001416	vOTU000479	RS_GCF_900104605.1	d__Bacteria;p__Bacteroidota;c__Bacteroidia;o__Bacteroidales;f__Rikenellaceae;g__Tidjanibacter;s__Tidjanibacter inops	blast	92.8	iPHoP-RF;56.00
contig001416	vOTU000479	GB_GCA_019113395.1	d__Bacteria;p__Bacteroidota;c__Bacteroidia;o__Bacteroidales;f__Rikenellaceae;g__Rikenella;s__Rikenella faecigallinarum	blast	91.4	iPHoP-RF;84.50
contig001422	vOTU000481	GB_GCA_001915925.1	d__Bacteria;p__Bacillota_A;c__Clostridia;o__TANB77;f__CAG-508;g__Merdicola;s__Merdicola sp001915925	blast	96.8	CRISPR;90.60 iPHoP-RF;81.10
contig001422	vOTU000481	GB_GCA_900552655.1	d__Bacteria;p__Bacillota_A;c__Clostridia;o__TANB77;f__CAG-508;g__Merdicola;s__Merdicola sp900552655	blast	96.7	CRISPR;73.10
contig001422	vOTU000481	GB_GCA_944391965.1	d__Bacteria;p__Bacillota_A;c__Clostridia;o__TANB77;f__CAG-508;g__Merdicola;s__Merdicola sp944391965	blast	96.4	None
contig001422	vOTU000481	GB_GCA_930990555.1	d__Bacteria;p__Bacillota_A;c__Clostridia;o__TANB77;f__CAG-508;g__Merdicola;s__Merdicola sp930990555	blast	94.4	iPHoP-RF;71.10
contig001422	vOTU000481	GB_GCA_900553015.1	d__Bacteria;p__Bacillota_A;c__Clostridia;o__TANB77;f__CAG-508;g__Merdicola;s__Merdicola sp900553015	blast	92.1	iPHoP-RF;76.80
contig001432	vOTU000487	GB_GCA_019114345.1	d__Bacteria;p__Bacillota_A;c__Clostridia;o__Oscillospirales;f__Butyricicoccaceae;g__Agathobaculum;s__Agathobaculum pullistercoris	blast	95.7	iPHoP-RF;80.80
contig001432	vOTU000487	GB_GCA_019418305.1	d__Bacteria;p__Bacillota_A;c__Clostridia;o__Oscillospirales;f__Butyricicoccaceae;g__Agathobaculum;s__Agathobaculum sp019418305	iPHoP-RF	95.4	None
contig001432	vOTU000487	GB_GCA_019115085.1	d__Bacteria;p__Bacillota_A;c__Clostridia;o__Oscillospirales;f__Butyricicoccaceae;g__Agathobaculum;s__Agathobaculum pullicola	iPHoP-RF	94.1	blast;89.80
contig001432	vOTU000487	GB_GCA_019115185.1	d__Bacteria;p__Bacillota_A;c__Clostridia;o__Oscillospirales;f__Butyricicoccaceae;g__Agathobaculum;s__Agathobaculum merdipullorum	blast	93.6	iPHoP-RF;93.40
contig001432	vOTU000487	GB_GCA_944384725.1	d__Bacteria;p__Bacillota_A;c__Clostridia;o__Oscillospirales;f__Butyricicoccaceae;g__Agathobaculum;s__Agathobaculum sp944384725	iPHoP-RF	93.1	blast;90.30
contig001432	vOTU000487	GB_GCA_019421385.1	d__Bacteria;p__Bacillota_A;c__Clostridia;o__Oscillospirales;f__Butyricicoccaceae;g__Agathobaculum;s__Agathobaculum sp019421385	iPHoP-RF	92.8	blast;89.60
contig001432	vOTU000487	RS_GCF_000701665.1	d__Bacteria;p__Bacillota_A;c__Clostridia;o__Oscillospirales;f__Butyricicoccaceae;g__Agathobaculum;s__Agathobaculum desmolans	blast	92	iPHoP-RF;84.50
contig001432	vOTU000487	GB_GCA_944384695.1	d__Bacteria;p__Bacillota_A;c__Clostridia;o__Oscillospirales;f__Butyricicoccaceae;g__Agathobaculum;s__Agathobaculum sp944384695	blast	91	iPHoP-RF;90.50
contig001432	vOTU000487	GB_GCA_019117485.1	d__Bacteria;p__Bacillota_A;c__Clostridia;o__Oscillospirales;f__Butyricicoccaceae;g__Agathobaculum;s__Agathobaculum intestinipullorum	blast	90.5	iPHoP-RF;77.30
contig001432	vOTU000487	GB_GCA_944380975.1	d__Bacteria;p__Bacillota_A;c__Clostridia;o__Oscillospirales;f__Butyricicoccaceae;g__Agathobaculum;s__Agathobaculum sp944380975	blast	90.1	iPHoP-RF;88.20
contig001434	vOTU000489	GB_GCA_944391015.1	d__Bacteria;p__Bacillota_A;c__Clostridia;o__TANB77;f__CAG-508;g__CAG-273;s__CAG-273 sp944391015	blast	93.5	iPHoP-RF;56.20
contig001455	vOTU000500	GB_GCA_003534295.1	d__Bacteria;p__Bacillota_A;c__Clostridia;o__TANB77;f__CAG-508;g__CAG-273;s__CAG-273 sp003534295	blast	93.9	None
contig001455	vOTU000500	GB_GCA_944389655.1	d__Bacteria;p__Bacillota_A;c__Clostridia;o__TANB77;f__CAG-508;g__CAG-273;s__CAG-273 sp944389655	blast	91.8	None
contig001466	vOTU000502	RS_GCF_003149245.1	d__Bacteria;p__Bacillota_A;c__Clostridia;o__Lachnospirales;f__Lachnospiraceae;g__Muricomes;s__Muricomes oroticus	iPHoP-RF	95.4	None
contig001466	vOTU000502	RS_GCF_012524165.2	d__Bacteria;p__Bacillota_A;c__Clostridia;o__Lachnospirales;f__Lachnospiraceae;g__Muricomes;s__Muricomes faecalis	iPHoP-RF	95.4	None
contig001466	vOTU000502	RS_GCF_900142165.1	d__Bacteria;p__Bacillota_A;c__Clostridia;o__Lachnospirales;f__Lachnospiraceae;g__Hespellia;s__Hespellia stercorisuis	iPHoP-RF	95.1	None
contig001466	vOTU000502	GB_GCA_019418195.1	d__Bacteria;p__Bacillota_A;c__Clostridia;o__Lachnospirales;f__Lachnospiraceae;g__Mediterraneibacter;s__Mediterraneibacter sp019418195	blast	92.6	iPHoP-RF;69.30
contig001466	vOTU000502	MGYG000052100	d__Bacteria;p__Bacillota_A;c__Clostridia;o__Lachnospirales;f__Lachnospiraceae;g__Schaedlerella;s__	iPHoP-RF	92.1	None
contig001466	vOTU000502	GB_GCA_000509105.1	d__Bacteria;p__Bacillota_A;c__Clostridia;o__Lachnospirales;f__Lachnospiraceae;g__Muricomes;s__Muricomes sp000509105	iPHoP-RF	91.8	None
contig001466	vOTU000502	MGYG000052887	d__Bacteria;p__Bacillota_A;c__Clostridia;o__Lachnospirales;f__Lachnospiraceae;g__Schaedlerella;s__	iPHoP-RF	91.4	None
contig001466	vOTU000502	GB_GCA_019117305.1	d__Bacteria;p__Bacillota_A;c__Clostridia;o__Lachnospirales;f__Lachnospiraceae;g__Mediterraneibacter;s__Mediterraneibacter merdigallinarum	blast	91	iPHoP-RF;65.30
contig001466	vOTU000502	GB_GCA_944381125.1	d__Bacteria;p__Bacillota_A;c__Clostridia;o__Lachnospirales;f__Lachnospiraceae;g__Mediterraneibacter;s__Mediterraneibacter sp944381125	blast	90.6	iPHoP-RF;55.40
contig001466	vOTU000502	RS_GCF_002160525.1	d__Bacteria;p__Bacillota_A;c__Clostridia;o__Lachnospirales;f__Lachnospiraceae;g__Mediterraneibacter;s__Mediterraneibacter cottocaccae	blast	90.4	iPHoP-RF;68.90
contig001480	vOTU000510	GB_GCA_018648405.1	d__Bacteria;p__Planctomycetota;c__Brocadiia;o__Brocadiales;f__Scalinduaceae;g__Scalindua;s__Scalindua sp018648405	iPHoP-RF	92.8	None
contig001480	vOTU000510	GB_GCA_024654465.1	d__Bacteria;p__Planctomycetota;c__Brocadiia;o__Brocadiales;f__Scalinduaceae;g__Scalindua;s__Scalindua sp024654465	iPHoP-RF	92.4	None
contig001481	vOTU000511	RS_GCF_008831035.1	d__Bacteria;p__Actinomycetota;c__Coriobacteriia;o__Coriobacteriales;f__Eggerthellaceae;g__Ellagibacter;s__Ellagibacter isourolithinifaciens	blast	93.2	iPHoP-RF;70.20
contig001481	vOTU000511	RS_GCF_023276655.1	d__Bacteria;p__Actinomycetota;c__Coriobacteriia;o__Coriobacteriales;f__Atopobiaceae;g__Parafannyhessea;s__Parafannyhessea intestinalis	blast	90.3	iPHoP-RF;59.20
contig001486	vOTU000512	RS_GCF_002161085.1	d__Bacteria;p__Bacillota_A;c__Clostridia;o__Oscillospirales;f__Oscillospiraceae;g__Flavonifractor;s__Flavonifractor avicola	blast	93	iPHoP-RF;80.60
contig001486	vOTU000512	RS_GCF_002159265.1	d__Bacteria;p__Bacillota_A;c__Clostridia;o__Oscillospirales;f__Oscillospiraceae;g__Flavonifractor;s__Flavonifractor sp002159265	blast	91.4	iPHoP-RF;80.00
contig001487	vOTU000513	GB_GCA_018715465.1	d__Bacteria;p__Bacillota_A;c__Clostridia;o__Oscillospirales;f__Ruminococcaceae;g__Faecivivens;s__Faecivivens stercorigallinarum	blast	93.8	iPHoP-RF;86.30
contig001487	vOTU000513	GB_GCA_944386805.1	d__Bacteria;p__Bacillota_A;c__Clostridia;o__Oscillospirales;f__Ruminococcaceae;g__Faecivivens;s__Faecivivens sp944386805	blast	92.1	iPHoP-RF;87.30 CRISPR;54.00
contig001492	vOTU000515	GB_GCA_944322255.1	d__Archaea;p__Thermoplasmatota;c__Thermoplasmata;o__Methanomassiliicoccales;f__Methanomethylophilaceae;g__UBA71;s__UBA71 sp944322255	iPHoP-RF	93.4	blast;92.40
contig001492	vOTU000515	GB_GCA_016296195.1	d__Archaea;p__Thermoplasmatota;c__Thermoplasmata;o__Methanomassiliicoccales;f__Methanomethylophilaceae;g__UBA71;s__UBA71 sp016296195	iPHoP-RF	90.5	None
contig001492	vOTU000515	GB_GCA_017935945.1	d__Archaea;p__Thermoplasmatota;c__Thermoplasmata;o__Methanomassiliicoccales;f__Methanomethylophilaceae;g__UBA71;s__UBA71 sp017935945	iPHoP-RF	90.1	None
contig001492	vOTU000515	GB_GCA_945492685.1	d__Archaea;p__Thermoplasmatota;c__Thermoplasmata;o__Methanomassiliicoccales;f__Methanomethylophilaceae;g__UBA71;s__UBA71 sp945492685	iPHoP-RF	90.1	None
contig001499	vOTU000519	GB_GCA_900752335.1	d__Bacteria;p__Bacillota_A;c__Clostridia;o__TANB77;f__CAG-508;g__CAG-273;s__CAG-273 sp900752335	blast	93.9	iPHoP-RF;51.70
contig001499	vOTU000519	MGYG000314386	d__Bacteria;p__Bacillota_A;c__Clostridia;o__TANB77;f__CAG-508;g__CAG-273;s__	blast	93.9	iPHoP-RF;68.20
contig001499	vOTU000519	GB_GCA_944389655.1	d__Bacteria;p__Bacillota_A;c__Clostridia;o__TANB77;f__CAG-508;g__CAG-273;s__CAG-273 sp944389655	blast	92.2	iPHoP-RF;73.90
contig001499	vOTU000519	GB_GCA_944392505.1	d__Bacteria;p__Bacillota_A;c__Clostridia;o__TANB77;f__CAG-508;g__CAG-273;s__CAG-273 sp944392505	blast	91.7	iPHoP-RF;64.30
contig001499	vOTU000519	MGYG000315424	d__Bacteria;p__Bacillota_A;c__Clostridia;o__TANB77;f__CAG-508;g__CAG-273;s__	blast	90.3	iPHoP-RF;64.50
contig001504	vOTU000522	RS_GCF_019239235.1	d__Bacteria;p__Bacteroidota;c__Bacteroidia;o__Bacteroidales;f__Bacteroidaceae;g__Mediterranea;s__Mediterranea pullorum	blast	96.8	iPHoP-RF;84.80
contig001507	vOTU000523	RS_GCF_000239295.1	d__Bacteria;p__Bacillota_A;c__Clostridia;o__Oscillospirales;f__Oscillospiraceae;g__Flavonifractor;s__Flavonifractor plautii	blast	93.5	None
contig001507	vOTU000523	RS_GCF_000169255.2	d__Bacteria;p__Bacillota_A;c__Clostridia;o__Oscillospirales;f__Oscillospiraceae;g__Pseudoflavonifractor;s__Pseudoflavonifractor capillosus	blast	91.9	None
contig001526	vOTU000531	MGYG000314054	d__Bacteria;p__Bacillota_A;c__Clostridia;o__Lachnospirales;f__Lachnospiraceae;g__Mediterraneibacter;s__	blast	93.5	iPHoP-RF;78.00
contig001526	vOTU000531	GB_GCA_019119265.1	d__Bacteria;p__Bacillota_A;c__Clostridia;o__Lachnospirales;f__Lachnospiraceae;g__Mediterraneibacter;s__Mediterraneibacter intestinigallinarum	blast	92.7	iPHoP-RF;73.70
contig001526	vOTU000531	GB_GCA_019115385.1	d__Bacteria;p__Bacillota_A;c__Clostridia;o__Lachnospirales;f__Lachnospiraceae;g__Mediterraneibacter;s__Mediterraneibacter avicola	blast	92.4	iPHoP-RF;84.80
contig001526	vOTU000531	GB_GCA_019118885.1	d__Bacteria;p__Bacillota_A;c__Clostridia;o__Lachnospirales;f__Lachnospiraceae;g__Mediterraneibacter;s__Mediterraneibacter surreyensis	blast	92	iPHoP-RF;70.40
contig001526	vOTU000531	GB_GCA_019116885.1	d__Bacteria;p__Bacillota_A;c__Clostridia;o__Lachnospirales;f__Lachnospiraceae;g__Mediterraneibacter;s__Mediterraneibacter pullistercoris	blast	91.2	iPHoP-RF;65.30
contig001526	vOTU000531	RS_GCF_002161355.1	d__Bacteria;p__Bacillota_A;c__Clostridia;o__Lachnospirales;f__Lachnospiraceae;g__Mediterraneibacter;s__Mediterraneibacter caccavium	blast	90.1	iPHoP-RF;86.70 CRISPR;59.00
contig001553	vOTU000543	GB_GCA_900544445.1	d__Bacteria;p__Bacillota_A;c__Clostridia;o__Lachnospirales;f__Lachnospiraceae;g__Eisenbergiella;s__Eisenbergiella intestinigallinarum	blast	91.8	iPHoP-RF;67.50
contig001578	vOTU000551	GB_GCA_904419835.1	d__Bacteria;p__Bacillota_A;c__Clostridia;o__Oscillospirales;f__Oscillospiraceae;g__Pseudoflavonifractor;s__Pseudoflavonifractor sp904419835	CRISPR	97.6	iPHoP-RF;77.10
contig001578	vOTU000551	RS_GCF_016901735.1	d__Bacteria;p__Bacillota_A;c__Clostridia;o__Oscillospirales;f__Oscillospiraceae;g__Pseudoflavonifractor_A;s__Pseudoflavonifractor_A sp016901735	CRISPR	97.2	iPHoP-RF;74.10
contig001578	vOTU000551	RS_GCF_004154955.1	d__Bacteria;p__Bacillota_A;c__Clostridia;o__Oscillospirales;f__Oscillospiraceae;g__Intestinimonas;s__Intestinimonas butyriciproducens	blast	95.4	CRISPR;89.30 iPHoP-RF;84.50
contig001578	vOTU000551	RS_GCF_000239295.1	d__Bacteria;p__Bacillota_A;c__Clostridia;o__Oscillospirales;f__Oscillospiraceae;g__Flavonifractor;s__Flavonifractor plautii	CRISPR	92.8	iPHoP-RF;54.60
contig001578	vOTU000551	GB_GCA_900756495.1	d__Bacteria;p__Bacillota_A;c__Clostridia;o__Oscillospirales;f__Oscillospiraceae;g__HGM12998;s__HGM12998 sp900756495	blast	90.8	iPHoP-RF;82.50
contig001579	vOTU000552	GB_GCA_900538905.1	d__Bacteria;p__Pseudomonadota;c__Gammaproteobacteria;o__Burkholderiales;f__Burkholderiaceae_A;g__Duodenibacillus;s__Duodenibacillus intestinavium	CRISPR	97.1	iPHoP-RF;88.50
contig001579	vOTU000552	RS_GCF_003472385.1	d__Bacteria;p__Pseudomonadota;c__Gammaproteobacteria;o__Burkholderiales;f__Burkholderiaceae_A;g__Duodenibacillus;s__Duodenibacillus intestinigallinarum	CRISPR	96.5	iPHoP-RF;93.40
contig001593	vOTU000561	GB_GCA_900545405.1	d__Bacteria;p__Bacillota_A;c__Clostridia;o__Oscillospirales;f__Oscillospiraceae;g__Scatomorpha;s__Scatomorpha sp900545405	blast	96.9	iPHoP-RF;66.50
contig001593	vOTU000561	GB_GCA_900544295.1	d__Bacteria;p__Bacillota_A;c__Clostridia;o__Oscillospirales;f__Oscillospiraceae;g__Scatomorpha;s__Scatomorpha intestinigallinarum	blast	96.8	iPHoP-RF;74.30
contig001599	vOTU000566	GB_GCA_944320485.1	d__Archaea;p__Thermoplasmatota;c__Thermoplasmata;o__Methanomassiliicoccales;f__Methanomethylophilaceae;g__UBA71;s__UBA71 sp944320485	CRISPR	94.8	iPHoP-RF;93.70
contig001599	vOTU000566	GB_GCA_905187815.1	d__Archaea;p__Thermoplasmatota;c__Thermoplasmata;o__Methanomassiliicoccales;f__Methanomethylophilaceae;g__UBA71;s__UBA71 sp905187815	iPHoP-RF	90.1	CRISPR;87.50
contig001601	vOTU000568	GB_GCA_025151215.1	d__Bacteria;p__Bacteroidota;c__Bacteroidia;o__Bacteroidales;f__Tannerellaceae;g__Parabacteroides;s__Parabacteroides merdae	CRISPR	98.6	None
contig001601	vOTU000568	RS_GCF_000969835.1	d__Bacteria;p__Bacteroidota;c__Bacteroidia;o__Bacteroidales;f__Tannerellaceae;g__Parabacteroides;s__Parabacteroides goldsteinii	CRISPR	98.5	None
contig001601	vOTU000568	RS_GCF_000012845.1	d__Bacteria;p__Bacteroidota;c__Bacteroidia;o__Bacteroidales;f__Tannerellaceae;g__Parabacteroides;s__Parabacteroides distasonis	CRISPR	97.3	None
contig001601	vOTU000568	RS_GCF_004168205.1	d__Bacteria;p__Bacillota;c__Bacilli;o__Erysipelotrichales;f__Coprobacillaceae;g__Catenibacterium;s__Catenibacterium sp000437715	blast	96.6	iPHoP-RF;58.40
contig001607	vOTU000571	RS_GCF_900015215.1	d__Bacteria;p__Bacillota_A;c__Clostridia;o__Peptostreptococcales;f__Peptostreptococcaceae;g__Romboutsia;s__Romboutsia ilealis	iPHoP-RF	93.7	None
contig001607	vOTU000571	GB_GCA_902362365.1	d__Bacteria;p__Bacillota_A;c__Clostridia;o__Peptostreptococcales;f__Peptostreptococcaceae;g__GCA-900066495;s__GCA-900066495 sp902362365	iPHoP-RF	91.8	None
contig001607	vOTU000571	GB_GCA_000686145.1	d__Bacteria;p__Bacillota_A;c__Clostridia;o__Peptostreptococcales;f__Peptostreptococcaceae;g__Romboutsia_D;s__Romboutsia_D sp000686145	iPHoP-RF	90.5	None
contig001607	vOTU000571	GB_GCA_025148965.1	d__Bacteria;p__Bacillota_A;c__Clostridia;o__Peptostreptococcales;f__Peptostreptococcaceae;g__Intestinibacter;s__Intestinibacter bartlettii	iPHoP-RF	90.5	None
contig001607	vOTU000571	MGYG000299643	d__Bacteria;p__Bacillota_A;c__Clostridia;o__Peptostreptococcales;f__Peptostreptococcaceae;g__Romboutsia_D;s__	iPHoP-RF	90.5	None
contig001607	vOTU000571	MGYG000302071	d__Bacteria;p__Bacillota_A;c__Clostridia;o__Peptostreptococcales;f__Peptostreptococcaceae;g__Intestinibacter;s__	iPHoP-RF	90.5	None
contig001607	vOTU000571	RS_GCF_019916025.1	d__Bacteria;p__Bacillota_A;c__Clostridia;o__Peptostreptococcales;f__Peptostreptococcaceae;g__Paraclostridium;s__Paraclostridium bifermentans	iPHoP-RF	90.5	None
contig001612	vOTU000574	RS_GCF_002160765.1	d__Bacteria;p__Bacillota_A;c__Clostridia;o__Lachnospirales;f__Lachnospiraceae;g__Merdisoma;s__Merdisoma faecalis	blast	96.8	iPHoP-RF;78.00 CRISPR;56.50
contig001612	vOTU000574	GB_GCA_018715645.1	d__Bacteria;p__Bacillota_A;c__Clostridia;o__Lachnospirales;f__Lachnospiraceae;g__Merdisoma;s__Merdisoma merdipullorum	blast	91.8	iPHoP-RF;70.60
contig001625	vOTU000583	GB_GCA_944324735.1	d__Bacteria;p__Elusimicrobiota;c__Elusimicrobia;o__Elusimicrobiales;f__Elusimicrobiaceae;g__UBA1436;s__UBA1436 sp944324735	CRISPR	99.5	iPHoP-RF;96.40 blast;93.60
contig001625	vOTU000583	GB_GCA_900541355.1	d__Bacteria;p__Elusimicrobiota;c__Elusimicrobia;o__Elusimicrobiales;f__Elusimicrobiaceae;g__UBA1436;s__UBA1436 sp900541355	CRISPR	99.3	iPHoP-RF;92.40
contig001625	vOTU000583	GB_GCA_944324695.1	d__Bacteria;p__Elusimicrobiota;c__Elusimicrobia;o__Elusimicrobiales;f__Elusimicrobiaceae;g__Avelusimicrobium;s__Avelusimicrobium sp944324695	CRISPR	98.8	iPHoP-RF;87.30
contig001625	vOTU000583	GB_GCA_944324965.1	d__Bacteria;p__Elusimicrobiota;c__Elusimicrobia;o__Elusimicrobiales;f__Elusimicrobiaceae;g__UBA1436;s__UBA1436 sp944324965	CRISPR	98.8	iPHoP-RF;85.70
contig001625	vOTU000583	GB_GCA_934667625.1	d__Bacteria;p__Elusimicrobiota;c__Elusimicrobia;o__Elusimicrobiales;f__Elusimicrobiaceae;g__UBA1436;s__UBA1436 sp934667625	iPHoP-RF	96.1	None
contig001625	vOTU000583	GB_GCA_002329395.1	d__Bacteria;p__Elusimicrobiota;c__Elusimicrobia;o__Elusimicrobiales;f__Elusimicrobiaceae;g__UBA1436;s__UBA1436 sp002329395	iPHoP-RF	94.7	None
contig001625	vOTU000583	GB_GCA_944326765.1	d__Bacteria;p__Elusimicrobiota;c__Elusimicrobia;o__Elusimicrobiales;f__Elusimicrobiaceae;g__UBA1436;s__UBA1436 sp944326765	blast	94.7	iPHoP-RF;82.80
contig001625	vOTU000583	GB_GCA_944327085.1	d__Bacteria;p__Elusimicrobiota;c__Elusimicrobia;o__Elusimicrobiales;f__Elusimicrobiaceae;g__UBA1436;s__UBA1436 sp944327085	iPHoP-RF	94.4	None
contig001625	vOTU000583	GB_GCA_002432025.1	d__Bacteria;p__Elusimicrobiota;c__Elusimicrobia;o__Elusimicrobiales;f__Elusimicrobiaceae;g__UBA1436;s__UBA1436 sp002432025	iPHoP-RF	94.1	None
contig001625	vOTU000583	GB_GCA_944324095.1	d__Bacteria;p__Elusimicrobiota;c__Elusimicrobia;o__Elusimicrobiales;f__Elusimicrobiaceae;g__UBA1436;s__UBA1436 sp944324095	iPHoP-RF	93.4	None
contig001625	vOTU000583	RS_GCF_002159705.1	d__Bacteria;p__Elusimicrobiota;c__Elusimicrobia;o__Elusimicrobiales;f__Elusimicrobiaceae;g__UBA1436;s__UBA1436 sp002159705	iPHoP-RF	93.4	blast;93.40
contig001625	vOTU000583	GB_GCA_944324655.1	d__Bacteria;p__Elusimicrobiota;c__Elusimicrobia;o__Elusimicrobiales;f__Elusimicrobiaceae;g__UBA1436;s__UBA1436 sp944324655	iPHoP-RF	93.1	blast;92.80
contig001625	vOTU000583	GB_GCA_944325225.1	d__Bacteria;p__Elusimicrobiota;c__Elusimicrobia;o__Elusimicrobiales;f__Elusimicrobiaceae;g__UBA1436;s__UBA1436 sp944325225	blast	92.7	CRISPR;62.90 iPHoP-RF;62.50
contig001625	vOTU000583	GB_GCA_902767385.1	d__Bacteria;p__Elusimicrobiota;c__Elusimicrobia;o__Elusimicrobiales;f__Elusimicrobiaceae;g__UBA1436;s__UBA1436 sp902767385	iPHoP-RF	92.1	None
contig001625	vOTU000583	MGYG000290590	d__Bacteria;p__Elusimicrobiota;c__Elusimicrobia;o__Elusimicrobiales;f__Elusimicrobiaceae;g__UBA1436;s__	iPHoP-RF	90.5	None
contig001625	vOTU000583	GB_GCA_017961295.1	d__Bacteria;p__Elusimicrobiota;c__Elusimicrobia;o__Elusimicrobiales;f__Elusimicrobiaceae;g__UBA1436;s__UBA1436 sp017961295	iPHoP-RF	90.1	None
contig001625	vOTU000583	GB_GCA_900319325.1	d__Bacteria;p__Elusimicrobiota;c__Elusimicrobia;o__Elusimicrobiales;f__Elusimicrobiaceae;g__UBA1436;s__UBA1436 sp900319325	iPHoP-RF	90.1	None
contig001629	vOTU000585	GB_GCA_000437855.1	d__Bacteria;p__Bacillota_A;c__Clostridia;o__TANB77;f__CAG-508;g__CAG-273;s__CAG-273 sp000437855	blast	92.3	None
contig001632	vOTU000587	GB_GCA_930990125.1	d__Bacteria;p__Bacillota_A;c__Clostridia;o__TANB77;f__CAG-508;g__CAKNOI01;s__CAKNOI01 sp930990125	blast	93.5	None
contig001632	vOTU000587	GB_GCA_944387555.1	d__Bacteria;p__Bacillota_A;c__Clostridia;o__TANB77;f__CAG-508;g__CAG-269;s__CAG-269 sp944387555	blast	91.8	None
contig001636	vOTU000588	GB_GCA_944325195.1	d__Bacteria;p__Desulfobacterota;c__Desulfovibrionia;o__Desulfovibrionales;f__Desulfovibrionaceae;g__RGIG1962;s__RGIG1962 sp944325195	blast	92.6	iPHoP-RF;50.40
contig001637	vOTU000589	GB_GCA_004000625.1	d__Bacteria;p__Bacillota_A;c__Clostridia;o__Oscillospirales;f__Ruminococcaceae;g__Gemmiger;s__Gemmiger qucibialis	CRISPR	98	iPHoP-RF;67.00
contig001637	vOTU000589	RS_GCF_016900095.1	d__Bacteria;p__Bacillota_A;c__Clostridia;o__Oscillospirales;f__Ruminococcaceae;g__Gemmiger;s__Gemmiger formicilis_A	CRISPR	97.8	None
contig001637	vOTU000589	RS_GCF_900167555.1	d__Bacteria;p__Bacillota_A;c__Clostridia;o__Oscillospirales;f__Ruminococcaceae;g__Gemmiger;s__Gemmiger formicilis	CRISPR	96.7	iPHoP-RF;72.20
contig001641	vOTU000592	GB_GCA_022846095.1	d__Bacteria;p__Bacillota_A;c__Clostridia;o__Oscillospirales;f__Oscillospiraceae;g__UMGS1202;s__UMGS1202 sp900549565	blast	94.4	iPHoP-RF;70.40
contig001641	vOTU000592	GB_GCA_900754605.1	d__Bacteria;p__Bacillota_A;c__Clostridia;o__Oscillospirales;f__Oscillospiraceae;g__Lawsonibacter;s__Lawsonibacter sp900754605	blast	91.6	None
contig001641	vOTU000592	GB_GCA_003573975.1	d__Bacteria;p__Bacillota_A;c__Clostridia;o__Oscillospirales;f__Oscillospiraceae;g__Lawsonibacter;s__Lawsonibacter sp900066825	blast	91.5	iPHoP-RF;55.20
contig001641	vOTU000592	RS_GCF_002159455.1	d__Bacteria;p__Bacillota_A;c__Clostridia;o__Oscillospirales;f__Oscillospiraceae;g__Flavonifractor;s__Flavonifractor sp002159455	blast	91	iPHoP-RF;59.20
contig001641	vOTU000592	RS_GCF_000239295.1	d__Bacteria;p__Bacillota_A;c__Clostridia;o__Oscillospirales;f__Oscillospiraceae;g__Flavonifractor;s__Flavonifractor plautii	blast	90.6	iPHoP-RF;64.50
contig001646	vOTU000594	GB_GCA_019119675.1	d__Bacteria;p__Bacillota_A;c__Clostridia;o__Lachnospirales;f__Lachnospiraceae;g__Mediterraneibacter;s__Mediterraneibacter faecipullorum	blast	96.4	iPHoP-RF;87.60
contig001646	vOTU000594	MGYG000314054	d__Bacteria;p__Bacillota_A;c__Clostridia;o__Lachnospirales;f__Lachnospiraceae;g__Mediterraneibacter;s__	blast	96.3	iPHoP-RF;83.10
contig001646	vOTU000594	MGYG000309908	d__Bacteria;p__Bacillota_A;c__Clostridia;o__Lachnospirales;f__Lachnospiraceae;g__Mediterraneibacter;s__	blast	94.3	iPHoP-RF;84.20
contig001646	vOTU000594	GB_GCA_019418195.1	d__Bacteria;p__Bacillota_A;c__Clostridia;o__Lachnospirales;f__Lachnospiraceae;g__Mediterraneibacter;s__Mediterraneibacter sp019418195	blast	93.3	CRISPR;89.70 iPHoP-RF;78.70
contig001646	vOTU000594	GB_GCA_019119745.1	d__Bacteria;p__Bacillota_A;c__Clostridia;o__Lachnospirales;f__Lachnospiraceae;g__Mediterraneibacter;s__Mediterraneibacter gallistercoris	blast	91.3	iPHoP-RF;78.30
contig001646	vOTU000594	GB_GCA_900553885.1	d__Bacteria;p__Bacillota_A;c__Clostridia;o__Lachnospirales;f__Lachnospiraceae;g__Mediterraneibacter;s__Mediterraneibacter sp900553885	CRISPR	91.1	iPHoP-RF;79.80
contig001649	vOTU000595	GB_GCA_022846095.1	d__Bacteria;p__Bacillota_A;c__Clostridia;o__Oscillospirales;f__Oscillospiraceae;g__UMGS1202;s__UMGS1202 sp900549565	blast	93.9	iPHoP-RF;66.80
contig001649	vOTU000595	GB_GCA_003573975.1	d__Bacteria;p__Bacillota_A;c__Clostridia;o__Oscillospirales;f__Oscillospiraceae;g__Lawsonibacter;s__Lawsonibacter sp900066825	blast	90.4	None
contig001669	vOTU000605	GB_GCA_019120615.1	d__Bacteria;p__Bacillota_A;c__Clostridia;o__Lachnospirales;f__Lachnospiraceae;g__Mediterraneibacter;s__Mediterraneibacter norfolkensis	blast	91.8	iPHoP-RF;56.20
contig001669	vOTU000605	GB_GCA_944377745.1	d__Bacteria;p__Bacillota_A;c__Clostridia;o__Lachnospirales;f__Lachnospiraceae;g__Mediterraneibacter;s__Mediterraneibacter sp944377745	blast	91.8	iPHoP-RF;57.60
contig001669	vOTU000605	GB_GCA_019120075.1	d__Bacteria;p__Bacillota_A;c__Clostridia;o__Lachnospirales;f__Lachnospiraceae;g__Mediterraneibacter;s__Mediterraneibacter excrementigallinarum	blast	91.4	iPHoP-RF;66.30
contig001673	vOTU000608	GB_GCA_900548505.1	d__Bacteria;p__Bacillota_A;c__Clostridia;o__Oscillospirales;f__Oscillospiraceae;g__Dysosmobacter;s__Dysosmobacter sp900548505	blast	93.8	iPHoP-RF;80.00
contig001673	vOTU000608	GB_GCA_900546705.1	d__Bacteria;p__Bacillota_A;c__Clostridia;o__Oscillospirales;f__Oscillospiraceae;g__Dysosmobacter;s__Dysosmobacter sp900546705	blast	92.1	iPHoP-RF;83.10
contig001673	vOTU000608	GB_GCA_019418625.1	d__Bacteria;p__Bacillota_A;c__Clostridia;o__Oscillospirales;f__Oscillospiraceae;g__Dysosmobacter;s__Dysosmobacter sp019418625	blast	92	iPHoP-RF;79.30
contig001684	vOTU000613	GB_GCA_905200545.1	d__Bacteria;p__Bacillota_A;c__Clostridia;o__Oscillospirales;f__Oscillospiraceae;g__Dysosmobacter;s__Dysosmobacter sp905200545	blast	96.5	iPHoP-RF;76.80
contig001684	vOTU000613	MGYG000003910	d__Bacteria;p__Bacillota_A;c__Clostridia;o__Oscillospirales;f__Oscillospiraceae;g__Dysosmobacter;s__	blast	93.9	iPHoP-RF;70.60
contig001684	vOTU000613	GB_GCA_000436875.1	d__Bacteria;p__Bacillota_A;c__Clostridia;o__Oscillospirales;f__Oscillospiraceae;g__Dysosmobacter;s__Dysosmobacter sp000436875	blast	91.4	iPHoP-RF;67.50
contig001684	vOTU000613	GB_GCA_944387035.1	d__Bacteria;p__Bacillota_A;c__Clostridia;o__Oscillospirales;f__Oscillospiraceae;g__Dysosmobacter;s__Dysosmobacter sp944387035	blast	91.1	iPHoP-RF;73.70
contig001684	vOTU000613	GB_GCA_944387015.1	d__Bacteria;p__Bacillota_A;c__Clostridia;o__Oscillospirales;f__Oscillospiraceae;g__Dysosmobacter;s__Dysosmobacter sp944387015	blast	90.7	iPHoP-RF;70.90
contig001699	vOTU000621	GB_GCA_900762575.1	d__Bacteria;p__Bacillota;c__Bacilli;o__RFN20;f__CAG-631;g__Caccosoma;s__Caccosoma sp900762575	blast	93.9	None
contig001699	vOTU000621	GB_GCA_000433015.1	d__Bacteria;p__Bacillota;c__Bacilli;o__RFN20;f__CAG-631;g__Caccosoma;s__Caccosoma faecigallinarum	blast	91.5	None
contig001707	vOTU000624	GB_GCA_944385095.1	d__Bacteria;p__Bacillota_A;c__Clostridia;o__Oscillospirales;f__Oscillospiraceae;g__Lawsonibacter;s__Lawsonibacter sp944385095	blast	96.3	iPHoP-RF;61.40
contig001707	vOTU000624	GB_GCA_944383165.1	d__Bacteria;p__Bacillota_A;c__Clostridia;o__Oscillospirales;f__Oscillospiraceae;g__Lawsonibacter;s__Lawsonibacter sp944383165	blast	96.1	iPHoP-RF;59.80
contig001713	vOTU000627	GB_GCA_900112995.1	d__Bacteria;p__Bacillota_A;c__Clostridia;o__Lachnospirales;f__Lachnospiraceae;g__Lachnospira;s__Lachnospira rogosae	blast	96.1	iPHoP-RF;73.50
contig001714	vOTU000628	GB_GCA_934168205.1	d__Bacteria;p__Bacillota;c__Bacilli;o__RF39;f__UBA660;g__CAG-877;s__CAG-877 sp934168205	blast	94.6	iPHoP-RF;66.00
contig001725	vOTU000632	RS_GCF_020687245.1	d__Bacteria;p__Bacillota_A;c__Clostridia;o__Oscillospirales;f__Ruminococcaceae;g__Faecalibacterium;s__Faecalibacterium longum	blast	95.1	iPHoP-RF;57.30
contig001725	vOTU000632	GB_GCA_000432135.1	d__Bacteria;p__Bacillota_A;c__Clostridia;o__Oscillospirales;f__Oscillospiraceae;g__CAG-170;s__CAG-170 sp000432135	blast	90.9	None
contig001725	vOTU000632	RS_GCF_010509575.1	d__Bacteria;p__Bacillota_A;c__Clostridia;o__Oscillospirales;f__Ruminococcaceae;g__Faecalibacterium;s__Faecalibacterium duncaniae	blast	90.9	iPHoP-RF;55.20
contig001730	vOTU000634	GB_GCA_944407095.1	d__Bacteria;p__Pseudomonadota;c__Alphaproteobacteria;o__Rs-D84;f__Rs-D84;g__Enterousia;s__Enterousia intestinigallinarum	blast	92.1	iPHoP-RF;54.90
contig001732	vOTU000635	GB_GCA_900550445.1	d__Bacteria;p__Pseudomonadota;c__Alphaproteobacteria;o__RF32;f__CAG-977;g__UBA11549;s__UBA11549 sp900550445	CRISPR	93.7	iPHoP-RF;74.30
contig001736	vOTU000638	GB_GCA_900552925.1	d__Bacteria;p__Bacillota_A;c__Clostridia;o__Oscillospirales;f__Acutalibacteraceae;g__UBA1417;s__UBA1417 sp900552925	blast	92	iPHoP-RF;61.70
contig001736	vOTU000638	GB_GCA_002305575.1	d__Bacteria;p__Bacillota_A;c__Clostridia;o__Oscillospirales;f__Acutalibacteraceae;g__UBA1417;s__UBA1417 sp002305575	blast	90.2	iPHoP-RF;60.30
contig001743	vOTU000642	GB_GCA_019119435.1	d__Bacteria;p__Bacillota_A;c__Clostridia;o__Oscillospirales;f__Butyricicoccaceae;g__Butyricicoccus;s__Butyricicoccus avicola	CRISPR	96.1	iPHoP-RF;85.10
contig001745	vOTU000644	RS_GCF_009193295.2	d__Bacteria;p__Bacteroidota;c__Bacteroidia;o__Bacteroidales;f__Bacteroidaceae;g__Bacteroides;s__Bacteroides luhongzhouii	iPHoP-RF	97.1	None
contig001745	vOTU000644	RS_GCF_000614145.1	d__Bacteria;p__Bacteroidota;c__Bacteroidia;o__Bacteroidales;f__Bacteroidaceae;g__Bacteroides;s__Bacteroides faecichinchillae	iPHoP-RF	96.7	None
contig001745	vOTU000644	RS_GCF_003865075.1	d__Bacteria;p__Bacteroidota;c__Bacteroidia;o__Bacteroidales;f__Bacteroidaceae;g__Bacteroides;s__Bacteroides faecalis	iPHoP-RF	96.7	None
contig001745	vOTU000644	GB_GCA_002307035.1	d__Bacteria;p__Bacteroidota;c__Bacteroidia;o__Bacteroidales;f__Bacteroidaceae;g__Bacteroides_I;s__Bacteroides_I sp002307035	iPHoP-RF	96.4	None
contig001745	vOTU000644	GB_GCA_014385165.1	d__Bacteria;p__Bacteroidota;c__Bacteroidia;o__Bacteroidales;f__Bacteroidaceae;g__Bacteroides;s__Bacteroides sp014385165	iPHoP-RF	96.4	None
contig001745	vOTU000644	GB_GCA_019416685.1	d__Bacteria;p__Bacteroidota;c__Bacteroidia;o__Bacteroidales;f__Bacteroidaceae;g__Bacteroides;s__Bacteroides sp900762525	iPHoP-RF	96.4	None
contig001745	vOTU000644	RS_GCF_001314995.1	d__Bacteria;p__Bacteroidota;c__Bacteroidia;o__Bacteroidales;f__Bacteroidaceae;g__Bacteroides;s__Bacteroides ovatus	iPHoP-RF	96.4	None
contig001745	vOTU000644	RS_GCF_014334015.1	d__Bacteria;p__Bacteroidota;c__Bacteroidia;o__Bacteroidales;f__Bacteroidaceae;g__Bacteroides;s__Bacteroides intestinigallinarum	iPHoP-RF	96.4	None
contig001745	vOTU000644	RS_GCF_903181435.1	d__Bacteria;p__Bacteroidota;c__Bacteroidia;o__Bacteroidales;f__Bacteroidaceae;g__Bacteroides;s__Bacteroides sp900765785	iPHoP-RF	96.4	None
contig001745	vOTU000644	RS_GCF_000210075.1	d__Bacteria;p__Bacteroidota;c__Bacteroidia;o__Bacteroidales;f__Bacteroidaceae;g__Bacteroides;s__Bacteroides xylanisolvens	iPHoP-RF	96.1	None
contig001745	vOTU000644	RS_GCF_003464595.1	d__Bacteria;p__Bacteroidota;c__Bacteroidia;o__Bacteroidales;f__Bacteroidaceae;g__Bacteroides;s__Bacteroides intestinalis_A	iPHoP-RF	96.1	None
contig001745	vOTU000644	MGYG000065103	d__Bacteria;p__Bacteroidota;c__Bacteroidia;o__Bacteroidales;f__Bacteroidaceae;g__Bacteroides;s__	iPHoP-RF	95.4	None
contig001745	vOTU000644	RS_GCF_000156195.1	d__Bacteria;p__Bacteroidota;c__Bacteroidia;o__Bacteroidales;f__Bacteroidaceae;g__Bacteroides;s__Bacteroides finegoldii	iPHoP-RF	95.4	None
contig001745	vOTU000644	RS_GCF_001688725.2	d__Bacteria;p__Bacteroidota;c__Bacteroidia;o__Bacteroidales;f__Bacteroidaceae;g__Bacteroides;s__Bacteroides caecimuris	iPHoP-RF	95.4	None
contig001745	vOTU000644	RS_GCF_902364365.1	d__Bacteria;p__Bacteroidota;c__Bacteroidia;o__Bacteroidales;f__Bacteroidaceae;g__Bacteroides;s__Bacteroides sp900556215	iPHoP-RF	95.4	None
contig001745	vOTU000644	RS_GCF_019583405.1	d__Bacteria;p__Bacteroidota;c__Bacteroidia;o__Bacteroidales;f__Bacteroidaceae;g__Bacteroides;s__Bacteroides fragilis_B	iPHoP-RF	94.7	None
contig001745	vOTU000644	GB_GCA_905207245.1	d__Bacteria;p__Bacteroidota;c__Bacteroidia;o__Bacteroidales;f__Bacteroidaceae;g__Bacteroides;s__Bacteroides sp905207245	iPHoP-RF	94.4	None
contig001745	vOTU000644	RS_GCF_900142015.1	d__Bacteria;p__Bacteroidota;c__Bacteroidia;o__Bacteroidales;f__Bacteroidaceae;g__Bacteroides;s__Bacteroides stercorirosoris	iPHoP-RF	94.1	None
contig001745	vOTU000644	RS_GCF_900128475.1	d__Bacteria;p__Bacteroidota;c__Bacteroidia;o__Bacteroidales;f__Bacteroidaceae;g__Mediterranea;s__Mediterranea massiliensis	iPHoP-RF	93.7	blast;93.60
contig001745	vOTU000644	MGYG000282907	d__Bacteria;p__Bacteroidota;c__Bacteroidia;o__Bacteroidales;f__Bacteroidaceae;g__Bacteroides;s__	iPHoP-RF	93.1	None
contig001745	vOTU000644	RS_GCF_000158035.1	d__Bacteria;p__Bacteroidota;c__Bacteroidia;o__Bacteroidales;f__Bacteroidaceae;g__Bacteroides;s__Bacteroides cellulosilyticus	iPHoP-RF	93.1	None
contig001745	vOTU000644	RS_GCF_000513195.1	d__Bacteria;p__Bacteroidota;c__Bacteroidia;o__Bacteroidales;f__Bacteroidaceae;g__Bacteroides;s__Bacteroides timonensis	iPHoP-RF	93.1	None
contig001745	vOTU000644	RS_GCF_000157915.1	d__Bacteria;p__Bacteroidota;c__Bacteroidia;o__Bacteroidales;f__Bacteroidaceae;g__Phocaeicola;s__Phocaeicola coprophilus	blast	92.7	iPHoP-RF;76.40
contig001745	vOTU000644	GB_GCA_000613465.1	d__Bacteria;p__Bacteroidota;c__Bacteroidia;o__Bacteroidales;f__Bacteroidaceae;g__Bacteroides;s__Bacteroides nordii	iPHoP-RF	92.1	None
contig001745	vOTU000644	RS_GCF_000187895.1	d__Bacteria;p__Bacteroidota;c__Bacteroidia;o__Bacteroidales;f__Bacteroidaceae;g__Phocaeicola;s__Phocaeicola plebeius	blast	91.7	iPHoP-RF;70.00
contig001745	vOTU000644	GB_GCA_900553815.1	d__Bacteria;p__Bacteroidota;c__Bacteroidia;o__Bacteroidales;f__Bacteroidaceae;g__Mediterranea;s__Mediterranea sp900553815	CRISPR	91.5	iPHoP-RF;85.70
contig001745	vOTU000644	GB_GCA_900557355.1	d__Bacteria;p__Bacteroidota;c__Bacteroidia;o__Bacteroidales;f__Bacteroidaceae;g__Bacteroides;s__Bacteroides sp900557355	iPHoP-RF	91.4	None
contig001745	vOTU000644	RS_GCF_900155865.1	d__Bacteria;p__Bacteroidota;c__Bacteroidia;o__Bacteroidales;f__Bacteroidaceae;g__Bacteroides;s__Bacteroides bouchesdurhonensis	iPHoP-RF	91.1	None
contig001745	vOTU000644	GB_GCA_023426145.1	d__Bacteria;p__Bacteroidota;c__Bacteroidia;o__Bacteroidales;f__Bacteroidaceae;g__Bacteroides;s__Bacteroides sp023426145	iPHoP-RF	90.8	None
contig001745	vOTU000644	GB_GCA_025147485.1	d__Bacteria;p__Bacteroidota;c__Bacteroidia;o__Bacteroidales;f__Bacteroidaceae;g__Bacteroides;s__Bacteroides uniformis	iPHoP-RF	90.5	CRISPR;89.20
contig001745	vOTU000644	RS_GCF_004793475.1	d__Bacteria;p__Bacteroidota;c__Bacteroidia;o__Bacteroidales;f__Bacteroidaceae;g__Bacteroides;s__Bacteroides sp002491635	iPHoP-RF	90.5	None
contig001745	vOTU000644	MGYG000165276	d__Bacteria;p__Bacteroidota;c__Bacteroidia;o__Bacteroidales;f__Bacteroidaceae;g__Bacteroides;s__	iPHoP-RF	90.1	None
contig001745	vOTU000644	RS_GCF_000614125.1	d__Bacteria;p__Bacteroidota;c__Bacteroidia;o__Bacteroidales;f__Bacteroidaceae;g__Bacteroides;s__Bacteroides rodentium	iPHoP-RF	90.1	None
contig001751	vOTU000649	RS_GCF_023744375.1	d__Bacteria;p__Bacteroidota;c__Bacteroidia;o__Bacteroidales;f__Tannerellaceae;g__Parabacteroides;s__Parabacteroides sp900548175	CRISPR	99.3	iPHoP-RF;97.10 blast;96.50
contig001751	vOTU000649	RS_GCF_022809355.1	d__Bacteria;p__Bacteroidota;c__Bacteroidia;o__Bacteroidales;f__Tannerellaceae;g__Parabacteroides;s__Parabacteroides faecavium	CRISPR	99.2	blast;96.80 iPHoP-RF;96.70
contig001751	vOTU000649	GB_GCA_018054455.1	d__Bacteria;p__Bacteroidota;c__Bacteroidia;o__Bacteroidales;f__Tannerellaceae;g__Macellibacteroides;s__Macellibacteroides sp018054455	iPHoP-RF	97.1	None
contig001751	vOTU000649	GB_GCA_002381645.1	d__Bacteria;p__Bacteroidota;c__Bacteroidia;o__Bacteroidales;f__Tannerellaceae;g__DFXE01;s__DFXE01 sp002381645	iPHoP-RF	96.7	None
contig001751	vOTU000649	GB_GCA_021203545.1	d__Bacteria;p__Bacteroidota;c__Bacteroidia;o__Bacteroidales;f__Tannerellaceae;g__UBA4116;s__UBA4116 sp021203545	iPHoP-RF	96.7	None
contig001751	vOTU000649	RS_GCF_013409575.1	d__Bacteria;p__Bacteroidota;c__Bacteroidia;o__Bacteroidales;f__Tannerellaceae;g__Macellibacteroides;s__Macellibacteroides fermentans	iPHoP-RF	96.7	None
contig001751	vOTU000649	MGYG000164138	d__Bacteria;p__Bacteroidota;c__Bacteroidia;o__Bacteroidales;f__Tannerellaceae;g__Parabacteroides;s__	blast	96.5	iPHoP-RF;96.40
contig001751	vOTU000649	GB_GCA_020860805.1	d__Bacteria;p__Bacteroidota;c__Bacteroidia;o__Bacteroidales;f__Tannerellaceae;g__UBA4116;s__UBA4116 sp020860805	iPHoP-RF	96.4	None
contig001751	vOTU000649	3300000059_9	d__Bacteria;p__Bacteroidota;c__Bacteroidia;o__Bacteroidales;f__Tannerellaceae;g__Massilibacteroides;s__	iPHoP-RF	95.4	None
contig001751	vOTU000649	3300011586_1	d__Bacteria;p__Bacteroidota;c__Bacteroidia;o__Bacteroidales;f__Tannerellaceae;g__DFXE01;s__	iPHoP-RF	95.4	None
contig001751	vOTU000649	GB_GCA_021204405.1	d__Bacteria;p__Bacteroidota;c__Bacteroidia;o__Bacteroidales;f__Tannerellaceae;g__JAJPZJ01;s__JAJPZJ01 sp021204405	iPHoP-RF	95.4	None
contig001751	vOTU000649	RS_GCF_900178525.1	d__Bacteria;p__Bacteroidota;c__Bacteroidia;o__Bacteroidales;f__Tannerellaceae;g__Massilibacteroides;s__Massilibacteroides vaginae	iPHoP-RF	95.4	None
contig001751	vOTU000649	RS_GCF_900162725.1	d__Bacteria;p__Bacteroidota;c__Bacteroidia;o__Bacteroidales;f__Tannerellaceae;g__Marseille-P3160;s__Marseille-P3160 sp900162725	iPHoP-RF	95.1	None
contig001751	vOTU000649	GB_GCA_023429375.1	d__Bacteria;p__Bacteroidota;c__Bacteroidia;o__Bacteroidales;f__Tannerellaceae;g__Massilibacteroides;s__Massilibacteroides sp023429375	iPHoP-RF	94.4	None
contig001751	vOTU000649	3300011852_3	d__Bacteria;p__Bacteroidota;c__Bacteroidia;o__Bacteroidales;f__Tannerellaceae;g__Barb7;s__	iPHoP-RF	94.1	None
contig001751	vOTU000649	RS_GCF_900292045.1	d__Bacteria;p__Bacteroidota;c__Bacteroidia;o__Bacteroidales;f__Tannerellaceae;g__Parabacteroides_B;s__Parabacteroides_B pacaensis	iPHoP-RF	93.1	None
contig001751	vOTU000649	RS_GCF_010500925.1	d__Bacteria;p__Bacteroidota;c__Bacteroidia;o__Bacteroidales;f__Tannerellaceae;g__Barb7;s__Barb7 sp010500925	iPHoP-RF	92.1	None
contig001751	vOTU000649	RS_GCF_003363715.1	d__Bacteria;p__Bacteroidota;c__Bacteroidia;o__Bacteroidales;f__Tannerellaceae;g__Parabacteroides;s__Parabacteroides acidifaciens	iPHoP-RF	90.5	None
contig001751	vOTU000649	GB_GCA_900552465.1	d__Bacteria;p__Bacteroidota;c__Bacteroidia;o__Bacteroidales;f__Tannerellaceae;g__Parabacteroides;s__Parabacteroides sp900552465	iPHoP-RF	90.1	None
contig001763	vOTU000653	GB_GCA_944384295.1	d__Bacteria;p__Bacillota_A;c__Clostridia;o__Lachnospirales;f__Anaerotignaceae;g__Anaerotignum;s__Anaerotignum sp944384295	blast	95	iPHoP-RF;83.10
contig001778	vOTU000658	GB_GCA_934167305.1	d__Bacteria;p__Bacillota_A;c__Clostridia;o__TANB77;f__CAG-508;g__CAG-273;s__CAG-273 sp934167305	CRISPR	92.4	iPHoP-RF;64.00
contig001779	vOTU013344	GB_GCA_900543805.1	d__Bacteria;p__Pseudomonadota;c__Gammaproteobacteria;o__Burkholderiales;f__Burkholderiaceae_A;g__Sutterella;s__Sutterella merdavium	blast	91.8	iPHoP-RF;80.80 CRISPR;66.50
contig001781	vOTU000659	RS_GCF_009696065.1	d__Bacteria;p__Bacillota_A;c__Clostridia;o__Lachnospirales;f__Lachnospiraceae;g__Oliverpabstia;s__Oliverpabstia intestinalis	blast	91.7	iPHoP-RF;55.70
contig001795	vOTU000666	GB_GCA_017888105.1	d__Bacteria;p__Bacillota;c__Bacilli;o__RF39;f__UBA660;g__Caccenecus;s__Caccenecus sp017888105	blast	94.5	iPHoP-RF;66.30
contig001795	vOTU000666	GB_GCA_944327365.1	d__Bacteria;p__Bacillota;c__Bacilli;o__RF39;f__UBA660;g__Caccenecus;s__Caccenecus sp944327365	blast	90.9	iPHoP-RF;88.20
contig001795	vOTU000666	GB_GCA_944358135.1	d__Bacteria;p__Bacillota;c__Bacilli;o__RF39;f__UBA660;g__Caccenecus;s__Caccenecus sp944358135	blast	90.7	iPHoP-RF;61.90
contig001795	vOTU000666	GB_GCA_900758895.1	d__Bacteria;p__Bacillota;c__Bacilli;o__RF39;f__UBA660;g__Caccenecus;s__Caccenecus sp900758895	blast	90.5	iPHoP-RF;53.30
contig001810	vOTU000670	GB_GCA_944389785.1	d__Bacteria;p__Pseudomonadota;c__Gammaproteobacteria;o__Enterobacterales_A;f__Succinivibrionaceae;g__CALXNP01;s__CALXNP01 sp944389785	blast	93.3	iPHoP-RF;77.80
contig001817	vOTU000672	GB_GCA_944387725.1	d__Bacteria;p__Bacillota_A;c__Clostridia;o__Oscillospirales;f__Oscillospiraceae;g__Intestinimonas;s__Intestinimonas sp944387725	blast	92.9	iPHoP-RF;86.70
contig001817	vOTU000672	GB_GCA_019115785.1	d__Bacteria;p__Bacillota_A;c__Clostridia;o__Oscillospirales;f__Oscillospiraceae;g__Intestinimonas;s__Intestinimonas merdavium	blast	91.8	iPHoP-RF;87.00
contig001817	vOTU000672	RS_GCF_002161215.1	d__Bacteria;p__Bacillota_A;c__Clostridia;o__Oscillospirales;f__Oscillospiraceae;g__Flavonifractor;s__Flavonifractor avistercoris	CRISPR	91.8	iPHoP-RF;86.00
contig001817	vOTU000672	RS_GCF_001244995.1	d__Bacteria;p__Bacillota_A;c__Clostridia;o__Oscillospirales;f__Oscillospiraceae;g__Intestinimonas;s__Intestinimonas massiliensis	iPHoP-RF	90.8	None
contig001834	vOTU000680	RS_GCF_000156195.1	d__Bacteria;p__Bacteroidota;c__Bacteroidia;o__Bacteroidales;f__Bacteroidaceae;g__Bacteroides;s__Bacteroides finegoldii	iPHoP-RF	97.1	None
contig001834	vOTU000680	RS_GCF_024623065.1	d__Bacteria;p__Bacteroidota;c__Bacteroidia;o__Bacteroidales;f__Bacteroidaceae;g__Bacteroides;s__Bacteroides acidifaciens	iPHoP-RF	96.7	None
contig001834	vOTU000680	RS_GCF_019239235.1	d__Bacteria;p__Bacteroidota;c__Bacteroidia;o__Bacteroidales;f__Bacteroidaceae;g__Mediterranea;s__Mediterranea pullorum	blast	96.5	iPHoP-RF;85.10
contig001834	vOTU000680	RS_GCF_900128475.1	d__Bacteria;p__Bacteroidota;c__Bacteroidia;o__Bacteroidales;f__Bacteroidaceae;g__Mediterranea;s__Mediterranea massiliensis	blast	96.5	iPHoP-RF;81.40
contig001834	vOTU000680	RS_GCF_001688725.2	d__Bacteria;p__Bacteroidota;c__Bacteroidia;o__Bacteroidales;f__Bacteroidaceae;g__Bacteroides;s__Bacteroides caecimuris	iPHoP-RF	96.4	None
contig001834	vOTU000680	RS_GCF_000011065.1	d__Bacteria;p__Bacteroidota;c__Bacteroidia;o__Bacteroidales;f__Bacteroidaceae;g__Bacteroides;s__Bacteroides thetaiotaomicron	iPHoP-RF	95.1	CRISPR;94.60
contig001834	vOTU000680	RS_GCF_000157915.1	d__Bacteria;p__Bacteroidota;c__Bacteroidia;o__Bacteroidales;f__Bacteroidaceae;g__Phocaeicola;s__Phocaeicola coprophilus	CRISPR	94.1	None
contig001834	vOTU000680	GB_GCA_900551645.1	d__Bacteria;p__Bacteroidota;c__Bacteroidia;o__Bacteroidales;f__Bacteroidaceae;g__Phocaeicola;s__Phocaeicola sp900551645	CRISPR	92.6	None
contig001834	vOTU000680	GB_GCA_945641355.1	d__Bacteria;p__Bacteroidota;c__Bacteroidia;o__Bacteroidales;f__Bacteroidaceae;g__Mediterranea;s__Mediterranea sp945641355	iPHoP-RF	92.4	None
contig001841	vOTU000684	RS_GCF_002222615.2	d__Bacteria;p__Bacteroidota;c__Bacteroidia;o__Bacteroidales;f__Bacteroidaceae;g__Bacteroides;s__Bacteroides caccae	CRISPR	97.6	iPHoP-RF;66.50
contig001841	vOTU000684	RS_GCF_900108345.1	d__Bacteria;p__Bacteroidota;c__Bacteroidia;o__Bacteroidales;f__Bacteroidaceae;g__Mediterranea;s__Mediterranea ndongoniae	CRISPR	94.4	iPHoP-RF;77.80
contig001841	vOTU000684	GB_GCA_025147485.1	d__Bacteria;p__Bacteroidota;c__Bacteroidia;o__Bacteroidales;f__Bacteroidaceae;g__Bacteroides;s__Bacteroides uniformis	CRISPR	94.3	iPHoP-RF;73.90
contig001841	vOTU000684	RS_GCF_010669225.1	d__Bacteria;p__Bacillota_C;c__Negativicutes;o__Selenomonadales;f__Selenomonadaceae;g__Megamonas;s__Megamonas funiformis	blast	92.1	None
contig001849	vOTU000686	GB_GCA_944381545.1	d__Bacteria;p__Bacillota_A;c__Clostridia;o__Lachnospirales;f__Lachnospiraceae;g__Acetatifactor;s__Acetatifactor sp944381545	blast	93.1	None
contig001858	vOTU000689	GB_GCA_944390505.1	d__Bacteria;p__Bacillota_A;c__Clostridia;o__TANB77;f__CAG-508;g__CAG-273;s__CAG-273 sp944390505	blast	93	iPHoP-RF;72.80
contig001861	vOTU000691	GB_GCA_004555915.1	d__Bacteria;p__Bacillota_A;c__Clostridia;o__Oscillospirales;f__Butyricicoccaceae;g__Butyricicoccus_A;s__Butyricicoccus_A sp004555915	iPHoP-RF	93.7	None
contig001861	vOTU000691	GB_GCA_944384655.1	d__Bacteria;p__Bacillota_A;c__Clostridia;o__Oscillospirales;f__Butyricicoccaceae;g__Butyricicoccus_A;s__Butyricicoccus_A sp944384655	blast	92.4	iPHoP-RF;85.70
contig001861	vOTU000691	RS_GCF_002157465.1	d__Bacteria;p__Bacillota_A;c__Clostridia;o__Oscillospirales;f__Butyricicoccaceae;g__Butyricicoccus_A;s__Butyricicoccus_A porcorum	blast	91.5	iPHoP-RF;86.30
contig001861	vOTU000691	GB_GCA_934532985.1	d__Bacteria;p__Bacillota_A;c__Clostridia;o__Oscillospirales;f__Butyricicoccaceae;g__Butyricicoccus_A;s__Butyricicoccus_A sp934532985	iPHoP-RF	90.5	None
contig001861	vOTU000691	GB_GCA_016293155.1	d__Bacteria;p__Bacillota_A;c__Clostridia;o__Oscillospirales;f__Butyricicoccaceae;g__JAEDEU01;s__JAEDEU01 sp016293155	iPHoP-RF	90.1	None
contig001865	vOTU000692	GB_GCA_019114345.1	d__Bacteria;p__Bacillota_A;c__Clostridia;o__Oscillospirales;f__Butyricicoccaceae;g__Agathobaculum;s__Agathobaculum pullistercoris	CRISPR	98.9	iPHoP-RF;62.70
contig001865	vOTU000692	GB_GCA_900557315.1	d__Bacteria;p__Bacillota_A;c__Clostridia;o__Oscillospirales;f__Butyricicoccaceae;g__Agathobaculum;s__Agathobaculum sp900557315	CRISPR	98.9	iPHoP-RF;69.10
contig001865	vOTU000692	GB_GCA_019113065.1	d__Bacteria;p__Bacillota_A;c__Clostridia;o__Oscillospirales;f__Butyricicoccaceae;g__Agathobaculum;s__Agathobaculum stercoravium	CRISPR	98.8	iPHoP-RF;77.30
contig001865	vOTU000692	GB_GCA_900555465.1	d__Bacteria;p__Bacillota_A;c__Clostridia;o__Oscillospirales;f__Butyricicoccaceae;g__Agathobaculum;s__Agathobaculum intestinigallinarum	CRISPR	98.3	iPHoP-RF;73.50
contig001866	vOTU000693	RS_GCF_023921805.1	d__Bacteria;p__Bacillota_A;c__Clostridia;o__Oscillospirales;f__Acutalibacteraceae;g__Ruminococcus_E;s__Ruminococcus_E sp003526955	CRISPR	98.5	None
contig001866	vOTU000693	RS_GCF_002834225.1	d__Bacteria;p__Bacillota_A;c__Clostridia;o__Oscillospirales;f__Acutalibacteraceae;g__Ruminococcus_E;s__Ruminococcus_E bromii	CRISPR	98.4	None
contig001866	vOTU000693	GB_GCA_905215855.1	d__Bacteria;p__Bacillota_A;c__Clostridia;o__Oscillospirales;f__Acutalibacteraceae;g__Ruminococcus_E;s__Ruminococcus_E sp905215855	CRISPR	97.4	None
contig001866	vOTU000693	RS_GCF_003438075.1	d__Bacteria;p__Bacillota_A;c__Clostridia;o__Oscillospirales;f__Acutalibacteraceae;g__Ruminococcus_E;s__Ruminococcus_E sp003438075	CRISPR	97	None
contig001866	vOTU000693	GB_GCA_900101355.1	d__Bacteria;p__Bacillota_A;c__Clostridia;o__Oscillospirales;f__Acutalibacteraceae;g__Ruminococcus_E;s__Ruminococcus_E bromii_A	CRISPR	93.1	None
contig001887	vOTU000698	GB_GCA_900758895.1	d__Bacteria;p__Bacillota;c__Bacilli;o__RF39;f__UBA660;g__Caccenecus;s__Caccenecus sp900758895	blast	92.1	iPHoP-RF;72.60
contig001887	vOTU000698	GB_GCA_944327365.1	d__Bacteria;p__Bacillota;c__Bacilli;o__RF39;f__UBA660;g__Caccenecus;s__Caccenecus sp944327365	blast	91.8	None
contig001891	vOTU000699	RS_GCF_016900655.1	d__Bacteria;p__Bacillota_A;c__Clostridia;o__Lachnospirales;f__Lachnospiraceae;g__Sellimonas;s__Sellimonas avistercoris	blast	92	None
contig001891	vOTU000699	GB_GCA_016899975.1	d__Bacteria;p__Bacillota_A;c__Clostridia;o__Lachnospirales;f__Lachnospiraceae;g__Fusicatenibacter;s__Fusicatenibacter sp900543115	blast	90.6	iPHoP-RF;56.80
contig001902	vOTU000703	GB_GCA_944350285.1	d__Bacteria;p__Bacillota;c__Bacilli;o__RF39;f__UBA660;g__Ventrenecus;s__Ventrenecus sp944350285	CRISPR	98.6	iPHoP-RF;51.20
contig001902	vOTU000703	GB_GCA_944381145.1	d__Bacteria;p__Bacillota_A;c__Clostridia;o__Christensenellales;f__UBA1242;g__UBA11490;s__UBA11490 sp944381145	blast	90	None
contig001910	vOTU000706	GB_GCA_902362595.1	d__Bacteria;p__Bacteroidota;c__Bacteroidia;o__Bacteroidales;f__Bacteroidaceae;g__Phocaeicola;s__Phocaeicola merdigallinarum	CRISPR	96.5	iPHoP-RF;60.60
contig001910	vOTU000706	RS_GCF_009193295.2	d__Bacteria;p__Bacteroidota;c__Bacteroidia;o__Bacteroidales;f__Bacteroidaceae;g__Bacteroides;s__Bacteroides luhongzhouii	iPHoP-RF	95.4	None
contig001910	vOTU000706	GB_GCA_900755095.1	d__Bacteria;p__Bacteroidota;c__Bacteroidia;o__Bacteroidales;f__Bacteroidaceae;g__Bacteroides;s__Bacteroides sp900755095	iPHoP-RF	94.7	None
contig001910	vOTU000706	RS_GCF_900142015.1	d__Bacteria;p__Bacteroidota;c__Bacteroidia;o__Bacteroidales;f__Bacteroidaceae;g__Bacteroides;s__Bacteroides stercorirosoris	iPHoP-RF	94.7	None
contig001910	vOTU000706	RS_GCF_003437535.1	d__Bacteria;p__Bacteroidota;c__Bacteroidia;o__Bacteroidales;f__Bacteroidaceae;g__Phocaeicola;s__Phocaeicola plebeius_A	CRISPR	94.6	blast;91.10 iPHoP-RF;84.20
contig001910	vOTU000706	GB_GCA_905215555.1	d__Bacteria;p__Bacteroidota;c__Bacteroidia;o__Bacteroidales;f__Bacteroidaceae;g__Bacteroides;s__Bacteroides sp905215555	iPHoP-RF	94.4	None
contig001910	vOTU000706	RS_GCF_000011065.1	d__Bacteria;p__Bacteroidota;c__Bacteroidia;o__Bacteroidales;f__Bacteroidaceae;g__Bacteroides;s__Bacteroides thetaiotaomicron	iPHoP-RF	94.1	None
contig001910	vOTU000706	RS_GCF_900106755.1	d__Bacteria;p__Bacteroidota;c__Bacteroidia;o__Bacteroidales;f__Bacteroidaceae;g__Bacteroides;s__Bacteroides faecis	iPHoP-RF	94.1	None
contig001910	vOTU000706	RS_GCF_002222615.2	d__Bacteria;p__Bacteroidota;c__Bacteroidia;o__Bacteroidales;f__Bacteroidaceae;g__Bacteroides;s__Bacteroides caccae	iPHoP-RF	93.4	None
contig001910	vOTU000706	RS_GCF_903181435.1	d__Bacteria;p__Bacteroidota;c__Bacteroidia;o__Bacteroidales;f__Bacteroidaceae;g__Bacteroides;s__Bacteroides sp900765785	iPHoP-RF	93.4	None
contig001910	vOTU000706	RS_GCF_001688725.2	d__Bacteria;p__Bacteroidota;c__Bacteroidia;o__Bacteroidales;f__Bacteroidaceae;g__Bacteroides;s__Bacteroides caecimuris	iPHoP-RF	93.1	None
contig001910	vOTU000706	RS_GCF_024623065.1	d__Bacteria;p__Bacteroidota;c__Bacteroidia;o__Bacteroidales;f__Bacteroidaceae;g__Bacteroides;s__Bacteroides acidifaciens	iPHoP-RF	93.1	None
contig001910	vOTU000706	RS_GCF_900155865.1	d__Bacteria;p__Bacteroidota;c__Bacteroidia;o__Bacteroidales;f__Bacteroidaceae;g__Bacteroides;s__Bacteroides bouchesdurhonensis	iPHoP-RF	92.8	None
contig001910	vOTU000706	MGYG000004003	d__Bacteria;p__Bacteroidota;c__Bacteroidia;o__Bacteroidales;f__Bacteroidaceae;g__Bacteroides;s__	iPHoP-RF	92.4	None
contig001910	vOTU000706	MGYG000075951	d__Bacteria;p__Bacteroidota;c__Bacteroidia;o__Bacteroidales;f__Bacteroidaceae;g__Bacteroides;s__	iPHoP-RF	92.4	None
contig001910	vOTU000706	RS_GCF_003865075.1	d__Bacteria;p__Bacteroidota;c__Bacteroidia;o__Bacteroidales;f__Bacteroidaceae;g__Bacteroides;s__Bacteroides faecalis	iPHoP-RF	91.8	None
contig001910	vOTU000706	RS_GCF_014334015.1	d__Bacteria;p__Bacteroidota;c__Bacteroidia;o__Bacteroidales;f__Bacteroidaceae;g__Bacteroides;s__Bacteroides intestinigallinarum	iPHoP-RF	91.4	None
contig001910	vOTU000706	RS_GCF_000187895.1	d__Bacteria;p__Bacteroidota;c__Bacteroidia;o__Bacteroidales;f__Bacteroidaceae;g__Phocaeicola;s__Phocaeicola plebeius	blast	91.2	iPHoP-RF;86.30
contig001910	vOTU000706	GB_GCA_902362375.1	d__Bacteria;p__Bacteroidota;c__Bacteroidia;o__Bacteroidales;f__Bacteroidaceae;g__Bacteroides;s__Bacteroides sp902362375	iPHoP-RF	91.1	None
contig001910	vOTU000706	RS_GCF_001275135.1	d__Bacteria;p__Bacteroidota;c__Bacteroidia;o__Bacteroidales;f__Bacteroidaceae;g__Prevotella;s__Prevotella rara	blast	90.9	None
contig001910	vOTU000706	GB_GCA_905207245.1	d__Bacteria;p__Bacteroidota;c__Bacteroidia;o__Bacteroidales;f__Bacteroidaceae;g__Bacteroides;s__Bacteroides sp905207245	iPHoP-RF	90.8	None
contig001910	vOTU000706	RS_GCF_001314995.1	d__Bacteria;p__Bacteroidota;c__Bacteroidia;o__Bacteroidales;f__Bacteroidaceae;g__Bacteroides;s__Bacteroides ovatus	iPHoP-RF	90.8	None
contig001910	vOTU000706	GB_GCA_019412865.1	d__Bacteria;p__Bacteroidota;c__Bacteroidia;o__Bacteroidales;f__Bacteroidaceae;g__Bacteroides;s__Bacteroides sp019412865	iPHoP-RF	90.5	None
contig001912	vOTU000707	GB_GCA_905187815.1	d__Archaea;p__Thermoplasmatota;c__Thermoplasmata;o__Methanomassiliicoccales;f__Methanomethylophilaceae;g__UBA71;s__UBA71 sp905187815	CRISPR	98.5	iPHoP-RF;70.40
contig001912	vOTU000707	MGYG000025383	d__Archaea;p__Thermoplasmatota;c__Thermoplasmata;o__Methanomassiliicoccales;f__Methanomethylophilaceae;g__UBA71;s__	iPHoP-RF	91.4	None
contig001912	vOTU000707	MGYG000238411	d__Archaea;p__Thermoplasmatota;c__Thermoplasmata;o__Methanomassiliicoccales;f__Methanomethylophilaceae;g__UBA71;s__	iPHoP-RF	91.4	None
contig001912	vOTU000707	GB_GCA_016284295.1	d__Archaea;p__Thermoplasmatota;c__Thermoplasmata;o__Methanomassiliicoccales;f__Methanomethylophilaceae;g__UBA71;s__UBA71 sp016284295	iPHoP-RF	91.1	None
contig001912	vOTU000707	GB_GCA_017468935.1	d__Archaea;p__Thermoplasmatota;c__Thermoplasmata;o__Methanomassiliicoccales;f__Methanomethylophilaceae;g__UBA71;s__UBA71 sp017468935	iPHoP-RF	90.8	None
contig001949	vOTU000717	GB_GCA_000431795.1	d__Bacteria;p__Bacillota;c__Bacilli;o__RF39;f__UBA660;g__CAG-302;s__CAG-302 sp000431795	blast	95.9	None
contig001949	vOTU000717	RS_GCF_010669225.1	d__Bacteria;p__Bacillota_C;c__Negativicutes;o__Selenomonadales;f__Selenomonadaceae;g__Megamonas;s__Megamonas funiformis	blast	95.7	None
contig001949	vOTU000717	GB_GCA_934162325.1	d__Bacteria;p__Bacillota;c__Bacilli;o__RF39;f__UBA660;g__CAG-302;s__CAG-302 sp934162325	blast	92.7	None
contig001962	vOTU000722	GB_GCA_900768915.1	d__Bacteria;p__Cyanobacteriota;c__Vampirovibrionia;o__Gastranaerophilales;f__Gastranaerophilaceae;g__UBA2883;s__UBA2883 sp900768915	blast	93	None
contig001962	vOTU000722	GB_GCA_022782605.1	d__Bacteria;p__Bacillota_A;c__Clostridia;o__Peptostreptococcales;f__Peptostreptococcaceae;g__Terrisporobacter;s__Terrisporobacter sp022782605	blast	92.1	None
contig001979	vOTU000725	MGYG000309552	d__Bacteria;p__Bacillota_A;c__Clostridia;o__Christensenellales;f__UBA1242;g__Caccovivens;s__	CRISPR	98.1	iPHoP-RF;66.30
contig001979	vOTU000725	GB_GCA_944383405.1	d__Bacteria;p__Bacillota_A;c__Clostridia;o__Christensenellales;f__UBA1242;g__UBA7862;s__UBA7862 sp944383405	blast	92.7	iPHoP-RF;56.00
contig001982	vOTU000727	GB_GCA_944372725.1	d__Bacteria;p__Bacillota;c__Bacilli;o__RF39;f__UBA660;g__Caccenecus;s__Caccenecus sp944372725	blast	91	None
contig001982	vOTU000727	GB_GCA_944393135.1	d__Bacteria;p__Bacillota_A;c__Clostridia;o__TANB77;f__CAG-508;g__CAG-269;s__CAG-269 sp944393135	blast	90.9	None
contig001990	vOTU000731	GB_GCA_944376945.1	d__Bacteria;p__Bacillota_A;c__Clostridia;o__Lachnospirales;f__Lachnospiraceae;g__Pseudolachnospira;s__Pseudolachnospira sp944376945	blast	93.9	iPHoP-RF;58.40
contig001993	vOTU000732	GB_GCA_944322255.1	d__Archaea;p__Thermoplasmatota;c__Thermoplasmata;o__Methanomassiliicoccales;f__Methanomethylophilaceae;g__UBA71;s__UBA71 sp944322255	blast	93.2	iPHoP-RF;81.60
contig002000	vOTU000735	GB_GCA_944386195.1	d__Bacteria;p__Bacillota_A;c__Clostridia;o__TANB77;f__CAG-508;g__CAG-269;s__CAG-269 sp944386195	blast	92.1	iPHoP-RF;70.20
contig002000	vOTU000735	GB_GCA_000438355.1	d__Bacteria;p__Bacillota_A;c__Clostridia;o__TANB77;f__CAG-508;g__CAG-273;s__CAG-273 sp000438355	blast	91	None
contig002000	vOTU000735	GB_GCA_944387525.1	d__Bacteria;p__Bacillota_A;c__Clostridia;o__TANB77;f__CAG-508;g__CAG-269;s__CAG-269 sp944387525	blast	91	iPHoP-RF;73.00
contig002000	vOTU000735	GB_GCA_944390505.1	d__Bacteria;p__Bacillota_A;c__Clostridia;o__TANB77;f__CAG-508;g__CAG-273;s__CAG-273 sp944390505	blast	90.6	None
contig002000	vOTU000735	GB_GCA_944391015.1	d__Bacteria;p__Bacillota_A;c__Clostridia;o__TANB77;f__CAG-508;g__CAG-273;s__CAG-273 sp944391015	blast	90.1	None
contig002013	vOTU000741	GB_GCA_019115385.1	d__Bacteria;p__Bacillota_A;c__Clostridia;o__Lachnospirales;f__Lachnospiraceae;g__Mediterraneibacter;s__Mediterraneibacter avicola	CRISPR	97.1	iPHoP-RF;77.80
contig002013	vOTU000741	GB_GCA_904419285.1	d__Bacteria;p__Bacillota_A;c__Clostridia;o__Lachnospirales;f__Lachnospiraceae;g__Mediterraneibacter;s__Mediterraneibacter caccogallinarum	CRISPR	95.9	iPHoP-RF;84.80
contig002013	vOTU000741	GB_GCA_019120075.1	d__Bacteria;p__Bacillota_A;c__Clostridia;o__Lachnospirales;f__Lachnospiraceae;g__Mediterraneibacter;s__Mediterraneibacter excrementigallinarum	CRISPR	93.1	blast;90.00 iPHoP-RF;79.30
contig002013	vOTU000741	GB_GCA_900761655.1	d__Bacteria;p__Bacillota_A;c__Clostridia;o__Lachnospirales;f__Lachnospiraceae;g__Mediterraneibacter;s__Mediterraneibacter sp900761655	blast	92.7	iPHoP-RF;78.00
contig002013	vOTU000741	RS_GCF_000153925.1	d__Bacteria;p__Bacillota_A;c__Clostridia;o__Lachnospirales;f__Lachnospiraceae;g__Mediterraneibacter;s__Mediterraneibacter torques	blast	91.3	iPHoP-RF;81.10
contig002013	vOTU000741	GB_GCA_019118665.1	d__Bacteria;p__Bacillota_A;c__Clostridia;o__Lachnospirales;f__Lachnospiraceae;g__Mediterraneibacter;s__Mediterraneibacter intestinipullorum	blast	90.9	iPHoP-RF;83.10
contig002013	vOTU000741	GB_GCA_944383695.1	d__Bacteria;p__Bacillota_A;c__Clostridia;o__Lachnospirales;f__Lachnospiraceae;g__Mediterraneibacter;s__Mediterraneibacter sp944383695	blast	90.9	iPHoP-RF;88.20
contig002013	vOTU000741	RS_GCF_002160525.1	d__Bacteria;p__Bacillota_A;c__Clostridia;o__Lachnospirales;f__Lachnospiraceae;g__Mediterraneibacter;s__Mediterraneibacter cottocaccae	blast	90.8	iPHoP-RF;80.60
contig002013	vOTU000741	GB_GCA_019116885.1	d__Bacteria;p__Bacillota_A;c__Clostridia;o__Lachnospirales;f__Lachnospiraceae;g__Mediterraneibacter;s__Mediterraneibacter pullistercoris	blast	90.6	iPHoP-RF;73.90
contig002013	vOTU000741	GB_GCA_944381935.1	d__Bacteria;p__Bacillota_A;c__Clostridia;o__Lachnospirales;f__Lachnospiraceae;g__Mediterraneibacter;s__Mediterraneibacter sp944381935	blast	90.6	iPHoP-RF;73.20
contig002013	vOTU000741	GB_GCA_944376685.1	d__Bacteria;p__Bacillota_A;c__Clostridia;o__Lachnospirales;f__Lachnospiraceae;g__Mediterraneibacter;s__Mediterraneibacter sp944376685	blast	90.5	iPHoP-RF;76.80
contig002013	vOTU000741	GB_GCA_019116185.1	d__Bacteria;p__Bacillota_A;c__Clostridia;o__Lachnospirales;f__Lachnospiraceae;g__Mediterraneibacter;s__Mediterraneibacter stercorigallinarum	blast	90.3	iPHoP-RF;83.90
contig002013	vOTU000741	GB_GCA_019117305.1	d__Bacteria;p__Bacillota_A;c__Clostridia;o__Lachnospirales;f__Lachnospiraceae;g__Mediterraneibacter;s__Mediterraneibacter merdigallinarum	blast	90.3	iPHoP-RF;76.80
contig002024	vOTU000744	GB_GCA_000435755.1	d__Bacteria;p__Bacillota_A;c__Clostridia;o__TANB77;f__CAG-508;g__CAG-273;s__CAG-273 sp000435755	blast	95.1	None
contig002024	vOTU000744	GB_GCA_900751815.1	d__Bacteria;p__Bacillota;c__Bacilli;o__RF39;f__UBA660;g__Onthocola_B;s__Onthocola_B stercorigallinarum	blast	91.8	None
contig002064	vOTU000753	GB_GCA_944392805.1	d__Bacteria;p__Bacillota_A;c__Clostridia;o__TANB77;f__CAG-508;g__CAG-269;s__CAG-269 sp944392805	blast	91.4	None
contig002097	vOTU000759	RS_GCF_900120155.1	d__Bacteria;p__Bacillota_A;c__Clostridia;o__Lachnospirales;f__Lachnospiraceae;g__Mediterraneibacter;s__Mediterraneibacter sp900120155	blast	93.9	iPHoP-RF;78.70
contig002097	vOTU000759	GB_GCA_902406105.1	d__Bacteria;p__Bacillota_A;c__Clostridia;o__Lachnospirales;f__Lachnospiraceae;g__Massilistercora;s__Massilistercora sp902406105	blast	92	None
contig002098	vOTU000760	GB_GCA_944329365.1	d__Bacteria;p__Bacillota;c__Bacilli;o__RF39;f__UBA660;g__Coprosoma;s__Coprosoma sp944329365	CRISPR	97.6	iPHoP-RF;71.50
contig002098	vOTU000760	GB_GCA_018713045.1	d__Bacteria;p__Bacillota;c__Bacilli;o__RF39;f__UBA660;g__Coprosoma;s__Coprosoma intestinipullorum	CRISPR	97.4	blast;76.90 iPHoP-RF;74.60
contig002101	vOTU000762	RS_GCF_010669225.1	d__Bacteria;p__Bacillota_C;c__Negativicutes;o__Selenomonadales;f__Selenomonadaceae;g__Megamonas;s__Megamonas funiformis	blast	96.8	None
contig002103	vOTU001023	GB_GCA_000432735.1	d__Bacteria;p__Bacteroidota;c__Bacteroidia;o__Bacteroidales;f__Bacteroidaceae;g__Phocaeicola;s__Phocaeicola sp000432735	CRISPR	98.8	iPHoP-RF;95.10 blast;88.10
contig002103	vOTU001023	RS_GCF_000187895.1	d__Bacteria;p__Bacteroidota;c__Bacteroidia;o__Bacteroidales;f__Bacteroidaceae;g__Phocaeicola;s__Phocaeicola plebeius	CRISPR	98.8	blast;96.80 iPHoP-RF;95.70
contig002103	vOTU001023	RS_GCF_003437535.1	d__Bacteria;p__Bacteroidota;c__Bacteroidia;o__Bacteroidales;f__Bacteroidaceae;g__Phocaeicola;s__Phocaeicola plebeius_A	CRISPR	98.8	blast;96.90 iPHoP-RF;96.40
contig002103	vOTU001023	RS_GCF_016900355.1	d__Bacteria;p__Bacteroidota;c__Bacteroidia;o__Bacteroidales;f__Bacteroidaceae;g__Phocaeicola;s__Phocaeicola sp900551065	CRISPR	98.8	blast;96.40 iPHoP-RF;93.70
contig002103	vOTU001023	GB_GCA_902362595.1	d__Bacteria;p__Bacteroidota;c__Bacteroidia;o__Bacteroidales;f__Bacteroidaceae;g__Phocaeicola;s__Phocaeicola merdigallinarum	CRISPR	98.7	iPHoP-RF;95.40 blast;90.00
contig002103	vOTU001023	RS_GCF_000157915.1	d__Bacteria;p__Bacteroidota;c__Bacteroidia;o__Bacteroidales;f__Bacteroidaceae;g__Phocaeicola;s__Phocaeicola coprophilus	CRISPR	98.2	iPHoP-RF;77.80 blast;56.00
contig002103	vOTU001023	RS_GCF_016901995.1	d__Bacteria;p__Bacteroidota;c__Bacteroidia;o__Bacteroidales;f__Bacteroidaceae;g__Phocaeicola;s__Phocaeicola sp900066445	CRISPR	97.9	iPHoP-RF;71.30 blast;58.60
contig002103	vOTU001023	RS_GCF_000154845.1	d__Bacteria;p__Bacteroidota;c__Bacteroidia;o__Bacteroidales;f__Bacteroidaceae;g__Phocaeicola;s__Phocaeicola coprocola	CRISPR	97.7	blast;96.00 iPHoP-RF;91.80
contig002103	vOTU001023	GB_GCA_025147485.1	d__Bacteria;p__Bacteroidota;c__Bacteroidia;o__Bacteroidales;f__Bacteroidaceae;g__Bacteroides;s__Bacteroides uniformis	CRISPR	96.9	iPHoP-RF;81.40
contig002103	vOTU001023	RS_GCF_900155865.1	d__Bacteria;p__Bacteroidota;c__Bacteroidia;o__Bacteroidales;f__Bacteroidaceae;g__Bacteroides;s__Bacteroides bouchesdurhonensis	iPHoP-RF	96.4	None
contig002103	vOTU001023	RS_GCF_900106755.1	d__Bacteria;p__Bacteroidota;c__Bacteroidia;o__Bacteroidales;f__Bacteroidaceae;g__Bacteroides;s__Bacteroides faecis	iPHoP-RF	95.4	None
contig002103	vOTU001023	GB_GCA_011959205.1	d__Bacteria;p__Bacteroidota;c__Bacteroidia;o__Bacteroidales;f__Bacteroidaceae;g__Phocaeicola;s__Phocaeicola sp011959205	iPHoP-RF	95.1	None
contig002103	vOTU001023	GB_GCA_900552075.1	d__Bacteria;p__Bacteroidota;c__Bacteroidia;o__Bacteroidales;f__Bacteroidaceae;g__Phocaeicola;s__Phocaeicola sp900552075	iPHoP-RF	95.1	blast;90.20
contig002103	vOTU001023	MGYG000128284	d__Bacteria;p__Bacteroidota;c__Bacteroidia;o__Bacteroidales;f__Bacteroidaceae;g__Phocaeicola;s__	iPHoP-RF	95.1	None
contig002103	vOTU001023	RS_GCF_900128455.1	d__Bacteria;p__Bacteroidota;c__Bacteroidia;o__Bacteroidales;f__Bacteroidaceae;g__Phocaeicola;s__Phocaeicola mediterraneensis	iPHoP-RF	95.1	blast;89.80
contig002103	vOTU001023	MGYG000250372	d__Bacteria;p__Bacteroidota;c__Bacteroidia;o__Bacteroidales;f__Bacteroidaceae;g__Phocaeicola;s__	iPHoP-RF	94.7	None
contig002103	vOTU001023	RS_GCF_000012825.1	d__Bacteria;p__Bacteroidota;c__Bacteroidia;o__Bacteroidales;f__Bacteroidaceae;g__Phocaeicola;s__Phocaeicola vulgatus	iPHoP-RF	94.7	blast;59.80
contig002103	vOTU001023	GB_GCA_900551445.1	d__Bacteria;p__Bacteroidota;c__Bacteroidia;o__Bacteroidales;f__Bacteroidaceae;g__Phocaeicola;s__Phocaeicola sp900551445	iPHoP-RF	94.1	blast;90.80
contig002103	vOTU001023	RS_GCF_003865075.1	d__Bacteria;p__Bacteroidota;c__Bacteroidia;o__Bacteroidales;f__Bacteroidaceae;g__Bacteroides;s__Bacteroides faecalis	iPHoP-RF	94.1	None
contig002103	vOTU001023	RS_GCF_021730445.1	d__Bacteria;p__Bacteroidota;c__Bacteroidia;o__Bacteroidales;f__Bacteroidaceae;g__Phocaeicola;s__Phocaeicola faecalis	iPHoP-RF	93.4	None
contig002103	vOTU001023	RS_GCF_000382445.1	d__Bacteria;p__Bacteroidota;c__Bacteroidia;o__Bacteroidales;f__Bacteroidaceae;g__Phocaeicola;s__Phocaeicola massiliensis	iPHoP-RF	93.1	None
contig002103	vOTU001023	GB_GCA_900542985.1	d__Bacteria;p__Bacteroidota;c__Bacteroidia;o__Bacteroidales;f__Bacteroidaceae;g__Phocaeicola;s__Phocaeicola sp900542985	iPHoP-RF	92.4	None
contig002103	vOTU001023	GB_GCA_900760795.1	d__Bacteria;p__Bacteroidota;c__Bacteroidia;o__Bacteroidales;f__Bacteroidaceae;g__Phocaeicola;s__Phocaeicola sp900760795	iPHoP-RF	92.1	None
contig002103	vOTU001023	RS_GCF_013009555.1	d__Bacteria;p__Bacteroidota;c__Bacteroidia;o__Bacteroidales;f__Bacteroidaceae;g__Phocaeicola;s__Phocaeicola dorei	iPHoP-RF	92.1	None
contig002103	vOTU001023	GB_GCA_905198575.1	d__Bacteria;p__Bacteroidota;c__Bacteroidia;o__Bacteroidales;f__Bacteroidaceae;g__Phocaeicola;s__Phocaeicola sp905198575	blast	91.7	iPHoP-RF;75.20
contig002103	vOTU001023	GB_GCA_900556845.1	d__Bacteria;p__Bacteroidota;c__Bacteroidia;o__Bacteroidales;f__Bacteroidaceae;g__Phocaeicola;s__Phocaeicola sp900556845	blast	91.1	iPHoP-RF;80.60
contig002103	vOTU001023	GB_GCA_902362375.1	d__Bacteria;p__Bacteroidota;c__Bacteroidia;o__Bacteroidales;f__Bacteroidaceae;g__Bacteroides;s__Bacteroides sp902362375	iPHoP-RF	90.8	None
contig002108	vOTU000767	RS_GCF_003437535.1	d__Bacteria;p__Bacteroidota;c__Bacteroidia;o__Bacteroidales;f__Bacteroidaceae;g__Phocaeicola;s__Phocaeicola plebeius_A	blast	98.3	iPHoP-RF;96.40 CRISPR;94.00
contig002108	vOTU000767	RS_GCF_000187895.1	d__Bacteria;p__Bacteroidota;c__Bacteroidia;o__Bacteroidales;f__Bacteroidaceae;g__Phocaeicola;s__Phocaeicola plebeius	blast	96.8	iPHoP-RF;96.70 CRISPR;96.70
contig002108	vOTU000767	GB_GCA_902362595.1	d__Bacteria;p__Bacteroidota;c__Bacteroidia;o__Bacteroidales;f__Bacteroidaceae;g__Phocaeicola;s__Phocaeicola merdigallinarum	iPHoP-RF	96.7	blast;86.10
contig002108	vOTU000767	RS_GCF_000157915.1	d__Bacteria;p__Bacteroidota;c__Bacteroidia;o__Bacteroidales;f__Bacteroidaceae;g__Phocaeicola;s__Phocaeicola coprophilus	blast	96.6	iPHoP-RF;77.80
contig002108	vOTU000767	GB_GCA_900551445.1	d__Bacteria;p__Bacteroidota;c__Bacteroidia;o__Bacteroidales;f__Bacteroidaceae;g__Phocaeicola;s__Phocaeicola sp900551445	iPHoP-RF	96.4	None
contig002108	vOTU000767	RS_GCF_900128455.1	d__Bacteria;p__Bacteroidota;c__Bacteroidia;o__Bacteroidales;f__Bacteroidaceae;g__Phocaeicola;s__Phocaeicola mediterraneensis	iPHoP-RF	96.4	None
contig002108	vOTU000767	GB_GCA_900552075.1	d__Bacteria;p__Bacteroidota;c__Bacteroidia;o__Bacteroidales;f__Bacteroidaceae;g__Phocaeicola;s__Phocaeicola sp900552075	iPHoP-RF	96.1	blast;80.20
contig002108	vOTU000767	RS_GCF_016900355.1	d__Bacteria;p__Bacteroidota;c__Bacteroidia;o__Bacteroidales;f__Bacteroidaceae;g__Phocaeicola;s__Phocaeicola sp900551065	iPHoP-RF	94.7	None
contig002124	vOTU000773	GB_GCA_019120545.1	d__Bacteria;p__Bacillota_A;c__Clostridia;o__Lachnospirales;f__Lachnospiraceae;g__Blautia;s__Blautia stercoripullorum	CRISPR	98.8	blast;89.10 iPHoP-RF;77.80
contig002124	vOTU000773	GB_GCA_019112785.1	d__Bacteria;p__Bacillota_A;c__Clostridia;o__Lachnospirales;f__Lachnospiraceae;g__Blautia;s__Blautia stercorigallinarum	CRISPR	97.9	blast;89.10 iPHoP-RF;74.30
contig002124	vOTU000773	MGYG000309299	d__Bacteria;p__Bacillota_A;c__Clostridia;o__Lachnospirales;f__Lachnospiraceae;g__Ruminococcus_G;s__	blast	93.1	None
contig002124	vOTU000773	RS_GCF_002161285.1	d__Bacteria;p__Bacillota_A;c__Clostridia;o__Lachnospirales;f__Lachnospiraceae;g__Blautia;s__Blautia ornithocaccae	CRISPR	92.8	blast;86.10 iPHoP-RF;74.30
contig002124	vOTU000773	GB_GCA_900765525.1	d__Bacteria;p__Bacillota_A;c__Clostridia;o__Lachnospirales;f__Lachnospiraceae;g__Blautia;s__Blautia pullicola	blast	90.6	CRISPR;73.00 iPHoP-RF;72.40
contig002126	vOTU000775	GB_GCA_900545005.1	d__Bacteria;p__Bacillota;c__Bacilli;o__RF39;f__UBA660;g__CAG-605;s__CAG-605 sp900545005	blast	93.8	iPHoP-RF;69.50
contig002126	vOTU000775	GB_GCA_934095865.1	d__Bacteria;p__Bacillota;c__Bacilli;o__RF39;f__UBA660;g__CAG-605;s__CAG-605 sp934095865	blast	93.5	iPHoP-RF;67.70
contig002126	vOTU000775	GB_GCA_905205665.1	d__Bacteria;p__Bacillota;c__Bacilli;o__RF39;f__UBA660;g__Ventrenecus;s__Ventrenecus sp905205665	blast	91	None
contig002130	vOTU000777	RS_GCF_005121165.3	d__Bacteria;p__Bacillota_A;c__Clostridia;o__Oscillospirales;f__Oscillospiraceae;g__Dysosmobacter;s__Dysosmobacter welbionis	blast	92.8	iPHoP-RF;65.30
contig002133	vOTU000779	GB_GCA_902362775.1	d__Bacteria;p__Bacillota_A;c__Clostridia;o__Oscillospirales;f__Oscillospiraceae;g__Lawsonibacter;s__Lawsonibacter sp900066645	blast	90	None
contig002134	vOTU000780	RS_GCF_900604355.1	d__Bacteria;p__Bacillota_A;c__Clostridia;o__Lachnospirales;f__Lachnospiraceae;g__Luxibacter;s__Luxibacter massiliensis	blast	92.7	None
contig002135	vOTU000781	RS_GCF_000153925.1	d__Bacteria;p__Bacillota_A;c__Clostridia;o__Lachnospirales;f__Lachnospiraceae;g__Mediterraneibacter;s__Mediterraneibacter torques	blast	95.7	iPHoP-RF;53.30
contig002135	vOTU000781	GB_GCA_019112765.1	d__Bacteria;p__Bacillota_A;c__Clostridia;o__Lachnospirales;f__Lachnospiraceae;g__Mediterraneibacter;s__Mediterraneibacter norwichensis	blast	93.8	iPHoP-RF;86.70 CRISPR;67.60
contig002135	vOTU000781	GB_GCA_019117305.1	d__Bacteria;p__Bacillota_A;c__Clostridia;o__Lachnospirales;f__Lachnospiraceae;g__Mediterraneibacter;s__Mediterraneibacter merdigallinarum	blast	91.9	iPHoP-RF;83.30 CRISPR;74.50
contig002135	vOTU000781	GB_GCA_019115385.1	d__Bacteria;p__Bacillota_A;c__Clostridia;o__Lachnospirales;f__Lachnospiraceae;g__Mediterraneibacter;s__Mediterraneibacter avicola	blast	90.8	iPHoP-RF;69.50
contig002135	vOTU000781	GB_GCA_944376695.1	d__Bacteria;p__Bacillota_A;c__Clostridia;o__Lachnospirales;f__Lachnospiraceae;g__Mediterraneibacter;s__Mediterraneibacter sp944376695	blast	90.8	iPHoP-RF;71.50
contig002135	vOTU000781	GB_GCA_019119675.1	d__Bacteria;p__Bacillota_A;c__Clostridia;o__Lachnospirales;f__Lachnospiraceae;g__Mediterraneibacter;s__Mediterraneibacter faecipullorum	blast	90.4	iPHoP-RF;65.60
contig002136	vOTU000782	GB_GCA_944380285.1	d__Bacteria;p__Bacillota_A;c__Clostridia;o__Christensenellales;f__UBA3700;g__Ornithoclostridium;s__Ornithoclostridium sp944380285	CRISPR	91.5	None
contig002150	vOTU000790	GB_GCA_934644855.1	d__Bacteria;p__Elusimicrobiota;c__Elusimicrobia;o__Elusimicrobiales;f__Elusimicrobiaceae;g__UBA1436;s__UBA1436 sp934644855	iPHoP-RF	97.1	None
contig002150	vOTU000790	GB_GCA_944324655.1	d__Bacteria;p__Elusimicrobiota;c__Elusimicrobia;o__Elusimicrobiales;f__Elusimicrobiaceae;g__UBA1436;s__UBA1436 sp944324655	CRISPR	96.9	iPHoP-RF;93.70
contig002150	vOTU000790	GB_GCA_944324735.1	d__Bacteria;p__Elusimicrobiota;c__Elusimicrobia;o__Elusimicrobiales;f__Elusimicrobiaceae;g__UBA1436;s__UBA1436 sp944324735	CRISPR	96.6	iPHoP-RF;95.70
contig002150	vOTU000790	GB_GCA_900540405.1	d__Bacteria;p__Elusimicrobiota;c__Elusimicrobia;o__Elusimicrobiales;f__Elusimicrobiaceae;g__UBA1436;s__UBA1436 sp900540405	iPHoP-RF	96.4	None
contig002150	vOTU000790	GB_GCA_934662565.1	d__Bacteria;p__Elusimicrobiota;c__Elusimicrobia;o__Elusimicrobiales;f__Elusimicrobiaceae;g__UBA1436;s__UBA1436 sp934662565	iPHoP-RF	96.4	None
contig002150	vOTU000790	GB_GCA_945483375.1	d__Bacteria;p__Elusimicrobiota;c__Elusimicrobia;o__Elusimicrobiales;f__Elusimicrobiaceae;g__UBA1436;s__UBA1436 sp945483375	iPHoP-RF	96.1	None
contig002150	vOTU000790	MGYG000301769	d__Bacteria;p__Elusimicrobiota;c__Elusimicrobia;o__Elusimicrobiales;f__Elusimicrobiaceae;g__UBA1436;s__	iPHoP-RF	95.7	None
contig002150	vOTU000790	GB_GCA_902794125.1	d__Bacteria;p__Elusimicrobiota;c__Elusimicrobia;o__Elusimicrobiales;f__Elusimicrobiaceae;g__UBA1436;s__UBA1436 sp902794125	iPHoP-RF	95.4	None
contig002150	vOTU000790	GB_GCA_002329395.1	d__Bacteria;p__Elusimicrobiota;c__Elusimicrobia;o__Elusimicrobiales;f__Elusimicrobiaceae;g__UBA1436;s__UBA1436 sp002329395	iPHoP-RF	95.1	None
contig002150	vOTU000790	GB_GCA_900541355.1	d__Bacteria;p__Elusimicrobiota;c__Elusimicrobia;o__Elusimicrobiales;f__Elusimicrobiaceae;g__UBA1436;s__UBA1436 sp900541355	iPHoP-RF	95.1	None
contig002150	vOTU000790	GB_GCA_944324965.1	d__Bacteria;p__Elusimicrobiota;c__Elusimicrobia;o__Elusimicrobiales;f__Elusimicrobiaceae;g__UBA1436;s__UBA1436 sp944324965	iPHoP-RF	95.1	None
contig002150	vOTU000790	GB_GCA_944325235.1	d__Bacteria;p__Elusimicrobiota;c__Elusimicrobia;o__Elusimicrobiales;f__Elusimicrobiaceae;g__UBA1436;s__UBA1436 sp944325235	iPHoP-RF	95.1	None
contig002150	vOTU000790	GB_GCA_017525025.1	d__Bacteria;p__Elusimicrobiota;c__Elusimicrobia;o__Elusimicrobiales;f__Elusimicrobiaceae;g__UBA1436;s__UBA1436 sp017525025	iPHoP-RF	94.7	None
contig002150	vOTU000790	GB_GCA_910576915.1	d__Bacteria;p__Elusimicrobiota;c__Elusimicrobia;o__Elusimicrobiales;f__Elusimicrobiaceae;g__UBA1436;s__UBA1436 sp910576915	iPHoP-RF	94.7	None
contig002150	vOTU000790	GB_GCA_015062115.1	d__Bacteria;p__Elusimicrobiota;c__Elusimicrobia;o__Elusimicrobiales;f__Elusimicrobiaceae;g__UBA1436;s__UBA1436 sp015062115	iPHoP-RF	94.4	None
contig002150	vOTU000790	GB_GCA_944327085.1	d__Bacteria;p__Elusimicrobiota;c__Elusimicrobia;o__Elusimicrobiales;f__Elusimicrobiaceae;g__UBA1436;s__UBA1436 sp944327085	iPHoP-RF	94.4	None
contig002150	vOTU000790	GB_GCA_944322825.1	d__Bacteria;p__Elusimicrobiota;c__Elusimicrobia;o__Elusimicrobiales;f__Elusimicrobiaceae;g__UBA1436;s__UBA1436 sp944322825	iPHoP-RF	94.1	None
contig002150	vOTU000790	GB_GCA_944325225.1	d__Bacteria;p__Elusimicrobiota;c__Elusimicrobia;o__Elusimicrobiales;f__Elusimicrobiaceae;g__UBA1436;s__UBA1436 sp944325225	iPHoP-RF	94.1	blast;93.50
contig002150	vOTU000790	GB_GCA_934667625.1	d__Bacteria;p__Elusimicrobiota;c__Elusimicrobia;o__Elusimicrobiales;f__Elusimicrobiaceae;g__UBA1436;s__UBA1436 sp934667625	iPHoP-RF	93.7	None
contig002150	vOTU000790	GB_GCA_944324095.1	d__Bacteria;p__Elusimicrobiota;c__Elusimicrobia;o__Elusimicrobiales;f__Elusimicrobiaceae;g__UBA1436;s__UBA1436 sp944324095	iPHoP-RF	93.7	None
contig002150	vOTU000790	GB_GCA_002432025.1	d__Bacteria;p__Elusimicrobiota;c__Elusimicrobia;o__Elusimicrobiales;f__Elusimicrobiaceae;g__UBA1436;s__UBA1436 sp002432025	iPHoP-RF	93.4	None
contig002150	vOTU000790	GB_GCA_902794895.1	d__Bacteria;p__Elusimicrobiota;c__Elusimicrobia;o__Elusimicrobiales;f__Elusimicrobiaceae;g__UBA1436;s__UBA1436 sp902794895	iPHoP-RF	93.4	None
contig002150	vOTU000790	GB_GCA_017468055.1	d__Bacteria;p__Elusimicrobiota;c__Elusimicrobia;o__Elusimicrobiales;f__Elusimicrobiaceae;g__Avelusimicrobium;s__Avelusimicrobium sp017468055	iPHoP-RF	92.8	None
contig002150	vOTU000790	GB_GCA_902765225.1	d__Bacteria;p__Elusimicrobiota;c__Elusimicrobia;o__Elusimicrobiales;f__Elusimicrobiaceae;g__UBA1436;s__UBA1436 sp902765225	iPHoP-RF	91.8	None
contig002150	vOTU000790	GB_GCA_944326765.1	d__Bacteria;p__Elusimicrobiota;c__Elusimicrobia;o__Elusimicrobiales;f__Elusimicrobiaceae;g__UBA1436;s__UBA1436 sp944326765	iPHoP-RF	91.4	None
contig002150	vOTU000790	GB_GCA_017646765.1	d__Bacteria;p__Elusimicrobiota;c__Elusimicrobia;o__Elusimicrobiales;f__Elusimicrobiaceae;g__UBA1436;s__UBA1436 sp017646765	iPHoP-RF	91.1	None
contig002150	vOTU000790	GB_GCA_024405075.1	d__Bacteria;p__Elusimicrobiota;c__Elusimicrobia;o__Elusimicrobiales;f__Elusimicrobiaceae;g__UBA1436;s__UBA1436 sp024405075	iPHoP-RF	91.1	None
contig002150	vOTU000790	GB_GCA_944325055.1	d__Bacteria;p__Elusimicrobiota;c__Elusimicrobia;o__Elusimicrobiales;f__Elusimicrobiaceae;g__UBA1436;s__UBA1436 sp944325055	iPHoP-RF	90.8	None
contig002150	vOTU000790	GB_GCA_944326725.1	d__Bacteria;p__Elusimicrobiota;c__Elusimicrobia;o__Elusimicrobiales;f__Elusimicrobiaceae;g__Avelusimicrobium;s__Avelusimicrobium sp944326725	iPHoP-RF	90.8	None
contig002150	vOTU000790	GB_GCA_944324635.1	d__Bacteria;p__Elusimicrobiota;c__Elusimicrobia;o__Elusimicrobiales;f__Elusimicrobiaceae;g__UBA1436;s__UBA1436 sp944324635	iPHoP-RF	90.1	None
contig002150	vOTU000790	GB_GCA_944324645.1	d__Bacteria;p__Elusimicrobiota;c__Elusimicrobia;o__Elusimicrobiales;f__Elusimicrobiaceae;g__Avelusimicrobium;s__Avelusimicrobium sp944324645	iPHoP-RF	90.1	None
contig002171	vOTU000795	GB_GCA_944329365.1	d__Bacteria;p__Bacillota;c__Bacilli;o__RF39;f__UBA660;g__Coprosoma;s__Coprosoma sp944329365	CRISPR	98	iPHoP-RF;69.50
contig002171	vOTU000795	GB_GCA_018713045.1	d__Bacteria;p__Bacillota;c__Bacilli;o__RF39;f__UBA660;g__Coprosoma;s__Coprosoma intestinipullorum	CRISPR	96.2	blast;80.00 iPHoP-RF;64.00
contig002171	vOTU000795	GB_GCA_900546055.1	d__Bacteria;p__Bacillota;c__Bacilli;o__RF39;f__UBA660;g__Coprosoma;s__Coprosoma sp900546055	blast	92.3	iPHoP-RF;72.20
contig002186	vOTU000803	GB_GCA_934643455.1	d__Bacteria;p__Elusimicrobiota;c__Elusimicrobia;o__Elusimicrobiales;f__Elusimicrobiaceae;g__UBA1174;s__UBA1174 sp900556855	blast	92.6	iPHoP-RF;69.10
contig002186	vOTU000803	GB_GCA_944324665.1	d__Bacteria;p__Elusimicrobiota;c__Elusimicrobia;o__Elusimicrobiales;f__Elusimicrobiaceae;g__UBA1174;s__UBA1174 sp944324665	blast	91.3	iPHoP-RF;57.30
contig002196	vOTU000805	GB_GCA_019112765.1	d__Bacteria;p__Bacillota_A;c__Clostridia;o__Lachnospirales;f__Lachnospiraceae;g__Mediterraneibacter;s__Mediterraneibacter norwichensis	CRISPR	97.2	iPHoP-RF;86.30
contig002196	vOTU000805	RS_GCF_003885045.1	d__Bacteria;p__Bacillota_A;c__Clostridia;o__Lachnospirales;f__Lachnospiraceae;g__Schaedlerella;s__Schaedlerella arabinosiphila	iPHoP-RF	93.7	None
contig002196	vOTU000805	GB_GCA_019113745.1	d__Bacteria;p__Bacillota_A;c__Clostridia;o__Lachnospirales;f__Lachnospiraceae;g__Blautia_A;s__Blautia_A intestinavium	blast	93.4	iPHoP-RF;59.20
contig002196	vOTU000805	RS_GCF_900142165.1	d__Bacteria;p__Bacillota_A;c__Clostridia;o__Lachnospirales;f__Lachnospiraceae;g__Hespellia;s__Hespellia stercorisuis	iPHoP-RF	92.4	None
contig002196	vOTU000805	GB_GCA_019117065.1	d__Bacteria;p__Bacillota_A;c__Clostridia;o__Lachnospirales;f__Lachnospiraceae;g__Mediterraneibacter;s__Mediterraneibacter pullicola	CRISPR	92.2	iPHoP-RF;80.30
contig002207	vOTU000810	RS_GCF_900475675.1	d__Bacteria;p__Bacillota;c__Bacilli;o__Lactobacillales;f__Streptococcaceae;g__Streptococcus;s__Streptococcus lutetiensis	blast	96.1	None
contig002207	vOTU000810	RS_GCF_012277075.1	d__Bacteria;p__Bacillota;c__Bacilli;o__Lactobacillales;f__Streptococcaceae;g__Streptococcus;s__Streptococcus alactolyticus	blast	95.7	None
contig002207	vOTU000810	RS_GCF_000154985.1	d__Bacteria;p__Bacillota;c__Bacilli;o__Lactobacillales;f__Streptococcaceae;g__Streptococcus;s__Streptococcus infantarius	blast	94.7	iPHoP-RF;50.20
contig002207	vOTU000810	RS_GCF_019794555.1	d__Bacteria;p__Bacillota;c__Bacilli;o__Lactobacillales;f__Streptococcaceae;g__Streptococcus;s__Streptococcus suis_AB	blast	90.8	iPHoP-RF;75.20
contig002210	vOTU000812	GB_GCA_900548545.1	d__Bacteria;p__Bacillota_A;c__Clostridia;o__Oscillospirales;f__Acutalibacteraceae;g__Acutalibacter;s__Acutalibacter sp900548545	blast	95.3	iPHoP-RF;92.40
contig002210	vOTU000812	RS_GCF_009936035.1	d__Bacteria;p__Bacillota_A;c__Clostridia;o__Oscillospirales;f__Acutalibacteraceae;g__Acutalibacter;s__Acutalibacter sp009936035	iPHoP-RF	92.4	None
contig002210	vOTU000812	GB_GCA_009917445.1	d__Bacteria;p__Bacillota_A;c__Clostridia;o__Oscillospirales;f__Acutalibacteraceae;g__Acutalibacter;s__Acutalibacter sp009917445	iPHoP-RF	90.5	None
contig002211	vOTU000813	GB_GCA_910585805.1	d__Bacteria;p__Bacillota_A;c__Clostridia;o__Lachnospirales;f__Lachnospiraceae;g__Acetatifactor;s__Acetatifactor sp910585805	blast	92.1	None
contig002217	vOTU000815	RS_GCF_023336935.1	d__Bacteria;p__Bacillota_C;c__Negativicutes;o__Acidaminococcales;f__Acidaminococcaceae;g__CAG-266;s__CAG-266 sp000436095	blast	96.7	iPHoP-RF;71.70
contig002221	vOTU000816	GB_GCA_900540045.1	d__Bacteria;p__Bacillota_A;c__Clostridia;o__Christensenellales;f__CAG-74;g__Limiplasma;s__Limiplasma merdipullorum	CRISPR	98.6	blast;93.80 iPHoP-RF;83.60
contig002221	vOTU000816	GB_GCA_900553905.1	d__Bacteria;p__Bacillota_A;c__Clostridia;o__Christensenellales;f__CAG-74;g__Limiplasma;s__Limiplasma pullistercoris	CRISPR	98.6	iPHoP-RF;76.60
contig002221	vOTU000816	GB_GCA_944349545.1	d__Bacteria;p__Bacillota_A;c__Clostridia;o__Christensenellales;f__CAG-74;g__Limiplasma;s__Limiplasma sp944349545	CRISPR	98.6	iPHoP-RF;78.70
contig002222	vOTU000817	RS_GCF_000158035.1	d__Bacteria;p__Bacteroidota;c__Bacteroidia;o__Bacteroidales;f__Bacteroidaceae;g__Bacteroides;s__Bacteroides cellulosilyticus	CRISPR	98.2	iPHoP-RF;95.10
contig002222	vOTU000817	RS_GCF_000315485.1	d__Bacteria;p__Bacteroidota;c__Bacteroidia;o__Bacteroidales;f__Bacteroidaceae;g__Bacteroides;s__Bacteroides oleiciplenus	CRISPR	98.1	iPHoP-RF;94.70
contig002222	vOTU000817	GB_GCA_014385165.1	d__Bacteria;p__Bacteroidota;c__Bacteroidia;o__Bacteroidales;f__Bacteroidaceae;g__Bacteroides;s__Bacteroides sp014385165	iPHoP-RF	97.1	None
contig002222	vOTU000817	RS_GCF_019239235.1	d__Bacteria;p__Bacteroidota;c__Bacteroidia;o__Bacteroidales;f__Bacteroidaceae;g__Mediterranea;s__Mediterranea pullorum	blast	96.8	iPHoP-RF;94.70
contig002222	vOTU000817	GB_GCA_945641355.1	d__Bacteria;p__Bacteroidota;c__Bacteroidia;o__Bacteroidales;f__Bacteroidaceae;g__Mediterranea;s__Mediterranea sp945641355	iPHoP-RF	96.4	None
contig002222	vOTU000817	RS_GCF_000517545.1	d__Bacteria;p__Bacteroidota;c__Bacteroidia;o__Bacteroidales;f__Bacteroidaceae;g__Bacteroides;s__Bacteroides reticulotermitis	iPHoP-RF	96.4	None
contig002222	vOTU000817	RS_GCF_903181435.1	d__Bacteria;p__Bacteroidota;c__Bacteroidia;o__Bacteroidales;f__Bacteroidaceae;g__Bacteroides;s__Bacteroides sp900765785	iPHoP-RF	95.7	None
contig002222	vOTU000817	GB_GCA_025147325.1	d__Bacteria;p__Bacteroidota;c__Bacteroidia;o__Bacteroidales;f__Bacteroidaceae;g__Bacteroides;s__Bacteroides stercoris	CRISPR	95.6	iPHoP-RF;63.30
contig002222	vOTU000817	RS_GCF_900128475.1	d__Bacteria;p__Bacteroidota;c__Bacteroidia;o__Bacteroidales;f__Bacteroidaceae;g__Mediterranea;s__Mediterranea massiliensis	iPHoP-RF	95.4	blast;95.20 CRISPR;90.30
contig002222	vOTU000817	GB_GCA_002293435.1	d__Bacteria;p__Bacteroidota;c__Bacteroidia;o__Bacteroidales;f__Bacteroidaceae;g__Bacteroides;s__Bacteroides sp002293435	iPHoP-RF	94.7	None
contig002222	vOTU000817	RS_GCF_000614185.1	d__Bacteria;p__Bacteroidota;c__Bacteroidia;o__Bacteroidales;f__Bacteroidaceae;g__Phocaeicola;s__Phocaeicola sartorii	iPHoP-RF	93.4	None
contig002222	vOTU000817	GB_GCA_019116805.1	d__Bacteria;p__Bacteroidota;c__Bacteroidia;o__Bacteroidales;f__Bacteroidaceae;g__Mediterranea;s__Mediterranea merdavium	iPHoP-RF	93.1	None
contig002222	vOTU000817	GB_GCA_944322275.1	d__Bacteria;p__Bacteroidota;c__Bacteroidia;o__Bacteroidales;f__Bacteroidaceae;g__Mediterranea;s__Mediterranea sp944322275	iPHoP-RF	93.1	None
contig002222	vOTU000817	GB_GCA_944319875.1	d__Bacteria;p__Bacteroidota;c__Bacteroidia;o__Bacteroidales;f__Bacteroidaceae;g__Mediterranea;s__Mediterranea sp944319875	iPHoP-RF	92.8	None
contig002222	vOTU000817	RS_GCF_900108345.1	d__Bacteria;p__Bacteroidota;c__Bacteroidia;o__Bacteroidales;f__Bacteroidaceae;g__Mediterranea;s__Mediterranea ndongoniae	blast	92.6	CRISPR;89.30 iPHoP-RF;74.80
contig002222	vOTU000817	GB_GCA_944322355.1	d__Bacteria;p__Bacteroidota;c__Bacteroidia;o__Bacteroidales;f__Bacteroidaceae;g__Mediterranea;s__Mediterranea sp944322355	iPHoP-RF	92.4	None
contig002222	vOTU000817	GB_GCA_900553815.1	d__Bacteria;p__Bacteroidota;c__Bacteroidia;o__Bacteroidales;f__Bacteroidaceae;g__Mediterranea;s__Mediterranea sp900553815	blast	92	iPHoP-RF;88.20
contig002222	vOTU000817	GB_GCA_902388495.1	d__Bacteria;p__Bacteroidota;c__Bacteroidia;o__Bacteroidales;f__Bacteroidaceae;g__Bacteroides;s__Bacteroides sp902388495	iPHoP-RF	91.1	None
contig002222	vOTU000817	MGYG000165276	d__Bacteria;p__Bacteroidota;c__Bacteroidia;o__Bacteroidales;f__Bacteroidaceae;g__Bacteroides;s__	iPHoP-RF	90.5	None
contig002227	vOTU000820	GB_GCA_003573975.1	d__Bacteria;p__Bacillota_A;c__Clostridia;o__Oscillospirales;f__Oscillospiraceae;g__Lawsonibacter;s__Lawsonibacter sp900066825	blast	95	iPHoP-RF;74.10
contig002227	vOTU000820	GB_GCA_022846095.1	d__Bacteria;p__Bacillota_A;c__Clostridia;o__Oscillospirales;f__Oscillospiraceae;g__UMGS1202;s__UMGS1202 sp900549565	blast	93.9	iPHoP-RF;79.00
contig002227	vOTU000820	RS_GCF_000239295.1	d__Bacteria;p__Bacillota_A;c__Clostridia;o__Oscillospirales;f__Oscillospiraceae;g__Flavonifractor;s__Flavonifractor plautii	blast	92	iPHoP-RF;60.60
contig002227	vOTU000820	GB_GCA_902362775.1	d__Bacteria;p__Bacillota_A;c__Clostridia;o__Oscillospirales;f__Oscillospiraceae;g__Lawsonibacter;s__Lawsonibacter sp900066645	blast	90.9	iPHoP-RF;56.50
contig002228	vOTU138713	RS_GCF_000012825.1	d__Bacteria;p__Bacteroidota;c__Bacteroidia;o__Bacteroidales;f__Bacteroidaceae;g__Phocaeicola;s__Phocaeicola vulgatus	blast	95.4	iPHoP-RF;74.60
contig002228	vOTU138713	RS_GCF_013009555.1	d__Bacteria;p__Bacteroidota;c__Bacteroidia;o__Bacteroidales;f__Bacteroidaceae;g__Phocaeicola;s__Phocaeicola dorei	blast	94.9	iPHoP-RF;74.80
contig002228	vOTU138713	GB_GCA_000434235.1	d__Bacteria;p__Bacteroidota;c__Bacteroidia;o__Bacteroidales;f__Rikenellaceae;g__Alistipes;s__Alistipes avistercoris	blast	90.9	None
contig002228	vOTU138713	GB_GCA_902363575.1	d__Bacteria;p__Bacteroidota;c__Bacteroidia;o__Bacteroidales;f__Rikenellaceae;g__Alistipes;s__Alistipes sp902363575	blast	90.5	None
contig002229	vOTU000821	GB_GCA_900546055.1	d__Bacteria;p__Bacillota;c__Bacilli;o__RF39;f__UBA660;g__Coprosoma;s__Coprosoma sp900546055	blast	90.8	iPHoP-RF;71.50
contig002245	vOTU000825	GB_GCA_900544635.1	d__Bacteria;p__Synergistota;c__Synergistia;o__Synergistales;f__Synergistaceae;g__Caccocola;s__Caccocola faecigallinarum	blast	96.5	iPHoP-RF;68.60
contig002245	vOTU000825	GB_GCA_900545755.1	d__Bacteria;p__Synergistota;c__Synergistia;o__Synergistales;f__Synergistaceae;g__Caccocola;s__Caccocola sp900545755	blast	93.7	CRISPR;92.90 iPHoP-RF;70.00
contig002245	vOTU000825	RS_GCF_002159945.1	d__Bacteria;p__Synergistota;c__Synergistia;o__Synergistales;f__Synergistaceae;g__Caccocola;s__Caccocola sp002159945	blast	93.6	iPHoP-RF;58.70
contig002248	vOTU000826	GB_GCA_900045905.1	d__Bacteria;p__Bacillota_A;c__Clostridia;o__Lachnospirales;f__Lachnospiraceae;g__Fimimorpha;s__Fimimorpha sp900045905	CRISPR	96.9	None
contig002248	vOTU000826	GB_GCA_018712075.1	d__Bacteria;p__Bacillota_A;c__Clostridia;o__Lachnospirales;f__Lachnospiraceae;g__Fimimorpha;s__Fimimorpha faecalis	CRISPR	95.7	None
contig002248	vOTU000826	MGYG000314054	d__Bacteria;p__Bacillota_A;c__Clostridia;o__Lachnospirales;f__Lachnospiraceae;g__Mediterraneibacter;s__	blast	91.6	iPHoP-RF;51.50
contig002248	vOTU000826	MGYG000309908	d__Bacteria;p__Bacillota_A;c__Clostridia;o__Lachnospirales;f__Lachnospiraceae;g__Mediterraneibacter;s__	blast	91.5	iPHoP-RF;51.20
contig002261	vOTU000829	RS_GCF_002160135.1	d__Bacteria;p__Bacillota_A;c__Clostridia;o__Lachnospirales;f__Lachnospiraceae;g__Choladocola;s__Choladocola avistercoris	blast	93.8	None
contig002273	vOTU000833	GB_GCA_019116445.1	d__Bacteria;p__Bacillota_A;c__Clostridia;o__Oscillospirales;f__Ruminococcaceae;g__Gemmiger;s__Gemmiger excrementigallinarum	blast	96.1	iPHoP-RF;80.30
contig002273	vOTU000833	GB_GCA_003343905.1	d__Bacteria;p__Bacillota_A;c__Clostridia;o__Oscillospirales;f__Ruminococcaceae;g__Gemmiger;s__Gemmiger variabilis_C	blast	95.7	iPHoP-RF;72.80
contig002273	vOTU000833	GB_GCA_900545545.1	d__Bacteria;p__Bacillota_A;c__Clostridia;o__Oscillospirales;f__Ruminococcaceae;g__Gemmiger;s__Gemmiger sp900545545	blast	95.2	iPHoP-RF;79.00
contig002273	vOTU000833	GB_GCA_025152575.1	d__Bacteria;p__Bacillota_A;c__Clostridia;o__Oscillospirales;f__Ruminococcaceae;g__Gemmiger;s__Gemmiger variabilis	blast	94.8	iPHoP-RF;78.70
contig002273	vOTU000833	GB_GCA_004000625.1	d__Bacteria;p__Bacillota_A;c__Clostridia;o__Oscillospirales;f__Ruminococcaceae;g__Gemmiger;s__Gemmiger qucibialis	blast	94.6	iPHoP-RF;67.00
contig002295	vOTU000840	GB_GCA_900552265.1	d__Bacteria;p__Bacillota_A;c__Clostridia;o__Oscillospirales;f__Acutalibacteraceae;g__UMGS1491;s__UMGS1491 sp900552265	blast	94.4	iPHoP-RF;60.10
contig002295	vOTU000840	GB_GCA_934728355.1	d__Bacteria;p__Bacillota_A;c__Clostridia;o__Oscillospirales;f__Acutalibacteraceae;g__UMGS1491;s__UMGS1491 sp934728355	blast	91.7	None
contig002297	vOTU000841	RS_GCF_023336935.1	d__Bacteria;p__Bacillota_C;c__Negativicutes;o__Acidaminococcales;f__Acidaminococcaceae;g__CAG-266;s__CAG-266 sp000436095	blast	98.4	iPHoP-RF;79.00 CRISPR;78.90
contig002310	vOTU000848	GB_GCA_944349545.1	d__Bacteria;p__Bacillota_A;c__Clostridia;o__Christensenellales;f__CAG-74;g__Limiplasma;s__Limiplasma sp944349545	CRISPR	97.5	iPHoP-RF;82.50
contig002310	vOTU000848	GB_GCA_018710985.1	d__Bacteria;p__Bacillota_A;c__Clostridia;o__Christensenellales;f__CAG-74;g__Limiplasma;s__Limiplasma pullicola	CRISPR	96.4	iPHoP-RF;80.80
contig002310	vOTU000848	GB_GCA_900540045.1	d__Bacteria;p__Bacillota_A;c__Clostridia;o__Christensenellales;f__CAG-74;g__Limiplasma;s__Limiplasma merdipullorum	blast	95.9	CRISPR;95.10 iPHoP-RF;93.70
contig002310	vOTU000848	GB_GCA_934643535.1	d__Bacteria;p__Bacillota_A;c__Clostridia;o__Christensenellales;f__CAG-74;g__Limiplasma;s__Limiplasma sp934643535	iPHoP-RF	91.4	None
contig002310	vOTU000848	GB_GCA_004556545.1	d__Bacteria;p__Bacillota_A;c__Clostridia;o__Christensenellales;f__CAG-74;g__Limiplasma;s__Limiplasma sp004556545	iPHoP-RF	90.8	None
contig002310	vOTU000848	GB_GCA_900548145.1	d__Bacteria;p__Bacillota_A;c__Clostridia;o__Christensenellales;f__CAG-74;g__Limiplasma;s__Limiplasma sp900548145	iPHoP-RF	90.8	None
contig002313	vOTU000849	RS_GCF_003425665.1	d__Bacteria;p__Bacillota_A;c__Clostridia;o__Oscillospirales;f__Oscillospiraceae;g__Evtepia;s__Evtepia gabavorous	blast	91.7	iPHoP-RF;51.50
contig002313	vOTU000849	GB_GCA_900548545.1	d__Bacteria;p__Bacillota_A;c__Clostridia;o__Oscillospirales;f__Acutalibacteraceae;g__Acutalibacter;s__Acutalibacter sp900548545	blast	91.5	iPHoP-RF;58.40
contig002319	vOTU000852	RS_GCF_000025985.1	d__Bacteria;p__Bacteroidota;c__Bacteroidia;o__Bacteroidales;f__Bacteroidaceae;g__Bacteroides;s__Bacteroides fragilis	CRISPR	98.8	None
contig002319	vOTU000852	RS_GCF_000382445.1	d__Bacteria;p__Bacteroidota;c__Bacteroidia;o__Bacteroidales;f__Bacteroidaceae;g__Phocaeicola;s__Phocaeicola massiliensis	CRISPR	98.5	None
contig002319	vOTU000852	RS_GCF_000195635.1	d__Bacteria;p__Bacteroidota;c__Bacteroidia;o__Bacteroidales;f__Bacteroidaceae;g__Bacteroides;s__Bacteroides fluxus	CRISPR	97.8	None
contig002319	vOTU000852	GB_GCA_900552465.1	d__Bacteria;p__Bacteroidota;c__Bacteroidia;o__Bacteroidales;f__Tannerellaceae;g__Parabacteroides;s__Parabacteroides sp900552465	blast	93.4	iPHoP-RF;56.00
contig002319	vOTU000852	RS_GCF_013009555.1	d__Bacteria;p__Bacteroidota;c__Bacteroidia;o__Bacteroidales;f__Bacteroidaceae;g__Phocaeicola;s__Phocaeicola dorei	CRISPR	91.9	None
contig002325	vOTU000854	GB_GCA_900544635.1	d__Bacteria;p__Synergistota;c__Synergistia;o__Synergistales;f__Synergistaceae;g__Caccocola;s__Caccocola faecigallinarum	CRISPR	97.5	blast;95.40 iPHoP-RF;82.80
contig002325	vOTU000854	GB_GCA_900545755.1	d__Bacteria;p__Synergistota;c__Synergistia;o__Synergistales;f__Synergistaceae;g__Caccocola;s__Caccocola sp900545755	CRISPR	97.2	None
contig002325	vOTU000854	RS_GCF_002159945.1	d__Bacteria;p__Synergistota;c__Synergistia;o__Synergistales;f__Synergistaceae;g__Caccocola;s__Caccocola sp002159945	blast	92.5	iPHoP-RF;76.60
contig002329	vOTU000856	RS_GCF_000156375.1	d__Bacteria;p__Desulfobacterota;c__Desulfovibrionia;o__Desulfovibrionales;f__Desulfovibrionaceae;g__Desulfovibrio;s__Desulfovibrio piger	CRISPR	97.1	blast;95.00 iPHoP-RF;93.70
contig002329	vOTU000856	RS_GCF_012843875.1	d__Bacteria;p__Desulfobacterota;c__Desulfovibrionia;o__Desulfovibrionales;f__Desulfovibrionaceae;g__Desulfovibrio;s__Desulfovibrio sp900556755	blast	96.8	CRISPR;96.00 iPHoP-RF;93.70
contig002329	vOTU000856	MGYG000002687	d__Bacteria;p__Desulfobacterota;c__Desulfovibrionia;o__Desulfovibrionales;f__Desulfovibrionaceae;g__Desulfovibrio;s__	iPHoP-RF	94.4	blast;93.80
contig002349	vOTU116033	RS_GCF_020687245.1	d__Bacteria;p__Bacillota_A;c__Clostridia;o__Oscillospirales;f__Ruminococcaceae;g__Faecalibacterium;s__Faecalibacterium longum	blast	95	None
contig002349	vOTU116033	GB_GCA_900540455.1	d__Bacteria;p__Bacillota_A;c__Clostridia;o__Oscillospirales;f__Ruminococcaceae;g__Faecalibacterium;s__Faecalibacterium sp900540455	blast	91.8	None
contig002349	vOTU116033	RS_GCF_023347275.1	d__Bacteria;p__Bacillota_A;c__Clostridia;o__Oscillospirales;f__Ruminococcaceae;g__Faecalibacterium;s__Faecalibacterium sp900758465	blast	91.2	None
contig002358	vOTU136164	RS_GCF_020736365.1	d__Bacteria;p__Bacillota_A;c__Clostridia;o__Lachnospirales;f__Lachnospiraceae;g__Clostridium_Q;s__Clostridium_Q saccharolyticum_A	blast	91.4	None
contig002384	vOTU000871	GB_GCA_018713375.1	d__Bacteria;p__Bacillota_A;c__Clostridia;o__Oscillospirales;f__Oscillospiraceae;g__Scatomorpha;s__Scatomorpha stercorigallinarum	iPHoP-RF	92.1	CRISPR;76.40
contig002384	vOTU000871	GB_GCA_900759385.1	d__Bacteria;p__Bacillota_A;c__Clostridia;o__Oscillospirales;f__Oscillospiraceae;g__Scatomorpha;s__Scatomorpha sp900759385	blast	92.1	iPHoP-RF;55.70
contig002388	vOTU000873	GB_GCA_900554095.1	d__Bacteria;p__Cyanobacteriota;c__Vampirovibrionia;o__Gastranaerophilales;f__Gastranaerophilaceae;g__Scatenecus;s__Scatenecus sp900554095	CRISPR	96.1	iPHoP-RF;68.60
contig002400	vOTU000878	RS_GCF_016901835.1	d__Bacteria;p__Pseudomonadota;c__Gammaproteobacteria;o__Burkholderiales;f__Burkholderiaceae_A;g__Aphodousia;s__Aphodousia secunda_A	blast	93.7	iPHoP-RF;87.00 CRISPR;70.70
contig002400	vOTU000878	GB_GCA_002329575.1	d__Bacteria;p__Pseudomonadota;c__Gammaproteobacteria;o__Burkholderiales;f__Burkholderiaceae_A;g__Aphodousia;s__Aphodousia sp002329575	blast	92.4	iPHoP-RF;73.70
contig002400	vOTU000878	GB_GCA_944390675.1	d__Bacteria;p__Pseudomonadota;c__Gammaproteobacteria;o__Burkholderiales;f__Burkholderiaceae_A;g__Aphodousia;s__Aphodousia sp944390675	blast	91.7	iPHoP-RF;74.30
contig002401	vOTU000879	RS_GCF_900128475.1	d__Bacteria;p__Bacteroidota;c__Bacteroidia;o__Bacteroidales;f__Bacteroidaceae;g__Mediterranea;s__Mediterranea massiliensis	CRISPR	98.9	blast;94.50 iPHoP-RF;89.80
contig002401	vOTU000879	RS_GCF_019239235.1	d__Bacteria;p__Bacteroidota;c__Bacteroidia;o__Bacteroidales;f__Bacteroidaceae;g__Mediterranea;s__Mediterranea pullorum	CRISPR	98.3	blast;96.30 iPHoP-RF;92.10
contig002401	vOTU000879	MGYG000172350	d__Bacteria;p__Bacteroidota;c__Bacteroidia;o__Bacteroidales;f__Bacteroidaceae;g__Mediterranea;s__	iPHoP-RF	93.4	blast;90.00
contig002401	vOTU000879	GB_GCA_019116805.1	d__Bacteria;p__Bacteroidota;c__Bacteroidia;o__Bacteroidales;f__Bacteroidaceae;g__Mediterranea;s__Mediterranea merdavium	iPHoP-RF	93.1	None
contig002401	vOTU000879	MGYG000171082	d__Bacteria;p__Bacteroidota;c__Bacteroidia;o__Bacteroidales;f__Bacteroidaceae;g__Mediterranea;s__	iPHoP-RF	93.1	blast;88.40
contig002401	vOTU000879	GB_GCA_900553815.1	d__Bacteria;p__Bacteroidota;c__Bacteroidia;o__Bacteroidales;f__Bacteroidaceae;g__Mediterranea;s__Mediterranea sp900553815	CRISPR	92.9	blast;85.30 iPHoP-RF;67.50
contig002401	vOTU000879	MGYG000004188	d__Bacteria;p__Bacteroidota;c__Bacteroidia;o__Bacteroidales;f__Bacteroidaceae;g__Mediterranea;s__	blast	90.6	iPHoP-RF;90.50
contig002401	vOTU000879	RS_GCF_900108345.1	d__Bacteria;p__Bacteroidota;c__Bacteroidia;o__Bacteroidales;f__Bacteroidaceae;g__Mediterranea;s__Mediterranea ndongoniae	blast	90.4	iPHoP-RF;82.50
contig002402	vOTU000880	GB_GCA_018715465.1	d__Bacteria;p__Bacillota_A;c__Clostridia;o__Oscillospirales;f__Ruminococcaceae;g__Faecivivens;s__Faecivivens stercorigallinarum	blast	95.3	iPHoP-RF;79.80
contig002402	vOTU000880	GB_GCA_944386805.1	d__Bacteria;p__Bacillota_A;c__Clostridia;o__Oscillospirales;f__Ruminococcaceae;g__Faecivivens;s__Faecivivens sp944386805	blast	91.9	iPHoP-RF;54.90
contig002402	vOTU000880	GB_GCA_018715285.1	d__Bacteria;p__Bacillota_A;c__Clostridia;o__Oscillospirales;f__Ruminococcaceae;g__Faecivivens;s__Faecivivens stercoripullorum	blast	91.6	iPHoP-RF;77.10
contig002404	vOTU000882	GB_GCA_019114545.1	d__Bacteria;p__Bacillota_A;c__Clostridia;o__Lachnospirales;f__Lachnospiraceae;g__Blautia;s__Blautia pullistercoris	CRISPR	98.1	iPHoP-RF;72.60
contig002404	vOTU000882	GB_GCA_019118685.1	d__Bacteria;p__Bacillota_A;c__Clostridia;o__Lachnospirales;f__Lachnospiraceae;g__Blautia;s__Blautia merdipullorum	CRISPR	95.3	iPHoP-RF;94.10 blast;92.30
contig002404	vOTU000882	GB_GCA_019120545.1	d__Bacteria;p__Bacillota_A;c__Clostridia;o__Lachnospirales;f__Lachnospiraceae;g__Blautia;s__Blautia stercoripullorum	CRISPR	92.1	iPHoP-RF;81.90
contig002412	vOTU000884	RS_GCF_000012825.1	d__Bacteria;p__Bacteroidota;c__Bacteroidia;o__Bacteroidales;f__Bacteroidaceae;g__Phocaeicola;s__Phocaeicola vulgatus	blast	95.8	iPHoP-RF;94.10 CRISPR;94.10
contig002412	vOTU000884	RS_GCF_900106755.1	d__Bacteria;p__Bacteroidota;c__Bacteroidia;o__Bacteroidales;f__Bacteroidaceae;g__Bacteroides;s__Bacteroides faecis	iPHoP-RF	93.4	CRISPR;86.70
contig002412	vOTU000884	RS_GCF_001314995.1	d__Bacteria;p__Bacteroidota;c__Bacteroidia;o__Bacteroidales;f__Bacteroidaceae;g__Bacteroides;s__Bacteroides ovatus	iPHoP-RF	93.1	CRISPR;74.60
contig002413	vOTU001072	GB_GCA_944324675.1	d__Bacteria;p__Elusimicrobiota;c__Elusimicrobia;o__Elusimicrobiales;f__Elusimicrobiaceae;g__UBA1174;s__UBA1174 sp944324675	blast	93.4	iPHoP-RF;68.00
contig002413	vOTU001072	GB_GCA_944324665.1	d__Bacteria;p__Elusimicrobiota;c__Elusimicrobia;o__Elusimicrobiales;f__Elusimicrobiaceae;g__UBA1174;s__UBA1174 sp944324665	blast	92.3	None
contig002413	vOTU001072	GB_GCA_934643455.1	d__Bacteria;p__Elusimicrobiota;c__Elusimicrobia;o__Elusimicrobiales;f__Elusimicrobiaceae;g__UBA1174;s__UBA1174 sp900556855	blast	92.2	None
contig002419	vOTU084318	3300014826_6	d__Bacteria;p__Patescibacteria;c__JAEDAM01;o__Absconditabacterales;f__Absconditicoccaceae;g__HOT-345;s__	blast	96.2	None
contig002420	vOTU000888	GB_GCA_019418625.1	d__Bacteria;p__Bacillota_A;c__Clostridia;o__Oscillospirales;f__Oscillospiraceae;g__Dysosmobacter;s__Dysosmobacter sp019418625	blast	92.1	iPHoP-RF;73.70
contig002420	vOTU000888	GB_GCA_944387035.1	d__Bacteria;p__Bacillota_A;c__Clostridia;o__Oscillospirales;f__Oscillospiraceae;g__Dysosmobacter;s__Dysosmobacter sp944387035	blast	92	iPHoP-RF;68.20
contig002420	vOTU000888	RS_GCF_005121165.3	d__Bacteria;p__Bacillota_A;c__Clostridia;o__Oscillospirales;f__Oscillospiraceae;g__Dysosmobacter;s__Dysosmobacter welbionis	blast	91.7	iPHoP-RF;79.80
contig002430	vOTU000895	GB_GCA_902786275.1	d__Bacteria;p__Bacillota;c__Bacilli;o__RF39;f__UBA660;g__RUG13160;s__RUG13160 sp902786275	blast	91.6	iPHoP-RF;79.00
contig002431	vOTU000896	GB_GCA_944387485.1	d__Bacteria;p__Bacillota_A;c__Clostridia;o__TANB77;f__CAG-508;g__CAG-269;s__CAG-269 sp944387485	blast	91	None
contig002432	vOTU000897	GB_GCA_944325345.1	d__Bacteria;p__Bacteroidota;c__Bacteroidia;o__Bacteroidales;f__Tannerellaceae;g__Parabacteroides;s__Parabacteroides sp944325345	CRISPR	96.8	None
contig002432	vOTU000897	RS_GCF_000012825.1	d__Bacteria;p__Bacteroidota;c__Bacteroidia;o__Bacteroidales;f__Bacteroidaceae;g__Phocaeicola;s__Phocaeicola vulgatus	blast	95.8	iPHoP-RF;71.90
contig002433	vOTU000898	GB_GCA_944368775.1	d__Bacteria;p__Bacillota_A;c__Clostridia;o__Christensenellales;f__Borkfalkiaceae;g__Borkfalkia;s__Borkfalkia sp944368775	CRISPR	99.3	iPHoP-RF;68.60
contig002433	vOTU000898	GB_GCA_904419945.1	d__Bacteria;p__Bacillota_A;c__Clostridia;o__Christensenellales;f__Borkfalkiaceae;g__Borkfalkia;s__Borkfalkia sp904419945	blast	96.6	iPHoP-RF;73.20
contig002438	vOTU000902	GB_GCA_944324045.1	d__Bacteria;p__Desulfobacterota;c__Desulfovibrionia;o__Desulfovibrionales;f__Desulfovibrionaceae;g__CALUUT01;s__CALUUT01 sp944324045	blast	90.8	None
contig002441	vOTU000904	GB_GCA_018716755.1	d__Bacteria;p__Bacillota_A;c__Clostridia;o__Christensenellales;f__CAG-74;g__Alectryocaccomicrobium;s__Alectryocaccomicrobium excrementavium	blast	93.5	None
contig002441	vOTU000904	GB_GCA_944387615.1	d__Bacteria;p__Bacillota_A;c__Clostridia;o__Oscillospirales;f__Oscillospiraceae;g__Faecousia;s__Faecousia sp944387615	blast	92.1	iPHoP-RF;69.80
contig002442	vOTU000905	GB_GCA_900548545.1	d__Bacteria;p__Bacillota_A;c__Clostridia;o__Oscillospirales;f__Acutalibacteraceae;g__Acutalibacter;s__Acutalibacter sp900548545	blast	93.9	iPHoP-RF;82.80
contig002457	vOTU000910	GB_GCA_001917125.1	d__Bacteria;p__Pseudomonadota;c__Alphaproteobacteria;o__RF32;f__CAG-239;g__Scatocola;s__Scatocola faecipullorum	CRISPR	97.4	iPHoP-RF;71.50
contig002457	vOTU000910	GB_GCA_000436375.1	d__Bacteria;p__Pseudomonadota;c__Alphaproteobacteria;o__RF32;f__CAG-239;g__Scatacola_A;s__Scatacola_A faecigallinarum	CRISPR	95.1	iPHoP-RF;58.40
contig002457	vOTU000910	GB_GCA_001917175.1	d__Bacteria;p__Pseudomonadota;c__Alphaproteobacteria;o__RF32;f__CAG-239;g__51-20;s__51-20 sp001917175	CRISPR	90.4	None
contig002458	vOTU000911	RS_GCF_016901835.1	d__Bacteria;p__Pseudomonadota;c__Gammaproteobacteria;o__Burkholderiales;f__Burkholderiaceae_A;g__Aphodousia;s__Aphodousia secunda_A	blast	95.2	iPHoP-RF;57.10
contig002458	vOTU000911	RS_GCF_023336895.1	d__Bacteria;p__Pseudomonadota;c__Gammaproteobacteria;o__Burkholderiales;f__Burkholderiaceae_A;g__Aphodousia;s__Aphodousia secunda_B	blast	94.9	iPHoP-RF;51.70
contig002458	vOTU000911	GB_GCA_905212345.1	d__Bacteria;p__Pseudomonadota;c__Gammaproteobacteria;o__Burkholderiales;f__Burkholderiaceae_A;g__Aphodousia;s__Aphodousia sp905212345	blast	92.6	iPHoP-RF;61.10
contig002497	vOTU000924	RS_GCF_002000985.1	d__Bacteria;p__Bacillota;c__Bacilli;o__Lactobacillales;f__Streptococcaceae;g__Streptococcus;s__Streptococcus gallolyticus	CRISPR	98.8	blast;96.20 iPHoP-RF;73.50
contig002497	vOTU000924	GB_GCA_000283635.1	d__Bacteria;p__Bacillota;c__Bacilli;o__Lactobacillales;f__Streptococcaceae;g__Streptococcus;s__Streptococcus macedonicus	CRISPR	98.7	iPHoP-RF;82.20
contig002497	vOTU000924	RS_GCF_900475675.1	d__Bacteria;p__Bacillota;c__Bacilli;o__Lactobacillales;f__Streptococcaceae;g__Streptococcus;s__Streptococcus lutetiensis	CRISPR	98.4	blast;96.30 iPHoP-RF;90.10
contig002497	vOTU000924	RS_GCF_009738225.1	d__Bacteria;p__Bacillota;c__Bacilli;o__Lactobacillales;f__Streptococcaceae;g__Streptococcus;s__Streptococcus sp001556435	CRISPR	97.7	iPHoP-RF;77.10
contig002497	vOTU000924	RS_GCF_004843545.1	d__Bacteria;p__Bacillota;c__Bacilli;o__Lactobacillales;f__Streptococcaceae;g__Streptococcus;s__Streptococcus pasteurianus	blast	96.7	iPHoP-RF;80.00
contig002497	vOTU000924	RS_GCF_012277075.1	d__Bacteria;p__Bacillota;c__Bacilli;o__Lactobacillales;f__Streptococcaceae;g__Streptococcus;s__Streptococcus alactolyticus	CRISPR	96.4	None
contig002497	vOTU000924	GB_GCA_000344275.1	d__Bacteria;p__Bacillota;c__Bacilli;o__Lactobacillales;f__Streptococcaceae;g__Streptococcus;s__Streptococcus oralis_E	iPHoP-RF	93.4	None
contig002497	vOTU000924	RS_GCF_000380065.1	d__Bacteria;p__Bacillota;c__Bacilli;o__Lactobacillales;f__Streptococcaceae;g__Streptococcus;s__Streptococcus massiliensis	iPHoP-RF	93.1	None
contig002497	vOTU000924	GB_GCA_901875575.1	d__Bacteria;p__Bacillota;c__Bacilli;o__Lactobacillales;f__Streptococcaceae;g__Streptococcus;s__Streptococcus sp901875575	iPHoP-RF	92.8	None
contig002497	vOTU000924	RS_GCF_000279535.1	d__Bacteria;p__Bacillota;c__Bacilli;o__Lactobacillales;f__Streptococcaceae;g__Streptococcus;s__Streptococcus infantis_I	iPHoP-RF	92.4	None
contig002497	vOTU000924	RS_GCF_000259505.1	d__Bacteria;p__Bacillota;c__Bacilli;o__Lactobacillales;f__Streptococcaceae;g__Streptococcus;s__Streptococcus sp000259505	iPHoP-RF	92.1	None
contig002497	vOTU000924	RS_GCF_000154985.1	d__Bacteria;p__Bacillota;c__Bacilli;o__Lactobacillales;f__Streptococcaceae;g__Streptococcus;s__Streptococcus infantarius	blast	91.8	iPHoP-RF;89.80
contig002497	vOTU000924	RS_GCF_001697145.1	d__Bacteria;p__Bacillota;c__Bacilli;o__Lactobacillales;f__Streptococcaceae;g__Streptococcus;s__Streptococcus anginosus_C	iPHoP-RF	91.8	None
contig002497	vOTU000924	RS_GCF_021497965.1	d__Bacteria;p__Bacillota;c__Bacilli;o__Lactobacillales;f__Streptococcaceae;g__Streptococcus;s__Streptococcus infantis_B	iPHoP-RF	91.8	None
contig002497	vOTU000924	RS_GCF_023167545.1	d__Bacteria;p__Bacillota;c__Bacilli;o__Lactobacillales;f__Streptococcaceae;g__Streptococcus;s__Streptococcus constellatus	iPHoP-RF	91.8	None
contig002497	vOTU000924	RS_GCF_902167705.1	d__Bacteria;p__Bacillota;c__Bacilli;o__Lactobacillales;f__Streptococcaceae;g__Streptococcus;s__Streptococcus constellatus_A	iPHoP-RF	91.8	None
contig002497	vOTU000924	RS_GCF_000413475.1	d__Bacteria;p__Bacillota;c__Bacilli;o__Lactobacillales;f__Streptococcaceae;g__Streptococcus;s__Streptococcus intermedius	iPHoP-RF	91.4	None
contig002497	vOTU000924	RS_GCF_900636475.1	d__Bacteria;p__Bacillota;c__Bacilli;o__Lactobacillales;f__Streptococcaceae;g__Streptococcus;s__Streptococcus anginosus	iPHoP-RF	91.4	None
contig002497	vOTU000924	RS_GCF_001708305.1	d__Bacteria;p__Bacillota;c__Bacilli;o__Lactobacillales;f__Streptococcaceae;g__Streptococcus;s__Streptococcus himalayensis	iPHoP-RF	91.1	None
contig002497	vOTU000924	RS_GCF_900095845.1	d__Bacteria;p__Bacillota;c__Bacilli;o__Lactobacillales;f__Streptococcaceae;g__Streptococcus;s__Streptococcus timonensis	iPHoP-RF	90.8	None
contig002497	vOTU000924	GB_GCA_000223255.2	d__Bacteria;p__Bacillota;c__Bacilli;o__Lactobacillales;f__Streptococcaceae;g__Streptococcus;s__Streptococcus infantis_G	iPHoP-RF	90.5	None
contig002502	vOTU000926	MGYG000004078	d__Bacteria;p__Bacillota_A;c__Clostridia;o__TANB77;f__CAG-508;g__CAG-273;s__	blast	93.4	CRISPR;54.40
contig002516	vOTU000928	GB_GCA_900551445.1	d__Bacteria;p__Bacteroidota;c__Bacteroidia;o__Bacteroidales;f__Bacteroidaceae;g__Phocaeicola;s__Phocaeicola sp900551445	CRISPR	98.9	iPHoP-RF;96.40
contig002516	vOTU000928	RS_GCF_000187895.1	d__Bacteria;p__Bacteroidota;c__Bacteroidia;o__Bacteroidales;f__Bacteroidaceae;g__Phocaeicola;s__Phocaeicola plebeius	CRISPR	98.5	iPHoP-RF;95.10
contig002516	vOTU000928	RS_GCF_003437535.1	d__Bacteria;p__Bacteroidota;c__Bacteroidia;o__Bacteroidales;f__Bacteroidaceae;g__Phocaeicola;s__Phocaeicola plebeius_A	blast	98.2	CRISPR;97.30 iPHoP-RF;94.70
contig002516	vOTU000928	GB_GCA_900552075.1	d__Bacteria;p__Bacteroidota;c__Bacteroidia;o__Bacteroidales;f__Bacteroidaceae;g__Phocaeicola;s__Phocaeicola sp900552075	iPHoP-RF	96.4	None
contig002516	vOTU000928	RS_GCF_900128455.1	d__Bacteria;p__Bacteroidota;c__Bacteroidia;o__Bacteroidales;f__Bacteroidaceae;g__Phocaeicola;s__Phocaeicola mediterraneensis	iPHoP-RF	96.4	None
contig002516	vOTU000928	GB_GCA_902362595.1	d__Bacteria;p__Bacteroidota;c__Bacteroidia;o__Bacteroidales;f__Bacteroidaceae;g__Phocaeicola;s__Phocaeicola merdigallinarum	iPHoP-RF	95.4	None
contig002516	vOTU000928	GB_GCA_019416685.1	d__Bacteria;p__Bacteroidota;c__Bacteroidia;o__Bacteroidales;f__Bacteroidaceae;g__Bacteroides;s__Bacteroides sp900762525	iPHoP-RF	95.1	None
contig002516	vOTU000928	GB_GCA_000613465.1	d__Bacteria;p__Bacteroidota;c__Bacteroidia;o__Bacteroidales;f__Bacteroidaceae;g__Bacteroides;s__Bacteroides nordii	iPHoP-RF	94.1	None
contig002516	vOTU000928	RS_GCF_016900355.1	d__Bacteria;p__Bacteroidota;c__Bacteroidia;o__Bacteroidales;f__Bacteroidaceae;g__Phocaeicola;s__Phocaeicola sp900551065	iPHoP-RF	91.1	None
contig002516	vOTU000928	RS_GCF_000158035.1	d__Bacteria;p__Bacteroidota;c__Bacteroidia;o__Bacteroidales;f__Bacteroidaceae;g__Bacteroides;s__Bacteroides cellulosilyticus	CRISPR	90.4	iPHoP-RF;71.50
contig002528	vOTU000932	RS_GCF_016901735.1	d__Bacteria;p__Bacillota_A;c__Clostridia;o__Oscillospirales;f__Oscillospiraceae;g__Pseudoflavonifractor_A;s__Pseudoflavonifractor_A sp016901735	CRISPR	96.4	None
contig002528	vOTU000932	RS_GCF_000239295.1	d__Bacteria;p__Bacillota_A;c__Clostridia;o__Oscillospirales;f__Oscillospiraceae;g__Flavonifractor;s__Flavonifractor plautii	CRISPR	91.7	None
contig002537	vOTU000936	GB_GCA_900551445.1	d__Bacteria;p__Bacteroidota;c__Bacteroidia;o__Bacteroidales;f__Bacteroidaceae;g__Phocaeicola;s__Phocaeicola sp900551445	CRISPR	99	iPHoP-RF;92.40
contig002537	vOTU000936	GB_GCA_902362595.1	d__Bacteria;p__Bacteroidota;c__Bacteroidia;o__Bacteroidales;f__Bacteroidaceae;g__Phocaeicola;s__Phocaeicola merdigallinarum	CRISPR	99	iPHoP-RF;94.10
contig002537	vOTU000936	RS_GCF_000187895.1	d__Bacteria;p__Bacteroidota;c__Bacteroidia;o__Bacteroidales;f__Bacteroidaceae;g__Phocaeicola;s__Phocaeicola plebeius	CRISPR	99	blast;96.20 iPHoP-RF;92.40
contig002537	vOTU000936	RS_GCF_016900355.1	d__Bacteria;p__Bacteroidota;c__Bacteroidia;o__Bacteroidales;f__Bacteroidaceae;g__Phocaeicola;s__Phocaeicola sp900551065	CRISPR	99	iPHoP-RF;92.40
contig002537	vOTU000936	RS_GCF_003437535.1	d__Bacteria;p__Bacteroidota;c__Bacteroidia;o__Bacteroidales;f__Bacteroidaceae;g__Phocaeicola;s__Phocaeicola plebeius_A	CRISPR	98.9	blast;96.70 iPHoP-RF;84.80
contig002537	vOTU000936	RS_GCF_000154845.1	d__Bacteria;p__Bacteroidota;c__Bacteroidia;o__Bacteroidales;f__Bacteroidaceae;g__Phocaeicola;s__Phocaeicola coprocola	CRISPR	98.6	blast;96.90 iPHoP-RF;83.90
contig002537	vOTU000936	GB_GCA_000432735.1	d__Bacteria;p__Bacteroidota;c__Bacteroidia;o__Bacteroidales;f__Bacteroidaceae;g__Phocaeicola;s__Phocaeicola sp000432735	CRISPR	98.3	iPHoP-RF;78.50 blast;77.50
contig002537	vOTU000936	RS_GCF_002222615.2	d__Bacteria;p__Bacteroidota;c__Bacteroidia;o__Bacteroidales;f__Bacteroidaceae;g__Bacteroides;s__Bacteroides caccae	CRISPR	98.1	iPHoP-RF;80.80
contig002537	vOTU000936	RS_GCF_000374585.1	d__Bacteria;p__Bacteroidota;c__Bacteroidia;o__Bacteroidales;f__Bacteroidaceae;g__Phocaeicola;s__Phocaeicola barnesiae	CRISPR	97.9	iPHoP-RF;64.00
contig002537	vOTU000936	RS_GCF_000157915.1	d__Bacteria;p__Bacteroidota;c__Bacteroidia;o__Bacteroidales;f__Bacteroidaceae;g__Phocaeicola;s__Phocaeicola coprophilus	blast	96.7	iPHoP-RF;91.80
contig002537	vOTU000936	GB_GCA_900552075.1	d__Bacteria;p__Bacteroidota;c__Bacteroidia;o__Bacteroidales;f__Bacteroidaceae;g__Phocaeicola;s__Phocaeicola sp900552075	iPHoP-RF	94.1	None
contig002537	vOTU000936	GB_GCA_000436795.1	d__Bacteria;p__Bacteroidota;c__Bacteroidia;o__Bacteroidales;f__Bacteroidaceae;g__Phocaeicola;s__Phocaeicola sp000436795	iPHoP-RF	93.1	blast;89.70
contig002537	vOTU000936	GB_GCA_016900015.1	d__Bacteria;p__Bacteroidota;c__Bacteroidia;o__Bacteroidales;f__Bacteroidaceae;g__Phocaeicola_A;s__Phocaeicola_A sp003489705	iPHoP-RF	93.1	None
contig002537	vOTU000936	RS_GCF_900142015.1	d__Bacteria;p__Bacteroidota;c__Bacteroidia;o__Bacteroidales;f__Bacteroidaceae;g__Bacteroides;s__Bacteroides stercorirosoris	iPHoP-RF	91.8	None
contig002537	vOTU000936	RS_GCF_900128455.1	d__Bacteria;p__Bacteroidota;c__Bacteroidia;o__Bacteroidales;f__Bacteroidaceae;g__Phocaeicola;s__Phocaeicola mediterraneensis	iPHoP-RF	91.4	blast;86.70
contig002541	vOTU000939	GB_GCA_900545405.1	d__Bacteria;p__Bacillota_A;c__Clostridia;o__Oscillospirales;f__Oscillospiraceae;g__Scatomorpha;s__Scatomorpha sp900545405	blast	96.1	iPHoP-RF;72.80
contig002548	vOTU000943	GB_GCA_900755895.1	d__Bacteria;p__Bacillota_A;c__Clostridia;o__Oscillospirales;f__Acutalibacteraceae;g__Acutalibacter;s__Acutalibacter sp900755895	blast	91.7	None
contig002548	vOTU000943	RS_GCF_010509575.1	d__Bacteria;p__Bacillota_A;c__Clostridia;o__Oscillospirales;f__Ruminococcaceae;g__Faecalibacterium;s__Faecalibacterium duncaniae	blast	90.7	None
contig002552	vOTU000944	GB_GCA_002102825.1	d__Bacteria;p__Cyanobacteriota;c__Vampirovibrionia;o__Gastranaerophilales;f__Gastranaerophilaceae;g__Zag111;s__Zag111 sp002102825	blast	91.4	iPHoP-RF;53.60
contig002557	vOTU000946	GB_GCA_010604095.1	d__Bacteria;p__Bacillota;c__Bacilli;o__Lactobacillales;f__Streptococcaceae;g__Streptococcus;s__Streptococcus sp000187445	CRISPR	99.5	iPHoP-RF;96.40
contig002557	vOTU000946	RS_GCF_000785515.1	d__Bacteria;p__Bacillota;c__Bacilli;o__Lactobacillales;f__Streptococcaceae;g__Streptococcus;s__Streptococcus salivarius	CRISPR	99.5	iPHoP-RF;96.70
contig002557	vOTU000946	RS_GCF_004843545.1	d__Bacteria;p__Bacillota;c__Bacilli;o__Lactobacillales;f__Streptococcaceae;g__Streptococcus;s__Streptococcus pasteurianus	CRISPR	99.5	iPHoP-RF;85.70
contig002557	vOTU000946	RS_GCF_010120595.1	d__Bacteria;p__Bacillota;c__Bacilli;o__Lactobacillales;f__Streptococcaceae;g__Streptococcus;s__Streptococcus thermophilus	CRISPR	99.5	iPHoP-RF;94.70
contig002557	vOTU000946	RS_GCF_000154985.1	d__Bacteria;p__Bacillota;c__Bacilli;o__Lactobacillales;f__Streptococcaceae;g__Streptococcus;s__Streptococcus infantarius	CRISPR	99.4	iPHoP-RF;96.10
contig002557	vOTU000946	RS_GCF_000187265.1	d__Bacteria;p__Bacillota;c__Bacilli;o__Lactobacillales;f__Streptococcaceae;g__Streptococcus;s__Streptococcus equinus	CRISPR	99.4	iPHoP-RF;96.10
contig002557	vOTU000946	RS_GCF_900475675.1	d__Bacteria;p__Bacillota;c__Bacilli;o__Lactobacillales;f__Streptococcaceae;g__Streptococcus;s__Streptococcus lutetiensis	CRISPR	99.3	iPHoP-RF;97.10 blast;92.70
contig002557	vOTU000946	RS_GCF_012277075.1	d__Bacteria;p__Bacillota;c__Bacilli;o__Lactobacillales;f__Streptococcaceae;g__Streptococcus;s__Streptococcus alactolyticus	CRISPR	99	iPHoP-RF;81.90
contig002557	vOTU000946	RS_GCF_000188015.2	d__Bacteria;p__Bacillota;c__Bacilli;o__Lactobacillales;f__Streptococcaceae;g__Streptococcus;s__Streptococcus ictaluri	iPHoP-RF	97.1	None
contig002557	vOTU000946	RS_GCF_001885095.1	d__Bacteria;p__Bacillota;c__Bacilli;o__Lactobacillales;f__Streptococcaceae;g__Streptococcus;s__Streptococcus bovimastitidis	iPHoP-RF	97.1	None
contig002557	vOTU000946	RS_GCF_002887775.1	d__Bacteria;p__Bacillota;c__Bacilli;o__Lactobacillales;f__Streptococcaceae;g__Streptococcus;s__Streptococcus penaeicida	iPHoP-RF	97.1	None
contig002557	vOTU000946	RS_GCF_900101445.1	d__Bacteria;p__Bacillota;c__Bacilli;o__Lactobacillales;f__Streptococcaceae;g__Streptococcus;s__Streptococcus equinus_B	iPHoP-RF	97.1	None
contig002557	vOTU000946	RS_GCF_900636575.1	d__Bacteria;p__Bacillota;c__Bacilli;o__Lactobacillales;f__Streptococcaceae;g__Streptococcus;s__Streptococcus canis	iPHoP-RF	97.1	None
contig002557	vOTU000946	RS_GCF_000380145.1	d__Bacteria;p__Bacillota;c__Bacilli;o__Lactobacillales;f__Streptococcaceae;g__Streptococcus;s__Streptococcus thoraltensis	iPHoP-RF	96.7	None
contig002557	vOTU000946	RS_GCF_001302265.1	d__Bacteria;p__Bacillota;c__Bacilli;o__Lactobacillales;f__Streptococcaceae;g__Streptococcus;s__Streptococcus phocae	iPHoP-RF	96.7	None
contig002557	vOTU000946	RS_GCF_003674745.1	d__Bacteria;p__Bacillota;c__Bacilli;o__Lactobacillales;f__Streptococcaceae;g__Streptococcus;s__Streptococcus iniae	iPHoP-RF	96.7	None
contig002557	vOTU000946	RS_GCF_003686955.1	d__Bacteria;p__Bacillota;c__Bacilli;o__Lactobacillales;f__Streptococcaceae;g__Streptococcus;s__Streptococcus hillyeri	iPHoP-RF	96.7	None
contig002557	vOTU000946	RS_GCF_009738225.1	d__Bacteria;p__Bacillota;c__Bacilli;o__Lactobacillales;f__Streptococcaceae;g__Streptococcus;s__Streptococcus sp001556435	iPHoP-RF	96.7	None
contig002557	vOTU000946	RS_GCF_900459225.1	d__Bacteria;p__Bacillota;c__Bacilli;o__Lactobacillales;f__Streptococcaceae;g__Streptococcus;s__Streptococcus dysgalactiae	iPHoP-RF	96.7	None
contig002557	vOTU000946	RS_GCF_902729355.1	d__Bacteria;p__Bacillota;c__Bacilli;o__Lactobacillales;f__Streptococcaceae;g__Streptococcus;s__Streptococcus sp902729355	iPHoP-RF	96.7	None
contig002557	vOTU000946	RS_GCF_000423745.1	d__Bacteria;p__Bacillota;c__Bacilli;o__Lactobacillales;f__Streptococcaceae;g__Streptococcus;s__Streptococcus plurextorum	iPHoP-RF	96.4	None
contig002557	vOTU000946	RS_GCF_002055535.1	d__Bacteria;p__Bacillota;c__Bacilli;o__Lactobacillales;f__Streptococcaceae;g__Streptococcus;s__Streptococcus pyogenes	iPHoP-RF	96.4	None
contig002557	vOTU000946	RS_GCF_900475595.1	d__Bacteria;p__Bacillota;c__Bacilli;o__Lactobacillales;f__Streptococcaceae;g__Streptococcus;s__Streptococcus uberis	iPHoP-RF	96.4	None
contig002557	vOTU000946	GB_GCA_934229725.1	d__Bacteria;p__Bacillota;c__Bacilli;o__Lactobacillales;f__Streptococcaceae;g__Streptococcus;s__Streptococcus sp934229725	iPHoP-RF	96.1	None
contig002557	vOTU000946	RS_GCF_000380025.1	d__Bacteria;p__Bacillota;c__Bacilli;o__Lactobacillales;f__Streptococcaceae;g__Streptococcus;s__Streptococcus entericus	iPHoP-RF	96.1	None
contig002557	vOTU000946	RS_GCF_000425025.1	d__Bacteria;p__Bacillota;c__Bacilli;o__Lactobacillales;f__Streptococcaceae;g__Streptococcus;s__Streptococcus castoreus	iPHoP-RF	96.1	None
contig002557	vOTU000946	RS_GCF_002953735.1	d__Bacteria;p__Bacillota;c__Bacilli;o__Lactobacillales;f__Streptococcaceae;g__Streptococcus;s__Streptococcus pluranimalium	iPHoP-RF	96.1	None
contig002557	vOTU000946	RS_GCF_900459405.1	d__Bacteria;p__Bacillota;c__Bacilli;o__Lactobacillales;f__Streptococcaceae;g__Streptococcus;s__Streptococcus hyointestinalis	iPHoP-RF	96.1	None
contig002557	vOTU000946	GB_GCA_003521145.1	d__Bacteria;p__Bacillota;c__Bacilli;o__Lactobacillales;f__Streptococcaceae;g__Streptococcus;s__Streptococcus sp003521145	iPHoP-RF	95.7	None
contig002557	vOTU000946	RS_GCF_000186445.1	d__Bacteria;p__Bacillota;c__Bacilli;o__Lactobacillales;f__Streptococcaceae;g__Streptococcus;s__Streptococcus agalactiae	iPHoP-RF	95.7	None
contig002557	vOTU000946	RS_GCF_000376985.1	d__Bacteria;p__Bacillota;c__Bacilli;o__Lactobacillales;f__Streptococcaceae;g__Streptococcus;s__Streptococcus henryi	iPHoP-RF	95.7	None
contig002557	vOTU000946	RS_GCF_000379985.1	d__Bacteria;p__Bacillota;c__Bacilli;o__Lactobacillales;f__Streptococcaceae;g__Streptococcus;s__Streptococcus caballi	iPHoP-RF	95.7	None
contig002557	vOTU000946	RS_GCF_011039275.1	d__Bacteria;p__Bacillota;c__Bacilli;o__Lactobacillales;f__Streptococcaceae;g__Streptococcus;s__Streptococcus hyointestinalis_A	iPHoP-RF	95.7	None
contig002557	vOTU000946	RS_GCF_000423765.1	d__Bacteria;p__Bacillota;c__Bacilli;o__Lactobacillales;f__Streptococcaceae;g__Streptococcus;s__Streptococcus porci	iPHoP-RF	95.4	None
contig002557	vOTU000946	RS_GCF_024814375.1	d__Bacteria;p__Bacillota;c__Bacilli;o__Lactobacillales;f__Streptococcaceae;g__Streptococcus;s__Streptococcus sp024814375	iPHoP-RF	95.4	None
contig002557	vOTU000946	RS_GCF_016481305.1	d__Bacteria;p__Bacillota;c__Bacilli;o__Lactobacillales;f__Streptococcaceae;g__Streptococcus;s__Streptococcus pacificus	iPHoP-RF	95.1	None
contig002557	vOTU000946	RS_GCF_001598035.1	d__Bacteria;p__Bacillota;c__Bacilli;o__Lactobacillales;f__Streptococcaceae;g__Streptococcus;s__Streptococcus halotolerans	iPHoP-RF	94.7	None
contig002557	vOTU000946	RS_GCF_015594605.1	d__Bacteria;p__Bacillota;c__Bacilli;o__Lactobacillales;f__Streptococcaceae;g__Streptococcus;s__Streptococcus sp015594605	iPHoP-RF	94.7	None
contig002557	vOTU000946	GB_GCA_002436115.1	d__Bacteria;p__Bacillota;c__Bacilli;o__Lactobacillales;f__Streptococcaceae;g__Streptococcus;s__Streptococcus sp002436115	iPHoP-RF	94.4	None
contig002557	vOTU000946	GB_GCA_934196125.1	d__Bacteria;p__Bacillota;c__Bacilli;o__Lactobacillales;f__Streptococcaceae;g__Streptococcus;s__Streptococcus sp934196125	iPHoP-RF	94.4	None
contig002557	vOTU000946	GB_GCA_000283635.1	d__Bacteria;p__Bacillota;c__Bacilli;o__Lactobacillales;f__Streptococcaceae;g__Streptococcus;s__Streptococcus macedonicus	iPHoP-RF	94.1	None
contig002557	vOTU000946	RS_GCF_000380105.1	d__Bacteria;p__Bacillota;c__Bacilli;o__Lactobacillales;f__Streptococcaceae;g__Streptococcus;s__Streptococcus orisratti	iPHoP-RF	94.1	None
contig002557	vOTU000946	RS_GCF_003337175.1	d__Bacteria;p__Bacillota;c__Bacilli;o__Lactobacillales;f__Streptococcaceae;g__Streptococcus;s__Streptococcus gallolyticus_B	iPHoP-RF	93.7	None
contig002557	vOTU000946	RS_GCF_000380085.1	d__Bacteria;p__Bacillota;c__Bacilli;o__Lactobacillales;f__Streptococcaceae;g__Streptococcus;s__Streptococcus merionis	iPHoP-RF	93.4	None
contig002557	vOTU000946	RS_GCF_012396585.1	d__Bacteria;p__Bacillota;c__Bacilli;o__Lactobacillales;f__Streptococcaceae;g__Streptococcus;s__Streptococcus ovuberis	iPHoP-RF	93.4	None
contig002557	vOTU000946	RS_GCF_001578885.1	d__Bacteria;p__Bacillota;c__Bacilli;o__Lactobacillales;f__Streptococcaceae;g__Streptococcus;s__Streptococcus sp001578885	iPHoP-RF	92.8	None
contig002557	vOTU000946	RS_GCF_016908655.1	d__Bacteria;p__Bacillota;c__Bacilli;o__Lactobacillales;f__Streptococcaceae;g__Streptococcus;s__Streptococcus saliviloxodontae	iPHoP-RF	92.4	None
contig002557	vOTU000946	RS_GCF_016461705.1	d__Bacteria;p__Bacillota;c__Bacilli;o__Lactobacillales;f__Streptococcaceae;g__Streptococcus;s__Streptococcus vicugnae	iPHoP-RF	92.1	None
contig002572	vOTU000952	GB_GCA_905221505.1	d__Bacteria;p__Bacillota;c__Bacilli;o__Lactobacillales;f__Streptococcaceae;g__Streptococcus;s__Streptococcus sp905221505	CRISPR	98.9	iPHoP-RF;67.70
contig002572	vOTU000952	RS_GCF_002096835.1	d__Bacteria;p__Bacillota;c__Bacilli;o__Lactobacillales;f__Streptococcaceae;g__Streptococcus;s__Streptococcus mitis_W	CRISPR	98.9	iPHoP-RF;68.90
contig002572	vOTU000952	RS_GCF_019929345.1	d__Bacteria;p__Bacillota;c__Bacilli;o__Lactobacillales;f__Streptococcaceae;g__Streptococcus;s__Streptococcus sp015256435	CRISPR	98.9	iPHoP-RF;71.10
contig002572	vOTU000952	RS_GCF_004843545.1	d__Bacteria;p__Bacillota;c__Bacilli;o__Lactobacillales;f__Streptococcaceae;g__Streptococcus;s__Streptococcus pasteurianus	CRISPR	98.7	blast;92.80 iPHoP-RF;71.30
contig002572	vOTU000952	RS_GCF_900475675.1	d__Bacteria;p__Bacillota;c__Bacilli;o__Lactobacillales;f__Streptococcaceae;g__Streptococcus;s__Streptococcus lutetiensis	CRISPR	98.7	blast;90.70 iPHoP-RF;84.50
contig002572	vOTU000952	GB_GCA_934196125.1	d__Bacteria;p__Bacillota;c__Bacilli;o__Lactobacillales;f__Streptococcaceae;g__Streptococcus;s__Streptococcus sp934196125	CRISPR	98.5	blast;89.60 iPHoP-RF;72.20
contig002572	vOTU000952	RS_GCF_012277075.1	d__Bacteria;p__Bacillota;c__Bacilli;o__Lactobacillales;f__Streptococcaceae;g__Streptococcus;s__Streptococcus alactolyticus	blast	92.3	iPHoP-RF;85.40 CRISPR;77.90
contig002574	vOTU000953	GB_GCA_900547035.1	d__Bacteria;p__Bacillota_A;c__Clostridia;o__Lachnospirales;f__Lachnospiraceae;g__Enterocloster;s__Enterocloster excrementigallinarum	CRISPR	99	blast;89.40 iPHoP-RF;85.70
contig002574	vOTU000953	GB_GCA_904395885.1	d__Bacteria;p__Bacillota_A;c__Clostridia;o__Lachnospirales;f__Lachnospiraceae;g__UMGS1370;s__UMGS1370 sp904395885	CRISPR	97.4	iPHoP-RF;90.10 blast;87.60
contig002574	vOTU000953	GB_GCA_018715905.1	d__Bacteria;p__Bacillota_A;c__Clostridia;o__Lachnospirales;f__Lachnospiraceae;g__Caccovicinus;s__Caccovicinus merdipullorum	CRISPR	95.7	iPHoP-RF;92.10 blast;89.50
contig002574	vOTU000953	GB_GCA_019114465.1	d__Bacteria;p__Bacillota_A;c__Clostridia;o__Lachnospirales;f__Lachnospiraceae;g__Lachnoclostridium_A;s__Lachnoclostridium_A avicola	CRISPR	92.3	iPHoP-RF;88.20
contig002574	vOTU000953	GB_GCA_025149285.1	d__Bacteria;p__Bacillota_A;c__Clostridia;o__Lachnospirales;f__Lachnospiraceae;g__Hungatella;s__Hungatella hathewayi	iPHoP-RF	92.1	None
contig002574	vOTU000953	RS_GCF_002160755.1	d__Bacteria;p__Bacillota_A;c__Clostridia;o__Lachnospirales;f__Lachnospiraceae;g__Lachnoclostridium_A;s__Lachnoclostridium_A sp002160755	iPHoP-RF	92.1	blast;91.70
contig002574	vOTU000953	GB_GCA_018713255.1	d__Bacteria;p__Bacillota_A;c__Clostridia;o__Lachnospirales;f__Lachnospiraceae;g__Caccovicinus;s__Caccovicinus excrementipullorum	iPHoP-RF	91.4	blast;91.20
contig002574	vOTU000953	GB_GCA_019114305.1	d__Bacteria;p__Bacillota_A;c__Clostridia;o__Lachnospirales;f__Lachnospiraceae;g__Hungatella_B;s__Hungatella_B pullicola	iPHoP-RF	91.1	blast;78.60
contig002574	vOTU000953	GB_GCA_017889125.1	d__Bacteria;p__Bacillota_A;c__Clostridia;o__Lachnospirales;f__Lachnospiraceae;g__Caccovicinus;s__Caccovicinus sp017889125	iPHoP-RF	90.8	None
contig002579	vOTU000954	GB_GCA_019113005.1	d__Bacteria;p__Bacillota_A;c__Clostridia;o__Oscillospirales;f__Butyricicoccaceae;g__Butyricicoccus;s__Butyricicoccus avistercoris	blast	91.7	None
contig002587	vOTU000958	RS_GCF_000154985.1	d__Bacteria;p__Bacillota;c__Bacilli;o__Lactobacillales;f__Streptococcaceae;g__Streptococcus;s__Streptococcus infantarius	CRISPR	99.6	blast;96.30 iPHoP-RF;80.60
contig002587	vOTU000958	RS_GCF_003943515.1	d__Bacteria;p__Bacillota;c__Bacilli;o__Lactobacillales;f__Streptococcaceae;g__Streptococcus;s__Streptococcus cristatus_D	CRISPR	99.6	iPHoP-RF;68.60
contig002587	vOTU000958	RS_GCF_010120595.1	d__Bacteria;p__Bacillota;c__Bacilli;o__Lactobacillales;f__Streptococcaceae;g__Streptococcus;s__Streptococcus thermophilus	CRISPR	99.6	None
contig002587	vOTU000958	RS_GCF_022354845.1	d__Bacteria;p__Bacillota;c__Bacilli;o__Lactobacillales;f__Streptococcaceae;g__Streptococcus;s__Streptococcus suis_AA	CRISPR	99.6	None
contig002587	vOTU000958	RS_GCF_900459405.1	d__Bacteria;p__Bacillota;c__Bacilli;o__Lactobacillales;f__Streptococcaceae;g__Streptococcus;s__Streptococcus hyointestinalis	CRISPR	99.6	None
contig002587	vOTU000958	GB_GCA_000283635.1	d__Bacteria;p__Bacillota;c__Bacilli;o__Lactobacillales;f__Streptococcaceae;g__Streptococcus;s__Streptococcus macedonicus	CRISPR	99.5	iPHoP-RF;67.00
contig002587	vOTU000958	RS_GCF_000187265.1	d__Bacteria;p__Bacillota;c__Bacilli;o__Lactobacillales;f__Streptococcaceae;g__Streptococcus;s__Streptococcus equinus	CRISPR	99.5	iPHoP-RF;66.30
contig002587	vOTU000958	RS_GCF_002000985.1	d__Bacteria;p__Bacillota;c__Bacilli;o__Lactobacillales;f__Streptococcaceae;g__Streptococcus;s__Streptococcus gallolyticus	CRISPR	99.5	blast;95.60 iPHoP-RF;67.00
contig002587	vOTU000958	RS_GCF_004843545.1	d__Bacteria;p__Bacillota;c__Bacilli;o__Lactobacillales;f__Streptococcaceae;g__Streptococcus;s__Streptococcus pasteurianus	CRISPR	99.5	blast;96.50 iPHoP-RF;66.50
contig002587	vOTU000958	RS_GCF_900475675.1	d__Bacteria;p__Bacillota;c__Bacilli;o__Lactobacillales;f__Streptococcaceae;g__Streptococcus;s__Streptococcus lutetiensis	CRISPR	99.5	blast;96.00 iPHoP-RF;77.80
contig002587	vOTU000958	RS_GCF_012277075.1	d__Bacteria;p__Bacillota;c__Bacilli;o__Lactobacillales;f__Streptococcaceae;g__Streptococcus;s__Streptococcus alactolyticus	CRISPR	99	blast;91.40 iPHoP-RF;73.00
contig002587	vOTU000958	RS_GCF_900101445.1	d__Bacteria;p__Bacillota;c__Bacilli;o__Lactobacillales;f__Streptococcaceae;g__Streptococcus;s__Streptococcus equinus_B	blast	94	iPHoP-RF;77.80
contig002591	vOTU000959	GB_GCA_018713375.1	d__Bacteria;p__Bacillota_A;c__Clostridia;o__Oscillospirales;f__Oscillospiraceae;g__Scatomorpha;s__Scatomorpha stercorigallinarum	CRISPR	95.2	iPHoP-RF;80.80
contig002591	vOTU000959	GB_GCA_944385805.1	d__Bacteria;p__Bacillota_A;c__Clostridia;o__Oscillospirales;f__Oscillospiraceae;g__Scatomorpha;s__Scatomorpha sp944385805	iPHoP-RF	94.4	None
contig002591	vOTU000959	GB_GCA_900544765.1	d__Bacteria;p__Bacillota_A;c__Clostridia;o__Oscillospirales;f__Oscillospiraceae;g__Scatomorpha;s__Scatomorpha gallistercoris	iPHoP-RF	93.4	None
contig002591	vOTU000959	GB_GCA_018712985.1	d__Bacteria;p__Bacillota_A;c__Clostridia;o__Oscillospirales;f__Oscillospiraceae;g__Scatomorpha;s__Scatomorpha intestinavium	blast	92	iPHoP-RF;91.10
contig002591	vOTU000959	GB_GCA_930990965.1	d__Bacteria;p__Bacillota_A;c__Clostridia;o__Oscillospirales;f__Oscillospiraceae;g__Scatomorpha;s__Scatomorpha merdigallinarum	iPHoP-RF	91.8	None
contig002591	vOTU000959	GB_GCA_944385795.1	d__Bacteria;p__Bacillota_A;c__Clostridia;o__Oscillospirales;f__Oscillospiraceae;g__Scatomorpha;s__Scatomorpha sp944385795	iPHoP-RF	91.8	None
contig002591	vOTU000959	GB_GCA_944385815.1	d__Bacteria;p__Bacillota_A;c__Clostridia;o__Oscillospirales;f__Oscillospiraceae;g__Scatomorpha;s__Scatomorpha sp944385815	iPHoP-RF	91.8	None
contig002591	vOTU000959	GB_GCA_944387825.1	d__Bacteria;p__Bacillota_A;c__Clostridia;o__Oscillospirales;f__Oscillospiraceae;g__Scatomorpha;s__Scatomorpha sp944387825	iPHoP-RF	91.8	None
contig002591	vOTU000959	GB_GCA_900752445.1	d__Bacteria;p__Bacillota_A;c__Clostridia;o__Oscillospirales;f__Oscillospiraceae;g__Scatomorpha;s__Scatomorpha sp900752445	iPHoP-RF	90.1	None
contig002596	vOTU000963	GB_GCA_900541395.1	d__Bacteria;p__Desulfobacterota;c__Desulfovibrionia;o__Desulfovibrionales;f__Desulfovibrionaceae;g__Mailhella;s__Mailhella merdigallinarum	blast	93.9	iPHoP-RF;80.60
contig002596	vOTU000963	GB_GCA_019119045.1	d__Bacteria;p__Desulfobacterota;c__Desulfovibrionia;o__Desulfovibrionales;f__Desulfovibrionaceae;g__Mailhella;s__Mailhella merdavium	blast	91.9	iPHoP-RF;83.90
contig002618	vOTU000971	GB_GCA_910589315.1	d__Bacteria;p__Bacillota_A;c__Clostridia;o__Oscillospirales;f__Oscillospiraceae;g__Dysosmobacter;s__Dysosmobacter sp910589315	blast	92.5	iPHoP-RF;81.40
contig002632	vOTU000976	RS_GCF_013009555.1	d__Bacteria;p__Bacteroidota;c__Bacteroidia;o__Bacteroidales;f__Bacteroidaceae;g__Phocaeicola;s__Phocaeicola dorei	blast	90.7	None
contig002632	vOTU000976	RS_GCF_000012825.1	d__Bacteria;p__Bacteroidota;c__Bacteroidia;o__Bacteroidales;f__Bacteroidaceae;g__Phocaeicola;s__Phocaeicola vulgatus	blast	90.5	None
contig002645	vOTU000984	GB_GCA_900555215.1	d__Bacteria;p__Bacillota_A;c__Clostridia;o__Lachnospirales;f__Lachnospiraceae;g__Mediterraneibacter;s__Mediterraneibacter excrementipullorum	blast	92.4	iPHoP-RF;60.30
contig002645	vOTU000984	GB_GCA_904418845.1	d__Bacteria;p__Bacillota_A;c__Clostridia;o__Lachnospirales;f__Lachnospiraceae;g__Mediterraneibacter;s__Mediterraneibacter sp904418845	blast	90.2	iPHoP-RF;68.40
contig002660	vOTU000990	RS_GCF_012277075.1	d__Bacteria;p__Bacillota;c__Bacilli;o__Lactobacillales;f__Streptococcaceae;g__Streptococcus;s__Streptococcus alactolyticus	blast	96.3	iPHoP-RF;58.40
contig002660	vOTU000990	RS_GCF_900475675.1	d__Bacteria;p__Bacillota;c__Bacilli;o__Lactobacillales;f__Streptococcaceae;g__Streptococcus;s__Streptococcus lutetiensis	blast	96.2	iPHoP-RF;64.50
contig002660	vOTU000990	RS_GCF_004843545.1	d__Bacteria;p__Bacillota;c__Bacilli;o__Lactobacillales;f__Streptococcaceae;g__Streptococcus;s__Streptococcus pasteurianus	blast	95.5	iPHoP-RF;79.00
contig002660	vOTU000990	RS_GCF_000154985.1	d__Bacteria;p__Bacillota;c__Bacilli;o__Lactobacillales;f__Streptococcaceae;g__Streptococcus;s__Streptococcus infantarius	blast	91.7	iPHoP-RF;55.70
contig002660	vOTU000990	GB_GCA_000430305.1	d__Bacteria;p__Bacillota;c__Bacilli;o__Lactobacillales;f__Streptococcaceae;g__Streptococcus;s__Streptococcus mitis_AW	iPHoP-RF	91.1	None
contig002660	vOTU000990	RS_GCF_001810785.1	d__Bacteria;p__Bacillota;c__Bacilli;o__Lactobacillales;f__Streptococcaceae;g__Streptococcus;s__Streptococcus sp001810785	iPHoP-RF	90.8	None
contig002660	vOTU000990	RS_GCF_019794555.1	d__Bacteria;p__Bacillota;c__Bacilli;o__Lactobacillales;f__Streptococcaceae;g__Streptococcus;s__Streptococcus suis_AB	blast	90.1	iPHoP-RF;82.20
contig002660	vOTU000990	RS_GCF_900411395.1	d__Bacteria;p__Bacillota;c__Bacilli;o__Lactobacillales;f__Streptococcaceae;g__Streptococcus;s__Streptococcus mitis_BA	iPHoP-RF	90.1	None
contig002673	vOTU000994	GB_GCA_905187815.1	d__Archaea;p__Thermoplasmatota;c__Thermoplasmata;o__Methanomassiliicoccales;f__Methanomethylophilaceae;g__UBA71;s__UBA71 sp905187815	CRISPR	97.6	iPHoP-RF;78.00
contig002673	vOTU000994	GB_GCA_944320485.1	d__Archaea;p__Thermoplasmatota;c__Thermoplasmata;o__Methanomassiliicoccales;f__Methanomethylophilaceae;g__UBA71;s__UBA71 sp944320485	CRISPR	97.5	iPHoP-RF;86.30
contig002673	vOTU000994	GB_GCA_009911715.1	d__Archaea;p__Thermoplasmatota;c__Thermoplasmata;o__Methanomassiliicoccales;f__Methanomethylophilaceae;g__UBA71;s__UBA71 sp006954425	CRISPR	96.6	iPHoP-RF;82.20
contig002673	vOTU000994	GB_GCA_002506905.1	d__Archaea;p__Thermoplasmatota;c__Thermoplasmata;o__Methanomassiliicoccales;f__Methanomethylophilaceae;g__Methanogranum;s__Methanogranum sp002506905	CRISPR	96.5	iPHoP-RF;54.10
contig002673	vOTU000994	GB_GCA_945492685.1	d__Archaea;p__Thermoplasmatota;c__Thermoplasmata;o__Methanomassiliicoccales;f__Methanomethylophilaceae;g__UBA71;s__UBA71 sp945492685	iPHoP-RF	90.8	None
contig002674	vOTU000995	GB_GCA_944327285.1	d__Bacteria;p__Desulfobacterota;c__Desulfovibrionia;o__Desulfovibrionales;f__Desulfovibrionaceae;g__Desulfovibrio;s__Desulfovibrio sp944327285	blast	94.7	iPHoP-RF;84.80
contig002674	vOTU000995	GB_GCA_945871415.1	d__Bacteria;p__Desulfobacterota;c__Desulfovibrionia;o__Desulfovibrionales;f__Desulfovibrionaceae;g__Desulfovibrio;s__Desulfovibrio sp945871415	blast	93.3	iPHoP-RF;87.00
contig002674	vOTU000995	GB_GCA_905215675.1	d__Bacteria;p__Desulfobacterota;c__Desulfovibrionia;o__Desulfovibrionales;f__Desulfovibrionaceae;g__Desulfovibrio;s__Desulfovibrio sp905215675	blast	90.7	iPHoP-RF;85.40
contig002680	vOTU128307	GB_GCA_900544635.1	d__Bacteria;p__Synergistota;c__Synergistia;o__Synergistales;f__Synergistaceae;g__Caccocola;s__Caccocola faecigallinarum	blast	98.6	None
contig002680	vOTU128307	GB_GCA_018716365.1	d__Bacteria;p__Synergistota;c__Synergistia;o__Synergistales;f__Synergistaceae;g__Caccocola;s__Caccocola faecipullorum	blast	95.9	None
contig002680	vOTU128307	RS_GCF_002159945.1	d__Bacteria;p__Synergistota;c__Synergistia;o__Synergistales;f__Synergistaceae;g__Caccocola;s__Caccocola sp002159945	blast	91.3	None
contig002686	vOTU001001	GB_GCA_904418845.1	d__Bacteria;p__Bacillota_A;c__Clostridia;o__Lachnospirales;f__Lachnospiraceae;g__Mediterraneibacter;s__Mediterraneibacter sp904418845	blast	92.1	iPHoP-RF;86.30
contig002686	vOTU001001	GB_GCA_019119265.1	d__Bacteria;p__Bacillota_A;c__Clostridia;o__Lachnospirales;f__Lachnospiraceae;g__Mediterraneibacter;s__Mediterraneibacter intestinigallinarum	blast	91	iPHoP-RF;79.80
contig002686	vOTU001001	GB_GCA_019119745.1	d__Bacteria;p__Bacillota_A;c__Clostridia;o__Lachnospirales;f__Lachnospiraceae;g__Mediterraneibacter;s__Mediterraneibacter gallistercoris	blast	90.6	iPHoP-RF;65.80
contig002686	vOTU001001	GB_GCA_944381935.1	d__Bacteria;p__Bacillota_A;c__Clostridia;o__Lachnospirales;f__Lachnospiraceae;g__Mediterraneibacter;s__Mediterraneibacter sp944381935	blast	90	iPHoP-RF;79.30
contig002687	vOTU001002	GB_GCA_944387035.1	d__Bacteria;p__Bacillota_A;c__Clostridia;o__Oscillospirales;f__Oscillospiraceae;g__Dysosmobacter;s__Dysosmobacter sp944387035	blast	93.9	iPHoP-RF;78.00
contig002687	vOTU001002	GB_GCA_900551885.1	d__Bacteria;p__Bacillota_A;c__Clostridia;o__Oscillospirales;f__Oscillospiraceae;g__Dysosmobacter;s__Dysosmobacter sp900551885	blast	92.4	iPHoP-RF;74.80
contig002687	vOTU001002	GB_GCA_000436875.1	d__Bacteria;p__Bacillota_A;c__Clostridia;o__Oscillospirales;f__Oscillospiraceae;g__Dysosmobacter;s__Dysosmobacter sp000436875	blast	92	iPHoP-RF;66.80
contig002687	vOTU001002	GB_GCA_944387015.1	d__Bacteria;p__Bacillota_A;c__Clostridia;o__Oscillospirales;f__Oscillospiraceae;g__Dysosmobacter;s__Dysosmobacter sp944387015	blast	92	iPHoP-RF;72.20
contig002687	vOTU001002	GB_GCA_905200545.1	d__Bacteria;p__Bacillota_A;c__Clostridia;o__Oscillospirales;f__Oscillospiraceae;g__Dysosmobacter;s__Dysosmobacter sp905200545	blast	91.4	iPHoP-RF;71.70
contig002693	vOTU001005	GB_GCA_003512525.1	d__Bacteria;p__Bacillota_A;c__Clostridia;o__Oscillospirales;f__Ruminococcaceae;g__Ruminiclostridium_E;s__Ruminiclostridium_E sp003512525	CRISPR	98.7	None
contig002693	vOTU001005	RS_GCF_016900655.1	d__Bacteria;p__Bacillota_A;c__Clostridia;o__Lachnospirales;f__Lachnospiraceae;g__Sellimonas;s__Sellimonas avistercoris	blast	91.8	None
contig002696	vOTU001008	RS_GCF_005121165.3	d__Bacteria;p__Bacillota_A;c__Clostridia;o__Oscillospirales;f__Oscillospiraceae;g__Dysosmobacter;s__Dysosmobacter welbionis	blast	91.7	None
contig002703	vOTU001012	RS_GCF_900459405.1	d__Bacteria;p__Bacillota;c__Bacilli;o__Lactobacillales;f__Streptococcaceae;g__Streptococcus;s__Streptococcus hyointestinalis	CRISPR	99.5	iPHoP-RF;73.70
contig002703	vOTU001012	GB_GCA_000283635.1	d__Bacteria;p__Bacillota;c__Bacilli;o__Lactobacillales;f__Streptococcaceae;g__Streptococcus;s__Streptococcus macedonicus	CRISPR	99.4	iPHoP-RF;73.20
contig002703	vOTU001012	GB_GCA_010604095.1	d__Bacteria;p__Bacillota;c__Bacilli;o__Lactobacillales;f__Streptococcaceae;g__Streptococcus;s__Streptococcus sp000187445	CRISPR	99.4	iPHoP-RF;94.10
contig002703	vOTU001012	RS_GCF_000187265.1	d__Bacteria;p__Bacillota;c__Bacilli;o__Lactobacillales;f__Streptococcaceae;g__Streptococcus;s__Streptococcus equinus	CRISPR	99.4	iPHoP-RF;80.30
contig002703	vOTU001012	RS_GCF_000785515.1	d__Bacteria;p__Bacillota;c__Bacilli;o__Lactobacillales;f__Streptococcaceae;g__Streptococcus;s__Streptococcus salivarius	CRISPR	99.4	blast;96.10 iPHoP-RF;92.80
contig002703	vOTU001012	RS_GCF_002000985.1	d__Bacteria;p__Bacillota;c__Bacilli;o__Lactobacillales;f__Streptococcaceae;g__Streptococcus;s__Streptococcus gallolyticus	CRISPR	99.4	iPHoP-RF;78.30
contig002703	vOTU001012	RS_GCF_009738225.1	d__Bacteria;p__Bacillota;c__Bacilli;o__Lactobacillales;f__Streptococcaceae;g__Streptococcus;s__Streptococcus sp001556435	CRISPR	99.4	blast;92.20 iPHoP-RF;92.10
contig002703	vOTU001012	RS_GCF_010120595.1	d__Bacteria;p__Bacillota;c__Bacilli;o__Lactobacillales;f__Streptococcaceae;g__Streptococcus;s__Streptococcus thermophilus	CRISPR	99.4	iPHoP-RF;91.80
contig002703	vOTU001012	RS_GCF_000154985.1	d__Bacteria;p__Bacillota;c__Bacilli;o__Lactobacillales;f__Streptococcaceae;g__Streptococcus;s__Streptococcus infantarius	CRISPR	99.3	iPHoP-RF;82.80
contig002703	vOTU001012	RS_GCF_900475675.1	d__Bacteria;p__Bacillota;c__Bacilli;o__Lactobacillales;f__Streptococcaceae;g__Streptococcus;s__Streptococcus lutetiensis	CRISPR	99.3	iPHoP-RF;93.70 blast;93.60
contig002703	vOTU001012	RS_GCF_012277075.1	d__Bacteria;p__Bacillota;c__Bacilli;o__Lactobacillales;f__Streptococcaceae;g__Streptococcus;s__Streptococcus alactolyticus	CRISPR	99.2	None
contig002703	vOTU001012	GB_GCA_003521145.1	d__Bacteria;p__Bacillota;c__Bacilli;o__Lactobacillales;f__Streptococcaceae;g__Streptococcus;s__Streptococcus sp003521145	iPHoP-RF	92.4	None
contig002703	vOTU001012	RS_GCF_000188295.1	d__Bacteria;p__Bacillota;c__Bacilli;o__Lactobacillales;f__Streptococcaceae;g__Streptococcus;s__Streptococcus vestibularis	iPHoP-RF	92.4	None
contig002703	vOTU001012	RS_GCF_000188055.2	d__Bacteria;p__Bacillota;c__Bacilli;o__Lactobacillales;f__Streptococcaceae;g__Streptococcus;s__Streptococcus urinalis	blast	91.7	iPHoP-RF;87.00
contig002710	vOTU001016	GB_GCA_001917135.1	d__Bacteria;p__Pseudomonadota;c__Alphaproteobacteria;o__RF32;f__CAG-239;g__CAG-267;s__CAG-267 sp001917135	blast	96.2	iPHoP-RF;88.20
contig002710	vOTU001016	GB_GCA_900551865.1	d__Bacteria;p__Pseudomonadota;c__Alphaproteobacteria;o__RF32;f__CAG-239;g__CAG-267;s__CAG-267 sp900551865	blast	93.3	iPHoP-RF;87.60
contig002713	vOTU001018	GB_GCA_019116585.1	d__Bacteria;p__Bacillota_A;c__Clostridia;o__Oscillospirales;f__Ruminococcaceae;g__Faecalibacterium;s__Faecalibacterium gallistercoris	CRISPR	92.2	blast;89.10 iPHoP-RF;59.20
contig002713	vOTU001018	RS_GCF_022180365.1	d__Bacteria;p__Bacillota_A;c__Clostridia;o__Oscillospirales;f__Ruminococcaceae;g__Faecalibacterium;s__Faecalibacterium gallinarum	blast	92.1	iPHoP-RF;81.90
contig002713	vOTU001018	GB_GCA_944387955.1	d__Bacteria;p__Bacillota_A;c__Clostridia;o__Oscillospirales;f__Ruminococcaceae;g__Faecalibacterium;s__Faecalibacterium sp944387955	blast	92	iPHoP-RF;62.70
contig002713	vOTU001018	RS_GCF_002160895.1	d__Bacteria;p__Bacillota_A;c__Clostridia;o__Oscillospirales;f__Ruminococcaceae;g__Faecalibacterium;s__Faecalibacterium sp002160895	blast	91.6	iPHoP-RF;68.90
contig002713	vOTU001018	GB_GCA_900539945.1	d__Bacteria;p__Bacillota_A;c__Clostridia;o__Oscillospirales;f__Ruminococcaceae;g__Faecalibacterium;s__Faecalibacterium sp900539945	blast	91.2	iPHoP-RF;84.20
contig002713	vOTU001018	RS_GCF_023347235.1	d__Bacteria;p__Bacillota_A;c__Clostridia;o__Oscillospirales;f__Ruminococcaceae;g__Faecalibacterium;s__Faecalibacterium prausnitzii_A	blast	90.5	iPHoP-RF;75.20
contig002719	vOTU001020	GB_GCA_900540045.1	d__Bacteria;p__Bacillota_A;c__Clostridia;o__Christensenellales;f__CAG-74;g__Limiplasma;s__Limiplasma merdipullorum	CRISPR	98.9	blast;93.70 iPHoP-RF;83.10
contig002719	vOTU001020	GB_GCA_900553905.1	d__Bacteria;p__Bacillota_A;c__Clostridia;o__Christensenellales;f__CAG-74;g__Limiplasma;s__Limiplasma pullistercoris	CRISPR	98.9	iPHoP-RF;71.50
contig002719	vOTU001020	GB_GCA_944349545.1	d__Bacteria;p__Bacillota_A;c__Clostridia;o__Christensenellales;f__CAG-74;g__Limiplasma;s__Limiplasma sp944349545	CRISPR	98.9	iPHoP-RF;68.40
contig002719	vOTU001020	GB_GCA_018715175.1	d__Bacteria;p__Bacillota_A;c__Clostridia;o__Christensenellales;f__CAG-74;g__Limiplasma;s__Limiplasma stercoravium	CRISPR	98.6	iPHoP-RF;77.80
contig002721	vOTU001021	GB_GCA_019114345.1	d__Bacteria;p__Bacillota_A;c__Clostridia;o__Oscillospirales;f__Butyricicoccaceae;g__Agathobaculum;s__Agathobaculum pullistercoris	blast	98.9	iPHoP-RF;92.80
contig002721	vOTU001021	GB_GCA_900555465.1	d__Bacteria;p__Bacillota_A;c__Clostridia;o__Oscillospirales;f__Butyricicoccaceae;g__Agathobaculum;s__Agathobaculum intestinigallinarum	CRISPR	98.1	iPHoP-RF;50.70
contig002723	vOTU001022	GB_GCA_003149915.1	d__Bacteria;p__Bacillota;c__Bacilli;o__RF39;f__UBA660;g__Faecenecus;s__Faecenecus gallistercoris	blast	91.7	iPHoP-RF;69.50
contig002733	vOTU001027	GB_GCA_934121875.1	d__Bacteria;p__Bacillota_A;c__Clostridia;o__TANB77;f__CAG-508;g__CAG-273;s__CAG-273 sp934121875	blast	92.7	iPHoP-RF;68.60
contig002733	vOTU001027	MGYG000313399	d__Bacteria;p__Bacillota_A;c__Clostridia;o__TANB77;f__CAG-508;g__UMGS1864;s__	blast	90.6	iPHoP-RF;64.50
contig002754	vOTU001036	GB_GCA_000434235.1	d__Bacteria;p__Bacteroidota;c__Bacteroidia;o__Bacteroidales;f__Rikenellaceae;g__Alistipes;s__Alistipes avistercoris	CRISPR	97.8	iPHoP-RF;51.20
contig002754	vOTU001036	RS_GCF_000154465.1	d__Bacteria;p__Bacteroidota;c__Bacteroidia;o__Bacteroidales;f__Rikenellaceae;g__Alistipes;s__Alistipes putredinis	CRISPR	97.8	iPHoP-RF;50.70
contig002754	vOTU001036	GB_GCA_025145845.1	d__Bacteria;p__Bacteroidota;c__Bacteroidia;o__Bacteroidales;f__Rikenellaceae;g__Alistipes;s__Alistipes shahii	CRISPR	97.1	iPHoP-RF;54.90
contig002754	vOTU001036	RS_GCF_000016525.1	d__Archaea;p__Methanobacteriota;c__Methanobacteria;o__Methanobacteriales;f__Methanobacteriaceae;g__Methanobrevibacter_A;s__Methanobrevibacter_A smithii	blast	92.4	iPHoP-RF;61.90
contig002757	vOTU001037	GB_GCA_900539945.1	d__Bacteria;p__Bacillota_A;c__Clostridia;o__Oscillospirales;f__Ruminococcaceae;g__Faecalibacterium;s__Faecalibacterium sp900539945	blast	91	None
contig002757	vOTU001037	GB_GCA_934525735.1	d__Bacteria;p__Bacillota_A;c__Clostridia;o__Oscillospirales;f__Ruminococcaceae;g__Faecalibacterium;s__Faecalibacterium sp934525735	blast	90.9	None
contig002757	vOTU001037	GB_GCA_900772565.1	d__Bacteria;p__Bacillota_A;c__Clostridia;o__Oscillospirales;f__Ruminococcaceae;g__Faecalibacterium;s__Faecalibacterium sp900772565	blast	90.8	None
contig002757	vOTU001037	RS_GCF_023347255.1	d__Bacteria;p__Bacillota_A;c__Clostridia;o__Oscillospirales;f__Ruminococcaceae;g__Faecalibacterium;s__Faecalibacterium prausnitzii_D	blast	90.8	None
contig002757	vOTU001037	GB_GCA_014858325.1	d__Bacteria;p__Bacillota_A;c__Clostridia;o__Oscillospirales;f__Ruminococcaceae;g__Faecalibacterium;s__Faecalibacterium sp014858325	blast	90.6	None
contig002757	vOTU001037	MGYG000082153	d__Bacteria;p__Bacillota_A;c__Clostridia;o__Oscillospirales;f__Ruminococcaceae;g__Faecalibacterium;s__	blast	90.4	None
contig002761	vOTU001038	RS_GCF_002160135.1	d__Bacteria;p__Bacillota_A;c__Clostridia;o__Lachnospirales;f__Lachnospiraceae;g__Choladocola;s__Choladocola avistercoris	blast	91.1	None
contig002782	vOTU001048	RS_GCF_002160765.1	d__Bacteria;p__Bacillota_A;c__Clostridia;o__Lachnospirales;f__Lachnospiraceae;g__Merdisoma;s__Merdisoma faecalis	CRISPR	97.5	iPHoP-RF;72.60
contig002798	vOTU001055	GB_GCA_944381165.1	d__Bacteria;p__Bacillota_A;c__Clostridia;o__Lachnospirales;f__Lachnospiraceae;g__Lachnospira;s__Lachnospira sp944381165	CRISPR	97.3	None
contig002798	vOTU001055	GB_GCA_900112995.1	d__Bacteria;p__Bacillota_A;c__Clostridia;o__Lachnospirales;f__Lachnospiraceae;g__Lachnospira;s__Lachnospira rogosae	CRISPR	97.2	None
contig002798	vOTU001055	GB_GCA_000436535.1	d__Bacteria;p__Bacillota_A;c__Clostridia;o__Lachnospirales;f__Lachnospiraceae;g__Lachnospira;s__Lachnospira sp000436535	CRISPR	95.6	None
contig002798	vOTU001055	GB_GCA_000436475.1	d__Bacteria;p__Bacillota_A;c__Clostridia;o__Lachnospirales;f__Lachnospiraceae;g__Lachnospira;s__Lachnospira sp000436475	CRISPR	94.6	None
contig002798	vOTU001055	GB_GCA_003458705.1	d__Bacteria;p__Bacillota_A;c__Clostridia;o__Lachnospirales;f__Lachnospiraceae;g__Lachnospira;s__Lachnospira sp003537285	CRISPR	94.6	None
contig002798	vOTU001055	RS_GCF_014287955.1	d__Bacteria;p__Bacillota_A;c__Clostridia;o__Lachnospirales;f__Lachnospiraceae;g__Lachnospira;s__Lachnospira sp900316325	CRISPR	93.4	None
contig002798	vOTU001055	GB_GCA_904418845.1	d__Bacteria;p__Bacillota_A;c__Clostridia;o__Lachnospirales;f__Lachnospiraceae;g__Mediterraneibacter;s__Mediterraneibacter sp904418845	blast	90.5	None
contig002807	vOTU001060	GB_GCA_944384825.1	d__Bacteria;p__Bacillota_A;c__Clostridia;o__Oscillospirales;f__Acutalibacteraceae;g__UMGS1491;s__UMGS1491 sp944384825	blast	93.9	iPHoP-RF;85.70
contig002810	vOTU001062	GB_GCA_904418845.1	d__Bacteria;p__Bacillota_A;c__Clostridia;o__Lachnospirales;f__Lachnospiraceae;g__Mediterraneibacter;s__Mediterraneibacter sp904418845	blast	95.1	iPHoP-RF;78.50
contig002810	vOTU001062	GB_GCA_944381935.1	d__Bacteria;p__Bacillota_A;c__Clostridia;o__Lachnospirales;f__Lachnospiraceae;g__Mediterraneibacter;s__Mediterraneibacter sp944381935	blast	92.5	iPHoP-RF;57.10
contig002810	vOTU001062	GB_GCA_019116885.1	d__Bacteria;p__Bacillota_A;c__Clostridia;o__Lachnospirales;f__Lachnospiraceae;g__Mediterraneibacter;s__Mediterraneibacter pullistercoris	blast	91.3	iPHoP-RF;68.90
contig002810	vOTU001062	MGYG000314054	d__Bacteria;p__Bacillota_A;c__Clostridia;o__Lachnospirales;f__Lachnospiraceae;g__Mediterraneibacter;s__	blast	90.5	iPHoP-RF;84.80
contig002810	vOTU001062	GB_GCA_944375765.1	d__Bacteria;p__Bacillota_A;c__Clostridia;o__Lachnospirales;f__Lachnospiraceae;g__Mediterraneibacter;s__Mediterraneibacter sp944375765	blast	90.1	iPHoP-RF;52.20
contig002818	vOTU001065	GB_GCA_019114755.1	d__Bacteria;p__Bacillota_A;c__Clostridia;o__Christensenellales;f__Borkfalkiaceae;g__Borkfalkia;s__Borkfalkia faecavium	CRISPR	93.9	iPHoP-RF;67.50
contig002825	vOTU001068	GB_GCA_900544635.1	d__Bacteria;p__Synergistota;c__Synergistia;o__Synergistales;f__Synergistaceae;g__Caccocola;s__Caccocola faecigallinarum	blast	94.6	iPHoP-RF;75.90
contig002825	vOTU001068	GB_GCA_900545755.1	d__Bacteria;p__Synergistota;c__Synergistia;o__Synergistales;f__Synergistaceae;g__Caccocola;s__Caccocola sp900545755	blast	93.9	iPHoP-RF;86.70
contig002840	vOTU001073	GB_GCA_944366945.1	d__Bacteria;p__Bacillota_A;c__Clostridia;o__Christensenellales;f__CAG-138;g__UBA1685;s__UBA1685 sp944366945	CRISPR	96.4	blast;92.70 iPHoP-RF;70.90
contig002850	vOTU062093	MGYG000269208	d__Bacteria;p__Desulfobacterota;c__Desulfovibrionia;o__Desulfovibrionales;f__Desulfovibrionaceae;g__Desulfovibrio;s__	iPHoP-RF	97.1	None
contig002850	vOTU062093	MGYG000179013	d__Bacteria;p__Desulfobacterota;c__Desulfovibrionia;o__Desulfovibrionales;f__Desulfovibrionaceae;g__Desulfovibrio;s__	iPHoP-RF	96.7	None
contig002850	vOTU062093	RS_GCF_000156375.1	d__Bacteria;p__Desulfobacterota;c__Desulfovibrionia;o__Desulfovibrionales;f__Desulfovibrionaceae;g__Desulfovibrio;s__Desulfovibrio piger	iPHoP-RF	96.7	blast;96.40
contig002850	vOTU062093	RS_GCF_012843875.1	d__Bacteria;p__Desulfobacterota;c__Desulfovibrionia;o__Desulfovibrionales;f__Desulfovibrionaceae;g__Desulfovibrio;s__Desulfovibrio sp900556755	iPHoP-RF	96.7	blast;96.70 CRISPR;74.60
contig002850	vOTU062093	RS_GCF_900116045.1	d__Bacteria;p__Desulfobacterota;c__Desulfovibrionia;o__Desulfovibrionales;f__Desulfovibrionaceae;g__Desulfovibrio;s__Desulfovibrio piger_A	iPHoP-RF	96.7	blast;91.70
contig002850	vOTU062093	MGYG000002687	d__Bacteria;p__Desulfobacterota;c__Desulfovibrionia;o__Desulfovibrionales;f__Desulfovibrionaceae;g__Desulfovibrio;s__	blast	96.3	iPHoP-RF;94.70 CRISPR;92.60
contig002850	vOTU062093	RS_GCF_000420465.1	d__Bacteria;p__Desulfobacterota;c__Desulfovibrionia;o__Desulfovibrionales;f__Desulfovibrionaceae;g__Desulfovibrio;s__Desulfovibrio desulfuricans	iPHoP-RF	92.4	None
contig002850	vOTU062093	GB_GCA_023419375.1	d__Bacteria;p__Desulfobacterota;c__Desulfovibrionia;o__Desulfovibrionales;f__Desulfovibrionaceae;g__Desulfovibrio;s__Desulfovibrio sp023419375	iPHoP-RF	92.1	None
contig002850	vOTU062093	GB_GCA_000403945.1	d__Bacteria;p__Desulfobacterota;c__Desulfovibrionia;o__Desulfovibrionales;f__Desulfovibrionaceae;g__Desulfovibrio;s__Desulfovibrio sp000403945	blast	90.7	iPHoP-RF;86.70
contig002850	vOTU062093	GB_GCA_944327285.1	d__Bacteria;p__Desulfobacterota;c__Desulfovibrionia;o__Desulfovibrionales;f__Desulfovibrionaceae;g__Desulfovibrio;s__Desulfovibrio sp944327285	blast	90	iPHoP-RF;70.00
contig002850	vOTU062093	GB_GCA_945871415.1	d__Bacteria;p__Desulfobacterota;c__Desulfovibrionia;o__Desulfovibrionales;f__Desulfovibrionaceae;g__Desulfovibrio;s__Desulfovibrio sp945871415	blast	90	iPHoP-RF;69.50
contig002854	vOTU001078	GB_GCA_944372195.1	d__Bacteria;p__Bacillota;c__Bacilli;o__RF39;f__UBA660;g__Faecisoma;s__Faecisoma sp944372195	blast	93.8	iPHoP-RF;68.20
contig002862	vOTU109778	GB_GCA_900754495.1	d__Bacteria;p__Actinomycetota;c__Coriobacteriia;o__Coriobacteriales;f__Eggerthellaceae;g__Aphodovivens;s__Aphodovivens avicola	CRISPR	98.6	iPHoP-RF;68.60
contig002862	vOTU109778	RS_GCF_000270285.1	d__Bacteria;p__Actinomycetota;c__Coriobacteriia;o__Coriobacteriales;f__Eggerthellaceae;g__Enteroscipio;s__Enteroscipio sp000270285	CRISPR	98.6	iPHoP-RF;74.30
contig002862	vOTU109778	RS_GCF_000024265.1	d__Bacteria;p__Actinomycetota;c__Coriobacteriia;o__Coriobacteriales;f__Eggerthellaceae;g__Eggerthella;s__Eggerthella lenta	CRISPR	93.4	iPHoP-RF;75.00
contig002862	vOTU109778	RS_GCF_000311845.1	d__Bacteria;p__Actinomycetota;c__Coriobacteriia;o__Coriobacteriales;f__Coriobacteriaceae;g__Enorma;s__Enorma massiliensis	blast	91.4	None
contig002862	vOTU109778	RS_GCF_003459245.1	d__Bacteria;p__Actinomycetota;c__Coriobacteriia;o__Coriobacteriales;f__Coriobacteriaceae;g__Collinsella;s__Collinsella sp003459245	blast	90.3	iPHoP-RF;54.10
contig002863	vOTU001083	RS_GCF_002160755.1	d__Bacteria;p__Bacillota_A;c__Clostridia;o__Lachnospirales;f__Lachnospiraceae;g__Lachnoclostridium_A;s__Lachnoclostridium_A sp002160755	CRISPR	96.1	iPHoP-RF;71.70
contig002863	vOTU001083	RS_GCF_020736365.1	d__Bacteria;p__Bacillota_A;c__Clostridia;o__Lachnospirales;f__Lachnospiraceae;g__Clostridium_Q;s__Clostridium_Q saccharolyticum_A	blast	93	iPHoP-RF;86.30 CRISPR;69.00
contig002863	vOTU001083	GB_GCA_001304875.1	d__Bacteria;p__Bacillota_A;c__Clostridia;o__Lachnospirales;f__Lachnospiraceae;g__Ventrisoma;s__Ventrisoma faecale	blast	91	iPHoP-RF;74.60
contig002863	vOTU001083	GB_GCA_019114305.1	d__Bacteria;p__Bacillota_A;c__Clostridia;o__Lachnospirales;f__Lachnospiraceae;g__Hungatella_B;s__Hungatella_B pullicola	blast	90.1	iPHoP-RF;54.90
contig002870	vOTU001087	RS_GCF_002160765.1	d__Bacteria;p__Bacillota_A;c__Clostridia;o__Lachnospirales;f__Lachnospiraceae;g__Merdisoma;s__Merdisoma faecalis	blast	93.6	None
contig002870	vOTU001087	RS_GCF_020736365.1	d__Bacteria;p__Bacillota_A;c__Clostridia;o__Lachnospirales;f__Lachnospiraceae;g__Clostridium_Q;s__Clostridium_Q saccharolyticum_A	blast	91.6	iPHoP-RF;77.50
contig002879	vOTU001091	GB_GCA_022009855.1	d__Bacteria;p__Verrucomicrobiota;c__Lentisphaeria;o__Victivallales;f__Victivallaceae;g__Victivallis;s__Victivallis sp900550905	CRISPR	96.5	blast;92.50 iPHoP-RF;75.00
contig002879	vOTU001091	GB_GCA_900551245.1	d__Bacteria;p__Verrucomicrobiota;c__Lentisphaeria;o__Victivallales;f__Victivallaceae;g__Victivallis;s__Victivallis sp900551245	CRISPR	95.4	blast;90.60 iPHoP-RF;53.30
contig002879	vOTU001091	RS_GCF_009695545.1	d__Bacteria;p__Verrucomicrobiota;c__Lentisphaeria;o__Victivallales;f__Victivallaceae;g__Victivallis;s__Victivallis lenta	CRISPR	90.4	iPHoP-RF;54.40
contig002887	vOTU001092	GB_GCA_017886705.1	d__Bacteria;p__Bacillota;c__Bacilli;o__RF39;f__UBA660;g__Faecimonas;s__Faecimonas sp017886705	CRISPR	99	None
contig002887	vOTU001092	GB_GCA_944371995.1	d__Bacteria;p__Bacillota;c__Bacilli;o__RF39;f__UBA660;g__Faecimonas;s__Faecimonas sp944371995	CRISPR	99	None
contig002887	vOTU001092	GB_GCA_944358705.1	d__Bacteria;p__Bacillota;c__Bacilli;o__RF39;f__UBA660;g__Faecimonas;s__Faecimonas sp944358705	CRISPR	98.5	None
contig002887	vOTU001092	GB_GCA_900554305.1	d__Bacteria;p__Bacillota;c__Bacilli;o__RF39;f__UBA660;g__Faecimonas;s__Faecimonas intestinavium	blast	91.7	None
contig002887	vOTU001092	GB_GCA_900548695.1	d__Bacteria;p__Bacillota;c__Bacilli;o__RF39;f__UBA660;g__Faecimonas;s__Faecimonas sp900548695	blast	90.9	None
contig002889	vOTU001093	MGYG000004078	d__Bacteria;p__Bacillota_A;c__Clostridia;o__TANB77;f__CAG-508;g__CAG-273;s__	CRISPR	99.5	None
contig002889	vOTU001093	GB_GCA_017886645.1	d__Bacteria;p__Bacillota_A;c__Clostridia;o__TANB77;f__CAG-508;g__CAG-273;s__CAG-273 sp017886645	CRISPR	98.9	None
contig002889	vOTU001093	GB_GCA_000435755.1	d__Bacteria;p__Bacillota_A;c__Clostridia;o__TANB77;f__CAG-508;g__CAG-273;s__CAG-273 sp000435755	CRISPR	98.8	None
contig002889	vOTU001093	GB_GCA_000437855.1	d__Bacteria;p__Bacillota_A;c__Clostridia;o__TANB77;f__CAG-508;g__CAG-273;s__CAG-273 sp000437855	CRISPR	98.7	None
contig002889	vOTU001093	GB_GCA_000438355.1	d__Bacteria;p__Bacillota_A;c__Clostridia;o__TANB77;f__CAG-508;g__CAG-273;s__CAG-273 sp000438355	CRISPR	97	None
contig002896	vOTU001099	GB_GCA_018716805.1	d__Bacteria;p__Bacillota_A;c__Clostridia;o__Christensenellales;f__CAG-74;g__Faecivicinus;s__Faecivicinus avistercoris	blast	91.1	iPHoP-RF;50.90
contig002897	vOTU001100	GB_GCA_944350015.1	d__Bacteria;p__Bacillota_A;c__Clostridia;o__Christensenellales;f__UBA1242;g__Caccovivens;s__Caccovivens sp944350015	CRISPR	98.9	None
contig002897	vOTU001100	MGYG000308849	d__Bacteria;p__Bacillota_A;c__Clostridia;o__Christensenellales;f__UBA1242;g__Caccovivens;s__	CRISPR	98.8	None
contig002897	vOTU001100	MGYG000319660	d__Bacteria;p__Bacillota_A;c__Clostridia;o__Christensenellales;f__UBA1242;g__Caccovivens;s__	CRISPR	98.8	None
contig002897	vOTU001100	GB_GCA_944380695.1	d__Bacteria;p__Bacillota_A;c__Clostridia;o__Christensenellales;f__UBA1242;g__Caccovivens;s__Caccovivens sp944380695	blast	91.6	iPHoP-RF;61.10
contig002902	vOTU001105	RS_GCF_000949455.1	d__Bacteria;p__Bacillota_A;c__Clostridia;o__Oscillospirales;f__Ruminococcaceae;g__Ruthenibacterium;s__Ruthenibacterium lactatiformans	blast	91.8	iPHoP-RF;71.90
contig002905	vOTU001107	GB_GCA_910589315.1	d__Bacteria;p__Bacillota_A;c__Clostridia;o__Oscillospirales;f__Oscillospiraceae;g__Dysosmobacter;s__Dysosmobacter sp910589315	blast	92.8	iPHoP-RF;67.30
contig002912	vOTU001110	RS_GCF_900116045.1	d__Bacteria;p__Desulfobacterota;c__Desulfovibrionia;o__Desulfovibrionales;f__Desulfovibrionaceae;g__Desulfovibrio;s__Desulfovibrio piger_A	CRISPR	97.7	blast;92.90 iPHoP-RF;85.70
contig002912	vOTU001110	RS_GCF_012843875.1	d__Bacteria;p__Desulfobacterota;c__Desulfovibrionia;o__Desulfovibrionales;f__Desulfovibrionaceae;g__Desulfovibrio;s__Desulfovibrio sp900556755	CRISPR	97.6	blast;95.80 iPHoP-RF;89.50
contig002912	vOTU001110	RS_GCF_000156375.1	d__Bacteria;p__Desulfobacterota;c__Desulfovibrionia;o__Desulfovibrionales;f__Desulfovibrionaceae;g__Desulfovibrio;s__Desulfovibrio piger	blast	94.3	CRISPR;94.20 iPHoP-RF;87.90
contig002912	vOTU001110	MGYG000002687	d__Bacteria;p__Desulfobacterota;c__Desulfovibrionia;o__Desulfovibrionales;f__Desulfovibrionaceae;g__Desulfovibrio;s__	blast	93.9	iPHoP-RF;90.10
contig002912	vOTU001110	GB_GCA_944324505.1	d__Bacteria;p__Desulfobacterota;c__Desulfovibrionia;o__Desulfovibrionales;f__Desulfovibrionaceae;g__Desulfovibrio;s__Desulfovibrio sp944324505	blast	90.9	iPHoP-RF;70.90
contig002913	vOTU001111	GB_GCA_000436375.1	d__Bacteria;p__Pseudomonadota;c__Alphaproteobacteria;o__RF32;f__CAG-239;g__Scatacola_A;s__Scatacola_A faecigallinarum	CRISPR	98.8	iPHoP-RF;73.70
contig002913	vOTU001111	GB_GCA_001917125.1	d__Bacteria;p__Pseudomonadota;c__Alphaproteobacteria;o__RF32;f__CAG-239;g__Scatocola;s__Scatocola faecipullorum	CRISPR	98.8	iPHoP-RF;64.30
contig002913	vOTU001111	GB_GCA_944391365.1	d__Bacteria;p__Pseudomonadota;c__Alphaproteobacteria;o__RF32;f__CAG-239;g__HGM16780;s__HGM16780 sp944391365	CRISPR	98.8	None
contig002913	vOTU001111	GB_GCA_934254925.1	d__Bacteria;p__Pseudomonadota;c__Alphaproteobacteria;o__RF32;f__CAG-239;g__CAKQMD01;s__CAKQMD01 sp934254925	CRISPR	98.5	iPHoP-RF;64.50
contig002913	vOTU001111	GB_GCA_944392155.1	d__Bacteria;p__Pseudomonadota;c__Alphaproteobacteria;o__RF32;f__CAG-239;g__Scatacola_A;s__Scatacola_A sp944392155	CRISPR	98.5	iPHoP-RF;72.80
contig002913	vOTU001111	GB_GCA_000432275.1	d__Bacteria;p__Pseudomonadota;c__Alphaproteobacteria;o__RF32;f__CAG-239;g__CAZU01;s__CAZU01 sp000432275	CRISPR	97.9	None
contig002913	vOTU001111	GB_GCA_900540425.1	d__Bacteria;p__Pseudomonadota;c__Alphaproteobacteria;o__RF32;f__CAG-239;g__MGBC133411;s__MGBC133411 sp900540425	CRISPR	96.1	None
contig002913	vOTU001111	GB_GCA_001917175.1	d__Bacteria;p__Pseudomonadota;c__Alphaproteobacteria;o__RF32;f__CAG-239;g__51-20;s__51-20 sp001917175	CRISPR	90.6	None
contig002932	vOTU001120	RS_GCF_014337155.1	d__Bacteria;p__Bacillota_A;c__Clostridia;o__Lachnospirales;f__Lachnospiraceae;g__Wujia;s__Wujia chipingensis	blast	92	iPHoP-RF;64.00
contig002946	vOTU001127	GB_GCA_944324055.1	d__Bacteria;p__Cyanobacteriota;c__Vampirovibrionia;o__Gastranaerophilales;f__Gastranaerophilaceae;g__UMGS1585;s__UMGS1585 sp944324055	blast	90.1	None
contig002947	vOTU001128	GB_GCA_905207245.1	d__Bacteria;p__Bacteroidota;c__Bacteroidia;o__Bacteroidales;f__Bacteroidaceae;g__Bacteroides;s__Bacteroides sp905207245	iPHoP-RF	97.1	None
contig002947	vOTU001128	MGYG000004003	d__Bacteria;p__Bacteroidota;c__Bacteroidia;o__Bacteroidales;f__Bacteroidaceae;g__Bacteroides;s__	iPHoP-RF	97.1	None
contig002947	vOTU001128	RS_GCF_000172175.1	d__Bacteria;p__Bacteroidota;c__Bacteroidia;o__Bacteroidales;f__Bacteroidaceae;g__Bacteroides;s__Bacteroides intestinalis	iPHoP-RF	97.1	None
contig002947	vOTU001128	RS_GCF_000315485.1	d__Bacteria;p__Bacteroidota;c__Bacteroidia;o__Bacteroidales;f__Bacteroidaceae;g__Bacteroides;s__Bacteroides oleiciplenus	iPHoP-RF	97.1	None
contig002947	vOTU001128	RS_GCF_001688725.2	d__Bacteria;p__Bacteroidota;c__Bacteroidia;o__Bacteroidales;f__Bacteroidaceae;g__Bacteroides;s__Bacteroides caecimuris	iPHoP-RF	97.1	None
contig002947	vOTU001128	RS_GCF_003464595.1	d__Bacteria;p__Bacteroidota;c__Bacteroidia;o__Bacteroidales;f__Bacteroidaceae;g__Bacteroides;s__Bacteroides intestinalis_A	iPHoP-RF	97.1	None
contig002947	vOTU001128	RS_GCF_903181435.1	d__Bacteria;p__Bacteroidota;c__Bacteroidia;o__Bacteroidales;f__Bacteroidaceae;g__Bacteroides;s__Bacteroides sp900765785	iPHoP-RF	97.1	None
contig002947	vOTU001128	GB_GCA_905215555.1	d__Bacteria;p__Bacteroidota;c__Bacteroidia;o__Bacteroidales;f__Bacteroidaceae;g__Bacteroides;s__Bacteroides sp905215555	iPHoP-RF	96.7	None
contig002947	vOTU001128	RS_GCF_003865075.1	d__Bacteria;p__Bacteroidota;c__Bacteroidia;o__Bacteroidales;f__Bacteroidaceae;g__Bacteroides;s__Bacteroides faecalis	iPHoP-RF	96.7	None
contig002947	vOTU001128	RS_GCF_024623065.1	d__Bacteria;p__Bacteroidota;c__Bacteroidia;o__Bacteroidales;f__Bacteroidaceae;g__Bacteroides;s__Bacteroides acidifaciens	iPHoP-RF	96.7	None
contig002947	vOTU001128	RS_GCF_900142015.1	d__Bacteria;p__Bacteroidota;c__Bacteroidia;o__Bacteroidales;f__Bacteroidaceae;g__Bacteroides;s__Bacteroides stercorirosoris	iPHoP-RF	96.7	None
contig002947	vOTU001128	RS_GCF_902364365.1	d__Bacteria;p__Bacteroidota;c__Bacteroidia;o__Bacteroidales;f__Bacteroidaceae;g__Bacteroides;s__Bacteroides sp900556215	iPHoP-RF	96.7	None
contig002947	vOTU001128	MGYG000282907	d__Bacteria;p__Bacteroidota;c__Bacteroidia;o__Bacteroidales;f__Bacteroidaceae;g__Bacteroides;s__	iPHoP-RF	96.4	None
contig002947	vOTU001128	RS_GCF_000158035.1	d__Bacteria;p__Bacteroidota;c__Bacteroidia;o__Bacteroidales;f__Bacteroidaceae;g__Bacteroides;s__Bacteroides cellulosilyticus	iPHoP-RF	96.4	None
contig002947	vOTU001128	RS_GCF_009193325.2	d__Bacteria;p__Bacteroidota;c__Bacteroidia;o__Bacteroidales;f__Bacteroidaceae;g__Bacteroides;s__Bacteroides zhangwenhongii	iPHoP-RF	96.4	None
contig002947	vOTU001128	GB_GCA_900557355.1	d__Bacteria;p__Bacteroidota;c__Bacteroidia;o__Bacteroidales;f__Bacteroidaceae;g__Bacteroides;s__Bacteroides sp900557355	iPHoP-RF	96.1	None
contig002947	vOTU001128	GB_GCA_902362375.1	d__Bacteria;p__Bacteroidota;c__Bacteroidia;o__Bacteroidales;f__Bacteroidaceae;g__Bacteroides;s__Bacteroides sp902362375	iPHoP-RF	96.1	None
contig002947	vOTU001128	MGYG000128284	d__Bacteria;p__Bacteroidota;c__Bacteroidia;o__Bacteroidales;f__Bacteroidaceae;g__Phocaeicola;s__	iPHoP-RF	96.1	None
contig002947	vOTU001128	RS_GCF_014334015.1	d__Bacteria;p__Bacteroidota;c__Bacteroidia;o__Bacteroidales;f__Bacteroidaceae;g__Bacteroides;s__Bacteroides intestinigallinarum	iPHoP-RF	96.1	None
contig002947	vOTU001128	RS_GCF_000156195.1	d__Bacteria;p__Bacteroidota;c__Bacteroidia;o__Bacteroidales;f__Bacteroidaceae;g__Bacteroides;s__Bacteroides finegoldii	iPHoP-RF	95.7	None
contig002947	vOTU001128	RS_GCF_000513195.1	d__Bacteria;p__Bacteroidota;c__Bacteroidia;o__Bacteroidales;f__Bacteroidaceae;g__Bacteroides;s__Bacteroides timonensis	iPHoP-RF	95.7	None
contig002947	vOTU001128	RS_GCF_012113595.1	d__Bacteria;p__Bacteroidota;c__Bacteroidia;o__Bacteroidales;f__Bacteroidaceae;g__Bacteroides;s__Bacteroides sp012113595	iPHoP-RF	95.7	None
contig002947	vOTU001128	RS_GCF_014750685.1	d__Bacteria;p__Bacteroidota;c__Bacteroidia;o__Bacteroidales;f__Bacteroidaceae;g__Bacteroides;s__Bacteroides sp014750685	iPHoP-RF	95.7	None
contig002947	vOTU001128	RS_GCF_900130125.1	d__Bacteria;p__Bacteroidota;c__Bacteroidia;o__Bacteroidales;f__Bacteroidaceae;g__Bacteroides;s__Bacteroides congonensis	iPHoP-RF	95.7	None
contig002947	vOTU001128	GB_GCA_025147485.1	d__Bacteria;p__Bacteroidota;c__Bacteroidia;o__Bacteroidales;f__Bacteroidaceae;g__Bacteroides;s__Bacteroides uniformis	iPHoP-RF	95.4	None
contig002947	vOTU001128	RS_GCF_000614125.1	d__Bacteria;p__Bacteroidota;c__Bacteroidia;o__Bacteroidales;f__Bacteroidaceae;g__Bacteroides;s__Bacteroides rodentium	iPHoP-RF	95.4	None
contig002947	vOTU001128	MGYG000165276	d__Bacteria;p__Bacteroidota;c__Bacteroidia;o__Bacteroidales;f__Bacteroidaceae;g__Bacteroides;s__	iPHoP-RF	95.1	None
contig002947	vOTU001128	MGYG000250372	d__Bacteria;p__Bacteroidota;c__Bacteroidia;o__Bacteroidales;f__Bacteroidaceae;g__Phocaeicola;s__	iPHoP-RF	95.1	None
contig002947	vOTU001128	RS_GCF_000614185.1	d__Bacteria;p__Bacteroidota;c__Bacteroidia;o__Bacteroidales;f__Bacteroidaceae;g__Phocaeicola;s__Phocaeicola sartorii	iPHoP-RF	95.1	None
contig002947	vOTU001128	RS_GCF_900106755.1	d__Bacteria;p__Bacteroidota;c__Bacteroidia;o__Bacteroidales;f__Bacteroidaceae;g__Bacteroides;s__Bacteroides faecis	iPHoP-RF	95.1	None
contig002947	vOTU001128	MGYG000065103	d__Bacteria;p__Bacteroidota;c__Bacteroidia;o__Bacteroidales;f__Bacteroidaceae;g__Bacteroides;s__	iPHoP-RF	94.7	None
contig002947	vOTU001128	RS_GCF_000195635.1	d__Bacteria;p__Bacteroidota;c__Bacteroidia;o__Bacteroidales;f__Bacteroidaceae;g__Bacteroides;s__Bacteroides fluxus	iPHoP-RF	94.7	None
contig002947	vOTU001128	RS_GCF_020091405.1	d__Bacteria;p__Bacteroidota;c__Bacteroidia;o__Bacteroidales;f__Bacteroidaceae;g__Bacteroides;s__Bacteroides sp900552405	iPHoP-RF	94.7	None
contig002947	vOTU001128	GB_GCA_902388365.1	d__Bacteria;p__Bacteroidota;c__Bacteroidia;o__Bacteroidales;f__Bacteroidaceae;g__Phocaeicola;s__Phocaeicola sp902388365	iPHoP-RF	94.4	None
contig002947	vOTU001128	RS_GCF_018390535.1	d__Bacteria;p__Bacteroidota;c__Bacteroidia;o__Bacteroidales;f__Bacteroidaceae;g__Bacteroides;s__Bacteroides propionicigenes	iPHoP-RF	94.4	None
contig002947	vOTU001128	GB_GCA_900761785.1	d__Bacteria;p__Bacteroidota;c__Bacteroidia;o__Bacteroidales;f__Bacteroidaceae;g__Bacteroides;s__Bacteroides sp900761785	iPHoP-RF	94.1	None
contig002947	vOTU001128	GB_GCA_905197435.1	d__Bacteria;p__Bacteroidota;c__Bacteroidia;o__Bacteroidales;f__Bacteroidaceae;g__Bacteroides;s__Bacteroides sp905197435	iPHoP-RF	94.1	None
contig002947	vOTU001128	RS_GCF_900128475.1	d__Bacteria;p__Bacteroidota;c__Bacteroidia;o__Bacteroidales;f__Bacteroidaceae;g__Mediterranea;s__Mediterranea massiliensis	iPHoP-RF	94.1	blast;93.60
contig002947	vOTU001128	RS_GCF_900129655.1	d__Bacteria;p__Bacteroidota;c__Bacteroidia;o__Bacteroidales;f__Bacteroidaceae;g__Bacteroides;s__Bacteroides clarus	iPHoP-RF	94.1	None
contig002947	vOTU001128	RS_GCF_900241005.1	d__Bacteria;p__Bacteroidota;c__Bacteroidia;o__Bacteroidales;f__Bacteroidaceae;g__Bacteroides;s__Bacteroides cutis	iPHoP-RF	93.7	None
contig002947	vOTU001128	GB_GCA_011959205.1	d__Bacteria;p__Bacteroidota;c__Bacteroidia;o__Bacteroidales;f__Bacteroidaceae;g__Phocaeicola;s__Phocaeicola sp011959205	iPHoP-RF	93.4	None
contig002947	vOTU001128	RS_GCF_000186225.1	d__Bacteria;p__Bacteroidota;c__Bacteroidia;o__Bacteroidales;f__Bacteroidaceae;g__Bacteroides;s__Bacteroides helcogenes	iPHoP-RF	93.4	None
contig002947	vOTU001128	RS_GCF_004793475.1	d__Bacteria;p__Bacteroidota;c__Bacteroidia;o__Bacteroidales;f__Bacteroidaceae;g__Bacteroides;s__Bacteroides sp002491635	iPHoP-RF	93.4	None
contig002947	vOTU001128	GB_GCA_022648295.1	d__Bacteria;p__Bacteroidota;c__Bacteroidia;o__Bacteroidales;f__Bacteroidaceae;g__Bacteroides;s__Bacteroides sp022648295	iPHoP-RF	93.1	None
contig002947	vOTU001128	GB_GCA_905215345.1	d__Bacteria;p__Bacteroidota;c__Bacteroidia;o__Bacteroidales;f__Bacteroidaceae;g__Bacteroides;s__Bacteroides sp905215345	iPHoP-RF	93.1	None
contig002947	vOTU001128	GB_GCA_025147325.1	d__Bacteria;p__Bacteroidota;c__Bacteroidia;o__Bacteroidales;f__Bacteroidaceae;g__Bacteroides;s__Bacteroides stercoris	iPHoP-RF	92.8	None
contig002947	vOTU001128	RS_GCF_000157915.1	d__Bacteria;p__Bacteroidota;c__Bacteroidia;o__Bacteroidales;f__Bacteroidaceae;g__Phocaeicola;s__Phocaeicola coprophilus	blast	92.8	iPHoP-RF;82.80
contig002947	vOTU001128	RS_GCF_013009555.1	d__Bacteria;p__Bacteroidota;c__Bacteroidia;o__Bacteroidales;f__Bacteroidaceae;g__Phocaeicola;s__Phocaeicola dorei	iPHoP-RF	92.8	None
contig002947	vOTU001128	RS_GCF_021730445.1	d__Bacteria;p__Bacteroidota;c__Bacteroidia;o__Bacteroidales;f__Bacteroidaceae;g__Phocaeicola;s__Phocaeicola faecalis	iPHoP-RF	92.8	None
contig002947	vOTU001128	GB_GCA_025146565.1	d__Bacteria;p__Bacteroidota;c__Bacteroidia;o__Bacteroidales;f__Bacteroidaceae;g__Bacteroides;s__Bacteroides eggerthii	iPHoP-RF	92.4	None
contig002947	vOTU001128	RS_GCF_000012825.1	d__Bacteria;p__Bacteroidota;c__Bacteroidia;o__Bacteroidales;f__Bacteroidaceae;g__Phocaeicola;s__Phocaeicola vulgatus	iPHoP-RF	92.4	None
contig002947	vOTU001128	RS_GCF_000382445.1	d__Bacteria;p__Bacteroidota;c__Bacteroidia;o__Bacteroidales;f__Bacteroidaceae;g__Phocaeicola;s__Phocaeicola massiliensis	iPHoP-RF	92.4	None
contig002947	vOTU001128	RS_GCF_000374585.1	d__Bacteria;p__Bacteroidota;c__Bacteroidia;o__Bacteroidales;f__Bacteroidaceae;g__Phocaeicola;s__Phocaeicola barnesiae	blast	91.8	iPHoP-RF;87.60
contig002947	vOTU001128	RS_GCF_000187895.1	d__Bacteria;p__Bacteroidota;c__Bacteroidia;o__Bacteroidales;f__Bacteroidaceae;g__Phocaeicola;s__Phocaeicola plebeius	blast	91.7	iPHoP-RF;82.20
contig002947	vOTU001128	RS_GCF_003437535.1	d__Bacteria;p__Bacteroidota;c__Bacteroidia;o__Bacteroidales;f__Bacteroidaceae;g__Phocaeicola;s__Phocaeicola plebeius_A	blast	91.7	iPHoP-RF;82.50
contig002947	vOTU001128	GB_GCA_902362595.1	d__Bacteria;p__Bacteroidota;c__Bacteroidia;o__Bacteroidales;f__Bacteroidaceae;g__Phocaeicola;s__Phocaeicola merdigallinarum	iPHoP-RF	91.1	None
contig002947	vOTU001128	GB_GCA_945607605.1	d__Bacteria;p__Bacteroidota;c__Bacteroidia;o__Bacteroidales;f__Bacteroidaceae;g__Bacteroides;s__Bacteroides sp945607605	iPHoP-RF	90.8	None
contig002947	vOTU001128	RS_GCF_900128455.1	d__Bacteria;p__Bacteroidota;c__Bacteroidia;o__Bacteroidales;f__Bacteroidaceae;g__Phocaeicola;s__Phocaeicola mediterraneensis	iPHoP-RF	90.8	None
contig002948	vOTU001129	GB_GCA_019114545.1	d__Bacteria;p__Bacillota_A;c__Clostridia;o__Lachnospirales;f__Lachnospiraceae;g__Blautia;s__Blautia pullistercoris	blast	93.3	None
contig002951	vOTU001130	GB_GCA_003480425.1	d__Bacteria;p__Bacillota_A;c__Clostridia;o__Lachnospirales;f__Lachnospiraceae;g__Schaedlerella;s__Schaedlerella sp900066545	iPHoP-RF	91.1	None
contig002951	vOTU001130	RS_GCF_013009555.1	d__Bacteria;p__Bacteroidota;c__Bacteroidia;o__Bacteroidales;f__Bacteroidaceae;g__Phocaeicola;s__Phocaeicola dorei	blast	90.8	None
contig002954	vOTU001131	RS_GCF_020687245.1	d__Bacteria;p__Bacillota_A;c__Clostridia;o__Oscillospirales;f__Ruminococcaceae;g__Faecalibacterium;s__Faecalibacterium longum	blast	91.8	CRISPR;55.90
contig002954	vOTU001131	GB_GCA_000435975.1	d__Bacteria;p__Bacillota_A;c__Clostridia;o__Oscillospirales;f__Oscillospiraceae;g__Vescimonas;s__Vescimonas sp000435975	blast	90.9	None
contig002954	vOTU001131	GB_GCA_000435555.1	d__Bacteria;p__Bacillota_A;c__Clostridia;o__Oscillospirales;f__Oscillospiraceae;g__Vescimonas;s__Vescimonas sp000435555	blast	90.3	None
contig002958	vOTU001132	GB_GCA_000437915.1	d__Bacteria;p__Bacillota_A;c__Clostridia;o__Christensenellales;f__CAG-314;g__CAG-314;s__CAG-314 sp000437915	blast	92.7	iPHoP-RF;64.30
contig002962	vOTU001134	GB_GCA_905200545.1	d__Bacteria;p__Bacillota_A;c__Clostridia;o__Oscillospirales;f__Oscillospiraceae;g__Dysosmobacter;s__Dysosmobacter sp905200545	blast	92.2	iPHoP-RF;71.10
contig002962	vOTU001134	GB_GCA_900551885.1	d__Bacteria;p__Bacillota_A;c__Clostridia;o__Oscillospirales;f__Oscillospiraceae;g__Dysosmobacter;s__Dysosmobacter sp900551885	blast	91.9	iPHoP-RF;80.60
contig002962	vOTU001134	RS_GCF_018228705.1	d__Bacteria;p__Bacillota_A;c__Clostridia;o__Oscillospirales;f__Oscillospiraceae;g__Dysosmobacter;s__Dysosmobacter sp018228705	blast	91.4	iPHoP-RF;75.40
contig002962	vOTU001134	GB_GCA_944387035.1	d__Bacteria;p__Bacillota_A;c__Clostridia;o__Oscillospirales;f__Oscillospiraceae;g__Dysosmobacter;s__Dysosmobacter sp944387035	blast	90.8	iPHoP-RF;70.00
contig002980	vOTU001144	RS_GCF_003437535.1	d__Bacteria;p__Bacteroidota;c__Bacteroidia;o__Bacteroidales;f__Bacteroidaceae;g__Phocaeicola;s__Phocaeicola plebeius_A	blast	96.9	iPHoP-RF;92.10 CRISPR;89.80
contig002980	vOTU001144	GB_GCA_900755095.1	d__Bacteria;p__Bacteroidota;c__Bacteroidia;o__Bacteroidales;f__Bacteroidaceae;g__Bacteroides;s__Bacteroides sp900755095	iPHoP-RF	95.1	None
contig002980	vOTU001144	RS_GCF_009193295.2	d__Bacteria;p__Bacteroidota;c__Bacteroidia;o__Bacteroidales;f__Bacteroidaceae;g__Bacteroides;s__Bacteroides luhongzhouii	iPHoP-RF	95.1	None
contig002980	vOTU001144	GB_GCA_014385165.1	d__Bacteria;p__Bacteroidota;c__Bacteroidia;o__Bacteroidales;f__Bacteroidaceae;g__Bacteroides;s__Bacteroides sp014385165	iPHoP-RF	94.4	None
contig002980	vOTU001144	GB_GCA_019416685.1	d__Bacteria;p__Bacteroidota;c__Bacteroidia;o__Bacteroidales;f__Bacteroidaceae;g__Bacteroides;s__Bacteroides sp900762525	iPHoP-RF	94.4	None
contig002980	vOTU001144	RS_GCF_000210075.1	d__Bacteria;p__Bacteroidota;c__Bacteroidia;o__Bacteroidales;f__Bacteroidaceae;g__Bacteroides;s__Bacteroides xylanisolvens	iPHoP-RF	94.4	None
contig002980	vOTU001144	RS_GCF_000614145.1	d__Bacteria;p__Bacteroidota;c__Bacteroidia;o__Bacteroidales;f__Bacteroidaceae;g__Bacteroides;s__Bacteroides faecichinchillae	iPHoP-RF	94.1	None
contig002980	vOTU001144	RS_GCF_003865075.1	d__Bacteria;p__Bacteroidota;c__Bacteroidia;o__Bacteroidales;f__Bacteroidaceae;g__Bacteroides;s__Bacteroides faecalis	iPHoP-RF	94.1	None
contig002980	vOTU001144	RS_GCF_900106755.1	d__Bacteria;p__Bacteroidota;c__Bacteroidia;o__Bacteroidales;f__Bacteroidaceae;g__Bacteroides;s__Bacteroides faecis	iPHoP-RF	94.1	None
contig002980	vOTU001144	RS_GCF_903181435.1	d__Bacteria;p__Bacteroidota;c__Bacteroidia;o__Bacteroidales;f__Bacteroidaceae;g__Bacteroides;s__Bacteroides sp900765785	iPHoP-RF	94.1	None
contig002980	vOTU001144	RS_GCF_001314995.1	d__Bacteria;p__Bacteroidota;c__Bacteroidia;o__Bacteroidales;f__Bacteroidaceae;g__Bacteroides;s__Bacteroides ovatus	iPHoP-RF	92.4	None
contig002980	vOTU001144	RS_GCF_016900355.1	d__Bacteria;p__Bacteroidota;c__Bacteroidia;o__Bacteroidales;f__Bacteroidaceae;g__Phocaeicola;s__Phocaeicola sp900551065	blast	92.2	iPHoP-RF;76.80
contig002980	vOTU001144	RS_GCF_900128495.1	d__Bacteria;p__Bacteroidota;c__Bacteroidia;o__Bacteroidales;f__Bacteroidaceae;g__Phocaeicola;s__Phocaeicola ilei	CRISPR	92.1	blast;87.10 iPHoP-RF;59.50
contig002980	vOTU001144	RS_GCF_000187895.1	d__Bacteria;p__Bacteroidota;c__Bacteroidia;o__Bacteroidales;f__Bacteroidaceae;g__Phocaeicola;s__Phocaeicola plebeius	blast	91.9	iPHoP-RF;89.20
contig002980	vOTU001144	GB_GCA_905207245.1	d__Bacteria;p__Bacteroidota;c__Bacteroidia;o__Bacteroidales;f__Bacteroidaceae;g__Bacteroides;s__Bacteroides sp905207245	iPHoP-RF	91.8	None
contig002980	vOTU001144	RS_GCF_000315485.1	d__Bacteria;p__Bacteroidota;c__Bacteroidia;o__Bacteroidales;f__Bacteroidaceae;g__Bacteroides;s__Bacteroides oleiciplenus	iPHoP-RF	91.8	None
contig002980	vOTU001144	RS_GCF_000154845.1	d__Bacteria;p__Bacteroidota;c__Bacteroidia;o__Bacteroidales;f__Bacteroidaceae;g__Phocaeicola;s__Phocaeicola coprocola	CRISPR	91.5	iPHoP-RF;75.20 blast;71.50
contig002980	vOTU001144	RS_GCF_000011065.1	d__Bacteria;p__Bacteroidota;c__Bacteroidia;o__Bacteroidales;f__Bacteroidaceae;g__Bacteroides;s__Bacteroides thetaiotaomicron	iPHoP-RF	90.8	None
contig002980	vOTU001144	RS_GCF_024623065.1	d__Bacteria;p__Bacteroidota;c__Bacteroidia;o__Bacteroidales;f__Bacteroidaceae;g__Bacteroides;s__Bacteroides acidifaciens	iPHoP-RF	90.8	None
contig002980	vOTU001144	RS_GCF_000381365.1	d__Bacteria;p__Bacteroidota;c__Bacteroidia;o__Bacteroidales;f__Bacteroidaceae;g__Bacteroides;s__Bacteroides salyersiae	iPHoP-RF	90.5	CRISPR;67.70
contig002980	vOTU001144	GB_GCA_000613465.1	d__Bacteria;p__Bacteroidota;c__Bacteroidia;o__Bacteroidales;f__Bacteroidaceae;g__Bacteroides;s__Bacteroides nordii	iPHoP-RF	90.1	None
contig002980	vOTU001144	GB_GCA_902362375.1	d__Bacteria;p__Bacteroidota;c__Bacteroidia;o__Bacteroidales;f__Bacteroidaceae;g__Bacteroides;s__Bacteroides sp902362375	iPHoP-RF	90.1	None
contig002980	vOTU001144	RS_GCF_000382445.1	d__Bacteria;p__Bacteroidota;c__Bacteroidia;o__Bacteroidales;f__Bacteroidaceae;g__Phocaeicola;s__Phocaeicola massiliensis	iPHoP-RF	90.1	None
contig002980	vOTU001144	RS_GCF_014334015.1	d__Bacteria;p__Bacteroidota;c__Bacteroidia;o__Bacteroidales;f__Bacteroidaceae;g__Bacteroides;s__Bacteroides intestinigallinarum	iPHoP-RF	90.1	None
contig002980	vOTU001144	RS_GCF_900155865.1	d__Bacteria;p__Bacteroidota;c__Bacteroidia;o__Bacteroidales;f__Bacteroidaceae;g__Bacteroides;s__Bacteroides bouchesdurhonensis	iPHoP-RF	90.1	None
contig002983	vOTU001146	GB_GCA_944368775.1	d__Bacteria;p__Bacillota_A;c__Clostridia;o__Christensenellales;f__Borkfalkiaceae;g__Borkfalkia;s__Borkfalkia sp944368775	CRISPR	97.6	None
contig002983	vOTU001146	GB_GCA_019114755.1	d__Bacteria;p__Bacillota_A;c__Clostridia;o__Christensenellales;f__Borkfalkiaceae;g__Borkfalkia;s__Borkfalkia faecavium	CRISPR	96	None
contig002983	vOTU001146	GB_GCA_944407095.1	d__Bacteria;p__Pseudomonadota;c__Alphaproteobacteria;o__Rs-D84;f__Rs-D84;g__Enterousia;s__Enterousia intestinigallinarum	blast	91.2	None
contig002995	vOTU001151	GB_GCA_000283635.1	d__Bacteria;p__Bacillota;c__Bacilli;o__Lactobacillales;f__Streptococcaceae;g__Streptococcus;s__Streptococcus macedonicus	CRISPR	99.6	iPHoP-RF;97.10 blast;92.30
contig002995	vOTU001151	GB_GCA_003521145.1	d__Bacteria;p__Bacillota;c__Bacilli;o__Lactobacillales;f__Streptococcaceae;g__Streptococcus;s__Streptococcus sp003521145	CRISPR	99.6	iPHoP-RF;94.40
contig002995	vOTU001151	RS_GCF_000154985.1	d__Bacteria;p__Bacillota;c__Bacilli;o__Lactobacillales;f__Streptococcaceae;g__Streptococcus;s__Streptococcus infantarius	CRISPR	99.6	iPHoP-RF;97.10 blast;96.50
contig002995	vOTU001151	RS_GCF_000187265.1	d__Bacteria;p__Bacillota;c__Bacilli;o__Lactobacillales;f__Streptococcaceae;g__Streptococcus;s__Streptococcus equinus	CRISPR	99.6	iPHoP-RF;97.10
contig002995	vOTU001151	RS_GCF_000785515.1	d__Bacteria;p__Bacillota;c__Bacilli;o__Lactobacillales;f__Streptococcaceae;g__Streptococcus;s__Streptococcus salivarius	CRISPR	99.6	iPHoP-RF;94.70
contig002995	vOTU001151	RS_GCF_000960035.1	d__Bacteria;p__Bacillota;c__Bacilli;o__Lactobacillales;f__Streptococcaceae;g__Streptococcus;s__Streptococcus oralis_G	CRISPR	99.6	iPHoP-RF;91.80
contig002995	vOTU001151	RS_GCF_001642085.1	d__Bacteria;p__Bacillota;c__Bacilli;o__Lactobacillales;f__Streptococcaceae;g__Streptococcus;s__Streptococcus pantholopis	CRISPR	99.6	iPHoP-RF;93.10
contig002995	vOTU001151	RS_GCF_001697145.1	d__Bacteria;p__Bacillota;c__Bacilli;o__Lactobacillales;f__Streptococcaceae;g__Streptococcus;s__Streptococcus anginosus_C	CRISPR	99.6	iPHoP-RF;93.10
contig002995	vOTU001151	RS_GCF_002000985.1	d__Bacteria;p__Bacillota;c__Bacilli;o__Lactobacillales;f__Streptococcaceae;g__Streptococcus;s__Streptococcus gallolyticus	CRISPR	99.6	iPHoP-RF;94.10
contig002995	vOTU001151	RS_GCF_004843545.1	d__Bacteria;p__Bacillota;c__Bacilli;o__Lactobacillales;f__Streptococcaceae;g__Streptococcus;s__Streptococcus pasteurianus	CRISPR	99.6	blast;96.60 iPHoP-RF;94.40
contig002995	vOTU001151	RS_GCF_010120595.1	d__Bacteria;p__Bacillota;c__Bacilli;o__Lactobacillales;f__Streptococcaceae;g__Streptococcus;s__Streptococcus thermophilus	CRISPR	99.6	iPHoP-RF;95.10
contig002995	vOTU001151	RS_GCF_016461705.1	d__Bacteria;p__Bacillota;c__Bacilli;o__Lactobacillales;f__Streptococcaceae;g__Streptococcus;s__Streptococcus vicugnae	CRISPR	99.6	iPHoP-RF;93.70
contig002995	vOTU001151	RS_GCF_019929345.1	d__Bacteria;p__Bacillota;c__Bacilli;o__Lactobacillales;f__Streptococcaceae;g__Streptococcus;s__Streptococcus sp015256435	CRISPR	99.6	iPHoP-RF;93.70
contig002995	vOTU001151	RS_GCF_900475675.1	d__Bacteria;p__Bacillota;c__Bacilli;o__Lactobacillales;f__Streptococcaceae;g__Streptococcus;s__Streptococcus lutetiensis	CRISPR	99.6	iPHoP-RF;97.10 blast;91.60
contig002995	vOTU001151	RS_GCF_012277075.1	d__Bacteria;p__Bacillota;c__Bacilli;o__Lactobacillales;f__Streptococcaceae;g__Streptococcus;s__Streptococcus alactolyticus	CRISPR	99.5	iPHoP-RF;96.70 blast;96.20
contig002995	vOTU001151	GB_GCA_934196125.1	d__Bacteria;p__Bacillota;c__Bacilli;o__Lactobacillales;f__Streptococcaceae;g__Streptococcus;s__Streptococcus sp934196125	iPHoP-RF	97.1	None
contig002995	vOTU001151	RS_GCF_000186445.1	d__Bacteria;p__Bacillota;c__Bacilli;o__Lactobacillales;f__Streptococcaceae;g__Streptococcus;s__Streptococcus agalactiae	iPHoP-RF	97.1	None
contig002995	vOTU001151	RS_GCF_003337175.1	d__Bacteria;p__Bacillota;c__Bacilli;o__Lactobacillales;f__Streptococcaceae;g__Streptococcus;s__Streptococcus gallolyticus_B	iPHoP-RF	97.1	None
contig002995	vOTU001151	RS_GCF_900101445.1	d__Bacteria;p__Bacillota;c__Bacilli;o__Lactobacillales;f__Streptococcaceae;g__Streptococcus;s__Streptococcus equinus_B	iPHoP-RF	97.1	None
contig002995	vOTU001151	RS_GCF_011039275.1	d__Bacteria;p__Bacillota;c__Bacilli;o__Lactobacillales;f__Streptococcaceae;g__Streptococcus;s__Streptococcus hyointestinalis_A	iPHoP-RF	96.7	None
contig002995	vOTU001151	RS_GCF_900459405.1	d__Bacteria;p__Bacillota;c__Bacilli;o__Lactobacillales;f__Streptococcaceae;g__Streptococcus;s__Streptococcus hyointestinalis	iPHoP-RF	96.7	None
contig002995	vOTU001151	RS_GCF_000188055.2	d__Bacteria;p__Bacillota;c__Bacilli;o__Lactobacillales;f__Streptococcaceae;g__Streptococcus;s__Streptococcus urinalis	iPHoP-RF	96.4	None
contig002995	vOTU001151	RS_GCF_001302265.1	d__Bacteria;p__Bacillota;c__Bacilli;o__Lactobacillales;f__Streptococcaceae;g__Streptococcus;s__Streptococcus phocae	iPHoP-RF	96.4	None
contig002995	vOTU001151	RS_GCF_019794555.1	d__Bacteria;p__Bacillota;c__Bacilli;o__Lactobacillales;f__Streptococcaceae;g__Streptococcus;s__Streptococcus suis_AB	iPHoP-RF	96.4	None
contig002995	vOTU001151	RS_GCF_900104225.1	d__Bacteria;p__Bacillota;c__Bacilli;o__Lactobacillales;f__Streptococcaceae;g__Streptococcus;s__Streptococcus equinus_D	iPHoP-RF	96.4	None
contig002995	vOTU001151	RS_GCF_901542335.1	d__Bacteria;p__Bacillota;c__Bacilli;o__Lactobacillales;f__Streptococcaceae;g__Streptococcus;s__Streptococcus porcinus_A	iPHoP-RF	96.4	None
contig002995	vOTU001151	RS_GCF_000187935.1	d__Bacteria;p__Bacillota;c__Bacilli;o__Lactobacillales;f__Streptococcaceae;g__Streptococcus;s__Streptococcus parauberis	iPHoP-RF	96.1	None
contig002995	vOTU001151	RS_GCF_000785785.1	d__Bacteria;p__Bacillota;c__Bacilli;o__Lactobacillales;f__Streptococcaceae;g__Streptococcus;s__Streptococcus uberis_A	iPHoP-RF	96.1	None
contig002995	vOTU001151	RS_GCF_002055535.1	d__Bacteria;p__Bacillota;c__Bacilli;o__Lactobacillales;f__Streptococcaceae;g__Streptococcus;s__Streptococcus pyogenes	iPHoP-RF	96.1	None
contig002995	vOTU001151	RS_GCF_900459225.1	d__Bacteria;p__Bacillota;c__Bacilli;o__Lactobacillales;f__Streptococcaceae;g__Streptococcus;s__Streptococcus dysgalactiae	iPHoP-RF	96.1	None
contig002995	vOTU001151	RS_GCF_003674745.1	d__Bacteria;p__Bacillota;c__Bacilli;o__Lactobacillales;f__Streptococcaceae;g__Streptococcus;s__Streptococcus iniae	iPHoP-RF	95.7	None
contig002995	vOTU001151	RS_GCF_015594605.1	d__Bacteria;p__Bacillota;c__Bacilli;o__Lactobacillales;f__Streptococcaceae;g__Streptococcus;s__Streptococcus sp015594605	iPHoP-RF	95.7	None
contig002995	vOTU001151	RS_GCF_900475415.1	d__Bacteria;p__Bacillota;c__Bacilli;o__Lactobacillales;f__Streptococcaceae;g__Streptococcus;s__Streptococcus porcinus	iPHoP-RF	95.4	None
contig002995	vOTU001151	GB_GCA_002436115.1	d__Bacteria;p__Bacillota;c__Bacilli;o__Lactobacillales;f__Streptococcaceae;g__Streptococcus;s__Streptococcus sp002436115	iPHoP-RF	95.1	None
contig002995	vOTU001151	RS_GCF_000188035.1	d__Bacteria;p__Bacillota;c__Bacilli;o__Lactobacillales;f__Streptococcaceae;g__Streptococcus;s__Streptococcus pseudoporcinus	iPHoP-RF	95.1	None
contig002995	vOTU001151	RS_GCF_000425025.1	d__Bacteria;p__Bacillota;c__Bacilli;o__Lactobacillales;f__Streptococcaceae;g__Streptococcus;s__Streptococcus castoreus	iPHoP-RF	95.1	None
contig002995	vOTU001151	RS_GCF_900475595.1	d__Bacteria;p__Bacillota;c__Bacilli;o__Lactobacillales;f__Streptococcaceae;g__Streptococcus;s__Streptococcus uberis	iPHoP-RF	95.1	None
contig002995	vOTU001151	RS_GCF_000380045.1	d__Bacteria;p__Bacillota;c__Bacilli;o__Lactobacillales;f__Streptococcaceae;g__Streptococcus;s__Streptococcus marimammalium	iPHoP-RF	94.7	None
contig002995	vOTU001151	RS_GCF_002953735.1	d__Bacteria;p__Bacillota;c__Bacilli;o__Lactobacillales;f__Streptococcaceae;g__Streptococcus;s__Streptococcus pluranimalium	iPHoP-RF	94.4	None
contig002995	vOTU001151	RS_GCF_001598035.1	d__Bacteria;p__Bacillota;c__Bacilli;o__Lactobacillales;f__Streptococcaceae;g__Streptococcus;s__Streptococcus halotolerans	iPHoP-RF	94.1	None
contig002995	vOTU001151	RS_GCF_000380145.1	d__Bacteria;p__Bacillota;c__Bacilli;o__Lactobacillales;f__Streptococcaceae;g__Streptococcus;s__Streptococcus thoraltensis	iPHoP-RF	93.7	None
contig002995	vOTU001151	RS_GCF_000420785.1	d__Bacteria;p__Bacillota;c__Bacilli;o__Lactobacillales;f__Streptococcaceae;g__Streptococcus;s__Streptococcus hyovaginalis	iPHoP-RF	93.4	None
contig002995	vOTU001151	RS_GCF_001578805.1	d__Bacteria;p__Bacillota;c__Bacilli;o__Lactobacillales;f__Streptococcaceae;g__Streptococcus;s__Streptococcus sp001578805	iPHoP-RF	93.4	None
contig002995	vOTU001151	RS_GCF_016481285.1	d__Bacteria;p__Bacillota;c__Bacilli;o__Lactobacillales;f__Streptococcaceae;g__Streptococcus;s__Streptococcus zalophi	iPHoP-RF	93.4	None
contig002995	vOTU001151	RS_GCF_024814375.1	d__Bacteria;p__Bacillota;c__Bacilli;o__Lactobacillales;f__Streptococcaceae;g__Streptococcus;s__Streptococcus sp024814375	iPHoP-RF	93.1	None
contig002995	vOTU001151	RS_GCF_001623565.1	d__Bacteria;p__Bacillota;c__Bacilli;o__Lactobacillales;f__Streptococcaceae;g__Streptococcus;s__Streptococcus marmotae	iPHoP-RF	92.4	None
contig002995	vOTU001151	RS_GCF_000380125.1	d__Bacteria;p__Bacillota;c__Bacilli;o__Lactobacillales;f__Streptococcaceae;g__Streptococcus;s__Streptococcus ovis	iPHoP-RF	92.1	None
contig002995	vOTU001151	RS_GCF_000376985.1	d__Bacteria;p__Bacillota;c__Bacilli;o__Lactobacillales;f__Streptococcaceae;g__Streptococcus;s__Streptococcus henryi	iPHoP-RF	91.1	None
contig002995	vOTU001151	RS_GCF_000380105.1	d__Bacteria;p__Bacillota;c__Bacilli;o__Lactobacillales;f__Streptococcaceae;g__Streptococcus;s__Streptococcus orisratti	iPHoP-RF	90.5	None
contig002995	vOTU001151	RS_GCF_000423765.1	d__Bacteria;p__Bacillota;c__Bacilli;o__Lactobacillales;f__Streptococcaceae;g__Streptococcus;s__Streptococcus porci	iPHoP-RF	90.5	None
contig002995	vOTU001151	RS_GCF_003686955.1	d__Bacteria;p__Bacillota;c__Bacilli;o__Lactobacillales;f__Streptococcaceae;g__Streptococcus;s__Streptococcus hillyeri	iPHoP-RF	90.5	None
contig002995	vOTU001151	RS_GCF_000423745.1	d__Bacteria;p__Bacillota;c__Bacilli;o__Lactobacillales;f__Streptococcaceae;g__Streptococcus;s__Streptococcus plurextorum	iPHoP-RF	90.1	None
contig003002	vOTU001154	GB_GCA_900112995.1	d__Bacteria;p__Bacillota_A;c__Clostridia;o__Lachnospirales;f__Lachnospiraceae;g__Lachnospira;s__Lachnospira rogosae	blast	96.6	iPHoP-RF;60.60
contig003003	vOTU001155	GB_GCA_944391885.1	d__Bacteria;p__Bacillota_A;c__Clostridia;o__TANB77;f__CAG-508;g__CAG-273;s__CAG-273 sp944391885	blast	93.7	iPHoP-RF;52.00
contig003006	vOTU001157	GB_GCA_025145845.1	d__Bacteria;p__Bacteroidota;c__Bacteroidia;o__Bacteroidales;f__Rikenellaceae;g__Alistipes;s__Alistipes shahii	CRISPR	97.6	iPHoP-RF;72.20
contig003006	vOTU001157	GB_GCA_902362705.1	d__Bacteria;p__Bacteroidota;c__Bacteroidia;o__Bacteroidales;f__Rikenellaceae;g__Alistipes;s__Alistipes sp002358415	iPHoP-RF	96.1	None
contig003006	vOTU001157	GB_GCA_910575495.1	d__Bacteria;p__Bacteroidota;c__Bacteroidia;o__Bacteroidales;f__Rikenellaceae;g__Alistipes;s__Alistipes sp910575495	iPHoP-RF	96.1	None
contig003006	vOTU001157	GB_GCA_910586375.1	d__Bacteria;p__Bacteroidota;c__Bacteroidia;o__Bacteroidales;f__Rikenellaceae;g__Alistipes;s__Alistipes sp910586375	iPHoP-RF	95.7	None
contig003006	vOTU001157	GB_GCA_019115605.1	d__Bacteria;p__Bacteroidota;c__Bacteroidia;o__Bacteroidales;f__Rikenellaceae;g__Alistipes;s__Alistipes faecigallinarum	CRISPR	95.6	iPHoP-RF;86.70
contig003006	vOTU001157	RS_GCF_002161445.1	d__Bacteria;p__Bacteroidota;c__Bacteroidia;o__Bacteroidales;f__Rikenellaceae;g__Alistipes;s__Alistipes cottocaccae	CRISPR	95.6	iPHoP-RF;88.50
contig003006	vOTU001157	GB_GCA_023443765.1	d__Bacteria;p__Bacteroidota;c__Bacteroidia;o__Bacteroidales;f__Rikenellaceae;g__Alistipes;s__Alistipes sp023443765	iPHoP-RF	95.4	None
contig003006	vOTU001157	GB_GCA_900553175.1	d__Bacteria;p__Bacteroidota;c__Bacteroidia;o__Bacteroidales;f__Rikenellaceae;g__Alistipes;s__Alistipes sp900553175	iPHoP-RF	95.1	None
contig003006	vOTU001157	RS_GCF_900290115.1	d__Bacteria;p__Bacteroidota;c__Bacteroidia;o__Bacteroidales;f__Rikenellaceae;g__Alistipes;s__Alistipes excrementigallinarum	iPHoP-RF	94.7	CRISPR;90.40
contig003006	vOTU001157	GB_GCA_910576555.1	d__Bacteria;p__Bacteroidota;c__Bacteroidia;o__Bacteroidales;f__Rikenellaceae;g__Alistipes;s__Alistipes sp910576555	iPHoP-RF	94.4	None
contig003006	vOTU001157	GB_GCA_944321755.1	d__Bacteria;p__Bacteroidota;c__Bacteroidia;o__Bacteroidales;f__Rikenellaceae;g__Alistipes;s__Alistipes sp944321755	iPHoP-RF	93.7	None
contig003006	vOTU001157	GB_GCA_905214725.1	d__Bacteria;p__Bacteroidota;c__Bacteroidia;o__Bacteroidales;f__Rikenellaceae;g__Alistipes;s__Alistipes sp905214725	iPHoP-RF	93.4	None
contig003006	vOTU001157	GB_GCA_900550375.1	d__Bacteria;p__Bacteroidota;c__Bacteroidia;o__Bacteroidales;f__Rikenellaceae;g__Alistipes;s__Alistipes sp900550375	iPHoP-RF	93.1	None
contig003006	vOTU001157	GB_GCA_900544265.1	d__Bacteria;p__Bacteroidota;c__Bacteroidia;o__Bacteroidales;f__Rikenellaceae;g__Alistipes;s__Alistipes merdavium	CRISPR	93	iPHoP-RF;86.00
contig003006	vOTU001157	RS_GCF_900604385.1	d__Bacteria;p__Bacteroidota;c__Bacteroidia;o__Bacteroidales;f__Rikenellaceae;g__Alistipes;s__Alistipes megaguti	iPHoP-RF	92.8	None
contig003006	vOTU001157	GB_GCA_944321205.1	d__Bacteria;p__Bacteroidota;c__Bacteroidia;o__Bacteroidales;f__Rikenellaceae;g__Alistipes;s__Alistipes sp944321205	iPHoP-RF	92.1	None
contig003006	vOTU001157	GB_GCA_900550925.1	d__Bacteria;p__Bacteroidota;c__Bacteroidia;o__Bacteroidales;f__Rikenellaceae;g__Alistipes;s__Alistipes sp900550925	blast	91.8	None
contig003006	vOTU001157	GB_GCA_944320665.1	d__Bacteria;p__Bacteroidota;c__Bacteroidia;o__Bacteroidales;f__Rikenellaceae;g__Alistipes;s__Alistipes sp944320665	blast	91.7	iPHoP-RF;80.00
contig003006	vOTU001157	GB_GCA_944321945.1	d__Bacteria;p__Bacteroidota;c__Bacteroidia;o__Bacteroidales;f__Rikenellaceae;g__Alistipes;s__Alistipes sp944321945	iPHoP-RF	91.4	None
contig003006	vOTU001157	MGYG000002203	d__Bacteria;p__Bacteroidota;c__Bacteroidia;o__Bacteroidales;f__Rikenellaceae;g__Alistipes;s__	iPHoP-RF	91.4	None
contig003006	vOTU001157	RS_GCF_018362775.1	d__Bacteria;p__Bacteroidota;c__Bacteroidia;o__Bacteroidales;f__Rikenellaceae;g__Alistipes;s__Alistipes montrealensis	iPHoP-RF	91.4	None
contig003006	vOTU001157	GB_GCA_900552955.1	d__Bacteria;p__Bacteroidota;c__Bacteroidia;o__Bacteroidales;f__Rikenellaceae;g__Alistipes;s__Alistipes sp900552955	iPHoP-RF	91.1	None
contig003006	vOTU001157	GB_GCA_022782405.1	d__Bacteria;p__Bacteroidota;c__Bacteroidia;o__Bacteroidales;f__Rikenellaceae;g__Alistipes;s__Alistipes sp022782405	iPHoP-RF	90.8	None
contig003006	vOTU001157	GB_GCA_025145285.1	d__Bacteria;p__Bacteroidota;c__Bacteroidia;o__Bacteroidales;f__Rikenellaceae;g__Alistipes;s__Alistipes onderdonkii	iPHoP-RF	90.8	None
contig003006	vOTU001157	GB_GCA_900541585.1	d__Bacteria;p__Bacteroidota;c__Bacteroidia;o__Bacteroidales;f__Rikenellaceae;g__Alistipes;s__Alistipes sp900541585	iPHoP-RF	90.8	None
contig003006	vOTU001157	GB_GCA_944321965.1	d__Bacteria;p__Bacteroidota;c__Bacteroidia;o__Bacteroidales;f__Rikenellaceae;g__Alistipes;s__Alistipes sp944321965	iPHoP-RF	90.8	None
contig003006	vOTU001157	RS_GCF_000265365.1	d__Bacteria;p__Bacteroidota;c__Bacteroidia;o__Bacteroidales;f__Rikenellaceae;g__Alistipes;s__Alistipes finegoldii	iPHoP-RF	90.8	None
contig003006	vOTU001157	GB_GCA_020026455.1	d__Bacteria;p__Bacteroidota;c__Bacteroidia;o__Bacteroidales;f__Rikenellaceae;g__Alistipes;s__Alistipes sp020026455	iPHoP-RF	90.5	None
contig003007	vOTU001158	GB_GCA_900543805.1	d__Bacteria;p__Pseudomonadota;c__Gammaproteobacteria;o__Burkholderiales;f__Burkholderiaceae_A;g__Sutterella;s__Sutterella merdavium	CRISPR	99.5	iPHoP-RF;91.40 blast;91.10
contig003007	vOTU001158	GB_GCA_900545275.1	d__Bacteria;p__Pseudomonadota;c__Gammaproteobacteria;o__Burkholderiales;f__Burkholderiaceae_A;g__Sutterella;s__Sutterella sp900545275	CRISPR	99.5	iPHoP-RF;85.70
contig003007	vOTU001158	MGYG000004187	d__Bacteria;p__Pseudomonadota;c__Gammaproteobacteria;o__Burkholderiales;f__Burkholderiaceae_A;g__Sutterella;s__	iPHoP-RF	94.7	None
contig003007	vOTU001158	RS_GCF_000297775.1	d__Bacteria;p__Pseudomonadota;c__Gammaproteobacteria;o__Burkholderiales;f__Burkholderiaceae_A;g__Sutterella;s__Sutterella wadsworthensis_A	iPHoP-RF	93.7	None
contig003007	vOTU001158	RS_GCF_016899755.1	d__Bacteria;p__Pseudomonadota;c__Gammaproteobacteria;o__Burkholderiales;f__Burkholderiaceae_A;g__Sutterella;s__Sutterella massiliensis	iPHoP-RF	93.7	None
contig003007	vOTU001158	RS_GCF_000250875.1	d__Bacteria;p__Pseudomonadota;c__Gammaproteobacteria;o__Burkholderiales;f__Burkholderiaceae_A;g__Sutterella;s__Sutterella parvirubra	iPHoP-RF	93.4	None
contig003007	vOTU001158	GB_GCA_934249275.1	d__Bacteria;p__Pseudomonadota;c__Gammaproteobacteria;o__Burkholderiales;f__Burkholderiaceae_A;g__Sutterella;s__Sutterella sp934249275	iPHoP-RF	92.8	None
contig003007	vOTU001158	GB_GCA_944392755.1	d__Bacteria;p__Pseudomonadota;c__Gammaproteobacteria;o__Burkholderiales;f__Burkholderiaceae_A;g__Sutterella;s__Sutterella sp944392755	iPHoP-RF	92.1	None
contig003012	vOTU001163	RS_GCF_000239295.1	d__Bacteria;p__Bacillota_A;c__Clostridia;o__Oscillospirales;f__Oscillospiraceae;g__Flavonifractor;s__Flavonifractor plautii	blast	91.7	None
contig003031	vOTU001171	GB_GCA_900545755.1	d__Bacteria;p__Synergistota;c__Synergistia;o__Synergistales;f__Synergistaceae;g__Caccocola;s__Caccocola sp900545755	blast	91.5	None
contig003039	vOTU001174	RS_GCF_002160915.1	d__Bacteria;p__Bacillota_A;c__Clostridia;o__Oscillospirales;f__Ruminococcaceae;g__Faecalibacterium;s__Faecalibacterium avium	blast	96.8	iPHoP-RF;66.80
contig003039	vOTU001174	GB_GCA_019119685.1	d__Bacteria;p__Bacillota_A;c__Clostridia;o__Oscillospirales;f__Ruminococcaceae;g__Faecalibacterium;s__Faecalibacterium faecigallinarum	blast	96	CRISPR;91.40
contig003039	vOTU001174	GB_GCA_019116585.1	d__Bacteria;p__Bacillota_A;c__Clostridia;o__Oscillospirales;f__Ruminococcaceae;g__Faecalibacterium;s__Faecalibacterium gallistercoris	CRISPR	94.6	iPHoP-RF;50.20
contig003039	vOTU001174	RS_GCF_020687245.1	d__Bacteria;p__Bacillota_A;c__Clostridia;o__Oscillospirales;f__Ruminococcaceae;g__Faecalibacterium;s__Faecalibacterium longum	CRISPR	94.6	iPHoP-RF;71.10
contig003039	vOTU001174	RS_GCF_010509575.1	d__Bacteria;p__Bacillota_A;c__Clostridia;o__Oscillospirales;f__Ruminococcaceae;g__Faecalibacterium;s__Faecalibacterium duncaniae	CRISPR	93.5	iPHoP-RF;84.80
contig003039	vOTU001174	GB_GCA_944386015.1	d__Bacteria;p__Bacillota_A;c__Clostridia;o__Oscillospirales;f__Ruminococcaceae;g__Faecalibacterium;s__Faecalibacterium sp944386015	blast	93.4	iPHoP-RF;64.30
contig003039	vOTU001174	GB_GCA_904394215.1	d__Bacteria;p__Bacillota_A;c__Clostridia;o__Oscillospirales;f__Ruminococcaceae;g__Faecalibacterium;s__Faecalibacterium sp904394215	blast	92.1	iPHoP-RF;63.30
contig003039	vOTU001174	GB_GCA_018883885.1	d__Bacteria;p__Bacillota_A;c__Clostridia;o__Oscillospirales;f__Ruminococcaceae;g__Faecalibacterium;s__Faecalibacterium intestinavium	blast	90.8	iPHoP-RF;75.90
contig003039	vOTU001174	RS_GCF_022180365.1	d__Bacteria;p__Bacillota_A;c__Clostridia;o__Oscillospirales;f__Ruminococcaceae;g__Faecalibacterium;s__Faecalibacterium gallinarum	blast	90.1	iPHoP-RF;71.30
contig003047	vOTU001180	RS_GCF_005121165.3	d__Bacteria;p__Bacillota_A;c__Clostridia;o__Oscillospirales;f__Oscillospiraceae;g__Dysosmobacter;s__Dysosmobacter welbionis	iPHoP-RF	94.4	None
contig003047	vOTU001180	RS_GCF_018228705.1	d__Bacteria;p__Bacillota_A;c__Clostridia;o__Oscillospirales;f__Oscillospiraceae;g__Dysosmobacter;s__Dysosmobacter sp018228705	blast	93.9	iPHoP-RF;82.50
contig003047	vOTU001180	GB_GCA_905200545.1	d__Bacteria;p__Bacillota_A;c__Clostridia;o__Oscillospirales;f__Oscillospiraceae;g__Dysosmobacter;s__Dysosmobacter sp905200545	blast	93.4	iPHoP-RF;80.00
contig003047	vOTU001180	GB_GCA_019118245.1	d__Bacteria;p__Bacillota_A;c__Clostridia;o__Oscillospirales;f__Oscillospiraceae;g__Dysosmobacter;s__Dysosmobacter excrementigallinarum	iPHoP-RF	93.1	None
contig003047	vOTU001180	GB_GCA_019118935.1	d__Bacteria;p__Bacillota_A;c__Clostridia;o__Oscillospirales;f__Oscillospiraceae;g__Dysosmobacter;s__Dysosmobacter pullicola	iPHoP-RF	92.4	None
contig003047	vOTU001180	GB_GCA_019418625.1	d__Bacteria;p__Bacillota_A;c__Clostridia;o__Oscillospirales;f__Oscillospiraceae;g__Dysosmobacter;s__Dysosmobacter sp019418625	blast	92.2	iPHoP-RF;77.10
contig003047	vOTU001180	GB_GCA_000436875.1	d__Bacteria;p__Bacillota_A;c__Clostridia;o__Oscillospirales;f__Oscillospiraceae;g__Dysosmobacter;s__Dysosmobacter sp000436875	blast	92	iPHoP-RF;77.80
contig003047	vOTU001180	GB_GCA_944387015.1	d__Bacteria;p__Bacillota_A;c__Clostridia;o__Oscillospirales;f__Oscillospiraceae;g__Dysosmobacter;s__Dysosmobacter sp944387015	blast	92	iPHoP-RF;83.10
contig003047	vOTU001180	GB_GCA_944387035.1	d__Bacteria;p__Bacillota_A;c__Clostridia;o__Oscillospirales;f__Oscillospiraceae;g__Dysosmobacter;s__Dysosmobacter sp944387035	blast	92	iPHoP-RF;75.40
contig003047	vOTU001180	GB_GCA_900551885.1	d__Bacteria;p__Bacillota_A;c__Clostridia;o__Oscillospirales;f__Oscillospiraceae;g__Dysosmobacter;s__Dysosmobacter sp900551885	blast	90.4	iPHoP-RF;88.20
contig003070	vOTU001186	RS_GCF_000156655.1	d__Bacteria;p__Bacillota;c__Bacilli;o__Erysipelotrichales;f__Erysipelotrichaceae;g__Holdemanella;s__Holdemanella biformis	blast	91.1	iPHoP-RF;65.30
contig003072	vOTU001187	RS_GCF_002161175.1	d__Bacteria;p__Bacillota_A;c__Clostridia;o__Oscillospirales;f__Oscillospiraceae;g__Lawsonibacter;s__Lawsonibacter sp002161175	blast	91.9	None
contig003072	vOTU001187	GB_GCA_905215425.1	d__Bacteria;p__Bacillota_A;c__Clostridia;o__Oscillospirales;f__Oscillospiraceae;g__Lawsonibacter;s__Lawsonibacter sp905215425	blast	90.2	iPHoP-RF;62.20
contig003072	vOTU001187	GB_GCA_003573975.1	d__Bacteria;p__Bacillota_A;c__Clostridia;o__Oscillospirales;f__Oscillospiraceae;g__Lawsonibacter;s__Lawsonibacter sp900066825	blast	90	None
contig003073	vOTU001188	GB_GCA_944391865.1	d__Bacteria;p__Bacillota_A;c__Clostridia;o__TANB77;f__CAG-508;g__CAG-452;s__CAG-452 sp944391865	blast	90.8	None
contig003073	vOTU001188	GB_GCA_017472015.1	d__Bacteria;p__Bacillota;c__Bacilli;o__RF39;f__UBA660;g__RUG591;s__RUG591 sp017472015	blast	90	iPHoP-RF;57.30
contig003075	vOTU001189	GB_GCA_000435395.1	d__Bacteria;p__Bacillota_A;c__Clostridia;o__Oscillospirales;f__Acutalibacteraceae;g__Acutalibacter;s__Acutalibacter ornithocaccae	CRISPR	98.8	blast;93.90 iPHoP-RF;79.80
contig003075	vOTU001189	GB_GCA_019112625.1	d__Bacteria;p__Bacillota_A;c__Clostridia;o__Oscillospirales;f__Acutalibacteraceae;g__Acutalibacter;s__Acutalibacter stercorigallinarum	CRISPR	94.1	iPHoP-RF;76.40
contig003075	vOTU001189	GB_GCA_900543305.1	d__Bacteria;p__Bacillota_A;c__Clostridia;o__Oscillospirales;f__Acutalibacteraceae;g__Acutalibacter;s__Acutalibacter sp900543305	blast	93.5	iPHoP-RF;79.00
contig003075	vOTU001189	GB_GCA_009917445.1	d__Bacteria;p__Bacillota_A;c__Clostridia;o__Oscillospirales;f__Acutalibacteraceae;g__Acutalibacter;s__Acutalibacter sp009917445	iPHoP-RF	92.8	None
contig003075	vOTU001189	RS_GCF_009936035.1	d__Bacteria;p__Bacillota_A;c__Clostridia;o__Oscillospirales;f__Acutalibacteraceae;g__Acutalibacter;s__Acutalibacter sp009936035	iPHoP-RF	92.8	None
contig003075	vOTU001189	GB_GCA_900543555.1	d__Bacteria;p__Bacillota_A;c__Clostridia;o__Oscillospirales;f__Acutalibacteraceae;g__Acutalibacter;s__Acutalibacter stercoravium	blast	91.3	iPHoP-RF;87.60
contig003075	vOTU001189	GB_GCA_904374805.1	d__Bacteria;p__Bacillota_A;c__Clostridia;o__Oscillospirales;f__Acutalibacteraceae;g__Acutalibacter;s__Acutalibacter pullicola	CRISPR	90.1	iPHoP-RF;77.80
contig003080	vOTU001190	GB_GCA_944325045.1	d__Bacteria;p__Cyanobacteriota;c__Vampirovibrionia;o__Gastranaerophilales;f__Gastranaerophilaceae;g__UBA1221;s__UBA1221 sp944325045	blast	93.2	None
contig003080	vOTU001190	GB_GCA_944326115.1	d__Bacteria;p__Cyanobacteriota;c__Vampirovibrionia;o__Gastranaerophilales;f__Gastranaerophilaceae;g__Limenecus;s__Limenecus sp944326115	blast	90.9	None
contig003082	vOTU001192	RS_GCF_002161085.1	d__Bacteria;p__Bacillota_A;c__Clostridia;o__Oscillospirales;f__Oscillospiraceae;g__Flavonifractor;s__Flavonifractor avicola	blast	96	iPHoP-RF;90.80
contig003082	vOTU001192	RS_GCF_002159265.1	d__Bacteria;p__Bacillota_A;c__Clostridia;o__Oscillospirales;f__Oscillospiraceae;g__Flavonifractor;s__Flavonifractor sp002159265	blast	93.9	iPHoP-RF;88.50
contig003082	vOTU001192	GB_GCA_022785125.1	d__Bacteria;p__Bacillota_A;c__Clostridia;o__Oscillospirales;f__Oscillospiraceae;g__Flavonifractor;s__Flavonifractor sp022785125	blast	91.7	iPHoP-RF;88.90
contig003082	vOTU001192	GB_GCA_944385615.1	d__Bacteria;p__Bacillota_A;c__Clostridia;o__Oscillospirales;f__Oscillospiraceae;g__Flavonifractor;s__Flavonifractor sp944385615	iPHoP-RF	91.1	blast;91.00
contig003082	vOTU001192	GB_GCA_944385625.1	d__Bacteria;p__Bacillota_A;c__Clostridia;o__Oscillospirales;f__Oscillospiraceae;g__Flavonifractor;s__Flavonifractor sp944385625	blast	90.4	iPHoP-RF;82.80
contig003084	vOTU001193	GB_GCA_900759875.1	d__Bacteria;p__Bacillota;c__Bacilli;o__RF39;f__UBA660;g__RUG705;s__RUG705 sp900759875	blast	93	iPHoP-RF;60.60
contig003094	vOTU001197	RS_GCF_900128475.1	d__Bacteria;p__Bacteroidota;c__Bacteroidia;o__Bacteroidales;f__Bacteroidaceae;g__Mediterranea;s__Mediterranea massiliensis	CRISPR	99	blast;96.60 iPHoP-RF;94.70
contig003094	vOTU001197	RS_GCF_019239235.1	d__Bacteria;p__Bacteroidota;c__Bacteroidia;o__Bacteroidales;f__Bacteroidaceae;g__Mediterranea;s__Mediterranea pullorum	CRISPR	98.9	blast;96.80 iPHoP-RF;94.70
contig003094	vOTU001197	RS_GCF_000012825.1	d__Bacteria;p__Bacteroidota;c__Bacteroidia;o__Bacteroidales;f__Bacteroidaceae;g__Phocaeicola;s__Phocaeicola vulgatus	CRISPR	98.6	iPHoP-RF;80.30
contig003094	vOTU001197	RS_GCF_013009555.1	d__Bacteria;p__Bacteroidota;c__Bacteroidia;o__Bacteroidales;f__Bacteroidaceae;g__Phocaeicola;s__Phocaeicola dorei	CRISPR	98.6	iPHoP-RF;80.30
contig003094	vOTU001197	GB_GCA_025146565.1	d__Bacteria;p__Bacteroidota;c__Bacteroidia;o__Bacteroidales;f__Bacteroidaceae;g__Bacteroides;s__Bacteroides eggerthii	CRISPR	98.5	iPHoP-RF;75.20
contig003094	vOTU001197	GB_GCA_900553185.1	d__Bacteria;p__Bacteroidota;c__Bacteroidia;o__Bacteroidales;f__Bacteroidaceae;g__Phocaeicola;s__Phocaeicola sp900553185	CRISPR	98.1	iPHoP-RF;73.00
contig003094	vOTU001197	GB_GCA_000432735.1	d__Bacteria;p__Bacteroidota;c__Bacteroidia;o__Bacteroidales;f__Bacteroidaceae;g__Phocaeicola;s__Phocaeicola sp000432735	CRISPR	97.8	iPHoP-RF;74.60
contig003094	vOTU001197	MGYG000004188	d__Bacteria;p__Bacteroidota;c__Bacteroidia;o__Bacteroidales;f__Bacteroidaceae;g__Mediterranea;s__	iPHoP-RF	95.7	None
contig003094	vOTU001197	MGYG000171082	d__Bacteria;p__Bacteroidota;c__Bacteroidia;o__Bacteroidales;f__Bacteroidaceae;g__Mediterranea;s__	iPHoP-RF	94.4	None
contig003094	vOTU001197	MGYG000172350	d__Bacteria;p__Bacteroidota;c__Bacteroidia;o__Bacteroidales;f__Bacteroidaceae;g__Mediterranea;s__	iPHoP-RF	94.1	blast;89.60
contig003098	vOTU001199	3300014826_6	d__Bacteria;p__Patescibacteria;c__JAEDAM01;o__Absconditabacterales;f__Absconditicoccaceae;g__HOT-345;s__	blast	92.2	None
contig003104	vOTU001202	GB_GCA_944325175.1	d__Bacteria;p__Cyanobacteriota;c__Vampirovibrionia;o__Gastranaerophilales;f__RUG14156;g__Galligastranaerophilus_A;s__Galligastranaerophilus_A sp944325175	blast	93.8	iPHoP-RF;73.00
contig003104	vOTU001202	GB_GCA_944325145.1	d__Bacteria;p__Cyanobacteriota;c__Vampirovibrionia;o__Gastranaerophilales;f__RUG14156;g__Galligastranaerophilus_A;s__Galligastranaerophilus_A sp944325145	blast	93.7	iPHoP-RF;73.00
contig003105	vOTU001203	GB_GCA_934728355.1	d__Bacteria;p__Bacillota_A;c__Clostridia;o__Oscillospirales;f__Acutalibacteraceae;g__UMGS1491;s__UMGS1491 sp934728355	blast	93.1	None
contig003105	vOTU001203	GB_GCA_934725345.1	d__Bacteria;p__Bacillota_A;c__Clostridia;o__Oscillospirales;f__Acutalibacteraceae;g__UMGS1491;s__UMGS1491 sp934725345	blast	92	None
contig003106	vOTU001204	GB_GCA_900542985.1	d__Bacteria;p__Bacteroidota;c__Bacteroidia;o__Bacteroidales;f__Bacteroidaceae;g__Phocaeicola;s__Phocaeicola sp900542985	iPHoP-RF	96.4	blast;95.00
contig003106	vOTU001204	GB_GCA_902362595.1	d__Bacteria;p__Bacteroidota;c__Bacteroidia;o__Bacteroidales;f__Bacteroidaceae;g__Phocaeicola;s__Phocaeicola merdigallinarum	iPHoP-RF	96.4	blast;92.10
contig003106	vOTU001204	RS_GCF_000154845.1	d__Bacteria;p__Bacteroidota;c__Bacteroidia;o__Bacteroidales;f__Bacteroidaceae;g__Phocaeicola;s__Phocaeicola coprocola	CRISPR	96.2	iPHoP-RF;93.70
contig003106	vOTU001204	GB_GCA_000436795.1	d__Bacteria;p__Bacteroidota;c__Bacteroidia;o__Bacteroidales;f__Bacteroidaceae;g__Phocaeicola;s__Phocaeicola sp000436795	iPHoP-RF	96.1	None
contig003106	vOTU001204	GB_GCA_019414725.1	d__Bacteria;p__Bacteroidota;c__Bacteroidia;o__Bacteroidales;f__Bacteroidaceae;g__Phocaeicola;s__Phocaeicola sp019414725	iPHoP-RF	95.4	None
contig003106	vOTU001204	GB_GCA_944320885.1	d__Bacteria;p__Bacteroidota;c__Bacteroidia;o__Bacteroidales;f__Bacteroidaceae;g__Phocaeicola_A;s__Phocaeicola_A sp944320885	iPHoP-RF	92.1	None
contig003106	vOTU001204	RS_GCF_016902295.1	d__Bacteria;p__Bacteroidota;c__Bacteroidia;o__Bacteroidales;f__Bacteroidaceae;g__Phocaeicola;s__Phocaeicola caecigallinarum_A	iPHoP-RF	92.1	None
contig003106	vOTU001204	GB_GCA_020026175.1	d__Bacteria;p__Bacteroidota;c__Bacteroidia;o__Bacteroidales;f__Bacteroidaceae;g__Phocaeicola;s__Phocaeicola sp020026175	blast	90.8	iPHoP-RF;77.80
contig003106	vOTU001204	GB_GCA_018884025.1	d__Bacteria;p__Bacteroidota;c__Bacteroidia;o__Bacteroidales;f__Bacteroidaceae;g__Phocaeicola;s__Phocaeicola faecipullorum	iPHoP-RF	90.5	None
contig003113	vOTU013698	GB_GCA_905215805.1	d__Bacteria;p__Bacillota_A;c__Clostridia;o__UBA1381;f__UBA1381;g__UBA4716;s__UBA4716 sp905215805	blast	92.9	iPHoP-RF;65.30
contig003113	vOTU013698	GB_GCA_018714695.1	d__Bacteria;p__Bacillota_A;c__Clostridia;o__UBA1381;f__UBA1381;g__Ornithomonoglobus;s__Ornithomonoglobus merdipullorum	blast	92	iPHoP-RF;68.90
contig003113	vOTU013698	GB_GCA_904420525.1	d__Bacteria;p__Bacillota_A;c__Clostridia;o__UBA1381;f__UBA1381;g__Ornithomonoglobus;s__Ornithomonoglobus sp904420525	blast	90.2	iPHoP-RF;52.00
contig003122	vOTU029888	RS_GCF_012843875.1	d__Bacteria;p__Desulfobacterota;c__Desulfovibrionia;o__Desulfovibrionales;f__Desulfovibrionaceae;g__Desulfovibrio;s__Desulfovibrio sp900556755	blast	96.2	iPHoP-RF;83.30
contig003122	vOTU029888	GB_GCA_017396005.1	d__Bacteria;p__Desulfobacterota;c__Desulfovibrionia;o__Desulfovibrionales;f__Desulfovibrionaceae;g__Desulfovibrio;s__Desulfovibrio sp017396005	iPHoP-RF	94.4	blast;85.90
contig003122	vOTU029888	RS_GCF_000156375.1	d__Bacteria;p__Desulfobacterota;c__Desulfovibrionia;o__Desulfovibrionales;f__Desulfovibrionaceae;g__Desulfovibrio;s__Desulfovibrio piger	blast	93.7	iPHoP-RF;82.50
contig003122	vOTU029888	MGYG000002687	d__Bacteria;p__Desulfobacterota;c__Desulfovibrionia;o__Desulfovibrionales;f__Desulfovibrionaceae;g__Desulfovibrio;s__	blast	92.7	iPHoP-RF;87.60
contig003122	vOTU029888	GB_GCA_944324555.1	d__Bacteria;p__Desulfobacterota;c__Desulfovibrionia;o__Desulfovibrionales;f__Desulfovibrionaceae;g__Desulfovibrio;s__Desulfovibrio sp944324555	blast	91.7	iPHoP-RF;80.80
contig003122	vOTU029888	RS_GCF_900116045.1	d__Bacteria;p__Desulfobacterota;c__Desulfovibrionia;o__Desulfovibrionales;f__Desulfovibrionaceae;g__Desulfovibrio;s__Desulfovibrio piger_A	blast	90.2	iPHoP-RF;81.60
contig003122	vOTU029888	MGYG000179013	d__Bacteria;p__Desulfobacterota;c__Desulfovibrionia;o__Desulfovibrionales;f__Desulfovibrionaceae;g__Desulfovibrio;s__	blast	90	iPHoP-RF;87.00
contig003125	vOTU139075	GB_GCA_944390275.1	d__Bacteria;p__Pseudomonadota;c__Alphaproteobacteria;o__RF32;f__CAG-239;g__HGM16780;s__HGM16780 sp944390275	blast	93.9	iPHoP-RF;73.90
contig003125	vOTU139075	GB_GCA_944391395.1	d__Bacteria;p__Pseudomonadota;c__Alphaproteobacteria;o__RF32;f__CAG-239;g__CAAFZY01;s__CAAFZY01 sp944391395	blast	91	None
contig003125	vOTU139075	GB_GCA_001917175.1	d__Bacteria;p__Pseudomonadota;c__Alphaproteobacteria;o__RF32;f__CAG-239;g__51-20;s__51-20 sp001917175	blast	90.6	iPHoP-RF;70.00
contig003125	vOTU139075	GB_GCA_944391375.1	d__Bacteria;p__Pseudomonadota;c__Alphaproteobacteria;o__RF32;f__CAG-239;g__CAAFZY01;s__CAAFZY01 sp944391375	blast	90.6	None
contig003134	vOTU001217	GB_GCA_000435395.1	d__Bacteria;p__Bacillota_A;c__Clostridia;o__Oscillospirales;f__Acutalibacteraceae;g__Acutalibacter;s__Acutalibacter ornithocaccae	blast	92.3	None
contig003134	vOTU001217	GB_GCA_900317855.1	d__Bacteria;p__Bacillota_A;c__Clostridia;o__Oscillospirales;f__Oscillospiraceae;g__CAG-103;s__CAG-103 sp900317855	blast	91.9	None
contig003135	vOTU001218	RS_GCF_004343035.1	d__Bacteria;p__Bacillota;c__Bacilli;o__Erysipelotrichales;f__Coprobacillaceae;g__Longibaculum;s__Longibaculum muris	blast	93.4	None
contig003135	vOTU001218	RS_GCF_002160815.1	d__Bacteria;p__Bacillota;c__Bacilli;o__Erysipelotrichales;f__Coprobacillaceae;g__Massilimicrobiota;s__Massilimicrobiota merdigallinarum	blast	92	None
contig003135	vOTU001218	GB_GCA_024399475.1	d__Bacteria;p__Bacillota;c__Bacilli;o__Erysipelotrichales;f__Coprobacillaceae;g__Massilimicrobiota;s__Massilimicrobiota sp024399475	blast	91.9	None
contig003135	vOTU001218	RS_GCF_002160865.1	d__Bacteria;p__Bacillota;c__Bacilli;o__Erysipelotrichales;f__Coprobacillaceae;g__Massilimicrobiota;s__Massilimicrobiota sp002160865	blast	91.9	None
contig003135	vOTU001218	GB_GCA_944326805.1	d__Bacteria;p__Bacillota;c__Bacilli;o__Erysipelotrichales;f__Coprobacillaceae;g__Massilimicrobiota;s__Massilimicrobiota sp944326805	blast	91.8	None
contig003135	vOTU001218	RS_GCF_001244545.1	d__Bacteria;p__Bacillota;c__Bacilli;o__Erysipelotrichales;f__Coprobacillaceae;g__Stoquefichus;s__Stoquefichus sp001244545	blast	90.2	None
contig003141	vOTU001221	RS_GCF_002160755.1	d__Bacteria;p__Bacillota_A;c__Clostridia;o__Lachnospirales;f__Lachnospiraceae;g__Lachnoclostridium_A;s__Lachnoclostridium_A sp002160755	CRISPR	97.2	iPHoP-RF;60.60
contig003141	vOTU001221	GB_GCA_001304875.1	d__Bacteria;p__Bacillota_A;c__Clostridia;o__Lachnospirales;f__Lachnospiraceae;g__Ventrisoma;s__Ventrisoma faecale	CRISPR	96.8	iPHoP-RF;76.80
contig003141	vOTU001221	GB_GCA_019118365.1	d__Bacteria;p__Bacillota_A;c__Clostridia;o__Lachnospirales;f__Lachnospiraceae;g__Lachnoclostridium_A;s__Lachnoclostridium_A stercoravium	CRISPR	94.1	None
contig003146	vOTU001223	GB_GCA_019112765.1	d__Bacteria;p__Bacillota_A;c__Clostridia;o__Lachnospirales;f__Lachnospiraceae;g__Mediterraneibacter;s__Mediterraneibacter norwichensis	CRISPR	97.9	iPHoP-RF;93.40
contig003146	vOTU001223	GB_GCA_019117305.1	d__Bacteria;p__Bacillota_A;c__Clostridia;o__Lachnospirales;f__Lachnospiraceae;g__Mediterraneibacter;s__Mediterraneibacter merdigallinarum	CRISPR	97.1	iPHoP-RF;95.10 blast;90.10
contig003146	vOTU001223	GB_GCA_019115385.1	d__Bacteria;p__Bacillota_A;c__Clostridia;o__Lachnospirales;f__Lachnospiraceae;g__Mediterraneibacter;s__Mediterraneibacter avicola	CRISPR	94.7	iPHoP-RF;93.40 blast;93.40
contig003146	vOTU001223	GB_GCA_900553885.1	d__Bacteria;p__Bacillota_A;c__Clostridia;o__Lachnospirales;f__Lachnospiraceae;g__Mediterraneibacter;s__Mediterraneibacter sp900553885	iPHoP-RF	94.7	blast;90.00
contig003146	vOTU001223	MGYG000319793	d__Bacteria;p__Bacillota_A;c__Clostridia;o__Lachnospirales;f__Lachnospiraceae;g__Mediterraneibacter;s__	blast	94.3	iPHoP-RF;90.50
contig003146	vOTU001223	GB_GCA_019119745.1	d__Bacteria;p__Bacillota_A;c__Clostridia;o__Lachnospirales;f__Lachnospiraceae;g__Mediterraneibacter;s__Mediterraneibacter gallistercoris	blast	93.7	iPHoP-RF;63.00
contig003146	vOTU001223	GB_GCA_019118665.1	d__Bacteria;p__Bacillota_A;c__Clostridia;o__Lachnospirales;f__Lachnospiraceae;g__Mediterraneibacter;s__Mediterraneibacter intestinipullorum	blast	92.1	iPHoP-RF;86.30
contig003146	vOTU001223	GB_GCA_944383695.1	d__Bacteria;p__Bacillota_A;c__Clostridia;o__Lachnospirales;f__Lachnospiraceae;g__Mediterraneibacter;s__Mediterraneibacter sp944383695	blast	92	iPHoP-RF;90.80
contig003146	vOTU001223	GB_GCA_944381495.1	d__Bacteria;p__Bacillota_A;c__Clostridia;o__Lachnospirales;f__Lachnospiraceae;g__Mediterraneibacter;s__Mediterraneibacter sp944381495	blast	91	iPHoP-RF;85.70
contig003146	vOTU001223	GB_GCA_900761655.1	d__Bacteria;p__Bacillota_A;c__Clostridia;o__Lachnospirales;f__Lachnospiraceae;g__Mediterraneibacter;s__Mediterraneibacter sp900761655	blast	90.5	iPHoP-RF;83.60
contig003146	vOTU001223	GB_GCA_019113645.1	d__Bacteria;p__Bacillota_A;c__Clostridia;o__Lachnospirales;f__Lachnospiraceae;g__Mediterraneibacter;s__Mediterraneibacter vanvlietii	blast	90.4	iPHoP-RF;61.40
contig003161	vOTU001230	GB_GCA_900754775.1	d__Bacteria;p__Bacillota_A;c__Clostridia;o__Christensenellales;f__CAG-74;g__Pullichristensenella;s__Pullichristensenella excrementipullorum	CRISPR	96.1	iPHoP-RF;76.40
contig003161	vOTU001230	MGYG000315210	d__Bacteria;p__Bacillota_A;c__Clostridia;o__Christensenellales;f__CAG-74;g__Pullichristensenella;s__	blast	93.6	iPHoP-RF;79.00
contig003161	vOTU001230	GB_GCA_019409045.1	d__Bacteria;p__Bacillota_A;c__Clostridia;o__Christensenellales;f__CAG-74;g__Pullichristensenella;s__Pullichristensenella sp019409045	blast	93.5	iPHoP-RF;77.10
contig003179	vOTU001240	GB_GCA_944386665.1	d__Bacteria;p__Bacillota_A;c__Clostridia;o__TANB77;f__CAG-508;g__CAG-245;s__CAG-245 sp944386665	blast	93.2	iPHoP-RF;71.10
contig003192	vOTU001245	GB_GCA_934589665.1	d__Bacteria;p__Bacillota_A;c__Clostridia;o__Oscillospirales;f__Oscillospiraceae;g__ER4;s__ER4 sp934589665	CRISPR	93.8	None
contig003204	vOTU001252	GB_GCA_944364075.1	d__Bacteria;p__Bacillota_A;c__Clostridia;o__Christensenellales;f__CAG-74;g__Egerieenecus;s__Egerieenecus sp944364075	CRISPR	99	blast;93.00 iPHoP-RF;66.80
contig003204	vOTU001252	GB_GCA_900553295.1	d__Bacteria;p__Bacillota_A;c__Clostridia;o__Christensenellales;f__CAG-74;g__Egerieenecus;s__Egerieenecus merdigallinarum	CRISPR	98.1	blast;95.40 iPHoP-RF;73.50
contig003204	vOTU001252	GB_GCA_015056415.1	d__Bacteria;p__Bacillota_A;c__Clostridia;o__Christensenellales;f__CAG-74;g__UBA11524;s__UBA11524 sp015056415	blast	90.1	iPHoP-RF;78.70
contig003206	vOTU001254	RS_GCF_000157975.1	d__Bacteria;p__Bacillota_A;c__Clostridia;o__Lachnospirales;f__Lachnospiraceae;g__Blautia_A;s__Blautia_A hydrogenotrophica	blast	95.4	iPHoP-RF;85.10
contig003206	vOTU001254	GB_GCA_900765525.1	d__Bacteria;p__Bacillota_A;c__Clostridia;o__Lachnospirales;f__Lachnospiraceae;g__Blautia;s__Blautia pullicola	blast	93.1	iPHoP-RF;56.50
contig003206	vOTU001254	GB_GCA_019112785.1	d__Bacteria;p__Bacillota_A;c__Clostridia;o__Lachnospirales;f__Lachnospiraceae;g__Blautia;s__Blautia stercorigallinarum	CRISPR	92.8	iPHoP-RF;66.00
contig003206	vOTU001254	MGYG000309299	d__Bacteria;p__Bacillota_A;c__Clostridia;o__Lachnospirales;f__Lachnospiraceae;g__Ruminococcus_G;s__	blast	92	None
contig003217	vOTU130699	GB_GCA_018715585.1	d__Bacteria;p__Bacillota_A;c__Clostridia;o__Christensenellales;f__CAG-74;g__Aphodomonas;s__Aphodomonas merdavium	blast	91.9	iPHoP-RF;57.10
contig003219	vOTU001258	GB_GCA_019118545.1	d__Bacteria;p__Bacillota_A;c__Clostridia;o__Lachnospirales;f__Lachnospiraceae;g__Mediterraneibacter;s__Mediterraneibacter merdavium	CRISPR	99	blast;92.00 iPHoP-RF;85.40
contig003219	vOTU001258	GB_GCA_019117065.1	d__Bacteria;p__Bacillota_A;c__Clostridia;o__Lachnospirales;f__Lachnospiraceae;g__Mediterraneibacter;s__Mediterraneibacter pullicola	CRISPR	98.7	iPHoP-RF;87.60
contig003219	vOTU001258	GB_GCA_944377705.1	d__Bacteria;p__Bacillota_A;c__Clostridia;o__Lachnospirales;f__Lachnospiraceae;g__Mediterraneibacter;s__Mediterraneibacter sp944377705	blast	93.5	iPHoP-RF;69.10
contig003219	vOTU001258	GB_GCA_944383695.1	d__Bacteria;p__Bacillota_A;c__Clostridia;o__Lachnospirales;f__Lachnospiraceae;g__Mediterraneibacter;s__Mediterraneibacter sp944383695	blast	92.5	iPHoP-RF;65.30
contig003219	vOTU001258	GB_GCA_900761655.1	d__Bacteria;p__Bacillota_A;c__Clostridia;o__Lachnospirales;f__Lachnospiraceae;g__Mediterraneibacter;s__Mediterraneibacter sp900761655	blast	91.5	iPHoP-RF;82.50
contig003219	vOTU001258	MGYG000314054	d__Bacteria;p__Bacillota_A;c__Clostridia;o__Lachnospirales;f__Lachnospiraceae;g__Mediterraneibacter;s__	blast	90.5	iPHoP-RF;50.90
contig003219	vOTU001258	GB_GCA_019113645.1	d__Bacteria;p__Bacillota_A;c__Clostridia;o__Lachnospirales;f__Lachnospiraceae;g__Mediterraneibacter;s__Mediterraneibacter vanvlietii	blast	90.4	iPHoP-RF;57.10
contig003219	vOTU001258	GB_GCA_019120075.1	d__Bacteria;p__Bacillota_A;c__Clostridia;o__Lachnospirales;f__Lachnospiraceae;g__Mediterraneibacter;s__Mediterraneibacter excrementigallinarum	blast	90.2	None
contig003224	vOTU138867	GB_GCA_019116805.1	d__Bacteria;p__Bacteroidota;c__Bacteroidia;o__Bacteroidales;f__Bacteroidaceae;g__Mediterranea;s__Mediterranea merdavium	blast	93.7	None
contig003227	vOTU001263	RS_GCF_000469305.1	d__Bacteria;p__Bacillota;c__Bacilli;o__Erysipelotrichales;f__Erysipelotrichaceae;g__Faecalitalea;s__Faecalitalea cylindroides	blast	91.1	iPHoP-RF;69.80
contig003228	vOTU001264	GB_GCA_018714045.1	d__Bacteria;p__Bacillota_A;c__Clostridia;o__Christensenellales;f__UBA3700;g__Ornithoclostridium;s__Ornithoclostridium faecavium	CRISPR	92.2	None
contig003238	vOTU001270	GB_GCA_000435395.1	d__Bacteria;p__Bacillota_A;c__Clostridia;o__Oscillospirales;f__Acutalibacteraceae;g__Acutalibacter;s__Acutalibacter ornithocaccae	CRISPR	96.8	None
contig003238	vOTU001270	GB_GCA_019112625.1	d__Bacteria;p__Bacillota_A;c__Clostridia;o__Oscillospirales;f__Acutalibacteraceae;g__Acutalibacter;s__Acutalibacter stercorigallinarum	CRISPR	95.6	iPHoP-RF;53.80
contig003240	vOTU001272	GB_GCA_944385585.1	d__Bacteria;p__Bacillota_A;c__Clostridia;o__Oscillospirales;f__Oscillospiraceae;g__Flavonifractor;s__Flavonifractor sp944385585	CRISPR	97.4	iPHoP-RF;78.50
contig003240	vOTU001272	GB_GCA_002404795.1	d__Bacteria;p__Bacillota_A;c__Clostridia;o__Oscillospirales;f__Oscillospiraceae;g__CAG-170;s__CAG-170 sp002404795	blast	90.7	iPHoP-RF;57.30
contig003240	vOTU001272	GB_GCA_900555855.1	d__Bacteria;p__Bacillota_A;c__Clostridia;o__Oscillospirales;f__Butyricicoccaceae;g__UBA4644;s__UBA4644 sp900555855	blast	90.5	None
contig003240	vOTU001272	GB_GCA_000432135.1	d__Bacteria;p__Bacillota_A;c__Clostridia;o__Oscillospirales;f__Oscillospiraceae;g__CAG-170;s__CAG-170 sp000432135	blast	90.3	None
contig003240	vOTU001272	GB_GCA_900545925.1	d__Bacteria;p__Bacillota_A;c__Clostridia;o__Oscillospirales;f__Oscillospiraceae;g__CAG-170;s__CAG-170 sp900545925	blast	90.3	None
contig003242	vOTU001273	GB_GCA_000432735.1	d__Bacteria;p__Bacteroidota;c__Bacteroidia;o__Bacteroidales;f__Bacteroidaceae;g__Phocaeicola;s__Phocaeicola sp000432735	CRISPR	98.9	iPHoP-RF;76.60
contig003242	vOTU001273	RS_GCF_002161765.1	d__Bacteria;p__Bacteroidota;c__Bacteroidia;o__Bacteroidales;f__Bacteroidaceae;g__Phocaeicola;s__Phocaeicola sp002161765	CRISPR	98.9	iPHoP-RF;73.90
contig003242	vOTU001273	RS_GCF_000154845.1	d__Bacteria;p__Bacteroidota;c__Bacteroidia;o__Bacteroidales;f__Bacteroidaceae;g__Phocaeicola;s__Phocaeicola coprocola	CRISPR	98.8	iPHoP-RF;74.60
contig003242	vOTU001273	RS_GCF_003437535.1	d__Bacteria;p__Bacteroidota;c__Bacteroidia;o__Bacteroidales;f__Bacteroidaceae;g__Phocaeicola;s__Phocaeicola plebeius_A	CRISPR	98.7	iPHoP-RF;74.80
contig003242	vOTU001273	RS_GCF_016900355.1	d__Bacteria;p__Bacteroidota;c__Bacteroidia;o__Bacteroidales;f__Bacteroidaceae;g__Phocaeicola;s__Phocaeicola sp900551065	CRISPR	98.7	iPHoP-RF;83.10
contig003242	vOTU001273	RS_GCF_016901995.1	d__Bacteria;p__Bacteroidota;c__Bacteroidia;o__Bacteroidales;f__Bacteroidaceae;g__Phocaeicola;s__Phocaeicola sp900066445	CRISPR	98.6	iPHoP-RF;62.50
contig003242	vOTU001273	RS_GCF_000157915.1	d__Bacteria;p__Bacteroidota;c__Bacteroidia;o__Bacteroidales;f__Bacteroidaceae;g__Phocaeicola;s__Phocaeicola coprophilus	CRISPR	98.5	iPHoP-RF;73.20
contig003242	vOTU001273	RS_GCF_000374585.1	d__Bacteria;p__Bacteroidota;c__Bacteroidia;o__Bacteroidales;f__Bacteroidaceae;g__Phocaeicola;s__Phocaeicola barnesiae	CRISPR	98.3	iPHoP-RF;74.10
contig003242	vOTU001273	RS_GCF_013009555.1	d__Bacteria;p__Bacteroidota;c__Bacteroidia;o__Bacteroidales;f__Bacteroidaceae;g__Phocaeicola;s__Phocaeicola dorei	CRISPR	98.2	iPHoP-RF;66.00
contig003242	vOTU001273	RS_GCF_019239235.1	d__Bacteria;p__Bacteroidota;c__Bacteroidia;o__Bacteroidales;f__Bacteroidaceae;g__Mediterranea;s__Mediterranea pullorum	CRISPR	92.2	iPHoP-RF;75.00
contig003244	vOTU001274	RS_GCF_000382445.1	d__Bacteria;p__Bacteroidota;c__Bacteroidia;o__Bacteroidales;f__Bacteroidaceae;g__Phocaeicola;s__Phocaeicola massiliensis	CRISPR	97.6	None
contig003244	vOTU001274	GB_GCA_000613465.1	d__Bacteria;p__Bacteroidota;c__Bacteroidia;o__Bacteroidales;f__Bacteroidaceae;g__Bacteroides;s__Bacteroides nordii	CRISPR	96.9	None
contig003244	vOTU001274	RS_GCF_000012825.1	d__Bacteria;p__Bacteroidota;c__Bacteroidia;o__Bacteroidales;f__Bacteroidaceae;g__Phocaeicola;s__Phocaeicola vulgatus	CRISPR	96.3	None
contig003244	vOTU001274	RS_GCF_002222615.2	d__Bacteria;p__Bacteroidota;c__Bacteroidia;o__Bacteroidales;f__Bacteroidaceae;g__Bacteroides;s__Bacteroides caccae	CRISPR	95	None
contig003244	vOTU001274	RS_GCF_001314995.1	d__Bacteria;p__Bacteroidota;c__Bacteroidia;o__Bacteroidales;f__Bacteroidaceae;g__Bacteroides;s__Bacteroides ovatus	CRISPR	94.5	None
contig003244	vOTU001274	GB_GCA_902362595.1	d__Bacteria;p__Bacteroidota;c__Bacteroidia;o__Bacteroidales;f__Bacteroidaceae;g__Phocaeicola;s__Phocaeicola merdigallinarum	CRISPR	94.3	iPHoP-RF;81.90
contig003244	vOTU001274	GB_GCA_019412865.1	d__Bacteria;p__Bacteroidota;c__Bacteroidia;o__Bacteroidales;f__Bacteroidaceae;g__Bacteroides;s__Bacteroides sp019412865	CRISPR	94.2	None
contig003268	vOTU001286	RS_GCF_000012825.1	d__Bacteria;p__Bacteroidota;c__Bacteroidia;o__Bacteroidales;f__Bacteroidaceae;g__Phocaeicola;s__Phocaeicola vulgatus	CRISPR	99.5	iPHoP-RF;91.80
contig003268	vOTU001286	RS_GCF_002161765.1	d__Bacteria;p__Bacteroidota;c__Bacteroidia;o__Bacteroidales;f__Bacteroidaceae;g__Phocaeicola;s__Phocaeicola sp002161765	CRISPR	99.5	iPHoP-RF;82.50
contig003268	vOTU001286	RS_GCF_016901995.1	d__Bacteria;p__Bacteroidota;c__Bacteroidia;o__Bacteroidales;f__Bacteroidaceae;g__Phocaeicola;s__Phocaeicola sp900066445	CRISPR	99.4	iPHoP-RF;93.10
contig003268	vOTU001286	RS_GCF_021530995.1	d__Bacteria;p__Bacteroidota;c__Bacteroidia;o__Bacteroidales;f__Bacteroidaceae;g__Phocaeicola;s__Phocaeicola faecigallinarum	CRISPR	99.4	iPHoP-RF;91.80
contig003268	vOTU001286	RS_GCF_900108345.1	d__Bacteria;p__Bacteroidota;c__Bacteroidia;o__Bacteroidales;f__Bacteroidaceae;g__Mediterranea;s__Mediterranea ndongoniae	CRISPR	99.2	iPHoP-RF;86.70
contig003268	vOTU001286	GB_GCA_025147485.1	d__Bacteria;p__Bacteroidota;c__Bacteroidia;o__Bacteroidales;f__Bacteroidaceae;g__Bacteroides;s__Bacteroides uniformis	CRISPR	99.1	iPHoP-RF;94.40
contig003268	vOTU001286	GB_GCA_900553185.1	d__Bacteria;p__Bacteroidota;c__Bacteroidia;o__Bacteroidales;f__Bacteroidaceae;g__Phocaeicola;s__Phocaeicola sp900553185	CRISPR	99	iPHoP-RF;92.80
contig003268	vOTU001286	GB_GCA_902362595.1	d__Bacteria;p__Bacteroidota;c__Bacteroidia;o__Bacteroidales;f__Bacteroidaceae;g__Phocaeicola;s__Phocaeicola merdigallinarum	CRISPR	99	iPHoP-RF;93.70
contig003268	vOTU001286	RS_GCF_000154845.1	d__Bacteria;p__Bacteroidota;c__Bacteroidia;o__Bacteroidales;f__Bacteroidaceae;g__Phocaeicola;s__Phocaeicola coprocola	CRISPR	99	iPHoP-RF;86.00
contig003268	vOTU001286	RS_GCF_000157915.1	d__Bacteria;p__Bacteroidota;c__Bacteroidia;o__Bacteroidales;f__Bacteroidaceae;g__Phocaeicola;s__Phocaeicola coprophilus	CRISPR	99	iPHoP-RF;82.50
contig003268	vOTU001286	RS_GCF_000187895.1	d__Bacteria;p__Bacteroidota;c__Bacteroidia;o__Bacteroidales;f__Bacteroidaceae;g__Phocaeicola;s__Phocaeicola plebeius	CRISPR	99	iPHoP-RF;88.90
contig003268	vOTU001286	RS_GCF_000374585.1	d__Bacteria;p__Bacteroidota;c__Bacteroidia;o__Bacteroidales;f__Bacteroidaceae;g__Phocaeicola;s__Phocaeicola barnesiae	CRISPR	99	iPHoP-RF;94.40
contig003268	vOTU001286	RS_GCF_003437535.1	d__Bacteria;p__Bacteroidota;c__Bacteroidia;o__Bacteroidales;f__Bacteroidaceae;g__Phocaeicola;s__Phocaeicola plebeius_A	CRISPR	99	iPHoP-RF;91.80
contig003268	vOTU001286	MGYG000250372	d__Bacteria;p__Bacteroidota;c__Bacteroidia;o__Bacteroidales;f__Bacteroidaceae;g__Phocaeicola;s__	iPHoP-RF	94.4	None
contig003268	vOTU001286	RS_GCF_021730445.1	d__Bacteria;p__Bacteroidota;c__Bacteroidia;o__Bacteroidales;f__Bacteroidaceae;g__Phocaeicola;s__Phocaeicola faecalis	iPHoP-RF	94.4	None
contig003268	vOTU001286	GB_GCA_900760795.1	d__Bacteria;p__Bacteroidota;c__Bacteroidia;o__Bacteroidales;f__Bacteroidaceae;g__Phocaeicola;s__Phocaeicola sp900760795	iPHoP-RF	94.1	None
contig003268	vOTU001286	RS_GCF_000382445.1	d__Bacteria;p__Bacteroidota;c__Bacteroidia;o__Bacteroidales;f__Bacteroidaceae;g__Phocaeicola;s__Phocaeicola massiliensis	iPHoP-RF	94.1	None
contig003268	vOTU001286	GB_GCA_019417975.1	d__Bacteria;p__Bacteroidota;c__Bacteroidia;o__Bacteroidales;f__Bacteroidaceae;g__OM05-12;s__OM05-12 sp019417975	iPHoP-RF	93.7	None
contig003268	vOTU001286	GB_GCA_900546645.1	d__Bacteria;p__Bacteroidota;c__Bacteroidia;o__Bacteroidales;f__Bacteroidaceae;g__Phocaeicola;s__Phocaeicola sp900546645	iPHoP-RF	93.7	None
contig003268	vOTU001286	RS_GCF_000156195.1	d__Bacteria;p__Bacteroidota;c__Bacteroidia;o__Bacteroidales;f__Bacteroidaceae;g__Bacteroides;s__Bacteroides finegoldii	iPHoP-RF	92.8	None
contig003268	vOTU001286	RS_GCF_009193325.2	d__Bacteria;p__Bacteroidota;c__Bacteroidia;o__Bacteroidales;f__Bacteroidaceae;g__Bacteroides;s__Bacteroides zhangwenhongii	iPHoP-RF	92.4	None
contig003268	vOTU001286	RS_GCF_001688725.2	d__Bacteria;p__Bacteroidota;c__Bacteroidia;o__Bacteroidales;f__Bacteroidaceae;g__Bacteroides;s__Bacteroides caecimuris	iPHoP-RF	91.8	None
contig003268	vOTU001286	GB_GCA_900766195.1	d__Bacteria;p__Bacteroidota;c__Bacteroidia;o__Bacteroidales;f__Bacteroidaceae;g__Bacteroides;s__Bacteroides sp900766195	iPHoP-RF	91.4	None
contig003268	vOTU001286	RS_GCF_014334015.1	d__Bacteria;p__Bacteroidota;c__Bacteroidia;o__Bacteroidales;f__Bacteroidaceae;g__Bacteroides;s__Bacteroides intestinigallinarum	iPHoP-RF	91.1	None
contig003268	vOTU001286	RS_GCF_001314995.1	d__Bacteria;p__Bacteroidota;c__Bacteroidia;o__Bacteroidales;f__Bacteroidaceae;g__Bacteroides;s__Bacteroides ovatus	iPHoP-RF	90.1	None
contig003271	vOTU001289	RS_GCF_002161285.1	d__Bacteria;p__Bacillota_A;c__Clostridia;o__Lachnospirales;f__Lachnospiraceae;g__Blautia;s__Blautia ornithocaccae	blast	96.6	None
contig003271	vOTU001289	GB_GCA_019118885.1	d__Bacteria;p__Bacillota_A;c__Clostridia;o__Lachnospirales;f__Lachnospiraceae;g__Mediterraneibacter;s__Mediterraneibacter surreyensis	blast	91.9	iPHoP-RF;54.40
contig003275	vOTU001291	GB_GCA_019119745.1	d__Bacteria;p__Bacillota_A;c__Clostridia;o__Lachnospirales;f__Lachnospiraceae;g__Mediterraneibacter;s__Mediterraneibacter gallistercoris	blast	94.1	iPHoP-RF;81.40 CRISPR;68.50
contig003275	vOTU001291	GB_GCA_019119675.1	d__Bacteria;p__Bacillota_A;c__Clostridia;o__Lachnospirales;f__Lachnospiraceae;g__Mediterraneibacter;s__Mediterraneibacter faecipullorum	blast	93.7	iPHoP-RF;82.80
contig003275	vOTU001291	GB_GCA_900555215.1	d__Bacteria;p__Bacillota_A;c__Clostridia;o__Lachnospirales;f__Lachnospiraceae;g__Mediterraneibacter;s__Mediterraneibacter excrementipullorum	blast	93	iPHoP-RF;83.90
contig003275	vOTU001291	GB_GCA_944383695.1	d__Bacteria;p__Bacillota_A;c__Clostridia;o__Lachnospirales;f__Lachnospiraceae;g__Mediterraneibacter;s__Mediterraneibacter sp944383695	blast	92.5	iPHoP-RF;85.10
contig003275	vOTU001291	MGYG000052100	d__Bacteria;p__Bacillota_A;c__Clostridia;o__Lachnospirales;f__Lachnospiraceae;g__Schaedlerella;s__	iPHoP-RF	92.4	None
contig003275	vOTU001291	MGYG000052887	d__Bacteria;p__Bacillota_A;c__Clostridia;o__Lachnospirales;f__Lachnospiraceae;g__Schaedlerella;s__	iPHoP-RF	92.4	None
contig003275	vOTU001291	GB_GCA_019118545.1	d__Bacteria;p__Bacillota_A;c__Clostridia;o__Lachnospirales;f__Lachnospiraceae;g__Mediterraneibacter;s__Mediterraneibacter merdavium	blast	92.3	iPHoP-RF;84.80
contig003275	vOTU001291	GB_GCA_019117305.1	d__Bacteria;p__Bacillota_A;c__Clostridia;o__Lachnospirales;f__Lachnospiraceae;g__Mediterraneibacter;s__Mediterraneibacter merdigallinarum	CRISPR	91.8	iPHoP-RF;80.30
contig003275	vOTU001291	GB_GCA_900553885.1	d__Bacteria;p__Bacillota_A;c__Clostridia;o__Lachnospirales;f__Lachnospiraceae;g__Mediterraneibacter;s__Mediterraneibacter sp900553885	CRISPR	90.7	iPHoP-RF;80.80
contig003275	vOTU001291	GB_GCA_019120595.1	d__Bacteria;p__Bacillota_A;c__Clostridia;o__Lachnospirales;f__Lachnospiraceae;g__Mediterraneibacter;s__Mediterraneibacter tabaqchaliae	CRISPR	90.4	iPHoP-RF;80.00
contig003290	vOTU001879	RS_GCF_017347605.1	d__Bacteria;p__Bacteroidota;c__Bacteroidia;o__Bacteroidales;f__Bacteroidaceae;g__Prevotella;s__Prevotella herbatica	iPHoP-RF	90.5	None
contig003315	vOTU001299	GB_GCA_904419785.1	d__Bacteria;p__Bacillota_A;c__Clostridia;o__Oscillospirales;f__Acutalibacteraceae;g__Acutalibacter;s__Acutalibacter sp904419785	blast	91.7	iPHoP-RF;73.90
contig003315	vOTU001299	RS_GCF_002161085.1	d__Bacteria;p__Bacillota_A;c__Clostridia;o__Oscillospirales;f__Oscillospiraceae;g__Flavonifractor;s__Flavonifractor avicola	blast	90.5	iPHoP-RF;59.20
contig003321	vOTU001300	GB_GCA_018712245.1	d__Bacteria;p__Bacillota_A;c__Clostridia;o__Oscillospirales;f__Oscillospiraceae;g__Avoscillospira;s__Avoscillospira avicola	blast	93.8	iPHoP-RF;80.00
contig003321	vOTU001300	GB_GCA_018713205.1	d__Bacteria;p__Bacillota_A;c__Clostridia;o__Oscillospirales;f__Oscillospiraceae;g__Avoscillospira;s__Avoscillospira stercorigallinarum	blast	93.7	iPHoP-RF;83.60
contig003355	vOTU001310	GB_GCA_944385585.1	d__Bacteria;p__Bacillota_A;c__Clostridia;o__Oscillospirales;f__Oscillospiraceae;g__Flavonifractor;s__Flavonifractor sp944385585	CRISPR	92.1	None
contig003359	vOTU001311	GB_GCA_902388655.1	d__Bacteria;p__Pseudomonadota;c__Gammaproteobacteria;o__Burkholderiales;f__Burkholderiaceae_A;g__Aphodousia;s__Aphodousia sp902388655	blast	94.8	iPHoP-RF;70.60
contig003359	vOTU001311	RS_GCF_023336895.1	d__Bacteria;p__Pseudomonadota;c__Gammaproteobacteria;o__Burkholderiales;f__Burkholderiaceae_A;g__Aphodousia;s__Aphodousia secunda_B	blast	94.6	iPHoP-RF;91.40 CRISPR;86.00
contig003359	vOTU001311	GB_GCA_905212345.1	d__Bacteria;p__Pseudomonadota;c__Gammaproteobacteria;o__Burkholderiales;f__Burkholderiaceae_A;g__Aphodousia;s__Aphodousia sp905212345	blast	93.4	iPHoP-RF;91.40
contig003359	vOTU001311	GB_GCA_905201055.1	d__Bacteria;p__Pseudomonadota;c__Gammaproteobacteria;o__Burkholderiales;f__Burkholderiaceae_A;g__Aphodousia;s__Aphodousia sp905201055	blast	91.6	iPHoP-RF;65.60
contig003376	vOTU001319	GB_GCA_900557315.1	d__Bacteria;p__Bacillota_A;c__Clostridia;o__Oscillospirales;f__Butyricicoccaceae;g__Agathobaculum;s__Agathobaculum sp900557315	blast	92	iPHoP-RF;50.90
contig003417	vOTU001333	GB_GCA_944387755.1	d__Bacteria;p__Bacillota_A;c__Clostridia;o__Oscillospirales;f__Oscillospiraceae;g__Lawsonibacter;s__Lawsonibacter sp944387755	blast	91.4	iPHoP-RF;55.40
contig003438	vOTU001339	GB_GCA_900045905.1	d__Bacteria;p__Bacillota_A;c__Clostridia;o__Lachnospirales;f__Lachnospiraceae;g__Fimimorpha;s__Fimimorpha sp900045905	CRISPR	98.3	None
contig003438	vOTU001339	GB_GCA_018712075.1	d__Bacteria;p__Bacillota_A;c__Clostridia;o__Lachnospirales;f__Lachnospiraceae;g__Fimimorpha;s__Fimimorpha faecalis	CRISPR	98.1	None
contig003447	vOTU001341	GB_GCA_944381575.1	d__Bacteria;p__Bacillota_A;c__Clostridia;o__Lachnospirales;f__Lachnospiraceae;g__Avilachnospira;s__Avilachnospira sp944381575	blast	90.9	None
contig003456	vOTU001344	RS_GCF_000469305.1	d__Bacteria;p__Bacillota;c__Bacilli;o__Erysipelotrichales;f__Erysipelotrichaceae;g__Faecalitalea;s__Faecalitalea cylindroides	blast	93.5	iPHoP-RF;74.60
contig003476	vOTU001349	GB_GCA_002504495.1	d__Archaea;p__Thermoplasmatota;c__Thermoplasmata;o__Methanomassiliicoccales;f__Methanomethylophilaceae;g__UBA71;s__UBA71 sp002504495	iPHoP-RF	91.8	None
contig003476	vOTU001349	GB_GCA_017475875.1	d__Archaea;p__Thermoplasmatota;c__Thermoplasmata;o__Methanomassiliicoccales;f__Methanomethylophilaceae;g__UBA71;s__UBA71 sp017475875	iPHoP-RF	91.8	None
contig003476	vOTU001349	GB_GCA_017540825.1	d__Archaea;p__Thermoplasmatota;c__Thermoplasmata;o__Methanomassiliicoccales;f__Methanomethylophilaceae;g__UBA71;s__UBA71 sp017540825	iPHoP-RF	91.1	None
contig003476	vOTU001349	GB_GCA_017519045.1	d__Archaea;p__Thermoplasmatota;c__Thermoplasmata;o__Methanomassiliicoccales;f__Methanomethylophilaceae;g__UBA71;s__UBA71 sp017519045	iPHoP-RF	90.8	None
contig003476	vOTU001349	GB_GCA_015063165.1	d__Archaea;p__Thermoplasmatota;c__Thermoplasmata;o__Methanomassiliicoccales;f__Methanomethylophilaceae;g__UBA71;s__UBA71 sp015063165	iPHoP-RF	90.1	None
contig003485	vOTU001354	GB_GCA_944386665.1	d__Bacteria;p__Bacillota_A;c__Clostridia;o__TANB77;f__CAG-508;g__CAG-245;s__CAG-245 sp944386665	blast	93.2	iPHoP-RF;55.40
contig003493	vOTU001356	GB_GCA_002432025.1	d__Bacteria;p__Elusimicrobiota;c__Elusimicrobia;o__Elusimicrobiales;f__Elusimicrobiaceae;g__UBA1436;s__UBA1436 sp002432025	iPHoP-RF	95.7	None
contig003493	vOTU001356	GB_GCA_945483375.1	d__Bacteria;p__Elusimicrobiota;c__Elusimicrobia;o__Elusimicrobiales;f__Elusimicrobiaceae;g__UBA1436;s__UBA1436 sp945483375	iPHoP-RF	95.7	None
contig003493	vOTU001356	GB_GCA_944325225.1	d__Bacteria;p__Elusimicrobiota;c__Elusimicrobia;o__Elusimicrobiales;f__Elusimicrobiaceae;g__UBA1436;s__UBA1436 sp944325225	iPHoP-RF	95.4	None
contig003493	vOTU001356	GB_GCA_017525025.1	d__Bacteria;p__Elusimicrobiota;c__Elusimicrobia;o__Elusimicrobiales;f__Elusimicrobiaceae;g__UBA1436;s__UBA1436 sp017525025	iPHoP-RF	94.4	None
contig003493	vOTU001356	GB_GCA_900541355.1	d__Bacteria;p__Elusimicrobiota;c__Elusimicrobia;o__Elusimicrobiales;f__Elusimicrobiaceae;g__UBA1436;s__UBA1436 sp900541355	iPHoP-RF	94.4	None
contig003493	vOTU001356	GB_GCA_902794125.1	d__Bacteria;p__Elusimicrobiota;c__Elusimicrobia;o__Elusimicrobiales;f__Elusimicrobiaceae;g__UBA1436;s__UBA1436 sp902794125	iPHoP-RF	94.4	None
contig003493	vOTU001356	GB_GCA_934667625.1	d__Bacteria;p__Elusimicrobiota;c__Elusimicrobia;o__Elusimicrobiales;f__Elusimicrobiaceae;g__UBA1436;s__UBA1436 sp934667625	iPHoP-RF	94.4	None
contig003493	vOTU001356	GB_GCA_944327085.1	d__Bacteria;p__Elusimicrobiota;c__Elusimicrobia;o__Elusimicrobiales;f__Elusimicrobiaceae;g__UBA1436;s__UBA1436 sp944327085	blast	94.3	iPHoP-RF;92.10
contig003493	vOTU001356	GB_GCA_900319325.1	d__Bacteria;p__Elusimicrobiota;c__Elusimicrobia;o__Elusimicrobiales;f__Elusimicrobiaceae;g__UBA1436;s__UBA1436 sp900319325	iPHoP-RF	94.1	None
contig003493	vOTU001356	GB_GCA_944324655.1	d__Bacteria;p__Elusimicrobiota;c__Elusimicrobia;o__Elusimicrobiales;f__Elusimicrobiaceae;g__UBA1436;s__UBA1436 sp944324655	iPHoP-RF	94.1	blast;91.10
contig003493	vOTU001356	GB_GCA_002329395.1	d__Bacteria;p__Elusimicrobiota;c__Elusimicrobia;o__Elusimicrobiales;f__Elusimicrobiaceae;g__UBA1436;s__UBA1436 sp002329395	iPHoP-RF	93.7	None
contig003493	vOTU001356	GB_GCA_944324965.1	d__Bacteria;p__Elusimicrobiota;c__Elusimicrobia;o__Elusimicrobiales;f__Elusimicrobiaceae;g__UBA1436;s__UBA1436 sp944324965	iPHoP-RF	93.4	None
contig003493	vOTU001356	MGYG000301769	d__Bacteria;p__Elusimicrobiota;c__Elusimicrobia;o__Elusimicrobiales;f__Elusimicrobiaceae;g__UBA1436;s__	iPHoP-RF	93.4	None
contig003493	vOTU001356	GB_GCA_015062115.1	d__Bacteria;p__Elusimicrobiota;c__Elusimicrobia;o__Elusimicrobiales;f__Elusimicrobiaceae;g__UBA1436;s__UBA1436 sp015062115	iPHoP-RF	93.1	None
contig003493	vOTU001356	GB_GCA_902798835.1	d__Bacteria;p__Elusimicrobiota;c__Elusimicrobia;o__Elusimicrobiales;f__Elusimicrobiaceae;g__UBA1436;s__UBA1436 sp902798835	iPHoP-RF	93.1	None
contig003493	vOTU001356	GB_GCA_944322825.1	d__Bacteria;p__Elusimicrobiota;c__Elusimicrobia;o__Elusimicrobiales;f__Elusimicrobiaceae;g__UBA1436;s__UBA1436 sp944322825	iPHoP-RF	93.1	None
contig003493	vOTU001356	GB_GCA_017468055.1	d__Bacteria;p__Elusimicrobiota;c__Elusimicrobia;o__Elusimicrobiales;f__Elusimicrobiaceae;g__Avelusimicrobium;s__Avelusimicrobium sp017468055	iPHoP-RF	92.8	None
contig003493	vOTU001356	GB_GCA_944324635.1	d__Bacteria;p__Elusimicrobiota;c__Elusimicrobia;o__Elusimicrobiales;f__Elusimicrobiaceae;g__UBA1436;s__UBA1436 sp944324635	iPHoP-RF	92.4	None
contig003493	vOTU001356	GB_GCA_944325235.1	d__Bacteria;p__Elusimicrobiota;c__Elusimicrobia;o__Elusimicrobiales;f__Elusimicrobiaceae;g__UBA1436;s__UBA1436 sp944325235	iPHoP-RF	92.4	None
contig003493	vOTU001356	GB_GCA_944324735.1	d__Bacteria;p__Elusimicrobiota;c__Elusimicrobia;o__Elusimicrobiales;f__Elusimicrobiaceae;g__UBA1436;s__UBA1436 sp944324735	blast	92.1	iPHoP-RF;77.50 CRISPR;57.30
contig003493	vOTU001356	GB_GCA_910576915.1	d__Bacteria;p__Elusimicrobiota;c__Elusimicrobia;o__Elusimicrobiales;f__Elusimicrobiaceae;g__UBA1436;s__UBA1436 sp910576915	iPHoP-RF	91.8	None
contig003493	vOTU001356	RS_GCF_002159705.1	d__Bacteria;p__Elusimicrobiota;c__Elusimicrobia;o__Elusimicrobiales;f__Elusimicrobiaceae;g__UBA1436;s__UBA1436 sp002159705	iPHoP-RF	91.4	None
contig003497	vOTU001358	RS_GCF_013009555.1	d__Bacteria;p__Bacteroidota;c__Bacteroidia;o__Bacteroidales;f__Bacteroidaceae;g__Phocaeicola;s__Phocaeicola dorei	CRISPR	97.9	iPHoP-RF;83.30
contig003497	vOTU001358	RS_GCF_019239235.1	d__Bacteria;p__Bacteroidota;c__Bacteroidia;o__Bacteroidales;f__Bacteroidaceae;g__Mediterranea;s__Mediterranea pullorum	CRISPR	97.9	iPHoP-RF;90.10 blast;89.60
contig003497	vOTU001358	RS_GCF_900128475.1	d__Bacteria;p__Bacteroidota;c__Bacteroidia;o__Bacteroidales;f__Bacteroidaceae;g__Mediterranea;s__Mediterranea massiliensis	blast	97.9	CRISPR;97.20 iPHoP-RF;92.80
contig003497	vOTU001358	GB_GCA_944320845.1	d__Bacteria;p__Bacteroidota;c__Bacteroidia;o__Bacteroidales;f__Bacteroidaceae;g__Phocaeicola;s__Phocaeicola sp944320845	CRISPR	97.3	iPHoP-RF;73.70
contig003497	vOTU001358	RS_GCF_000158035.1	d__Bacteria;p__Bacteroidota;c__Bacteroidia;o__Bacteroidales;f__Bacteroidaceae;g__Bacteroides;s__Bacteroides cellulosilyticus	CRISPR	95.9	iPHoP-RF;76.10
contig003497	vOTU001358	RS_GCF_002161765.1	d__Bacteria;p__Bacteroidota;c__Bacteroidia;o__Bacteroidales;f__Bacteroidaceae;g__Phocaeicola;s__Phocaeicola sp002161765	CRISPR	95.7	blast;84.40 iPHoP-RF;64.30
contig003497	vOTU001358	GB_GCA_944319875.1	d__Bacteria;p__Bacteroidota;c__Bacteroidia;o__Bacteroidales;f__Bacteroidaceae;g__Mediterranea;s__Mediterranea sp944319875	blast	95.6	iPHoP-RF;58.20
contig003497	vOTU001358	GB_GCA_900553815.1	d__Bacteria;p__Bacteroidota;c__Bacteroidia;o__Bacteroidales;f__Bacteroidaceae;g__Mediterranea;s__Mediterranea sp900553815	blast	92.3	iPHoP-RF;77.30
contig003497	vOTU001358	GB_GCA_939791845.1	d__Bacteria;p__Bacteroidota;c__Bacteroidia;o__Bacteroidales;f__Bacteroidaceae;g__Mediterranea;s__Mediterranea sp939791845	iPHoP-RF	91.4	None
contig003497	vOTU001358	MGYG000172350	d__Bacteria;p__Bacteroidota;c__Bacteroidia;o__Bacteroidales;f__Bacteroidaceae;g__Mediterranea;s__	iPHoP-RF	90.1	None
contig003500	vOTU001359	RS_GCF_010669225.1	d__Bacteria;p__Bacillota_C;c__Negativicutes;o__Selenomonadales;f__Selenomonadaceae;g__Megamonas;s__Megamonas funiformis	blast	93.9	None
contig003502	vOTU001361	RS_GCF_010669225.1	d__Bacteria;p__Bacillota_C;c__Negativicutes;o__Selenomonadales;f__Selenomonadaceae;g__Megamonas;s__Megamonas funiformis	blast	96.9	CRISPR;86.00 iPHoP-RF;80.60
contig003506	vOTU001363	GB_GCA_900552415.1	d__Bacteria;p__Bacteroidota;c__Bacteroidia;o__Bacteroidales;f__Tannerellaceae;g__Parabacteroides;s__Parabacteroides intestinipullorum	blast	96.1	iPHoP-RF;76.40
contig003511	vOTU001365	GB_GCA_902362595.1	d__Bacteria;p__Bacteroidota;c__Bacteroidia;o__Bacteroidales;f__Bacteroidaceae;g__Phocaeicola;s__Phocaeicola merdigallinarum	CRISPR	98.9	iPHoP-RF;90.10
contig003511	vOTU001365	RS_GCF_000154845.1	d__Bacteria;p__Bacteroidota;c__Bacteroidia;o__Bacteroidales;f__Bacteroidaceae;g__Phocaeicola;s__Phocaeicola coprocola	CRISPR	98.9	blast;94.00 iPHoP-RF;70.60
contig003511	vOTU001365	RS_GCF_000187895.1	d__Bacteria;p__Bacteroidota;c__Bacteroidia;o__Bacteroidales;f__Bacteroidaceae;g__Phocaeicola;s__Phocaeicola plebeius	CRISPR	98.9	blast;96.00 iPHoP-RF;89.50
contig003511	vOTU001365	RS_GCF_003437535.1	d__Bacteria;p__Bacteroidota;c__Bacteroidia;o__Bacteroidales;f__Bacteroidaceae;g__Phocaeicola;s__Phocaeicola plebeius_A	CRISPR	98.9	blast;98.20 iPHoP-RF;82.20
contig003511	vOTU001365	GB_GCA_000432735.1	d__Bacteria;p__Bacteroidota;c__Bacteroidia;o__Bacteroidales;f__Bacteroidaceae;g__Phocaeicola;s__Phocaeicola sp000432735	CRISPR	98.8	blast;75.40 iPHoP-RF;66.30
contig003511	vOTU001365	RS_GCF_000157915.1	d__Bacteria;p__Bacteroidota;c__Bacteroidia;o__Bacteroidales;f__Bacteroidaceae;g__Phocaeicola;s__Phocaeicola coprophilus	CRISPR	98.7	blast;66.10
contig003511	vOTU001365	GB_GCA_025147485.1	d__Bacteria;p__Bacteroidota;c__Bacteroidia;o__Bacteroidales;f__Bacteroidaceae;g__Bacteroides;s__Bacteroides uniformis	CRISPR	98.6	iPHoP-RF;70.60
contig003511	vOTU001365	RS_GCF_000374585.1	d__Bacteria;p__Bacteroidota;c__Bacteroidia;o__Bacteroidales;f__Bacteroidaceae;g__Phocaeicola;s__Phocaeicola barnesiae	CRISPR	98.6	iPHoP-RF;50.90
contig003511	vOTU001365	RS_GCF_002222615.2	d__Bacteria;p__Bacteroidota;c__Bacteroidia;o__Bacteroidales;f__Bacteroidaceae;g__Bacteroides;s__Bacteroides caccae	CRISPR	98.6	iPHoP-RF;90.10
contig003511	vOTU001365	RS_GCF_900128495.1	d__Bacteria;p__Bacteroidota;c__Bacteroidia;o__Bacteroidales;f__Bacteroidaceae;g__Phocaeicola;s__Phocaeicola ilei	CRISPR	98.5	iPHoP-RF;64.00
contig003511	vOTU001365	GB_GCA_900551445.1	d__Bacteria;p__Bacteroidota;c__Bacteroidia;o__Bacteroidales;f__Bacteroidaceae;g__Phocaeicola;s__Phocaeicola sp900551445	iPHoP-RF	96.7	None
contig003511	vOTU001365	GB_GCA_900552075.1	d__Bacteria;p__Bacteroidota;c__Bacteroidia;o__Bacteroidales;f__Bacteroidaceae;g__Phocaeicola;s__Phocaeicola sp900552075	iPHoP-RF	96.1	None
contig003511	vOTU001365	RS_GCF_900128455.1	d__Bacteria;p__Bacteroidota;c__Bacteroidia;o__Bacteroidales;f__Bacteroidaceae;g__Phocaeicola;s__Phocaeicola mediterraneensis	iPHoP-RF	95.7	blast;90.10
contig003511	vOTU001365	RS_GCF_016900355.1	d__Bacteria;p__Bacteroidota;c__Bacteroidia;o__Bacteroidales;f__Bacteroidaceae;g__Phocaeicola;s__Phocaeicola sp900551065	iPHoP-RF	95.4	None
contig003513	vOTU001366	RS_GCF_010669225.1	d__Bacteria;p__Bacillota_C;c__Negativicutes;o__Selenomonadales;f__Selenomonadaceae;g__Megamonas;s__Megamonas funiformis	blast	97.9	CRISPR;93.00 iPHoP-RF;70.90
contig003522	vOTU001370	GB_GCA_944320485.1	d__Archaea;p__Thermoplasmatota;c__Thermoplasmata;o__Methanomassiliicoccales;f__Methanomethylophilaceae;g__UBA71;s__UBA71 sp944320485	CRISPR	96	iPHoP-RF;71.70
contig003524	vOTU001371	GB_GCA_900540045.1	d__Bacteria;p__Bacillota_A;c__Clostridia;o__Christensenellales;f__CAG-74;g__Limiplasma;s__Limiplasma merdipullorum	CRISPR	99	iPHoP-RF;61.10
contig003524	vOTU001371	GB_GCA_900553905.1	d__Bacteria;p__Bacillota_A;c__Clostridia;o__Christensenellales;f__CAG-74;g__Limiplasma;s__Limiplasma pullistercoris	CRISPR	99	iPHoP-RF;75.20
contig003524	vOTU001371	GB_GCA_944349545.1	d__Bacteria;p__Bacillota_A;c__Clostridia;o__Christensenellales;f__CAG-74;g__Limiplasma;s__Limiplasma sp944349545	CRISPR	99	iPHoP-RF;70.40
contig003533	vOTU001374	RS_GCF_002160955.1	d__Bacteria;p__Bacillota_A;c__Clostridia;o__Oscillospirales;f__Ruminococcaceae;g__Gemmiger_A;s__Gemmiger_A avium	blast	93.7	iPHoP-RF;68.00
contig003547	vOTU001379	GB_GCA_900553905.1	d__Bacteria;p__Bacillota_A;c__Clostridia;o__Christensenellales;f__CAG-74;g__Limiplasma;s__Limiplasma pullistercoris	CRISPR	97	None
contig003570	vOTU001391	RS_GCF_000469305.1	d__Bacteria;p__Bacillota;c__Bacilli;o__Erysipelotrichales;f__Erysipelotrichaceae;g__Faecalitalea;s__Faecalitalea cylindroides	blast	98.3	iPHoP-RF;75.40 CRISPR;68.00
contig003584	vOTU001397	GB_GCA_900544445.1	d__Bacteria;p__Bacillota_A;c__Clostridia;o__Lachnospirales;f__Lachnospiraceae;g__Eisenbergiella;s__Eisenbergiella intestinigallinarum	CRISPR	96.4	None
contig003588	vOTU001398	RS_GCF_009755885.1	d__Bacteria;p__Spirochaetota;c__Brachyspirae;o__Brachyspirales;f__Brachyspiraceae;g__Brachyspira;s__Brachyspira sp009755885	iPHoP-RF	94.1	None
contig003588	vOTU001398	RS_GCF_002379365.1	d__Bacteria;p__Spirochaetota;c__Brachyspirae;o__Brachyspirales;f__Brachyspiraceae;g__Brachyspira;s__Brachyspira sp002379365	blast	93.5	iPHoP-RF;86.00
contig003588	vOTU001398	RS_GCF_008016535.1	d__Bacteria;p__Spirochaetota;c__Brachyspirae;o__Brachyspirales;f__Brachyspiraceae;g__Brachyspira;s__Brachyspira pilosicoli_A	iPHoP-RF	93.4	None
contig003588	vOTU001398	GB_GCA_944392715.1	d__Bacteria;p__Spirochaetota;c__Brachyspirae;o__Brachyspirales;f__Brachyspiraceae;g__Brachyspira;s__Brachyspira sp944392715	blast	92.6	iPHoP-RF;60.90
contig003588	vOTU001398	GB_GCA_934747485.1	d__Bacteria;p__Spirochaetota;c__Brachyspirae;o__Brachyspirales;f__Brachyspiraceae;g__Brachyspira;s__Brachyspira sp934747485	blast	91.9	iPHoP-RF;91.80
contig003588	vOTU001398	RS_GCF_000325665.1	d__Bacteria;p__Spirochaetota;c__Brachyspirae;o__Brachyspirales;f__Brachyspiraceae;g__Brachyspira;s__Brachyspira pilosicoli	blast	91.7	iPHoP-RF;89.50
contig003588	vOTU001398	GB_GCA_934725655.1	d__Bacteria;p__Spirochaetota;c__Brachyspirae;o__Brachyspirales;f__Brachyspiraceae;g__Brachyspira;s__Brachyspira sp934725655	blast	91	iPHoP-RF;87.00
contig003588	vOTU001398	RS_GCF_001049755.1	d__Bacteria;p__Spirochaetota;c__Brachyspirae;o__Brachyspirales;f__Brachyspiraceae;g__Brachyspira;s__Brachyspira suanatina	blast	90.5	iPHoP-RF;74.60
contig003588	vOTU001398	RS_GCF_001676785.2	d__Bacteria;p__Spirochaetota;c__Brachyspirae;o__Brachyspirales;f__Brachyspiraceae;g__Brachyspira;s__Brachyspira hyodysenteriae	blast	90.5	iPHoP-RF;73.70
contig003588	vOTU001398	GB_GCA_944393015.1	d__Bacteria;p__Spirochaetota;c__Brachyspirae;o__Brachyspirales;f__Brachyspiraceae;g__Brachyspira;s__Brachyspira sp944393015	blast	90.3	iPHoP-RF;64.80
[truncated: 228,428+ more rows]
