# Supplementary material for: Global Characterization of the Avian Gut Virome Reveals Extensive Viral Diversity and Functional Implications
Source: Research Square preprint supplement (doi:10.21203/rs.3.rs-6913311/v1), 2025-10-16
Supplement: Supplementary file 5 [file 410e38f263ecb1eb6095bd5e.xlsx]

## Sheet: dramv_ARG_resfinder
Supplementary Table S8: The detail information of ARGs of avian gut virome identified in ResFinder databases.
#FILE	SEQUENCE	START	END	STRAND	GENE	COVERAGE	COVERAGE_MAP	GAPS	%COVERAGE	%IDENTITY	DATABASE	ACCESSION	PRODUCT	RESISTANCE
input.faa	contig002358-cat_1_42	1	651	+	cat_3	1-651/651	===============	0/0	100	95.85	resfinder	S48276	cat	Chloramphenicol
input.faa	contig008023-cat_1_1	1	729	+	erm(B)_12	10-738/738	===============	0/0	98.78	100	resfinder	U18931	erm(B)	Erythromycin;Lincomycin;Clindamycin;Quinupristin;Pristinamycin_IA;Virginiamycin_S
input.faa	contig024172-cat_1_3	1	906	+	aph(2'')-Id_1	1-906/906	===============	0/0	100	100	resfinder	AF016483	aph(2'')-Id	Amikacin;Gentamicin;Tobramycin
input.faa	contig035293-cat_1_25	1	966	+	cfxA4_1	1-966/966	===============	0/0	100	100	resfinder	AY769933	cfxA4
input.faa	contig057519-cat_2_1	10	1032	+	cfr(C)_2	1-1022/1251	========/====..	45658	81.69	99.9	resfinder	CANB01000378	cfr(C)	Chloramphenicol;Florfenicol;Clindamycin;Lincomycin;Linezolid;Dalfopristin;Pristinamycin_IIA;Virginiamycin_M;Tiamulin
input.faa	contig058908-cat_1_3	1	651	+	cat(pC194)_1	1-651/651	===============	0/0	100	96.62	resfinder	NC_002013	cat(pC194)	Chloramphenicol
input.faa	contig066981-cat_1_9	1	735	+	erm(G)_1	1-735/735	===============	0/0	100	100	resfinder	M15332	erm(G)	Erythromycin;Lincomycin;Clindamycin;Quinupristin;Pristinamycin_IA;Virginiamycin_S
input.faa	contig070200-cat_1_1	1	441	+	lnu(C)_1	1-441/495	==============.	0/0	89.09	99.09	resfinder	AY928180	lnu(C)	Lincomycin
input.faa	contig077649-cat_1_16	1	735	+	erm(G)_1	1-735/735	===============	0/0	100	99.86	resfinder	M15332	erm(G)	Erythromycin;Lincomycin;Clindamycin;Quinupristin;Pristinamycin_IA;Virginiamycin_S
input.faa	contig084838-cat_1_9	1	867	+	ant(6)-Ia_3	1-867/867	===============	0/0	100	100	resfinder	KF864551	ant(6)-Ia	Streptomycin
input.faa	contig090873-cat_1_1	1	495	+	lnu(C)_1	1-495/495	===============	0/0	100	98.99	resfinder	AY928180	lnu(C)	Lincomycin
input.faa	contig096448-cat_2_6	1	735	+	erm(G)_1	1-735/735	===============	0/0	100	100	resfinder	M15332	erm(G)	Erythromycin;Lincomycin;Clindamycin;Quinupristin;Pristinamycin_IA;Virginiamycin_S
input.faa	contig098984-cat_1_3	1	867	+	ant(6)-Ia_3	1-867/867	===============	0/0	100	100	resfinder	KF864551	ant(6)-Ia	Streptomycin
input.faa	contig099669-cat_1_2	23	708	+	erm(B)_12	53-738/738	.==============	0/0	92.95	100	resfinder	U18931	erm(B)	Erythromycin;Lincomycin;Clindamycin;Quinupristin;Pristinamycin_IA;Virginiamycin_S
input.faa	contig113615-cat_1_1	1	795	+	aph(3')-III_1	1-795/795	===============	0/0	100	100	resfinder	M26832	aph(3')-III	Amikacin
input.faa	contig115649-cat_2_9	1	735	+	erm(G)_1	1-735/735	===============	0/0	100	100	resfinder	M15332	erm(G)	Erythromycin;Lincomycin;Clindamycin;Quinupristin;Pristinamycin_IA;Virginiamycin_S
input.faa	contig117182-cat_2_7	1	735	+	erm(G)_1	1-735/735	===============	0/0	100	100	resfinder	M15332	erm(G)	Erythromycin;Lincomycin;Clindamycin;Quinupristin;Pristinamycin_IA;Virginiamycin_S
input.faa	contig123284-cat_1_2	1	855	+	erm(X)_1	1-855/855	========/======	45690	99.88	99.18	resfinder	M36726	erm(X)	Erythromycin;Lincomycin;Clindamycin;Quinupristin;Pristinamycin_IA;Virginiamycin_S
input.faa	contig135003-cat_1_60	1	1218	+	mef(A)_1	1-1218/1218	===============	0/0	100	94.5	resfinder	AJ971089	mef(A)	Erythromycin;Azithromycin
input.faa	contig136695-cat_1_2	1	966	+	cfxA4_1	1-966/966	===============	0/0	100	100	resfinder	AY769933	cfxA4
input.faa	contig138526-cat_1_11	1	735	+	erm(G)_1	1-735/735	===============	0/0	100	100	resfinder	M15332	erm(G)	Erythromycin;Lincomycin;Clindamycin;Quinupristin;Pristinamycin_IA;Virginiamycin_S
input.faa	contig140483-cat_1_7	1	771	+	aadD_1	1-771/771	===============	0/0	100	95.59	resfinder	AF181950	aadD	Amikacin;Tobramycin
input.faa	contig141689-cat_1_65	1	855	+	erm(X)_1	1-855/855	========/======	45690	99.88	99.18	resfinder	M36726	erm(X)	Erythromycin;Lincomycin;Clindamycin;Quinupristin;Pristinamycin_IA;Virginiamycin_S
input.faa	contig142489-cat_1_1	1	855	+	erm(X)_1	1-855/855	========/======	45690	99.88	99.18	resfinder	M36726	erm(X)	Erythromycin;Lincomycin;Clindamycin;Quinupristin;Pristinamycin_IA;Virginiamycin_S
input.faa	contig142621-cat_1_2	1	855	+	erm(X)_1	1-855/855	========/======	45690	99.88	99.18	resfinder	M36726	erm(X)	Erythromycin;Lincomycin;Clindamycin;Quinupristin;Pristinamycin_IA;Virginiamycin_S
input.faa	contig157494-cat_1_2	1	501	+	lnu(P)_1	1-501/501	===============	0/0	100	100	resfinder	FJ589781	lnu(P)	Lincomycin
input.faa	contig161695-cat_1_7	1	771	+	aadD_1	1-771/771	===============	0/0	100	95.59	resfinder	AF181950	aadD	Amikacin;Tobramycin
input.faa	contig164629-cat_2_4	1	891	+	aph(2'')-Ic_1	31-921/921	===============	0/0	96.74	99.89	resfinder	U51479	aph(2'')-Ic	Amikacin;Gentamicin;Tobramycin
input.faa	contig169638-cat_1_26	1	966	+	cfxA3_1	1-966/966	===============	0/0	100	85.61	resfinder	AF472622	cfxA3
input.faa	contig169653-cat_1_30	1	495	+	lnu(C)_1	1-495/495	===============	0/0	100	98.99	resfinder	AY928180	lnu(C)	Lincomycin
input.faa	contig170271-cat_1_29	1	966	+	cfxA3_1	1-966/966	===============	0/0	100	85.61	resfinder	AF472622	cfxA3
input.faa	contig173964-cat_1_2	1	735	+	erm(Y)_1	1-735/735	===============	0/0	100	96.33	resfinder	AB014481	erm(Y)	Erythromycin;Lincomycin;Clindamycin;Quinupristin;Pristinamycin_IA;Virginiamycin_S
input.faa	contig175431-cat_1_6	1	735	+	erm(Y)_1	1-735/735	===============	0/0	100	96.33	resfinder	AB014481	erm(Y)	Erythromycin;Lincomycin;Clindamycin;Quinupristin;Pristinamycin_IA;Virginiamycin_S
input.faa	contig180079-cat_1_5	1	735	+	erm(Y)_1	1-735/735	===============	0/0	100	96.05	resfinder	AB014481	erm(Y)	Erythromycin;Lincomycin;Clindamycin;Quinupristin;Pristinamycin_IA;Virginiamycin_S
input.faa	contig180339-cat_1_7	1	735	+	erm(Y)_1	1-735/735	===============	0/0	100	96.33	resfinder	AB014481	erm(Y)	Erythromycin;Lincomycin;Clindamycin;Quinupristin;Pristinamycin_IA;Virginiamycin_S
input.faa	contig195238-cat_2_1	1	864	+	ant(6)-Ia_2	1-864/864	===============	0/0	100	100	resfinder	KF421157	ant(6)-Ia	Streptomycin
input.faa	contig201169-cat_1_7	1	1920	+	tet(W)_4	1-1920/1920	===============	0/0	100	99.01	resfinder	FN396364	tet(W)	Doxycycline;Tetracycline;Minocycline
input.faa	contig203701-cat_2_14	1	735	+	erm(B)_23	1-735/738	===============	0/0	99.59	99.86	resfinder	X72021	erm(B)	Erythromycin;Lincomycin;Clindamycin;Quinupristin;Pristinamycin_IA;Virginiamycin_S
input.faa	contig205438-cat_2_35	1	498	+	dfrG_1	1-498/498	===============	0/0	100	99.6	resfinder	AB205645	dfrG	Trimethoprim
input.faa	contig206062-cat_2_36	1	483	+	dfrG_1	1-483/498	===============	0/0	96.99	100	resfinder	AB205645	dfrG	Trimethoprim
input.faa	contig210475-cat_1_10	1	1218	+	mef(A)_2	1-1218/1218	===============	0/0	100	96.22	resfinder	U83667	mef(A)	Erythromycin;Azithromycin
input.faa	contig210475-cat_1_11	1	1451	+	msr(D)_2	1-1451/1464	===============	0/0	99.11	96.55	resfinder	AF274302	msr(D)	Erythromycin;Azithromycin;Telithromycin;Quinupristin;Pristinamycin_IA;Virginiamycin_S
input.faa	contig210870-cat_1_1	1	1281	+	msr(D)_2	1-1281/1464	==============.	0/0	87.5	97.66	resfinder	AF274302	msr(D)	Erythromycin;Azithromycin;Telithromycin;Quinupristin;Pristinamycin_IA;Virginiamycin_S
input.faa	contig210870-cat_1_2	1	1218	+	mef(A)_2	1-1218/1218	===============	0/0	100	96.31	resfinder	U83667	mef(A)	Erythromycin;Azithromycin
input.faa	contig212127-cat_1_8	1	1218	+	mef(A)_3	1-1218/1218	===============	0/0	100	96.22	resfinder	AF227520	mef(A)	Erythromycin;Azithromycin
input.faa	contig212955-cat_1_7	1	1218	+	mef(A)_2	1-1218/1218	===============	0/0	100	96.31	resfinder	U83667	mef(A)	Erythromycin;Azithromycin
input.faa	contig214692-cat_1_2	1	1218	+	mef(A)_2	1-1218/1218	===============	0/0	100	96.31	resfinder	U83667	mef(A)	Erythromycin;Azithromycin
input.faa	contig216042-cat_1_1	1	735	+	erm(G)_1	1-735/735	===============	0/0	100	100	resfinder	M15332	erm(G)	Erythromycin;Lincomycin;Clindamycin;Quinupristin;Pristinamycin_IA;Virginiamycin_S
input.faa	contig216042-cat_1_4	1	1464	+	msr(D)_2	1-1464/1464	===============	0/0	100	97.61	resfinder	AF274302	msr(D)	Erythromycin;Azithromycin;Telithromycin;Quinupristin;Pristinamycin_IA;Virginiamycin_S
input.faa	contig216042-cat_1_5	1	1218	+	mef(A)_2	1-1218/1218	===============	0/0	100	96.31	resfinder	U83667	mef(A)	Erythromycin;Azithromycin
input.faa	contig220698-cat_1_13	1	1218	+	mef(A)_2	1-1218/1218	===============	0/0	100	96.31	resfinder	U83667	mef(A)	Erythromycin;Azithromycin
input.faa	contig220698-cat_1_14	1	1464	+	msr(D)_2	1-1464/1464	===============	0/0	100	97.61	resfinder	AF274302	msr(D)	Erythromycin;Azithromycin;Telithromycin;Quinupristin;Pristinamycin_IA;Virginiamycin_S
input.faa	contig230278-cat_2_5	97	896	+	erm(F)_3	1-800/801	===============	0/0	99.88	95.12	resfinder	M17808	erm(F)	Erythromycin;Lincomycin;Clindamycin;Quinupristin;Pristinamycin_IA;Virginiamycin_S
input.faa	contig231134-cat_2_8	97	896	+	erm(F)_3	1-800/801	===============	0/0	99.88	95.12	resfinder	M17808	erm(F)	Erythromycin;Lincomycin;Clindamycin;Quinupristin;Pristinamycin_IA;Virginiamycin_S
input.faa	contig231458-cat_1_5	1	1251	+	cfr(C)_2	1-1251/1251	===============	0/0	100	99.84	resfinder	CANB01000378	cfr(C)	Chloramphenicol;Florfenicol;Clindamycin;Lincomycin;Linezolid;Dalfopristin;Pristinamycin_IIA;Virginiamycin_M;Tiamulin
input.faa	contig233597-cat_1_1	1	1920	+	tet(Q)_1	7-1926/1926	===============	0/0	99.69	98.91	resfinder	L33696	tet(Q)	Doxycycline;Tetracycline;Minocycline
input.faa	contig233597-cat_1_9	97	896	+	erm(F)_3	1-800/801	===============	0/0	99.88	95.12	resfinder	M17808	erm(F)	Erythromycin;Lincomycin;Clindamycin;Quinupristin;Pristinamycin_IA;Virginiamycin_S
input.faa	contig234039-cat_2_1	97	896	+	erm(F)_3	1-800/801	===============	0/0	99.88	95.12	resfinder	M17808	erm(F)	Erythromycin;Lincomycin;Clindamycin;Quinupristin;Pristinamycin_IA;Virginiamycin_S
input.faa	contig235084-cat_2_8	97	798	+	erm(F)_3	1-702/801	==============.	0/0	87.64	95.3	resfinder	M17808	erm(F)	Erythromycin;Lincomycin;Clindamycin;Quinupristin;Pristinamycin_IA;Virginiamycin_S
input.faa	contig239987-cat_1_4	1	840	+	sul1_2	1-840/840	===============	0/0	100	100	resfinder	U12338	sul1	Sulfamethoxazole
input.faa	contig239987-cat_1_6	1	780	+	aadA2_1	40-819/819	===============	0/0	95.24	100	resfinder	NC_010870	aadA2	Streptomycin
input.faa	contig241807-cat_1_1	1	855	+	erm(X)_4	1-855/855	===============	0/0	100	96.96	resfinder	NC_005206	erm(X)	Erythromycin;Lincomycin;Clindamycin;Quinupristin;Pristinamycin_IA;Virginiamycin_S
input.faa	contig244222-cat_1_1	1	855	+	erm(X)_4	1-855/855	===============	0/0	100	96.96	resfinder	NC_005206	erm(X)	Erythromycin;Lincomycin;Clindamycin;Quinupristin;Pristinamycin_IA;Virginiamycin_S
input.faa	contig244825-cat_1_1	1	855	+	erm(X)_4	1-855/855	===============	0/0	100	96.96	resfinder	NC_005206	erm(X)	Erythromycin;Lincomycin;Clindamycin;Quinupristin;Pristinamycin_IA;Virginiamycin_S
input.faa	contig246052-cat_1_17	1	855	+	erm(X)_4	1-855/855	===============	0/0	100	96.96	resfinder	NC_005206	erm(X)	Erythromycin;Lincomycin;Clindamycin;Quinupristin;Pristinamycin_IA;Virginiamycin_S
input.faa	contig246204-cat_1_1	1	855	+	erm(X)_4	1-855/855	===============	0/0	100	96.96	resfinder	NC_005206	erm(X)	Erythromycin;Lincomycin;Clindamycin;Quinupristin;Pristinamycin_IA;Virginiamycin_S
input.faa	contig246318-cat_1_1	1	855	+	erm(X)_4	1-855/855	===============	0/0	100	96.96	resfinder	NC_005206	erm(X)	Erythromycin;Lincomycin;Clindamycin;Quinupristin;Pristinamycin_IA;Virginiamycin_S
input.faa	contig246478-cat_1_1	1	855	+	erm(X)_4	1-855/855	===============	0/0	100	96.96	resfinder	NC_005206	erm(X)	Erythromycin;Lincomycin;Clindamycin;Quinupristin;Pristinamycin_IA;Virginiamycin_S
input.faa	contig246486-cat_1_1	1	855	+	erm(X)_4	1-855/855	===============	0/0	100	96.96	resfinder	NC_005206	erm(X)	Erythromycin;Lincomycin;Clindamycin;Quinupristin;Pristinamycin_IA;Virginiamycin_S
input.faa	contig246586-cat_1_1	1	855	+	erm(X)_4	1-855/855	===============	0/0	100	96.96	resfinder	NC_005206	erm(X)	Erythromycin;Lincomycin;Clindamycin;Quinupristin;Pristinamycin_IA;Virginiamycin_S
input.faa	contig246605-cat_1_1	1	855	+	erm(X)_4	1-855/855	===============	0/0	100	96.96	resfinder	NC_005206	erm(X)	Erythromycin;Lincomycin;Clindamycin;Quinupristin;Pristinamycin_IA;Virginiamycin_S
input.faa	contig246643-cat_1_1	1	855	+	erm(X)_4	1-855/855	===============	0/0	100	96.96	resfinder	NC_005206	erm(X)	Erythromycin;Lincomycin;Clindamycin;Quinupristin;Pristinamycin_IA;Virginiamycin_S
input.faa	contig246824-cat_1_1	1	855	+	erm(X)_4	1-855/855	===============	0/0	100	96.96	resfinder	NC_005206	erm(X)	Erythromycin;Lincomycin;Clindamycin;Quinupristin;Pristinamycin_IA;Virginiamycin_S
input.faa	contig246911-cat_1_1	1	855	+	erm(X)_4	1-855/855	===============	0/0	100	96.96	resfinder	NC_005206	erm(X)	Erythromycin;Lincomycin;Clindamycin;Quinupristin;Pristinamycin_IA;Virginiamycin_S
input.faa	contig249664-cat_1_6	1	780	+	aadA2_1	40-819/819	===============	0/0	95.24	100	resfinder	NC_010870	aadA2	Streptomycin
input.faa	contig249664-cat_1_8	1	840	+	sul1_2	1-840/840	===============	0/0	100	100	resfinder	U12338	sul1	Sulfamethoxazole
input.faa	contig250992-cat_1_10	1	495	+	lnu(D)_1	1-495/495	===============	0/0	100	83.84	resfinder	EF452177	lnu(D)	Lincomycin
input.faa	contig251069-cat_1_2	1	900	+	aph(2'')-Ib_2	1-900/900	===============	0/0	100	84.89	resfinder	AF207840	aph(2'')-Ib	Amikacin;Gentamicin;Tobramycin
input.faa	contig251069-cat_1_3	1	537	+	aac(6')-Im_1	1-537/537	===============	0/0	100	89.2	resfinder	AF337947	aac(6')-Im	Amikacin;Tobramycin
input.faa	contig253142-cat_1_1	1	855	+	erm(X)_4	1-855/855	===============	0/0	100	96.96	resfinder	NC_005206	erm(X)	Erythromycin;Lincomycin;Clindamycin;Quinupristin;Pristinamycin_IA;Virginiamycin_S
input.faa	contig254216-cat_1_1	1	855	+	erm(X)_4	1-855/855	===============	0/0	100	96.96	resfinder	NC_005206	erm(X)	Erythromycin;Lincomycin;Clindamycin;Quinupristin;Pristinamycin_IA;Virginiamycin_S
input.faa	contig254280-cat_1_1	1	855	+	erm(X)_4	1-855/855	===============	0/0	100	96.96	resfinder	NC_005206	erm(X)	Erythromycin;Lincomycin;Clindamycin;Quinupristin;Pristinamycin_IA;Virginiamycin_S
input.faa	contig254687-cat_1_1	1	855	+	erm(X)_4	1-855/855	===============	0/0	100	96.96	resfinder	NC_005206	erm(X)	Erythromycin;Lincomycin;Clindamycin;Quinupristin;Pristinamycin_IA;Virginiamycin_S
input.faa	contig254699-cat_1_1	1	855	+	erm(X)_4	1-855/855	===============	0/0	100	96.96	resfinder	NC_005206	erm(X)	Erythromycin;Lincomycin;Clindamycin;Quinupristin;Pristinamycin_IA;Virginiamycin_S
input.faa	contig254862-cat_1_1	1	855	+	erm(X)_4	1-855/855	===============	0/0	100	96.96	resfinder	NC_005206	erm(X)	Erythromycin;Lincomycin;Clindamycin;Quinupristin;Pristinamycin_IA;Virginiamycin_S
input.faa	contig254877-cat_1_1	1	855	+	erm(X)_4	1-855/855	===============	0/0	100	96.96	resfinder	NC_005206	erm(X)	Erythromycin;Lincomycin;Clindamycin;Quinupristin;Pristinamycin_IA;Virginiamycin_S
input.faa	contig254970-cat_1_1	1	855	+	erm(X)_4	1-855/855	===============	0/0	100	96.96	resfinder	NC_005206	erm(X)	Erythromycin;Lincomycin;Clindamycin;Quinupristin;Pristinamycin_IA;Virginiamycin_S
input.faa	contig255535-cat_1_6	1	1920	+	tet(W)_4	1-1920/1920	===============	0/0	100	99.06	resfinder	FN396364	tet(W)	Doxycycline;Tetracycline;Minocycline
input.faa	contig256862-cat_1_2	1	900	+	aph(2'')-Ib_2	1-900/900	===============	0/0	100	84.89	resfinder	AF207840	aph(2'')-Ib	Amikacin;Gentamicin;Tobramycin
input.faa	contig256862-cat_1_3	1	537	+	aac(6')-Im_1	1-537/537	===============	0/0	100	89.2	resfinder	AF337947	aac(6')-Im	Amikacin;Tobramycin
input.faa	contig258480-cat_1_6	1	705	+	aph(3')-VIIa_1	49-753/753	===============	0/0	93.63	84.68	resfinder	M29953	aph(3')-VIIa	Amikacin
input.faa	contig263647-cat_1_17	1	855	+	erm(X)_4	1-855/855	===============	0/0	100	96.96	resfinder	NC_005206	erm(X)	Erythromycin;Lincomycin;Clindamycin;Quinupristin;Pristinamycin_IA;Virginiamycin_S
input.faa	contig263751-cat_1_1	1	855	+	erm(X)_4	1-855/855	===============	0/0	100	96.96	resfinder	NC_005206	erm(X)	Erythromycin;Lincomycin;Clindamycin;Quinupristin;Pristinamycin_IA;Virginiamycin_S
input.faa	contig272900-cat_1_1	1	855	+	blaACI-1_1	1-855/855	===============	0/0	100	99.77	resfinder	AJ007350	blaACI-1
input.faa	contig275483-cat_1_1	1	1218	+	mef(A)_1	1-1218/1218	===============	0/0	100	95.73	resfinder	AJ971089	mef(A)	Erythromycin;Azithromycin
input.faa	contig275483-cat_1_2	1	1246	+	msr(D)_2	1-1246/1464	=============..	0/0	85.11	97.03	resfinder	AF274302	msr(D)	Erythromycin;Azithromycin;Telithromycin;Quinupristin;Pristinamycin_IA;Virginiamycin_S
input.faa	contig278235-cat_1_75	1	855	+	blaACI-1_1	1-855/855	===============	0/0	100	99.77	resfinder	AJ007350	blaACI-1
input.faa	contig280250-cat_1_20	1	867	+	ant(6)-Ia_3	1-867/867	===============	0/0	100	100	resfinder	KF864551	ant(6)-Ia	Streptomycin
input.faa	contig294536-cat_1_10	1	495	+	lnu(D)_1	1-495/495	===============	0/0	100	83.84	resfinder	EF452177	lnu(D)	Lincomycin
input.faa	contig301070-cat_1_6	1	735	+	erm(G)_1	1-735/735	===============	0/0	100	100	resfinder	M15332	erm(G)	Erythromycin;Lincomycin;Clindamycin;Quinupristin;Pristinamycin_IA;Virginiamycin_S
