# Supplementary material for: Global Characterization of the Avian Gut Virome Reveals Extensive Viral Diversity and Functional Implications
Source: Research Square preprint supplement (doi:10.21203/rs.3.rs-6913311/v1), 2025-10-16
Supplement: Supplementary file 6 [file 94ff746e53cc97a0a0f7cf73.xlsx]

## Sheet: Supplementary table 3
Supplementary Table S3: Statistical information and classification level annotation of phages with an above medium quality.
study_id	contig_id	contig_repid	realm	kingdom	phylum	class	order	family	genus	classify_type	virsorter2_score	virsorter2_group	virsorter2_category	vibrant_quality_score	vc_classified	vc_id	vc_with_ref	vc_novel_genus	lifestyle
ma2024imeta	contig000016	contig002642	Duplodnaviria	Heunggongvirae	Uroviricota	Caudoviricetes	[Novel_Order]_{class}_Caudoviricetes	[Novel_Family]_{class}_Caudoviricetes	[Novel_Genus]_{class}_Caudoviricetes	Viruses	0.993	dsDNAphage	1	4	classified	VC17417	FALSE	TRUE	virulent
ma2024imeta	contig000076	contig000076	Duplodnaviria	Heunggongvirae	Uroviricota	Caudoviricetes	[Novel_Order]_{class}_Caudoviricetes	[Novel_Family]_{class}_Caudoviricetes	[Novel_Genus]_{class}_Caudoviricetes	Viruses	0.98	dsDNAphage	1	3	classified	VC68716	FALSE	TRUE	virulent
ma2024imeta	contig000120	contig000120	Duplodnaviria	Heunggongvirae	Uroviricota	Caudoviricetes	[Novel_Order]_{class}_Caudoviricetes	[Novel_Family]_{class}_Caudoviricetes	[Novel_Genus]_{class}_Caudoviricetes	Viruses	1	dsDNAphage	1	3	classified	VC69493	FALSE	TRUE	virulent
ma2024imeta	contig000144	contig000144	Duplodnaviria	Heunggongvirae	Uroviricota	Caudoviricetes	[Novel_Order]_{class}_Caudoviricetes	[Novel_Family]_{class}_Caudoviricetes	[Novel_Genus]_{class}_Caudoviricetes	Viruses	1	dsDNAphage	1	4	classified	VC38126	FALSE	TRUE	temperate
ma2024imeta	contig000193	contig000193	Duplodnaviria	Heunggongvirae	Uroviricota	Caudoviricetes	[Novel_Order]_{class}_Caudoviricetes	[Novel_Family]_{class}_Caudoviricetes	[Novel_Genus]_{class}_Caudoviricetes	Viruses	1	dsDNAphage	1	1	classified	VC15211	FALSE	TRUE	virulent
ma2024imeta	contig000196	contig235740	Duplodnaviria	Heunggongvirae	Uroviricota	Caudoviricetes	[Novel_Order]_{class}_Caudoviricetes	[Novel_Family]_{class}_Caudoviricetes	[Novel_Genus]_{class}_Caudoviricetes	Viruses	1	dsDNAphage	1	1	classified	VC40750	FALSE	TRUE	temperate
ma2024imeta	contig000197	contig133343	Duplodnaviria	Heunggongvirae	Uroviricota	Caudoviricetes	[Novel_Order]_{class}_Caudoviricetes	[Novel_Family]_{class}_Caudoviricetes	[Novel_Genus]_{class}_Caudoviricetes	Viruses	1	dsDNAphage	1	1	classified	VC61561	FALSE	TRUE	temperate
ma2024imeta	contig000209	contig000209	Duplodnaviria	Heunggongvirae	Uroviricota	Caudoviricetes	[Novel_Order]_{class}_Caudoviricetes	[Novel_Family]_{class}_Caudoviricetes	[Novel_Genus]_{class}_Caudoviricetes	Viruses	1	dsDNAphage	1	1	classified	VC60418	FALSE	TRUE	temperate
ma2024imeta	contig000222	contig000222	Duplodnaviria	Heunggongvirae	Uroviricota	Caudoviricetes	[Novel_Order]_{class}_Caudoviricetes	[Novel_Family]_{class}_Caudoviricetes	[Novel_Genus]_{class}_Caudoviricetes	Viruses	1	dsDNAphage	1	1	classified	VC15064	FALSE	TRUE	virulent
ma2024imeta	contig000223	contig000656	Duplodnaviria	Heunggongvirae	Uroviricota	Caudoviricetes	[Novel_Order]_{class}_Caudoviricetes	[Novel_Family]_{class}_Caudoviricetes	[Novel_Genus]_{class}_Caudoviricetes	Viruses	1	dsDNAphage	1	1	classified	VC20886	FALSE	TRUE	virulent
ma2024imeta	contig000226	contig001628	Duplodnaviria	Heunggongvirae	Uroviricota	Caudoviricetes	[Novel_Order]_{class}_Caudoviricetes	[Novel_Family]_{class}_Caudoviricetes	[Novel_Genus]_{class}_Caudoviricetes	Viruses	1	dsDNAphage	1	1	classified	VC61598	FALSE	TRUE	virulent
ma2024imeta	contig000227	contig136426	Duplodnaviria	Heunggongvirae	Uroviricota	Caudoviricetes	[Novel_Order]_{class}_Caudoviricetes	[Novel_Family]_{class}_Caudoviricetes	[Novel_Genus]_{class}_Caudoviricetes	Viruses	1	dsDNAphage	1	1	classified	VC47688	FALSE	TRUE	temperate
ma2024imeta	contig000228	contig039184	Duplodnaviria	Heunggongvirae	Uroviricota	Caudoviricetes	[Novel_Order]_{class}_Caudoviricetes	[Novel_Family]_{class}_Caudoviricetes	[Novel_Genus]_{class}_Caudoviricetes	Viruses	0.987	dsDNAphage	1	1	classified	VC68720	FALSE	TRUE	virulent
ma2024imeta	contig000231	contig000231	Duplodnaviria	Heunggongvirae	Uroviricota	Caudoviricetes	[Novel_Order]_{class}_Caudoviricetes	[Novel_Family]_{class}_Caudoviricetes	[Novel_Genus]_{class}_Caudoviricetes	Viruses	1	dsDNAphage	1	1	classified	VC01029	FALSE	TRUE	temperate
ma2024imeta	contig000275	contig000275	Duplodnaviria	Heunggongvirae	Uroviricota	Caudoviricetes	[Novel_Order]_{class}_Caudoviricetes	[Novel_Family]_{class}_Caudoviricetes	[Novel_Genus]_{class}_Caudoviricetes	Viruses	1	dsDNAphage	1	1	classified	VC30156	FALSE	TRUE	temperate
ma2024imeta	contig000320	contig000320	Duplodnaviria	Heunggongvirae	Uroviricota	Caudoviricetes	[Novel_Order]_{class}_Caudoviricetes	[Novel_Family]_{class}_Caudoviricetes	[Novel_Genus]_{class}_Caudoviricetes	Viruses	0.967	dsDNAphage	1	3	classified	VC41639	FALSE	TRUE	virulent
ma2024imeta	contig000341	contig000341	Duplodnaviria	Heunggongvirae	Uroviricota	Caudoviricetes	[Novel_Order]_{class}_Caudoviricetes	[Novel_Family]_{class}_Caudoviricetes	[Novel_Genus]_{class}_Caudoviricetes	Viruses	1	dsDNAphage	1	4	classified	VC68890	FALSE	TRUE	temperate
ma2024imeta	contig000434	contig001060	Duplodnaviria	Heunggongvirae	Uroviricota	Caudoviricetes	[Novel_Order]_{class}_Caudoviricetes	[Novel_Family]_{class}_Caudoviricetes	[Novel_Genus]_{class}_Caudoviricetes	Viruses	0.993	dsDNAphage	1	1	classified	VC27239	FALSE	TRUE	virulent
ma2024imeta	contig000451	contig142921	Duplodnaviria	Heunggongvirae	Uroviricota	Caudoviricetes	[Novel_Order]_{class}_Caudoviricetes	[Novel_Family]_{class}_Caudoviricetes	[Novel_Genus]_{class}_Caudoviricetes	Viruses	1	dsDNAphage	1	4	classified	VC68889	FALSE	TRUE	virulent
ma2024imeta	contig000513	contig000513	Duplodnaviria	Heunggongvirae	Uroviricota	Caudoviricetes	Crassvirales	[Novel_Family]_{order}_Crassvirales	[Novel_Genus]_{order}_Crassvirales	Viruses	1	dsDNAphage	1	1	classified	VC00177	FALSE	TRUE	virulent
ma2024imeta	contig000562	contig184213	Duplodnaviria	Heunggongvirae	Uroviricota	Caudoviricetes	[Novel_Order]_{class}_Caudoviricetes	[Novel_Family]_{class}_Caudoviricetes	[Novel_Genus]_{class}_Caudoviricetes	Viruses	1	dsDNAphage	1	1	classified	VC33512	FALSE	TRUE	virulent
ma2024imeta	contig000661	contig000661	Duplodnaviria	Heunggongvirae	Uroviricota	Caudoviricetes	[Novel_Order]_{class}_Caudoviricetes	[Novel_Family]_{class}_Caudoviricetes	[Novel_Genus]_{class}_Caudoviricetes	Viruses	1	dsDNAphage	1	1	classified	VC55259	FALSE	TRUE	temperate
ma2024imeta	contig000662	contig000662	Duplodnaviria	Heunggongvirae	Uroviricota	Caudoviricetes	[Novel_Order]_{class}_Caudoviricetes	[Novel_Family]_{class}_Caudoviricetes	[Novel_Genus]_{class}_Caudoviricetes	Viruses	0.987	dsDNAphage	1	1	classified	VC30677	FALSE	TRUE	temperate
ma2024imeta	contig000664	contig000664	Duplodnaviria	Heunggongvirae	Uroviricota	Caudoviricetes	[Novel_Order]_{class}_Caudoviricetes	[Novel_Family]_{class}_Caudoviricetes	[Novel_Genus]_{class}_Caudoviricetes	Viruses	1	dsDNAphage	1	1	classified	VC20245	FALSE	TRUE	temperate
ma2024imeta	contig000666	contig107836	Duplodnaviria	Heunggongvirae	Uroviricota	Caudoviricetes	[Novel_Order]_{class}_Caudoviricetes	[Novel_Family]_{class}_Caudoviricetes	[Novel_Genus]_{class}_Caudoviricetes	Viruses	1	dsDNAphage	1	1	classified	VC40925	FALSE	TRUE	temperate
ma2024imeta	contig000667	contig000667	Duplodnaviria	Heunggongvirae	Uroviricota	Caudoviricetes	[Novel_Order]_{class}_Caudoviricetes	[Novel_Family]_{class}_Caudoviricetes	[Novel_Genus]_{class}_Caudoviricetes	Viruses	0.987	dsDNAphage	1	1	classified	VC22654	FALSE	TRUE	temperate
ma2024imeta	contig000672	contig000672	Duplodnaviria	Heunggongvirae	Uroviricota	Caudoviricetes	[Novel_Order]_{class}_Caudoviricetes	[Novel_Family]_{class}_Caudoviricetes	[Novel_Genus]_{class}_Caudoviricetes	Viruses	1	dsDNAphage	1	1	classified	VC18209	FALSE	TRUE	temperate
ma2024imeta	contig000725	contig000725	Duplodnaviria	Heunggongvirae	Uroviricota	Caudoviricetes	[Novel_Order]_{class}_Caudoviricetes	[Novel_Family]_{class}_Caudoviricetes	[Novel_Genus]_{class}_Caudoviricetes	Viruses	1	dsDNAphage	1	1	classified	VC20274	FALSE	TRUE	temperate
ma2024imeta	contig000806	contig136714	Duplodnaviria	Heunggongvirae	Uroviricota	Caudoviricetes	[Novel_Order]_{class}_Caudoviricetes	[Novel_Family]_{class}_Caudoviricetes	[Novel_Genus]_{class}_Caudoviricetes	Viruses	0.987	dsDNAphage	1	3	classified	VC39114	FALSE	TRUE	temperate
ma2024imeta	contig000835	contig000835	Duplodnaviria	Heunggongvirae	Uroviricota	Caudoviricetes	[Novel_Order]_{class}_Caudoviricetes	[Novel_Family]_{class}_Caudoviricetes	[Novel_Genus]_{class}_Caudoviricetes	Viruses	0.993	dsDNAphage	1	1	classified	VC30247	FALSE	TRUE	temperate
ma2024imeta	contig000843	contig300949	Duplodnaviria	Heunggongvirae	Uroviricota	Caudoviricetes	[Novel_Order]_{class}_Caudoviricetes	[Novel_Family]_{class}_Caudoviricetes	[Novel_Genus]_{class}_Caudoviricetes	Viruses	1	dsDNAphage	1	2	classified	VC61551	FALSE	TRUE	temperate
ma2024imeta	contig000871	contig099183	Duplodnaviria	Heunggongvirae	Uroviricota	Caudoviricetes	[Novel_Order]_{class}_Caudoviricetes	[Novel_Family]_{class}_Caudoviricetes	[Novel_Genus]_{class}_Caudoviricetes	Viruses	1	dsDNAphage	1	3	classified	VC19967	FALSE	TRUE	temperate
ma2024imeta	contig000901	contig036529	Duplodnaviria	Heunggongvirae	Uroviricota	Caudoviricetes	[Novel_Order]_{class}_Caudoviricetes	[Novel_Family]_{class}_Caudoviricetes	[Novel_Genus]_{class}_Caudoviricetes	Viruses	1	dsDNAphage	1	1	classified	VC30303	FALSE	TRUE	temperate
ma2024imeta	contig001063	contig001063	Duplodnaviria	Heunggongvirae	Uroviricota	Caudoviricetes	[Novel_Order]_{class}_Caudoviricetes	[Novel_Family]_{class}_Caudoviricetes	[Novel_Genus]_{class}_Caudoviricetes	Viruses	1	dsDNAphage	1	1	classified	VC04806	FALSE	TRUE	virulent
ma2024imeta	contig001073	contig001073	Duplodnaviria	Heunggongvirae	Uroviricota	Caudoviricetes	[Novel_Order]_{class}_Caudoviricetes	[Novel_Family]_{class}_Caudoviricetes	[Novel_Genus]_{class}_Caudoviricetes	Viruses	0.993	dsDNAphage	1	1	classified	VC38441	FALSE	TRUE	virulent
ma2024imeta	contig001117	contig001117	Duplodnaviria	Heunggongvirae	Uroviricota	Caudoviricetes	[Novel_Order]_{class}_Caudoviricetes	[Novel_Family]_{class}_Caudoviricetes	[Novel_Genus]_{class}_Caudoviricetes	Viruses	0.98	dsDNAphage	1	1	classified	VC25493	FALSE	TRUE	temperate
ma2024imeta	contig001232	contig001232	Duplodnaviria	Heunggongvirae	Uroviricota	Caudoviricetes	[Novel_Order]_{class}_Caudoviricetes	[Novel_Family]_{class}_Caudoviricetes	[Novel_Genus]_{class}_Caudoviricetes	Viruses	1	dsDNAphage	1	1	classified	VC32465	FALSE	TRUE	virulent
ma2024imeta	contig001284	contig001284	Duplodnaviria	Heunggongvirae	Uroviricota	Caudoviricetes	[Novel_Order]_{class}_Caudoviricetes	[Novel_Family]_{class}_Caudoviricetes	[Novel_Genus]_{class}_Caudoviricetes	Viruses	0.993	dsDNAphage	1	1	classified	VC65035	FALSE	TRUE	temperate
ma2024imeta	contig001294	contig001294	Duplodnaviria	Heunggongvirae	Uroviricota	Caudoviricetes	[Novel_Order]_{class}_Caudoviricetes	[Novel_Family]_{class}_Caudoviricetes	[Novel_Genus]_{class}_Caudoviricetes	Viruses	1	dsDNAphage	1	1	classified	VC27010	FALSE	TRUE	virulent
ma2024imeta	contig001321	contig078810	Duplodnaviria	Heunggongvirae	Uroviricota	Caudoviricetes	[Novel_Order]_{class}_Caudoviricetes	[Novel_Family]_{class}_Caudoviricetes	[Novel_Genus]_{class}_Caudoviricetes	Viruses	1	dsDNAphage	1	1	classified	VC34101	FALSE	TRUE	temperate
ma2024imeta	contig001354	contig001354	Duplodnaviria	Heunggongvirae	Uroviricota	Caudoviricetes	[Novel_Order]_{class}_Caudoviricetes	[Novel_Family]_{class}_Caudoviricetes	[Novel_Genus]_{class}_Caudoviricetes	Viruses	0.98	dsDNAphage	1	4	classified	VC44982	FALSE	TRUE	virulent
ma2024imeta	contig001374	contig001374	Duplodnaviria	Heunggongvirae	Uroviricota	Caudoviricetes	[Novel_Order]_{class}_Caudoviricetes	[Novel_Family]_{class}_Caudoviricetes	[Novel_Genus]_{class}_Caudoviricetes	Viruses	1	dsDNAphage	1	1	classified	VC46907	FALSE	TRUE	virulent
ma2024imeta	contig001378	contig001378	Duplodnaviria	Heunggongvirae	Uroviricota	Caudoviricetes	[Novel_Order]_{class}_Caudoviricetes	[Novel_Family]_{class}_Caudoviricetes	[Novel_Genus]_{class}_Caudoviricetes	Viruses	1	dsDNAphage	1	1	classified	VC24942	FALSE	TRUE	virulent
ma2024imeta	contig001421	contig001421	Duplodnaviria	Heunggongvirae	Uroviricota	Caudoviricetes	[Novel_Order]_{class}_Caudoviricetes	[Novel_Family]_{class}_Caudoviricetes	[Novel_Genus]_{class}_Caudoviricetes	Viruses	1	dsDNAphage	1	4	classified	VC75249	FALSE	TRUE	virulent
ma2024imeta	contig001481	contig001481	Duplodnaviria	Heunggongvirae	Uroviricota	Caudoviricetes	[Novel_Order]_{class}_Caudoviricetes	[Novel_Family]_{class}_Caudoviricetes	[Novel_Genus]_{class}_Caudoviricetes	Viruses	1	dsDNAphage	1	1	classified	VC66023	FALSE	TRUE	virulent
ma2024imeta	contig001486	contig001486	Duplodnaviria	Heunggongvirae	Uroviricota	Caudoviricetes	[Novel_Order]_{class}_Caudoviricetes	[Novel_Family]_{class}_Caudoviricetes	[Novel_Genus]_{class}_Caudoviricetes	Viruses	0.987	dsDNAphage	1	1	classified	VC25317	FALSE	TRUE	virulent
ma2024imeta	contig001496	contig001496	Duplodnaviria	Heunggongvirae	Uroviricota	Caudoviricetes	[Novel_Order]_{class}_Caudoviricetes	[Novel_Family]_{class}_Caudoviricetes	[Novel_Genus]_{class}_Caudoviricetes	Viruses	1	dsDNAphage	1	1	classified	VC46012	FALSE	TRUE	virulent
ma2024imeta	contig001564	contig001564	Duplodnaviria	Heunggongvirae	Uroviricota	Caudoviricetes	[Novel_Order]_{class}_Caudoviricetes	[Novel_Family]_{class}_Caudoviricetes	[Novel_Genus]_{class}_Caudoviricetes	Viruses	1	dsDNAphage	1	1	classified	VC11392	FALSE	TRUE	temperate
ma2024imeta	contig001588	contig001588	Duplodnaviria	Heunggongvirae	Uroviricota	Caudoviricetes	[Novel_Order]_{class}_Caudoviricetes	[Novel_Family]_{class}_Caudoviricetes	[Novel_Genus]_{class}_Caudoviricetes	Viruses	0.993	dsDNAphage	1	3	classified	VC19955	FALSE	TRUE	virulent
ma2024imeta	contig001601	contig001601	Duplodnaviria	Heunggongvirae	Uroviricota	Caudoviricetes	Crassvirales	Suoliviridae	[Novel_Genus]_{family}_Suoliviridae	Viruses	0.993	dsDNAphage	1	1	classified	VC00293	FALSE	TRUE	virulent
ma2024imeta	contig001632	contig001632	Duplodnaviria	Heunggongvirae	Uroviricota	Caudoviricetes	[Novel_Order]_{class}_Caudoviricetes	[Novel_Family]_{class}_Caudoviricetes	[Novel_Genus]_{class}_Caudoviricetes	Viruses	1	dsDNAphage	1	1	classified	VC44280	FALSE	TRUE	temperate
ma2024imeta	contig001645	contig001645	Duplodnaviria	Heunggongvirae	Uroviricota	Caudoviricetes	[Novel_Order]_{class}_Caudoviricetes	[Novel_Family]_{class}_Caudoviricetes	[Novel_Genus]_{class}_Caudoviricetes	Viruses	0.993	dsDNAphage	1	1	classified	VC65382	FALSE	TRUE	virulent
ma2024imeta	contig001650	contig001650	Duplodnaviria	Heunggongvirae	Uroviricota	Caudoviricetes	[Novel_Order]_{class}_Caudoviricetes	[Novel_Family]_{class}_Caudoviricetes	[Novel_Genus]_{class}_Caudoviricetes	Viruses	1	dsDNAphage	1	1	classified	VC69442	FALSE	TRUE	virulent
ma2024imeta	contig001779	contig036728	Duplodnaviria	Heunggongvirae	Uroviricota	Caudoviricetes	[Novel_Order]_{class}_Caudoviricetes	[Novel_Family]_{class}_Caudoviricetes	[Novel_Genus]_{class}_Caudoviricetes	Viruses	1	dsDNAphage	1	3	classified	VC69171	FALSE	TRUE	virulent
ma2024imeta	contig001795	contig001795	Duplodnaviria	Heunggongvirae	Uroviricota	Caudoviricetes	[Novel_Order]_{class}_Caudoviricetes	[Novel_Family]_{class}_Caudoviricetes	[Novel_Genus]_{class}_Caudoviricetes	Viruses	0.993	dsDNAphage	1	1	classified	VC40090	FALSE	TRUE	temperate
ma2024imeta	contig001838	contig281199	Duplodnaviria	Heunggongvirae	Uroviricota	Caudoviricetes	[Novel_Order]_{class}_Caudoviricetes	[Novel_Family]_{class}_Caudoviricetes	[Novel_Genus]_{class}_Caudoviricetes	Viruses	1	dsDNAphage	1	4	classified	VC75166	FALSE	TRUE	virulent
ma2024imeta	contig001861	contig001861	Duplodnaviria	Heunggongvirae	Uroviricota	Caudoviricetes	[Novel_Order]_{class}_Caudoviricetes	[Novel_Family]_{class}_Caudoviricetes	[Novel_Genus]_{class}_Caudoviricetes	Viruses	1	dsDNAphage	1	1	classified	VC30825	FALSE	TRUE	temperate
ma2024imeta	contig001866	contig001866	Duplodnaviria	Heunggongvirae	Uroviricota	Caudoviricetes	[Novel_Order]_{class}_Caudoviricetes	[Novel_Family]_{class}_Caudoviricetes	[Novel_Genus]_{class}_Caudoviricetes	Viruses	1	dsDNAphage	1	3	classified	VC10319	FALSE	TRUE	temperate
ma2024imeta	contig001915	contig132730	Duplodnaviria	Heunggongvirae	Uroviricota	Caudoviricetes	[Novel_Order]_{class}_Caudoviricetes	[Novel_Family]_{class}_Caudoviricetes	[Novel_Genus]_{class}_Caudoviricetes	Viruses	1	dsDNAphage	1	1	classified	VC31630	FALSE	TRUE	virulent
ma2024imeta	contig001923	contig276153	Duplodnaviria	Heunggongvirae	Uroviricota	Caudoviricetes	[Novel_Order]_{class}_Caudoviricetes	[Novel_Family]_{class}_Caudoviricetes	[Novel_Genus]_{class}_Caudoviricetes	Viruses	1	dsDNAphage	1	1	classified	VC32005	FALSE	TRUE	virulent
ma2024imeta	contig001956	contig001956	Monodnaviria	Sangervirae	Phixviricota	Malgrandaviricetes	Petitvirales	Microviridae	[Novel_Genus]_{family}_Microviridae	Viruses	0.987	dsDNAphage	1	1	unclassified	VC77580	FALSE	FALSE	virulent
ma2024imeta	contig001989	contig001989	Duplodnaviria	Heunggongvirae	Uroviricota	Caudoviricetes	[Novel_Order]_{class}_Caudoviricetes	[Novel_Family]_{class}_Caudoviricetes	[Novel_Genus]_{class}_Caudoviricetes	Viruses	1	dsDNAphage	1	1	classified	VC20259	FALSE	TRUE	temperate
ma2024imeta	contig001990	contig001990	Duplodnaviria	Heunggongvirae	Uroviricota	Caudoviricetes	[Novel_Order]_{class}_Caudoviricetes	[Novel_Family]_{class}_Caudoviricetes	[Novel_Genus]_{class}_Caudoviricetes	Viruses	0.98	dsDNAphage	1	1	classified	VC37860	FALSE	TRUE	virulent
ma2024imeta	contig001993	contig001993	Duplodnaviria	Heunggongvirae	Uroviricota	Caudoviricetes	[Novel_Order]_{class}_Caudoviricetes	[Novel_Family]_{class}_Caudoviricetes	[Novel_Genus]_{class}_Caudoviricetes	Viruses	0.987	dsDNAphage	1	1	classified	VC19383	FALSE	TRUE	temperate
ma2024imeta	contig002098	contig002098	Duplodnaviria	Heunggongvirae	Uroviricota	Caudoviricetes	[Novel_Order]_{class}_Caudoviricetes	[Novel_Family]_{class}_Caudoviricetes	[Novel_Genus]_{class}_Caudoviricetes	Viruses	1	dsDNAphage	1	4	classified	VC23411	FALSE	TRUE	temperate
ma2024imeta	contig002173	contig002173	Duplodnaviria	Heunggongvirae	Uroviricota	Caudoviricetes	[Novel_Order]_{class}_Caudoviricetes	[Novel_Family]_{class}_Caudoviricetes	[Novel_Genus]_{class}_Caudoviricetes	Viruses	1	dsDNAphage	1	2	classified	VC27582	FALSE	TRUE	virulent
ma2024imeta	contig002196	contig002196	Duplodnaviria	Heunggongvirae	Uroviricota	Caudoviricetes	[Novel_Order]_{class}_Caudoviricetes	[Novel_Family]_{class}_Caudoviricetes	[Novel_Genus]_{class}_Caudoviricetes	Viruses	0.993	dsDNAphage	1	2	classified	VC52244	FALSE	TRUE	temperate
ma2024imeta	contig002228	contig300599	Duplodnaviria	Heunggongvirae	Uroviricota	Caudoviricetes	[Novel_Order]_{class}_Caudoviricetes	[Novel_Family]_{class}_Caudoviricetes	[Novel_Genus]_{class}_Caudoviricetes	Viruses	1	dsDNAphage	1	2	classified	VC61641	FALSE	TRUE	temperate
ma2024imeta	contig002248	contig002248	Duplodnaviria	Heunggongvirae	Uroviricota	Caudoviricetes	[Novel_Order]_{class}_Caudoviricetes	[Novel_Family]_{class}_Caudoviricetes	[Novel_Genus]_{class}_Caudoviricetes	Viruses	0.993	dsDNAphage	1	2	classified	VC39990	FALSE	TRUE	virulent
ma2024imeta	contig002295	contig002295	Duplodnaviria	Heunggongvirae	Uroviricota	Caudoviricetes	[Novel_Order]_{class}_Caudoviricetes	[Novel_Family]_{class}_Caudoviricetes	[Novel_Genus]_{class}_Caudoviricetes	Viruses	0.98	dsDNAphage	1	2	classified	VC41958	FALSE	TRUE	temperate
ma2024imeta	contig002349	contig264061	Duplodnaviria	Heunggongvirae	Uroviricota	Caudoviricetes	[Novel_Order]_{class}_Caudoviricetes	[Novel_Family]_{class}_Caudoviricetes	[Novel_Genus]_{class}_Caudoviricetes	Viruses	1	dsDNAphage	1	1	classified	VC57189	FALSE	TRUE	virulent
ma2024imeta	contig002412	contig002412	Duplodnaviria	Heunggongvirae	Uroviricota	Caudoviricetes	[Novel_Order]_{class}_Caudoviricetes	[Novel_Family]_{class}_Caudoviricetes	[Novel_Genus]_{class}_Caudoviricetes	Viruses	1	dsDNAphage	1	1	classified	VC61956	FALSE	TRUE	virulent
ma2024imeta	contig002419	contig183181	Duplodnaviria	Heunggongvirae	Uroviricota	Caudoviricetes	[Novel_Order]_{class}_Caudoviricetes	[Novel_Family]_{class}_Caudoviricetes	[Novel_Genus]_{class}_Caudoviricetes	Viruses	1	dsDNAphage	1	1	classified	VC21215	FALSE	TRUE	virulent
ma2024imeta	contig002420	contig002420	Duplodnaviria	Heunggongvirae	Uroviricota	Caudoviricetes	[Novel_Order]_{class}_Caudoviricetes	[Novel_Family]_{class}_Caudoviricetes	[Novel_Genus]_{class}_Caudoviricetes	Viruses	1	dsDNAphage	1	1	classified	VC24894	FALSE	TRUE	temperate
ma2024imeta	contig002428	contig002428	Duplodnaviria	Heunggongvirae	Uroviricota	Caudoviricetes	[Novel_Order]_{class}_Caudoviricetes	[Novel_Family]_{class}_Caudoviricetes	[Novel_Genus]_{class}_Caudoviricetes	Viruses	1	dsDNAphage	1	4	classified	VC75423	FALSE	TRUE	virulent
ma2024imeta	contig002431	contig002431	Duplodnaviria	Heunggongvirae	Uroviricota	Caudoviricetes	[Novel_Order]_{class}_Caudoviricetes	[Novel_Family]_{class}_Caudoviricetes	[Novel_Genus]_{class}_Caudoviricetes	Viruses	0.973	dsDNAphage	1	1	classified	VC45737	FALSE	TRUE	virulent
ma2024imeta	contig002432	contig002432	Duplodnaviria	Heunggongvirae	Uroviricota	Caudoviricetes	[Novel_Order]_{class}_Caudoviricetes	[Novel_Family]_{class}_Caudoviricetes	[Novel_Genus]_{class}_Caudoviricetes	Viruses	1	dsDNAphage	1	1	classified	VC61954	FALSE	TRUE	virulent
ma2024imeta	contig002433	contig002433	Duplodnaviria	Heunggongvirae	Uroviricota	Caudoviricetes	[Novel_Order]_{class}_Caudoviricetes	[Novel_Family]_{class}_Caudoviricetes	[Novel_Genus]_{class}_Caudoviricetes	Viruses	1	dsDNAphage	1	1	classified	VC57073	FALSE	TRUE	temperate
ma2024imeta	contig002435	contig002435	Duplodnaviria	Heunggongvirae	Uroviricota	Caudoviricetes	[Novel_Order]_{class}_Caudoviricetes	[Novel_Family]_{class}_Caudoviricetes	[Novel_Genus]_{class}_Caudoviricetes	Viruses	1	dsDNAphage	1	1	classified	VC20417	FALSE	TRUE	temperate
ma2024imeta	contig002438	contig002438	Duplodnaviria	Heunggongvirae	Uroviricota	Caudoviricetes	[Novel_Order]_{class}_Caudoviricetes	[Novel_Family]_{class}_Caudoviricetes	[Novel_Genus]_{class}_Caudoviricetes	Viruses	1	dsDNAphage	1	1	classified	VC71205	FALSE	TRUE	virulent
ma2024imeta	contig002441	contig002441	Duplodnaviria	Heunggongvirae	Uroviricota	Caudoviricetes	[Novel_Order]_{class}_Caudoviricetes	[Novel_Family]_{class}_Caudoviricetes	[Novel_Genus]_{class}_Caudoviricetes	Viruses	1	dsDNAphage	1	1	classified	VC28537	FALSE	TRUE	temperate
ma2024imeta	contig002522	contig001833	Duplodnaviria	Heunggongvirae	Uroviricota	Caudoviricetes	[Novel_Order]_{class}_Caudoviricetes	[Novel_Family]_{class}_Caudoviricetes	[Novel_Genus]_{class}_Caudoviricetes	Viruses	1	dsDNAphage	1	3	classified	VC76022	FALSE	TRUE	virulent
ma2024imeta	contig002579	contig002579	Duplodnaviria	Heunggongvirae	Uroviricota	Caudoviricetes	[Novel_Order]_{class}_Caudoviricetes	[Novel_Family]_{class}_Caudoviricetes	[Novel_Genus]_{class}_Caudoviricetes	Viruses	1	dsDNAphage	1	1	classified	VC46907	FALSE	TRUE	virulent
ma2024imeta	contig002634	contig002634	Duplodnaviria	Heunggongvirae	Uroviricota	Caudoviricetes	[Novel_Order]_{class}_Caudoviricetes	[Novel_Family]_{class}_Caudoviricetes	[Novel_Genus]_{class}_Caudoviricetes	Viruses	1	dsDNAphage	1	4	classified	VC75357	FALSE	TRUE	virulent
ma2024imeta	contig002671	contig002671	Duplodnaviria	Heunggongvirae	Uroviricota	Caudoviricetes	[Novel_Order]_{class}_Caudoviricetes	[Novel_Family]_{class}_Caudoviricetes	[Novel_Genus]_{class}_Caudoviricetes	Viruses	1	dsDNAphage	1	3	classified	VC16121	FALSE	TRUE	virulent
ma2024imeta	contig002673	contig002673	Duplodnaviria	Heunggongvirae	Uroviricota	Caudoviricetes	[Novel_Order]_{class}_Caudoviricetes	[Novel_Family]_{class}_Caudoviricetes	[Novel_Genus]_{class}_Caudoviricetes	Viruses	1	dsDNAphage	1	1	classified	VC45454	FALSE	TRUE	virulent
ma2024imeta	contig002714	contig002714	Duplodnaviria	Heunggongvirae	Uroviricota	Caudoviricetes	[Novel_Order]_{class}_Caudoviricetes	[Novel_Family]_{class}_Caudoviricetes	[Novel_Genus]_{class}_Caudoviricetes	Viruses	1	dsDNAphage	1	2	classified	VC71246	FALSE	TRUE	virulent
ma2024imeta	contig002723	contig002723	Duplodnaviria	Heunggongvirae	Uroviricota	Caudoviricetes	[Novel_Order]_{class}_Caudoviricetes	[Novel_Family]_{class}_Caudoviricetes	[Novel_Genus]_{class}_Caudoviricetes	Viruses	1	dsDNAphage	1	1	classified	VC49239	FALSE	TRUE	virulent
ma2024imeta	contig002738	contig002738	Duplodnaviria	Heunggongvirae	Uroviricota	Caudoviricetes	[Novel_Order]_{class}_Caudoviricetes	[Novel_Family]_{class}_Caudoviricetes	[Novel_Genus]_{class}_Caudoviricetes	Viruses	1	dsDNAphage	1	1	classified	VC33811	FALSE	TRUE	temperate
ma2024imeta	contig002754	contig002754	Duplodnaviria	Heunggongvirae	Uroviricota	Caudoviricetes	[Novel_Order]_{class}_Caudoviricetes	[Novel_Family]_{class}_Caudoviricetes	[Novel_Genus]_{class}_Caudoviricetes	Viruses	1	dsDNAphage	1	2	classified	VC16810	FALSE	TRUE	virulent
ma2024imeta	contig002850	contig136395	Duplodnaviria	Heunggongvirae	Uroviricota	Caudoviricetes	[Novel_Order]_{class}_Caudoviricetes	[Novel_Family]_{class}_Caudoviricetes	[Novel_Genus]_{class}_Caudoviricetes	Viruses	1	dsDNAphage	1	2	classified	VC58203	FALSE	TRUE	temperate
ma2024imeta	contig002862	contig239540	Duplodnaviria	Heunggongvirae	Uroviricota	Caudoviricetes	[Novel_Order]_{class}_Caudoviricetes	[Novel_Family]_{class}_Caudoviricetes	[Novel_Genus]_{class}_Caudoviricetes	Viruses	1	dsDNAphage	1	1	classified	VC02568	FALSE	TRUE	temperate
ma2024imeta	contig002887	contig002887	Duplodnaviria	Heunggongvirae	Uroviricota	Caudoviricetes	[Novel_Order]_{class}_Caudoviricetes	[Novel_Family]_{class}_Caudoviricetes	[Novel_Genus]_{class}_Caudoviricetes	Viruses	1	dsDNAphage	1	3	classified	VC09636	FALSE	TRUE	temperate
ma2024imeta	contig002890	contig002890	Duplodnaviria	Heunggongvirae	Uroviricota	Caudoviricetes	[Novel_Order]_{class}_Caudoviricetes	[Novel_Family]_{class}_Caudoviricetes	[Novel_Genus]_{class}_Caudoviricetes	Viruses	1	dsDNAphage	1	1	classified	VC30459	FALSE	TRUE	virulent
ma2024imeta	contig002994	contig003229	Duplodnaviria	Heunggongvirae	Uroviricota	Caudoviricetes	[Novel_Order]_{class}_Caudoviricetes	[Novel_Family]_{class}_Caudoviricetes	[Novel_Genus]_{class}_Caudoviricetes	Viruses	1	dsDNAphage	1	1	classified	VC15848	FALSE	TRUE	virulent
ma2024imeta	contig003002	contig003002	Duplodnaviria	Heunggongvirae	Uroviricota	Caudoviricetes	[Novel_Order]_{class}_Caudoviricetes	[Novel_Family]_{class}_Caudoviricetes	[Novel_Genus]_{class}_Caudoviricetes	Viruses	1	dsDNAphage	1	1	classified	VC65410	FALSE	TRUE	virulent
ma2024imeta	contig003003	contig003003	Duplodnaviria	Heunggongvirae	Uroviricota	Caudoviricetes	[Novel_Order]_{class}_Caudoviricetes	[Novel_Family]_{class}_Caudoviricetes	[Novel_Genus]_{class}_Caudoviricetes	Viruses	1	dsDNAphage	1	1	classified	VC40777	FALSE	TRUE	temperate
ma2024imeta	contig003006	contig003006	Duplodnaviria	Heunggongvirae	Uroviricota	Caudoviricetes	[Novel_Order]_{class}_Caudoviricetes	[Novel_Family]_{class}_Caudoviricetes	[Novel_Genus]_{class}_Caudoviricetes	Viruses	1	dsDNAphage	1	1	classified	VC62018	FALSE	TRUE	virulent
ma2024imeta	contig003007	contig003007	Duplodnaviria	Heunggongvirae	Uroviricota	Caudoviricetes	[Novel_Order]_{class}_Caudoviricetes	[Novel_Family]_{class}_Caudoviricetes	[Novel_Genus]_{class}_Caudoviricetes	Viruses	0.993	dsDNAphage	1	1	classified	VC58271	FALSE	TRUE	temperate
ma2024imeta	contig003012	contig003012	Duplodnaviria	Heunggongvirae	Uroviricota	Caudoviricetes	[Novel_Order]_{class}_Caudoviricetes	[Novel_Family]_{class}_Caudoviricetes	[Novel_Genus]_{class}_Caudoviricetes	Viruses	0.993	dsDNAphage	1	1	classified	VC56662	FALSE	TRUE	virulent
ma2024imeta	contig003015	contig035590	Duplodnaviria	Heunggongvirae	Uroviricota	Caudoviricetes	[Novel_Order]_{class}_Caudoviricetes	[Novel_Family]_{class}_Caudoviricetes	[Novel_Genus]_{class}_Caudoviricetes	Viruses	1	dsDNAphage	1	1	classified	VC45011	FALSE	TRUE	virulent
ma2024imeta	contig003016	contig003016	Duplodnaviria	Heunggongvirae	Uroviricota	Caudoviricetes	[Novel_Order]_{class}_Caudoviricetes	[Novel_Family]_{class}_Caudoviricetes	[Novel_Genus]_{class}_Caudoviricetes	Viruses	0.993	dsDNAphage	1	1	classified	VC66329	FALSE	TRUE	temperate
ma2024imeta	contig003017	contig003017	Monodnaviria	Sangervirae	Phixviricota	Malgrandaviricetes	Petitvirales	Microviridae	[Novel_Genus]_{family}_Microviridae	Viruses	0.96	lavidaviridae	2	1	unclassified	VC77581	FALSE	FALSE	virulent
ma2024imeta	contig003020	contig003020	Monodnaviria	Sangervirae	Phixviricota	Malgrandaviricetes	Petitvirales	Microviridae	[Novel_Genus]_{family}_Microviridae	Viruses	0.993	dsDNAphage	1	1	unclassified	VC77582	FALSE	FALSE	virulent
ma2024imeta	contig003075	contig003075	Duplodnaviria	Heunggongvirae	Uroviricota	Caudoviricetes	[Novel_Order]_{class}_Caudoviricetes	[Novel_Family]_{class}_Caudoviricetes	[Novel_Genus]_{class}_Caudoviricetes	Viruses	1	dsDNAphage	1	1	classified	VC38489	FALSE	TRUE	virulent
ma2024imeta	contig003127	contig003127	Duplodnaviria	Heunggongvirae	Uroviricota	Caudoviricetes	[Novel_Order]_{class}_Caudoviricetes	[Novel_Family]_{class}_Caudoviricetes	[Novel_Genus]_{class}_Caudoviricetes	Viruses	0.993	dsDNAphage	1	4	classified	VC25035	FALSE	TRUE	virulent
ma2024imeta	contig003212	contig003212	Duplodnaviria	Heunggongvirae	Uroviricota	Caudoviricetes	[Novel_Order]_{class}_Caudoviricetes	[Novel_Family]_{class}_Caudoviricetes	[Novel_Genus]_{class}_Caudoviricetes	Viruses	0.993	dsDNAphage	1	2	classified	VC34578	FALSE	TRUE	virulent
ma2024imeta	contig003217	contig288090	Duplodnaviria	Heunggongvirae	Uroviricota	Caudoviricetes	[Novel_Order]_{class}_Caudoviricetes	[Novel_Family]_{class}_Caudoviricetes	[Novel_Genus]_{class}_Caudoviricetes	Viruses	0.987	dsDNAphage	1	1	classified	VC25496	FALSE	TRUE	temperate
ma2024imeta	contig003224	contig300831	Duplodnaviria	Heunggongvirae	Uroviricota	Caudoviricetes	[Novel_Order]_{class}_Caudoviricetes	[Novel_Family]_{class}_Caudoviricetes	[Novel_Genus]_{class}_Caudoviricetes	Viruses	1	dsDNAphage	1	1	classified	VC61625	FALSE	TRUE	temperate
ma2024imeta	contig003275	contig003275	Duplodnaviria	Heunggongvirae	Uroviricota	Caudoviricetes	[Novel_Order]_{class}_Caudoviricetes	[Novel_Family]_{class}_Caudoviricetes	[Novel_Genus]_{class}_Caudoviricetes	Viruses	0.933	dsDNAphage	1	4	classified	VC30241	FALSE	TRUE	temperate
ma2024imeta	contig003290	contig004695	Duplodnaviria	Heunggongvirae	Uroviricota	Caudoviricetes	[Novel_Order]_{class}_Caudoviricetes	[Novel_Family]_{class}_Caudoviricetes	[Novel_Genus]_{class}_Caudoviricetes	Viruses	0.993	dsDNAphage	1	1	classified	VC10240	FALSE	TRUE	temperate
ma2024imeta	contig003315	contig003315	Duplodnaviria	Heunggongvirae	Uroviricota	Caudoviricetes	[Novel_Order]_{class}_Caudoviricetes	[Novel_Family]_{class}_Caudoviricetes	[Novel_Genus]_{class}_Caudoviricetes	Viruses	0.993	dsDNAphage	1	1	classified	VC27669	FALSE	TRUE	virulent
ma2024imeta	contig003321	contig003321	Duplodnaviria	Heunggongvirae	Uroviricota	Caudoviricetes	[Novel_Order]_{class}_Caudoviricetes	[Novel_Family]_{class}_Caudoviricetes	[Novel_Genus]_{class}_Caudoviricetes	Viruses	1	dsDNAphage	1	1	classified	VC27687	FALSE	TRUE	virulent
ma2024imeta	contig003355	contig003355	Duplodnaviria	Heunggongvirae	Uroviricota	Caudoviricetes	[Novel_Order]_{class}_Caudoviricetes	[Novel_Family]_{class}_Caudoviricetes	[Novel_Genus]_{class}_Caudoviricetes	Viruses	0.993	dsDNAphage	1	1	classified	VC27630	FALSE	TRUE	virulent
ma2024imeta	contig003376	contig003376	Duplodnaviria	Heunggongvirae	Uroviricota	Caudoviricetes	[Novel_Order]_{class}_Caudoviricetes	[Novel_Family]_{class}_Caudoviricetes	[Novel_Genus]_{class}_Caudoviricetes	Viruses	0.987	dsDNAphage	1	1	classified	VC27091	FALSE	TRUE	temperate
ma2024imeta	contig003438	contig003438	Duplodnaviria	Heunggongvirae	Uroviricota	Caudoviricetes	[Novel_Order]_{class}_Caudoviricetes	[Novel_Family]_{class}_Caudoviricetes	[Novel_Genus]_{class}_Caudoviricetes	Viruses	1	dsDNAphage	1	1	classified	VC39990	FALSE	TRUE	virulent
ma2024imeta	contig003440	contig003440	Monodnaviria	Sangervirae	Phixviricota	Malgrandaviricetes	Petitvirales	Microviridae	[Novel_Genus]_{family}_Microviridae	Viruses	1	dsDNAphage	1	1	unclassified	VC77583	FALSE	FALSE	virulent
ma2024imeta	contig003479	contig003479	Duplodnaviria	Heunggongvirae	Uroviricota	Caudoviricetes	[Novel_Order]_{class}_Caudoviricetes	[Novel_Family]_{class}_Caudoviricetes	[Novel_Genus]_{class}_Caudoviricetes	Viruses	1	dsDNAphage	1	4	classified	VC49043	FALSE	TRUE	virulent
ma2024imeta	contig003522	contig003522	Duplodnaviria	Heunggongvirae	Uroviricota	Caudoviricetes	[Novel_Order]_{class}_Caudoviricetes	[Novel_Family]_{class}_Caudoviricetes	[Novel_Genus]_{class}_Caudoviricetes	Viruses	1	dsDNAphage	1	1	classified	VC45445	FALSE	TRUE	virulent
ma2024imeta	contig003524	contig003524	Duplodnaviria	Heunggongvirae	Uroviricota	Caudoviricetes	[Novel_Order]_{class}_Caudoviricetes	[Novel_Family]_{class}_Caudoviricetes	[Novel_Genus]_{class}_Caudoviricetes	Viruses	0.993	dsDNAphage	1	1	classified	VC26876	FALSE	TRUE	virulent
ma2024imeta	contig003545	contig003545	Duplodnaviria	Heunggongvirae	Uroviricota	Caudoviricetes	[Novel_Order]_{class}_Caudoviricetes	[Novel_Family]_{class}_Caudoviricetes	[Novel_Genus]_{class}_Caudoviricetes	Viruses	1	dsDNAphage	1	3	classified	VC76290	FALSE	TRUE	virulent
ma2024imeta	contig003579	contig003579	Duplodnaviria	Heunggongvirae	Uroviricota	Caudoviricetes	[Novel_Order]_{class}_Caudoviricetes	[Novel_Family]_{class}_Caudoviricetes	[Novel_Genus]_{class}_Caudoviricetes	Viruses	1	dsDNAphage	1	4	classified	VC68884	FALSE	TRUE	virulent
ma2024imeta	contig003605	contig142434	Duplodnaviria	Heunggongvirae	Uroviricota	Caudoviricetes	[Novel_Order]_{class}_Caudoviricetes	[Novel_Family]_{class}_Caudoviricetes	[Novel_Genus]_{class}_Caudoviricetes	Viruses	1	dsDNAphage	1	3	classified	VC57016	FALSE	TRUE	temperate
ma2024imeta	contig003641	contig003641	Duplodnaviria	Heunggongvirae	Uroviricota	Caudoviricetes	[Novel_Order]_{class}_Caudoviricetes	[Novel_Family]_{class}_Caudoviricetes	[Novel_Genus]_{class}_Caudoviricetes	Viruses	1	dsDNAphage	1	1	classified	VC24912	FALSE	TRUE	virulent
ma2024imeta	contig003650	contig003650	Duplodnaviria	Heunggongvirae	Uroviricota	Caudoviricetes	[Novel_Order]_{class}_Caudoviricetes	[Novel_Family]_{class}_Caudoviricetes	[Novel_Genus]_{class}_Caudoviricetes	Viruses	0.993	dsDNAphage	1	1	classified	VC37901	FALSE	TRUE	virulent
ma2024imeta	contig003651	contig003651	Monodnaviria	Sangervirae	Phixviricota	Malgrandaviricetes	Petitvirales	Microviridae	[Novel_Genus]_{family}_Microviridae	Viruses	1	dsDNAphage	1	1	unclassified	VC77584	FALSE	FALSE	virulent
ma2024imeta	contig003652	contig003652	Duplodnaviria	Heunggongvirae	Uroviricota	Caudoviricetes	[Novel_Order]_{class}_Caudoviricetes	[Novel_Family]_{class}_Caudoviricetes	[Novel_Genus]_{class}_Caudoviricetes	Viruses	0.993	dsDNAphage	1	3	classified	VC25040	FALSE	TRUE	virulent
ma2024imeta	contig003714	contig003714	Monodnaviria	Sangervirae	Phixviricota	Malgrandaviricetes	Petitvirales	Microviridae	[Novel_Genus]_{family}_Microviridae	Viruses	1	dsDNAphage	1	4	unclassified	VC77585	FALSE	FALSE	virulent
ma2024imeta	contig003771	contig003771	Duplodnaviria	Heunggongvirae	Uroviricota	Caudoviricetes	[Novel_Order]_{class}_Caudoviricetes	[Novel_Family]_{class}_Caudoviricetes	[Novel_Genus]_{class}_Caudoviricetes	Viruses	0.993	dsDNAphage	1	2	classified	VC46907	FALSE	TRUE	virulent
ma2024imeta	contig003776	contig245511	Duplodnaviria	Heunggongvirae	Uroviricota	Caudoviricetes	[Novel_Order]_{class}_Caudoviricetes	[Novel_Family]_{class}_Caudoviricetes	[Novel_Genus]_{class}_Caudoviricetes	Viruses	0.993	dsDNAphage	1	4	classified	VC40908	FALSE	TRUE	temperate
ma2024imeta	contig003823	contig003823	Duplodnaviria	Heunggongvirae	Uroviricota	Caudoviricetes	[Novel_Order]_{class}_Caudoviricetes	[Novel_Family]_{class}_Caudoviricetes	[Novel_Genus]_{class}_Caudoviricetes	Viruses	0.973	dsDNAphage	1	1	classified	VC13136	FALSE	TRUE	temperate
ma2024imeta	contig003970	contig003970	Duplodnaviria	Heunggongvirae	Uroviricota	Caudoviricetes	[Novel_Order]_{class}_Caudoviricetes	[Novel_Family]_{class}_Caudoviricetes	[Novel_Genus]_{class}_Caudoviricetes	Viruses	1	dsDNAphage	1	1	classified	VC69171	FALSE	TRUE	virulent
ma2024imeta	contig003972	contig003972	Duplodnaviria	Heunggongvirae	Uroviricota	Caudoviricetes	[Novel_Order]_{class}_Caudoviricetes	[Novel_Family]_{class}_Caudoviricetes	[Novel_Genus]_{class}_Caudoviricetes	Viruses	1	dsDNAphage	1	1	classified	VC30918	FALSE	TRUE	temperate
ma2024imeta	contig003982	contig003982	Duplodnaviria	Heunggongvirae	Uroviricota	Caudoviricetes	[Novel_Order]_{class}_Caudoviricetes	[Novel_Family]_{class}_Caudoviricetes	[Novel_Genus]_{class}_Caudoviricetes	Viruses	1	dsDNAphage	1	1	classified	VC65314	FALSE	TRUE	virulent
ma2024imeta	contig004015	contig004015	Duplodnaviria	Heunggongvirae	Uroviricota	Caudoviricetes	[Novel_Order]_{class}_Caudoviricetes	[Novel_Family]_{class}_Caudoviricetes	[Novel_Genus]_{class}_Caudoviricetes	Viruses	1	dsDNAphage	1	4	classified	VC45002	FALSE	TRUE	virulent
ma2024imeta	contig004087	contig004087	Duplodnaviria	Heunggongvirae	Uroviricota	Caudoviricetes	[Novel_Order]_{class}_Caudoviricetes	[Novel_Family]_{class}_Caudoviricetes	[Novel_Genus]_{class}_Caudoviricetes	Viruses	0.993	dsDNAphage	1	3	classified	VC64254	FALSE	TRUE	temperate
ma2024imeta	contig004151	contig004151	Duplodnaviria	Heunggongvirae	Uroviricota	Caudoviricetes	[Novel_Order]_{class}_Caudoviricetes	[Novel_Family]_{class}_Caudoviricetes	[Novel_Genus]_{class}_Caudoviricetes	Viruses	0.98	dsDNAphage	1	4	classified	VC62945	FALSE	TRUE	temperate
ma2024imeta	contig004189	contig004189	Duplodnaviria	Heunggongvirae	Uroviricota	Caudoviricetes	[Novel_Order]_{class}_Caudoviricetes	[Novel_Family]_{class}_Caudoviricetes	[Novel_Genus]_{class}_Caudoviricetes	Viruses	1	dsDNAphage	1	4	classified	VC23580	FALSE	TRUE	virulent
ma2024imeta	contig004200	contig004200	Duplodnaviria	Heunggongvirae	Uroviricota	Caudoviricetes	[Novel_Order]_{class}_Caudoviricetes	[Novel_Family]_{class}_Caudoviricetes	[Novel_Genus]_{class}_Caudoviricetes	Viruses	0.98	dsDNAphage	1	3	classified	VC69049	FALSE	TRUE	temperate
ma2024imeta	contig004269	contig133007	Duplodnaviria	Heunggongvirae	Uroviricota	Caudoviricetes	[Novel_Order]_{class}_Caudoviricetes	[Novel_Family]_{class}_Caudoviricetes	[Novel_Genus]_{class}_Caudoviricetes	Viruses	1	dsDNAphage	1	3	classified	VC61388	FALSE	TRUE	temperate
ma2024imeta	contig004273	contig004273	Duplodnaviria	Heunggongvirae	Uroviricota	Caudoviricetes	[Novel_Order]_{class}_Caudoviricetes	[Novel_Family]_{class}_Caudoviricetes	[Novel_Genus]_{class}_Caudoviricetes	Viruses	0.973	dsDNAphage	1	1	classified	VC01836	FALSE	TRUE	temperate
ma2024imeta	contig004304	contig004304	Duplodnaviria	Heunggongvirae	Uroviricota	Caudoviricetes	[Novel_Order]_{class}_Caudoviricetes	[Novel_Family]_{class}_Caudoviricetes	[Novel_Genus]_{class}_Caudoviricetes	Viruses	0.987	dsDNAphage	1	1	classified	VC57589	FALSE	TRUE	virulent
ma2024imeta	contig004307	contig037872	Duplodnaviria	Heunggongvirae	Uroviricota	Caudoviricetes	[Novel_Order]_{class}_Caudoviricetes	[Novel_Family]_{class}_Caudoviricetes	[Novel_Genus]_{class}_Caudoviricetes	Viruses	1	dsDNAphage	1	3	classified	VC48809	FALSE	TRUE	virulent
ma2024imeta	contig004343	contig004343	Duplodnaviria	Heunggongvirae	Uroviricota	Caudoviricetes	[Novel_Order]_{class}_Caudoviricetes	[Novel_Family]_{class}_Caudoviricetes	[Novel_Genus]_{class}_Caudoviricetes	Viruses	1	dsDNAphage	1	1	classified	VC45598	FALSE	TRUE	virulent
ma2024imeta	contig004346	contig004346	Duplodnaviria	Heunggongvirae	Uroviricota	Caudoviricetes	[Novel_Order]_{class}_Caudoviricetes	[Novel_Family]_{class}_Caudoviricetes	[Novel_Genus]_{class}_Caudoviricetes	Viruses	0.98	dsDNAphage	1	1	classified	VC31084	FALSE	TRUE	temperate
ma2024imeta	contig004360	contig004360	Duplodnaviria	Heunggongvirae	Uroviricota	Caudoviricetes	[Novel_Order]_{class}_Caudoviricetes	[Novel_Family]_{class}_Caudoviricetes	[Novel_Genus]_{class}_Caudoviricetes	Viruses	0.927	dsDNAphage	1	1	classified	VC06634	FALSE	TRUE	virulent
ma2024imeta	contig004362	contig004362	Duplodnaviria	Heunggongvirae	Uroviricota	Caudoviricetes	[Novel_Order]_{class}_Caudoviricetes	[Novel_Family]_{class}_Caudoviricetes	[Novel_Genus]_{class}_Caudoviricetes	Viruses	0.993	dsDNAphage	1	1	classified	VC30193	FALSE	TRUE	temperate
ma2024imeta	contig004363	contig004363	Duplodnaviria	Heunggongvirae	Uroviricota	Caudoviricetes	[Novel_Order]_{class}_Caudoviricetes	[Novel_Family]_{class}_Caudoviricetes	[Novel_Genus]_{class}_Caudoviricetes	Viruses	1	dsDNAphage	1	1	classified	VC62105	FALSE	TRUE	virulent
ma2024imeta	contig004365	contig004365	Duplodnaviria	Heunggongvirae	Uroviricota	Caudoviricetes	[Novel_Order]_{class}_Caudoviricetes	[Novel_Family]_{class}_Caudoviricetes	[Novel_Genus]_{class}_Caudoviricetes	Viruses	0.993	dsDNAphage	1	4	classified	VC35288	FALSE	TRUE	virulent
ma2024imeta	contig004405	contig004405	Duplodnaviria	Heunggongvirae	Uroviricota	Caudoviricetes	[Novel_Order]_{class}_Caudoviricetes	[Novel_Family]_{class}_Caudoviricetes	[Novel_Genus]_{class}_Caudoviricetes	Viruses	1	dsDNAphage	1	2	classified	VC34578	FALSE	TRUE	virulent
ma2024imeta	contig004498	contig004498	Duplodnaviria	Heunggongvirae	Uroviricota	Caudoviricetes	[Novel_Order]_{class}_Caudoviricetes	[Novel_Family]_{class}_Caudoviricetes	[Novel_Genus]_{class}_Caudoviricetes	Viruses	0.987	dsDNAphage	1	4	classified	VC76648	FALSE	TRUE	virulent
ma2024imeta	contig004511	contig004511	Duplodnaviria	Heunggongvirae	Uroviricota	Caudoviricetes	[Novel_Order]_{class}_Caudoviricetes	[Novel_Family]_{class}_Caudoviricetes	[Novel_Genus]_{class}_Caudoviricetes	Viruses	1	dsDNAphage	1	4	classified	VC75358	FALSE	TRUE	virulent
ma2024imeta	contig004520	contig004520	Duplodnaviria	Heunggongvirae	Uroviricota	Caudoviricetes	[Novel_Order]_{class}_Caudoviricetes	[Novel_Family]_{class}_Caudoviricetes	[Novel_Genus]_{class}_Caudoviricetes	Viruses	0.993	dsDNAphage	1	1	classified	VC52242	FALSE	TRUE	temperate
ma2024imeta	contig004538	contig004538	Duplodnaviria	Heunggongvirae	Uroviricota	Caudoviricetes	[Novel_Order]_{class}_Caudoviricetes	[Novel_Family]_{class}_Caudoviricetes	[Novel_Genus]_{class}_Caudoviricetes	Viruses	0.993	dsDNAphage	1	1	classified	VC27636	FALSE	TRUE	virulent
ma2024imeta	contig004543	contig004543	Duplodnaviria	Heunggongvirae	Uroviricota	Caudoviricetes	[Novel_Order]_{class}_Caudoviricetes	[Novel_Family]_{class}_Caudoviricetes	[Novel_Genus]_{class}_Caudoviricetes	Viruses	1	dsDNAphage	1	3	classified	VC10756	FALSE	TRUE	temperate
ma2024imeta	contig004566	contig004566	Duplodnaviria	Heunggongvirae	Uroviricota	Caudoviricetes	[Novel_Order]_{class}_Caudoviricetes	[Novel_Family]_{class}_Caudoviricetes	[Novel_Genus]_{class}_Caudoviricetes	Viruses	0.993	dsDNAphage	1	1	classified	VC33284	FALSE	TRUE	virulent
ma2024imeta	contig004650	contig004650	Duplodnaviria	Heunggongvirae	Uroviricota	Caudoviricetes	[Novel_Order]_{class}_Caudoviricetes	[Novel_Family]_{class}_Caudoviricetes	[Novel_Genus]_{class}_Caudoviricetes	Viruses	0.993	dsDNAphage	1	1	classified	VC31630	FALSE	TRUE	virulent
ma2024imeta	contig004665	contig131073	Duplodnaviria	Heunggongvirae	Uroviricota	Caudoviricetes	[Novel_Order]_{class}_Caudoviricetes	[Novel_Family]_{class}_Caudoviricetes	[Novel_Genus]_{class}_Caudoviricetes	Viruses	1	dsDNAphage	1	1	classified	VC33284	FALSE	TRUE	virulent
ma2024imeta	contig004733	contig004733	Duplodnaviria	Heunggongvirae	Uroviricota	Caudoviricetes	[Novel_Order]_{class}_Caudoviricetes	[Novel_Family]_{class}_Caudoviricetes	[Novel_Genus]_{class}_Caudoviricetes	Viruses	1	dsDNAphage	1	1	classified	VC27079	FALSE	TRUE	virulent
ma2024imeta	contig004744	contig004744	Duplodnaviria	Heunggongvirae	Uroviricota	Caudoviricetes	[Novel_Order]_{class}_Caudoviricetes	[Novel_Family]_{class}_Caudoviricetes	[Novel_Genus]_{class}_Caudoviricetes	Viruses	1	dsDNAphage	1	1	classified	VC57091	FALSE	TRUE	temperate
ma2024imeta	contig004835	contig004835	Duplodnaviria	Heunggongvirae	Uroviricota	Caudoviricetes	[Novel_Order]_{class}_Caudoviricetes	[Novel_Family]_{class}_Caudoviricetes	[Novel_Genus]_{class}_Caudoviricetes	Viruses	0.993	dsDNAphage	1	1	classified	VC72004	FALSE	TRUE	virulent
ma2024imeta	contig004893	contig004893	Duplodnaviria	Heunggongvirae	Uroviricota	Caudoviricetes	[Novel_Order]_{class}_Caudoviricetes	[Novel_Family]_{class}_Caudoviricetes	[Novel_Genus]_{class}_Caudoviricetes	Viruses	1	dsDNAphage	1	1	classified	VC25550	FALSE	TRUE	virulent
ma2024imeta	contig004963	contig004963	Duplodnaviria	Heunggongvirae	Uroviricota	Caudoviricetes	[Novel_Order]_{class}_Caudoviricetes	[Novel_Family]_{class}_Caudoviricetes	[Novel_Genus]_{class}_Caudoviricetes	Viruses	1	dsDNAphage	1	1	classified	VC27566	FALSE	TRUE	virulent
ma2024imeta	contig005116	contig005116	Duplodnaviria	Heunggongvirae	Uroviricota	Caudoviricetes	[Novel_Order]_{class}_Caudoviricetes	[Novel_Family]_{class}_Caudoviricetes	[Novel_Genus]_{class}_Caudoviricetes	Viruses	0.987	dsDNAphage	1	3	classified	VC20511	FALSE	TRUE	virulent
ma2024imeta	contig005351	contig005351	Duplodnaviria	Heunggongvirae	Uroviricota	Caudoviricetes	[Novel_Order]_{class}_Caudoviricetes	[Novel_Family]_{class}_Caudoviricetes	[Novel_Genus]_{class}_Caudoviricetes	Viruses	1	dsDNAphage	1	2	classified	VC36593	FALSE	TRUE	temperate
ma2024imeta	contig005480	contig005480	Duplodnaviria	Heunggongvirae	Uroviricota	Caudoviricetes	[Novel_Order]_{class}_Caudoviricetes	[Novel_Family]_{class}_Caudoviricetes	[Novel_Genus]_{class}_Caudoviricetes	Viruses	1	dsDNAphage	1	1	classified	VC25254	FALSE	TRUE	temperate
ma2024imeta	contig005493	contig005493	Duplodnaviria	Heunggongvirae	Uroviricota	Caudoviricetes	[Novel_Order]_{class}_Caudoviricetes	[Novel_Family]_{class}_Caudoviricetes	[Novel_Genus]_{class}_Caudoviricetes	Viruses	1	dsDNAphage	1	1	classified	VC67862	FALSE	TRUE	virulent
ma2024imeta	contig005611	contig005611	Duplodnaviria	Heunggongvirae	Uroviricota	Caudoviricetes	[Novel_Order]_{class}_Caudoviricetes	[Novel_Family]_{class}_Caudoviricetes	[Novel_Genus]_{class}_Caudoviricetes	Viruses	1	dsDNAphage	1	1	classified	VC20708	FALSE	TRUE	virulent
ma2024imeta	contig005623	contig005623	Duplodnaviria	Heunggongvirae	Uroviricota	Caudoviricetes	[Novel_Order]_{class}_Caudoviricetes	[Novel_Family]_{class}_Caudoviricetes	[Novel_Genus]_{class}_Caudoviricetes	Viruses	1	dsDNAphage	1	1	classified	VC30843	FALSE	TRUE	temperate
ma2024imeta	contig005668	contig020912	Duplodnaviria	Heunggongvirae	Uroviricota	Caudoviricetes	[Novel_Order]_{class}_Caudoviricetes	[Novel_Family]_{class}_Caudoviricetes	[Novel_Genus]_{class}_Caudoviricetes	Viruses	0.967	dsDNAphage	1	3	classified	VC48494	FALSE	TRUE	temperate
ma2024imeta	contig005799	contig005799	Duplodnaviria	Heunggongvirae	Uroviricota	Caudoviricetes	[Novel_Order]_{class}_Caudoviricetes	[Novel_Family]_{class}_Caudoviricetes	[Novel_Genus]_{class}_Caudoviricetes	Viruses	0.993	dsDNAphage	1	3	classified	VC63546	FALSE	TRUE	temperate
ma2024imeta	contig005800	contig005800	Duplodnaviria	Heunggongvirae	Uroviricota	Caudoviricetes	Crassvirales	[Novel_Family]_{order}_Crassvirales	[Novel_Genus]_{order}_Crassvirales	Viruses	1	dsDNAphage	1	1	classified	VC00088	FALSE	TRUE	virulent
ma2024imeta	contig005827	contig048274	Duplodnaviria	Heunggongvirae	Uroviricota	Caudoviricetes	[Novel_Order]_{class}_Caudoviricetes	[Novel_Family]_{class}_Caudoviricetes	[Novel_Genus]_{class}_Caudoviricetes	Viruses	1	dsDNAphage	1	3	classified	VC48810	FALSE	TRUE	virulent
ma2024imeta	contig005845	contig005845	Duplodnaviria	Heunggongvirae	Uroviricota	Caudoviricetes	[Novel_Order]_{class}_Caudoviricetes	[Novel_Family]_{class}_Caudoviricetes	[Novel_Genus]_{class}_Caudoviricetes	Viruses	0.993	dsDNAphage	1	1	classified	VC08398	FALSE	TRUE	virulent
ma2024imeta	contig005847	contig005847	Duplodnaviria	Heunggongvirae	Uroviricota	Caudoviricetes	[Novel_Order]_{class}_Caudoviricetes	[Novel_Family]_{class}_Caudoviricetes	[Novel_Genus]_{class}_Caudoviricetes	Viruses	0.993	dsDNAphage	1	1	classified	VC61952	FALSE	TRUE	virulent
ma2024imeta	contig005852	contig005852	Duplodnaviria	Heunggongvirae	Uroviricota	Caudoviricetes	[Novel_Order]_{class}_Caudoviricetes	[Novel_Family]_{class}_Caudoviricetes	[Novel_Genus]_{class}_Caudoviricetes	Viruses	0.987	dsDNAphage	1	3	classified	VC35266	FALSE	TRUE	temperate
ma2024imeta	contig005854	contig005854	Duplodnaviria	Heunggongvirae	Uroviricota	Caudoviricetes	[Novel_Order]_{class}_Caudoviricetes	[Novel_Family]_{class}_Caudoviricetes	[Novel_Genus]_{class}_Caudoviricetes	Viruses	0.993	dsDNAphage	1	4	classified	VC62946	FALSE	TRUE	temperate
ma2024imeta	contig005880	contig005880	Duplodnaviria	Heunggongvirae	Uroviricota	Caudoviricetes	[Novel_Order]_{class}_Caudoviricetes	[Novel_Family]_{class}_Caudoviricetes	[Novel_Genus]_{class}_Caudoviricetes	Viruses	1	dsDNAphage	1	1	classified	VC19964	FALSE	TRUE	temperate
ma2024imeta	contig005883	contig005883	Duplodnaviria	Heunggongvirae	Uroviricota	Caudoviricetes	[Novel_Order]_{class}_Caudoviricetes	[Novel_Family]_{class}_Caudoviricetes	[Novel_Genus]_{class}_Caudoviricetes	Viruses	1	dsDNAphage	1	3	classified	VC40757	FALSE	TRUE	temperate
ma2024imeta	contig005913	contig005913	Duplodnaviria	Heunggongvirae	Uroviricota	Caudoviricetes	[Novel_Order]_{class}_Caudoviricetes	[Novel_Family]_{class}_Caudoviricetes	[Novel_Genus]_{class}_Caudoviricetes	Viruses	0.98	dsDNAphage	1	3	classified	VC61275	FALSE	TRUE	temperate
ma2024imeta	contig005934	contig005934	Duplodnaviria	Heunggongvirae	Uroviricota	Caudoviricetes	[Novel_Order]_{class}_Caudoviricetes	[Novel_Family]_{class}_Caudoviricetes	[Novel_Genus]_{class}_Caudoviricetes	Viruses	0.987	dsDNAphage	1	1	classified	VC69109	FALSE	TRUE	virulent
ma2024imeta	contig005974	contig005974	Duplodnaviria	Heunggongvirae	Uroviricota	Caudoviricetes	[Novel_Order]_{class}_Caudoviricetes	[Novel_Family]_{class}_Caudoviricetes	[Novel_Genus]_{class}_Caudoviricetes	Viruses	0.96	dsDNAphage	1	3	classified	VC40054	FALSE	TRUE	temperate
ma2024imeta	contig005984	contig005984	Duplodnaviria	Heunggongvirae	Uroviricota	Caudoviricetes	[Novel_Order]_{class}_Caudoviricetes	[Novel_Family]_{class}_Caudoviricetes	[Novel_Genus]_{class}_Caudoviricetes	Viruses	0.993	dsDNAphage	1	3	classified	VC20418	FALSE	TRUE	virulent
ma2024imeta	contig005994	contig005994	Duplodnaviria	Heunggongvirae	Uroviricota	Caudoviricetes	[Novel_Order]_{class}_Caudoviricetes	[Novel_Family]_{class}_Caudoviricetes	[Novel_Genus]_{class}_Caudoviricetes	Viruses	1	dsDNAphage	1	2	classified	VC46635	FALSE	TRUE	virulent
ma2024imeta	contig006055	contig006055	Duplodnaviria	Heunggongvirae	Uroviricota	Caudoviricetes	[Novel_Order]_{class}_Caudoviricetes	[Novel_Family]_{class}_Caudoviricetes	[Novel_Genus]_{class}_Caudoviricetes	Viruses	1	dsDNAphage	1	1	classified	VC70867	FALSE	TRUE	virulent
ma2024imeta	contig006166	contig006166	Duplodnaviria	Heunggongvirae	Uroviricota	Caudoviricetes	[Novel_Order]_{class}_Caudoviricetes	[Novel_Family]_{class}_Caudoviricetes	[Novel_Genus]_{class}_Caudoviricetes	Viruses	0.993	dsDNAphage	1	1	classified	VC24038	FALSE	TRUE	temperate
ma2024imeta	contig006182	contig006182	Duplodnaviria	Heunggongvirae	Uroviricota	Caudoviricetes	[Novel_Order]_{class}_Caudoviricetes	[Novel_Family]_{class}_Caudoviricetes	[Novel_Genus]_{class}_Caudoviricetes	Viruses	1	dsDNAphage	1	1	classified	VC15073	FALSE	TRUE	virulent
ma2024imeta	contig006185	contig006185	Duplodnaviria	Heunggongvirae	Uroviricota	Caudoviricetes	[Novel_Order]_{class}_Caudoviricetes	[Novel_Family]_{class}_Caudoviricetes	[Novel_Genus]_{class}_Caudoviricetes	Viruses	1	dsDNAphage	1	1	classified	VC62419	FALSE	TRUE	temperate
ma2024imeta	contig006187	contig006187	Duplodnaviria	Heunggongvirae	Uroviricota	Caudoviricetes	[Novel_Order]_{class}_Caudoviricetes	[Novel_Family]_{class}_Caudoviricetes	[Novel_Genus]_{class}_Caudoviricetes	Viruses	1	dsDNAphage	1	1	classified	VC25167	FALSE	TRUE	temperate
ma2024imeta	contig006190	contig006190	Duplodnaviria	Heunggongvirae	Uroviricota	Caudoviricetes	[Novel_Order]_{class}_Caudoviricetes	[Novel_Family]_{class}_Caudoviricetes	[Novel_Genus]_{class}_Caudoviricetes	Viruses	1	dsDNAphage	1	1	classified	VC42367	FALSE	TRUE	temperate
ma2024imeta	contig006194	contig054057	Duplodnaviria	Heunggongvirae	Uroviricota	Caudoviricetes	[Novel_Order]_{class}_Caudoviricetes	[Novel_Family]_{class}_Caudoviricetes	[Novel_Genus]_{class}_Caudoviricetes	Viruses	1	dsDNAphage	1	1	classified	VC16755	FALSE	TRUE	virulent
ma2024imeta	contig006196	contig006196	Duplodnaviria	Heunggongvirae	Uroviricota	Caudoviricetes	[Novel_Order]_{class}_Caudoviricetes	[Novel_Family]_{class}_Caudoviricetes	[Novel_Genus]_{class}_Caudoviricetes	Viruses	0.993	dsDNAphage	1	1	classified	VC27852	FALSE	TRUE	virulent
ma2024imeta	contig006222	contig006222	Duplodnaviria	Heunggongvirae	Uroviricota	Caudoviricetes	[Novel_Order]_{class}_Caudoviricetes	[Novel_Family]_{class}_Caudoviricetes	[Novel_Genus]_{class}_Caudoviricetes	Viruses	0.993	dsDNAphage	1	3	classified	VC10917	FALSE	TRUE	temperate
ma2024imeta	contig006281	contig006281	Duplodnaviria	Heunggongvirae	Uroviricota	Caudoviricetes	[Novel_Order]_{class}_Caudoviricetes	[Novel_Family]_{class}_Caudoviricetes	[Novel_Genus]_{class}_Caudoviricetes	Viruses	0.987	dsDNAphage	1	1	classified	VC61661	FALSE	TRUE	temperate
ma2024imeta	contig006298	contig006298	Duplodnaviria	Heunggongvirae	Uroviricota	Caudoviricetes	[Novel_Order]_{class}_Caudoviricetes	[Novel_Family]_{class}_Caudoviricetes	[Novel_Genus]_{class}_Caudoviricetes	Viruses	0.98	dsDNAphage	1	4	classified	VC61259	FALSE	TRUE	temperate
ma2024imeta	contig006358	contig006358	Duplodnaviria	Heunggongvirae	Uroviricota	Caudoviricetes	[Novel_Order]_{class}_Caudoviricetes	[Novel_Family]_{class}_Caudoviricetes	[Novel_Genus]_{class}_Caudoviricetes	Viruses	0.993	dsDNAphage	1	1	classified	VC60212	FALSE	TRUE	temperate
ma2024imeta	contig006416	contig006416	Duplodnaviria	Heunggongvirae	Uroviricota	Caudoviricetes	[Novel_Order]_{class}_Caudoviricetes	[Novel_Family]_{class}_Caudoviricetes	[Novel_Genus]_{class}_Caudoviricetes	Viruses	0.993	dsDNAphage	1	2	classified	VC27143	FALSE	TRUE	virulent
ma2024imeta	contig006425	contig006425	Duplodnaviria	Heunggongvirae	Uroviricota	Caudoviricetes	[Novel_Order]_{class}_Caudoviricetes	[Novel_Family]_{class}_Caudoviricetes	[Novel_Genus]_{class}_Caudoviricetes	Viruses	0.98	dsDNAphage	1	1	classified	VC24871	FALSE	TRUE	temperate
ma2024imeta	contig006426	contig235820	Duplodnaviria	Heunggongvirae	Uroviricota	Caudoviricetes	[Novel_Order]_{class}_Caudoviricetes	[Novel_Family]_{class}_Caudoviricetes	[Novel_Genus]_{class}_Caudoviricetes	Viruses	1	dsDNAphage	1	2	classified	VC33284	FALSE	TRUE	temperate
ma2024imeta	contig006436	contig006436	Duplodnaviria	Heunggongvirae	Uroviricota	Caudoviricetes	[Novel_Order]_{class}_Caudoviricetes	[Novel_Family]_{class}_Caudoviricetes	[Novel_Genus]_{class}_Caudoviricetes	Viruses	0.993	dsDNAphage	1	1	classified	VC60138	FALSE	TRUE	temperate
ma2024imeta	contig006437	contig006437	Duplodnaviria	Heunggongvirae	Uroviricota	Caudoviricetes	[Novel_Order]_{class}_Caudoviricetes	[Novel_Family]_{class}_Caudoviricetes	[Novel_Genus]_{class}_Caudoviricetes	Viruses	0.98	dsDNAphage	1	1	classified	VC15635	FALSE	TRUE	virulent
ma2024imeta	contig006441	contig006441	Duplodnaviria	Heunggongvirae	Uroviricota	Caudoviricetes	[Novel_Order]_{class}_Caudoviricetes	[Novel_Family]_{class}_Caudoviricetes	[Novel_Genus]_{class}_Caudoviricetes	Viruses	0.98	dsDNAphage	1	1	classified	VC44870	FALSE	TRUE	temperate
ma2024imeta	contig006442	contig006442	Duplodnaviria	Heunggongvirae	Uroviricota	Caudoviricetes	[Novel_Order]_{class}_Caudoviricetes	[Novel_Family]_{class}_Caudoviricetes	[Novel_Genus]_{class}_Caudoviricetes	Viruses	1	dsDNAphage	1	1	classified	VC46977	FALSE	TRUE	virulent
ma2024imeta	contig006449	contig006449	Monodnaviria	Sangervirae	Phixviricota	Malgrandaviricetes	Petitvirales	Microviridae	[Novel_Genus]_{family}_Microviridae	Viruses	1	dsDNAphage	1	1	unclassified	VC77587	FALSE	FALSE	virulent
ma2024imeta	contig006450	contig006450	Monodnaviria	Sangervirae	Phixviricota	Malgrandaviricetes	Petitvirales	Microviridae	[Novel_Genus]_{family}_Microviridae	Viruses	0.993	dsDNAphage	1	1	classified	VC18369	FALSE	TRUE	virulent
ma2024imeta	contig006470	contig006470	Duplodnaviria	Heunggongvirae	Uroviricota	Caudoviricetes	[Novel_Order]_{class}_Caudoviricetes	[Novel_Family]_{class}_Caudoviricetes	[Novel_Genus]_{class}_Caudoviricetes	Viruses	0.96	dsDNAphage	1	1	classified	VC57784	FALSE	TRUE	temperate
ma2024imeta	contig006482	contig006482	Duplodnaviria	Heunggongvirae	Uroviricota	Caudoviricetes	[Novel_Order]_{class}_Caudoviricetes	[Novel_Family]_{class}_Caudoviricetes	[Novel_Genus]_{class}_Caudoviricetes	Viruses	0.993	dsDNAphage	1	1	classified	VC23737	FALSE	TRUE	virulent
ma2024imeta	contig006522	contig006522	Duplodnaviria	Heunggongvirae	Uroviricota	Caudoviricetes	[Novel_Order]_{class}_Caudoviricetes	[Novel_Family]_{class}_Caudoviricetes	[Novel_Genus]_{class}_Caudoviricetes	Viruses	1	dsDNAphage	1	3	classified	VC50661	FALSE	TRUE	temperate
ma2024imeta	contig006628	contig006628	Duplodnaviria	Heunggongvirae	Uroviricota	Caudoviricetes	[Novel_Order]_{class}_Caudoviricetes	[Novel_Family]_{class}_Caudoviricetes	[Novel_Genus]_{class}_Caudoviricetes	Viruses	1	dsDNAphage	1	3	classified	VC63024	FALSE	TRUE	temperate
ma2024imeta	contig006657	contig006657	Duplodnaviria	Heunggongvirae	Uroviricota	Caudoviricetes	[Novel_Order]_{class}_Caudoviricetes	[Novel_Family]_{class}_Caudoviricetes	[Novel_Genus]_{class}_Caudoviricetes	Viruses	1	dsDNAphage	1	3	classified	VC61388	FALSE	TRUE	temperate
ma2024imeta	contig006719	contig006719	Duplodnaviria	Heunggongvirae	Uroviricota	Caudoviricetes	[Novel_Order]_{class}_Caudoviricetes	[Novel_Family]_{class}_Caudoviricetes	[Novel_Genus]_{class}_Caudoviricetes	Viruses	0.993	dsDNAphage	1	1	classified	VC64945	FALSE	TRUE	virulent
ma2024imeta	contig006720	contig006720	Duplodnaviria	Heunggongvirae	Uroviricota	Caudoviricetes	[Novel_Order]_{class}_Caudoviricetes	[Novel_Family]_{class}_Caudoviricetes	[Novel_Genus]_{class}_Caudoviricetes	Viruses	1	dsDNAphage	1	1	classified	VC65243	FALSE	TRUE	temperate
ma2024imeta	contig006721	contig006721	Duplodnaviria	Heunggongvirae	Uroviricota	Caudoviricetes	[Novel_Order]_{class}_Caudoviricetes	[Novel_Family]_{class}_Caudoviricetes	[Novel_Genus]_{class}_Caudoviricetes	Viruses	1	dsDNAphage	1	1	classified	VC02485	FALSE	TRUE	temperate
ma2024imeta	contig006727	contig006727	Duplodnaviria	Heunggongvirae	Uroviricota	Caudoviricetes	[Novel_Order]_{class}_Caudoviricetes	[Novel_Family]_{class}_Caudoviricetes	[Novel_Genus]_{class}_Caudoviricetes	Viruses	1	dsDNAphage	1	4	classified	VC38030	FALSE	TRUE	temperate
ma2024imeta	contig006799	contig006799	Duplodnaviria	Heunggongvirae	Uroviricota	Caudoviricetes	[Novel_Order]_{class}_Caudoviricetes	[Novel_Family]_{class}_Caudoviricetes	[Novel_Genus]_{class}_Caudoviricetes	Viruses	1	dsDNAphage	1	1	classified	VC70686	FALSE	TRUE	temperate
ma2024imeta	contig006865	contig006865	Duplodnaviria	Heunggongvirae	Uroviricota	Caudoviricetes	[Novel_Order]_{class}_Caudoviricetes	[Novel_Family]_{class}_Caudoviricetes	[Novel_Genus]_{class}_Caudoviricetes	Viruses	0.993	dsDNAphage	1	3	classified	VC01414	FALSE	TRUE	temperate
ma2024imeta	contig006875	contig006875	Duplodnaviria	Heunggongvirae	Uroviricota	Caudoviricetes	[Novel_Order]_{class}_Caudoviricetes	[Novel_Family]_{class}_Caudoviricetes	[Novel_Genus]_{class}_Caudoviricetes	Viruses	1	dsDNAphage	1	1	classified	VC62416	FALSE	TRUE	temperate
ma2024imeta	contig006902	contig006902	Duplodnaviria	Heunggongvirae	Uroviricota	Caudoviricetes	[Novel_Order]_{class}_Caudoviricetes	[Novel_Family]_{class}_Caudoviricetes	[Novel_Genus]_{class}_Caudoviricetes	Viruses	0.993	dsDNAphage	1	3	classified	VC63576	FALSE	TRUE	temperate
ma2024imeta	contig006944	contig006944	Duplodnaviria	Heunggongvirae	Uroviricota	Caudoviricetes	[Novel_Order]_{class}_Caudoviricetes	[Novel_Family]_{class}_Caudoviricetes	[Novel_Genus]_{class}_Caudoviricetes	Viruses	1	dsDNAphage	1	1	classified	VC46916	FALSE	TRUE	virulent
ma2024imeta	contig006950	contig006950	Duplodnaviria	Heunggongvirae	Uroviricota	Caudoviricetes	[Novel_Order]_{class}_Caudoviricetes	[Novel_Family]_{class}_Caudoviricetes	[Novel_Genus]_{class}_Caudoviricetes	Viruses	0.973	dsDNAphage	1	1	classified	VC08407	FALSE	TRUE	virulent
ma2024imeta	contig006953	contig006953	Duplodnaviria	Heunggongvirae	Uroviricota	Caudoviricetes	[Novel_Order]_{class}_Caudoviricetes	[Novel_Family]_{class}_Caudoviricetes	[Novel_Genus]_{class}_Caudoviricetes	Viruses	1	dsDNAphage	1	1	classified	VC16752	FALSE	TRUE	virulent
ma2024imeta	contig006955	contig006955	Duplodnaviria	Heunggongvirae	Uroviricota	Caudoviricetes	[Novel_Order]_{class}_Caudoviricetes	[Novel_Family]_{class}_Caudoviricetes	[Novel_Genus]_{class}_Caudoviricetes	Viruses	0.993	dsDNAphage	1	1	classified	VC02489	FALSE	TRUE	temperate
ma2024imeta	contig006956	contig006956	Duplodnaviria	Heunggongvirae	Uroviricota	Caudoviricetes	[Novel_Order]_{class}_Caudoviricetes	[Novel_Family]_{class}_Caudoviricetes	[Novel_Genus]_{class}_Caudoviricetes	Viruses	1	dsDNAphage	1	1	classified	VC33284	FALSE	TRUE	virulent
ma2024imeta	contig006962	contig006962	Duplodnaviria	Heunggongvirae	Uroviricota	Caudoviricetes	[Novel_Order]_{class}_Caudoviricetes	[Novel_Family]_{class}_Caudoviricetes	[Novel_Genus]_{class}_Caudoviricetes	Viruses	1	dsDNAphage	1	3	classified	VC31598	FALSE	TRUE	temperate
ma2024imeta	contig006998	contig006998	Duplodnaviria	Heunggongvirae	Uroviricota	Caudoviricetes	[Novel_Order]_{class}_Caudoviricetes	[Novel_Family]_{class}_Caudoviricetes	[Novel_Genus]_{class}_Caudoviricetes	Viruses	0.993	dsDNAphage	1	4	classified	VC62904	FALSE	TRUE	temperate
ma2024imeta	contig007010	contig007010	Duplodnaviria	Heunggongvirae	Uroviricota	Caudoviricetes	[Novel_Order]_{class}_Caudoviricetes	[Novel_Family]_{class}_Caudoviricetes	[Novel_Genus]_{class}_Caudoviricetes	Viruses	0.993	dsDNAphage	1	1	classified	VC02568	FALSE	TRUE	temperate
ma2024imeta	contig007016	contig007016	Duplodnaviria	Heunggongvirae	Uroviricota	Caudoviricetes	[Novel_Order]_{class}_Caudoviricetes	[Novel_Family]_{class}_Caudoviricetes	[Novel_Genus]_{class}_Caudoviricetes	Viruses	0.98	dsDNAphage	1	1	classified	VC63180	FALSE	TRUE	temperate
ma2024imeta	contig007023	contig007023	Duplodnaviria	Heunggongvirae	Uroviricota	Caudoviricetes	[Novel_Order]_{class}_Caudoviricetes	[Novel_Family]_{class}_Caudoviricetes	[Novel_Genus]_{class}_Caudoviricetes	Viruses	1	dsDNAphage	1	1	classified	VC02422	FALSE	TRUE	temperate
ma2024imeta	contig007051	contig007051	Duplodnaviria	Heunggongvirae	Uroviricota	Caudoviricetes	[Novel_Order]_{class}_Caudoviricetes	[Novel_Family]_{class}_Caudoviricetes	[Novel_Genus]_{class}_Caudoviricetes	Viruses	1	dsDNAphage	1	1	classified	VC47800	FALSE	TRUE	temperate
ma2024imeta	contig007098	contig137202	Duplodnaviria	Heunggongvirae	Uroviricota	Caudoviricetes	[Novel_Order]_{class}_Caudoviricetes	[Novel_Family]_{class}_Caudoviricetes	[Novel_Genus]_{class}_Caudoviricetes	Viruses	1	dsDNAphage	1	2	classified	VC71246	FALSE	TRUE	temperate
ma2024imeta	contig007115	contig007115	Duplodnaviria	Heunggongvirae	Uroviricota	Caudoviricetes	[Novel_Order]_{class}_Caudoviricetes	[Novel_Family]_{class}_Caudoviricetes	[Novel_Genus]_{class}_Caudoviricetes	Viruses	0.94	dsDNAphage	1	1	classified	VC07477	FALSE	TRUE	virulent
ma2024imeta	contig007124	contig007124	Duplodnaviria	Heunggongvirae	Uroviricota	Caudoviricetes	[Novel_Order]_{class}_Caudoviricetes	[Novel_Family]_{class}_Caudoviricetes	[Novel_Genus]_{class}_Caudoviricetes	Viruses	1	dsDNAphage	1	2	classified	VC31667	FALSE	TRUE	temperate
ma2024imeta	contig007145	contig007145	Duplodnaviria	Heunggongvirae	Uroviricota	Caudoviricetes	[Novel_Order]_{class}_Caudoviricetes	[Novel_Family]_{class}_Caudoviricetes	[Novel_Genus]_{class}_Caudoviricetes	Viruses	0.993	dsDNAphage	1	1	classified	VC28872	FALSE	TRUE	temperate
ma2024imeta	contig007163	contig007163	Monodnaviria	Sangervirae	Phixviricota	Malgrandaviricetes	Petitvirales	Microviridae	[Novel_Genus]_{family}_Microviridae	Viruses	0.993	dsDNAphage	1	4	classified	VC18332	FALSE	TRUE	virulent
ma2024imeta	contig007189	contig007189	Duplodnaviria	Heunggongvirae	Uroviricota	Caudoviricetes	[Novel_Order]_{class}_Caudoviricetes	[Novel_Family]_{class}_Caudoviricetes	[Novel_Genus]_{class}_Caudoviricetes	Viruses	1	dsDNAphage	1	1	classified	VC20023	FALSE	TRUE	temperate
ma2024imeta	contig007192	contig007192	Duplodnaviria	Heunggongvirae	Uroviricota	Caudoviricetes	[Novel_Order]_{class}_Caudoviricetes	[Novel_Family]_{class}_Caudoviricetes	[Novel_Genus]_{class}_Caudoviricetes	Viruses	1	dsDNAphage	1	1	classified	VC37423	FALSE	TRUE	virulent
ma2024imeta	contig007193	contig007193	Duplodnaviria	Heunggongvirae	Uroviricota	Caudoviricetes	[Novel_Order]_{class}_Caudoviricetes	[Novel_Family]_{class}_Caudoviricetes	[Novel_Genus]_{class}_Caudoviricetes	Viruses	0.993	dsDNAphage	1	1	classified	VC32869	FALSE	TRUE	temperate
ma2024imeta	contig007197	contig007197	Duplodnaviria	Heunggongvirae	Uroviricota	Caudoviricetes	[Novel_Order]_{class}_Caudoviricetes	[Novel_Family]_{class}_Caudoviricetes	[Novel_Genus]_{class}_Caudoviricetes	Viruses	0.973	dsDNAphage	1	1	classified	VC57112	FALSE	TRUE	temperate
ma2024imeta	contig007200	contig007200	Duplodnaviria	Heunggongvirae	Uroviricota	Caudoviricetes	[Novel_Order]_{class}_Caudoviricetes	[Novel_Family]_{class}_Caudoviricetes	[Novel_Genus]_{class}_Caudoviricetes	Viruses	0.98	dsDNAphage	1	1	classified	VC44873	FALSE	TRUE	virulent
ma2024imeta	contig007201	contig007201	Monodnaviria	Sangervirae	Phixviricota	Malgrandaviricetes	Petitvirales	Microviridae	[Novel_Genus]_{family}_Microviridae	Viruses	1	dsDNAphage	1	1	unclassified	VC77588	FALSE	FALSE	virulent
ma2024imeta	contig007204	contig007204	Monodnaviria	Sangervirae	Phixviricota	Malgrandaviricetes	Petitvirales	Microviridae	[Novel_Genus]_{family}_Microviridae	Viruses	1	dsDNAphage	1	1	classified	VC02449	FALSE	TRUE	virulent
ma2024imeta	contig007284	contig265719	Duplodnaviria	Heunggongvirae	Uroviricota	Caudoviricetes	[Novel_Order]_{class}_Caudoviricetes	[Novel_Family]_{class}_Caudoviricetes	[Novel_Genus]_{class}_Caudoviricetes	Viruses	1	dsDNAphage	1	1	classified	VC41277	FALSE	TRUE	temperate
ma2024imeta	contig007306	contig049806	Duplodnaviria	Heunggongvirae	Uroviricota	Caudoviricetes	[Novel_Order]_{class}_Caudoviricetes	[Novel_Family]_{class}_Caudoviricetes	[Novel_Genus]_{class}_Caudoviricetes	Viruses	1	dsDNAphage	1	3	classified	VC61375	FALSE	TRUE	temperate
ma2024imeta	contig007310	contig007310	Duplodnaviria	Heunggongvirae	Uroviricota	Caudoviricetes	[Novel_Order]_{class}_Caudoviricetes	[Novel_Family]_{class}_Caudoviricetes	[Novel_Genus]_{class}_Caudoviricetes	Viruses	0.993	dsDNAphage	1	1	classified	VC29669	FALSE	TRUE	virulent
ma2024imeta	contig007316	contig007316	Duplodnaviria	Heunggongvirae	Uroviricota	Caudoviricetes	[Novel_Order]_{class}_Caudoviricetes	[Novel_Family]_{class}_Caudoviricetes	[Novel_Genus]_{class}_Caudoviricetes	Viruses	1	dsDNAphage	1	1	classified	VC02582	FALSE	TRUE	temperate
ma2024imeta	contig007322	contig007322	Duplodnaviria	Heunggongvirae	Uroviricota	Caudoviricetes	[Novel_Order]_{class}_Caudoviricetes	[Novel_Family]_{class}_Caudoviricetes	[Novel_Genus]_{class}_Caudoviricetes	Viruses	0.993	dsDNAphage	1	2	classified	VC46012	FALSE	TRUE	virulent
ma2024imeta	contig007328	contig007328	Duplodnaviria	Heunggongvirae	Uroviricota	Caudoviricetes	[Novel_Order]_{class}_Caudoviricetes	[Novel_Family]_{class}_Caudoviricetes	[Novel_Genus]_{class}_Caudoviricetes	Viruses	0.993	dsDNAphage	1	1	classified	VC23748	FALSE	TRUE	temperate
ma2024imeta	contig007352	contig007352	Duplodnaviria	Heunggongvirae	Uroviricota	Caudoviricetes	[Novel_Order]_{class}_Caudoviricetes	[Novel_Family]_{class}_Caudoviricetes	[Novel_Genus]_{class}_Caudoviricetes	Viruses	0.987	dsDNAphage	1	3	classified	VC20076	FALSE	TRUE	temperate
ma2024imeta	contig007416	contig007416	Duplodnaviria	Heunggongvirae	Uroviricota	Caudoviricetes	[Novel_Order]_{class}_Caudoviricetes	[Novel_Family]_{class}_Caudoviricetes	[Novel_Genus]_{class}_Caudoviricetes	Viruses	1	dsDNAphage	1	1	classified	VC20708	FALSE	TRUE	virulent
ma2024imeta	contig007418	contig203250	Duplodnaviria	Heunggongvirae	Uroviricota	Caudoviricetes	[Novel_Order]_{class}_Caudoviricetes	[Novel_Family]_{class}_Caudoviricetes	[Novel_Genus]_{class}_Caudoviricetes	Viruses	1	dsDNAphage	1	1	classified	VC61449	FALSE	TRUE	temperate
ma2024imeta	contig007419	contig007419	Duplodnaviria	Heunggongvirae	Uroviricota	Caudoviricetes	[Novel_Order]_{class}_Caudoviricetes	[Novel_Family]_{class}_Caudoviricetes	[Novel_Genus]_{class}_Caudoviricetes	Viruses	0.993	dsDNAphage	1	1	classified	VC27687	FALSE	TRUE	virulent
ma2024imeta	contig007421	contig007421	Duplodnaviria	Heunggongvirae	Uroviricota	Caudoviricetes	[Novel_Order]_{class}_Caudoviricetes	[Novel_Family]_{class}_Caudoviricetes	[Novel_Genus]_{class}_Caudoviricetes	Viruses	1	dsDNAphage	1	1	classified	VC25708	FALSE	TRUE	virulent
ma2024imeta	contig007422	contig007422	Monodnaviria	Sangervirae	Phixviricota	Malgrandaviricetes	Petitvirales	Microviridae	[Novel_Genus]_{family}_Microviridae	Viruses	0.987	dsDNAphage	1	1	unclassified	VC77589	FALSE	FALSE	virulent
ma2024imeta	contig007425	contig007425	Duplodnaviria	Heunggongvirae	Uroviricota	Caudoviricetes	[Novel_Order]_{class}_Caudoviricetes	[Novel_Family]_{class}_Caudoviricetes	[Novel_Genus]_{class}_Caudoviricetes	Viruses	1	dsDNAphage	1	1	classified	VC29952	FALSE	TRUE	virulent
ma2024imeta	contig007430	contig007430	Duplodnaviria	Heunggongvirae	Uroviricota	Caudoviricetes	[Novel_Order]_{class}_Caudoviricetes	[Novel_Family]_{class}_Caudoviricetes	[Novel_Genus]_{class}_Caudoviricetes	Viruses	1	dsDNAphage	1	1	classified	VC27568	FALSE	TRUE	virulent
ma2024imeta	contig007497	contig007497	Duplodnaviria	Heunggongvirae	Uroviricota	Caudoviricetes	[Novel_Order]_{class}_Caudoviricetes	[Novel_Family]_{class}_Caudoviricetes	[Novel_Genus]_{class}_Caudoviricetes	Viruses	0.98	dsDNAphage	1	4	classified	VC27174	FALSE	TRUE	virulent
ma2024imeta	contig007531	contig007531	Duplodnaviria	Heunggongvirae	Uroviricota	Caudoviricetes	[Novel_Order]_{class}_Caudoviricetes	[Novel_Family]_{class}_Caudoviricetes	[Novel_Genus]_{class}_Caudoviricetes	Viruses	0.993	dsDNAphage	1	1	classified	VC29362	FALSE	TRUE	virulent
ma2024imeta	contig007576	contig007576	Duplodnaviria	Heunggongvirae	Uroviricota	Caudoviricetes	[Novel_Order]_{class}_Caudoviricetes	[Novel_Family]_{class}_Caudoviricetes	[Novel_Genus]_{class}_Caudoviricetes	Viruses	1	dsDNAphage	1	3	classified	VC30239	FALSE	TRUE	virulent
ma2024imeta	contig007580	contig007580	Duplodnaviria	Heunggongvirae	Uroviricota	Caudoviricetes	[Novel_Order]_{class}_Caudoviricetes	[Novel_Family]_{class}_Caudoviricetes	[Novel_Genus]_{class}_Caudoviricetes	Viruses	1	dsDNAphage	1	1	classified	VC48534	FALSE	TRUE	temperate
ma2024imeta	contig007597	contig007597	Duplodnaviria	Heunggongvirae	Uroviricota	Caudoviricetes	[Novel_Order]_{class}_Caudoviricetes	[Novel_Family]_{class}_Caudoviricetes	[Novel_Genus]_{class}_Caudoviricetes	Viruses	1	dsDNAphage	1	1	classified	VC14741	FALSE	TRUE	virulent
ma2024imeta	contig007598	contig007598	Duplodnaviria	Heunggongvirae	Uroviricota	Caudoviricetes	[Novel_Order]_{class}_Caudoviricetes	[Novel_Family]_{class}_Caudoviricetes	[Novel_Genus]_{class}_Caudoviricetes	Viruses	0.987	dsDNAphage	1	1	classified	VC30194	FALSE	TRUE	temperate
ma2024imeta	contig007601	contig007601	Duplodnaviria	Heunggongvirae	Uroviricota	Caudoviricetes	[Novel_Order]_{class}_Caudoviricetes	[Novel_Family]_{class}_Caudoviricetes	[Novel_Genus]_{class}_Caudoviricetes	Viruses	1	dsDNAphage	1	1	classified	VC46012	FALSE	TRUE	virulent
ma2024imeta	contig007606	contig007606	Duplodnaviria	Heunggongvirae	Uroviricota	Caudoviricetes	[Novel_Order]_{class}_Caudoviricetes	[Novel_Family]_{class}_Caudoviricetes	[Novel_Genus]_{class}_Caudoviricetes	Viruses	0.993	dsDNAphage	1	1	classified	VC34296	FALSE	TRUE	temperate
ma2024imeta	contig007610	contig007610	Duplodnaviria	Heunggongvirae	Uroviricota	Caudoviricetes	[Novel_Order]_{class}_Caudoviricetes	[Novel_Family]_{class}_Caudoviricetes	[Novel_Genus]_{class}_Caudoviricetes	Viruses	1	dsDNAphage	1	1	classified	VC20091	FALSE	TRUE	temperate
ma2024imeta	contig007611	contig007611	Duplodnaviria	Heunggongvirae	Uroviricota	Caudoviricetes	[Novel_Order]_{class}_Caudoviricetes	[Novel_Family]_{class}_Caudoviricetes	[Novel_Genus]_{class}_Caudoviricetes	Viruses	0.993	dsDNAphage	1	1	classified	VC57062	FALSE	TRUE	temperate
ma2024imeta	contig007642	contig007642	Duplodnaviria	Heunggongvirae	Uroviricota	Caudoviricetes	[Novel_Order]_{class}_Caudoviricetes	[Novel_Family]_{class}_Caudoviricetes	[Novel_Genus]_{class}_Caudoviricetes	Viruses	1	dsDNAphage	1	4	classified	VC37990	FALSE	TRUE	temperate
ma2024imeta	contig007879	contig019993	Duplodnaviria	Heunggongvirae	Uroviricota	Caudoviricetes	Crassvirales	[Novel_Family]_{order}_Crassvirales	[Novel_Genus]_{order}_Crassvirales	Viruses	1	dsDNAphage	1	3	classified	VC00285	TRUE	FALSE	virulent
ma2024imeta	contig007940	contig007940	Duplodnaviria	Heunggongvirae	Uroviricota	Caudoviricetes	[Novel_Order]_{class}_Caudoviricetes	[Novel_Family]_{class}_Caudoviricetes	[Novel_Genus]_{class}_Caudoviricetes	Viruses	0.993	dsDNAphage	1	1	classified	VC01117	FALSE	TRUE	temperate
ma2024imeta	contig007953	contig100205	Duplodnaviria	Heunggongvirae	Uroviricota	Caudoviricetes	[Novel_Order]_{class}_Caudoviricetes	[Novel_Family]_{class}_Caudoviricetes	[Novel_Genus]_{class}_Caudoviricetes	Viruses	0.973	dsDNAphage	1	1	classified	VC45000	FALSE	TRUE	temperate
ma2024imeta	contig007963	contig031487	Duplodnaviria	Heunggongvirae	Uroviricota	Caudoviricetes	[Novel_Order]_{class}_Caudoviricetes	[Novel_Family]_{class}_Caudoviricetes	[Novel_Genus]_{class}_Caudoviricetes	Viruses	0.993	dsDNAphage	1	2	classified	VC11415	FALSE	TRUE	temperate
ma2024imeta	contig007969	contig007969	Duplodnaviria	Heunggongvirae	Uroviricota	Caudoviricetes	[Novel_Order]_{class}_Caudoviricetes	[Novel_Family]_{class}_Caudoviricetes	[Novel_Genus]_{class}_Caudoviricetes	Viruses	0.967	dsDNAphage	1	3	classified	VC64284	FALSE	TRUE	virulent
ma2024imeta	contig007978	contig007978	Duplodnaviria	Heunggongvirae	Uroviricota	Caudoviricetes	[Novel_Order]_{class}_Caudoviricetes	[Novel_Family]_{class}_Caudoviricetes	[Novel_Genus]_{class}_Caudoviricetes	Viruses	1	dsDNAphage	1	3	classified	VC15695	FALSE	TRUE	virulent
ma2024imeta	contig008014	contig008014	Duplodnaviria	Heunggongvirae	Uroviricota	Caudoviricetes	[Novel_Order]_{class}_Caudoviricetes	[Novel_Family]_{class}_Caudoviricetes	[Novel_Genus]_{class}_Caudoviricetes	Viruses	1	dsDNAphage	1	3	classified	VC40911	FALSE	TRUE	temperate
ma2024imeta	contig008110	contig008110	Duplodnaviria	Heunggongvirae	Uroviricota	Caudoviricetes	[Novel_Order]_{class}_Caudoviricetes	[Novel_Family]_{class}_Caudoviricetes	[Novel_Genus]_{class}_Caudoviricetes	Viruses	1	dsDNAphage	1	1	classified	VC62057	FALSE	TRUE	virulent
ma2024imeta	contig008112	contig258994	Duplodnaviria	Heunggongvirae	Uroviricota	Caudoviricetes	[Novel_Order]_{class}_Caudoviricetes	[Novel_Family]_{class}_Caudoviricetes	[Novel_Genus]_{class}_Caudoviricetes	Viruses	1	dsDNAphage	1	1	classified	VC70530	FALSE	TRUE	virulent
ma2024imeta	contig008130	contig066333	Duplodnaviria	Heunggongvirae	Uroviricota	Caudoviricetes	[Novel_Order]_{class}_Caudoviricetes	[Novel_Family]_{class}_Caudoviricetes	[Novel_Genus]_{class}_Caudoviricetes	Viruses	1	dsDNAphage	1	2	classified	VC58024	FALSE	TRUE	virulent
ma2024imeta	contig008313	contig008313	Duplodnaviria	Heunggongvirae	Uroviricota	Caudoviricetes	[Novel_Order]_{class}_Caudoviricetes	[Novel_Family]_{class}_Caudoviricetes	[Novel_Genus]_{class}_Caudoviricetes	Viruses	0.973	dsDNAphage	1	2	classified	VC16369	FALSE	TRUE	virulent
ma2024imeta	contig008413	contig008413	Duplodnaviria	Heunggongvirae	Uroviricota	Caudoviricetes	[Novel_Order]_{class}_Caudoviricetes	[Novel_Family]_{class}_Caudoviricetes	[Novel_Genus]_{class}_Caudoviricetes	Viruses	0.967	dsDNAphage	1	3	classified	VC23521	FALSE	TRUE	temperate
ma2024imeta	contig008433	contig008433	Duplodnaviria	Heunggongvirae	Uroviricota	Caudoviricetes	[Novel_Order]_{class}_Caudoviricetes	[Novel_Family]_{class}_Caudoviricetes	[Novel_Genus]_{class}_Caudoviricetes	Viruses	1	dsDNAphage	1	1	classified	VC72233	TRUE	FALSE	virulent
ma2024imeta	contig008483	contig008483	Duplodnaviria	Heunggongvirae	Uroviricota	Caudoviricetes	[Novel_Order]_{class}_Caudoviricetes	[Novel_Family]_{class}_Caudoviricetes	[Novel_Genus]_{class}_Caudoviricetes	Viruses	1	dsDNAphage	1	1	classified	VC26451	FALSE	TRUE	temperate
ma2024imeta	contig008494	contig008494	Duplodnaviria	Heunggongvirae	Uroviricota	Caudoviricetes	[Novel_Order]_{class}_Caudoviricetes	[Novel_Family]_{class}_Caudoviricetes	[Novel_Genus]_{class}_Caudoviricetes	Viruses	1	dsDNAphage	1	1	classified	VC40751	FALSE	TRUE	temperate
ma2024imeta	contig008566	contig031220	Monodnaviria	Sangervirae	Phixviricota	Malgrandaviricetes	Petitvirales	Microviridae	[Novel_Genus]_{family}_Microviridae	Viruses	1	dsDNAphage	1	4	classified	VC18355	FALSE	TRUE	virulent
ma2024imeta	contig008569	contig008569	Duplodnaviria	Heunggongvirae	Uroviricota	Caudoviricetes	[Novel_Order]_{class}_Caudoviricetes	[Novel_Family]_{class}_Caudoviricetes	[Novel_Genus]_{class}_Caudoviricetes	Viruses	0.993	dsDNAphage	1	1	classified	VC63255	FALSE	TRUE	temperate
ma2024imeta	contig008655	contig008655	Duplodnaviria	Heunggongvirae	Uroviricota	Caudoviricetes	[Novel_Order]_{class}_Caudoviricetes	[Novel_Family]_{class}_Caudoviricetes	[Novel_Genus]_{class}_Caudoviricetes	Viruses	0.987	dsDNAphage	1	1	classified	VC29667	FALSE	TRUE	temperate
ma2024imeta	contig008659	contig133243	Duplodnaviria	Heunggongvirae	Uroviricota	Caudoviricetes	[Novel_Order]_{class}_Caudoviricetes	[Novel_Family]_{class}_Caudoviricetes	[Novel_Genus]_{class}_Caudoviricetes	Viruses	0.987	dsDNAphage	1	4	classified	VC63546	FALSE	TRUE	temperate
ma2024imeta	contig008726	contig008726	Duplodnaviria	Heunggongvirae	Uroviricota	Caudoviricetes	[Novel_Order]_{class}_Caudoviricetes	[Novel_Family]_{class}_Caudoviricetes	[Novel_Genus]_{class}_Caudoviricetes	Viruses	0.987	dsDNAphage	1	4	classified	VC38116	FALSE	TRUE	temperate
ma2024imeta	contig008748	contig008748	Duplodnaviria	Heunggongvirae	Uroviricota	Caudoviricetes	[Novel_Order]_{class}_Caudoviricetes	[Novel_Family]_{class}_Caudoviricetes	[Novel_Genus]_{class}_Caudoviricetes	Viruses	1	dsDNAphage	1	1	classified	VC69182	FALSE	TRUE	virulent
ma2024imeta	contig008773	contig008773	Duplodnaviria	Heunggongvirae	Uroviricota	Caudoviricetes	[Novel_Order]_{class}_Caudoviricetes	[Novel_Family]_{class}_Caudoviricetes	[Novel_Genus]_{class}_Caudoviricetes	Viruses	1	dsDNAphage	1	1	classified	VC61260	FALSE	TRUE	temperate
ma2024imeta	contig008861	contig009266	Duplodnaviria	Heunggongvirae	Uroviricota	Caudoviricetes	[Novel_Order]_{class}_Caudoviricetes	[Novel_Family]_{class}_Caudoviricetes	[Novel_Genus]_{class}_Caudoviricetes	Viruses	1	dsDNAphage	1	1	classified	VC62998	FALSE	TRUE	temperate
ma2024imeta	contig008945	contig008945	Duplodnaviria	Heunggongvirae	Uroviricota	Caudoviricetes	[Novel_Order]_{class}_Caudoviricetes	[Novel_Family]_{class}_Caudoviricetes	[Novel_Genus]_{class}_Caudoviricetes	Viruses	1	dsDNAphage	1	1	classified	VC25319	FALSE	TRUE	temperate
ma2024imeta	contig008976	contig008976	Monodnaviria	Sangervirae	Phixviricota	Malgrandaviricetes	Petitvirales	Microviridae	[Novel_Genus]_{family}_Microviridae	Viruses	1	dsDNAphage	1	4	unclassified	VC78028	FALSE	FALSE	virulent
ma2024imeta	contig009058	contig009058	Duplodnaviria	Heunggongvirae	Uroviricota	Caudoviricetes	[Novel_Order]_{class}_Caudoviricetes	[Novel_Family]_{class}_Caudoviricetes	[Novel_Genus]_{class}_Caudoviricetes	Viruses	0.993	dsDNAphage	1	2	classified	VC49644	FALSE	TRUE	virulent
ma2024imeta	contig009137	contig009137	Duplodnaviria	Heunggongvirae	Uroviricota	Caudoviricetes	[Novel_Order]_{class}_Caudoviricetes	[Novel_Family]_{class}_Caudoviricetes	[Novel_Genus]_{class}_Caudoviricetes	Viruses	1	dsDNAphage	1	1	classified	VC61840	FALSE	TRUE	virulent
ma2024imeta	contig009269	contig009269	Duplodnaviria	Heunggongvirae	Uroviricota	Caudoviricetes	[Novel_Order]_{class}_Caudoviricetes	[Novel_Family]_{class}_Caudoviricetes	[Novel_Genus]_{class}_Caudoviricetes	Viruses	1	dsDNAphage	1	1	classified	VC70734	FALSE	TRUE	temperate
ma2024imeta	contig009441	contig009441	Duplodnaviria	Heunggongvirae	Uroviricota	Caudoviricetes	[Novel_Order]_{class}_Caudoviricetes	[Novel_Family]_{class}_Caudoviricetes	[Novel_Genus]_{class}_Caudoviricetes	Viruses	1	dsDNAphage	1	1	classified	VC14617	FALSE	TRUE	virulent
ma2024imeta	contig009577	contig009577	Duplodnaviria	Heunggongvirae	Uroviricota	Caudoviricetes	[Novel_Order]_{class}_Caudoviricetes	[Novel_Family]_{class}_Caudoviricetes	[Novel_Genus]_{class}_Caudoviricetes	Viruses	1	dsDNAphage	1	1	classified	VC46601	FALSE	TRUE	virulent
ma2024imeta	contig009595	contig289933	Duplodnaviria	Heunggongvirae	Uroviricota	Caudoviricetes	[Novel_Order]_{class}_Caudoviricetes	[Novel_Family]_{class}_Caudoviricetes	[Novel_Genus]_{class}_Caudoviricetes	Viruses	0.993	dsDNAphage	1	3	classified	VC28469	FALSE	TRUE	virulent
ma2024imeta	contig009732	contig009732	Duplodnaviria	Heunggongvirae	Uroviricota	Caudoviricetes	[Novel_Order]_{class}_Caudoviricetes	[Novel_Family]_{class}_Caudoviricetes	[Novel_Genus]_{class}_Caudoviricetes	Viruses	1	dsDNAphage	1	3	classified	VC04795	FALSE	TRUE	virulent
ma2024imeta	contig009749	contig009749	Duplodnaviria	Heunggongvirae	Uroviricota	Caudoviricetes	[Novel_Order]_{class}_Caudoviricetes	[Novel_Family]_{class}_Caudoviricetes	[Novel_Genus]_{class}_Caudoviricetes	Viruses	1	dsDNAphage	1	4	classified	VC37580	FALSE	TRUE	temperate
ma2024imeta	contig009788	contig009788	Duplodnaviria	Heunggongvirae	Uroviricota	Caudoviricetes	[Novel_Order]_{class}_Caudoviricetes	[Novel_Family]_{class}_Caudoviricetes	[Novel_Genus]_{class}_Caudoviricetes	Viruses	0.993	dsDNAphage	1	4	classified	VC70854	FALSE	TRUE	temperate
ma2024imeta	contig009802	contig009802	Duplodnaviria	Heunggongvirae	Uroviricota	Caudoviricetes	[Novel_Order]_{class}_Caudoviricetes	[Novel_Family]_{class}_Caudoviricetes	[Novel_Genus]_{class}_Caudoviricetes	Viruses	1	dsDNAphage	1	1	classified	VC43910	FALSE	TRUE	virulent
ma2024imeta	contig009811	contig009811	Duplodnaviria	Heunggongvirae	Uroviricota	Caudoviricetes	[Novel_Order]_{class}_Caudoviricetes	[Novel_Family]_{class}_Caudoviricetes	[Novel_Genus]_{class}_Caudoviricetes	Viruses	1	dsDNAphage	1	1	classified	VC67652	FALSE	TRUE	virulent
ma2024imeta	contig009914	contig009914	Duplodnaviria	Heunggongvirae	Uroviricota	Caudoviricetes	[Novel_Order]_{class}_Caudoviricetes	[Novel_Family]_{class}_Caudoviricetes	[Novel_Genus]_{class}_Caudoviricetes	Viruses	0.993	dsDNAphage	1	1	classified	VC33276	FALSE	TRUE	temperate
ma2024imeta	contig009918	contig036123	Duplodnaviria	Heunggongvirae	Uroviricota	Caudoviricetes	[Novel_Order]_{class}_Caudoviricetes	[Novel_Family]_{class}_Caudoviricetes	[Novel_Genus]_{class}_Caudoviricetes	Viruses	1	dsDNAphage	1	1	classified	VC68907	FALSE	TRUE	virulent
ma2024imeta	contig009919	contig009919	Duplodnaviria	Heunggongvirae	Uroviricota	Caudoviricetes	[Novel_Order]_{class}_Caudoviricetes	[Novel_Family]_{class}_Caudoviricetes	[Novel_Genus]_{class}_Caudoviricetes	Viruses	0.993	dsDNAphage	1	1	classified	VC38985	FALSE	TRUE	virulent
ma2024imeta	contig009922	contig009922	Duplodnaviria	Heunggongvirae	Uroviricota	Caudoviricetes	[Novel_Order]_{class}_Caudoviricetes	[Novel_Family]_{class}_Caudoviricetes	[Novel_Genus]_{class}_Caudoviricetes	Viruses	1	dsDNAphage	1	1	classified	VC57055	FALSE	TRUE	temperate
ma2024imeta	contig009930	contig009930	Duplodnaviria	Heunggongvirae	Uroviricota	Caudoviricetes	[Novel_Order]_{class}_Caudoviricetes	[Novel_Family]_{class}_Caudoviricetes	[Novel_Genus]_{class}_Caudoviricetes	Viruses	1	dsDNAphage	1	1	classified	VC23749	FALSE	TRUE	temperate
ma2024imeta	contig009934	contig009934	Duplodnaviria	Heunggongvirae	Uroviricota	Caudoviricetes	[Novel_Order]_{class}_Caudoviricetes	[Novel_Family]_{class}_Caudoviricetes	[Novel_Genus]_{class}_Caudoviricetes	Viruses	1	dsDNAphage	1	1	classified	VC44946	FALSE	TRUE	temperate
ma2024imeta	contig009942	contig009942	Monodnaviria	Sangervirae	Phixviricota	Malgrandaviricetes	Petitvirales	Microviridae	[Novel_Genus]_{family}_Microviridae	Viruses	0.993	dsDNAphage	1	1	unclassified	VC77590	FALSE	FALSE	virulent
ma2024imeta	contig009998	contig009998	Monodnaviria	Sangervirae	Phixviricota	Malgrandaviricetes	Petitvirales	Microviridae	[Novel_Genus]_{family}_Microviridae	Viruses	0.98	dsDNAphage	1	4	unclassified	VC77591	FALSE	FALSE	virulent
ma2024imeta	contig010095	contig010095	Duplodnaviria	Heunggongvirae	Uroviricota	Caudoviricetes	[Novel_Order]_{class}_Caudoviricetes	[Novel_Family]_{class}_Caudoviricetes	[Novel_Genus]_{class}_Caudoviricetes	Viruses	1	dsDNAphage	1	1	classified	VC60418	FALSE	TRUE	temperate
ma2024imeta	contig010114	contig139000	Duplodnaviria	Heunggongvirae	Uroviricota	Caudoviricetes	[Novel_Order]_{class}_Caudoviricetes	[Novel_Family]_{class}_Caudoviricetes	[Novel_Genus]_{class}_Caudoviricetes	Viruses	0.993	dsDNAphage	1	1	classified	VC61616	FALSE	TRUE	temperate
ma2024imeta	contig010132	contig010132	Duplodnaviria	Heunggongvirae	Uroviricota	Caudoviricetes	[Novel_Order]_{class}_Caudoviricetes	[Novel_Family]_{class}_Caudoviricetes	[Novel_Genus]_{class}_Caudoviricetes	Viruses	1	dsDNAphage	1	3	classified	VC04806	FALSE	TRUE	virulent
ma2024imeta	contig010311	contig010311	Duplodnaviria	Heunggongvirae	Uroviricota	Caudoviricetes	[Novel_Order]_{class}_Caudoviricetes	[Novel_Family]_{class}_Caudoviricetes	[Novel_Genus]_{class}_Caudoviricetes	Viruses	1	dsDNAphage	1	2	classified	VC40795	FALSE	TRUE	virulent
ma2024imeta	contig010323	contig010323	Duplodnaviria	Heunggongvirae	Uroviricota	Caudoviricetes	[Novel_Order]_{class}_Caudoviricetes	[Novel_Family]_{class}_Caudoviricetes	[Novel_Genus]_{class}_Caudoviricetes	Viruses	0.987	dsDNAphage	1	1	classified	VC18209	FALSE	TRUE	temperate
ma2024imeta	contig010401	contig010401	Duplodnaviria	Heunggongvirae	Uroviricota	Caudoviricetes	[Novel_Order]_{class}_Caudoviricetes	[Novel_Family]_{class}_Caudoviricetes	[Novel_Genus]_{class}_Caudoviricetes	Viruses	0.993	dsDNAphage	1	3	classified	VC20325	FALSE	TRUE	virulent
ma2024imeta	contig010489	contig010489	Duplodnaviria	Heunggongvirae	Uroviricota	Caudoviricetes	[Novel_Order]_{class}_Caudoviricetes	[Novel_Family]_{class}_Caudoviricetes	[Novel_Genus]_{class}_Caudoviricetes	Viruses	0.993	dsDNAphage	1	3	classified	VC40923	FALSE	TRUE	temperate
ma2024imeta	contig010506	contig010506	Duplodnaviria	Heunggongvirae	Uroviricota	Caudoviricetes	[Novel_Order]_{class}_Caudoviricetes	[Novel_Family]_{class}_Caudoviricetes	[Novel_Genus]_{class}_Caudoviricetes	Viruses	1	dsDNAphage	1	1	classified	VC30896	FALSE	TRUE	virulent
ma2024imeta	contig010624	contig010624	Duplodnaviria	Heunggongvirae	Uroviricota	Caudoviricetes	[Novel_Order]_{class}_Caudoviricetes	[Novel_Family]_{class}_Caudoviricetes	[Novel_Genus]_{class}_Caudoviricetes	Viruses	1	dsDNAphage	1	4	classified	VC37795	FALSE	TRUE	temperate
ma2024imeta	contig010821	contig010821	Duplodnaviria	Heunggongvirae	Uroviricota	Caudoviricetes	[Novel_Order]_{class}_Caudoviricetes	[Novel_Family]_{class}_Caudoviricetes	[Novel_Genus]_{class}_Caudoviricetes	Viruses	0.987	dsDNAphage	1	1	classified	VC46885	FALSE	TRUE	virulent
ma2024imeta	contig010836	contig010836	Duplodnaviria	Heunggongvirae	Uroviricota	Caudoviricetes	[Novel_Order]_{class}_Caudoviricetes	[Novel_Family]_{class}_Caudoviricetes	[Novel_Genus]_{class}_Caudoviricetes	Viruses	1	dsDNAphage	1	3	classified	VC53129	FALSE	TRUE	temperate
ma2024imeta	contig010853	contig010853	Duplodnaviria	Heunggongvirae	Uroviricota	Caudoviricetes	[Novel_Order]_{class}_Caudoviricetes	[Novel_Family]_{class}_Caudoviricetes	[Novel_Genus]_{class}_Caudoviricetes	Viruses	1	dsDNAphage	1	1	classified	VC24773	FALSE	TRUE	temperate
ma2024imeta	contig010931	contig010931	Duplodnaviria	Heunggongvirae	Uroviricota	Caudoviricetes	[Novel_Order]_{class}_Caudoviricetes	[Novel_Family]_{class}_Caudoviricetes	[Novel_Genus]_{class}_Caudoviricetes	Viruses	0.987	dsDNAphage	1	2	classified	VC41146	FALSE	TRUE	virulent
ma2024imeta	contig010986	contig010986	Duplodnaviria	Heunggongvirae	Uroviricota	Caudoviricetes	[Novel_Order]_{class}_Caudoviricetes	[Novel_Family]_{class}_Caudoviricetes	[Novel_Genus]_{class}_Caudoviricetes	Viruses	0.973	dsDNAphage	1	1	classified	VC27785	FALSE	TRUE	temperate
ma2024imeta	contig010990	contig010990	Duplodnaviria	Heunggongvirae	Uroviricota	Caudoviricetes	[Novel_Order]_{class}_Caudoviricetes	[Novel_Family]_{class}_Caudoviricetes	[Novel_Genus]_{class}_Caudoviricetes	Viruses	1	dsDNAphage	1	1	classified	VC31574	FALSE	TRUE	temperate
ma2024imeta	contig010991	contig011218	Duplodnaviria	Heunggongvirae	Uroviricota	Caudoviricetes	[Novel_Order]_{class}_Caudoviricetes	[Novel_Family]_{class}_Caudoviricetes	[Novel_Genus]_{class}_Caudoviricetes	Viruses	0.993	dsDNAphage	1	1	classified	VC46891	FALSE	TRUE	virulent
ma2024imeta	contig010993	contig010993	Duplodnaviria	Heunggongvirae	Uroviricota	Caudoviricetes	[Novel_Order]_{class}_Caudoviricetes	[Novel_Family]_{class}_Caudoviricetes	[Novel_Genus]_{class}_Caudoviricetes	Viruses	0.987	dsDNAphage	1	1	classified	VC27055	FALSE	TRUE	virulent
ma2024imeta	contig010995	contig010995	Duplodnaviria	Heunggongvirae	Uroviricota	Caudoviricetes	[Novel_Order]_{class}_Caudoviricetes	[Novel_Family]_{class}_Caudoviricetes	[Novel_Genus]_{class}_Caudoviricetes	Viruses	0.987	dsDNAphage	1	1	classified	VC30883	FALSE	TRUE	temperate
ma2024imeta	contig010996	contig010996	Monodnaviria	Sangervirae	Phixviricota	Malgrandaviricetes	Petitvirales	Microviridae	[Novel_Genus]_{family}_Microviridae	Viruses	1	lavidaviridae	2	1	unclassified	VC77592	FALSE	FALSE	virulent
ma2024imeta	contig011021	contig011021	Duplodnaviria	Heunggongvirae	Uroviricota	Caudoviricetes	[Novel_Order]_{class}_Caudoviricetes	[Novel_Family]_{class}_Caudoviricetes	[Novel_Genus]_{class}_Caudoviricetes	Viruses	1	dsDNAphage	1	2	classified	VC38074	FALSE	TRUE	temperate
ma2024imeta	contig011040	contig011040	Duplodnaviria	Heunggongvirae	Uroviricota	Caudoviricetes	[Novel_Order]_{class}_Caudoviricetes	[Novel_Family]_{class}_Caudoviricetes	[Novel_Genus]_{class}_Caudoviricetes	Viruses	0.993	dsDNAphage	1	3	classified	VC38363	FALSE	TRUE	temperate
ma2024imeta	contig011055	contig011055	Duplodnaviria	Heunggongvirae	Uroviricota	Caudoviricetes	[Novel_Order]_{class}_Caudoviricetes	[Novel_Family]_{class}_Caudoviricetes	[Novel_Genus]_{class}_Caudoviricetes	Viruses	0.987	dsDNAphage	1	1	classified	VC56715	FALSE	TRUE	temperate
ma2024imeta	contig011077	contig011077	Duplodnaviria	Heunggongvirae	Uroviricota	Caudoviricetes	[Novel_Order]_{class}_Caudoviricetes	[Novel_Family]_{class}_Caudoviricetes	[Novel_Genus]_{class}_Caudoviricetes	Viruses	1	dsDNAphage	1	1	classified	VC43347	FALSE	TRUE	temperate
ma2024imeta	contig011117	contig011117	Duplodnaviria	Heunggongvirae	Uroviricota	Caudoviricetes	[Novel_Order]_{class}_Caudoviricetes	[Novel_Family]_{class}_Caudoviricetes	[Novel_Genus]_{class}_Caudoviricetes	Viruses	0.987	dsDNAphage	1	3	classified	VC61225	FALSE	TRUE	temperate
ma2024imeta	contig011393	contig278327	Duplodnaviria	Heunggongvirae	Uroviricota	Caudoviricetes	[Novel_Order]_{class}_Caudoviricetes	[Novel_Family]_{class}_Caudoviricetes	[Novel_Genus]_{class}_Caudoviricetes	Viruses	1	dsDNAphage	1	1	classified	VC61642	FALSE	TRUE	temperate
ma2024imeta	contig011512	contig011512	Duplodnaviria	Heunggongvirae	Uroviricota	Caudoviricetes	[Novel_Order]_{class}_Caudoviricetes	[Novel_Family]_{class}_Caudoviricetes	[Novel_Genus]_{class}_Caudoviricetes	Viruses	0.987	dsDNAphage	1	1	classified	VC30689	FALSE	TRUE	virulent
ma2024imeta	contig011529	contig011529	Duplodnaviria	Heunggongvirae	Uroviricota	Caudoviricetes	[Novel_Order]_{class}_Caudoviricetes	[Novel_Family]_{class}_Caudoviricetes	[Novel_Genus]_{class}_Caudoviricetes	Viruses	1	dsDNAphage	1	1	classified	VC68850	FALSE	TRUE	virulent
ma2024imeta	contig011546	contig011546	Duplodnaviria	Heunggongvirae	Uroviricota	Caudoviricetes	[Novel_Order]_{class}_Caudoviricetes	[Novel_Family]_{class}_Caudoviricetes	[Novel_Genus]_{class}_Caudoviricetes	Viruses	0.993	dsDNAphage	1	3	classified	VC20735	FALSE	TRUE	virulent
ma2024imeta	contig011569	contig011569	Duplodnaviria	Heunggongvirae	Uroviricota	Caudoviricetes	[Novel_Order]_{class}_Caudoviricetes	[Novel_Family]_{class}_Caudoviricetes	[Novel_Genus]_{class}_Caudoviricetes	Viruses	1	dsDNAphage	1	3	classified	VC40757	FALSE	TRUE	temperate
ma2024imeta	contig011587	contig011587	Duplodnaviria	Heunggongvirae	Uroviricota	Caudoviricetes	[Novel_Order]_{class}_Caudoviricetes	[Novel_Family]_{class}_Caudoviricetes	[Novel_Genus]_{class}_Caudoviricetes	Viruses	1	dsDNAphage	1	2	classified	VC33671	FALSE	TRUE	temperate
ma2024imeta	contig011606	contig011606	Duplodnaviria	Heunggongvirae	Uroviricota	Caudoviricetes	[Novel_Order]_{class}_Caudoviricetes	[Novel_Family]_{class}_Caudoviricetes	[Novel_Genus]_{class}_Caudoviricetes	Viruses	0.993	dsDNAphage	1	1	classified	VC27361	FALSE	TRUE	virulent
ma2024imeta	contig011624	contig011624	Duplodnaviria	Heunggongvirae	Uroviricota	Caudoviricetes	[Novel_Order]_{class}_Caudoviricetes	[Novel_Family]_{class}_Caudoviricetes	[Novel_Genus]_{class}_Caudoviricetes	Viruses	0.993	dsDNAphage	1	4	classified	VC53032	FALSE	TRUE	virulent
ma2024imeta	contig011625	contig011625	Duplodnaviria	Heunggongvirae	Uroviricota	Caudoviricetes	[Novel_Order]_{class}_Caudoviricetes	[Novel_Family]_{class}_Caudoviricetes	[Novel_Genus]_{class}_Caudoviricetes	Viruses	0.953	dsDNAphage	1	1	classified	VC29823	FALSE	TRUE	temperate
ma2024imeta	contig011632	contig011632	Duplodnaviria	Heunggongvirae	Uroviricota	Caudoviricetes	[Novel_Order]_{class}_Caudoviricetes	[Novel_Family]_{class}_Caudoviricetes	[Novel_Genus]_{class}_Caudoviricetes	Viruses	0.993	dsDNAphage	1	3	classified	VC71140	FALSE	TRUE	temperate
ma2024imeta	contig011694	contig011694	Duplodnaviria	Heunggongvirae	Uroviricota	Caudoviricetes	[Novel_Order]_{class}_Caudoviricetes	[Novel_Family]_{class}_Caudoviricetes	[Novel_Genus]_{class}_Caudoviricetes	Viruses	1	dsDNAphage	1	1	classified	VC25546	FALSE	TRUE	virulent
ma2024imeta	contig011695	contig011695	Duplodnaviria	Heunggongvirae	Uroviricota	Caudoviricetes	[Novel_Order]_{class}_Caudoviricetes	[Novel_Family]_{class}_Caudoviricetes	[Novel_Genus]_{class}_Caudoviricetes	Viruses	1	dsDNAphage	1	1	classified	VC27574	FALSE	TRUE	virulent
ma2024imeta	contig011697	contig011697	Duplodnaviria	Heunggongvirae	Uroviricota	Caudoviricetes	[Novel_Order]_{class}_Caudoviricetes	[Novel_Family]_{class}_Caudoviricetes	[Novel_Genus]_{class}_Caudoviricetes	Viruses	0.993	dsDNAphage	1	1	classified	VC56731	FALSE	TRUE	virulent
ma2024imeta	contig011699	contig011699	Duplodnaviria	Heunggongvirae	Uroviricota	Caudoviricetes	[Novel_Order]_{class}_Caudoviricetes	[Novel_Family]_{class}_Caudoviricetes	[Novel_Genus]_{class}_Caudoviricetes	Viruses	1	dsDNAphage	1	1	classified	VC53109	FALSE	TRUE	temperate
ma2024imeta	contig011705	contig011705	Monodnaviria	Sangervirae	Phixviricota	Malgrandaviricetes	Petitvirales	Microviridae	[Novel_Genus]_{family}_Microviridae	Viruses	0.993	ssDNA	1	1	unclassified	VC77595	FALSE	FALSE	virulent
ma2024imeta	contig011717	contig011717	Duplodnaviria	Heunggongvirae	Uroviricota	Caudoviricetes	[Novel_Order]_{class}_Caudoviricetes	[Novel_Family]_{class}_Caudoviricetes	[Novel_Genus]_{class}_Caudoviricetes	Viruses	0.987	dsDNAphage	1	1	classified	VC29355	FALSE	TRUE	temperate
ma2024imeta	contig011792	contig011792	Duplodnaviria	Heunggongvirae	Uroviricota	Caudoviricetes	[Novel_Order]_{class}_Caudoviricetes	[Novel_Family]_{class}_Caudoviricetes	[Novel_Genus]_{class}_Caudoviricetes	Viruses	1	dsDNAphage	1	1	classified	VC43348	FALSE	TRUE	temperate
ma2024imeta	contig011881	contig011881	Duplodnaviria	Heunggongvirae	Uroviricota	Caudoviricetes	[Novel_Order]_{class}_Caudoviricetes	[Novel_Family]_{class}_Caudoviricetes	[Novel_Genus]_{class}_Caudoviricetes	Viruses	1	dsDNAphage	1	1	classified	VC32753	FALSE	TRUE	temperate
ma2024imeta	contig011892	contig011892	Duplodnaviria	Heunggongvirae	Uroviricota	Caudoviricetes	[Novel_Order]_{class}_Caudoviricetes	[Novel_Family]_{class}_Caudoviricetes	[Novel_Genus]_{class}_Caudoviricetes	Viruses	0.987	dsDNAphage	1	1	classified	VC25021	FALSE	TRUE	temperate
ma2024imeta	contig011989	contig016050	Duplodnaviria	Heunggongvirae	Uroviricota	Caudoviricetes	[Novel_Order]_{class}_Caudoviricetes	[Novel_Family]_{class}_Caudoviricetes	[Novel_Genus]_{class}_Caudoviricetes	Viruses	0.987	dsDNAphage	1	3	classified	VC42019	FALSE	TRUE	temperate
ma2024imeta	contig012122	contig012122	Duplodnaviria	Heunggongvirae	Uroviricota	Caudoviricetes	[Novel_Order]_{class}_Caudoviricetes	[Novel_Family]_{class}_Caudoviricetes	[Novel_Genus]_{class}_Caudoviricetes	Viruses	0.993	dsDNAphage	1	1	classified	VC39991	FALSE	TRUE	virulent
ma2024imeta	contig012132	contig012132	Duplodnaviria	Heunggongvirae	Uroviricota	Caudoviricetes	[Novel_Order]_{class}_Caudoviricetes	[Novel_Family]_{class}_Caudoviricetes	[Novel_Genus]_{class}_Caudoviricetes	Viruses	0.993	dsDNAphage	1	2	classified	VC39661	FALSE	TRUE	virulent
ma2024imeta	contig012292	contig012292	Duplodnaviria	Heunggongvirae	Uroviricota	Caudoviricetes	[Novel_Order]_{class}_Caudoviricetes	[Novel_Family]_{class}_Caudoviricetes	[Novel_Genus]_{class}_Caudoviricetes	Viruses	0.993	dsDNAphage	1	1	classified	VC60138	FALSE	TRUE	virulent
ma2024imeta	contig012353	contig012353	Duplodnaviria	Heunggongvirae	Uroviricota	Caudoviricetes	[Novel_Order]_{class}_Caudoviricetes	[Novel_Family]_{class}_Caudoviricetes	[Novel_Genus]_{class}_Caudoviricetes	Viruses	0.953	dsDNAphage	1	1	classified	VC06637	FALSE	TRUE	virulent
ma2024imeta	contig012408	contig012408	Duplodnaviria	Heunggongvirae	Uroviricota	Caudoviricetes	[Novel_Order]_{class}_Caudoviricetes	[Novel_Family]_{class}_Caudoviricetes	[Novel_Genus]_{class}_Caudoviricetes	Viruses	0.993	dsDNAphage	1	1	classified	VC62417	FALSE	TRUE	virulent
ma2024imeta	contig012497	contig012497	Duplodnaviria	Heunggongvirae	Uroviricota	Caudoviricetes	[Novel_Order]_{class}_Caudoviricetes	[Novel_Family]_{class}_Caudoviricetes	[Novel_Genus]_{class}_Caudoviricetes	Viruses	1	dsDNAphage	1	1	classified	VC67854	FALSE	TRUE	virulent
ma2024imeta	contig012551	contig012551	Duplodnaviria	Heunggongvirae	Uroviricota	Caudoviricetes	[Novel_Order]_{class}_Caudoviricetes	[Novel_Family]_{class}_Caudoviricetes	[Novel_Genus]_{class}_Caudoviricetes	Viruses	1	dsDNAphage	1	1	classified	VC67179	FALSE	TRUE	virulent
ma2024imeta	contig012561	contig012561	Duplodnaviria	Heunggongvirae	Uroviricota	Caudoviricetes	[Novel_Order]_{class}_Caudoviricetes	[Novel_Family]_{class}_Caudoviricetes	[Novel_Genus]_{class}_Caudoviricetes	Viruses	1	dsDNAphage	1	3	classified	VC20577	FALSE	TRUE	virulent
ma2024imeta	contig012592	contig012592	Duplodnaviria	Heunggongvirae	Uroviricota	Caudoviricetes	[Novel_Order]_{class}_Caudoviricetes	[Novel_Family]_{class}_Caudoviricetes	[Novel_Genus]_{class}_Caudoviricetes	Viruses	1	dsDNAphage	1	1	classified	VC69125	FALSE	TRUE	virulent
ma2024imeta	contig012613	contig012613	Duplodnaviria	Heunggongvirae	Uroviricota	Caudoviricetes	[Novel_Order]_{class}_Caudoviricetes	[Novel_Family]_{class}_Caudoviricetes	[Novel_Genus]_{class}_Caudoviricetes	Viruses	1	dsDNAphage	1	1	classified	VC23747	FALSE	TRUE	temperate
ma2024imeta	contig012648	contig012648	Duplodnaviria	Heunggongvirae	Uroviricota	Caudoviricetes	[Novel_Order]_{class}_Caudoviricetes	[Novel_Family]_{class}_Caudoviricetes	[Novel_Genus]_{class}_Caudoviricetes	Viruses	1	dsDNAphage	1	4	classified	VC75422	FALSE	TRUE	virulent
ma2024imeta	contig012655	contig012655	Duplodnaviria	Heunggongvirae	Uroviricota	Caudoviricetes	[Novel_Order]_{class}_Caudoviricetes	[Novel_Family]_{class}_Caudoviricetes	[Novel_Genus]_{class}_Caudoviricetes	Viruses	1	dsDNAphage	1	1	classified	VC62166	FALSE	TRUE	temperate
ma2024imeta	contig012691	contig012691	Duplodnaviria	Heunggongvirae	Uroviricota	Caudoviricetes	[Novel_Order]_{class}_Caudoviricetes	[Novel_Family]_{class}_Caudoviricetes	[Novel_Genus]_{class}_Caudoviricetes	Viruses	1	dsDNAphage	1	3	classified	VC00187	FALSE	TRUE	virulent
ma2024imeta	contig012693	contig012693	Duplodnaviria	Heunggongvirae	Uroviricota	Caudoviricetes	[Novel_Order]_{class}_Caudoviricetes	[Novel_Family]_{class}_Caudoviricetes	[Novel_Genus]_{class}_Caudoviricetes	Viruses	1	dsDNAphage	1	3	classified	VC53074	FALSE	TRUE	virulent
ma2024imeta	contig012747	contig014453	Duplodnaviria	Heunggongvirae	Uroviricota	Caudoviricetes	[Novel_Order]_{class}_Caudoviricetes	[Novel_Family]_{class}_Caudoviricetes	[Novel_Genus]_{class}_Caudoviricetes	Viruses	0.98	dsDNAphage	1	1	classified	VC02514	FALSE	TRUE	temperate
ma2024imeta	contig012764	contig012764	Duplodnaviria	Heunggongvirae	Uroviricota	Caudoviricetes	[Novel_Order]_{class}_Caudoviricetes	[Novel_Family]_{class}_Caudoviricetes	[Novel_Genus]_{class}_Caudoviricetes	Viruses	1	dsDNAphage	1	4	classified	VC76602	FALSE	TRUE	virulent
ma2024imeta	contig012933	contig012933	Duplodnaviria	Heunggongvirae	Uroviricota	Caudoviricetes	[Novel_Order]_{class}_Caudoviricetes	[Novel_Family]_{class}_Caudoviricetes	[Novel_Genus]_{class}_Caudoviricetes	Viruses	1	dsDNAphage	1	1	classified	VC64937	FALSE	TRUE	virulent
ma2024imeta	contig012949	contig012949	Duplodnaviria	Heunggongvirae	Uroviricota	Caudoviricetes	[Novel_Order]_{class}_Caudoviricetes	[Novel_Family]_{class}_Caudoviricetes	[Novel_Genus]_{class}_Caudoviricetes	Viruses	1	dsDNAphage	1	2	classified	VC20324	FALSE	TRUE	virulent
ma2024imeta	contig012955	contig012955	Duplodnaviria	Heunggongvirae	Uroviricota	Caudoviricetes	[Novel_Order]_{class}_Caudoviricetes	[Novel_Family]_{class}_Caudoviricetes	[Novel_Genus]_{class}_Caudoviricetes	Viruses	0.993	dsDNAphage	1	1	classified	VC70853	FALSE	TRUE	virulent
ma2024imeta	contig012957	contig012957	Duplodnaviria	Heunggongvirae	Uroviricota	Caudoviricetes	[Novel_Order]_{class}_Caudoviricetes	[Novel_Family]_{class}_Caudoviricetes	[Novel_Genus]_{class}_Caudoviricetes	Viruses	1	dsDNAphage	1	1	classified	VC20674	FALSE	TRUE	virulent
ma2024imeta	contig012960	contig012960	Duplodnaviria	Heunggongvirae	Uroviricota	Caudoviricetes	[Novel_Order]_{class}_Caudoviricetes	[Novel_Family]_{class}_Caudoviricetes	[Novel_Genus]_{class}_Caudoviricetes	Viruses	1	dsDNAphage	1	3	classified	VC66068	FALSE	TRUE	virulent
ma2024imeta	contig012961	contig012961	Duplodnaviria	Heunggongvirae	Uroviricota	Caudoviricetes	[Novel_Order]_{class}_Caudoviricetes	[Novel_Family]_{class}_Caudoviricetes	[Novel_Genus]_{class}_Caudoviricetes	Viruses	1	dsDNAphage	1	1	classified	VC69132	FALSE	TRUE	virulent
ma2024imeta	contig012963	contig012963	Duplodnaviria	Heunggongvirae	Uroviricota	Caudoviricetes	[Novel_Order]_{class}_Caudoviricetes	[Novel_Family]_{class}_Caudoviricetes	[Novel_Genus]_{class}_Caudoviricetes	Viruses	1	dsDNAphage	1	1	classified	VC45005	FALSE	TRUE	temperate
ma2024imeta	contig012966	contig012966	Duplodnaviria	Heunggongvirae	Uroviricota	Caudoviricetes	[Novel_Order]_{class}_Caudoviricetes	[Novel_Family]_{class}_Caudoviricetes	[Novel_Genus]_{class}_Caudoviricetes	Viruses	0.993	dsDNAphage	1	1	classified	VC52290	FALSE	TRUE	temperate
ma2024imeta	contig012967	contig012967	Duplodnaviria	Heunggongvirae	Uroviricota	Caudoviricetes	[Novel_Order]_{class}_Caudoviricetes	[Novel_Family]_{class}_Caudoviricetes	[Novel_Genus]_{class}_Caudoviricetes	Viruses	1	dsDNAphage	1	1	classified	VC02489	FALSE	TRUE	temperate
ma2024imeta	contig013034	contig013034	Duplodnaviria	Heunggongvirae	Uroviricota	Caudoviricetes	[Novel_Order]_{class}_Caudoviricetes	[Novel_Family]_{class}_Caudoviricetes	[Novel_Genus]_{class}_Caudoviricetes	Viruses	0.98	dsDNAphage	1	1	classified	VC33468	FALSE	TRUE	temperate
ma2024imeta	contig013088	contig013088	Duplodnaviria	Heunggongvirae	Uroviricota	Caudoviricetes	[Novel_Order]_{class}_Caudoviricetes	[Novel_Family]_{class}_Caudoviricetes	[Novel_Genus]_{class}_Caudoviricetes	Viruses	0.98	dsDNAphage	1	3	classified	VC22722	FALSE	TRUE	temperate
ma2024imeta	contig013157	contig013157	Duplodnaviria	Heunggongvirae	Uroviricota	Caudoviricetes	[Novel_Order]_{class}_Caudoviricetes	[Novel_Family]_{class}_Caudoviricetes	[Novel_Genus]_{class}_Caudoviricetes	Viruses	1	dsDNAphage	1	4	classified	VC38356	FALSE	TRUE	temperate
ma2024imeta	contig013208	contig013208	Duplodnaviria	Heunggongvirae	Uroviricota	Caudoviricetes	[Novel_Order]_{class}_Caudoviricetes	[Novel_Family]_{class}_Caudoviricetes	[Novel_Genus]_{class}_Caudoviricetes	Viruses	1	dsDNAphage	1	2	classified	VC21824	FALSE	TRUE	virulent
ma2024imeta	contig013254	contig013254	Duplodnaviria	Heunggongvirae	Uroviricota	Caudoviricetes	[Novel_Order]_{class}_Caudoviricetes	[Novel_Family]_{class}_Caudoviricetes	[Novel_Genus]_{class}_Caudoviricetes	Viruses	0.993	dsDNAphage	1	3	classified	VC20252	FALSE	TRUE	temperate
ma2024imeta	contig013283	contig013283	Duplodnaviria	Heunggongvirae	Uroviricota	Caudoviricetes	[Novel_Order]_{class}_Caudoviricetes	[Novel_Family]_{class}_Caudoviricetes	[Novel_Genus]_{class}_Caudoviricetes	Viruses	1	dsDNAphage	1	1	classified	VC34890	FALSE	TRUE	virulent
ma2024imeta	contig013331	contig013331	Duplodnaviria	Heunggongvirae	Uroviricota	Caudoviricetes	[Novel_Order]_{class}_Caudoviricetes	[Novel_Family]_{class}_Caudoviricetes	[Novel_Genus]_{class}_Caudoviricetes	Viruses	0.973	dsDNAphage	1	1	classified	VC33504	FALSE	TRUE	temperate
ma2024imeta	contig013400	contig013400	Duplodnaviria	Heunggongvirae	Uroviricota	Caudoviricetes	[Novel_Order]_{class}_Caudoviricetes	[Novel_Family]_{class}_Caudoviricetes	[Novel_Genus]_{class}_Caudoviricetes	Viruses	0.993	dsDNAphage	1	3	classified	VC66259	FALSE	TRUE	virulent
ma2024imeta	contig013405	contig013405	Duplodnaviria	Heunggongvirae	Uroviricota	Caudoviricetes	[Novel_Order]_{class}_Caudoviricetes	[Novel_Family]_{class}_Caudoviricetes	[Novel_Genus]_{class}_Caudoviricetes	Viruses	0.947	dsDNAphage	1	2	classified	VC12037	FALSE	TRUE	virulent
ma2024imeta	contig013458	contig013458	Duplodnaviria	Heunggongvirae	Uroviricota	Caudoviricetes	[Novel_Order]_{class}_Caudoviricetes	[Novel_Family]_{class}_Caudoviricetes	[Novel_Genus]_{class}_Caudoviricetes	Viruses	0.993	dsDNAphage	1	1	classified	VC67632	FALSE	TRUE	virulent
ma2024imeta	contig013640	contig045781	Duplodnaviria	Heunggongvirae	Uroviricota	Caudoviricetes	[Novel_Order]_{class}_Caudoviricetes	[Novel_Family]_{class}_Caudoviricetes	[Novel_Genus]_{class}_Caudoviricetes	Viruses	0.98	dsDNAphage	1	1	classified	VC66060	FALSE	TRUE	virulent
ma2024imeta	contig013683	contig013683	Duplodnaviria	Heunggongvirae	Uroviricota	Caudoviricetes	[Novel_Order]_{class}_Caudoviricetes	[Novel_Family]_{class}_Caudoviricetes	[Novel_Genus]_{class}_Caudoviricetes	Viruses	1	dsDNAphage	1	1	classified	VC71258	FALSE	TRUE	virulent
ma2024imeta	contig013733	contig013733	Duplodnaviria	Heunggongvirae	Uroviricota	Caudoviricetes	[Novel_Order]_{class}_Caudoviricetes	[Novel_Family]_{class}_Caudoviricetes	[Novel_Genus]_{class}_Caudoviricetes	Viruses	0.98	dsDNAphage	1	1	classified	VC44958	FALSE	TRUE	virulent
ma2024imeta	contig013740	contig013740	Duplodnaviria	Heunggongvirae	Uroviricota	Caudoviricetes	[Novel_Order]_{class}_Caudoviricetes	[Novel_Family]_{class}_Caudoviricetes	[Novel_Genus]_{class}_Caudoviricetes	Viruses	1	dsDNAphage	1	1	classified	VC38659	FALSE	TRUE	virulent
ma2024imeta	contig013745	contig013745	Duplodnaviria	Heunggongvirae	Uroviricota	Caudoviricetes	[Novel_Order]_{class}_Caudoviricetes	[Novel_Family]_{class}_Caudoviricetes	[Novel_Genus]_{class}_Caudoviricetes	Viruses	0.993	dsDNAphage	1	1	classified	VC66054	FALSE	TRUE	virulent
ma2024imeta	contig013863	contig013863	Duplodnaviria	Heunggongvirae	Uroviricota	Caudoviricetes	[Novel_Order]_{class}_Caudoviricetes	[Novel_Family]_{class}_Caudoviricetes	[Novel_Genus]_{class}_Caudoviricetes	Viruses	0.993	dsDNAphage	1	1	classified	VC68516	FALSE	TRUE	temperate
ma2024imeta	contig013864	contig013864	Monodnaviria	Sangervirae	Phixviricota	Malgrandaviricetes	Petitvirales	Microviridae	[Novel_Genus]_{family}_Microviridae	Viruses	0.993	dsDNAphage	1	1	unclassified	VC77596	FALSE	FALSE	virulent
ma2024imeta	contig013918	contig013918	Duplodnaviria	Heunggongvirae	Uroviricota	Caudoviricetes	[Novel_Order]_{class}_Caudoviricetes	[Novel_Family]_{class}_Caudoviricetes	[Novel_Genus]_{class}_Caudoviricetes	Viruses	1	dsDNAphage	1	4	classified	VC75403	FALSE	TRUE	virulent
ma2024imeta	contig014030	contig014030	Duplodnaviria	Heunggongvirae	Uroviricota	Caudoviricetes	[Novel_Order]_{class}_Caudoviricetes	[Novel_Family]_{class}_Caudoviricetes	[Novel_Genus]_{class}_Caudoviricetes	Viruses	0.993	dsDNAphage	1	1	classified	VC29728	FALSE	TRUE	virulent
ma2024imeta	contig014035	contig014035	Duplodnaviria	Heunggongvirae	Uroviricota	Caudoviricetes	[Novel_Order]_{class}_Caudoviricetes	[Novel_Family]_{class}_Caudoviricetes	[Novel_Genus]_{class}_Caudoviricetes	Viruses	1	dsDNAphage	1	1	classified	VC71056	FALSE	TRUE	temperate
ma2024imeta	contig014048	contig014048	Duplodnaviria	Heunggongvirae	Uroviricota	Caudoviricetes	[Novel_Order]_{class}_Caudoviricetes	[Novel_Family]_{class}_Caudoviricetes	[Novel_Genus]_{class}_Caudoviricetes	Viruses	1	dsDNAphage	1	1	classified	VC27567	FALSE	TRUE	virulent
ma2024imeta	contig014188	contig014188	Duplodnaviria	Heunggongvirae	Uroviricota	Caudoviricetes	[Novel_Order]_{class}_Caudoviricetes	[Novel_Family]_{class}_Caudoviricetes	[Novel_Genus]_{class}_Caudoviricetes	Viruses	1	dsDNAphage	1	3	classified	VC20585	FALSE	TRUE	virulent
ma2024imeta	contig014193	contig014193	Duplodnaviria	Heunggongvirae	Uroviricota	Caudoviricetes	[Novel_Order]_{class}_Caudoviricetes	[Novel_Family]_{class}_Caudoviricetes	[Novel_Genus]_{class}_Caudoviricetes	Viruses	1	dsDNAphage	1	1	classified	VC67179	FALSE	TRUE	virulent
ma2024imeta	contig014194	contig014194	Duplodnaviria	Heunggongvirae	Uroviricota	Caudoviricetes	[Novel_Order]_{class}_Caudoviricetes	[Novel_Family]_{class}_Caudoviricetes	[Novel_Genus]_{class}_Caudoviricetes	Viruses	0.98	dsDNAphage	1	1	classified	VC33452	FALSE	TRUE	temperate
ma2024imeta	contig014197	contig006446	Duplodnaviria	Heunggongvirae	Uroviricota	Caudoviricetes	[Novel_Order]_{class}_Caudoviricetes	[Novel_Family]_{class}_Caudoviricetes	[Novel_Genus]_{class}_Caudoviricetes	Viruses	1	dsDNAphage	1	1	classified	VC40921	FALSE	TRUE	temperate
ma2024imeta	contig014253	contig014253	Duplodnaviria	Heunggongvirae	Uroviricota	Caudoviricetes	[Novel_Order]_{class}_Caudoviricetes	[Novel_Family]_{class}_Caudoviricetes	[Novel_Genus]_{class}_Caudoviricetes	Viruses	0.987	dsDNAphage	1	4	classified	VC76648	FALSE	TRUE	virulent
ma2024imeta	contig014417	contig014417	Duplodnaviria	Heunggongvirae	Uroviricota	Caudoviricetes	[Novel_Order]_{class}_Caudoviricetes	[Novel_Family]_{class}_Caudoviricetes	[Novel_Genus]_{class}_Caudoviricetes	Viruses	1	dsDNAphage	1	1	classified	VC07792	FALSE	TRUE	virulent
ma2024imeta	contig014424	contig014424	Duplodnaviria	Heunggongvirae	Uroviricota	Caudoviricetes	[Novel_Order]_{class}_Caudoviricetes	[Novel_Family]_{class}_Caudoviricetes	[Novel_Genus]_{class}_Caudoviricetes	Viruses	0.987	dsDNAphage	1	1	classified	VC38550	FALSE	TRUE	temperate
ma2024imeta	contig014448	contig014448	Duplodnaviria	Heunggongvirae	Uroviricota	Caudoviricetes	[Novel_Order]_{class}_Caudoviricetes	[Novel_Family]_{class}_Caudoviricetes	[Novel_Genus]_{class}_Caudoviricetes	Viruses	1	dsDNAphage	1	1	classified	VC05942	FALSE	TRUE	virulent
ma2024imeta	contig014454	contig014454	Monodnaviria	Sangervirae	Phixviricota	Malgrandaviricetes	Petitvirales	Microviridae	[Novel_Genus]_{family}_Microviridae	Viruses	0.993	dsDNAphage	1	1	unclassified	VC78129	FALSE	FALSE	virulent
ma2024imeta	contig014455	contig014455	Monodnaviria	Sangervirae	Phixviricota	Malgrandaviricetes	Petitvirales	Microviridae	[Novel_Genus]_{family}_Microviridae	Viruses	0.993	dsDNAphage	1	1	unclassified	VC77597	FALSE	FALSE	virulent
ma2024imeta	contig014760	contig014760	Duplodnaviria	Heunggongvirae	Uroviricota	Caudoviricetes	[Novel_Order]_{class}_Caudoviricetes	[Novel_Family]_{class}_Caudoviricetes	[Novel_Genus]_{class}_Caudoviricetes	Viruses	1	dsDNAphage	1	3	classified	VC25130	FALSE	TRUE	virulent
ma2024imeta	contig014776	contig014776	Duplodnaviria	Heunggongvirae	Uroviricota	Caudoviricetes	[Novel_Order]_{class}_Caudoviricetes	[Novel_Family]_{class}_Caudoviricetes	[Novel_Genus]_{class}_Caudoviricetes	Viruses	1	dsDNAphage	1	1	classified	VC34295	FALSE	TRUE	temperate
ma2024imeta	contig014817	contig014817	Duplodnaviria	Heunggongvirae	Uroviricota	Caudoviricetes	[Novel_Order]_{class}_Caudoviricetes	[Novel_Family]_{class}_Caudoviricetes	[Novel_Genus]_{class}_Caudoviricetes	Viruses	1	dsDNAphage	1	4	classified	VC75294	FALSE	TRUE	virulent
ma2024imeta	contig014838	contig014838	Duplodnaviria	Heunggongvirae	Uroviricota	Caudoviricetes	[Novel_Order]_{class}_Caudoviricetes	[Novel_Family]_{class}_Caudoviricetes	[Novel_Genus]_{class}_Caudoviricetes	Viruses	0.98	dsDNAphage	1	1	classified	VC36830	FALSE	TRUE	virulent
ma2024imeta	contig014847	contig014847	Duplodnaviria	Heunggongvirae	Uroviricota	Caudoviricetes	[Novel_Order]_{class}_Caudoviricetes	[Novel_Family]_{class}_Caudoviricetes	[Novel_Genus]_{class}_Caudoviricetes	Viruses	1	dsDNAphage	1	3	classified	VC58260	FALSE	TRUE	temperate
ma2024imeta	contig014873	contig140134	Duplodnaviria	Heunggongvirae	Uroviricota	Caudoviricetes	[Novel_Order]_{class}_Caudoviricetes	[Novel_Family]_{class}_Caudoviricetes	[Novel_Genus]_{class}_Caudoviricetes	Viruses	0.993	dsDNAphage	1	3	classified	VC63028	FALSE	TRUE	temperate
ma2024imeta	contig014890	contig014890	Duplodnaviria	Heunggongvirae	Uroviricota	Caudoviricetes	[Novel_Order]_{class}_Caudoviricetes	[Novel_Family]_{class}_Caudoviricetes	[Novel_Genus]_{class}_Caudoviricetes	Viruses	0.967	dsDNAphage	1	1	classified	VC20501	FALSE	TRUE	virulent
ma2024imeta	contig014918	contig014918	Duplodnaviria	Heunggongvirae	Uroviricota	Caudoviricetes	[Novel_Order]_{class}_Caudoviricetes	[Novel_Family]_{class}_Caudoviricetes	[Novel_Genus]_{class}_Caudoviricetes	Viruses	0.987	dsDNAphage	1	3	classified	VC60222	FALSE	TRUE	temperate
ma2024imeta	contig014996	contig047031	Monodnaviria	Sangervirae	Phixviricota	Malgrandaviricetes	Petitvirales	Microviridae	[Novel_Genus]_{family}_Microviridae	Viruses	0.973	dsDNAphage	1	4	classified	VC18355	FALSE	TRUE	virulent
ma2024imeta	contig015042	contig015042	Duplodnaviria	Heunggongvirae	Uroviricota	Caudoviricetes	[Novel_Order]_{class}_Caudoviricetes	[Novel_Family]_{class}_Caudoviricetes	[Novel_Genus]_{class}_Caudoviricetes	Viruses	1	dsDNAphage	1	2	classified	VC57354	FALSE	TRUE	temperate
ma2024imeta	contig015071	contig015071	Duplodnaviria	Heunggongvirae	Uroviricota	Caudoviricetes	[Novel_Order]_{class}_Caudoviricetes	[Novel_Family]_{class}_Caudoviricetes	[Novel_Genus]_{class}_Caudoviricetes	Viruses	1	dsDNAphage	1	2	classified	VC37881	FALSE	TRUE	temperate
ma2024imeta	contig015097	contig015097	Duplodnaviria	Heunggongvirae	Uroviricota	Caudoviricetes	[Novel_Order]_{class}_Caudoviricetes	[Novel_Family]_{class}_Caudoviricetes	[Novel_Genus]_{class}_Caudoviricetes	Viruses	0.993	dsDNAphage	1	1	classified	VC66081	FALSE	TRUE	virulent
ma2024imeta	contig015098	contig015098	Monodnaviria	Sangervirae	Phixviricota	Malgrandaviricetes	Petitvirales	Microviridae	[Novel_Genus]_{family}_Microviridae	Viruses	1	dsDNAphage	1	1	unclassified	VC78140	FALSE	FALSE	virulent
ma2024imeta	contig015100	contig015100	Duplodnaviria	Heunggongvirae	Uroviricota	Caudoviricetes	[Novel_Order]_{class}_Caudoviricetes	[Novel_Family]_{class}_Caudoviricetes	[Novel_Genus]_{class}_Caudoviricetes	Viruses	0.987	dsDNAphage	1	1	classified	VC20042	FALSE	TRUE	temperate
ma2024imeta	contig015110	contig278412	Duplodnaviria	Heunggongvirae	Uroviricota	Caudoviricetes	[Novel_Order]_{class}_Caudoviricetes	[Novel_Family]_{class}_Caudoviricetes	[Novel_Genus]_{class}_Caudoviricetes	Viruses	1	dsDNAphage	1	1	classified	VC02577	FALSE	TRUE	temperate
ma2024imeta	contig015111	contig015111	Duplodnaviria	Heunggongvirae	Uroviricota	Caudoviricetes	[Novel_Order]_{class}_Caudoviricetes	[Novel_Family]_{class}_Caudoviricetes	[Novel_Genus]_{class}_Caudoviricetes	Viruses	0.993	dsDNAphage	1	1	classified	VC44962	FALSE	TRUE	temperate
ma2024imeta	contig015115	contig015115	Duplodnaviria	Heunggongvirae	Uroviricota	Caudoviricetes	[Novel_Order]_{class}_Caudoviricetes	[Novel_Family]_{class}_Caudoviricetes	[Novel_Genus]_{class}_Caudoviricetes	Viruses	0.987	dsDNAphage	1	1	classified	VC60293	FALSE	TRUE	virulent
ma2024imeta	contig015129	contig015129	Duplodnaviria	Heunggongvirae	Uroviricota	Caudoviricetes	[Novel_Order]_{class}_Caudoviricetes	[Novel_Family]_{class}_Caudoviricetes	[Novel_Genus]_{class}_Caudoviricetes	Viruses	0.993	dsDNAphage	1	1	classified	VC60157	FALSE	TRUE	temperate
ma2024imeta	contig015136	contig015136	Duplodnaviria	Heunggongvirae	Uroviricota	Caudoviricetes	[Novel_Order]_{class}_Caudoviricetes	[Novel_Family]_{class}_Caudoviricetes	[Novel_Genus]_{class}_Caudoviricetes	Viruses	1	dsDNAphage	1	1	classified	VC27102	FALSE	TRUE	virulent
ma2024imeta	contig015146	contig015146	Duplodnaviria	Heunggongvirae	Uroviricota	Caudoviricetes	[Novel_Order]_{class}_Caudoviricetes	[Novel_Family]_{class}_Caudoviricetes	[Novel_Genus]_{class}_Caudoviricetes	Viruses	0.94	dsDNAphage	1	2	classified	VC07477	FALSE	TRUE	virulent
ma2024imeta	contig015231	contig015231	Duplodnaviria	Heunggongvirae	Uroviricota	Caudoviricetes	[Novel_Order]_{class}_Caudoviricetes	[Novel_Family]_{class}_Caudoviricetes	[Novel_Genus]_{class}_Caudoviricetes	Viruses	0.993	dsDNAphage	1	1	classified	VC61174	FALSE	TRUE	virulent
ma2024imeta	contig015243	contig015243	Duplodnaviria	Heunggongvirae	Uroviricota	Caudoviricetes	[Novel_Order]_{class}_Caudoviricetes	[Novel_Family]_{class}_Caudoviricetes	[Novel_Genus]_{class}_Caudoviricetes	Viruses	0.987	dsDNAphage	1	3	classified	VC44269	FALSE	TRUE	virulent
ma2024imeta	contig015265	contig015265	Duplodnaviria	Heunggongvirae	Uroviricota	Caudoviricetes	[Novel_Order]_{class}_Caudoviricetes	[Novel_Family]_{class}_Caudoviricetes	[Novel_Genus]_{class}_Caudoviricetes	Viruses	1	dsDNAphage	1	3	classified	VC20871	FALSE	TRUE	virulent
ma2024imeta	contig015267	contig015267	Duplodnaviria	Heunggongvirae	Uroviricota	Caudoviricetes	[Novel_Order]_{class}_Caudoviricetes	[Novel_Family]_{class}_Caudoviricetes	[Novel_Genus]_{class}_Caudoviricetes	Viruses	1	dsDNAphage	1	1	classified	VC34299	FALSE	TRUE	temperate
ma2024imeta	contig015276	contig015276	Duplodnaviria	Heunggongvirae	Uroviricota	Caudoviricetes	[Novel_Order]_{class}_Caudoviricetes	[Novel_Family]_{class}_Caudoviricetes	[Novel_Genus]_{class}_Caudoviricetes	Viruses	0.993	dsDNAphage	1	1	classified	VC16365	FALSE	TRUE	virulent
ma2024imeta	contig015409	contig015409	Duplodnaviria	Heunggongvirae	Uroviricota	Caudoviricetes	[Novel_Order]_{class}_Caudoviricetes	[Novel_Family]_{class}_Caudoviricetes	[Novel_Genus]_{class}_Caudoviricetes	Viruses	1	dsDNAphage	1	1	classified	VC35037	FALSE	TRUE	temperate
ma2024imeta	contig015416	contig015416	Duplodnaviria	Heunggongvirae	Uroviricota	Caudoviricetes	[Novel_Order]_{class}_Caudoviricetes	[Novel_Family]_{class}_Caudoviricetes	[Novel_Genus]_{class}_Caudoviricetes	Viruses	0.987	dsDNAphage	1	1	classified	VC61838	FALSE	TRUE	virulent
ma2024imeta	contig015472	contig015472	Duplodnaviria	Heunggongvirae	Uroviricota	Caudoviricetes	[Novel_Order]_{class}_Caudoviricetes	[Novel_Family]_{class}_Caudoviricetes	[Novel_Genus]_{class}_Caudoviricetes	Viruses	1	dsDNAphage	1	1	classified	VC45787	FALSE	TRUE	virulent
ma2024imeta	contig015505	contig015505	Duplodnaviria	Heunggongvirae	Uroviricota	Caudoviricetes	[Novel_Order]_{class}_Caudoviricetes	[Novel_Family]_{class}_Caudoviricetes	[Novel_Genus]_{class}_Caudoviricetes	Viruses	1	dsDNAphage	1	1	classified	VC71056	FALSE	TRUE	temperate
ma2024imeta	contig015531	contig015531	Monodnaviria	Sangervirae	Phixviricota	Malgrandaviricetes	Petitvirales	Microviridae	[Novel_Genus]_{family}_Microviridae	Viruses	0.947	dsDNAphage	1	4	classified	VC18355	FALSE	TRUE	virulent
ma2024imeta	contig015613	contig015613	Duplodnaviria	Heunggongvirae	Uroviricota	Caudoviricetes	[Novel_Order]_{class}_Caudoviricetes	[Novel_Family]_{class}_Caudoviricetes	[Novel_Genus]_{class}_Caudoviricetes	Viruses	0.993	dsDNAphage	1	1	classified	VC52380	FALSE	TRUE	virulent
ma2024imeta	contig015627	contig015627	Monodnaviria	Sangervirae	Phixviricota	Malgrandaviricetes	Petitvirales	Microviridae	[Novel_Genus]_{family}_Microviridae	Viruses	0.993	dsDNAphage	1	4	classified	VC18347	FALSE	TRUE	virulent
ma2024imeta	contig015638	contig015638	Duplodnaviria	Heunggongvirae	Uroviricota	Caudoviricetes	[Novel_Order]_{class}_Caudoviricetes	[Novel_Family]_{class}_Caudoviricetes	[Novel_Genus]_{class}_Caudoviricetes	Viruses	0.98	dsDNAphage	1	1	classified	VC20737	FALSE	TRUE	virulent
ma2024imeta	contig015671	contig015671	Duplodnaviria	Heunggongvirae	Uroviricota	Caudoviricetes	[Novel_Order]_{class}_Caudoviricetes	[Novel_Family]_{class}_Caudoviricetes	[Novel_Genus]_{class}_Caudoviricetes	Viruses	1	dsDNAphage	1	1	classified	VC73946	FALSE	TRUE	virulent
ma2024imeta	contig015672	contig015672	Duplodnaviria	Heunggongvirae	Uroviricota	Caudoviricetes	[Novel_Order]_{class}_Caudoviricetes	[Novel_Family]_{class}_Caudoviricetes	[Novel_Genus]_{class}_Caudoviricetes	Viruses	1	dsDNAphage	1	3	classified	VC45305	FALSE	TRUE	virulent
ma2024imeta	contig015678	contig015678	Duplodnaviria	Heunggongvirae	Uroviricota	Caudoviricetes	[Novel_Order]_{class}_Caudoviricetes	[Novel_Family]_{class}_Caudoviricetes	[Novel_Genus]_{class}_Caudoviricetes	Viruses	0.98	dsDNAphage	1	3	classified	VC40948	FALSE	TRUE	temperate
ma2024imeta	contig015690	contig015690	Duplodnaviria	Heunggongvirae	Uroviricota	Caudoviricetes	[Novel_Order]_{class}_Caudoviricetes	[Novel_Family]_{class}_Caudoviricetes	[Novel_Genus]_{class}_Caudoviricetes	Viruses	0.993	dsDNAphage	1	1	classified	VC44958	FALSE	TRUE	temperate
ma2024imeta	contig015707	contig015707	Duplodnaviria	Heunggongvirae	Uroviricota	Caudoviricetes	[Novel_Order]_{class}_Caudoviricetes	[Novel_Family]_{class}_Caudoviricetes	[Novel_Genus]_{class}_Caudoviricetes	Viruses	1	dsDNAphage	1	2	classified	VC45747	FALSE	TRUE	virulent
ma2024imeta	contig015737	contig015737	Duplodnaviria	Heunggongvirae	Uroviricota	Caudoviricetes	[Novel_Order]_{class}_Caudoviricetes	[Novel_Family]_{class}_Caudoviricetes	[Novel_Genus]_{class}_Caudoviricetes	Viruses	0.993	dsDNAphage	1	1	classified	VC10235	FALSE	TRUE	temperate
ma2024imeta	contig015743	contig015743	Duplodnaviria	Heunggongvirae	Uroviricota	Caudoviricetes	[Novel_Order]_{class}_Caudoviricetes	[Novel_Family]_{class}_Caudoviricetes	[Novel_Genus]_{class}_Caudoviricetes	Viruses	0.993	dsDNAphage	1	1	classified	VC32098	FALSE	TRUE	temperate
ma2024imeta	contig015841	contig015841	Duplodnaviria	Heunggongvirae	Uroviricota	Caudoviricetes	[Novel_Order]_{class}_Caudoviricetes	[Novel_Family]_{class}_Caudoviricetes	[Novel_Genus]_{class}_Caudoviricetes	Viruses	1	dsDNAphage	1	4	classified	VC51561	FALSE	TRUE	virulent
ma2024imeta	contig015854	contig025176	Duplodnaviria	Heunggongvirae	Uroviricota	Caudoviricetes	[Novel_Order]_{class}_Caudoviricetes	[Novel_Family]_{class}_Caudoviricetes	[Novel_Genus]_{class}_Caudoviricetes	Viruses	1	dsDNAphage	1	1	classified	VC48535	FALSE	TRUE	temperate
ma2024imeta	contig015860	contig015860	Duplodnaviria	Heunggongvirae	Uroviricota	Caudoviricetes	[Novel_Order]_{class}_Caudoviricetes	[Novel_Family]_{class}_Caudoviricetes	[Novel_Genus]_{class}_Caudoviricetes	Viruses	0.993	dsDNAphage	1	3	classified	VC04906	FALSE	TRUE	virulent
ma2024imeta	contig015861	contig015861	Duplodnaviria	Heunggongvirae	Uroviricota	Caudoviricetes	[Novel_Order]_{class}_Caudoviricetes	[Novel_Family]_{class}_Caudoviricetes	[Novel_Genus]_{class}_Caudoviricetes	Viruses	0.993	dsDNAphage	1	1	classified	VC25365	FALSE	TRUE	temperate
ma2024imeta	contig015866	contig015866	Duplodnaviria	Heunggongvirae	Uroviricota	Caudoviricetes	[Novel_Order]_{class}_Caudoviricetes	[Novel_Family]_{class}_Caudoviricetes	[Novel_Genus]_{class}_Caudoviricetes	Viruses	1	dsDNAphage	1	1	classified	VC48529	FALSE	TRUE	virulent
ma2024imeta	contig015867	contig015867	Duplodnaviria	Heunggongvirae	Uroviricota	Caudoviricetes	[Novel_Order]_{class}_Caudoviricetes	[Novel_Family]_{class}_Caudoviricetes	[Novel_Genus]_{class}_Caudoviricetes	Viruses	0.993	dsDNAphage	1	1	classified	VC37424	FALSE	TRUE	temperate
ma2024imeta	contig015872	contig015872	Duplodnaviria	Heunggongvirae	Uroviricota	Caudoviricetes	[Novel_Order]_{class}_Caudoviricetes	[Novel_Family]_{class}_Caudoviricetes	[Novel_Genus]_{class}_Caudoviricetes	Viruses	0.993	dsDNAphage	1	1	classified	VC67179	FALSE	TRUE	virulent
ma2024imeta	contig015876	contig015876	Duplodnaviria	Heunggongvirae	Uroviricota	Caudoviricetes	[Novel_Order]_{class}_Caudoviricetes	[Novel_Family]_{class}_Caudoviricetes	[Novel_Genus]_{class}_Caudoviricetes	Viruses	0.993	dsDNAphage	1	1	classified	VC19743	FALSE	TRUE	virulent
ma2024imeta	contig015879	contig015879	Duplodnaviria	Heunggongvirae	Uroviricota	Caudoviricetes	[Novel_Order]_{class}_Caudoviricetes	[Novel_Family]_{class}_Caudoviricetes	[Novel_Genus]_{class}_Caudoviricetes	Viruses	0.993	dsDNAphage	1	1	classified	VC20495	FALSE	TRUE	virulent
ma2024imeta	contig015881	contig015881	Monodnaviria	Sangervirae	Phixviricota	Malgrandaviricetes	Petitvirales	Microviridae	[Novel_Genus]_{family}_Microviridae	Viruses	1	dsDNAphage	1	1	unclassified	VC78155	FALSE	FALSE	virulent
ma2024imeta	contig015883	contig015883	Duplodnaviria	Heunggongvirae	Uroviricota	Caudoviricetes	[Novel_Order]_{class}_Caudoviricetes	[Novel_Family]_{class}_Caudoviricetes	[Novel_Genus]_{class}_Caudoviricetes	Viruses	1	dsDNAphage	1	1	classified	VC68732	FALSE	TRUE	virulent
ma2024imeta	contig015885	contig015885	Duplodnaviria	Heunggongvirae	Uroviricota	Caudoviricetes	[Novel_Order]_{class}_Caudoviricetes	[Novel_Family]_{class}_Caudoviricetes	[Novel_Genus]_{class}_Caudoviricetes	Viruses	0.993	dsDNAphage	1	1	classified	VC30751	FALSE	TRUE	temperate
ma2024imeta	contig015887	contig015887	Duplodnaviria	Heunggongvirae	Uroviricota	Caudoviricetes	[Novel_Order]_{class}_Caudoviricetes	[Novel_Family]_{class}_Caudoviricetes	[Novel_Genus]_{class}_Caudoviricetes	Viruses	0.987	dsDNAphage	1	1	classified	VC27825	FALSE	TRUE	virulent
ma2024imeta	contig015891	contig015891	Duplodnaviria	Heunggongvirae	Uroviricota	Caudoviricetes	[Novel_Order]_{class}_Caudoviricetes	[Novel_Family]_{class}_Caudoviricetes	[Novel_Genus]_{class}_Caudoviricetes	Viruses	0.993	dsDNAphage	1	1	classified	VC09265	FALSE	TRUE	temperate
ma2024imeta	contig015893	contig015893	Duplodnaviria	Heunggongvirae	Uroviricota	Caudoviricetes	[Novel_Order]_{class}_Caudoviricetes	[Novel_Family]_{class}_Caudoviricetes	[Novel_Genus]_{class}_Caudoviricetes	Viruses	0.993	dsDNAphage	1	1	classified	VC67820	FALSE	TRUE	virulent
ma2024imeta	contig015894	contig015894	Duplodnaviria	Heunggongvirae	Uroviricota	Caudoviricetes	[Novel_Order]_{class}_Caudoviricetes	[Novel_Family]_{class}_Caudoviricetes	[Novel_Genus]_{class}_Caudoviricetes	Viruses	1	dsDNAphage	1	1	classified	VC68824	FALSE	TRUE	virulent
ma2024imeta	contig015900	contig015900	Monodnaviria	Sangervirae	Phixviricota	Malgrandaviricetes	Petitvirales	Microviridae	[Novel_Genus]_{family}_Microviridae	Viruses	0.993	dsDNAphage	1	1	classified	VC18357	FALSE	TRUE	virulent
ma2024imeta	contig015920	contig015920	Duplodnaviria	Heunggongvirae	Uroviricota	Caudoviricetes	[Novel_Order]_{class}_Caudoviricetes	[Novel_Family]_{class}_Caudoviricetes	[Novel_Genus]_{class}_Caudoviricetes	Viruses	0.987	dsDNAphage	1	2	classified	VC42995	FALSE	TRUE	temperate
ma2024imeta	contig015933	contig015933	Duplodnaviria	Heunggongvirae	Uroviricota	Caudoviricetes	[Novel_Order]_{class}_Caudoviricetes	[Novel_Family]_{class}_Caudoviricetes	[Novel_Genus]_{class}_Caudoviricetes	Viruses	0.98	dsDNAphage	1	1	classified	VC60255	FALSE	TRUE	virulent
ma2024imeta	contig015936	contig015936	Duplodnaviria	Heunggongvirae	Uroviricota	Caudoviricetes	[Novel_Order]_{class}_Caudoviricetes	[Novel_Family]_{class}_Caudoviricetes	[Novel_Genus]_{class}_Caudoviricetes	Viruses	0.993	dsDNAphage	1	1	classified	VC62091	FALSE	TRUE	virulent
ma2024imeta	contig016062	contig265428	Duplodnaviria	Heunggongvirae	Uroviricota	Caudoviricetes	[Novel_Order]_{class}_Caudoviricetes	[Novel_Family]_{class}_Caudoviricetes	[Novel_Genus]_{class}_Caudoviricetes	Viruses	0.993	dsDNAphage	1	3	classified	VC56168	FALSE	TRUE	temperate
ma2024imeta	contig016066	contig016066	Duplodnaviria	Heunggongvirae	Uroviricota	Caudoviricetes	[Novel_Order]_{class}_Caudoviricetes	[Novel_Family]_{class}_Caudoviricetes	[Novel_Genus]_{class}_Caudoviricetes	Viruses	0.987	dsDNAphage	1	3	classified	VC57918	FALSE	TRUE	virulent
ma2024imeta	contig016199	contig016199	Duplodnaviria	Heunggongvirae	Uroviricota	Caudoviricetes	[Novel_Order]_{class}_Caudoviricetes	[Novel_Family]_{class}_Caudoviricetes	[Novel_Genus]_{class}_Caudoviricetes	Viruses	0.98	dsDNAphage	1	1	classified	VC41219	FALSE	TRUE	temperate
ma2024imeta	contig016228	contig016228	Monodnaviria	Sangervirae	Phixviricota	Malgrandaviricetes	Petitvirales	Microviridae	[Novel_Genus]_{family}_Microviridae	Viruses	1	dsDNAphage	1	4	unclassified	VC77598	FALSE	FALSE	virulent
ma2024imeta	contig016315	contig016315	Duplodnaviria	Heunggongvirae	Uroviricota	Caudoviricetes	[Novel_Order]_{class}_Caudoviricetes	[Novel_Family]_{class}_Caudoviricetes	[Novel_Genus]_{class}_Caudoviricetes	Viruses	0.987	dsDNAphage	1	1	classified	VC41228	FALSE	TRUE	virulent
ma2024imeta	contig016343	contig016343	Duplodnaviria	Heunggongvirae	Uroviricota	Caudoviricetes	[Novel_Order]_{class}_Caudoviricetes	[Novel_Family]_{class}_Caudoviricetes	[Novel_Genus]_{class}_Caudoviricetes	Viruses	0.993	dsDNAphage	1	1	classified	VC63779	FALSE	TRUE	temperate
ma2024imeta	contig016390	contig016390	Duplodnaviria	Heunggongvirae	Uroviricota	Caudoviricetes	[Novel_Order]_{class}_Caudoviricetes	[Novel_Family]_{class}_Caudoviricetes	[Novel_Genus]_{class}_Caudoviricetes	Viruses	0.993	dsDNAphage	1	1	classified	VC20056	FALSE	TRUE	temperate
ma2024imeta	contig016392	contig016392	Duplodnaviria	Heunggongvirae	Uroviricota	Caudoviricetes	[Novel_Order]_{class}_Caudoviricetes	[Novel_Family]_{class}_Caudoviricetes	[Novel_Genus]_{class}_Caudoviricetes	Viruses	1	dsDNAphage	1	1	classified	VC46845	FALSE	TRUE	virulent
ma2024imeta	contig016395	contig016395	Duplodnaviria	Heunggongvirae	Uroviricota	Caudoviricetes	[Novel_Order]_{class}_Caudoviricetes	[Novel_Family]_{class}_Caudoviricetes	[Novel_Genus]_{class}_Caudoviricetes	Viruses	0.993	dsDNAphage	1	1	classified	VC19669	FALSE	TRUE	virulent
ma2024imeta	contig016405	contig230376	Duplodnaviria	Heunggongvirae	Uroviricota	Caudoviricetes	[Novel_Order]_{class}_Caudoviricetes	[Novel_Family]_{class}_Caudoviricetes	[Novel_Genus]_{class}_Caudoviricetes	Viruses	0.987	dsDNAphage	1	1	classified	VC34109	FALSE	TRUE	virulent
ma2024imeta	contig016412	contig016412	Duplodnaviria	Heunggongvirae	Uroviricota	Caudoviricetes	[Novel_Order]_{class}_Caudoviricetes	[Novel_Family]_{class}_Caudoviricetes	[Novel_Genus]_{class}_Caudoviricetes	Viruses	1	dsDNAphage	1	1	classified	VC29837	FALSE	TRUE	temperate
ma2024imeta	contig016413	contig016413	Duplodnaviria	Heunggongvirae	Uroviricota	Caudoviricetes	[Novel_Order]_{class}_Caudoviricetes	[Novel_Family]_{class}_Caudoviricetes	[Novel_Genus]_{class}_Caudoviricetes	Viruses	0.993	dsDNAphage	1	1	classified	VC40906	FALSE	TRUE	temperate
ma2024imeta	contig016532	contig016532	Duplodnaviria	Heunggongvirae	Uroviricota	Caudoviricetes	[Novel_Order]_{class}_Caudoviricetes	[Novel_Family]_{class}_Caudoviricetes	[Novel_Genus]_{class}_Caudoviricetes	Viruses	0.993	dsDNAphage	1	1	classified	VC59099	FALSE	TRUE	temperate
ma2024imeta	contig016735	contig016735	Duplodnaviria	Heunggongvirae	Uroviricota	Caudoviricetes	[Novel_Order]_{class}_Caudoviricetes	[Novel_Family]_{class}_Caudoviricetes	[Novel_Genus]_{class}_Caudoviricetes	Viruses	1	dsDNAphage	1	1	classified	VC60004	FALSE	TRUE	temperate
ma2024imeta	contig016754	contig016754	Duplodnaviria	Heunggongvirae	Uroviricota	Caudoviricetes	[Novel_Order]_{class}_Caudoviricetes	[Novel_Family]_{class}_Caudoviricetes	[Novel_Genus]_{class}_Caudoviricetes	Viruses	0.993	dsDNAphage	1	3	classified	VC20052	FALSE	TRUE	temperate
ma2024imeta	contig016845	contig016845	Duplodnaviria	Heunggongvirae	Uroviricota	Caudoviricetes	[Novel_Order]_{class}_Caudoviricetes	[Novel_Family]_{class}_Caudoviricetes	[Novel_Genus]_{class}_Caudoviricetes	Viruses	0.993	dsDNAphage	1	1	classified	VC24101	FALSE	TRUE	temperate
ma2024imeta	contig016847	contig016847	Duplodnaviria	Heunggongvirae	Uroviricota	Caudoviricetes	[Novel_Order]_{class}_Caudoviricetes	[Novel_Family]_{class}_Caudoviricetes	[Novel_Genus]_{class}_Caudoviricetes	Viruses	1	dsDNAphage	1	1	classified	VC46597	FALSE	TRUE	virulent
ma2024imeta	contig016848	contig016848	Duplodnaviria	Heunggongvirae	Uroviricota	Caudoviricetes	[Novel_Order]_{class}_Caudoviricetes	[Novel_Family]_{class}_Caudoviricetes	[Novel_Genus]_{class}_Caudoviricetes	Viruses	0.98	dsDNAphage	1	1	classified	VC52280	FALSE	TRUE	temperate
ma2024imeta	contig016849	contig016849	Duplodnaviria	Heunggongvirae	Uroviricota	Caudoviricetes	[Novel_Order]_{class}_Caudoviricetes	[Novel_Family]_{class}_Caudoviricetes	[Novel_Genus]_{class}_Caudoviricetes	Viruses	1	dsDNAphage	1	1	classified	VC27361	FALSE	TRUE	virulent
ma2024imeta	contig016850	contig016850	Duplodnaviria	Heunggongvirae	Uroviricota	Caudoviricetes	[Novel_Order]_{class}_Caudoviricetes	[Novel_Family]_{class}_Caudoviricetes	[Novel_Genus]_{class}_Caudoviricetes	Viruses	1	dsDNAphage	1	1	classified	VC59099	FALSE	TRUE	virulent
ma2024imeta	contig016852	contig016852	Duplodnaviria	Heunggongvirae	Uroviricota	Caudoviricetes	[Novel_Order]_{class}_Caudoviricetes	[Novel_Family]_{class}_Caudoviricetes	[Novel_Genus]_{class}_Caudoviricetes	Viruses	1	dsDNAphage	1	1	classified	VC59101	FALSE	TRUE	virulent
ma2024imeta	contig016853	contig016853	Duplodnaviria	Heunggongvirae	Uroviricota	Caudoviricetes	[Novel_Order]_{class}_Caudoviricetes	[Novel_Family]_{class}_Caudoviricetes	[Novel_Genus]_{class}_Caudoviricetes	Viruses	1	dsDNAphage	1	1	classified	VC45010	FALSE	TRUE	virulent
ma2024imeta	contig016856	contig016856	Monodnaviria	Sangervirae	Phixviricota	Malgrandaviricetes	Petitvirales	Microviridae	[Novel_Genus]_{family}_Microviridae	Viruses	0.993	dsDNAphage	1	1	unclassified	VC77599	FALSE	FALSE	virulent
ma2024imeta	contig016924	contig016924	Duplodnaviria	Heunggongvirae	Uroviricota	Caudoviricetes	[Novel_Order]_{class}_Caudoviricetes	[Novel_Family]_{class}_Caudoviricetes	[Novel_Genus]_{class}_Caudoviricetes	Viruses	1	dsDNAphage	1	1	classified	VC19927	FALSE	TRUE	virulent
ma2024imeta	contig016996	contig016996	Duplodnaviria	Heunggongvirae	Uroviricota	Caudoviricetes	[Novel_Order]_{class}_Caudoviricetes	[Novel_Family]_{class}_Caudoviricetes	[Novel_Genus]_{class}_Caudoviricetes	Viruses	1	dsDNAphage	1	1	classified	VC24873	FALSE	TRUE	temperate
ma2024imeta	contig017070	contig017070	Duplodnaviria	Heunggongvirae	Uroviricota	Caudoviricetes	[Novel_Order]_{class}_Caudoviricetes	[Novel_Family]_{class}_Caudoviricetes	[Novel_Genus]_{class}_Caudoviricetes	Viruses	1	dsDNAphage	1	3	classified	VC09240	FALSE	TRUE	temperate
ma2024imeta	contig017078	contig044157	Duplodnaviria	Heunggongvirae	Uroviricota	Caudoviricetes	[Novel_Order]_{class}_Caudoviricetes	[Novel_Family]_{class}_Caudoviricetes	[Novel_Genus]_{class}_Caudoviricetes	Viruses	0.993	dsDNAphage	1	1	classified	VC32005	FALSE	TRUE	virulent
ma2024imeta	contig017079	contig017079	Duplodnaviria	Heunggongvirae	Uroviricota	Caudoviricetes	[Novel_Order]_{class}_Caudoviricetes	[Novel_Family]_{class}_Caudoviricetes	[Novel_Genus]_{class}_Caudoviricetes	Viruses	0.993	dsDNAphage	1	1	classified	VC26156	FALSE	TRUE	temperate
ma2024imeta	contig017117	contig017117	Duplodnaviria	Heunggongvirae	Uroviricota	Caudoviricetes	[Novel_Order]_{class}_Caudoviricetes	[Novel_Family]_{class}_Caudoviricetes	[Novel_Genus]_{class}_Caudoviricetes	Viruses	1	dsDNAphage	1	4	classified	VC76641	FALSE	TRUE	virulent
ma2024imeta	contig017134	contig017134	Duplodnaviria	Heunggongvirae	Uroviricota	Caudoviricetes	[Novel_Order]_{class}_Caudoviricetes	[Novel_Family]_{class}_Caudoviricetes	[Novel_Genus]_{class}_Caudoviricetes	Viruses	0.987	dsDNAphage	1	4	classified	VC75408	FALSE	TRUE	virulent
ma2024imeta	contig017192	contig130253	Duplodnaviria	Heunggongvirae	Uroviricota	Caudoviricetes	[Novel_Order]_{class}_Caudoviricetes	[Novel_Family]_{class}_Caudoviricetes	[Novel_Genus]_{class}_Caudoviricetes	Viruses	1	dsDNAphage	1	1	classified	VC34057	FALSE	TRUE	virulent
ma2024imeta	contig017200	contig031846	Duplodnaviria	Heunggongvirae	Uroviricota	Caudoviricetes	[Novel_Order]_{class}_Caudoviricetes	[Novel_Family]_{class}_Caudoviricetes	[Novel_Genus]_{class}_Caudoviricetes	Viruses	1	dsDNAphage	1	3	classified	VC38457	FALSE	TRUE	temperate
ma2024imeta	contig017262	contig038394	Duplodnaviria	Heunggongvirae	Uroviricota	Caudoviricetes	[Novel_Order]_{class}_Caudoviricetes	[Novel_Family]_{class}_Caudoviricetes	[Novel_Genus]_{class}_Caudoviricetes	Viruses	0.993	dsDNAphage	1	1	classified	VC10441	FALSE	TRUE	temperate
ma2024imeta	contig017266	contig017520	Duplodnaviria	Heunggongvirae	Uroviricota	Caudoviricetes	[Novel_Order]_{class}_Caudoviricetes	[Novel_Family]_{class}_Caudoviricetes	[Novel_Genus]_{class}_Caudoviricetes	Viruses	1	dsDNAphage	1	1	classified	VC07749	FALSE	TRUE	virulent
ma2024imeta	contig017267	contig140783	Duplodnaviria	Heunggongvirae	Uroviricota	Caudoviricetes	[Novel_Order]_{class}_Caudoviricetes	[Novel_Family]_{class}_Caudoviricetes	[Novel_Genus]_{class}_Caudoviricetes	Viruses	1	dsDNAphage	1	1	classified	VC57189	FALSE	TRUE	virulent
ma2024imeta	contig017362	contig017362	Duplodnaviria	Heunggongvirae	Uroviricota	Caudoviricetes	[Novel_Order]_{class}_Caudoviricetes	[Novel_Family]_{class}_Caudoviricetes	[Novel_Genus]_{class}_Caudoviricetes	Viruses	1	dsDNAphage	1	1	classified	VC52869	FALSE	TRUE	virulent
ma2024imeta	contig017523	contig017523	Duplodnaviria	Heunggongvirae	Uroviricota	Caudoviricetes	[Novel_Order]_{class}_Caudoviricetes	[Novel_Family]_{class}_Caudoviricetes	[Novel_Genus]_{class}_Caudoviricetes	Viruses	1	dsDNAphage	1	1	classified	VC61951	FALSE	TRUE	virulent
ma2024imeta	contig017527	contig017527	Duplodnaviria	Heunggongvirae	Uroviricota	Caudoviricetes	Crassvirales	Suoliviridae	[Novel_Genus]_{family}_Suoliviridae	Viruses	1	dsDNAphage	1	1	classified	VC00370	FALSE	TRUE	virulent
ma2024imeta	contig017530	contig097395	Duplodnaviria	Heunggongvirae	Uroviricota	Caudoviricetes	[Novel_Order]_{class}_Caudoviricetes	[Novel_Family]_{class}_Caudoviricetes	[Novel_Genus]_{class}_Caudoviricetes	Viruses	1	dsDNAphage	1	1	classified	VC55997	FALSE	TRUE	virulent
ma2024imeta	contig017532	contig025219	Duplodnaviria	Heunggongvirae	Uroviricota	Caudoviricetes	[Novel_Order]_{class}_Caudoviricetes	[Novel_Family]_{class}_Caudoviricetes	[Novel_Genus]_{class}_Caudoviricetes	Viruses	0.993	dsDNAphage	1	1	classified	VC56750	FALSE	TRUE	virulent
ma2024imeta	contig017580	contig017580	Duplodnaviria	Heunggongvirae	Uroviricota	Caudoviricetes	[Novel_Order]_{class}_Caudoviricetes	[Novel_Family]_{class}_Caudoviricetes	[Novel_Genus]_{class}_Caudoviricetes	Viruses	0.987	dsDNAphage	1	4	classified	VC23695	FALSE	TRUE	temperate
ma2024imeta	contig017758	contig017758	Duplodnaviria	Heunggongvirae	Uroviricota	Caudoviricetes	[Novel_Order]_{class}_Caudoviricetes	[Novel_Family]_{class}_Caudoviricetes	[Novel_Genus]_{class}_Caudoviricetes	Viruses	1	dsDNAphage	1	2	classified	VC67025	FALSE	TRUE	temperate
ma2024imeta	contig017843	contig121960	Duplodnaviria	Heunggongvirae	Uroviricota	Caudoviricetes	[Novel_Order]_{class}_Caudoviricetes	[Novel_Family]_{class}_Caudoviricetes	[Novel_Genus]_{class}_Caudoviricetes	Viruses	0.993	dsDNAphage	1	1	classified	VC40925	FALSE	TRUE	temperate
ma2024imeta	contig017849	contig017849	Duplodnaviria	Heunggongvirae	Uroviricota	Caudoviricetes	[Novel_Order]_{class}_Caudoviricetes	[Novel_Family]_{class}_Caudoviricetes	[Novel_Genus]_{class}_Caudoviricetes	Viruses	0.993	dsDNAphage	1	2	classified	VC16810	FALSE	TRUE	virulent
ma2024imeta	contig017857	contig017857	Duplodnaviria	Heunggongvirae	Uroviricota	Caudoviricetes	[Novel_Order]_{class}_Caudoviricetes	[Novel_Family]_{class}_Caudoviricetes	[Novel_Genus]_{class}_Caudoviricetes	Viruses	1	dsDNAphage	1	1	classified	VC15339	FALSE	TRUE	virulent
ma2024imeta	contig017863	contig017863	Duplodnaviria	Heunggongvirae	Uroviricota	Caudoviricetes	Crassvirales	Suoliviridae	[Novel_Genus]_{family}_Suoliviridae	Viruses	1	dsDNAphage	1	1	classified	VC00365	FALSE	TRUE	virulent
ma2024imeta	contig017864	contig017864	Duplodnaviria	Heunggongvirae	Uroviricota	Caudoviricetes	[Novel_Order]_{class}_Caudoviricetes	[Novel_Family]_{class}_Caudoviricetes	[Novel_Genus]_{class}_Caudoviricetes	Viruses	1	dsDNAphage	1	1	classified	VC30440	FALSE	TRUE	virulent
ma2024imeta	contig017869	contig017869	Duplodnaviria	Heunggongvirae	Uroviricota	Caudoviricetes	[Novel_Order]_{class}_Caudoviricetes	[Novel_Family]_{class}_Caudoviricetes	[Novel_Genus]_{class}_Caudoviricetes	Viruses	0.98	dsDNAphage	1	1	classified	VC33363	FALSE	TRUE	temperate
ma2024imeta	contig017899	contig018214	Duplodnaviria	Heunggongvirae	Uroviricota	Caudoviricetes	[Novel_Order]_{class}_Caudoviricetes	[Novel_Family]_{class}_Caudoviricetes	[Novel_Genus]_{class}_Caudoviricetes	Viruses	1	dsDNAphage	1	3	classified	VC63779	FALSE	TRUE	temperate
ma2024imeta	contig017973	contig017973	Duplodnaviria	Heunggongvirae	Uroviricota	Caudoviricetes	[Novel_Order]_{class}_Caudoviricetes	[Novel_Family]_{class}_Caudoviricetes	[Novel_Genus]_{class}_Caudoviricetes	Viruses	0.993	dsDNAphage	1	1	classified	VC72307	FALSE	TRUE	virulent
ma2024imeta	contig018002	contig018002	Duplodnaviria	Heunggongvirae	Uroviricota	Caudoviricetes	[Novel_Order]_{class}_Caudoviricetes	[Novel_Family]_{class}_Caudoviricetes	[Novel_Genus]_{class}_Caudoviricetes	Viruses	1	dsDNAphage	1	4	classified	VC65350	FALSE	TRUE	virulent
ma2024imeta	contig018005	contig018005	Duplodnaviria	Heunggongvirae	Uroviricota	Caudoviricetes	[Novel_Order]_{class}_Caudoviricetes	[Novel_Family]_{class}_Caudoviricetes	[Novel_Genus]_{class}_Caudoviricetes	Viruses	1	dsDNAphage	1	1	classified	VC39660	FALSE	TRUE	temperate
ma2024imeta	contig018045	contig018045	Duplodnaviria	Heunggongvirae	Uroviricota	Caudoviricetes	[Novel_Order]_{class}_Caudoviricetes	[Novel_Family]_{class}_Caudoviricetes	[Novel_Genus]_{class}_Caudoviricetes	Viruses	1	dsDNAphage	1	2	classified	VC30789	FALSE	TRUE	temperate
ma2024imeta	contig018124	contig018124	Duplodnaviria	Heunggongvirae	Uroviricota	Caudoviricetes	[Novel_Order]_{class}_Caudoviricetes	[Novel_Family]_{class}_Caudoviricetes	[Novel_Genus]_{class}_Caudoviricetes	Viruses	1	dsDNAphage	1	3	classified	VC63145	FALSE	TRUE	temperate
ma2024imeta	contig018132	contig018132	Duplodnaviria	Heunggongvirae	Uroviricota	Caudoviricetes	[Novel_Order]_{class}_Caudoviricetes	[Novel_Family]_{class}_Caudoviricetes	[Novel_Genus]_{class}_Caudoviricetes	Viruses	0.98	dsDNAphage	1	4	classified	VC55983	FALSE	TRUE	temperate
ma2024imeta	contig018161	contig018161	Duplodnaviria	Heunggongvirae	Uroviricota	Caudoviricetes	[Novel_Order]_{class}_Caudoviricetes	[Novel_Family]_{class}_Caudoviricetes	[Novel_Genus]_{class}_Caudoviricetes	Viruses	0.993	dsDNAphage	1	1	classified	VC63784	FALSE	TRUE	temperate
ma2024imeta	contig018163	contig018163	Duplodnaviria	Heunggongvirae	Uroviricota	Caudoviricetes	[Novel_Order]_{class}_Caudoviricetes	[Novel_Family]_{class}_Caudoviricetes	[Novel_Genus]_{class}_Caudoviricetes	Viruses	0.993	dsDNAphage	1	1	classified	VC27825	FALSE	TRUE	temperate
ma2024imeta	contig018164	contig018164	Duplodnaviria	Heunggongvirae	Uroviricota	Caudoviricetes	[Novel_Order]_{class}_Caudoviricetes	[Novel_Family]_{class}_Caudoviricetes	[Novel_Genus]_{class}_Caudoviricetes	Viruses	0.993	dsDNAphage	1	1	classified	VC44315	FALSE	TRUE	virulent
ma2024imeta	contig018230	contig018230	Duplodnaviria	Heunggongvirae	Uroviricota	Caudoviricetes	[Novel_Order]_{class}_Caudoviricetes	[Novel_Family]_{class}_Caudoviricetes	[Novel_Genus]_{class}_Caudoviricetes	Viruses	1	dsDNAphage	1	2	classified	VC45091	FALSE	TRUE	temperate
ma2024imeta	contig018285	contig018285	Duplodnaviria	Heunggongvirae	Uroviricota	Caudoviricetes	[Novel_Order]_{class}_Caudoviricetes	[Novel_Family]_{class}_Caudoviricetes	[Novel_Genus]_{class}_Caudoviricetes	Viruses	0.987	dsDNAphage	1	1	classified	VC26213	FALSE	TRUE	temperate
ma2024imeta	contig018395	contig133768	Duplodnaviria	Heunggongvirae	Uroviricota	Caudoviricetes	[Novel_Order]_{class}_Caudoviricetes	[Novel_Family]_{class}_Caudoviricetes	[Novel_Genus]_{class}_Caudoviricetes	Viruses	0.993	dsDNAphage	1	1	classified	VC25927	FALSE	TRUE	temperate
ma2024imeta	contig018416	contig018416	Duplodnaviria	Heunggongvirae	Uroviricota	Caudoviricetes	[Novel_Order]_{class}_Caudoviricetes	[Novel_Family]_{class}_Caudoviricetes	[Novel_Genus]_{class}_Caudoviricetes	Viruses	0.987	dsDNAphage	1	3	classified	VC35718	FALSE	TRUE	temperate
ma2024imeta	contig018534	contig018534	Duplodnaviria	Heunggongvirae	Uroviricota	Caudoviricetes	[Novel_Order]_{class}_Caudoviricetes	[Novel_Family]_{class}_Caudoviricetes	[Novel_Genus]_{class}_Caudoviricetes	Viruses	0.98	dsDNAphage	1	1	classified	VC34795	FALSE	TRUE	temperate
ma2024imeta	contig018617	contig018617	Duplodnaviria	Heunggongvirae	Uroviricota	Caudoviricetes	[Novel_Order]_{class}_Caudoviricetes	[Novel_Family]_{class}_Caudoviricetes	[Novel_Genus]_{class}_Caudoviricetes	Viruses	1	dsDNAphage	1	1	classified	VC56157	FALSE	TRUE	temperate
ma2024imeta	contig018726	contig019229	Duplodnaviria	Heunggongvirae	Uroviricota	Caudoviricetes	[Novel_Order]_{class}_Caudoviricetes	[Novel_Family]_{class}_Caudoviricetes	[Novel_Genus]_{class}_Caudoviricetes	Viruses	1	dsDNAphage	1	3	classified	VC34057	FALSE	TRUE	virulent
ma2024imeta	contig018861	contig018861	Duplodnaviria	Heunggongvirae	Uroviricota	Caudoviricetes	[Novel_Order]_{class}_Caudoviricetes	[Novel_Family]_{class}_Caudoviricetes	[Novel_Genus]_{class}_Caudoviricetes	Viruses	0.967	dsDNAphage	1	1	classified	VC22088	FALSE	TRUE	temperate
ma2024imeta	contig018872	contig018872	Duplodnaviria	Heunggongvirae	Uroviricota	Caudoviricetes	[Novel_Order]_{class}_Caudoviricetes	[Novel_Family]_{class}_Caudoviricetes	[Novel_Genus]_{class}_Caudoviricetes	Viruses	1	dsDNAphage	1	1	classified	VC30744	FALSE	TRUE	temperate
ma2024imeta	contig018927	contig018927	Duplodnaviria	Heunggongvirae	Uroviricota	Caudoviricetes	[Novel_Order]_{class}_Caudoviricetes	[Novel_Family]_{class}_Caudoviricetes	[Novel_Genus]_{class}_Caudoviricetes	Viruses	1	dsDNAphage	1	2	classified	VC48138	FALSE	TRUE	temperate
ma2024imeta	contig019054	contig019054	Duplodnaviria	Heunggongvirae	Uroviricota	Caudoviricetes	[Novel_Order]_{class}_Caudoviricetes	[Novel_Family]_{class}_Caudoviricetes	[Novel_Genus]_{class}_Caudoviricetes	Viruses	1	dsDNAphage	1	1	classified	VC20225	FALSE	TRUE	temperate
ma2024imeta	contig019056	contig019056	Duplodnaviria	Heunggongvirae	Uroviricota	Caudoviricetes	[Novel_Order]_{class}_Caudoviricetes	[Novel_Family]_{class}_Caudoviricetes	[Novel_Genus]_{class}_Caudoviricetes	Viruses	0.987	dsDNAphage	1	1	classified	VC28214	FALSE	TRUE	temperate
ma2024imeta	contig019132	contig019132	Duplodnaviria	Heunggongvirae	Uroviricota	Caudoviricetes	[Novel_Order]_{class}_Caudoviricetes	[Novel_Family]_{class}_Caudoviricetes	[Novel_Genus]_{class}_Caudoviricetes	Viruses	1	dsDNAphage	1	2	classified	VC34274	FALSE	TRUE	temperate
ma2024imeta	contig019191	contig133947	Duplodnaviria	Heunggongvirae	Uroviricota	Caudoviricetes	[Novel_Order]_{class}_Caudoviricetes	[Novel_Family]_{class}_Caudoviricetes	[Novel_Genus]_{class}_Caudoviricetes	Viruses	0.993	dsDNAphage	1	2	classified	VC20776	FALSE	TRUE	virulent
ma2024imeta	contig019221	contig019364	Duplodnaviria	Heunggongvirae	Uroviricota	Caudoviricetes	[Novel_Order]_{class}_Caudoviricetes	[Novel_Family]_{class}_Caudoviricetes	[Novel_Genus]_{class}_Caudoviricetes	Viruses	0.993	dsDNAphage	1	2	classified	VC33973	FALSE	TRUE	temperate
ma2024imeta	contig019370	contig019370	Duplodnaviria	Heunggongvirae	Uroviricota	Caudoviricetes	[Novel_Order]_{class}_Caudoviricetes	[Novel_Family]_{class}_Caudoviricetes	[Novel_Genus]_{class}_Caudoviricetes	Viruses	0.993	dsDNAphage	1	3	classified	VC46737	FALSE	TRUE	temperate
ma2024imeta	contig019501	contig019501	Duplodnaviria	Heunggongvirae	Uroviricota	Caudoviricetes	[Unclassified_Order]_{family}_Peduoviridae	Peduoviridae	[Novel_Genus]_{family}_Peduoviridae	Viruses	0.993	dsDNAphage	1	1	classified	VC58568	TRUE	FALSE	temperate
ma2024imeta	contig019514	contig019514	Duplodnaviria	Heunggongvirae	Uroviricota	Caudoviricetes	[Novel_Order]_{class}_Caudoviricetes	[Novel_Family]_{class}_Caudoviricetes	[Novel_Genus]_{class}_Caudoviricetes	Viruses	0.947	dsDNAphage	1	1	classified	VC73650	TRUE	FALSE	temperate
ma2024imeta	contig019515	contig019515	Duplodnaviria	Heunggongvirae	Uroviricota	Caudoviricetes	[Novel_Order]_{class}_Caudoviricetes	[Novel_Family]_{class}_Caudoviricetes	[Novel_Genus]_{class}_Caudoviricetes	Viruses	0.993	dsDNAphage	1	1	classified	VC72233	TRUE	FALSE	virulent
ma2024imeta	contig019519	contig019519	Duplodnaviria	Heunggongvirae	Uroviricota	Caudoviricetes	[Unclassified_Order]_{genus}_Uetakevirus	[Unclassified_Family]_{genus}_Uetakevirus	Uetakevirus	Viruses	1	dsDNAphage	1	1	classified	VC69085	TRUE	FALSE	temperate
ma2024imeta	contig019521	contig019521	Duplodnaviria	Heunggongvirae	Uroviricota	Caudoviricetes	[Unclassified_Order]_{family}_Drexlerviridae	Drexlerviridae	[Novel_Genus]_{family}_Drexlerviridae	Viruses	1	dsDNAphage	1	1	classified	VC71867	TRUE	FALSE	virulent
ma2024imeta	contig019526	contig019526	Duplodnaviria	Heunggongvirae	Uroviricota	Caudoviricetes	[Novel_Order]_{class}_Caudoviricetes	[Novel_Family]_{class}_Caudoviricetes	[Novel_Genus]_{class}_Caudoviricetes	Viruses	1	dsDNAphage	1	1	classified	VC55533	FALSE	TRUE	temperate
ma2024imeta	contig019528	contig023638	Duplodnaviria	Heunggongvirae	Uroviricota	Caudoviricetes	[Novel_Order]_{class}_Caudoviricetes	[Novel_Family]_{class}_Caudoviricetes	[Novel_Genus]_{class}_Caudoviricetes	Viruses	0.987	dsDNAphage	1	1	classified	VC13698	FALSE	TRUE	virulent
ma2024imeta	contig019529	contig134209	Duplodnaviria	Heunggongvirae	Uroviricota	Caudoviricetes	[Novel_Order]_{class}_Caudoviricetes	[Novel_Family]_{class}_Caudoviricetes	[Novel_Genus]_{class}_Caudoviricetes	Viruses	1	dsDNAphage	1	3	classified	VC58568	TRUE	FALSE	temperate
ma2024imeta	contig019563	contig019563	Duplodnaviria	Heunggongvirae	Uroviricota	Caudoviricetes	[Novel_Order]_{class}_Caudoviricetes	[Novel_Family]_{class}_Caudoviricetes	[Novel_Genus]_{class}_Caudoviricetes	Viruses	0.993	dsDNAphage	1	1	classified	VC73644	FALSE	TRUE	temperate
ma2024imeta	contig019700	contig019700	Duplodnaviria	Heunggongvirae	Uroviricota	Caudoviricetes	[Unclassified_Order]_{family}_Demerecviridae	Demerecviridae	Tequintavirus	Viruses	1	dsDNAphage	1	1	classified	VC73813	TRUE	FALSE	virulent
ma2024imeta	contig019769	contig019769	Duplodnaviria	Heunggongvirae	Uroviricota	Caudoviricetes	[Unclassified_Order]_{family}_Peduoviridae	Peduoviridae	[Novel_Genus]_{family}_Peduoviridae	Viruses	1	dsDNAphage	1	3	classified	VC58509	TRUE	FALSE	temperate
ma2024imeta	contig019821	contig019821	Duplodnaviria	Heunggongvirae	Uroviricota	Caudoviricetes	[Novel_Order]_{class}_Caudoviricetes	[Novel_Family]_{class}_Caudoviricetes	[Novel_Genus]_{class}_Caudoviricetes	Viruses	1	dsDNAphage	1	3	classified	VC21773	FALSE	TRUE	virulent
ma2024imeta	contig019851	contig020815	Duplodnaviria	Heunggongvirae	Uroviricota	Caudoviricetes	[Novel_Order]_{class}_Caudoviricetes	[Novel_Family]_{class}_Caudoviricetes	[Novel_Genus]_{class}_Caudoviricetes	Viruses	0.993	dsDNAphage	1	1	classified	VC16765	FALSE	TRUE	virulent
ma2024imeta	contig019856	contig019856	Duplodnaviria	Heunggongvirae	Uroviricota	Caudoviricetes	[Novel_Order]_{class}_Caudoviricetes	[Novel_Family]_{class}_Caudoviricetes	[Novel_Genus]_{class}_Caudoviricetes	Viruses	1	dsDNAphage	1	2	classified	VC15275	FALSE	TRUE	virulent
ma2024imeta	contig019871	contig024809	Duplodnaviria	Heunggongvirae	Uroviricota	Caudoviricetes	[Novel_Order]_{class}_Caudoviricetes	[Novel_Family]_{class}_Caudoviricetes	[Novel_Genus]_{class}_Caudoviricetes	Viruses	1	dsDNAphage	1	1	classified	VC65348	FALSE	TRUE	virulent
ma2024imeta	contig019874	contig020896	Duplodnaviria	Heunggongvirae	Uroviricota	Caudoviricetes	[Novel_Order]_{class}_Caudoviricetes	[Novel_Family]_{class}_Caudoviricetes	[Novel_Genus]_{class}_Caudoviricetes	Viruses	0.993	dsDNAphage	1	1	classified	VC52223	FALSE	TRUE	temperate
ma2024imeta	contig019875	contig019875	Duplodnaviria	Heunggongvirae	Uroviricota	Caudoviricetes	[Novel_Order]_{class}_Caudoviricetes	[Novel_Family]_{class}_Caudoviricetes	[Novel_Genus]_{class}_Caudoviricetes	Viruses	0.993	dsDNAphage	1	1	classified	VC30995	FALSE	TRUE	temperate
ma2024imeta	contig019880	contig210591	Duplodnaviria	Heunggongvirae	Uroviricota	Caudoviricetes	[Novel_Order]_{class}_Caudoviricetes	[Novel_Family]_{class}_Caudoviricetes	[Novel_Genus]_{class}_Caudoviricetes	Viruses	1	dsDNAphage	1	1	classified	VC56730	FALSE	TRUE	virulent
ma2024imeta	contig019887	contig135285	Duplodnaviria	Heunggongvirae	Uroviricota	Caudoviricetes	[Novel_Order]_{class}_Caudoviricetes	[Novel_Family]_{class}_Caudoviricetes	[Novel_Genus]_{class}_Caudoviricetes	Viruses	1	dsDNAphage	1	1	classified	VC31421	FALSE	TRUE	temperate
ma2024imeta	contig019923	contig138912	Duplodnaviria	Heunggongvirae	Uroviricota	Caudoviricetes	[Novel_Order]_{class}_Caudoviricetes	[Novel_Family]_{class}_Caudoviricetes	[Novel_Genus]_{class}_Caudoviricetes	Viruses	0.987	dsDNAphage	1	1	classified	VC56546	FALSE	TRUE	temperate
ma2024imeta	contig019947	contig019947	Duplodnaviria	Heunggongvirae	Uroviricota	Caudoviricetes	[Novel_Order]_{class}_Caudoviricetes	[Novel_Family]_{class}_Caudoviricetes	[Novel_Genus]_{class}_Caudoviricetes	Viruses	0.98	dsDNAphage	1	1	classified	VC34340	FALSE	TRUE	temperate
ma2024imeta	contig019952	contig019952	Duplodnaviria	Heunggongvirae	Uroviricota	Caudoviricetes	[Novel_Order]_{class}_Caudoviricetes	[Novel_Family]_{class}_Caudoviricetes	[Novel_Genus]_{class}_Caudoviricetes	Viruses	1	dsDNAphage	1	3	classified	VC62437	FALSE	TRUE	temperate
ma2024imeta	contig019979	contig290916	Duplodnaviria	Heunggongvirae	Uroviricota	Caudoviricetes	[Novel_Order]_{class}_Caudoviricetes	[Novel_Family]_{class}_Caudoviricetes	[Novel_Genus]_{class}_Caudoviricetes	Viruses	1	dsDNAphage	1	1	classified	VC57189	FALSE	TRUE	virulent
ma2024imeta	contig019996	contig019996	Duplodnaviria	Heunggongvirae	Uroviricota	Caudoviricetes	[Novel_Order]_{class}_Caudoviricetes	[Novel_Family]_{class}_Caudoviricetes	[Novel_Genus]_{class}_Caudoviricetes	Viruses	0.987	dsDNAphage	1	1	classified	VC38027	FALSE	TRUE	temperate
ma2024imeta	contig019999	contig300524	Duplodnaviria	Heunggongvirae	Uroviricota	Caudoviricetes	[Novel_Order]_{class}_Caudoviricetes	[Novel_Family]_{class}_Caudoviricetes	[Novel_Genus]_{class}_Caudoviricetes	Viruses	1	dsDNAphage	1	1	classified	VC57596	FALSE	TRUE	virulent
ma2024imeta	contig020001	contig027543	Duplodnaviria	Heunggongvirae	Uroviricota	Caudoviricetes	[Novel_Order]_{class}_Caudoviricetes	[Novel_Family]_{class}_Caudoviricetes	[Novel_Genus]_{class}_Caudoviricetes	Viruses	1	dsDNAphage	1	1	classified	VC57589	FALSE	TRUE	virulent
ma2024imeta	contig020003	contig020003	Duplodnaviria	Heunggongvirae	Uroviricota	Caudoviricetes	[Novel_Order]_{class}_Caudoviricetes	[Novel_Family]_{class}_Caudoviricetes	[Novel_Genus]_{class}_Caudoviricetes	Viruses	0.987	dsDNAphage	1	1	classified	VC56866	FALSE	TRUE	temperate
ma2024imeta	contig020035	contig020035	Duplodnaviria	Heunggongvirae	Uroviricota	Caudoviricetes	[Novel_Order]_{class}_Caudoviricetes	[Novel_Family]_{class}_Caudoviricetes	[Novel_Genus]_{class}_Caudoviricetes	Viruses	0.907	dsDNAphage	1	2	classified	VC12042	FALSE	TRUE	temperate
ma2024imeta	contig020037	contig028955	Duplodnaviria	Heunggongvirae	Uroviricota	Caudoviricetes	[Novel_Order]_{class}_Caudoviricetes	[Novel_Family]_{class}_Caudoviricetes	[Novel_Genus]_{class}_Caudoviricetes	Viruses	1	dsDNAphage	1	1	classified	VC33363	FALSE	TRUE	temperate
ma2024imeta	contig020126	contig022331	Duplodnaviria	Heunggongvirae	Uroviricota	Caudoviricetes	[Novel_Order]_{class}_Caudoviricetes	[Novel_Family]_{class}_Caudoviricetes	[Novel_Genus]_{class}_Caudoviricetes	Viruses	0.96	dsDNAphage	1	1	classified	VC31587	FALSE	TRUE	temperate
ma2024imeta	contig020128	contig020658	Duplodnaviria	Heunggongvirae	Uroviricota	Caudoviricetes	[Novel_Order]_{class}_Caudoviricetes	[Novel_Family]_{class}_Caudoviricetes	[Novel_Genus]_{class}_Caudoviricetes	Viruses	1	dsDNAphage	1	1	classified	VC34057	FALSE	TRUE	virulent
ma2024imeta	contig020130	contig022857	Duplodnaviria	Heunggongvirae	Uroviricota	Caudoviricetes	[Novel_Order]_{class}_Caudoviricetes	[Novel_Family]_{class}_Caudoviricetes	[Novel_Genus]_{class}_Caudoviricetes	Viruses	0.993	dsDNAphage	1	1	classified	VC31587	FALSE	TRUE	temperate
ma2024imeta	contig020133	contig020133	Duplodnaviria	Heunggongvirae	Uroviricota	Caudoviricetes	[Novel_Order]_{class}_Caudoviricetes	[Novel_Family]_{class}_Caudoviricetes	[Novel_Genus]_{class}_Caudoviricetes	Viruses	0.993	dsDNAphage	1	3	classified	VC33294	FALSE	TRUE	temperate
ma2024imeta	contig020142	contig071478	Duplodnaviria	Heunggongvirae	Uroviricota	Caudoviricetes	[Novel_Order]_{class}_Caudoviricetes	[Novel_Family]_{class}_Caudoviricetes	[Novel_Genus]_{class}_Caudoviricetes	Viruses	1	dsDNAphage	1	1	classified	VC00420	FALSE	TRUE	virulent
ma2024imeta	contig020144	contig020144	Duplodnaviria	Heunggongvirae	Uroviricota	Caudoviricetes	[Novel_Order]_{class}_Caudoviricetes	[Novel_Family]_{class}_Caudoviricetes	[Novel_Genus]_{class}_Caudoviricetes	Viruses	0.98	dsDNAphage	1	1	classified	VC30994	FALSE	TRUE	temperate
ma2024imeta	contig020217	contig025713	Duplodnaviria	Heunggongvirae	Uroviricota	Caudoviricetes	[Novel_Order]_{class}_Caudoviricetes	[Novel_Family]_{class}_Caudoviricetes	[Novel_Genus]_{class}_Caudoviricetes	Viruses	1	dsDNAphage	1	1	classified	VC62324	FALSE	TRUE	virulent
ma2024imeta	contig020243	contig020357	Duplodnaviria	Heunggongvirae	Uroviricota	Caudoviricetes	[Novel_Order]_{class}_Caudoviricetes	[Novel_Family]_{class}_Caudoviricetes	[Novel_Genus]_{class}_Caudoviricetes	Viruses	0.993	dsDNAphage	1	1	classified	VC33292	FALSE	TRUE	temperate
ma2024imeta	contig020250	contig020250	Duplodnaviria	Heunggongvirae	Uroviricota	Caudoviricetes	[Novel_Order]_{class}_Caudoviricetes	[Novel_Family]_{class}_Caudoviricetes	[Novel_Genus]_{class}_Caudoviricetes	Viruses	1	dsDNAphage	1	1	classified	VC14613	FALSE	TRUE	virulent
ma2024imeta	contig020251	contig020251	Duplodnaviria	Heunggongvirae	Uroviricota	Caudoviricetes	[Novel_Order]_{class}_Caudoviricetes	[Novel_Family]_{class}_Caudoviricetes	[Novel_Genus]_{class}_Caudoviricetes	Viruses	1	dsDNAphage	1	1	classified	VC49104	FALSE	TRUE	virulent
ma2024imeta	contig020253	contig020253	Duplodnaviria	Heunggongvirae	Uroviricota	Caudoviricetes	[Novel_Order]_{class}_Caudoviricetes	[Novel_Family]_{class}_Caudoviricetes	[Novel_Genus]_{class}_Caudoviricetes	Viruses	0.973	dsDNAphage	1	1	classified	VC25996	FALSE	TRUE	temperate
ma2024imeta	contig020254	contig020254	Duplodnaviria	Heunggongvirae	Uroviricota	Caudoviricetes	[Novel_Order]_{class}_Caudoviricetes	[Novel_Family]_{class}_Caudoviricetes	[Novel_Genus]_{class}_Caudoviricetes	Viruses	1	dsDNAphage	1	1	classified	VC61347	FALSE	TRUE	temperate
ma2024imeta	contig020268	contig020268	Duplodnaviria	Heunggongvirae	Uroviricota	Caudoviricetes	[Novel_Order]_{class}_Caudoviricetes	[Novel_Family]_{class}_Caudoviricetes	[Novel_Genus]_{class}_Caudoviricetes	Viruses	0.987	dsDNAphage	1	1	classified	VC62057	FALSE	TRUE	virulent
ma2024imeta	contig020278	contig135224	Duplodnaviria	Heunggongvirae	Uroviricota	Caudoviricetes	[Novel_Order]_{class}_Caudoviricetes	[Novel_Family]_{class}_Caudoviricetes	[Novel_Genus]_{class}_Caudoviricetes	Viruses	1	dsDNAphage	1	3	classified	VC24762	FALSE	TRUE	temperate
ma2024imeta	contig020290	contig255021	Duplodnaviria	Heunggongvirae	Uroviricota	Caudoviricetes	[Novel_Order]_{class}_Caudoviricetes	[Novel_Family]_{class}_Caudoviricetes	[Novel_Genus]_{class}_Caudoviricetes	Viruses	0.993	dsDNAphage	1	1	classified	VC11396	FALSE	TRUE	temperate
ma2024imeta	contig020296	contig020296	Duplodnaviria	Heunggongvirae	Uroviricota	Caudoviricetes	[Novel_Order]_{class}_Caudoviricetes	[Novel_Family]_{class}_Caudoviricetes	[Novel_Genus]_{class}_Caudoviricetes	Viruses	0.96	dsDNAphage	1	3	classified	VC37119	FALSE	TRUE	temperate
ma2024imeta	contig020300	contig134408	Duplodnaviria	Heunggongvirae	Uroviricota	Caudoviricetes	[Novel_Order]_{class}_Caudoviricetes	[Novel_Family]_{class}_Caudoviricetes	[Novel_Genus]_{class}_Caudoviricetes	Viruses	1	dsDNAphage	1	1	classified	VC61571	FALSE	TRUE	virulent
ma2024imeta	contig020313	contig020313	Duplodnaviria	Heunggongvirae	Uroviricota	Caudoviricetes	[Novel_Order]_{class}_Caudoviricetes	[Novel_Family]_{class}_Caudoviricetes	[Novel_Genus]_{class}_Caudoviricetes	Viruses	1	dsDNAphage	1	2	classified	VC34237	FALSE	TRUE	temperate
ma2024imeta	contig020458	contig129023	Duplodnaviria	Heunggongvirae	Uroviricota	Caudoviricetes	[Novel_Order]_{class}_Caudoviricetes	[Novel_Family]_{class}_Caudoviricetes	[Novel_Genus]_{class}_Caudoviricetes	Viruses	1	dsDNAphage	1	1	classified	VC56750	FALSE	TRUE	virulent
ma2024imeta	contig020558	contig025975	Duplodnaviria	Heunggongvirae	Uroviricota	Caudoviricetes	[Novel_Order]_{class}_Caudoviricetes	[Novel_Family]_{class}_Caudoviricetes	[Novel_Genus]_{class}_Caudoviricetes	Viruses	1	dsDNAphage	1	1	classified	VC57596	FALSE	TRUE	virulent
ma2024imeta	contig020670	contig025642	Duplodnaviria	Heunggongvirae	Uroviricota	Caudoviricetes	[Novel_Order]_{class}_Caudoviricetes	[Novel_Family]_{class}_Caudoviricetes	[Novel_Genus]_{class}_Caudoviricetes	Viruses	1	dsDNAphage	1	1	classified	VC33671	FALSE	TRUE	temperate
ma2024imeta	contig020810	contig020619	Duplodnaviria	Heunggongvirae	Uroviricota	Caudoviricetes	[Novel_Order]_{class}_Caudoviricetes	[Novel_Family]_{class}_Caudoviricetes	[Novel_Genus]_{class}_Caudoviricetes	Viruses	0.987	dsDNAphage	1	1	classified	VC13066	FALSE	TRUE	temperate
ma2024imeta	contig020976	contig126901	Duplodnaviria	Heunggongvirae	Uroviricota	Caudoviricetes	[Novel_Order]_{class}_Caudoviricetes	[Novel_Family]_{class}_Caudoviricetes	[Novel_Genus]_{class}_Caudoviricetes	Viruses	0.987	dsDNAphage	1	1	classified	VC33647	FALSE	TRUE	temperate
ma2024imeta	contig021005	contig021005	Duplodnaviria	Heunggongvirae	Uroviricota	Caudoviricetes	[Novel_Order]_{class}_Caudoviricetes	[Novel_Family]_{class}_Caudoviricetes	[Novel_Genus]_{class}_Caudoviricetes	Viruses	1	dsDNAphage	1	2	classified	VC53428	FALSE	TRUE	temperate
ma2024imeta	contig021082	contig212186	Duplodnaviria	Heunggongvirae	Uroviricota	Caudoviricetes	[Novel_Order]_{class}_Caudoviricetes	[Novel_Family]_{class}_Caudoviricetes	[Novel_Genus]_{class}_Caudoviricetes	Viruses	1	dsDNAphage	1	1	classified	VC57602	FALSE	TRUE	temperate
ma2024imeta	contig021114	contig021114	Duplodnaviria	Heunggongvirae	Uroviricota	Caudoviricetes	[Novel_Order]_{class}_Caudoviricetes	[Novel_Family]_{class}_Caudoviricetes	[Novel_Genus]_{class}_Caudoviricetes	Viruses	1	dsDNAphage	1	1	classified	VC33452	FALSE	TRUE	temperate
ma2024imeta	contig021115	contig021115	Duplodnaviria	Heunggongvirae	Uroviricota	Caudoviricetes	[Novel_Order]_{class}_Caudoviricetes	[Novel_Family]_{class}_Caudoviricetes	[Novel_Genus]_{class}_Caudoviricetes	Viruses	0.987	dsDNAphage	1	1	classified	VC33363	FALSE	TRUE	temperate
ma2024imeta	contig021119	contig023200	Duplodnaviria	Heunggongvirae	Uroviricota	Caudoviricetes	[Novel_Order]_{class}_Caudoviricetes	[Novel_Family]_{class}_Caudoviricetes	[Novel_Genus]_{class}_Caudoviricetes	Viruses	0.987	dsDNAphage	1	1	classified	VC15253	FALSE	TRUE	temperate
ma2024imeta	contig021124	contig107430	Duplodnaviria	Heunggongvirae	Uroviricota	Caudoviricetes	[Novel_Order]_{class}_Caudoviricetes	[Novel_Family]_{class}_Caudoviricetes	[Novel_Genus]_{class}_Caudoviricetes	Viruses	1	dsDNAphage	1	1	classified	VC00353	FALSE	TRUE	virulent
ma2024imeta	contig021166	contig026624	Duplodnaviria	Heunggongvirae	Uroviricota	Caudoviricetes	[Novel_Order]_{class}_Caudoviricetes	[Novel_Family]_{class}_Caudoviricetes	[Novel_Genus]_{class}_Caudoviricetes	Viruses	1	dsDNAphage	1	1	classified	VC17321	FALSE	TRUE	virulent
ma2024imeta	contig021185	contig021185	Duplodnaviria	Heunggongvirae	Uroviricota	Caudoviricetes	[Novel_Order]_{class}_Caudoviricetes	[Novel_Family]_{class}_Caudoviricetes	[Novel_Genus]_{class}_Caudoviricetes	Viruses	0.993	dsDNAphage	1	4	classified	VC41114	FALSE	TRUE	temperate
ma2024imeta	contig021575	contig021575	Duplodnaviria	Heunggongvirae	Uroviricota	Caudoviricetes	[Novel_Order]_{class}_Caudoviricetes	[Novel_Family]_{class}_Caudoviricetes	[Novel_Genus]_{class}_Caudoviricetes	Viruses	0.993	dsDNAphage	1	1	classified	VC70552	FALSE	TRUE	virulent
ma2024imeta	contig021578	contig021578	Duplodnaviria	Heunggongvirae	Uroviricota	Caudoviricetes	[Novel_Order]_{class}_Caudoviricetes	[Novel_Family]_{class}_Caudoviricetes	[Novel_Genus]_{class}_Caudoviricetes	Viruses	1	dsDNAphage	1	1	classified	VC21217	FALSE	TRUE	virulent
ma2024imeta	contig021579	contig021579	Duplodnaviria	Heunggongvirae	Uroviricota	Caudoviricetes	[Novel_Order]_{class}_Caudoviricetes	[Novel_Family]_{class}_Caudoviricetes	[Novel_Genus]_{class}_Caudoviricetes	Viruses	1	dsDNAphage	1	1	classified	VC32908	FALSE	TRUE	virulent
ma2024imeta	contig021819	contig021819	Duplodnaviria	Heunggongvirae	Uroviricota	Caudoviricetes	[Novel_Order]_{class}_Caudoviricetes	[Novel_Family]_{class}_Caudoviricetes	[Novel_Genus]_{class}_Caudoviricetes	Viruses	0.993	dsDNAphage	1	1	classified	VC11807	FALSE	TRUE	temperate
ma2024imeta	contig021820	contig028484	Duplodnaviria	Heunggongvirae	Uroviricota	Caudoviricetes	[Novel_Order]_{class}_Caudoviricetes	[Novel_Family]_{class}_Caudoviricetes	[Novel_Genus]_{class}_Caudoviricetes	Viruses	1	dsDNAphage	1	1	classified	VC40695	FALSE	TRUE	virulent
ma2024imeta	contig021823	contig021879	Duplodnaviria	Heunggongvirae	Uroviricota	Caudoviricetes	[Novel_Order]_{class}_Caudoviricetes	[Novel_Family]_{class}_Caudoviricetes	[Novel_Genus]_{class}_Caudoviricetes	Viruses	0.993	dsDNAphage	1	1	classified	VC56731	FALSE	TRUE	virulent
ma2024imeta	contig021850	contig021850	Duplodnaviria	Heunggongvirae	Uroviricota	Caudoviricetes	[Novel_Order]_{class}_Caudoviricetes	[Novel_Family]_{class}_Caudoviricetes	[Novel_Genus]_{class}_Caudoviricetes	Viruses	0.973	dsDNAphage	1	1	classified	VC38839	FALSE	TRUE	temperate
ma2024imeta	contig021909	contig134540	Duplodnaviria	Heunggongvirae	Uroviricota	Caudoviricetes	[Novel_Order]_{class}_Caudoviricetes	[Novel_Family]_{class}_Caudoviricetes	[Novel_Genus]_{class}_Caudoviricetes	Viruses	0.98	dsDNAphage	1	2	classified	VC34934	FALSE	TRUE	temperate
ma2024imeta	contig021984	contig028853	Duplodnaviria	Heunggongvirae	Uroviricota	Caudoviricetes	[Novel_Order]_{class}_Caudoviricetes	[Novel_Family]_{class}_Caudoviricetes	[Novel_Genus]_{class}_Caudoviricetes	Viruses	1	dsDNAphage	1	2	classified	VC26368	FALSE	TRUE	temperate
ma2024imeta	contig022214	contig022072	Duplodnaviria	Heunggongvirae	Uroviricota	Caudoviricetes	[Novel_Order]_{class}_Caudoviricetes	[Novel_Family]_{class}_Caudoviricetes	[Novel_Genus]_{class}_Caudoviricetes	Viruses	0.973	dsDNAphage	1	1	classified	VC26022	FALSE	TRUE	temperate
ma2024imeta	contig022335	contig134499	Duplodnaviria	Heunggongvirae	Uroviricota	Caudoviricetes	[Novel_Order]_{class}_Caudoviricetes	[Novel_Family]_{class}_Caudoviricetes	[Novel_Genus]_{class}_Caudoviricetes	Viruses	0.993	dsDNAphage	1	4	classified	VC25369	FALSE	TRUE	temperate
ma2024imeta	contig022404	contig026537	Duplodnaviria	Heunggongvirae	Uroviricota	Caudoviricetes	[Novel_Order]_{class}_Caudoviricetes	[Novel_Family]_{class}_Caudoviricetes	[Novel_Genus]_{class}_Caudoviricetes	Viruses	1	dsDNAphage	1	1	classified	VC64617	FALSE	TRUE	temperate
ma2024imeta	contig022405	contig022405	Duplodnaviria	Heunggongvirae	Uroviricota	Caudoviricetes	[Novel_Order]_{class}_Caudoviricetes	[Novel_Family]_{class}_Caudoviricetes	[Novel_Genus]_{class}_Caudoviricetes	Viruses	0.993	dsDNAphage	1	1	classified	VC56635	FALSE	TRUE	temperate
ma2024imeta	contig022581	contig022581	Duplodnaviria	Heunggongvirae	Uroviricota	Caudoviricetes	[Novel_Order]_{class}_Caudoviricetes	[Novel_Family]_{class}_Caudoviricetes	[Novel_Genus]_{class}_Caudoviricetes	Viruses	0.96	dsDNAphage	1	2	classified	VC43517	FALSE	TRUE	temperate
ma2024imeta	contig022659	contig022659	Duplodnaviria	Heunggongvirae	Uroviricota	Caudoviricetes	[Novel_Order]_{class}_Caudoviricetes	[Novel_Family]_{class}_Caudoviricetes	[Novel_Genus]_{class}_Caudoviricetes	Viruses	0.993	dsDNAphage	1	1	classified	VC56769	FALSE	TRUE	temperate
ma2024imeta	contig022891	contig022891	Duplodnaviria	Heunggongvirae	Uroviricota	Caudoviricetes	[Novel_Order]_{class}_Caudoviricetes	[Novel_Family]_{class}_Caudoviricetes	[Novel_Genus]_{class}_Caudoviricetes	Viruses	0.973	dsDNAphage	1	3	classified	VC34057	FALSE	TRUE	virulent
ma2024imeta	contig022946	contig135142	Duplodnaviria	Heunggongvirae	Uroviricota	Caudoviricetes	[Novel_Order]_{class}_Caudoviricetes	[Novel_Family]_{class}_Caudoviricetes	[Novel_Genus]_{class}_Caudoviricetes	Viruses	0.993	dsDNAphage	1	4	classified	VC43526	FALSE	TRUE	temperate
ma2024imeta	contig023202	contig023202	Duplodnaviria	Heunggongvirae	Uroviricota	Caudoviricetes	[Novel_Order]_{class}_Caudoviricetes	[Novel_Family]_{class}_Caudoviricetes	[Novel_Genus]_{class}_Caudoviricetes	Viruses	1	dsDNAphage	1	1	classified	VC56662	FALSE	TRUE	virulent
ma2024imeta	contig023481	contig023481	Duplodnaviria	Heunggongvirae	Uroviricota	Caudoviricetes	[Unclassified_Order]_{family}_Schitoviridae	Schitoviridae	Gamaleyavirus	Viruses	1	dsDNAphage	1	1	classified	VC67095	TRUE	FALSE	virulent
ma2024imeta	contig023490	contig023795	Duplodnaviria	Heunggongvirae	Uroviricota	Caudoviricetes	[Novel_Order]_{class}_Caudoviricetes	[Novel_Family]_{class}_Caudoviricetes	[Novel_Genus]_{class}_Caudoviricetes	Viruses	0.987	dsDNAphage	1	4	classified	VC58552	FALSE	TRUE	temperate
ma2024imeta	contig023644	contig023644	Duplodnaviria	Heunggongvirae	Uroviricota	Caudoviricetes	[Unclassified_Order]_{family}_Peduoviridae	Peduoviridae	[Novel_Genus]_{family}_Peduoviridae	Viruses	0.98	dsDNAphage	1	3	classified	VC58568	TRUE	FALSE	temperate
ma2024imeta	contig024057	contig024057	Duplodnaviria	Heunggongvirae	Uroviricota	Caudoviricetes	[Novel_Order]_{class}_Caudoviricetes	[Novel_Family]_{class}_Caudoviricetes	[Novel_Genus]_{class}_Caudoviricetes	Viruses	0.953	dsDNAphage	1	1	classified	VC73650	TRUE	FALSE	temperate
ma2024imeta	contig024141	contig024141	Duplodnaviria	Heunggongvirae	Uroviricota	Caudoviricetes	[Novel_Order]_{class}_Caudoviricetes	[Novel_Family]_{class}_Caudoviricetes	[Novel_Genus]_{class}_Caudoviricetes	Viruses	0.987	dsDNAphage	1	1	classified	VC30785	FALSE	TRUE	temperate
ma2024imeta	contig024194	contig024194	Duplodnaviria	Heunggongvirae	Uroviricota	Caudoviricetes	[Novel_Order]_{class}_Caudoviricetes	[Novel_Family]_{class}_Caudoviricetes	[Novel_Genus]_{class}_Caudoviricetes	Viruses	1	dsDNAphage	1	1	classified	VC23039	FALSE	TRUE	temperate
ma2024imeta	contig024198	contig024198	Duplodnaviria	Heunggongvirae	Uroviricota	Caudoviricetes	[Novel_Order]_{class}_Caudoviricetes	[Novel_Family]_{class}_Caudoviricetes	[Novel_Genus]_{class}_Caudoviricetes	Viruses	0.987	dsDNAphage	1	1	classified	VC31959	FALSE	TRUE	temperate
ma2024imeta	contig024377	contig024377	Duplodnaviria	Heunggongvirae	Uroviricota	Caudoviricetes	[Novel_Order]_{class}_Caudoviricetes	[Novel_Family]_{class}_Caudoviricetes	[Novel_Genus]_{class}_Caudoviricetes	Viruses	0.993	dsDNAphage	1	1	classified	VC30209	FALSE	TRUE	temperate
ma2024imeta	contig024536	contig024536	Duplodnaviria	Heunggongvirae	Uroviricota	Caudoviricetes	[Novel_Order]_{class}_Caudoviricetes	[Novel_Family]_{class}_Caudoviricetes	[Novel_Genus]_{class}_Caudoviricetes	Viruses	0.98	dsDNAphage	1	2	classified	VC58040	FALSE	TRUE	virulent
ma2024imeta	contig024676	contig280080	Duplodnaviria	Heunggongvirae	Uroviricota	Caudoviricetes	[Novel_Order]_{class}_Caudoviricetes	[Novel_Family]_{class}_Caudoviricetes	[Novel_Genus]_{class}_Caudoviricetes	Viruses	0.993	dsDNAphage	1	2	classified	VC12080	FALSE	TRUE	virulent
ma2024imeta	contig024680	contig024680	Duplodnaviria	Heunggongvirae	Uroviricota	Caudoviricetes	[Novel_Order]_{class}_Caudoviricetes	[Novel_Family]_{class}_Caudoviricetes	[Novel_Genus]_{class}_Caudoviricetes	Viruses	1	dsDNAphage	1	1	classified	VC07149	FALSE	TRUE	temperate
ma2024imeta	contig024784	contig169930	Duplodnaviria	Heunggongvirae	Uroviricota	Caudoviricetes	[Novel_Order]_{class}_Caudoviricetes	[Novel_Family]_{class}_Caudoviricetes	[Novel_Genus]_{class}_Caudoviricetes	Viruses	0.993	dsDNAphage	1	1	classified	VC56769	FALSE	TRUE	temperate
ma2024imeta	contig024814	contig024814	Duplodnaviria	Heunggongvirae	Uroviricota	Caudoviricetes	[Novel_Order]_{class}_Caudoviricetes	[Novel_Family]_{class}_Caudoviricetes	[Novel_Genus]_{class}_Caudoviricetes	Viruses	1	dsDNAphage	1	1	classified	VC64552	FALSE	TRUE	virulent
ma2024imeta	contig024823	contig024823	Duplodnaviria	Heunggongvirae	Uroviricota	Caudoviricetes	[Novel_Order]_{class}_Caudoviricetes	[Novel_Family]_{class}_Caudoviricetes	[Novel_Genus]_{class}_Caudoviricetes	Viruses	1	dsDNAphage	1	2	classified	VC43760	FALSE	TRUE	temperate
ma2024imeta	contig024902	contig025430	Duplodnaviria	Heunggongvirae	Uroviricota	Caudoviricetes	[Novel_Order]_{class}_Caudoviricetes	[Novel_Family]_{class}_Caudoviricetes	[Novel_Genus]_{class}_Caudoviricetes	Viruses	1	dsDNAphage	1	3	classified	VC14800	FALSE	TRUE	temperate
ma2024imeta	contig024910	contig147309	Duplodnaviria	Heunggongvirae	Uroviricota	Caudoviricetes	[Novel_Order]_{class}_Caudoviricetes	[Novel_Family]_{class}_Caudoviricetes	[Novel_Genus]_{class}_Caudoviricetes	Viruses	0.993	dsDNAphage	1	1	classified	VC56769	FALSE	TRUE	temperate
ma2024imeta	contig025022	contig025022	Duplodnaviria	Heunggongvirae	Uroviricota	Caudoviricetes	[Novel_Order]_{class}_Caudoviricetes	[Novel_Family]_{class}_Caudoviricetes	[Novel_Genus]_{class}_Caudoviricetes	Viruses	1	dsDNAphage	1	1	classified	VC56731	FALSE	TRUE	virulent
ma2024imeta	contig025061	contig025633	Duplodnaviria	Heunggongvirae	Uroviricota	Caudoviricetes	[Novel_Order]_{class}_Caudoviricetes	[Novel_Family]_{class}_Caudoviricetes	[Novel_Genus]_{class}_Caudoviricetes	Viruses	1	dsDNAphage	1	1	classified	VC30275	FALSE	TRUE	temperate
ma2024imeta	contig025112	contig025662	Duplodnaviria	Heunggongvirae	Uroviricota	Caudoviricetes	[Novel_Order]_{class}_Caudoviricetes	[Novel_Family]_{class}_Caudoviricetes	[Novel_Genus]_{class}_Caudoviricetes	Viruses	1	dsDNAphage	1	1	classified	VC15797	FALSE	TRUE	virulent
ma2024imeta	contig025524	contig025524	Duplodnaviria	Heunggongvirae	Uroviricota	Caudoviricetes	[Novel_Order]_{class}_Caudoviricetes	[Novel_Family]_{class}_Caudoviricetes	[Novel_Genus]_{class}_Caudoviricetes	Viruses	0.973	dsDNAphage	1	1	classified	VC53089	FALSE	TRUE	temperate
ma2024imeta	contig025657	contig027189	Duplodnaviria	Heunggongvirae	Uroviricota	Caudoviricetes	[Novel_Order]_{class}_Caudoviricetes	[Novel_Family]_{class}_Caudoviricetes	[Novel_Genus]_{class}_Caudoviricetes	Viruses	0.987	dsDNAphage	1	1	classified	VC33365	FALSE	TRUE	temperate
ma2024imeta	contig025661	contig181265	Duplodnaviria	Heunggongvirae	Uroviricota	Caudoviricetes	[Novel_Order]_{class}_Caudoviricetes	[Novel_Family]_{class}_Caudoviricetes	[Novel_Genus]_{class}_Caudoviricetes	Viruses	1	dsDNAphage	1	1	classified	VC25550	FALSE	TRUE	virulent
ma2024imeta	contig025674	contig025674	Duplodnaviria	Heunggongvirae	Uroviricota	Caudoviricetes	[Novel_Order]_{class}_Caudoviricetes	[Novel_Family]_{class}_Caudoviricetes	[Novel_Genus]_{class}_Caudoviricetes	Viruses	0.993	dsDNAphage	1	1	classified	VC56778	FALSE	TRUE	temperate
ma2024imeta	contig025687	contig025815	Duplodnaviria	Heunggongvirae	Uroviricota	Caudoviricetes	[Novel_Order]_{class}_Caudoviricetes	[Novel_Family]_{class}_Caudoviricetes	[Novel_Genus]_{class}_Caudoviricetes	Viruses	1	dsDNAphage	1	1	classified	VC43761	FALSE	TRUE	temperate
ma2024imeta	contig025709	contig026993	Duplodnaviria	Heunggongvirae	Uroviricota	Caudoviricetes	[Novel_Order]_{class}_Caudoviricetes	[Novel_Family]_{class}_Caudoviricetes	[Novel_Genus]_{class}_Caudoviricetes	Viruses	0.993	dsDNAphage	1	3	classified	VC33294	FALSE	TRUE	temperate
ma2024imeta	contig025763	contig025763	Duplodnaviria	Heunggongvirae	Uroviricota	Caudoviricetes	[Novel_Order]_{class}_Caudoviricetes	[Novel_Family]_{class}_Caudoviricetes	[Novel_Genus]_{class}_Caudoviricetes	Viruses	1	dsDNAphage	1	4	classified	VC17975	FALSE	TRUE	temperate
ma2024imeta	contig025973	contig069120	Duplodnaviria	Heunggongvirae	Uroviricota	Caudoviricetes	[Novel_Order]_{class}_Caudoviricetes	[Novel_Family]_{class}_Caudoviricetes	[Novel_Genus]_{class}_Caudoviricetes	Viruses	0.987	dsDNAphage	1	1	classified	VC31598	FALSE	TRUE	temperate
ma2024imeta	contig025985	contig128274	Duplodnaviria	Heunggongvirae	Uroviricota	Caudoviricetes	[Novel_Order]_{class}_Caudoviricetes	[Novel_Family]_{class}_Caudoviricetes	[Novel_Genus]_{class}_Caudoviricetes	Viruses	0.987	dsDNAphage	1	1	classified	VC45000	FALSE	TRUE	temperate
ma2024imeta	contig026110	contig028218	Duplodnaviria	Heunggongvirae	Uroviricota	Caudoviricetes	[Novel_Order]_{class}_Caudoviricetes	[Novel_Family]_{class}_Caudoviricetes	[Novel_Genus]_{class}_Caudoviricetes	Viruses	0.967	dsDNAphage	1	4	classified	VC56662	FALSE	TRUE	virulent
ma2024imeta	contig026182	contig026182	Duplodnaviria	Heunggongvirae	Uroviricota	Caudoviricetes	[Novel_Order]_{class}_Caudoviricetes	[Novel_Family]_{class}_Caudoviricetes	[Novel_Genus]_{class}_Caudoviricetes	Viruses	0.993	dsDNAphage	1	3	classified	VC25392	FALSE	TRUE	temperate
ma2024imeta	contig026222	contig028042	Duplodnaviria	Heunggongvirae	Uroviricota	Caudoviricetes	[Novel_Order]_{class}_Caudoviricetes	[Novel_Family]_{class}_Caudoviricetes	[Novel_Genus]_{class}_Caudoviricetes	Viruses	0.96	dsDNAphage	1	2	classified	VC30747	FALSE	TRUE	virulent
ma2024imeta	contig026308	contig097909	Duplodnaviria	Heunggongvirae	Uroviricota	Caudoviricetes	[Novel_Order]_{class}_Caudoviricetes	[Novel_Family]_{class}_Caudoviricetes	[Novel_Genus]_{class}_Caudoviricetes	Viruses	1	dsDNAphage	1	1	classified	VC24912	FALSE	TRUE	virulent
ma2024imeta	contig026355	contig021847	Duplodnaviria	Heunggongvirae	Uroviricota	Caudoviricetes	[Novel_Order]_{class}_Caudoviricetes	[Novel_Family]_{class}_Caudoviricetes	[Novel_Genus]_{class}_Caudoviricetes	Viruses	0.987	dsDNAphage	1	1	classified	VC29374	FALSE	TRUE	temperate
ma2024imeta	contig026364	contig028829	Duplodnaviria	Heunggongvirae	Uroviricota	Caudoviricetes	[Novel_Order]_{class}_Caudoviricetes	[Novel_Family]_{class}_Caudoviricetes	[Novel_Genus]_{class}_Caudoviricetes	Viruses	0.993	dsDNAphage	1	2	classified	VC44287	FALSE	TRUE	temperate
ma2024imeta	contig026443	contig026443	Duplodnaviria	Heunggongvirae	Uroviricota	Caudoviricetes	[Novel_Order]_{class}_Caudoviricetes	[Novel_Family]_{class}_Caudoviricetes	[Novel_Genus]_{class}_Caudoviricetes	Viruses	0.973	dsDNAphage	1	1	classified	VC25425	FALSE	TRUE	virulent
ma2024imeta	contig026449	contig026449	Duplodnaviria	Heunggongvirae	Uroviricota	Caudoviricetes	[Novel_Order]_{class}_Caudoviricetes	[Novel_Family]_{class}_Caudoviricetes	[Novel_Genus]_{class}_Caudoviricetes	Viruses	1	dsDNAphage	1	3	classified	VC13283	FALSE	TRUE	temperate
ma2024imeta	contig026467	contig028826	Duplodnaviria	Heunggongvirae	Uroviricota	Caudoviricetes	[Novel_Order]_{class}_Caudoviricetes	[Novel_Family]_{class}_Caudoviricetes	[Novel_Genus]_{class}_Caudoviricetes	Viruses	1	dsDNAphage	1	3	classified	VC65429	FALSE	TRUE	virulent
ma2024imeta	contig026496	contig026496	Duplodnaviria	Heunggongvirae	Uroviricota	Caudoviricetes	[Novel_Order]_{class}_Caudoviricetes	[Novel_Family]_{class}_Caudoviricetes	[Novel_Genus]_{class}_Caudoviricetes	Viruses	1	dsDNAphage	1	1	classified	VC21766	FALSE	TRUE	temperate
ma2024imeta	contig026533	contig026533	Duplodnaviria	Heunggongvirae	Uroviricota	Caudoviricetes	[Novel_Order]_{class}_Caudoviricetes	[Novel_Family]_{class}_Caudoviricetes	[Novel_Genus]_{class}_Caudoviricetes	Viruses	0.993	dsDNAphage	1	1	classified	VC52231	FALSE	TRUE	temperate
ma2024imeta	contig026539	contig026539	Duplodnaviria	Heunggongvirae	Uroviricota	Caudoviricetes	[Novel_Order]_{class}_Caudoviricetes	[Novel_Family]_{class}_Caudoviricetes	[Novel_Genus]_{class}_Caudoviricetes	Viruses	1	dsDNAphage	1	1	classified	VC45570	FALSE	TRUE	temperate
ma2024imeta	contig026545	contig026545	Duplodnaviria	Heunggongvirae	Uroviricota	Caudoviricetes	[Novel_Order]_{class}_Caudoviricetes	[Novel_Family]_{class}_Caudoviricetes	[Novel_Genus]_{class}_Caudoviricetes	Viruses	1	dsDNAphage	1	1	classified	VC40757	FALSE	TRUE	temperate
ma2024imeta	contig026563	contig296787	Duplodnaviria	Heunggongvirae	Uroviricota	Caudoviricetes	[Novel_Order]_{class}_Caudoviricetes	[Novel_Family]_{class}_Caudoviricetes	[Novel_Genus]_{class}_Caudoviricetes	Viruses	0.967	dsDNAphage	1	2	classified	VC16311	FALSE	TRUE	temperate
ma2024imeta	contig026583	contig026583	Duplodnaviria	Heunggongvirae	Uroviricota	Caudoviricetes	[Unclassified_Order]_{genus}_Mushuvirus	[Unclassified_Family]_{genus}_Mushuvirus	Mushuvirus	Viruses	0.993	dsDNAphage	1	2	classified	VC58015	TRUE	FALSE	virulent
ma2024imeta	contig026898	contig026898	Duplodnaviria	Heunggongvirae	Uroviricota	Caudoviricetes	[Novel_Order]_{class}_Caudoviricetes	[Novel_Family]_{class}_Caudoviricetes	[Novel_Genus]_{class}_Caudoviricetes	Viruses	0.993	dsDNAphage	1	1	classified	VC23084	FALSE	TRUE	temperate
ma2024imeta	contig026903	contig106869	Duplodnaviria	Heunggongvirae	Uroviricota	Caudoviricetes	[Novel_Order]_{class}_Caudoviricetes	[Novel_Family]_{class}_Caudoviricetes	[Novel_Genus]_{class}_Caudoviricetes	Viruses	1	dsDNAphage	1	1	classified	VC31597	FALSE	TRUE	temperate
ma2024imeta	contig026971	contig029365	Duplodnaviria	Heunggongvirae	Uroviricota	Caudoviricetes	[Novel_Order]_{class}_Caudoviricetes	[Novel_Family]_{class}_Caudoviricetes	[Novel_Genus]_{class}_Caudoviricetes	Viruses	0.987	dsDNAphage	1	1	classified	VC07843	FALSE	TRUE	temperate
ma2024imeta	contig027176	contig027176	Duplodnaviria	Heunggongvirae	Uroviricota	Caudoviricetes	[Novel_Order]_{class}_Caudoviricetes	[Novel_Family]_{class}_Caudoviricetes	[Novel_Genus]_{class}_Caudoviricetes	Viruses	0.993	dsDNAphage	1	1	classified	VC31594	FALSE	TRUE	temperate
ma2024imeta	contig027187	contig027305	Duplodnaviria	Heunggongvirae	Uroviricota	Caudoviricetes	[Novel_Order]_{class}_Caudoviricetes	[Novel_Family]_{class}_Caudoviricetes	[Novel_Genus]_{class}_Caudoviricetes	Viruses	1	dsDNAphage	1	1	classified	VC31598	FALSE	TRUE	temperate
ma2024imeta	contig027225	contig141724	Duplodnaviria	Heunggongvirae	Uroviricota	Caudoviricetes	[Novel_Order]_{class}_Caudoviricetes	[Novel_Family]_{class}_Caudoviricetes	[Novel_Genus]_{class}_Caudoviricetes	Viruses	1	dsDNAphage	1	1	classified	VC34225	FALSE	TRUE	temperate
ma2024imeta	contig027742	contig027742	Duplodnaviria	Heunggongvirae	Uroviricota	Caudoviricetes	[Novel_Order]_{class}_Caudoviricetes	[Novel_Family]_{class}_Caudoviricetes	[Novel_Genus]_{class}_Caudoviricetes	Viruses	1	dsDNAphage	1	1	classified	VC33012	FALSE	TRUE	temperate
ma2024imeta	contig027820	contig027522	Duplodnaviria	Heunggongvirae	Uroviricota	Caudoviricetes	[Novel_Order]_{class}_Caudoviricetes	[Novel_Family]_{class}_Caudoviricetes	[Novel_Genus]_{class}_Caudoviricetes	Viruses	1	dsDNAphage	1	4	classified	VC38817	FALSE	TRUE	temperate
ma2024imeta	contig027852	contig027373	Duplodnaviria	Heunggongvirae	Uroviricota	Caudoviricetes	[Novel_Order]_{class}_Caudoviricetes	[Novel_Family]_{class}_Caudoviricetes	[Novel_Genus]_{class}_Caudoviricetes	Viruses	1	dsDNAphage	1	1	classified	VC48536	FALSE	TRUE	temperate
ma2024imeta	contig028911	contig028911	Duplodnaviria	Heunggongvirae	Uroviricota	Caudoviricetes	[Novel_Order]_{class}_Caudoviricetes	[Novel_Family]_{class}_Caudoviricetes	[Novel_Genus]_{class}_Caudoviricetes	Viruses	1	dsDNAphage	1	3	classified	VC32761	FALSE	TRUE	temperate
ma2024imeta	contig029369	contig029369	Duplodnaviria	Heunggongvirae	Uroviricota	Caudoviricetes	[Novel_Order]_{class}_Caudoviricetes	[Novel_Family]_{class}_Caudoviricetes	[Novel_Genus]_{class}_Caudoviricetes	Viruses	0.98	dsDNAphage	1	3	classified	VC30192	FALSE	TRUE	temperate
ma2024imeta	contig029555	contig029555	Duplodnaviria	Heunggongvirae	Uroviricota	Caudoviricetes	[Novel_Order]_{class}_Caudoviricetes	[Novel_Family]_{class}_Caudoviricetes	[Novel_Genus]_{class}_Caudoviricetes	Viruses	1	dsDNAphage	1	1	classified	VC24912	FALSE	TRUE	virulent
ma2024imeta	contig029919	contig030319	Duplodnaviria	Heunggongvirae	Uroviricota	Caudoviricetes	[Novel_Order]_{class}_Caudoviricetes	[Novel_Family]_{class}_Caudoviricetes	[Novel_Genus]_{class}_Caudoviricetes	Viruses	1	dsDNAphage	1	1	classified	VC73796	TRUE	FALSE	virulent
ma2024imeta	contig029921	contig029921	Duplodnaviria	Heunggongvirae	Uroviricota	Caudoviricetes	[Novel_Order]_{class}_Caudoviricetes	[Novel_Family]_{class}_Caudoviricetes	[Novel_Genus]_{class}_Caudoviricetes	Viruses	0.987	dsDNAphage	1	1	classified	VC40718	FALSE	TRUE	temperate
ma2024imeta	contig029926	contig030416	Duplodnaviria	Heunggongvirae	Uroviricota	Caudoviricetes	[Unclassified_Order]_{family}_Drexlerviridae	Drexlerviridae	[Novel_Genus]_{family}_Drexlerviridae	Viruses	0.993	dsDNAphage	1	1	classified	VC71878	TRUE	FALSE	virulent
ma2024imeta	contig029930	contig029930	Duplodnaviria	Heunggongvirae	Uroviricota	Caudoviricetes	[Novel_Order]_{class}_Caudoviricetes	[Novel_Family]_{class}_Caudoviricetes	[Novel_Genus]_{class}_Caudoviricetes	Viruses	0.987	dsDNAphage	1	1	classified	VC59897	FALSE	TRUE	virulent
ma2024imeta	contig029996	contig029996	Duplodnaviria	Heunggongvirae	Uroviricota	Caudoviricetes	[Novel_Order]_{class}_Caudoviricetes	[Novel_Family]_{class}_Caudoviricetes	[Novel_Genus]_{class}_Caudoviricetes	Viruses	1	dsDNAphage	1	2	classified	VC52535	FALSE	TRUE	temperate
ma2024imeta	contig030127	contig134909	Duplodnaviria	Heunggongvirae	Uroviricota	Caudoviricetes	[Novel_Order]_{class}_Caudoviricetes	[Novel_Family]_{class}_Caudoviricetes	[Novel_Genus]_{class}_Caudoviricetes	Viruses	1	dsDNAphage	1	2	classified	VC58516	FALSE	TRUE	temperate
ma2024imeta	contig030189	contig030189	Duplodnaviria	Heunggongvirae	Uroviricota	Caudoviricetes	[Novel_Order]_{class}_Caudoviricetes	[Novel_Family]_{class}_Caudoviricetes	[Novel_Genus]_{class}_Caudoviricetes	Viruses	1	dsDNAphage	1	1	classified	VC15685	FALSE	TRUE	virulent
ma2024imeta	contig030219	contig030219	Duplodnaviria	Heunggongvirae	Uroviricota	Caudoviricetes	[Unclassified_Order]_{genus}_Dhillonvirus	[Unclassified_Family]_{genus}_Dhillonvirus	Dhillonvirus	Viruses	1	dsDNAphage	1	1	classified	VC72059	TRUE	FALSE	virulent
ma2024imeta	contig030222	contig030222	Duplodnaviria	Heunggongvirae	Uroviricota	Caudoviricetes	[Unclassified_Order]_{family}_Schitoviridae	Schitoviridae	Gamaleyavirus	Viruses	1	dsDNAphage	1	1	classified	VC67095	TRUE	FALSE	virulent
ma2024imeta	contig030275	contig030275	Duplodnaviria	Heunggongvirae	Uroviricota	Caudoviricetes	[Novel_Order]_{class}_Caudoviricetes	[Novel_Family]_{class}_Caudoviricetes	[Novel_Genus]_{class}_Caudoviricetes	Viruses	1	dsDNAphage	1	1	classified	VC49455	FALSE	TRUE	temperate
ma2024imeta	contig030338	contig030338	Duplodnaviria	Heunggongvirae	Uroviricota	Caudoviricetes	[Unclassified_Order]_{genus}_Efquatrovirus	[Unclassified_Family]_{genus}_Efquatrovirus	Efquatrovirus	Viruses	1	dsDNAphage	1	1	classified	VC40257	TRUE	FALSE	virulent
ma2024imeta	contig030647	contig136054	Duplodnaviria	Heunggongvirae	Uroviricota	Caudoviricetes	[Novel_Order]_{class}_Caudoviricetes	[Novel_Family]_{class}_Caudoviricetes	[Novel_Genus]_{class}_Caudoviricetes	Viruses	0.987	dsDNAphage	1	2	classified	VC22456	FALSE	TRUE	temperate
ma2024imeta	contig030814	contig030814	Monodnaviria	Shotokuvirae	Cressdnaviricota	Arfiviricetes	Cirlivirales	Circoviridae	[Novel_Genus]_{family}_Circoviridae	Viruses	0.987	lavidaviridae	2	4	unclassified	VC78251	FALSE	FALSE	virulent
ma2024imeta	contig030969	contig030969	Duplodnaviria	Heunggongvirae	Uroviricota	Caudoviricetes	[Novel_Order]_{class}_Caudoviricetes	[Novel_Family]_{class}_Caudoviricetes	[Novel_Genus]_{class}_Caudoviricetes	Viruses	0.993	dsDNAphage	1	1	classified	VC22059	FALSE	TRUE	temperate
ma2024imeta	contig030977	contig030977	Duplodnaviria	Heunggongvirae	Uroviricota	Caudoviricetes	[Novel_Order]_{class}_Caudoviricetes	[Novel_Family]_{class}_Caudoviricetes	[Novel_Genus]_{class}_Caudoviricetes	Viruses	0.993	dsDNAphage	1	1	classified	VC31312	FALSE	TRUE	temperate
ma2024imeta	contig030979	contig030979	Duplodnaviria	Heunggongvirae	Uroviricota	Caudoviricetes	[Novel_Order]_{class}_Caudoviricetes	[Novel_Family]_{class}_Caudoviricetes	[Novel_Genus]_{class}_Caudoviricetes	Viruses	0.993	dsDNAphage	1	1	classified	VC72004	FALSE	TRUE	virulent
ma2024imeta	contig031016	contig136167	Duplodnaviria	Heunggongvirae	Uroviricota	Caudoviricetes	[Novel_Order]_{class}_Caudoviricetes	[Novel_Family]_{class}_Caudoviricetes	[Novel_Genus]_{class}_Caudoviricetes	Viruses	1	dsDNAphage	1	3	classified	VC57918	FALSE	TRUE	temperate
ma2024imeta	contig031050	contig031050	Duplodnaviria	Heunggongvirae	Uroviricota	Caudoviricetes	[Novel_Order]_{class}_Caudoviricetes	[Novel_Family]_{class}_Caudoviricetes	[Novel_Genus]_{class}_Caudoviricetes	Viruses	1	dsDNAphage	1	2	classified	VC36038	FALSE	TRUE	temperate
ma2024imeta	contig031247	contig031247	Duplodnaviria	Heunggongvirae	Uroviricota	Caudoviricetes	[Novel_Order]_{class}_Caudoviricetes	[Novel_Family]_{class}_Caudoviricetes	[Novel_Genus]_{class}_Caudoviricetes	Viruses	0.987	dsDNAphage	1	4	classified	VC24773	FALSE	TRUE	temperate
ma2024imeta	contig031281	contig136998	Duplodnaviria	Heunggongvirae	Uroviricota	Caudoviricetes	[Novel_Order]_{class}_Caudoviricetes	[Novel_Family]_{class}_Caudoviricetes	[Novel_Genus]_{class}_Caudoviricetes	Viruses	0.993	dsDNAphage	1	2	classified	VC40796	FALSE	TRUE	virulent
ma2024imeta	contig031289	contig031289	Duplodnaviria	Heunggongvirae	Uroviricota	Caudoviricetes	[Novel_Order]_{class}_Caudoviricetes	[Novel_Family]_{class}_Caudoviricetes	[Novel_Genus]_{class}_Caudoviricetes	Viruses	0.993	dsDNAphage	1	1	classified	VC25815	FALSE	TRUE	temperate
ma2024imeta	contig031483	contig031483	Duplodnaviria	Heunggongvirae	Uroviricota	Caudoviricetes	[Novel_Order]_{class}_Caudoviricetes	[Novel_Family]_{class}_Caudoviricetes	[Novel_Genus]_{class}_Caudoviricetes	Viruses	0.993	dsDNAphage	1	4	classified	VC38752	FALSE	TRUE	temperate
ma2024imeta	contig031545	contig031545	Duplodnaviria	Heunggongvirae	Uroviricota	Caudoviricetes	[Novel_Order]_{class}_Caudoviricetes	[Novel_Family]_{class}_Caudoviricetes	[Novel_Genus]_{class}_Caudoviricetes	Viruses	1	dsDNAphage	1	1	classified	VC48485	FALSE	TRUE	temperate
ma2024imeta	contig031705	contig031705	Duplodnaviria	Heunggongvirae	Uroviricota	Caudoviricetes	[Novel_Order]_{class}_Caudoviricetes	[Novel_Family]_{class}_Caudoviricetes	[Novel_Genus]_{class}_Caudoviricetes	Viruses	1	dsDNAphage	1	2	classified	VC38337	FALSE	TRUE	temperate
ma2024imeta	contig031737	contig031737	Duplodnaviria	Heunggongvirae	Uroviricota	Caudoviricetes	[Novel_Order]_{class}_Caudoviricetes	[Novel_Family]_{class}_Caudoviricetes	[Novel_Genus]_{class}_Caudoviricetes	Viruses	0.993	dsDNAphage	1	2	classified	VC36593	FALSE	TRUE	temperate
ma2024imeta	contig031812	contig031812	Duplodnaviria	Heunggongvirae	Uroviricota	Caudoviricetes	[Novel_Order]_{class}_Caudoviricetes	[Novel_Family]_{class}_Caudoviricetes	[Novel_Genus]_{class}_Caudoviricetes	Viruses	0.98	dsDNAphage	1	2	classified	VC28880	FALSE	TRUE	temperate
ma2024imeta	contig031830	contig031830	Duplodnaviria	Heunggongvirae	Uroviricota	Caudoviricetes	[Novel_Order]_{class}_Caudoviricetes	[Novel_Family]_{class}_Caudoviricetes	[Novel_Genus]_{class}_Caudoviricetes	Viruses	0.993	dsDNAphage	1	3	classified	VC31959	FALSE	TRUE	temperate
ma2024imeta	contig031857	contig031857	Duplodnaviria	Heunggongvirae	Uroviricota	Caudoviricetes	[Novel_Order]_{class}_Caudoviricetes	[Novel_Family]_{class}_Caudoviricetes	[Novel_Genus]_{class}_Caudoviricetes	Viruses	0.967	dsDNAphage	1	4	classified	VC63569	FALSE	TRUE	temperate
ma2024imeta	contig031912	contig031912	Duplodnaviria	Heunggongvirae	Uroviricota	Caudoviricetes	[Novel_Order]_{class}_Caudoviricetes	[Novel_Family]_{class}_Caudoviricetes	[Novel_Genus]_{class}_Caudoviricetes	Viruses	1	dsDNAphage	1	1	classified	VC37884	FALSE	TRUE	temperate
ma2024imeta	contig031927	contig043744	Duplodnaviria	Heunggongvirae	Uroviricota	Caudoviricetes	[Novel_Order]_{class}_Caudoviricetes	[Novel_Family]_{class}_Caudoviricetes	[Novel_Genus]_{class}_Caudoviricetes	Viruses	1	dsDNAphage	1	1	classified	VC67025	FALSE	TRUE	temperate
ma2024imeta	contig032041	contig032041	Duplodnaviria	Heunggongvirae	Uroviricota	Caudoviricetes	[Novel_Order]_{class}_Caudoviricetes	[Novel_Family]_{class}_Caudoviricetes	[Novel_Genus]_{class}_Caudoviricetes	Viruses	0.993	dsDNAphage	1	1	classified	VC36125	FALSE	TRUE	temperate
ma2024imeta	contig032158	contig032158	Duplodnaviria	Heunggongvirae	Uroviricota	Caudoviricetes	[Novel_Order]_{class}_Caudoviricetes	[Novel_Family]_{class}_Caudoviricetes	[Novel_Genus]_{class}_Caudoviricetes	Viruses	1	dsDNAphage	1	3	classified	VC20955	FALSE	TRUE	virulent
ma2024imeta	contig032318	contig032318	Duplodnaviria	Heunggongvirae	Uroviricota	Caudoviricetes	[Novel_Order]_{class}_Caudoviricetes	[Novel_Family]_{class}_Caudoviricetes	[Novel_Genus]_{class}_Caudoviricetes	Viruses	1	dsDNAphage	1	1	classified	VC28446	FALSE	TRUE	virulent
ma2024imeta	contig032320	contig032320	Duplodnaviria	Heunggongvirae	Uroviricota	Caudoviricetes	[Novel_Order]_{class}_Caudoviricetes	[Novel_Family]_{class}_Caudoviricetes	[Novel_Genus]_{class}_Caudoviricetes	Viruses	1	dsDNAphage	1	1	classified	VC44962	FALSE	TRUE	temperate
ma2024imeta	contig032322	contig032322	Monodnaviria	Sangervirae	Phixviricota	Malgrandaviricetes	Petitvirales	Microviridae	[Novel_Genus]_{family}_Microviridae	Viruses	1	dsDNAphage	1	1	unclassified	VC77600	FALSE	FALSE	virulent
ma2024imeta	contig032363	contig032363	Duplodnaviria	Heunggongvirae	Uroviricota	Caudoviricetes	[Novel_Order]_{class}_Caudoviricetes	[Novel_Family]_{class}_Caudoviricetes	[Novel_Genus]_{class}_Caudoviricetes	Viruses	1	dsDNAphage	1	1	classified	VC60138	FALSE	TRUE	virulent
ma2024imeta	contig032372	contig032372	Duplodnaviria	Heunggongvirae	Uroviricota	Caudoviricetes	[Novel_Order]_{class}_Caudoviricetes	[Novel_Family]_{class}_Caudoviricetes	[Novel_Genus]_{class}_Caudoviricetes	Viruses	1	dsDNAphage	1	3	classified	VC36488	FALSE	TRUE	virulent
ma2024imeta	contig032375	contig032375	Duplodnaviria	Heunggongvirae	Uroviricota	Caudoviricetes	[Novel_Order]_{class}_Caudoviricetes	[Novel_Family]_{class}_Caudoviricetes	[Novel_Genus]_{class}_Caudoviricetes	Viruses	0.987	dsDNAphage	1	1	classified	VC63531	FALSE	TRUE	temperate
ma2024imeta	contig032399	contig032399	Duplodnaviria	Heunggongvirae	Uroviricota	Caudoviricetes	[Novel_Order]_{class}_Caudoviricetes	[Novel_Family]_{class}_Caudoviricetes	[Novel_Genus]_{class}_Caudoviricetes	Viruses	1	dsDNAphage	1	1	classified	VC61844	FALSE	TRUE	virulent
ma2024imeta	contig032499	contig032499	Duplodnaviria	Heunggongvirae	Uroviricota	Caudoviricetes	[Novel_Order]_{class}_Caudoviricetes	[Novel_Family]_{class}_Caudoviricetes	[Novel_Genus]_{class}_Caudoviricetes	Viruses	1	dsDNAphage	1	1	classified	VC43716	FALSE	TRUE	virulent
ma2024imeta	contig032523	contig032523	Duplodnaviria	Heunggongvirae	Uroviricota	Caudoviricetes	[Novel_Order]_{class}_Caudoviricetes	[Novel_Family]_{class}_Caudoviricetes	[Novel_Genus]_{class}_Caudoviricetes	Viruses	0.993	dsDNAphage	1	4	classified	VC75419	FALSE	TRUE	virulent
ma2024imeta	contig032543	contig032543	Duplodnaviria	Heunggongvirae	Uroviricota	Caudoviricetes	[Novel_Order]_{class}_Caudoviricetes	[Novel_Family]_{class}_Caudoviricetes	[Novel_Genus]_{class}_Caudoviricetes	Viruses	0.987	dsDNAphage	1	1	classified	VC54885	FALSE	TRUE	temperate
ma2024imeta	contig032599	contig032599	Duplodnaviria	Heunggongvirae	Uroviricota	Caudoviricetes	[Novel_Order]_{class}_Caudoviricetes	[Novel_Family]_{class}_Caudoviricetes	[Novel_Genus]_{class}_Caudoviricetes	Viruses	0.993	dsDNAphage	1	1	classified	VC27689	FALSE	TRUE	virulent
ma2024imeta	contig032764	contig032764	Duplodnaviria	Heunggongvirae	Uroviricota	Caudoviricetes	[Novel_Order]_{class}_Caudoviricetes	[Novel_Family]_{class}_Caudoviricetes	[Novel_Genus]_{class}_Caudoviricetes	Viruses	0.993	dsDNAphage	1	1	classified	VC55971	FALSE	TRUE	temperate
ma2024imeta	contig032773	contig032773	Duplodnaviria	Heunggongvirae	Uroviricota	Caudoviricetes	[Novel_Order]_{class}_Caudoviricetes	[Novel_Family]_{class}_Caudoviricetes	[Novel_Genus]_{class}_Caudoviricetes	Viruses	0.993	dsDNAphage	1	1	classified	VC20769	FALSE	TRUE	virulent
ma2024imeta	contig032780	contig032780	Duplodnaviria	Heunggongvirae	Uroviricota	Caudoviricetes	[Novel_Order]_{class}_Caudoviricetes	[Novel_Family]_{class}_Caudoviricetes	[Novel_Genus]_{class}_Caudoviricetes	Viruses	0.973	dsDNAphage	1	1	classified	VC16379	FALSE	TRUE	virulent
ma2024imeta	contig032783	contig032783	Duplodnaviria	Heunggongvirae	Uroviricota	Caudoviricetes	[Novel_Order]_{class}_Caudoviricetes	[Novel_Family]_{class}_Caudoviricetes	[Novel_Genus]_{class}_Caudoviricetes	Viruses	0.987	dsDNAphage	1	1	classified	VC67728	FALSE	TRUE	virulent
ma2024imeta	contig032789	contig032789	Duplodnaviria	Heunggongvirae	Uroviricota	Caudoviricetes	[Novel_Order]_{class}_Caudoviricetes	[Novel_Family]_{class}_Caudoviricetes	[Novel_Genus]_{class}_Caudoviricetes	Viruses	0.993	dsDNAphage	1	1	classified	VC65256	FALSE	TRUE	virulent
ma2024imeta	contig032792	contig032792	Duplodnaviria	Heunggongvirae	Uroviricota	Caudoviricetes	[Novel_Order]_{class}_Caudoviricetes	[Novel_Family]_{class}_Caudoviricetes	[Novel_Genus]_{class}_Caudoviricetes	Viruses	1	dsDNAphage	1	1	classified	VC19951	FALSE	TRUE	virulent
ma2024imeta	contig032797	contig032797	Duplodnaviria	Heunggongvirae	Uroviricota	Caudoviricetes	[Novel_Order]_{class}_Caudoviricetes	[Novel_Family]_{class}_Caudoviricetes	[Novel_Genus]_{class}_Caudoviricetes	Viruses	0.947	dsDNAphage	1	1	classified	VC35470	FALSE	TRUE	virulent
ma2024imeta	contig032798	contig032798	Duplodnaviria	Heunggongvirae	Uroviricota	Caudoviricetes	[Novel_Order]_{class}_Caudoviricetes	[Novel_Family]_{class}_Caudoviricetes	[Novel_Genus]_{class}_Caudoviricetes	Viruses	1	dsDNAphage	1	1	classified	VC48062	FALSE	TRUE	temperate
ma2024imeta	contig032807	contig032807	Duplodnaviria	Heunggongvirae	Uroviricota	Caudoviricetes	[Novel_Order]_{class}_Caudoviricetes	[Novel_Family]_{class}_Caudoviricetes	[Novel_Genus]_{class}_Caudoviricetes	Viruses	1	dsDNAphage	1	1	classified	VC62088	FALSE	TRUE	virulent
ma2024imeta	contig032809	contig032809	Duplodnaviria	Heunggongvirae	Uroviricota	Caudoviricetes	[Novel_Order]_{class}_Caudoviricetes	[Novel_Family]_{class}_Caudoviricetes	[Novel_Genus]_{class}_Caudoviricetes	Viruses	0.98	dsDNAphage	1	1	classified	VC08380	FALSE	TRUE	virulent
ma2024imeta	contig032847	contig032847	Duplodnaviria	Heunggongvirae	Uroviricota	Caudoviricetes	[Novel_Order]_{class}_Caudoviricetes	[Novel_Family]_{class}_Caudoviricetes	[Novel_Genus]_{class}_Caudoviricetes	Viruses	1	dsDNAphage	1	1	classified	VC62042	FALSE	TRUE	virulent
ma2024imeta	contig032912	contig032912	Duplodnaviria	Heunggongvirae	Uroviricota	Caudoviricetes	[Novel_Order]_{class}_Caudoviricetes	[Novel_Family]_{class}_Caudoviricetes	[Novel_Genus]_{class}_Caudoviricetes	Viruses	0.993	dsDNAphage	1	3	classified	VC36702	FALSE	TRUE	virulent
ma2024imeta	contig032914	contig032914	Duplodnaviria	Heunggongvirae	Uroviricota	Caudoviricetes	[Novel_Order]_{class}_Caudoviricetes	[Novel_Family]_{class}_Caudoviricetes	[Novel_Genus]_{class}_Caudoviricetes	Viruses	0.993	dsDNAphage	1	1	classified	VC36373	FALSE	TRUE	virulent
ma2024imeta	contig032977	contig032977	Duplodnaviria	Heunggongvirae	Uroviricota	Caudoviricetes	[Novel_Order]_{class}_Caudoviricetes	[Novel_Family]_{class}_Caudoviricetes	[Novel_Genus]_{class}_Caudoviricetes	Viruses	0.993	dsDNAphage	1	3	classified	VC28490	FALSE	TRUE	virulent
ma2024imeta	contig033045	contig033045	Duplodnaviria	Heunggongvirae	Uroviricota	Caudoviricetes	[Novel_Order]_{class}_Caudoviricetes	[Novel_Family]_{class}_Caudoviricetes	[Novel_Genus]_{class}_Caudoviricetes	Viruses	0.993	dsDNAphage	1	1	classified	VC34285	FALSE	TRUE	virulent
ma2024imeta	contig033146	contig033146	Duplodnaviria	Heunggongvirae	Uroviricota	Caudoviricetes	[Novel_Order]_{class}_Caudoviricetes	[Novel_Family]_{class}_Caudoviricetes	[Novel_Genus]_{class}_Caudoviricetes	Viruses	0.967	dsDNAphage	1	1	classified	VC25274	FALSE	TRUE	temperate
ma2024imeta	contig033310	contig033310	Duplodnaviria	Heunggongvirae	Uroviricota	Caudoviricetes	[Novel_Order]_{class}_Caudoviricetes	[Novel_Family]_{class}_Caudoviricetes	[Novel_Genus]_{class}_Caudoviricetes	Viruses	0.987	dsDNAphage	1	4	classified	VC62067	FALSE	TRUE	temperate
ma2024imeta	contig033540	contig033540	Duplodnaviria	Heunggongvirae	Uroviricota	Caudoviricetes	[Novel_Order]_{class}_Caudoviricetes	[Novel_Family]_{class}_Caudoviricetes	[Novel_Genus]_{class}_Caudoviricetes	Viruses	0.987	dsDNAphage	1	4	classified	VC21601	FALSE	TRUE	temperate
ma2024imeta	contig033565	contig033565	Duplodnaviria	Heunggongvirae	Uroviricota	Caudoviricetes	[Novel_Order]_{class}_Caudoviricetes	[Novel_Family]_{class}_Caudoviricetes	[Novel_Genus]_{class}_Caudoviricetes	Viruses	1	dsDNAphage	1	1	classified	VC30710	FALSE	TRUE	temperate
ma2024imeta	contig033569	contig033569	Duplodnaviria	Heunggongvirae	Uroviricota	Caudoviricetes	[Novel_Order]_{class}_Caudoviricetes	[Novel_Family]_{class}_Caudoviricetes	[Novel_Genus]_{class}_Caudoviricetes	Viruses	1	dsDNAphage	1	1	classified	VC59069	FALSE	TRUE	virulent
ma2024imeta	contig033676	contig033676	Duplodnaviria	Heunggongvirae	Uroviricota	Caudoviricetes	[Novel_Order]_{class}_Caudoviricetes	[Novel_Family]_{class}_Caudoviricetes	[Novel_Genus]_{class}_Caudoviricetes	Viruses	1	dsDNAphage	1	1	classified	VC25210	FALSE	TRUE	temperate
ma2024imeta	contig033724	contig033724	Duplodnaviria	Heunggongvirae	Uroviricota	Caudoviricetes	[Novel_Order]_{class}_Caudoviricetes	[Novel_Family]_{class}_Caudoviricetes	[Novel_Genus]_{class}_Caudoviricetes	Viruses	1	dsDNAphage	1	1	classified	VC31547	FALSE	TRUE	virulent
ma2024imeta	contig033739	contig033739	Duplodnaviria	Heunggongvirae	Uroviricota	Caudoviricetes	[Novel_Order]_{class}_Caudoviricetes	[Novel_Family]_{class}_Caudoviricetes	[Novel_Genus]_{class}_Caudoviricetes	Viruses	1	dsDNAphage	1	1	classified	VC59101	FALSE	TRUE	virulent
ma2024imeta	contig033769	contig033769	Duplodnaviria	Heunggongvirae	Uroviricota	Caudoviricetes	[Novel_Order]_{class}_Caudoviricetes	[Novel_Family]_{class}_Caudoviricetes	[Novel_Genus]_{class}_Caudoviricetes	Viruses	1	dsDNAphage	1	1	classified	VC52599	FALSE	TRUE	virulent
ma2024imeta	contig033777	contig033777	Duplodnaviria	Heunggongvirae	Uroviricota	Caudoviricetes	[Novel_Order]_{class}_Caudoviricetes	[Novel_Family]_{class}_Caudoviricetes	[Novel_Genus]_{class}_Caudoviricetes	Viruses	0.987	dsDNAphage	1	2	classified	VC20776	FALSE	TRUE	temperate
ma2024imeta	contig033826	contig033826	Duplodnaviria	Heunggongvirae	Uroviricota	Caudoviricetes	[Novel_Order]_{class}_Caudoviricetes	[Novel_Family]_{class}_Caudoviricetes	[Novel_Genus]_{class}_Caudoviricetes	Viruses	1	dsDNAphage	1	4	classified	VC43682	FALSE	TRUE	temperate
ma2024imeta	contig033885	contig033885	Duplodnaviria	Heunggongvirae	Uroviricota	Caudoviricetes	[Novel_Order]_{class}_Caudoviricetes	[Novel_Family]_{class}_Caudoviricetes	[Novel_Genus]_{class}_Caudoviricetes	Viruses	0.993	dsDNAphage	1	1	classified	VC08418	FALSE	TRUE	virulent
ma2024imeta	contig033923	contig033923	Duplodnaviria	Heunggongvirae	Uroviricota	Caudoviricetes	[Novel_Order]_{class}_Caudoviricetes	[Novel_Family]_{class}_Caudoviricetes	[Novel_Genus]_{class}_Caudoviricetes	Viruses	1	dsDNAphage	1	1	classified	VC62069	FALSE	TRUE	virulent
ma2024imeta	contig033925	contig033925	Duplodnaviria	Heunggongvirae	Uroviricota	Caudoviricetes	[Novel_Order]_{class}_Caudoviricetes	[Novel_Family]_{class}_Caudoviricetes	[Novel_Genus]_{class}_Caudoviricetes	Viruses	1	dsDNAphage	1	1	classified	VC18042	FALSE	TRUE	virulent
ma2024imeta	contig033929	contig033929	Duplodnaviria	Heunggongvirae	Uroviricota	Caudoviricetes	[Novel_Order]_{class}_Caudoviricetes	[Novel_Family]_{class}_Caudoviricetes	[Novel_Genus]_{class}_Caudoviricetes	Viruses	1	dsDNAphage	1	1	classified	VC48834	FALSE	TRUE	virulent
ma2024imeta	contig033935	contig033935	Duplodnaviria	Heunggongvirae	Uroviricota	Caudoviricetes	[Novel_Order]_{class}_Caudoviricetes	[Novel_Family]_{class}_Caudoviricetes	[Novel_Genus]_{class}_Caudoviricetes	Viruses	1	dsDNAphage	1	1	classified	VC16774	FALSE	TRUE	virulent
ma2024imeta	contig033943	contig033943	Monodnaviria	Sangervirae	Phixviricota	Malgrandaviricetes	Petitvirales	Microviridae	[Novel_Genus]_{family}_Microviridae	Viruses	1	dsDNAphage	1	1	classified	VC18376	FALSE	TRUE	virulent
ma2024imeta	contig034026	contig034026	Duplodnaviria	Heunggongvirae	Uroviricota	Caudoviricetes	Crassvirales	[Novel_Family]_{order}_Crassvirales	[Novel_Genus]_{order}_Crassvirales	Viruses	1	dsDNAphage	1	4	classified	VC00254	FALSE	TRUE	virulent
ma2024imeta	contig034030	contig034030	Duplodnaviria	Heunggongvirae	Uroviricota	Caudoviricetes	[Novel_Order]_{class}_Caudoviricetes	[Novel_Family]_{class}_Caudoviricetes	[Novel_Genus]_{class}_Caudoviricetes	Viruses	0.987	dsDNAphage	1	3	classified	VC57918	FALSE	TRUE	temperate
ma2024imeta	contig034037	contig034037	Duplodnaviria	Heunggongvirae	Uroviricota	Caudoviricetes	[Novel_Order]_{class}_Caudoviricetes	[Novel_Family]_{class}_Caudoviricetes	[Novel_Genus]_{class}_Caudoviricetes	Viruses	0.993	dsDNAphage	1	1	classified	VC20711	FALSE	TRUE	virulent
ma2024imeta	contig034075	contig034075	Duplodnaviria	Heunggongvirae	Uroviricota	Caudoviricetes	[Novel_Order]_{class}_Caudoviricetes	[Novel_Family]_{class}_Caudoviricetes	[Novel_Genus]_{class}_Caudoviricetes	Viruses	1	dsDNAphage	1	1	classified	VC23718	FALSE	TRUE	temperate
ma2024imeta	contig034082	contig034082	Duplodnaviria	Heunggongvirae	Uroviricota	Caudoviricetes	[Novel_Order]_{class}_Caudoviricetes	[Novel_Family]_{class}_Caudoviricetes	[Novel_Genus]_{class}_Caudoviricetes	Viruses	0.987	dsDNAphage	1	2	classified	VC40795	FALSE	TRUE	virulent
ma2024imeta	contig034113	contig034113	Duplodnaviria	Heunggongvirae	Uroviricota	Caudoviricetes	[Novel_Order]_{class}_Caudoviricetes	[Novel_Family]_{class}_Caudoviricetes	[Novel_Genus]_{class}_Caudoviricetes	Viruses	1	dsDNAphage	1	2	classified	VC16744	FALSE	TRUE	virulent
ma2024imeta	contig034144	contig034144	Duplodnaviria	Heunggongvirae	Uroviricota	Caudoviricetes	[Novel_Order]_{class}_Caudoviricetes	[Novel_Family]_{class}_Caudoviricetes	[Novel_Genus]_{class}_Caudoviricetes	Viruses	1	dsDNAphage	1	2	classified	VC67815	FALSE	TRUE	virulent
ma2024imeta	contig034200	contig034200	Duplodnaviria	Heunggongvirae	Uroviricota	Caudoviricetes	[Novel_Order]_{class}_Caudoviricetes	[Novel_Family]_{class}_Caudoviricetes	[Novel_Genus]_{class}_Caudoviricetes	Viruses	1	dsDNAphage	1	1	classified	VC19937	FALSE	TRUE	virulent
ma2024imeta	contig034289	contig034289	Duplodnaviria	Heunggongvirae	Uroviricota	Caudoviricetes	[Novel_Order]_{class}_Caudoviricetes	[Novel_Family]_{class}_Caudoviricetes	[Novel_Genus]_{class}_Caudoviricetes	Viruses	1	dsDNAphage	1	1	classified	VC43326	FALSE	TRUE	virulent
ma2024imeta	contig034363	contig034363	Duplodnaviria	Heunggongvirae	Uroviricota	Caudoviricetes	[Novel_Order]_{class}_Caudoviricetes	[Novel_Family]_{class}_Caudoviricetes	[Novel_Genus]_{class}_Caudoviricetes	Viruses	0.993	dsDNAphage	1	1	classified	VC22639	FALSE	TRUE	virulent
ma2024imeta	contig034550	contig034550	Duplodnaviria	Heunggongvirae	Uroviricota	Caudoviricetes	[Novel_Order]_{class}_Caudoviricetes	[Novel_Family]_{class}_Caudoviricetes	[Novel_Genus]_{class}_Caudoviricetes	Viruses	0.993	dsDNAphage	1	1	classified	VC61432	FALSE	TRUE	temperate
ma2024imeta	contig034551	contig034551	Duplodnaviria	Heunggongvirae	Uroviricota	Caudoviricetes	[Novel_Order]_{class}_Caudoviricetes	[Novel_Family]_{class}_Caudoviricetes	[Novel_Genus]_{class}_Caudoviricetes	Viruses	1	dsDNAphage	1	1	classified	VC37423	FALSE	TRUE	virulent
ma2024imeta	contig034552	contig034552	Duplodnaviria	Heunggongvirae	Uroviricota	Caudoviricetes	[Novel_Order]_{class}_Caudoviricetes	[Novel_Family]_{class}_Caudoviricetes	[Novel_Genus]_{class}_Caudoviricetes	Viruses	1	dsDNAphage	1	1	classified	VC46729	FALSE	TRUE	virulent
ma2024imeta	contig034560	contig034560	Duplodnaviria	Heunggongvirae	Uroviricota	Caudoviricetes	[Novel_Order]_{class}_Caudoviricetes	[Novel_Family]_{class}_Caudoviricetes	[Novel_Genus]_{class}_Caudoviricetes	Viruses	1	dsDNAphage	1	1	classified	VC59101	FALSE	TRUE	temperate
ma2024imeta	contig034675	contig058499	Duplodnaviria	Heunggongvirae	Uroviricota	Caudoviricetes	[Novel_Order]_{class}_Caudoviricetes	[Novel_Family]_{class}_Caudoviricetes	[Novel_Genus]_{class}_Caudoviricetes	Viruses	1	dsDNAphage	1	1	classified	VC63510	FALSE	TRUE	virulent
ma2024imeta	contig034690	contig034690	Duplodnaviria	Heunggongvirae	Uroviricota	Caudoviricetes	[Novel_Order]_{class}_Caudoviricetes	[Novel_Family]_{class}_Caudoviricetes	[Novel_Genus]_{class}_Caudoviricetes	Viruses	0.993	dsDNAphage	1	1	classified	VC53629	FALSE	TRUE	temperate
ma2024imeta	contig034729	contig034729	Duplodnaviria	Heunggongvirae	Uroviricota	Caudoviricetes	[Novel_Order]_{class}_Caudoviricetes	[Novel_Family]_{class}_Caudoviricetes	[Novel_Genus]_{class}_Caudoviricetes	Viruses	0.993	dsDNAphage	1	2	classified	VC33893	FALSE	TRUE	temperate
ma2024imeta	contig034765	contig034765	Duplodnaviria	Heunggongvirae	Uroviricota	Caudoviricetes	[Novel_Order]_{class}_Caudoviricetes	[Novel_Family]_{class}_Caudoviricetes	[Novel_Genus]_{class}_Caudoviricetes	Viruses	1	dsDNAphage	1	4	classified	VC29963	FALSE	TRUE	virulent
ma2024imeta	contig034838	contig034838	Duplodnaviria	Heunggongvirae	Uroviricota	Caudoviricetes	[Novel_Order]_{class}_Caudoviricetes	[Novel_Family]_{class}_Caudoviricetes	[Novel_Genus]_{class}_Caudoviricetes	Viruses	1	dsDNAphage	1	4	classified	VC74428	FALSE	TRUE	virulent
ma2024imeta	contig034910	contig034910	Duplodnaviria	Heunggongvirae	Uroviricota	Caudoviricetes	[Novel_Order]_{class}_Caudoviricetes	[Novel_Family]_{class}_Caudoviricetes	[Novel_Genus]_{class}_Caudoviricetes	Viruses	1	dsDNAphage	1	3	classified	VC45299	FALSE	TRUE	virulent
ma2024imeta	contig034959	contig034959	Duplodnaviria	Heunggongvirae	Uroviricota	Caudoviricetes	[Novel_Order]_{class}_Caudoviricetes	[Novel_Family]_{class}_Caudoviricetes	[Novel_Genus]_{class}_Caudoviricetes	Viruses	1	dsDNAphage	1	1	classified	VC34027	FALSE	TRUE	temperate
ma2024imeta	contig034964	contig034964	Duplodnaviria	Heunggongvirae	Uroviricota	Caudoviricetes	[Unclassified_Order]_{family}_Peduoviridae	Peduoviridae	[Novel_Genus]_{family}_Peduoviridae	Viruses	0.993	dsDNAphage	1	3	classified	VC58513	FALSE	TRUE	temperate
ma2024imeta	contig034986	contig034986	Duplodnaviria	Heunggongvirae	Uroviricota	Caudoviricetes	[Novel_Order]_{class}_Caudoviricetes	[Novel_Family]_{class}_Caudoviricetes	[Novel_Genus]_{class}_Caudoviricetes	Viruses	0.98	dsDNAphage	1	1	classified	VC52605	FALSE	TRUE	virulent
ma2024imeta	contig035122	contig035122	Duplodnaviria	Heunggongvirae	Uroviricota	Caudoviricetes	[Novel_Order]_{class}_Caudoviricetes	[Novel_Family]_{class}_Caudoviricetes	[Novel_Genus]_{class}_Caudoviricetes	Viruses	1	dsDNAphage	1	1	classified	VC29244	FALSE	TRUE	virulent
ma2024imeta	contig035186	contig035186	Duplodnaviria	Heunggongvirae	Uroviricota	Caudoviricetes	[Novel_Order]_{class}_Caudoviricetes	[Novel_Family]_{class}_Caudoviricetes	[Novel_Genus]_{class}_Caudoviricetes	Viruses	0.993	dsDNAphage	1	1	classified	VC01725	FALSE	TRUE	temperate
ma2024imeta	contig035187	contig132802	Duplodnaviria	Heunggongvirae	Uroviricota	Caudoviricetes	[Novel_Order]_{class}_Caudoviricetes	[Novel_Family]_{class}_Caudoviricetes	[Novel_Genus]_{class}_Caudoviricetes	Viruses	1	dsDNAphage	1	3	classified	VC64803	FALSE	TRUE	temperate
ma2024imeta	contig035413	contig036018	Duplodnaviria	Heunggongvirae	Uroviricota	Caudoviricetes	[Novel_Order]_{class}_Caudoviricetes	[Novel_Family]_{class}_Caudoviricetes	[Novel_Genus]_{class}_Caudoviricetes	Viruses	1	dsDNAphage	1	2	classified	VC69128	FALSE	TRUE	virulent
ma2024imeta	contig035446	contig035446	Duplodnaviria	Heunggongvirae	Uroviricota	Caudoviricetes	[Novel_Order]_{class}_Caudoviricetes	[Novel_Family]_{class}_Caudoviricetes	[Novel_Genus]_{class}_Caudoviricetes	Viruses	1	dsDNAphage	1	2	classified	VC58015	TRUE	FALSE	virulent
ma2024imeta	contig035596	contig038342	Duplodnaviria	Heunggongvirae	Uroviricota	Caudoviricetes	[Novel_Order]_{class}_Caudoviricetes	[Novel_Family]_{class}_Caudoviricetes	[Novel_Genus]_{class}_Caudoviricetes	Viruses	1	dsDNAphage	1	2	classified	VC25390	FALSE	TRUE	temperate
ma2024imeta	contig035750	contig035750	Duplodnaviria	Heunggongvirae	Uroviricota	Caudoviricetes	[Novel_Order]_{class}_Caudoviricetes	[Novel_Family]_{class}_Caudoviricetes	[Novel_Genus]_{class}_Caudoviricetes	Viruses	0.967	dsDNAphage	1	2	classified	VC27604	FALSE	TRUE	virulent
ma2024imeta	contig035872	contig035872	Duplodnaviria	Heunggongvirae	Uroviricota	Caudoviricetes	[Novel_Order]_{class}_Caudoviricetes	[Novel_Family]_{class}_Caudoviricetes	[Novel_Genus]_{class}_Caudoviricetes	Viruses	1	dsDNAphage	1	3	classified	VC61956	FALSE	TRUE	virulent
ma2024imeta	contig035946	contig035946	Duplodnaviria	Heunggongvirae	Uroviricota	Caudoviricetes	[Novel_Order]_{class}_Caudoviricetes	[Novel_Family]_{class}_Caudoviricetes	[Novel_Genus]_{class}_Caudoviricetes	Viruses	0.987	dsDNAphage	1	2	classified	VC30648	FALSE	TRUE	temperate
ma2024imeta	contig035969	contig035969	Duplodnaviria	Heunggongvirae	Uroviricota	Caudoviricetes	[Novel_Order]_{class}_Caudoviricetes	[Novel_Family]_{class}_Caudoviricetes	[Novel_Genus]_{class}_Caudoviricetes	Viruses	1	dsDNAphage	1	1	classified	VC18046	FALSE	TRUE	virulent
ma2024imeta	contig036022	contig036022	Duplodnaviria	Heunggongvirae	Uroviricota	Caudoviricetes	[Novel_Order]_{class}_Caudoviricetes	[Novel_Family]_{class}_Caudoviricetes	[Novel_Genus]_{class}_Caudoviricetes	Viruses	1	dsDNAphage	1	1	classified	VC17949	FALSE	TRUE	virulent
ma2024imeta	contig036179	contig036179	Duplodnaviria	Heunggongvirae	Uroviricota	Caudoviricetes	[Novel_Order]_{class}_Caudoviricetes	[Novel_Family]_{class}_Caudoviricetes	[Novel_Genus]_{class}_Caudoviricetes	Viruses	0.987	dsDNAphage	1	3	classified	VC38299	FALSE	TRUE	temperate
ma2024imeta	contig036278	contig036278	Duplodnaviria	Heunggongvirae	Uroviricota	Caudoviricetes	[Novel_Order]_{class}_Caudoviricetes	[Novel_Family]_{class}_Caudoviricetes	[Novel_Genus]_{class}_Caudoviricetes	Viruses	1	dsDNAphage	1	1	classified	VC20710	FALSE	TRUE	virulent
ma2024imeta	contig036315	contig036315	Duplodnaviria	Heunggongvirae	Uroviricota	Caudoviricetes	[Novel_Order]_{class}_Caudoviricetes	[Novel_Family]_{class}_Caudoviricetes	[Novel_Genus]_{class}_Caudoviricetes	Viruses	0.987	dsDNAphage	1	1	classified	VC25552	FALSE	TRUE	temperate
ma2024imeta	contig036331	contig036331	Duplodnaviria	Heunggongvirae	Uroviricota	Caudoviricetes	[Novel_Order]_{class}_Caudoviricetes	[Novel_Family]_{class}_Caudoviricetes	[Novel_Genus]_{class}_Caudoviricetes	Viruses	0.987	dsDNAphage	1	3	classified	VC48810	FALSE	TRUE	virulent
ma2024imeta	contig036518	contig036518	Duplodnaviria	Heunggongvirae	Uroviricota	Caudoviricetes	[Novel_Order]_{class}_Caudoviricetes	[Novel_Family]_{class}_Caudoviricetes	[Novel_Genus]_{class}_Caudoviricetes	Viruses	1	dsDNAphage	1	1	classified	VC48553	FALSE	TRUE	virulent
ma2024imeta	contig036521	contig278266	Duplodnaviria	Heunggongvirae	Uroviricota	Caudoviricetes	[Novel_Order]_{class}_Caudoviricetes	[Novel_Family]_{class}_Caudoviricetes	[Novel_Genus]_{class}_Caudoviricetes	Viruses	1	dsDNAphage	1	1	classified	VC61449	FALSE	TRUE	temperate
ma2024imeta	contig036527	contig036527	Duplodnaviria	Heunggongvirae	Uroviricota	Caudoviricetes	[Novel_Order]_{class}_Caudoviricetes	[Novel_Family]_{class}_Caudoviricetes	[Novel_Genus]_{class}_Caudoviricetes	Viruses	1	dsDNAphage	1	1	classified	VC38229	FALSE	TRUE	temperate
ma2024imeta	contig036626	contig036626	Duplodnaviria	Heunggongvirae	Uroviricota	Caudoviricetes	[Novel_Order]_{class}_Caudoviricetes	[Novel_Family]_{class}_Caudoviricetes	[Novel_Genus]_{class}_Caudoviricetes	Viruses	0.987	dsDNAphage	1	1	classified	VC26969	FALSE	TRUE	virulent
ma2024imeta	contig036707	contig036707	Duplodnaviria	Heunggongvirae	Uroviricota	Caudoviricetes	[Novel_Order]_{class}_Caudoviricetes	[Novel_Family]_{class}_Caudoviricetes	[Novel_Genus]_{class}_Caudoviricetes	Viruses	1	dsDNAphage	1	1	classified	VC24431	FALSE	TRUE	temperate
ma2024imeta	contig036769	contig036769	Duplodnaviria	Heunggongvirae	Uroviricota	Caudoviricetes	[Novel_Order]_{class}_Caudoviricetes	[Novel_Family]_{class}_Caudoviricetes	[Novel_Genus]_{class}_Caudoviricetes	Viruses	1	dsDNAphage	1	1	classified	VC67688	FALSE	TRUE	virulent
ma2024imeta	contig036945	contig036945	Duplodnaviria	Heunggongvirae	Uroviricota	Caudoviricetes	[Novel_Order]_{class}_Caudoviricetes	[Novel_Family]_{class}_Caudoviricetes	[Novel_Genus]_{class}_Caudoviricetes	Viruses	1	dsDNAphage	1	4	classified	VC61577	FALSE	TRUE	virulent
ma2024imeta	contig037070	contig037070	Duplodnaviria	Heunggongvirae	Uroviricota	Caudoviricetes	[Novel_Order]_{class}_Caudoviricetes	[Novel_Family]_{class}_Caudoviricetes	[Novel_Genus]_{class}_Caudoviricetes	Viruses	1	dsDNAphage	1	1	classified	VC61713	FALSE	TRUE	temperate
ma2024imeta	contig037072	contig037072	Duplodnaviria	Heunggongvirae	Uroviricota	Caudoviricetes	[Novel_Order]_{class}_Caudoviricetes	[Novel_Family]_{class}_Caudoviricetes	[Novel_Genus]_{class}_Caudoviricetes	Viruses	1	dsDNAphage	1	1	classified	VC34300	FALSE	TRUE	temperate
ma2024imeta	contig037073	contig037073	Duplodnaviria	Heunggongvirae	Uroviricota	Caudoviricetes	[Novel_Order]_{class}_Caudoviricetes	[Novel_Family]_{class}_Caudoviricetes	[Novel_Genus]_{class}_Caudoviricetes	Viruses	1	dsDNAphage	1	1	classified	VC43670	FALSE	TRUE	temperate
ma2024imeta	contig037079	contig037079	Duplodnaviria	Heunggongvirae	Uroviricota	Caudoviricetes	[Novel_Order]_{class}_Caudoviricetes	[Novel_Family]_{class}_Caudoviricetes	[Novel_Genus]_{class}_Caudoviricetes	Viruses	0.987	dsDNAphage	1	1	classified	VC43695	FALSE	TRUE	temperate
ma2024imeta	contig037081	contig037081	Duplodnaviria	Heunggongvirae	Uroviricota	Caudoviricetes	[Novel_Order]_{class}_Caudoviricetes	[Novel_Family]_{class}_Caudoviricetes	[Novel_Genus]_{class}_Caudoviricetes	Viruses	0.987	dsDNAphage	1	1	classified	VC26147	FALSE	TRUE	temperate
ma2024imeta	contig037083	contig037083	Duplodnaviria	Heunggongvirae	Uroviricota	Caudoviricetes	[Novel_Order]_{class}_Caudoviricetes	[Novel_Family]_{class}_Caudoviricetes	[Novel_Genus]_{class}_Caudoviricetes	Viruses	0.98	dsDNAphage	1	1	classified	VC40891	FALSE	TRUE	temperate
ma2024imeta	contig037088	contig037088	Duplodnaviria	Heunggongvirae	Uroviricota	Caudoviricetes	Crassvirales	Steigviridae	[Novel_Genus]_{family}_Steigviridae	Viruses	1	dsDNAphage	1	1	classified	VC00174	FALSE	TRUE	virulent
ma2024imeta	contig037094	contig037094	Duplodnaviria	Heunggongvirae	Uroviricota	Caudoviricetes	[Novel_Order]_{class}_Caudoviricetes	[Novel_Family]_{class}_Caudoviricetes	[Novel_Genus]_{class}_Caudoviricetes	Viruses	1	dsDNAphage	1	4	classified	VC64459	FALSE	TRUE	temperate
ma2024imeta	contig037157	contig037157	Duplodnaviria	Heunggongvirae	Uroviricota	Caudoviricetes	[Novel_Order]_{class}_Caudoviricetes	[Novel_Family]_{class}_Caudoviricetes	[Novel_Genus]_{class}_Caudoviricetes	Viruses	1	dsDNAphage	1	3	classified	VC04827	FALSE	TRUE	virulent
ma2024imeta	contig037208	contig037208	Duplodnaviria	Heunggongvirae	Uroviricota	Caudoviricetes	[Unclassified_Order]_{genus}_Lambdavirus	[Unclassified_Family]_{genus}_Lambdavirus	Lambdavirus	Viruses	1	dsDNAphage	1	2	classified	VC72773	TRUE	FALSE	temperate
ma2024imeta	contig037332	contig037332	Duplodnaviria	Heunggongvirae	Uroviricota	Caudoviricetes	[Novel_Order]_{class}_Caudoviricetes	[Novel_Family]_{class}_Caudoviricetes	[Novel_Genus]_{class}_Caudoviricetes	Viruses	0.98	dsDNAphage	1	1	classified	VC38184	FALSE	TRUE	virulent
ma2024imeta	contig037401	contig037401	Duplodnaviria	Heunggongvirae	Uroviricota	Caudoviricetes	[Novel_Order]_{class}_Caudoviricetes	[Novel_Family]_{class}_Caudoviricetes	[Novel_Genus]_{class}_Caudoviricetes	Viruses	1	dsDNAphage	1	1	classified	VC40757	FALSE	TRUE	temperate
ma2024imeta	contig037424	contig037424	Monodnaviria	Sangervirae	Phixviricota	Malgrandaviricetes	Petitvirales	Microviridae	[Novel_Genus]_{family}_Microviridae	Viruses	1	dsDNAphage	1	4	unclassified	VC77601	FALSE	FALSE	virulent
ma2024imeta	contig037555	contig037555	Duplodnaviria	Heunggongvirae	Uroviricota	Caudoviricetes	[Novel_Order]_{class}_Caudoviricetes	[Novel_Family]_{class}_Caudoviricetes	[Novel_Genus]_{class}_Caudoviricetes	Viruses	1	dsDNAphage	1	2	classified	VC46012	FALSE	TRUE	virulent
ma2024imeta	contig037869	contig037869	Duplodnaviria	Heunggongvirae	Uroviricota	Caudoviricetes	[Novel_Order]_{class}_Caudoviricetes	[Novel_Family]_{class}_Caudoviricetes	[Novel_Genus]_{class}_Caudoviricetes	Viruses	1	dsDNAphage	1	2	classified	VC67659	FALSE	TRUE	virulent
ma2024imeta	contig037944	contig037944	Duplodnaviria	Heunggongvirae	Uroviricota	Caudoviricetes	[Novel_Order]_{class}_Caudoviricetes	[Novel_Family]_{class}_Caudoviricetes	[Novel_Genus]_{class}_Caudoviricetes	Viruses	1	dsDNAphage	1	1	classified	VC32084	FALSE	TRUE	temperate
ma2024imeta	contig037946	contig037946	Duplodnaviria	Heunggongvirae	Uroviricota	Caudoviricetes	[Novel_Order]_{class}_Caudoviricetes	[Novel_Family]_{class}_Caudoviricetes	[Novel_Genus]_{class}_Caudoviricetes	Viruses	1	dsDNAphage	1	1	classified	VC68906	FALSE	TRUE	virulent
ma2024imeta	contig037966	contig037966	Duplodnaviria	Heunggongvirae	Uroviricota	Caudoviricetes	[Novel_Order]_{class}_Caudoviricetes	[Novel_Family]_{class}_Caudoviricetes	[Novel_Genus]_{class}_Caudoviricetes	Viruses	1	dsDNAphage	1	1	classified	VC27021	FALSE	TRUE	virulent
ma2024imeta	contig038076	contig038076	Duplodnaviria	Heunggongvirae	Uroviricota	Caudoviricetes	[Novel_Order]_{class}_Caudoviricetes	[Novel_Family]_{class}_Caudoviricetes	[Novel_Genus]_{class}_Caudoviricetes	Viruses	1	dsDNAphage	1	2	classified	VC03769	FALSE	TRUE	virulent
ma2024imeta	contig038182	contig038182	Duplodnaviria	Heunggongvirae	Uroviricota	Caudoviricetes	[Novel_Order]_{class}_Caudoviricetes	[Novel_Family]_{class}_Caudoviricetes	[Novel_Genus]_{class}_Caudoviricetes	Viruses	1	dsDNAphage	1	1	classified	VC29678	FALSE	TRUE	virulent
ma2024imeta	contig038225	contig038225	Duplodnaviria	Heunggongvirae	Uroviricota	Caudoviricetes	[Novel_Order]_{class}_Caudoviricetes	[Novel_Family]_{class}_Caudoviricetes	[Novel_Genus]_{class}_Caudoviricetes	Viruses	0.98	dsDNAphage	1	2	classified	VC36588	FALSE	TRUE	temperate
ma2024imeta	contig038265	contig038265	Duplodnaviria	Heunggongvirae	Uroviricota	Caudoviricetes	[Novel_Order]_{class}_Caudoviricetes	[Novel_Family]_{class}_Caudoviricetes	[Novel_Genus]_{class}_Caudoviricetes	Viruses	0.987	dsDNAphage	1	1	classified	VC25541	FALSE	TRUE	virulent
ma2024imeta	contig038393	contig038393	Duplodnaviria	Heunggongvirae	Uroviricota	Caudoviricetes	[Novel_Order]_{class}_Caudoviricetes	[Novel_Family]_{class}_Caudoviricetes	[Novel_Genus]_{class}_Caudoviricetes	Viruses	0.987	dsDNAphage	1	1	classified	VC26893	FALSE	TRUE	temperate
ma2024imeta	contig038397	contig038397	Duplodnaviria	Heunggongvirae	Uroviricota	Caudoviricetes	[Novel_Order]_{class}_Caudoviricetes	[Novel_Family]_{class}_Caudoviricetes	[Novel_Genus]_{class}_Caudoviricetes	Viruses	0.987	dsDNAphage	1	1	classified	VC23540	FALSE	TRUE	temperate
ma2024imeta	contig038493	contig038493	Duplodnaviria	Heunggongvirae	Uroviricota	Caudoviricetes	[Novel_Order]_{class}_Caudoviricetes	[Novel_Family]_{class}_Caudoviricetes	[Novel_Genus]_{class}_Caudoviricetes	Viruses	0.973	dsDNAphage	1	3	classified	VC02423	FALSE	TRUE	temperate
ma2024imeta	contig038693	contig038693	Duplodnaviria	Heunggongvirae	Uroviricota	Caudoviricetes	[Novel_Order]_{class}_Caudoviricetes	[Novel_Family]_{class}_Caudoviricetes	[Novel_Genus]_{class}_Caudoviricetes	Viruses	0.993	dsDNAphage	1	1	classified	VC27632	FALSE	TRUE	virulent
ma2024imeta	contig038742	contig038742	Duplodnaviria	Heunggongvirae	Uroviricota	Caudoviricetes	[Novel_Order]_{class}_Caudoviricetes	[Novel_Family]_{class}_Caudoviricetes	[Novel_Genus]_{class}_Caudoviricetes	Viruses	0.993	dsDNAphage	1	1	classified	VC34888	FALSE	TRUE	virulent
ma2024imeta	contig038967	contig038967	Duplodnaviria	Heunggongvirae	Uroviricota	Caudoviricetes	[Novel_Order]_{class}_Caudoviricetes	[Novel_Family]_{class}_Caudoviricetes	[Novel_Genus]_{class}_Caudoviricetes	Viruses	0.987	dsDNAphage	1	1	classified	VC23523	FALSE	TRUE	temperate
ma2024imeta	contig039140	contig039140	Duplodnaviria	Heunggongvirae	Uroviricota	Caudoviricetes	[Novel_Order]_{class}_Caudoviricetes	[Novel_Family]_{class}_Caudoviricetes	[Novel_Genus]_{class}_Caudoviricetes	Viruses	1	dsDNAphage	1	3	classified	VC53035	FALSE	TRUE	virulent
ma2024imeta	contig039177	contig039177	Duplodnaviria	Heunggongvirae	Uroviricota	Caudoviricetes	[Novel_Order]_{class}_Caudoviricetes	[Novel_Family]_{class}_Caudoviricetes	[Novel_Genus]_{class}_Caudoviricetes	Viruses	1	dsDNAphage	1	3	classified	VC61590	FALSE	TRUE	virulent
ma2024imeta	contig039262	contig039262	Monodnaviria	Sangervirae	Phixviricota	Malgrandaviricetes	Petitvirales	Microviridae	[Novel_Genus]_{family}_Microviridae	Viruses	0.993	dsDNAphage	1	4	unclassified	VC78405	FALSE	FALSE	virulent
ma2024imeta	contig039349	contig039349	Duplodnaviria	Heunggongvirae	Uroviricota	Caudoviricetes	[Novel_Order]_{class}_Caudoviricetes	[Novel_Family]_{class}_Caudoviricetes	[Novel_Genus]_{class}_Caudoviricetes	Viruses	1	dsDNAphage	1	4	classified	VC75307	FALSE	TRUE	virulent
ma2024imeta	contig039360	contig039360	Duplodnaviria	Heunggongvirae	Uroviricota	Caudoviricetes	[Novel_Order]_{class}_Caudoviricetes	[Novel_Family]_{class}_Caudoviricetes	[Novel_Genus]_{class}_Caudoviricetes	Viruses	0.987	dsDNAphage	1	1	classified	VC46717	FALSE	TRUE	virulent
ma2024imeta	contig039432	contig039432	Duplodnaviria	Heunggongvirae	Uroviricota	Caudoviricetes	[Novel_Order]_{class}_Caudoviricetes	[Novel_Family]_{class}_Caudoviricetes	[Novel_Genus]_{class}_Caudoviricetes	Viruses	0.987	dsDNAphage	1	3	classified	VC31959	FALSE	TRUE	temperate
ma2024imeta	contig039449	contig039449	Monodnaviria	Sangervirae	Phixviricota	Malgrandaviricetes	Petitvirales	Microviridae	[Novel_Genus]_{family}_Microviridae	Viruses	0.96	dsDNAphage	1	4	unclassified	VC77602	FALSE	FALSE	virulent
ma2024imeta	contig039691	contig039691	Duplodnaviria	Heunggongvirae	Uroviricota	Caudoviricetes	[Novel_Order]_{class}_Caudoviricetes	[Novel_Family]_{class}_Caudoviricetes	[Novel_Genus]_{class}_Caudoviricetes	Viruses	0.993	dsDNAphage	1	1	classified	VC48481	FALSE	TRUE	temperate
ma2024imeta	contig039779	contig039779	Duplodnaviria	Heunggongvirae	Uroviricota	Caudoviricetes	[Novel_Order]_{class}_Caudoviricetes	[Novel_Family]_{class}_Caudoviricetes	[Novel_Genus]_{class}_Caudoviricetes	Viruses	0.993	dsDNAphage	1	3	classified	VC66026	FALSE	TRUE	virulent
ma2024imeta	contig039844	contig039844	Duplodnaviria	Heunggongvirae	Uroviricota	Caudoviricetes	[Novel_Order]_{class}_Caudoviricetes	[Novel_Family]_{class}_Caudoviricetes	[Novel_Genus]_{class}_Caudoviricetes	Viruses	1	dsDNAphage	1	3	classified	VC25454	FALSE	TRUE	virulent
ma2024imeta	contig039879	contig039879	Duplodnaviria	Heunggongvirae	Uroviricota	Caudoviricetes	[Novel_Order]_{class}_Caudoviricetes	[Novel_Family]_{class}_Caudoviricetes	[Novel_Genus]_{class}_Caudoviricetes	Viruses	0.987	dsDNAphage	1	4	classified	VC55994	FALSE	TRUE	virulent
ma2024imeta	contig040078	contig040078	Duplodnaviria	Heunggongvirae	Uroviricota	Caudoviricetes	[Novel_Order]_{class}_Caudoviricetes	[Novel_Family]_{class}_Caudoviricetes	[Novel_Genus]_{class}_Caudoviricetes	Viruses	1	dsDNAphage	1	1	classified	VC27567	FALSE	TRUE	virulent
ma2024imeta	contig040089	contig040089	Duplodnaviria	Heunggongvirae	Uroviricota	Caudoviricetes	[Novel_Order]_{class}_Caudoviricetes	[Novel_Family]_{class}_Caudoviricetes	[Novel_Genus]_{class}_Caudoviricetes	Viruses	1	dsDNAphage	1	1	classified	VC66079	FALSE	TRUE	temperate
ma2024imeta	contig040104	contig040104	Duplodnaviria	Heunggongvirae	Uroviricota	Caudoviricetes	[Novel_Order]_{class}_Caudoviricetes	[Novel_Family]_{class}_Caudoviricetes	[Novel_Genus]_{class}_Caudoviricetes	Viruses	0.98	dsDNAphage	1	1	classified	VC35968	FALSE	TRUE	temperate
ma2024imeta	contig040114	contig040114	Duplodnaviria	Heunggongvirae	Uroviricota	Caudoviricetes	[Novel_Order]_{class}_Caudoviricetes	[Novel_Family]_{class}_Caudoviricetes	[Novel_Genus]_{class}_Caudoviricetes	Viruses	1	dsDNAphage	1	1	classified	VC63011	FALSE	TRUE	temperate
ma2024imeta	contig040148	contig040148	Duplodnaviria	Heunggongvirae	Uroviricota	Caudoviricetes	[Novel_Order]_{class}_Caudoviricetes	[Novel_Family]_{class}_Caudoviricetes	[Novel_Genus]_{class}_Caudoviricetes	Viruses	1	dsDNAphage	1	4	classified	VC41207	FALSE	TRUE	temperate
ma2024imeta	contig040153	contig040153	Duplodnaviria	Heunggongvirae	Uroviricota	Caudoviricetes	[Novel_Order]_{class}_Caudoviricetes	[Novel_Family]_{class}_Caudoviricetes	[Novel_Genus]_{class}_Caudoviricetes	Viruses	0.98	dsDNAphage	1	1	classified	VC32689	FALSE	TRUE	temperate
ma2024imeta	contig040217	contig040217	Duplodnaviria	Heunggongvirae	Uroviricota	Caudoviricetes	[Novel_Order]_{class}_Caudoviricetes	[Novel_Family]_{class}_Caudoviricetes	[Novel_Genus]_{class}_Caudoviricetes	Viruses	1	dsDNAphage	1	1	classified	VC66057	FALSE	TRUE	virulent
ma2024imeta	contig040222	contig040222	Duplodnaviria	Heunggongvirae	Uroviricota	Caudoviricetes	[Novel_Order]_{class}_Caudoviricetes	[Novel_Family]_{class}_Caudoviricetes	[Novel_Genus]_{class}_Caudoviricetes	Viruses	1	dsDNAphage	1	1	classified	VC62071	FALSE	TRUE	virulent
ma2024imeta	contig040224	contig272286	Duplodnaviria	Heunggongvirae	Uroviricota	Caudoviricetes	[Novel_Order]_{class}_Caudoviricetes	[Novel_Family]_{class}_Caudoviricetes	[Novel_Genus]_{class}_Caudoviricetes	Viruses	1	dsDNAphage	1	1	classified	VC14765	FALSE	TRUE	virulent
ma2024imeta	contig040225	contig040225	Duplodnaviria	Heunggongvirae	Uroviricota	Caudoviricetes	[Novel_Order]_{class}_Caudoviricetes	[Novel_Family]_{class}_Caudoviricetes	[Novel_Genus]_{class}_Caudoviricetes	Viruses	1	dsDNAphage	1	1	classified	VC38267	FALSE	TRUE	temperate
ma2024imeta	contig040227	contig040227	Duplodnaviria	Heunggongvirae	Uroviricota	Caudoviricetes	[Novel_Order]_{class}_Caudoviricetes	[Novel_Family]_{class}_Caudoviricetes	[Novel_Genus]_{class}_Caudoviricetes	Viruses	1	dsDNAphage	1	1	classified	VC27142	FALSE	TRUE	virulent
ma2024imeta	contig040231	contig047693	Duplodnaviria	Heunggongvirae	Uroviricota	Caudoviricetes	[Novel_Order]_{class}_Caudoviricetes	[Novel_Family]_{class}_Caudoviricetes	[Novel_Genus]_{class}_Caudoviricetes	Viruses	0.993	dsDNAphage	1	1	classified	VC20327	FALSE	TRUE	temperate
ma2024imeta	contig040233	contig040233	Duplodnaviria	Heunggongvirae	Uroviricota	Caudoviricetes	[Novel_Order]_{class}_Caudoviricetes	[Novel_Family]_{class}_Caudoviricetes	[Novel_Genus]_{class}_Caudoviricetes	Viruses	1	dsDNAphage	1	1	classified	VC68120	FALSE	TRUE	virulent
ma2024imeta	contig040236	contig040236	Duplodnaviria	Heunggongvirae	Uroviricota	Caudoviricetes	[Novel_Order]_{class}_Caudoviricetes	[Novel_Family]_{class}_Caudoviricetes	[Novel_Genus]_{class}_Caudoviricetes	Viruses	0.993	dsDNAphage	1	1	classified	VC29948	FALSE	TRUE	virulent
ma2024imeta	contig040237	contig040237	Duplodnaviria	Heunggongvirae	Uroviricota	Caudoviricetes	[Novel_Order]_{class}_Caudoviricetes	[Novel_Family]_{class}_Caudoviricetes	[Novel_Genus]_{class}_Caudoviricetes	Viruses	1	dsDNAphage	1	1	classified	VC27102	FALSE	TRUE	virulent
ma2024imeta	contig040238	contig040238	Duplodnaviria	Heunggongvirae	Uroviricota	Caudoviricetes	[Novel_Order]_{class}_Caudoviricetes	[Novel_Family]_{class}_Caudoviricetes	[Novel_Genus]_{class}_Caudoviricetes	Viruses	0.987	dsDNAphage	1	1	classified	VC56174	FALSE	TRUE	virulent
ma2024imeta	contig040239	contig040239	Duplodnaviria	Heunggongvirae	Uroviricota	Caudoviricetes	[Novel_Order]_{class}_Caudoviricetes	[Novel_Family]_{class}_Caudoviricetes	[Novel_Genus]_{class}_Caudoviricetes	Viruses	0.987	dsDNAphage	1	1	classified	VC24773	FALSE	TRUE	temperate
ma2024imeta	contig040240	contig040240	Duplodnaviria	Heunggongvirae	Uroviricota	Caudoviricetes	[Novel_Order]_{class}_Caudoviricetes	[Novel_Family]_{class}_Caudoviricetes	[Novel_Genus]_{class}_Caudoviricetes	Viruses	0.993	dsDNAphage	1	1	classified	VC68122	FALSE	TRUE	virulent
ma2024imeta	contig040242	contig040242	Monodnaviria	Sangervirae	Phixviricota	Malgrandaviricetes	Petitvirales	Microviridae	[Novel_Genus]_{family}_Microviridae	Viruses	1	dsDNAphage	1	1	unclassified	VC77603	FALSE	FALSE	virulent
ma2024imeta	contig040243	contig040243	Monodnaviria	Sangervirae	Phixviricota	Malgrandaviricetes	Petitvirales	Microviridae	[Novel_Genus]_{family}_Microviridae	Viruses	1	dsDNAphage	1	1	classified	VC02449	FALSE	TRUE	virulent
ma2024imeta	contig040248	contig040248	Monodnaviria	Sangervirae	Phixviricota	Malgrandaviricetes	Petitvirales	Microviridae	[Novel_Genus]_{family}_Microviridae	Viruses	1	dsDNAphage	1	1	unclassified	VC77604	FALSE	FALSE	virulent
ma2024imeta	contig040270	contig040270	Duplodnaviria	Heunggongvirae	Uroviricota	Caudoviricetes	[Novel_Order]_{class}_Caudoviricetes	[Novel_Family]_{class}_Caudoviricetes	[Novel_Genus]_{class}_Caudoviricetes	Viruses	1	dsDNAphage	1	2	classified	VC21824	FALSE	TRUE	virulent
ma2024imeta	contig040293	contig040293	Duplodnaviria	Heunggongvirae	Uroviricota	Caudoviricetes	[Novel_Order]_{class}_Caudoviricetes	[Novel_Family]_{class}_Caudoviricetes	[Novel_Genus]_{class}_Caudoviricetes	Viruses	1	dsDNAphage	1	1	classified	VC26487	FALSE	TRUE	virulent
ma2024imeta	contig040393	contig040393	Duplodnaviria	Heunggongvirae	Uroviricota	Caudoviricetes	[Novel_Order]_{class}_Caudoviricetes	[Novel_Family]_{class}_Caudoviricetes	[Novel_Genus]_{class}_Caudoviricetes	Viruses	0.993	dsDNAphage	1	3	classified	VC38551	FALSE	TRUE	temperate
ma2024imeta	contig040468	contig040468	Duplodnaviria	Heunggongvirae	Uroviricota	Caudoviricetes	[Novel_Order]_{class}_Caudoviricetes	[Novel_Family]_{class}_Caudoviricetes	[Novel_Genus]_{class}_Caudoviricetes	Viruses	0.993	dsDNAphage	1	1	classified	VC67179	FALSE	TRUE	virulent
ma2024imeta	contig040492	contig040492	Duplodnaviria	Heunggongvirae	Uroviricota	Caudoviricetes	[Novel_Order]_{class}_Caudoviricetes	[Novel_Family]_{class}_Caudoviricetes	[Novel_Genus]_{class}_Caudoviricetes	Viruses	0.98	dsDNAphage	1	2	classified	VC51393	FALSE	TRUE	virulent
ma2024imeta	contig040516	contig040516	Duplodnaviria	Heunggongvirae	Uroviricota	Caudoviricetes	[Novel_Order]_{class}_Caudoviricetes	[Novel_Family]_{class}_Caudoviricetes	[Novel_Genus]_{class}_Caudoviricetes	Viruses	1	dsDNAphage	1	3	classified	VC20326	FALSE	TRUE	temperate
ma2024imeta	contig040533	contig040533	Duplodnaviria	Heunggongvirae	Uroviricota	Caudoviricetes	[Novel_Order]_{class}_Caudoviricetes	[Novel_Family]_{class}_Caudoviricetes	[Novel_Genus]_{class}_Caudoviricetes	Viruses	0.987	dsDNAphage	1	4	classified	VC64822	FALSE	TRUE	virulent
ma2024imeta	contig040594	contig040594	Duplodnaviria	Heunggongvirae	Uroviricota	Caudoviricetes	[Novel_Order]_{class}_Caudoviricetes	[Novel_Family]_{class}_Caudoviricetes	[Novel_Genus]_{class}_Caudoviricetes	Viruses	0.993	dsDNAphage	1	3	classified	VC57918	FALSE	TRUE	temperate
ma2024imeta	contig040661	contig040661	Duplodnaviria	Heunggongvirae	Uroviricota	Caudoviricetes	[Novel_Order]_{class}_Caudoviricetes	[Novel_Family]_{class}_Caudoviricetes	[Novel_Genus]_{class}_Caudoviricetes	Viruses	1	dsDNAphage	1	1	classified	VC20264	FALSE	TRUE	temperate
ma2024imeta	contig040662	contig040662	Duplodnaviria	Heunggongvirae	Uroviricota	Caudoviricetes	[Novel_Order]_{class}_Caudoviricetes	[Novel_Family]_{class}_Caudoviricetes	[Novel_Genus]_{class}_Caudoviricetes	Viruses	0.973	dsDNAphage	1	1	classified	VC27070	FALSE	TRUE	virulent
ma2024imeta	contig040665	contig040665	Duplodnaviria	Heunggongvirae	Uroviricota	Caudoviricetes	[Novel_Order]_{class}_Caudoviricetes	[Novel_Family]_{class}_Caudoviricetes	[Novel_Genus]_{class}_Caudoviricetes	Viruses	0.993	dsDNAphage	1	1	classified	VC44955	FALSE	TRUE	temperate
ma2024imeta	contig040667	contig040667	Duplodnaviria	Heunggongvirae	Uroviricota	Caudoviricetes	[Novel_Order]_{class}_Caudoviricetes	[Novel_Family]_{class}_Caudoviricetes	[Novel_Genus]_{class}_Caudoviricetes	Viruses	0.993	dsDNAphage	1	1	classified	VC33567	FALSE	TRUE	temperate
ma2024imeta	contig040758	contig040758	Duplodnaviria	Heunggongvirae	Uroviricota	Caudoviricetes	[Novel_Order]_{class}_Caudoviricetes	[Novel_Family]_{class}_Caudoviricetes	[Novel_Genus]_{class}_Caudoviricetes	Viruses	1	dsDNAphage	1	4	classified	VC75316	FALSE	TRUE	virulent
ma2024imeta	contig040779	contig040779	Duplodnaviria	Heunggongvirae	Uroviricota	Caudoviricetes	[Novel_Order]_{class}_Caudoviricetes	[Novel_Family]_{class}_Caudoviricetes	[Novel_Genus]_{class}_Caudoviricetes	Viruses	0.973	dsDNAphage	1	4	classified	VC60283	FALSE	TRUE	temperate
ma2024imeta	contig040787	contig040787	Duplodnaviria	Heunggongvirae	Uroviricota	Caudoviricetes	[Novel_Order]_{class}_Caudoviricetes	[Novel_Family]_{class}_Caudoviricetes	[Novel_Genus]_{class}_Caudoviricetes	Viruses	1	dsDNAphage	1	3	classified	VC20285	FALSE	TRUE	temperate
ma2024imeta	contig040798	contig040798	Duplodnaviria	Heunggongvirae	Uroviricota	Caudoviricetes	[Novel_Order]_{class}_Caudoviricetes	[Novel_Family]_{class}_Caudoviricetes	[Novel_Genus]_{class}_Caudoviricetes	Viruses	0.973	dsDNAphage	1	1	classified	VC33020	FALSE	TRUE	temperate
ma2024imeta	contig040820	contig040820	Duplodnaviria	Heunggongvirae	Uroviricota	Caudoviricetes	[Novel_Order]_{class}_Caudoviricetes	[Novel_Family]_{class}_Caudoviricetes	[Novel_Genus]_{class}_Caudoviricetes	Viruses	1	dsDNAphage	1	1	classified	VC37424	FALSE	TRUE	temperate
ma2024imeta	contig040864	contig040864	Duplodnaviria	Heunggongvirae	Uroviricota	Caudoviricetes	[Novel_Order]_{class}_Caudoviricetes	[Novel_Family]_{class}_Caudoviricetes	[Novel_Genus]_{class}_Caudoviricetes	Viruses	1	dsDNAphage	1	1	classified	VC25132	FALSE	TRUE	temperate
ma2024imeta	contig040870	contig040870	Duplodnaviria	Heunggongvirae	Uroviricota	Caudoviricetes	[Novel_Order]_{class}_Caudoviricetes	[Novel_Family]_{class}_Caudoviricetes	[Novel_Genus]_{class}_Caudoviricetes	Viruses	1	dsDNAphage	1	1	classified	VC23721	FALSE	TRUE	virulent
ma2024imeta	contig040871	contig040871	Duplodnaviria	Heunggongvirae	Uroviricota	Caudoviricetes	[Novel_Order]_{class}_Caudoviricetes	[Novel_Family]_{class}_Caudoviricetes	[Novel_Genus]_{class}_Caudoviricetes	Viruses	0.993	dsDNAphage	1	1	classified	VC27631	FALSE	TRUE	virulent
ma2024imeta	contig040989	contig040989	Duplodnaviria	Heunggongvirae	Uroviricota	Caudoviricetes	[Novel_Order]_{class}_Caudoviricetes	[Novel_Family]_{class}_Caudoviricetes	[Novel_Genus]_{class}_Caudoviricetes	Viruses	0.993	dsDNAphage	1	1	classified	VC25392	FALSE	TRUE	temperate
ma2024imeta	contig041014	contig041014	Monodnaviria	Sangervirae	Phixviricota	Malgrandaviricetes	Petitvirales	Microviridae	[Novel_Genus]_{family}_Microviridae	Viruses	0.987	dsDNAphage	1	4	unclassified	VC77605	FALSE	FALSE	virulent
ma2024imeta	contig041059	contig054574	Duplodnaviria	Heunggongvirae	Uroviricota	Caudoviricetes	[Novel_Order]_{class}_Caudoviricetes	[Novel_Family]_{class}_Caudoviricetes	[Novel_Genus]_{class}_Caudoviricetes	Viruses	0.993	dsDNAphage	1	4	classified	VC75311	FALSE	TRUE	virulent
ma2024imeta	contig041112	contig041112	Duplodnaviria	Heunggongvirae	Uroviricota	Caudoviricetes	[Novel_Order]_{class}_Caudoviricetes	[Novel_Family]_{class}_Caudoviricetes	[Novel_Genus]_{class}_Caudoviricetes	Viruses	0.967	dsDNAphage	1	1	classified	VC37844	FALSE	TRUE	temperate
ma2024imeta	contig041254	contig041254	Duplodnaviria	Heunggongvirae	Uroviricota	Caudoviricetes	[Novel_Order]_{class}_Caudoviricetes	[Novel_Family]_{class}_Caudoviricetes	[Novel_Genus]_{class}_Caudoviricetes	Viruses	1	dsDNAphage	1	1	classified	VC27575	FALSE	TRUE	virulent
ma2024imeta	contig041271	contig041271	Duplodnaviria	Heunggongvirae	Uroviricota	Caudoviricetes	[Novel_Order]_{class}_Caudoviricetes	[Novel_Family]_{class}_Caudoviricetes	[Novel_Genus]_{class}_Caudoviricetes	Viruses	1	dsDNAphage	1	1	classified	VC13135	FALSE	TRUE	temperate
ma2024imeta	contig041274	contig041274	Duplodnaviria	Heunggongvirae	Uroviricota	Caudoviricetes	[Novel_Order]_{class}_Caudoviricetes	[Novel_Family]_{class}_Caudoviricetes	[Novel_Genus]_{class}_Caudoviricetes	Viruses	1	dsDNAphage	1	1	classified	VC58364	FALSE	TRUE	temperate
ma2024imeta	contig041347	contig041347	Duplodnaviria	Heunggongvirae	Uroviricota	Caudoviricetes	[Novel_Order]_{class}_Caudoviricetes	[Novel_Family]_{class}_Caudoviricetes	[Novel_Genus]_{class}_Caudoviricetes	Viruses	0.98	dsDNAphage	1	1	classified	VC67653	FALSE	TRUE	virulent
ma2024imeta	contig041349	contig041349	Duplodnaviria	Heunggongvirae	Uroviricota	Caudoviricetes	[Novel_Order]_{class}_Caudoviricetes	[Novel_Family]_{class}_Caudoviricetes	[Novel_Genus]_{class}_Caudoviricetes	Viruses	1	dsDNAphage	1	1	classified	VC58306	FALSE	TRUE	temperate
ma2024imeta	contig041352	contig041352	Duplodnaviria	Heunggongvirae	Uroviricota	Caudoviricetes	[Novel_Order]_{class}_Caudoviricetes	[Novel_Family]_{class}_Caudoviricetes	[Novel_Genus]_{class}_Caudoviricetes	Viruses	1	dsDNAphage	1	1	classified	VC27570	FALSE	TRUE	virulent
ma2024imeta	contig041354	contig041354	Duplodnaviria	Heunggongvirae	Uroviricota	Caudoviricetes	[Novel_Order]_{class}_Caudoviricetes	[Novel_Family]_{class}_Caudoviricetes	[Novel_Genus]_{class}_Caudoviricetes	Viruses	1	dsDNAphage	1	1	classified	VC02568	FALSE	TRUE	temperate
ma2024imeta	contig041357	contig041357	Duplodnaviria	Heunggongvirae	Uroviricota	Caudoviricetes	[Novel_Order]_{class}_Caudoviricetes	[Novel_Family]_{class}_Caudoviricetes	[Novel_Genus]_{class}_Caudoviricetes	Viruses	0.987	dsDNAphage	1	1	classified	VC33469	FALSE	TRUE	temperate
ma2024imeta	contig041358	contig041358	Duplodnaviria	Heunggongvirae	Uroviricota	Caudoviricetes	[Novel_Order]_{class}_Caudoviricetes	[Novel_Family]_{class}_Caudoviricetes	[Novel_Genus]_{class}_Caudoviricetes	Viruses	1	dsDNAphage	1	3	classified	VC27557	FALSE	TRUE	virulent
ma2024imeta	contig041360	contig054016	Duplodnaviria	Heunggongvirae	Uroviricota	Caudoviricetes	[Novel_Order]_{class}_Caudoviricetes	[Novel_Family]_{class}_Caudoviricetes	[Novel_Genus]_{class}_Caudoviricetes	Viruses	0.993	dsDNAphage	1	1	classified	VC40757	FALSE	TRUE	temperate
ma2024imeta	contig041492	contig041492	Duplodnaviria	Heunggongvirae	Uroviricota	Caudoviricetes	[Novel_Order]_{class}_Caudoviricetes	[Novel_Family]_{class}_Caudoviricetes	[Novel_Genus]_{class}_Caudoviricetes	Viruses	0.993	dsDNAphage	1	3	classified	VC67722	FALSE	TRUE	virulent
ma2024imeta	contig041543	contig041543	Duplodnaviria	Heunggongvirae	Uroviricota	Caudoviricetes	[Novel_Order]_{class}_Caudoviricetes	[Novel_Family]_{class}_Caudoviricetes	[Novel_Genus]_{class}_Caudoviricetes	Viruses	1	dsDNAphage	1	1	classified	VC02487	FALSE	TRUE	temperate
ma2024imeta	contig041766	contig041766	Duplodnaviria	Heunggongvirae	Uroviricota	Caudoviricetes	[Novel_Order]_{class}_Caudoviricetes	[Novel_Family]_{class}_Caudoviricetes	[Novel_Genus]_{class}_Caudoviricetes	Viruses	1	dsDNAphage	1	3	classified	VC19972	FALSE	TRUE	virulent
ma2024imeta	contig041831	contig041831	Duplodnaviria	Heunggongvirae	Uroviricota	Caudoviricetes	[Novel_Order]_{class}_Caudoviricetes	[Novel_Family]_{class}_Caudoviricetes	[Novel_Genus]_{class}_Caudoviricetes	Viruses	0.987	dsDNAphage	1	2	classified	VC51395	FALSE	TRUE	virulent
ma2024imeta	contig041833	contig041833	Duplodnaviria	Heunggongvirae	Uroviricota	Caudoviricetes	[Novel_Order]_{class}_Caudoviricetes	[Novel_Family]_{class}_Caudoviricetes	[Novel_Genus]_{class}_Caudoviricetes	Viruses	1	dsDNAphage	1	1	classified	VC20769	FALSE	TRUE	virulent
ma2024imeta	contig041836	contig041836	Duplodnaviria	Heunggongvirae	Uroviricota	Caudoviricetes	[Novel_Order]_{class}_Caudoviricetes	[Novel_Family]_{class}_Caudoviricetes	[Novel_Genus]_{class}_Caudoviricetes	Viruses	0.987	dsDNAphage	1	1	classified	VC30885	FALSE	TRUE	temperate
ma2024imeta	contig041895	contig041895	Duplodnaviria	Heunggongvirae	Uroviricota	Caudoviricetes	[Novel_Order]_{class}_Caudoviricetes	[Novel_Family]_{class}_Caudoviricetes	[Novel_Genus]_{class}_Caudoviricetes	Viruses	1	dsDNAphage	1	1	classified	VC23738	FALSE	TRUE	virulent
ma2024imeta	contig041960	contig041960	Duplodnaviria	Heunggongvirae	Uroviricota	Caudoviricetes	[Novel_Order]_{class}_Caudoviricetes	[Novel_Family]_{class}_Caudoviricetes	[Novel_Genus]_{class}_Caudoviricetes	Viruses	1	dsDNAphage	1	1	classified	VC43723	FALSE	TRUE	temperate
ma2024imeta	contig042093	contig042093	Duplodnaviria	Heunggongvirae	Uroviricota	Caudoviricetes	[Novel_Order]_{class}_Caudoviricetes	[Novel_Family]_{class}_Caudoviricetes	[Novel_Genus]_{class}_Caudoviricetes	Viruses	1	dsDNAphage	1	1	classified	VC70970	FALSE	TRUE	virulent
ma2024imeta	contig042107	contig042107	Duplodnaviria	Heunggongvirae	Uroviricota	Caudoviricetes	[Novel_Order]_{class}_Caudoviricetes	[Novel_Family]_{class}_Caudoviricetes	[Novel_Genus]_{class}_Caudoviricetes	Viruses	0.993	dsDNAphage	1	1	classified	VC48571	FALSE	TRUE	temperate
ma2024imeta	contig042108	contig042108	Duplodnaviria	Heunggongvirae	Uroviricota	Caudoviricetes	[Novel_Order]_{class}_Caudoviricetes	[Novel_Family]_{class}_Caudoviricetes	[Novel_Genus]_{class}_Caudoviricetes	Viruses	1	dsDNAphage	1	1	classified	VC01808	FALSE	TRUE	temperate
ma2024imeta	contig042137	contig042137	Duplodnaviria	Heunggongvirae	Uroviricota	Caudoviricetes	[Novel_Order]_{class}_Caudoviricetes	[Novel_Family]_{class}_Caudoviricetes	[Novel_Genus]_{class}_Caudoviricetes	Viruses	0.993	dsDNAphage	1	1	classified	VC64734	FALSE	TRUE	temperate
ma2024imeta	contig042269	contig042269	Duplodnaviria	Heunggongvirae	Uroviricota	Caudoviricetes	[Novel_Order]_{class}_Caudoviricetes	[Novel_Family]_{class}_Caudoviricetes	[Novel_Genus]_{class}_Caudoviricetes	Viruses	1	dsDNAphage	1	1	classified	VC69130	FALSE	TRUE	virulent
ma2024imeta	contig042271	contig042271	Duplodnaviria	Heunggongvirae	Uroviricota	Caudoviricetes	[Novel_Order]_{class}_Caudoviricetes	[Novel_Family]_{class}_Caudoviricetes	[Novel_Genus]_{class}_Caudoviricetes	Viruses	0.987	dsDNAphage	1	1	classified	VC57112	FALSE	TRUE	temperate
ma2024imeta	contig042277	contig042277	Monodnaviria	Sangervirae	Phixviricota	Malgrandaviricetes	Petitvirales	Microviridae	[Novel_Genus]_{family}_Microviridae	Viruses	1	dsDNAphage	1	1	unclassified	VC77606	FALSE	FALSE	virulent
ma2024imeta	contig042301	contig042301	Duplodnaviria	Heunggongvirae	Uroviricota	Caudoviricetes	[Novel_Order]_{class}_Caudoviricetes	[Novel_Family]_{class}_Caudoviricetes	[Novel_Genus]_{class}_Caudoviricetes	Viruses	0.993	dsDNAphage	1	1	classified	VC25130	FALSE	TRUE	temperate
ma2024imeta	contig042406	contig042406	Duplodnaviria	Heunggongvirae	Uroviricota	Caudoviricetes	[Novel_Order]_{class}_Caudoviricetes	[Novel_Family]_{class}_Caudoviricetes	[Novel_Genus]_{class}_Caudoviricetes	Viruses	0.987	dsDNAphage	1	2	classified	VC27582	FALSE	TRUE	virulent
ma2024imeta	contig042423	contig042423	Duplodnaviria	Heunggongvirae	Uroviricota	Caudoviricetes	[Novel_Order]_{class}_Caudoviricetes	[Novel_Family]_{class}_Caudoviricetes	[Novel_Genus]_{class}_Caudoviricetes	Viruses	0.993	dsDNAphage	1	1	classified	VC24871	FALSE	TRUE	temperate
ma2024imeta	contig042445	contig042445	Duplodnaviria	Heunggongvirae	Uroviricota	Caudoviricetes	[Novel_Order]_{class}_Caudoviricetes	[Novel_Family]_{class}_Caudoviricetes	[Novel_Genus]_{class}_Caudoviricetes	Viruses	0.993	dsDNAphage	1	1	classified	VC62057	FALSE	TRUE	virulent
ma2024imeta	contig042451	contig042451	Duplodnaviria	Heunggongvirae	Uroviricota	Caudoviricetes	[Novel_Order]_{class}_Caudoviricetes	[Novel_Family]_{class}_Caudoviricetes	[Novel_Genus]_{class}_Caudoviricetes	Viruses	1	dsDNAphage	1	1	classified	VC43329	FALSE	TRUE	virulent
ma2024imeta	contig042454	contig042454	Duplodnaviria	Heunggongvirae	Uroviricota	Caudoviricetes	[Novel_Order]_{class}_Caudoviricetes	[Novel_Family]_{class}_Caudoviricetes	[Novel_Genus]_{class}_Caudoviricetes	Viruses	0.993	dsDNAphage	1	1	classified	VC71133	FALSE	TRUE	virulent
ma2024imeta	contig042456	contig042456	Monodnaviria	Sangervirae	Phixviricota	Malgrandaviricetes	Petitvirales	Microviridae	[Novel_Genus]_{family}_Microviridae	Viruses	0.993	dsDNAphage	1	1	unclassified	VC77607	FALSE	FALSE	virulent
ma2024imeta	contig042515	contig042515	Duplodnaviria	Heunggongvirae	Uroviricota	Caudoviricetes	Crassvirales	Steigviridae	[Novel_Genus]_{family}_Steigviridae	Viruses	1	dsDNAphage	1	1	classified	VC00157	FALSE	TRUE	virulent
ma2024imeta	contig042528	contig042528	Duplodnaviria	Heunggongvirae	Uroviricota	Caudoviricetes	[Novel_Order]_{class}_Caudoviricetes	[Novel_Family]_{class}_Caudoviricetes	[Novel_Genus]_{class}_Caudoviricetes	Viruses	0.993	dsDNAphage	1	1	classified	VC26156	FALSE	TRUE	temperate
ma2024imeta	contig042536	contig042536	Duplodnaviria	Heunggongvirae	Uroviricota	Caudoviricetes	[Novel_Order]_{class}_Caudoviricetes	[Novel_Family]_{class}_Caudoviricetes	[Novel_Genus]_{class}_Caudoviricetes	Viruses	1	dsDNAphage	1	1	classified	VC45458	FALSE	TRUE	virulent
ma2024imeta	contig042564	contig042564	Duplodnaviria	Heunggongvirae	Uroviricota	Caudoviricetes	[Novel_Order]_{class}_Caudoviricetes	[Novel_Family]_{class}_Caudoviricetes	[Novel_Genus]_{class}_Caudoviricetes	Viruses	1	dsDNAphage	1	3	classified	VC20418	FALSE	TRUE	virulent
ma2024imeta	contig042632	contig042632	Duplodnaviria	Heunggongvirae	Uroviricota	Caudoviricetes	[Novel_Order]_{class}_Caudoviricetes	[Novel_Family]_{class}_Caudoviricetes	[Novel_Genus]_{class}_Caudoviricetes	Viruses	1	dsDNAphage	1	4	classified	VC63163	FALSE	TRUE	temperate
ma2024imeta	contig042658	contig042658	Duplodnaviria	Heunggongvirae	Uroviricota	Caudoviricetes	[Novel_Order]_{class}_Caudoviricetes	[Novel_Family]_{class}_Caudoviricetes	[Novel_Genus]_{class}_Caudoviricetes	Viruses	0.987	dsDNAphage	1	1	classified	VC34057	FALSE	TRUE	virulent
ma2024imeta	contig042828	contig042828	Duplodnaviria	Heunggongvirae	Uroviricota	Caudoviricetes	[Novel_Order]_{class}_Caudoviricetes	[Novel_Family]_{class}_Caudoviricetes	[Novel_Genus]_{class}_Caudoviricetes	Viruses	1	dsDNAphage	1	1	classified	VC20245	FALSE	TRUE	virulent
ma2024imeta	contig042833	contig042833	Duplodnaviria	Heunggongvirae	Uroviricota	Caudoviricetes	[Novel_Order]_{class}_Caudoviricetes	[Novel_Family]_{class}_Caudoviricetes	[Novel_Genus]_{class}_Caudoviricetes	Viruses	0.993	dsDNAphage	1	1	classified	VC26895	FALSE	TRUE	virulent
ma2024imeta	contig042875	contig251940	Duplodnaviria	Heunggongvirae	Uroviricota	Caudoviricetes	[Novel_Order]_{class}_Caudoviricetes	[Novel_Family]_{class}_Caudoviricetes	[Novel_Genus]_{class}_Caudoviricetes	Viruses	0.993	dsDNAphage	1	4	classified	VC57589	FALSE	TRUE	virulent
ma2024imeta	contig042916	contig042916	Duplodnaviria	Heunggongvirae	Uroviricota	Caudoviricetes	[Novel_Order]_{class}_Caudoviricetes	[Novel_Family]_{class}_Caudoviricetes	[Novel_Genus]_{class}_Caudoviricetes	Viruses	0.993	dsDNAphage	1	1	classified	VC27643	FALSE	TRUE	virulent
ma2024imeta	contig042918	contig269348	Duplodnaviria	Heunggongvirae	Uroviricota	Caudoviricetes	[Novel_Order]_{class}_Caudoviricetes	[Novel_Family]_{class}_Caudoviricetes	[Novel_Genus]_{class}_Caudoviricetes	Viruses	0.993	dsDNAphage	1	1	classified	VC29837	FALSE	TRUE	temperate
ma2024imeta	contig042945	contig042945	Duplodnaviria	Heunggongvirae	Uroviricota	Caudoviricetes	[Novel_Order]_{class}_Caudoviricetes	[Novel_Family]_{class}_Caudoviricetes	[Novel_Genus]_{class}_Caudoviricetes	Viruses	1	dsDNAphage	1	1	classified	VC46888	FALSE	TRUE	virulent
ma2024imeta	contig043054	contig043054	Duplodnaviria	Heunggongvirae	Uroviricota	Caudoviricetes	[Novel_Order]_{class}_Caudoviricetes	[Novel_Family]_{class}_Caudoviricetes	[Novel_Genus]_{class}_Caudoviricetes	Viruses	1	dsDNAphage	1	2	classified	VC41150	FALSE	TRUE	virulent
ma2024imeta	contig043113	contig043113	Duplodnaviria	Heunggongvirae	Uroviricota	Caudoviricetes	[Novel_Order]_{class}_Caudoviricetes	[Novel_Family]_{class}_Caudoviricetes	[Novel_Genus]_{class}_Caudoviricetes	Viruses	0.993	dsDNAphage	1	1	classified	VC25870	FALSE	TRUE	temperate
ma2024imeta	contig043120	contig043120	Duplodnaviria	Heunggongvirae	Uroviricota	Caudoviricetes	[Novel_Order]_{class}_Caudoviricetes	[Novel_Family]_{class}_Caudoviricetes	[Novel_Genus]_{class}_Caudoviricetes	Viruses	0.98	dsDNAphage	1	1	classified	VC48581	FALSE	TRUE	temperate
ma2024imeta	contig043124	contig043124	Duplodnaviria	Heunggongvirae	Uroviricota	Caudoviricetes	[Novel_Order]_{class}_Caudoviricetes	[Novel_Family]_{class}_Caudoviricetes	[Novel_Genus]_{class}_Caudoviricetes	Viruses	1	dsDNAphage	1	1	classified	VC37918	FALSE	TRUE	temperate
ma2024imeta	contig043132	contig043132	Duplodnaviria	Heunggongvirae	Uroviricota	Caudoviricetes	[Novel_Order]_{class}_Caudoviricetes	[Novel_Family]_{class}_Caudoviricetes	[Novel_Genus]_{class}_Caudoviricetes	Viruses	0.993	dsDNAphage	1	1	classified	VC27637	FALSE	TRUE	virulent
ma2024imeta	contig043163	contig043163	Duplodnaviria	Heunggongvirae	Uroviricota	Caudoviricetes	[Novel_Order]_{class}_Caudoviricetes	[Novel_Family]_{class}_Caudoviricetes	[Novel_Genus]_{class}_Caudoviricetes	Viruses	1	dsDNAphage	1	3	classified	VC63152	FALSE	TRUE	temperate
ma2024imeta	contig043183	contig043183	Duplodnaviria	Heunggongvirae	Uroviricota	Caudoviricetes	[Novel_Order]_{class}_Caudoviricetes	[Novel_Family]_{class}_Caudoviricetes	[Novel_Genus]_{class}_Caudoviricetes	Viruses	1	dsDNAphage	1	1	classified	VC34287	FALSE	TRUE	temperate
ma2024imeta	contig043230	contig043230	Duplodnaviria	Heunggongvirae	Uroviricota	Caudoviricetes	[Novel_Order]_{class}_Caudoviricetes	[Novel_Family]_{class}_Caudoviricetes	[Novel_Genus]_{class}_Caudoviricetes	Viruses	1	dsDNAphage	1	1	classified	VC55268	FALSE	TRUE	virulent
ma2024imeta	contig043260	contig043260	Duplodnaviria	Heunggongvirae	Uroviricota	Caudoviricetes	[Novel_Order]_{class}_Caudoviricetes	[Novel_Family]_{class}_Caudoviricetes	[Novel_Genus]_{class}_Caudoviricetes	Viruses	0.987	dsDNAphage	1	1	classified	VC26846	FALSE	TRUE	virulent
ma2024imeta	contig043261	contig043261	Duplodnaviria	Heunggongvirae	Uroviricota	Caudoviricetes	[Novel_Order]_{class}_Caudoviricetes	[Novel_Family]_{class}_Caudoviricetes	[Novel_Genus]_{class}_Caudoviricetes	Viruses	0.987	dsDNAphage	1	2	classified	VC46857	FALSE	TRUE	virulent
ma2024imeta	contig043289	contig043289	Duplodnaviria	Heunggongvirae	Uroviricota	Caudoviricetes	[Novel_Order]_{class}_Caudoviricetes	[Novel_Family]_{class}_Caudoviricetes	[Novel_Genus]_{class}_Caudoviricetes	Viruses	0.987	dsDNAphage	1	1	classified	VC30980	FALSE	TRUE	virulent
ma2024imeta	contig043310	contig043310	Duplodnaviria	Heunggongvirae	Uroviricota	Caudoviricetes	[Novel_Order]_{class}_Caudoviricetes	[Novel_Family]_{class}_Caudoviricetes	[Novel_Genus]_{class}_Caudoviricetes	Viruses	0.987	dsDNAphage	1	1	classified	VC34223	FALSE	TRUE	temperate
ma2024imeta	contig043311	contig235119	Duplodnaviria	Heunggongvirae	Uroviricota	Caudoviricetes	[Novel_Order]_{class}_Caudoviricetes	[Novel_Family]_{class}_Caudoviricetes	[Novel_Genus]_{class}_Caudoviricetes	Viruses	1	dsDNAphage	1	3	classified	VC15366	FALSE	TRUE	virulent
ma2024imeta	contig043330	contig043330	Duplodnaviria	Heunggongvirae	Uroviricota	Caudoviricetes	[Novel_Order]_{class}_Caudoviricetes	[Novel_Family]_{class}_Caudoviricetes	[Novel_Genus]_{class}_Caudoviricetes	Viruses	0.987	dsDNAphage	1	4	classified	VC62998	FALSE	TRUE	temperate
ma2024imeta	contig043445	contig043445	Duplodnaviria	Heunggongvirae	Uroviricota	Caudoviricetes	[Novel_Order]_{class}_Caudoviricetes	[Novel_Family]_{class}_Caudoviricetes	[Novel_Genus]_{class}_Caudoviricetes	Viruses	0.987	dsDNAphage	1	1	classified	VC37844	FALSE	TRUE	temperate
ma2024imeta	contig043463	contig043463	Duplodnaviria	Heunggongvirae	Uroviricota	Caudoviricetes	[Novel_Order]_{class}_Caudoviricetes	[Novel_Family]_{class}_Caudoviricetes	[Novel_Genus]_{class}_Caudoviricetes	Viruses	1	dsDNAphage	1	1	classified	VC01809	FALSE	TRUE	temperate
ma2024imeta	contig043506	contig043506	Duplodnaviria	Heunggongvirae	Uroviricota	Caudoviricetes	[Novel_Order]_{class}_Caudoviricetes	[Novel_Family]_{class}_Caudoviricetes	[Novel_Genus]_{class}_Caudoviricetes	Viruses	0.987	dsDNAphage	1	1	classified	VC48790	FALSE	TRUE	temperate
ma2024imeta	contig043507	contig078434	Monodnaviria	Sangervirae	Phixviricota	Malgrandaviricetes	Petitvirales	Microviridae	[Novel_Genus]_{family}_Microviridae	Viruses	0.993	dsDNAphage	1	1	unclassified	VC77636	FALSE	FALSE	virulent
ma2024imeta	contig043622	contig043622	Duplodnaviria	Heunggongvirae	Uroviricota	Caudoviricetes	[Novel_Order]_{class}_Caudoviricetes	[Novel_Family]_{class}_Caudoviricetes	[Novel_Genus]_{class}_Caudoviricetes	Viruses	1	dsDNAphage	1	2	classified	VC45665	FALSE	TRUE	temperate
ma2024imeta	contig043654	contig043654	Duplodnaviria	Heunggongvirae	Uroviricota	Caudoviricetes	[Novel_Order]_{class}_Caudoviricetes	[Novel_Family]_{class}_Caudoviricetes	[Novel_Genus]_{class}_Caudoviricetes	Viruses	1	dsDNAphage	1	4	classified	VC56703	FALSE	TRUE	temperate
ma2024imeta	contig043749	contig043749	Duplodnaviria	Heunggongvirae	Uroviricota	Caudoviricetes	[Novel_Order]_{class}_Caudoviricetes	[Novel_Family]_{class}_Caudoviricetes	[Novel_Genus]_{class}_Caudoviricetes	Viruses	1	dsDNAphage	1	1	classified	VC69182	FALSE	TRUE	virulent
ma2024imeta	contig043753	contig043753	Duplodnaviria	Heunggongvirae	Uroviricota	Caudoviricetes	[Novel_Order]_{class}_Caudoviricetes	[Novel_Family]_{class}_Caudoviricetes	[Novel_Genus]_{class}_Caudoviricetes	Viruses	1	dsDNAphage	1	1	classified	VC49132	FALSE	TRUE	virulent
ma2024imeta	contig043757	contig043757	Duplodnaviria	Heunggongvirae	Uroviricota	Caudoviricetes	Crassvirales	Suoliviridae	[Novel_Genus]_{family}_Suoliviridae	Viruses	0.993	dsDNAphage	1	1	classified	VC00291	FALSE	TRUE	virulent
ma2024imeta	contig043846	contig043846	Duplodnaviria	Heunggongvirae	Uroviricota	Caudoviricetes	[Novel_Order]_{class}_Caudoviricetes	[Novel_Family]_{class}_Caudoviricetes	[Novel_Genus]_{class}_Caudoviricetes	Viruses	0.967	dsDNAphage	1	1	classified	VC27019	FALSE	TRUE	virulent
ma2024imeta	contig043937	contig043524	Duplodnaviria	Heunggongvirae	Uroviricota	Caudoviricetes	[Novel_Order]_{class}_Caudoviricetes	[Novel_Family]_{class}_Caudoviricetes	[Novel_Genus]_{class}_Caudoviricetes	Viruses	0.993	dsDNAphage	1	2	classified	VC64254	FALSE	TRUE	temperate
ma2024imeta	contig044148	contig044148	Duplodnaviria	Heunggongvirae	Uroviricota	Caudoviricetes	[Novel_Order]_{class}_Caudoviricetes	[Novel_Family]_{class}_Caudoviricetes	[Novel_Genus]_{class}_Caudoviricetes	Viruses	0.987	dsDNAphage	1	2	classified	VC41862	FALSE	TRUE	temperate
ma2024imeta	contig044152	contig062178	Duplodnaviria	Heunggongvirae	Uroviricota	Caudoviricetes	[Novel_Order]_{class}_Caudoviricetes	[Novel_Family]_{class}_Caudoviricetes	[Novel_Genus]_{class}_Caudoviricetes	Viruses	1	dsDNAphage	1	1	classified	VC34225	FALSE	TRUE	temperate
ma2024imeta	contig044164	contig018502	Duplodnaviria	Heunggongvirae	Uroviricota	Caudoviricetes	[Novel_Order]_{class}_Caudoviricetes	[Novel_Family]_{class}_Caudoviricetes	[Novel_Genus]_{class}_Caudoviricetes	Viruses	1	dsDNAphage	1	3	classified	VC63145	FALSE	TRUE	temperate
ma2024imeta	contig044379	contig044379	Duplodnaviria	Heunggongvirae	Uroviricota	Caudoviricetes	[Novel_Order]_{class}_Caudoviricetes	[Novel_Family]_{class}_Caudoviricetes	[Novel_Genus]_{class}_Caudoviricetes	Viruses	1	dsDNAphage	1	1	classified	VC54897	FALSE	TRUE	temperate
ma2024imeta	contig044434	contig043680	Duplodnaviria	Heunggongvirae	Uroviricota	Caudoviricetes	[Novel_Order]_{class}_Caudoviricetes	[Novel_Family]_{class}_Caudoviricetes	[Novel_Genus]_{class}_Caudoviricetes	Viruses	1	dsDNAphage	1	2	classified	VC04879	FALSE	TRUE	temperate
ma2024imeta	contig044475	contig008075	Duplodnaviria	Heunggongvirae	Uroviricota	Caudoviricetes	[Novel_Order]_{class}_Caudoviricetes	[Novel_Family]_{class}_Caudoviricetes	[Novel_Genus]_{class}_Caudoviricetes	Viruses	0.993	dsDNAphage	1	2	classified	VC42065	FALSE	TRUE	temperate
ma2024imeta	contig044710	contig044710	Duplodnaviria	Heunggongvirae	Uroviricota	Caudoviricetes	[Novel_Order]_{class}_Caudoviricetes	[Novel_Family]_{class}_Caudoviricetes	[Novel_Genus]_{class}_Caudoviricetes	Viruses	1	dsDNAphage	1	2	classified	VC61393	FALSE	TRUE	temperate
ma2024imeta	contig044921	contig044921	Duplodnaviria	Heunggongvirae	Uroviricota	Caudoviricetes	[Novel_Order]_{class}_Caudoviricetes	[Novel_Family]_{class}_Caudoviricetes	[Novel_Genus]_{class}_Caudoviricetes	Viruses	0.973	dsDNAphage	1	1	classified	VC08407	FALSE	TRUE	virulent
ma2024imeta	contig044922	contig044922	Duplodnaviria	Heunggongvirae	Uroviricota	Caudoviricetes	[Novel_Order]_{class}_Caudoviricetes	[Novel_Family]_{class}_Caudoviricetes	[Novel_Genus]_{class}_Caudoviricetes	Viruses	1	dsDNAphage	1	1	classified	VC30430	FALSE	TRUE	virulent
ma2024imeta	contig044975	contig044975	Duplodnaviria	Heunggongvirae	Uroviricota	Caudoviricetes	[Novel_Order]_{class}_Caudoviricetes	[Novel_Family]_{class}_Caudoviricetes	[Novel_Genus]_{class}_Caudoviricetes	Viruses	0.993	dsDNAphage	1	3	classified	VC64776	FALSE	TRUE	temperate
ma2024imeta	contig044986	contig044986	Duplodnaviria	Heunggongvirae	Uroviricota	Caudoviricetes	[Novel_Order]_{class}_Caudoviricetes	[Novel_Family]_{class}_Caudoviricetes	[Novel_Genus]_{class}_Caudoviricetes	Viruses	0.993	dsDNAphage	1	1	classified	VC70695	FALSE	TRUE	temperate
ma2024imeta	contig044987	contig044987	Duplodnaviria	Heunggongvirae	Uroviricota	Caudoviricetes	[Novel_Order]_{class}_Caudoviricetes	[Novel_Family]_{class}_Caudoviricetes	[Novel_Genus]_{class}_Caudoviricetes	Viruses	1	dsDNAphage	1	1	classified	VC46006	FALSE	TRUE	virulent
ma2024imeta	contig045040	contig045040	Duplodnaviria	Heunggongvirae	Uroviricota	Caudoviricetes	[Novel_Order]_{class}_Caudoviricetes	[Novel_Family]_{class}_Caudoviricetes	[Novel_Genus]_{class}_Caudoviricetes	Viruses	0.973	dsDNAphage	1	1	classified	VC57215	FALSE	TRUE	temperate
ma2024imeta	contig045071	contig045071	Duplodnaviria	Heunggongvirae	Uroviricota	Caudoviricetes	[Novel_Order]_{class}_Caudoviricetes	[Novel_Family]_{class}_Caudoviricetes	[Novel_Genus]_{class}_Caudoviricetes	Viruses	0.993	dsDNAphage	1	3	classified	VC63557	FALSE	TRUE	temperate
ma2024imeta	contig045127	contig045127	Duplodnaviria	Heunggongvirae	Uroviricota	Caudoviricetes	Crassvirales	[Novel_Family]_{order}_Crassvirales	[Novel_Genus]_{order}_Crassvirales	Viruses	1	dsDNAphage	1	3	classified	VC00370	FALSE	TRUE	virulent
ma2024imeta	contig045143	contig045143	Duplodnaviria	Heunggongvirae	Uroviricota	Caudoviricetes	[Novel_Order]_{class}_Caudoviricetes	[Novel_Family]_{class}_Caudoviricetes	[Novel_Genus]_{class}_Caudoviricetes	Viruses	0.993	dsDNAphage	1	1	classified	VC28097	FALSE	TRUE	virulent
ma2024imeta	contig045173	contig045173	Duplodnaviria	Heunggongvirae	Uroviricota	Caudoviricetes	[Novel_Order]_{class}_Caudoviricetes	[Novel_Family]_{class}_Caudoviricetes	[Novel_Genus]_{class}_Caudoviricetes	Viruses	0.987	dsDNAphage	1	1	classified	VC36610	FALSE	TRUE	temperate
ma2024imeta	contig045205	contig045205	Duplodnaviria	Heunggongvirae	Uroviricota	Caudoviricetes	[Novel_Order]_{class}_Caudoviricetes	[Novel_Family]_{class}_Caudoviricetes	[Novel_Genus]_{class}_Caudoviricetes	Viruses	1	dsDNAphage	1	1	classified	VC44271	FALSE	TRUE	temperate
ma2024imeta	contig045222	contig045222	Duplodnaviria	Heunggongvirae	Uroviricota	Caudoviricetes	[Novel_Order]_{class}_Caudoviricetes	[Novel_Family]_{class}_Caudoviricetes	[Novel_Genus]_{class}_Caudoviricetes	Viruses	0.987	dsDNAphage	1	1	classified	VC63779	FALSE	TRUE	temperate
ma2024imeta	contig045317	contig047243	Monodnaviria	Sangervirae	Phixviricota	Malgrandaviricetes	Petitvirales	Microviridae	[Novel_Genus]_{family}_Microviridae	Viruses	1	dsDNAphage	1	4	classified	VC18348	FALSE	TRUE	virulent
ma2024imeta	contig045329	contig045329	Duplodnaviria	Heunggongvirae	Uroviricota	Caudoviricetes	[Novel_Order]_{class}_Caudoviricetes	[Novel_Family]_{class}_Caudoviricetes	[Novel_Genus]_{class}_Caudoviricetes	Viruses	1	dsDNAphage	1	3	classified	VC43787	FALSE	TRUE	temperate
ma2024imeta	contig045361	contig045361	Duplodnaviria	Heunggongvirae	Uroviricota	Caudoviricetes	[Novel_Order]_{class}_Caudoviricetes	[Novel_Family]_{class}_Caudoviricetes	[Novel_Genus]_{class}_Caudoviricetes	Viruses	0.993	dsDNAphage	1	4	classified	VC31601	FALSE	TRUE	temperate
ma2024imeta	contig045429	contig045429	Duplodnaviria	Heunggongvirae	Uroviricota	Caudoviricetes	[Novel_Order]_{class}_Caudoviricetes	[Novel_Family]_{class}_Caudoviricetes	[Novel_Genus]_{class}_Caudoviricetes	Viruses	0.993	dsDNAphage	1	1	classified	VC36574	FALSE	TRUE	temperate
ma2024imeta	contig045453	contig045453	Duplodnaviria	Heunggongvirae	Uroviricota	Caudoviricetes	[Novel_Order]_{class}_Caudoviricetes	[Novel_Family]_{class}_Caudoviricetes	[Novel_Genus]_{class}_Caudoviricetes	Viruses	1	dsDNAphage	1	1	classified	VC35111	FALSE	TRUE	virulent
ma2024imeta	contig045456	contig045456	Duplodnaviria	Heunggongvirae	Uroviricota	Caudoviricetes	[Novel_Order]_{class}_Caudoviricetes	[Novel_Family]_{class}_Caudoviricetes	[Novel_Genus]_{class}_Caudoviricetes	Viruses	1	dsDNAphage	1	1	classified	VC46006	FALSE	TRUE	virulent
ma2024imeta	contig045460	contig045460	Duplodnaviria	Heunggongvirae	Uroviricota	Caudoviricetes	[Novel_Order]_{class}_Caudoviricetes	[Novel_Family]_{class}_Caudoviricetes	[Novel_Genus]_{class}_Caudoviricetes	Viruses	0.993	dsDNAphage	1	1	classified	VC65381	FALSE	TRUE	virulent
ma2024imeta	contig045467	contig045467	Duplodnaviria	Heunggongvirae	Uroviricota	Caudoviricetes	[Novel_Order]_{class}_Caudoviricetes	[Novel_Family]_{class}_Caudoviricetes	[Novel_Genus]_{class}_Caudoviricetes	Viruses	0.92	dsDNAphage	1	1	classified	VC07578	FALSE	TRUE	virulent
ma2024imeta	contig045472	contig045472	Duplodnaviria	Heunggongvirae	Uroviricota	Caudoviricetes	Crassvirales	[Novel_Family]_{order}_Crassvirales	[Novel_Genus]_{order}_Crassvirales	Viruses	0.993	dsDNAphage	1	1	classified	VC00145	FALSE	TRUE	virulent
ma2024imeta	contig045474	contig045474	Duplodnaviria	Heunggongvirae	Uroviricota	Caudoviricetes	Crassvirales	[Novel_Family]_{order}_Crassvirales	[Novel_Genus]_{order}_Crassvirales	Viruses	1	dsDNAphage	1	1	classified	VC00127	FALSE	TRUE	virulent
ma2024imeta	contig045561	contig045561	Duplodnaviria	Heunggongvirae	Uroviricota	Caudoviricetes	[Novel_Order]_{class}_Caudoviricetes	[Novel_Family]_{class}_Caudoviricetes	[Novel_Genus]_{class}_Caudoviricetes	Viruses	0.987	dsDNAphage	1	1	classified	VC64945	FALSE	TRUE	virulent
ma2024imeta	contig045563	contig045563	Duplodnaviria	Heunggongvirae	Uroviricota	Caudoviricetes	[Novel_Order]_{class}_Caudoviricetes	[Novel_Family]_{class}_Caudoviricetes	[Novel_Genus]_{class}_Caudoviricetes	Viruses	1	dsDNAphage	1	1	classified	VC59077	FALSE	TRUE	virulent
ma2024imeta	contig045646	contig045646	Duplodnaviria	Heunggongvirae	Uroviricota	Caudoviricetes	[Novel_Order]_{class}_Caudoviricetes	[Novel_Family]_{class}_Caudoviricetes	[Novel_Genus]_{class}_Caudoviricetes	Viruses	0.993	dsDNAphage	1	1	classified	VC24871	FALSE	TRUE	temperate
ma2024imeta	contig045666	contig045666	Duplodnaviria	Heunggongvirae	Uroviricota	Caudoviricetes	[Novel_Order]_{class}_Caudoviricetes	[Novel_Family]_{class}_Caudoviricetes	[Novel_Genus]_{class}_Caudoviricetes	Viruses	0.993	dsDNAphage	1	4	classified	VC69167	FALSE	TRUE	temperate
ma2024imeta	contig045674	contig045674	Duplodnaviria	Heunggongvirae	Uroviricota	Caudoviricetes	[Novel_Order]_{class}_Caudoviricetes	[Novel_Family]_{class}_Caudoviricetes	[Novel_Genus]_{class}_Caudoviricetes	Viruses	1	dsDNAphage	1	1	classified	VC20707	FALSE	TRUE	virulent
ma2024imeta	contig045739	contig045739	Duplodnaviria	Heunggongvirae	Uroviricota	Caudoviricetes	[Novel_Order]_{class}_Caudoviricetes	[Novel_Family]_{class}_Caudoviricetes	[Novel_Genus]_{class}_Caudoviricetes	Viruses	0.993	dsDNAphage	1	1	classified	VC43328	FALSE	TRUE	virulent
ma2024imeta	contig045748	contig045748	Duplodnaviria	Heunggongvirae	Uroviricota	Caudoviricetes	[Novel_Order]_{class}_Caudoviricetes	[Novel_Family]_{class}_Caudoviricetes	[Novel_Genus]_{class}_Caudoviricetes	Viruses	1	dsDNAphage	1	1	classified	VC20715	FALSE	TRUE	virulent
ma2024imeta	contig045776	contig045776	Duplodnaviria	Heunggongvirae	Uroviricota	Caudoviricetes	[Novel_Order]_{class}_Caudoviricetes	[Novel_Family]_{class}_Caudoviricetes	[Novel_Genus]_{class}_Caudoviricetes	Viruses	1	dsDNAphage	1	1	classified	VC44266	FALSE	TRUE	temperate
ma2024imeta	contig045779	contig045779	Duplodnaviria	Heunggongvirae	Uroviricota	Caudoviricetes	[Novel_Order]_{class}_Caudoviricetes	[Novel_Family]_{class}_Caudoviricetes	[Novel_Genus]_{class}_Caudoviricetes	Viruses	1	dsDNAphage	1	1	classified	VC41090	FALSE	TRUE	temperate
ma2024imeta	contig045785	contig045785	Duplodnaviria	Heunggongvirae	Uroviricota	Caudoviricetes	[Novel_Order]_{class}_Caudoviricetes	[Novel_Family]_{class}_Caudoviricetes	[Novel_Genus]_{class}_Caudoviricetes	Viruses	1	dsDNAphage	1	1	classified	VC45604	FALSE	TRUE	temperate
ma2024imeta	contig045806	contig045806	Duplodnaviria	Heunggongvirae	Uroviricota	Caudoviricetes	[Novel_Order]_{class}_Caudoviricetes	[Novel_Family]_{class}_Caudoviricetes	[Novel_Genus]_{class}_Caudoviricetes	Viruses	1	dsDNAphage	1	3	classified	VC35072	FALSE	TRUE	virulent
ma2024imeta	contig045880	contig045880	Duplodnaviria	Heunggongvirae	Uroviricota	Caudoviricetes	[Novel_Order]_{class}_Caudoviricetes	[Novel_Family]_{class}_Caudoviricetes	[Novel_Genus]_{class}_Caudoviricetes	Viruses	1	dsDNAphage	1	3	classified	VC02577	FALSE	TRUE	temperate
ma2024imeta	contig045886	contig045886	Duplodnaviria	Heunggongvirae	Uroviricota	Caudoviricetes	[Novel_Order]_{class}_Caudoviricetes	[Novel_Family]_{class}_Caudoviricetes	[Novel_Genus]_{class}_Caudoviricetes	Viruses	1	dsDNAphage	1	1	classified	VC64945	FALSE	TRUE	virulent
ma2024imeta	contig045912	contig045912	Duplodnaviria	Heunggongvirae	Uroviricota	Caudoviricetes	[Novel_Order]_{class}_Caudoviricetes	[Novel_Family]_{class}_Caudoviricetes	[Novel_Genus]_{class}_Caudoviricetes	Viruses	1	dsDNAphage	1	2	classified	VC26325	FALSE	TRUE	temperate
ma2024imeta	contig045931	contig045931	Duplodnaviria	Heunggongvirae	Uroviricota	Caudoviricetes	[Novel_Order]_{class}_Caudoviricetes	[Novel_Family]_{class}_Caudoviricetes	[Novel_Genus]_{class}_Caudoviricetes	Viruses	1	dsDNAphage	1	3	classified	VC35070	FALSE	TRUE	temperate
ma2024imeta	contig045932	contig045932	Duplodnaviria	Heunggongvirae	Uroviricota	Caudoviricetes	[Novel_Order]_{class}_Caudoviricetes	[Novel_Family]_{class}_Caudoviricetes	[Novel_Genus]_{class}_Caudoviricetes	Viruses	0.993	dsDNAphage	1	3	classified	VC23966	FALSE	TRUE	temperate
ma2024imeta	contig045968	contig045968	Duplodnaviria	Heunggongvirae	Uroviricota	Caudoviricetes	[Novel_Order]_{class}_Caudoviricetes	[Novel_Family]_{class}_Caudoviricetes	[Novel_Genus]_{class}_Caudoviricetes	Viruses	1	dsDNAphage	1	1	classified	VC16557	FALSE	TRUE	virulent
ma2024imeta	contig046017	contig046017	Duplodnaviria	Heunggongvirae	Uroviricota	Caudoviricetes	Crassvirales	[Novel_Family]_{order}_Crassvirales	[Novel_Genus]_{order}_Crassvirales	Viruses	1	dsDNAphage	1	3	classified	VC00182	FALSE	TRUE	virulent
ma2024imeta	contig046049	contig046049	Duplodnaviria	Heunggongvirae	Uroviricota	Caudoviricetes	[Novel_Order]_{class}_Caudoviricetes	[Novel_Family]_{class}_Caudoviricetes	[Novel_Genus]_{class}_Caudoviricetes	Viruses	1	dsDNAphage	1	1	classified	VC56730	FALSE	TRUE	virulent
ma2024imeta	contig046106	contig046106	Duplodnaviria	Heunggongvirae	Uroviricota	Caudoviricetes	[Novel_Order]_{class}_Caudoviricetes	[Novel_Family]_{class}_Caudoviricetes	[Novel_Genus]_{class}_Caudoviricetes	Viruses	0.993	dsDNAphage	1	1	classified	VC41074	FALSE	TRUE	temperate
ma2024imeta	contig046116	contig046116	Duplodnaviria	Heunggongvirae	Uroviricota	Caudoviricetes	[Novel_Order]_{class}_Caudoviricetes	[Novel_Family]_{class}_Caudoviricetes	[Novel_Genus]_{class}_Caudoviricetes	Viruses	1	dsDNAphage	1	1	classified	VC25923	FALSE	TRUE	virulent
ma2024imeta	contig046118	contig046118	Duplodnaviria	Heunggongvirae	Uroviricota	Caudoviricetes	[Novel_Order]_{class}_Caudoviricetes	[Novel_Family]_{class}_Caudoviricetes	[Novel_Genus]_{class}_Caudoviricetes	Viruses	0.993	dsDNAphage	1	1	classified	VC70695	FALSE	TRUE	temperate
ma2024imeta	contig046121	contig046121	Duplodnaviria	Heunggongvirae	Uroviricota	Caudoviricetes	[Novel_Order]_{class}_Caudoviricetes	[Novel_Family]_{class}_Caudoviricetes	[Novel_Genus]_{class}_Caudoviricetes	Viruses	1	dsDNAphage	1	1	classified	VC70811	FALSE	TRUE	virulent
ma2024imeta	contig046123	contig046123	Monodnaviria	Sangervirae	Phixviricota	Malgrandaviricetes	Petitvirales	Microviridae	[Novel_Genus]_{family}_Microviridae	Viruses	1	dsDNAphage	1	1	unclassified	VC78513	FALSE	FALSE	virulent
ma2024imeta	contig046328	contig046328	Duplodnaviria	Heunggongvirae	Uroviricota	Caudoviricetes	[Novel_Order]_{class}_Caudoviricetes	[Novel_Family]_{class}_Caudoviricetes	[Novel_Genus]_{class}_Caudoviricetes	Viruses	0.98	dsDNAphage	1	1	classified	VC12270	FALSE	TRUE	temperate
ma2024imeta	contig046393	contig046393	Duplodnaviria	Heunggongvirae	Uroviricota	Caudoviricetes	[Novel_Order]_{class}_Caudoviricetes	[Novel_Family]_{class}_Caudoviricetes	[Novel_Genus]_{class}_Caudoviricetes	Viruses	1	dsDNAphage	1	3	classified	VC08501	FALSE	TRUE	virulent
ma2024imeta	contig046413	contig046413	Duplodnaviria	Heunggongvirae	Uroviricota	Caudoviricetes	[Novel_Order]_{class}_Caudoviricetes	[Novel_Family]_{class}_Caudoviricetes	[Novel_Genus]_{class}_Caudoviricetes	Viruses	0.993	dsDNAphage	1	1	classified	VC30059	FALSE	TRUE	virulent
ma2024imeta	contig046415	contig046415	Duplodnaviria	Heunggongvirae	Uroviricota	Caudoviricetes	[Novel_Order]_{class}_Caudoviricetes	[Novel_Family]_{class}_Caudoviricetes	[Novel_Genus]_{class}_Caudoviricetes	Viruses	0.993	dsDNAphage	1	1	classified	VC38997	FALSE	TRUE	temperate
ma2024imeta	contig046459	contig046459	Duplodnaviria	Heunggongvirae	Uroviricota	Caudoviricetes	[Novel_Order]_{class}_Caudoviricetes	[Novel_Family]_{class}_Caudoviricetes	[Novel_Genus]_{class}_Caudoviricetes	Viruses	0.987	dsDNAphage	1	1	classified	VC25144	FALSE	TRUE	temperate
ma2024imeta	contig046470	contig046470	Duplodnaviria	Heunggongvirae	Uroviricota	Caudoviricetes	[Novel_Order]_{class}_Caudoviricetes	[Novel_Family]_{class}_Caudoviricetes	[Novel_Genus]_{class}_Caudoviricetes	Viruses	0.993	dsDNAphage	1	3	classified	VC02120	FALSE	TRUE	virulent
ma2024imeta	contig046474	contig046474	Duplodnaviria	Heunggongvirae	Uroviricota	Caudoviricetes	[Novel_Order]_{class}_Caudoviricetes	[Novel_Family]_{class}_Caudoviricetes	[Novel_Genus]_{class}_Caudoviricetes	Viruses	1	dsDNAphage	1	1	classified	VC64939	FALSE	TRUE	virulent
ma2024imeta	contig046703	contig046703	Duplodnaviria	Heunggongvirae	Uroviricota	Caudoviricetes	[Novel_Order]_{class}_Caudoviricetes	[Novel_Family]_{class}_Caudoviricetes	[Novel_Genus]_{class}_Caudoviricetes	Viruses	1	dsDNAphage	1	1	classified	VC14608	FALSE	TRUE	virulent
ma2024imeta	contig046704	contig046704	Duplodnaviria	Heunggongvirae	Uroviricota	Caudoviricetes	[Novel_Order]_{class}_Caudoviricetes	[Novel_Family]_{class}_Caudoviricetes	[Novel_Genus]_{class}_Caudoviricetes	Viruses	1	dsDNAphage	1	1	classified	VC04800	FALSE	TRUE	virulent
ma2024imeta	contig046715	contig046715	Duplodnaviria	Heunggongvirae	Uroviricota	Caudoviricetes	[Novel_Order]_{class}_Caudoviricetes	[Novel_Family]_{class}_Caudoviricetes	[Novel_Genus]_{class}_Caudoviricetes	Viruses	1	dsDNAphage	1	1	classified	VC25341	FALSE	TRUE	temperate
ma2024imeta	contig046833	contig046833	Duplodnaviria	Heunggongvirae	Uroviricota	Caudoviricetes	[Novel_Order]_{class}_Caudoviricetes	[Novel_Family]_{class}_Caudoviricetes	[Novel_Genus]_{class}_Caudoviricetes	Viruses	0.987	dsDNAphage	1	4	classified	VC61275	FALSE	TRUE	temperate
ma2024imeta	contig046855	contig046855	Duplodnaviria	Heunggongvirae	Uroviricota	Caudoviricetes	[Novel_Order]_{class}_Caudoviricetes	[Novel_Family]_{class}_Caudoviricetes	[Novel_Genus]_{class}_Caudoviricetes	Viruses	1	dsDNAphage	1	1	classified	VC65363	FALSE	TRUE	virulent
ma2024imeta	contig046866	contig045273	Duplodnaviria	Heunggongvirae	Uroviricota	Caudoviricetes	[Novel_Order]_{class}_Caudoviricetes	[Novel_Family]_{class}_Caudoviricetes	[Novel_Genus]_{class}_Caudoviricetes	Viruses	1	dsDNAphage	1	1	classified	VC61561	FALSE	TRUE	temperate
ma2024imeta	contig046952	contig046952	Duplodnaviria	Heunggongvirae	Uroviricota	Caudoviricetes	[Novel_Order]_{class}_Caudoviricetes	[Novel_Family]_{class}_Caudoviricetes	[Novel_Genus]_{class}_Caudoviricetes	Viruses	0.993	dsDNAphage	1	3	classified	VC40757	FALSE	TRUE	temperate
ma2024imeta	contig046967	contig046967	Duplodnaviria	Heunggongvirae	Uroviricota	Caudoviricetes	[Novel_Order]_{class}_Caudoviricetes	[Novel_Family]_{class}_Caudoviricetes	[Novel_Genus]_{class}_Caudoviricetes	Viruses	0.987	dsDNAphage	1	1	classified	VC24905	FALSE	TRUE	virulent
ma2024imeta	contig046980	contig046980	Duplodnaviria	Heunggongvirae	Uroviricota	Caudoviricetes	[Novel_Order]_{class}_Caudoviricetes	[Novel_Family]_{class}_Caudoviricetes	[Novel_Genus]_{class}_Caudoviricetes	Viruses	0.973	dsDNAphage	1	3	classified	VC27416	FALSE	TRUE	temperate
ma2024imeta	contig047011	contig047011	Duplodnaviria	Heunggongvirae	Uroviricota	Caudoviricetes	[Novel_Order]_{class}_Caudoviricetes	[Novel_Family]_{class}_Caudoviricetes	[Novel_Genus]_{class}_Caudoviricetes	Viruses	1	dsDNAphage	1	1	classified	VC29837	FALSE	TRUE	temperate
ma2024imeta	contig047117	contig047117	Duplodnaviria	Heunggongvirae	Uroviricota	Caudoviricetes	[Novel_Order]_{class}_Caudoviricetes	[Novel_Family]_{class}_Caudoviricetes	[Novel_Genus]_{class}_Caudoviricetes	Viruses	0.987	dsDNAphage	1	1	classified	VC65526	FALSE	TRUE	virulent
ma2024imeta	contig047118	contig047118	Duplodnaviria	Heunggongvirae	Uroviricota	Caudoviricetes	[Novel_Order]_{class}_Caudoviricetes	[Novel_Family]_{class}_Caudoviricetes	[Novel_Genus]_{class}_Caudoviricetes	Viruses	1	dsDNAphage	1	1	classified	VC36702	FALSE	TRUE	virulent
ma2024imeta	contig047119	contig048054	Duplodnaviria	Heunggongvirae	Uroviricota	Caudoviricetes	[Novel_Order]_{class}_Caudoviricetes	[Novel_Family]_{class}_Caudoviricetes	[Novel_Genus]_{class}_Caudoviricetes	Viruses	0.993	dsDNAphage	1	1	classified	VC65256	FALSE	TRUE	virulent
ma2024imeta	contig047121	contig047121	Duplodnaviria	Heunggongvirae	Uroviricota	Caudoviricetes	[Novel_Order]_{class}_Caudoviricetes	[Novel_Family]_{class}_Caudoviricetes	[Novel_Genus]_{class}_Caudoviricetes	Viruses	0.96	dsDNAphage	1	1	classified	VC19149	FALSE	TRUE	temperate
ma2024imeta	contig047123	contig047123	Duplodnaviria	Heunggongvirae	Uroviricota	Caudoviricetes	[Novel_Order]_{class}_Caudoviricetes	[Novel_Family]_{class}_Caudoviricetes	[Novel_Genus]_{class}_Caudoviricetes	Viruses	1	dsDNAphage	1	1	classified	VC16763	FALSE	TRUE	virulent
ma2024imeta	contig047126	contig047126	Duplodnaviria	Heunggongvirae	Uroviricota	Caudoviricetes	[Novel_Order]_{class}_Caudoviricetes	[Novel_Family]_{class}_Caudoviricetes	[Novel_Genus]_{class}_Caudoviricetes	Viruses	1	dsDNAphage	1	1	classified	VC61840	FALSE	TRUE	virulent
ma2024imeta	contig047129	contig047129	Duplodnaviria	Heunggongvirae	Uroviricota	Caudoviricetes	[Novel_Order]_{class}_Caudoviricetes	[Novel_Family]_{class}_Caudoviricetes	[Novel_Genus]_{class}_Caudoviricetes	Viruses	1	dsDNAphage	1	1	classified	VC61660	FALSE	TRUE	temperate
ma2024imeta	contig047131	contig047131	Monodnaviria	Sangervirae	Phixviricota	Malgrandaviricetes	Petitvirales	Microviridae	[Novel_Genus]_{family}_Microviridae	Viruses	1	dsDNAphage	1	1	unclassified	VC77609	FALSE	FALSE	virulent
ma2024imeta	contig047136	contig047136	Duplodnaviria	Heunggongvirae	Uroviricota	Caudoviricetes	[Novel_Order]_{class}_Caudoviricetes	[Novel_Family]_{class}_Caudoviricetes	[Novel_Genus]_{class}_Caudoviricetes	Viruses	0.987	dsDNAphage	1	1	classified	VC10230	FALSE	TRUE	temperate
ma2024imeta	contig047143	contig047143	Monodnaviria	Sangervirae	Phixviricota	Malgrandaviricetes	Petitvirales	Microviridae	[Novel_Genus]_{family}_Microviridae	Viruses	1	ssDNA	1	4	unclassified	VC78529	FALSE	FALSE	virulent
ma2024imeta	contig047173	contig047173	Duplodnaviria	Heunggongvirae	Uroviricota	Caudoviricetes	[Novel_Order]_{class}_Caudoviricetes	[Novel_Family]_{class}_Caudoviricetes	[Novel_Genus]_{class}_Caudoviricetes	Viruses	0.993	dsDNAphage	1	1	classified	VC65417	FALSE	TRUE	virulent
ma2024imeta	contig047232	contig047232	Duplodnaviria	Heunggongvirae	Uroviricota	Caudoviricetes	[Novel_Order]_{class}_Caudoviricetes	[Novel_Family]_{class}_Caudoviricetes	[Novel_Genus]_{class}_Caudoviricetes	Viruses	0.993	dsDNAphage	1	3	classified	VC02568	FALSE	TRUE	temperate
ma2024imeta	contig047241	contig047241	Duplodnaviria	Heunggongvirae	Uroviricota	Caudoviricetes	[Novel_Order]_{class}_Caudoviricetes	[Novel_Family]_{class}_Caudoviricetes	[Novel_Genus]_{class}_Caudoviricetes	Viruses	1	dsDNAphage	1	1	classified	VC32612	FALSE	TRUE	temperate
ma2024imeta	contig047271	contig047271	Monodnaviria	Sangervirae	Phixviricota	Malgrandaviricetes	Petitvirales	Microviridae	[Novel_Genus]_{family}_Microviridae	Viruses	0.987	dsDNAphage	1	4	unclassified	VC77610	FALSE	FALSE	virulent
ma2024imeta	contig047272	contig047272	Duplodnaviria	Heunggongvirae	Uroviricota	Caudoviricetes	[Novel_Order]_{class}_Caudoviricetes	[Novel_Family]_{class}_Caudoviricetes	[Novel_Genus]_{class}_Caudoviricetes	Viruses	1	dsDNAphage	1	3	classified	VC27575	FALSE	TRUE	virulent
ma2024imeta	contig047326	contig047326	Duplodnaviria	Heunggongvirae	Uroviricota	Caudoviricetes	Crassvirales	Steigviridae	[Novel_Genus]_{family}_Steigviridae	Viruses	1	dsDNAphage	1	3	classified	VC00179	FALSE	TRUE	virulent
ma2024imeta	contig047400	contig052741	Duplodnaviria	Heunggongvirae	Uroviricota	Caudoviricetes	[Novel_Order]_{class}_Caudoviricetes	[Novel_Family]_{class}_Caudoviricetes	[Novel_Genus]_{class}_Caudoviricetes	Viruses	0.96	dsDNAphage	1	1	classified	VC65252	FALSE	TRUE	virulent
ma2024imeta	contig047404	contig047404	Duplodnaviria	Heunggongvirae	Uroviricota	Caudoviricetes	[Novel_Order]_{class}_Caudoviricetes	[Novel_Family]_{class}_Caudoviricetes	[Novel_Genus]_{class}_Caudoviricetes	Viruses	1	dsDNAphage	1	1	classified	VC65388	FALSE	TRUE	virulent
ma2024imeta	contig047408	contig047408	Duplodnaviria	Heunggongvirae	Uroviricota	Caudoviricetes	[Novel_Order]_{class}_Caudoviricetes	[Novel_Family]_{class}_Caudoviricetes	[Novel_Genus]_{class}_Caudoviricetes	Viruses	1	dsDNAphage	1	1	classified	VC65337	FALSE	TRUE	virulent
ma2024imeta	contig047409	contig047409	Duplodnaviria	Heunggongvirae	Uroviricota	Caudoviricetes	[Novel_Order]_{class}_Caudoviricetes	[Novel_Family]_{class}_Caudoviricetes	[Novel_Genus]_{class}_Caudoviricetes	Viruses	0.993	dsDNAphage	1	1	classified	VC59070	FALSE	TRUE	virulent
ma2024imeta	contig047410	contig047410	Duplodnaviria	Heunggongvirae	Uroviricota	Caudoviricetes	[Novel_Order]_{class}_Caudoviricetes	[Novel_Family]_{class}_Caudoviricetes	[Novel_Genus]_{class}_Caudoviricetes	Viruses	1	dsDNAphage	1	1	classified	VC46012	FALSE	TRUE	virulent
ma2024imeta	contig047411	contig047411	Duplodnaviria	Heunggongvirae	Uroviricota	Caudoviricetes	[Novel_Order]_{class}_Caudoviricetes	[Novel_Family]_{class}_Caudoviricetes	[Novel_Genus]_{class}_Caudoviricetes	Viruses	1	dsDNAphage	1	1	classified	VC59077	FALSE	TRUE	virulent
ma2024imeta	contig047448	contig047448	Duplodnaviria	Heunggongvirae	Uroviricota	Caudoviricetes	[Novel_Order]_{class}_Caudoviricetes	[Novel_Family]_{class}_Caudoviricetes	[Novel_Genus]_{class}_Caudoviricetes	Viruses	0.993	dsDNAphage	1	1	classified	VC57159	FALSE	TRUE	temperate
ma2024imeta	contig047450	contig047450	Monodnaviria	Sangervirae	Phixviricota	Malgrandaviricetes	Petitvirales	Microviridae	[Novel_Genus]_{family}_Microviridae	Viruses	1	dsDNAphage	1	1	unclassified	VC77611	FALSE	FALSE	virulent
ma2024imeta	contig047579	contig047579	Duplodnaviria	Heunggongvirae	Uroviricota	Caudoviricetes	[Novel_Order]_{class}_Caudoviricetes	[Novel_Family]_{class}_Caudoviricetes	[Novel_Genus]_{class}_Caudoviricetes	Viruses	0.993	dsDNAphage	1	1	classified	VC02422	FALSE	TRUE	temperate
ma2024imeta	contig047580	contig047580	Duplodnaviria	Heunggongvirae	Uroviricota	Caudoviricetes	[Novel_Order]_{class}_Caudoviricetes	[Novel_Family]_{class}_Caudoviricetes	[Novel_Genus]_{class}_Caudoviricetes	Viruses	0.993	dsDNAphage	1	3	classified	VC04907	FALSE	TRUE	virulent
ma2024imeta	contig047633	contig047633	Duplodnaviria	Heunggongvirae	Uroviricota	Caudoviricetes	[Novel_Order]_{class}_Caudoviricetes	[Novel_Family]_{class}_Caudoviricetes	[Novel_Genus]_{class}_Caudoviricetes	Viruses	0.993	dsDNAphage	1	4	classified	VC62947	FALSE	TRUE	temperate
ma2024imeta	contig047645	contig047645	Duplodnaviria	Heunggongvirae	Uroviricota	Caudoviricetes	[Novel_Order]_{class}_Caudoviricetes	[Novel_Family]_{class}_Caudoviricetes	[Novel_Genus]_{class}_Caudoviricetes	Viruses	0.993	dsDNAphage	1	2	classified	VC57671	FALSE	TRUE	temperate
ma2024imeta	contig047687	contig047687	Duplodnaviria	Heunggongvirae	Uroviricota	Caudoviricetes	[Novel_Order]_{class}_Caudoviricetes	[Novel_Family]_{class}_Caudoviricetes	[Novel_Genus]_{class}_Caudoviricetes	Viruses	1	dsDNAphage	1	1	classified	VC15339	FALSE	TRUE	virulent
ma2024imeta	contig047699	contig047699	Duplodnaviria	Heunggongvirae	Uroviricota	Caudoviricetes	[Novel_Order]_{class}_Caudoviricetes	[Novel_Family]_{class}_Caudoviricetes	[Novel_Genus]_{class}_Caudoviricetes	Viruses	0.987	dsDNAphage	1	2	classified	VC20881	FALSE	TRUE	temperate
ma2024imeta	contig047712	contig047712	Duplodnaviria	Heunggongvirae	Uroviricota	Caudoviricetes	[Novel_Order]_{class}_Caudoviricetes	[Novel_Family]_{class}_Caudoviricetes	[Novel_Genus]_{class}_Caudoviricetes	Viruses	1	dsDNAphage	1	4	classified	VC25130	FALSE	TRUE	virulent
ma2024imeta	contig047722	contig047722	Duplodnaviria	Heunggongvirae	Uroviricota	Caudoviricetes	[Novel_Order]_{class}_Caudoviricetes	[Novel_Family]_{class}_Caudoviricetes	[Novel_Genus]_{class}_Caudoviricetes	Viruses	0.913	dsDNAphage	1	1	classified	VC35582	FALSE	TRUE	virulent
ma2024imeta	contig047727	contig047727	Duplodnaviria	Heunggongvirae	Uroviricota	Caudoviricetes	[Novel_Order]_{class}_Caudoviricetes	[Novel_Family]_{class}_Caudoviricetes	[Novel_Genus]_{class}_Caudoviricetes	Viruses	0.987	dsDNAphage	1	2	classified	VC20324	FALSE	TRUE	temperate
ma2024imeta	contig047819	contig047819	Duplodnaviria	Heunggongvirae	Uroviricota	Caudoviricetes	[Novel_Order]_{class}_Caudoviricetes	[Novel_Family]_{class}_Caudoviricetes	[Novel_Genus]_{class}_Caudoviricetes	Viruses	1	dsDNAphage	1	1	classified	VC09545	FALSE	TRUE	temperate
ma2024imeta	contig047926	contig047926	Duplodnaviria	Heunggongvirae	Uroviricota	Caudoviricetes	[Novel_Order]_{class}_Caudoviricetes	[Novel_Family]_{class}_Caudoviricetes	[Novel_Genus]_{class}_Caudoviricetes	Viruses	1	dsDNAphage	1	1	classified	VC61462	FALSE	TRUE	temperate
ma2024imeta	contig047929	contig047929	Duplodnaviria	Heunggongvirae	Uroviricota	Caudoviricetes	[Novel_Order]_{class}_Caudoviricetes	[Novel_Family]_{class}_Caudoviricetes	[Novel_Genus]_{class}_Caudoviricetes	Viruses	1	dsDNAphage	1	1	classified	VC60303	FALSE	TRUE	virulent
ma2024imeta	contig047930	contig047930	Duplodnaviria	Heunggongvirae	Uroviricota	Caudoviricetes	[Novel_Order]_{class}_Caudoviricetes	[Novel_Family]_{class}_Caudoviricetes	[Novel_Genus]_{class}_Caudoviricetes	Viruses	1	dsDNAphage	1	1	classified	VC20577	FALSE	TRUE	virulent
ma2024imeta	contig047931	contig047931	Duplodnaviria	Heunggongvirae	Uroviricota	Caudoviricetes	[Novel_Order]_{class}_Caudoviricetes	[Novel_Family]_{class}_Caudoviricetes	[Novel_Genus]_{class}_Caudoviricetes	Viruses	0.987	dsDNAphage	1	1	classified	VC20776	FALSE	TRUE	temperate
ma2024imeta	contig047932	contig047932	Duplodnaviria	Heunggongvirae	Uroviricota	Caudoviricetes	[Novel_Order]_{class}_Caudoviricetes	[Novel_Family]_{class}_Caudoviricetes	[Novel_Genus]_{class}_Caudoviricetes	Viruses	0.98	dsDNAphage	1	1	classified	VC02512	FALSE	TRUE	temperate
ma2024imeta	contig047943	contig047943	Duplodnaviria	Heunggongvirae	Uroviricota	Caudoviricetes	[Novel_Order]_{class}_Caudoviricetes	[Novel_Family]_{class}_Caudoviricetes	[Novel_Genus]_{class}_Caudoviricetes	Viruses	1	dsDNAphage	1	3	classified	VC34840	FALSE	TRUE	virulent
ma2024imeta	contig048020	contig048020	Monodnaviria	Sangervirae	Phixviricota	Malgrandaviricetes	Petitvirales	Microviridae	[Novel_Genus]_{family}_Microviridae	Viruses	0.993	dsDNAphage	1	4	unclassified	VC78538	FALSE	FALSE	virulent
ma2024imeta	contig048085	contig048085	Duplodnaviria	Heunggongvirae	Uroviricota	Caudoviricetes	[Novel_Order]_{class}_Caudoviricetes	[Novel_Family]_{class}_Caudoviricetes	[Novel_Genus]_{class}_Caudoviricetes	Viruses	1	dsDNAphage	1	1	classified	VC26156	FALSE	TRUE	temperate
ma2024imeta	contig048269	contig048269	Duplodnaviria	Heunggongvirae	Uroviricota	Caudoviricetes	[Novel_Order]_{class}_Caudoviricetes	[Novel_Family]_{class}_Caudoviricetes	[Novel_Genus]_{class}_Caudoviricetes	Viruses	1	dsDNAphage	1	1	classified	VC20245	FALSE	TRUE	virulent
ma2024imeta	contig048270	contig048270	Duplodnaviria	Heunggongvirae	Uroviricota	Caudoviricetes	[Novel_Order]_{class}_Caudoviricetes	[Novel_Family]_{class}_Caudoviricetes	[Novel_Genus]_{class}_Caudoviricetes	Viruses	0.993	dsDNAphage	1	1	classified	VC61629	FALSE	TRUE	temperate
ma2024imeta	contig048271	contig048271	Duplodnaviria	Heunggongvirae	Uroviricota	Caudoviricetes	[Novel_Order]_{class}_Caudoviricetes	[Novel_Family]_{class}_Caudoviricetes	[Novel_Genus]_{class}_Caudoviricetes	Viruses	1	dsDNAphage	1	1	classified	VC68135	FALSE	TRUE	virulent
ma2024imeta	contig048272	contig048272	Duplodnaviria	Heunggongvirae	Uroviricota	Caudoviricetes	[Novel_Order]_{class}_Caudoviricetes	[Novel_Family]_{class}_Caudoviricetes	[Novel_Genus]_{class}_Caudoviricetes	Viruses	0.993	dsDNAphage	1	1	classified	VC35265	FALSE	TRUE	temperate
ma2024imeta	contig048275	contig048275	Duplodnaviria	Heunggongvirae	Uroviricota	Caudoviricetes	[Novel_Order]_{class}_Caudoviricetes	[Novel_Family]_{class}_Caudoviricetes	[Novel_Genus]_{class}_Caudoviricetes	Viruses	1	dsDNAphage	1	1	classified	VC45587	FALSE	TRUE	temperate
ma2024imeta	contig048305	contig048305	Duplodnaviria	Heunggongvirae	Uroviricota	Caudoviricetes	[Novel_Order]_{class}_Caudoviricetes	[Novel_Family]_{class}_Caudoviricetes	[Novel_Genus]_{class}_Caudoviricetes	Viruses	1	dsDNAphage	1	3	classified	VC33294	FALSE	TRUE	temperate
ma2024imeta	contig048360	contig048360	Duplodnaviria	Heunggongvirae	Uroviricota	Caudoviricetes	[Novel_Order]_{class}_Caudoviricetes	[Novel_Family]_{class}_Caudoviricetes	[Novel_Genus]_{class}_Caudoviricetes	Viruses	1	dsDNAphage	1	4	classified	VC44789	FALSE	TRUE	temperate
ma2024imeta	contig048590	contig048590	Duplodnaviria	Heunggongvirae	Uroviricota	Caudoviricetes	[Novel_Order]_{class}_Caudoviricetes	[Novel_Family]_{class}_Caudoviricetes	[Novel_Genus]_{class}_Caudoviricetes	Viruses	1	dsDNAphage	1	1	classified	VC15548	FALSE	TRUE	virulent
ma2024imeta	contig048595	contig048595	Duplodnaviria	Heunggongvirae	Uroviricota	Caudoviricetes	[Novel_Order]_{class}_Caudoviricetes	[Novel_Family]_{class}_Caudoviricetes	[Novel_Genus]_{class}_Caudoviricetes	Viruses	0.993	dsDNAphage	1	3	classified	VC16921	FALSE	TRUE	virulent
ma2024imeta	contig048738	contig048738	Monodnaviria	Sangervirae	Phixviricota	Malgrandaviricetes	Petitvirales	Microviridae	[Novel_Genus]_{family}_Microviridae	Viruses	1	dsDNAphage	1	1	classified	VC02449	FALSE	TRUE	virulent
ma2024imeta	contig048818	contig048818	Duplodnaviria	Heunggongvirae	Uroviricota	Caudoviricetes	[Novel_Order]_{class}_Caudoviricetes	[Novel_Family]_{class}_Caudoviricetes	[Novel_Genus]_{class}_Caudoviricetes	Viruses	1	dsDNAphage	1	2	classified	VC58024	FALSE	TRUE	virulent
ma2024imeta	contig048865	contig049528	Duplodnaviria	Heunggongvirae	Uroviricota	Caudoviricetes	[Novel_Order]_{class}_Caudoviricetes	[Novel_Family]_{class}_Caudoviricetes	[Novel_Genus]_{class}_Caudoviricetes	Viruses	1	dsDNAphage	1	2	classified	VC53128	FALSE	TRUE	temperate
ma2024imeta	contig048894	contig052787	Duplodnaviria	Heunggongvirae	Uroviricota	Caudoviricetes	[Novel_Order]_{class}_Caudoviricetes	[Novel_Family]_{class}_Caudoviricetes	[Novel_Genus]_{class}_Caudoviricetes	Viruses	1	dsDNAphage	1	1	classified	VC34840	FALSE	TRUE	virulent
ma2024imeta	contig048943	contig049298	Duplodnaviria	Heunggongvirae	Uroviricota	Caudoviricetes	[Novel_Order]_{class}_Caudoviricetes	[Novel_Family]_{class}_Caudoviricetes	[Novel_Genus]_{class}_Caudoviricetes	Viruses	1	dsDNAphage	1	3	classified	VC41266	FALSE	TRUE	temperate
ma2024imeta	contig048949	contig048949	Duplodnaviria	Heunggongvirae	Uroviricota	Caudoviricetes	[Novel_Order]_{class}_Caudoviricetes	[Novel_Family]_{class}_Caudoviricetes	[Novel_Genus]_{class}_Caudoviricetes	Viruses	0.993	dsDNAphage	1	1	classified	VC64852	FALSE	TRUE	virulent
ma2024imeta	contig048962	contig048962	Duplodnaviria	Heunggongvirae	Uroviricota	Caudoviricetes	[Novel_Order]_{class}_Caudoviricetes	[Novel_Family]_{class}_Caudoviricetes	[Novel_Genus]_{class}_Caudoviricetes	Viruses	1	dsDNAphage	1	2	classified	VC46006	FALSE	TRUE	virulent
ma2024imeta	contig049013	contig049013	Duplodnaviria	Heunggongvirae	Uroviricota	Caudoviricetes	[Novel_Order]_{class}_Caudoviricetes	[Novel_Family]_{class}_Caudoviricetes	[Novel_Genus]_{class}_Caudoviricetes	Viruses	0.993	dsDNAphage	1	1	classified	VC20769	FALSE	TRUE	virulent
ma2024imeta	contig049014	contig049014	Duplodnaviria	Heunggongvirae	Uroviricota	Caudoviricetes	[Novel_Order]_{class}_Caudoviricetes	[Novel_Family]_{class}_Caudoviricetes	[Novel_Genus]_{class}_Caudoviricetes	Viruses	0.987	dsDNAphage	1	1	classified	VC45607	FALSE	TRUE	virulent
ma2024imeta	contig049015	contig049015	Duplodnaviria	Heunggongvirae	Uroviricota	Caudoviricetes	[Novel_Order]_{class}_Caudoviricetes	[Novel_Family]_{class}_Caudoviricetes	[Novel_Genus]_{class}_Caudoviricetes	Viruses	1	dsDNAphage	1	1	classified	VC02485	FALSE	TRUE	temperate
ma2024imeta	contig049028	contig049028	Duplodnaviria	Heunggongvirae	Uroviricota	Caudoviricetes	[Novel_Order]_{class}_Caudoviricetes	[Novel_Family]_{class}_Caudoviricetes	[Novel_Genus]_{class}_Caudoviricetes	Viruses	1	dsDNAphage	1	1	classified	VC20302	FALSE	TRUE	virulent
ma2024imeta	contig049086	contig049086	Duplodnaviria	Heunggongvirae	Uroviricota	Caudoviricetes	[Novel_Order]_{class}_Caudoviricetes	[Novel_Family]_{class}_Caudoviricetes	[Novel_Genus]_{class}_Caudoviricetes	Viruses	1	dsDNAphage	1	3	classified	VC41277	FALSE	TRUE	temperate
ma2024imeta	contig049092	contig049092	Duplodnaviria	Heunggongvirae	Uroviricota	Caudoviricetes	Crassvirales	[Novel_Family]_{order}_Crassvirales	[Novel_Genus]_{order}_Crassvirales	Viruses	1	dsDNAphage	1	4	classified	VC00363	FALSE	TRUE	virulent
ma2024imeta	contig049104	contig049104	Duplodnaviria	Heunggongvirae	Uroviricota	Caudoviricetes	[Novel_Order]_{class}_Caudoviricetes	[Novel_Family]_{class}_Caudoviricetes	[Novel_Genus]_{class}_Caudoviricetes	Viruses	1	dsDNAphage	1	1	classified	VC48822	FALSE	TRUE	virulent
ma2024imeta	contig049149	contig049149	Duplodnaviria	Heunggongvirae	Uroviricota	Caudoviricetes	[Novel_Order]_{class}_Caudoviricetes	[Novel_Family]_{class}_Caudoviricetes	[Novel_Genus]_{class}_Caudoviricetes	Viruses	0.987	dsDNAphage	1	4	classified	VC52341	FALSE	TRUE	temperate
ma2024imeta	contig049254	contig049254	Duplodnaviria	Heunggongvirae	Uroviricota	Caudoviricetes	[Novel_Order]_{class}_Caudoviricetes	[Novel_Family]_{class}_Caudoviricetes	[Novel_Genus]_{class}_Caudoviricetes	Viruses	0.973	dsDNAphage	1	1	classified	VC25392	FALSE	TRUE	temperate
ma2024imeta	contig049363	contig049363	Duplodnaviria	Heunggongvirae	Uroviricota	Caudoviricetes	[Novel_Order]_{class}_Caudoviricetes	[Novel_Family]_{class}_Caudoviricetes	[Novel_Genus]_{class}_Caudoviricetes	Viruses	1	dsDNAphage	1	1	classified	VC48823	FALSE	TRUE	virulent
ma2024imeta	contig049380	contig049380	Duplodnaviria	Heunggongvirae	Uroviricota	Caudoviricetes	[Novel_Order]_{class}_Caudoviricetes	[Novel_Family]_{class}_Caudoviricetes	[Novel_Genus]_{class}_Caudoviricetes	Viruses	0.987	dsDNAphage	1	1	classified	VC70815	FALSE	TRUE	virulent
ma2024imeta	contig049383	contig049383	Duplodnaviria	Heunggongvirae	Uroviricota	Caudoviricetes	[Novel_Order]_{class}_Caudoviricetes	[Novel_Family]_{class}_Caudoviricetes	[Novel_Genus]_{class}_Caudoviricetes	Viruses	0.993	dsDNAphage	1	1	classified	VC20330	FALSE	TRUE	temperate
ma2024imeta	contig049385	contig049385	Duplodnaviria	Heunggongvirae	Uroviricota	Caudoviricetes	[Novel_Order]_{class}_Caudoviricetes	[Novel_Family]_{class}_Caudoviricetes	[Novel_Genus]_{class}_Caudoviricetes	Viruses	0.993	dsDNAphage	1	1	classified	VC43635	FALSE	TRUE	temperate
ma2024imeta	contig049387	contig049387	Duplodnaviria	Heunggongvirae	Uroviricota	Caudoviricetes	[Novel_Order]_{class}_Caudoviricetes	[Novel_Family]_{class}_Caudoviricetes	[Novel_Genus]_{class}_Caudoviricetes	Viruses	1	dsDNAphage	1	4	classified	VC53582	FALSE	TRUE	temperate
ma2024imeta	contig049388	contig138491	Duplodnaviria	Heunggongvirae	Uroviricota	Caudoviricetes	[Novel_Order]_{class}_Caudoviricetes	[Novel_Family]_{class}_Caudoviricetes	[Novel_Genus]_{class}_Caudoviricetes	Viruses	1	dsDNAphage	1	1	classified	VC61551	FALSE	TRUE	temperate
ma2024imeta	contig049392	contig049392	Monodnaviria	Sangervirae	Phixviricota	Malgrandaviricetes	Petitvirales	Microviridae	[Novel_Genus]_{family}_Microviridae	Viruses	1	dsDNAphage	1	1	unclassified	VC77612	FALSE	FALSE	virulent
ma2024imeta	contig049401	contig049401	Duplodnaviria	Heunggongvirae	Uroviricota	Caudoviricetes	[Novel_Order]_{class}_Caudoviricetes	[Novel_Family]_{class}_Caudoviricetes	[Novel_Genus]_{class}_Caudoviricetes	Viruses	0.98	dsDNAphage	1	1	classified	VC67245	FALSE	TRUE	virulent
ma2024imeta	contig049404	contig049404	Duplodnaviria	Heunggongvirae	Uroviricota	Caudoviricetes	[Novel_Order]_{class}_Caudoviricetes	[Novel_Family]_{class}_Caudoviricetes	[Novel_Genus]_{class}_Caudoviricetes	Viruses	1	dsDNAphage	1	1	classified	VC20683	FALSE	TRUE	virulent
ma2024imeta	contig049406	contig049406	Duplodnaviria	Heunggongvirae	Uroviricota	Caudoviricetes	[Novel_Order]_{class}_Caudoviricetes	[Novel_Family]_{class}_Caudoviricetes	[Novel_Genus]_{class}_Caudoviricetes	Viruses	1	dsDNAphage	1	1	classified	VC48499	FALSE	TRUE	temperate
ma2024imeta	contig049408	contig049408	Duplodnaviria	Heunggongvirae	Uroviricota	Caudoviricetes	[Novel_Order]_{class}_Caudoviricetes	[Novel_Family]_{class}_Caudoviricetes	[Novel_Genus]_{class}_Caudoviricetes	Viruses	1	dsDNAphage	1	1	classified	VC52995	FALSE	TRUE	temperate
ma2024imeta	contig049410	contig049410	Duplodnaviria	Heunggongvirae	Uroviricota	Caudoviricetes	[Novel_Order]_{class}_Caudoviricetes	[Novel_Family]_{class}_Caudoviricetes	[Novel_Genus]_{class}_Caudoviricetes	Viruses	1	dsDNAphage	1	1	classified	VC57109	FALSE	TRUE	temperate
ma2024imeta	contig049413	contig049413	Duplodnaviria	Heunggongvirae	Uroviricota	Caudoviricetes	[Novel_Order]_{class}_Caudoviricetes	[Novel_Family]_{class}_Caudoviricetes	[Novel_Genus]_{class}_Caudoviricetes	Viruses	0.98	dsDNAphage	1	1	classified	VC69182	FALSE	TRUE	virulent
ma2024imeta	contig049655	contig049655	Duplodnaviria	Heunggongvirae	Uroviricota	Caudoviricetes	[Novel_Order]_{class}_Caudoviricetes	[Novel_Family]_{class}_Caudoviricetes	[Novel_Genus]_{class}_Caudoviricetes	Viruses	0.993	dsDNAphage	1	1	classified	VC02103	FALSE	TRUE	temperate
ma2024imeta	contig049736	contig049736	Duplodnaviria	Heunggongvirae	Uroviricota	Caudoviricetes	[Novel_Order]_{class}_Caudoviricetes	[Novel_Family]_{class}_Caudoviricetes	[Novel_Genus]_{class}_Caudoviricetes	Viruses	1	dsDNAphage	1	1	classified	VC50426	FALSE	TRUE	virulent
ma2024imeta	contig049925	contig049925	Monodnaviria	Sangervirae	Phixviricota	Malgrandaviricetes	Petitvirales	Microviridae	[Novel_Genus]_{family}_Microviridae	Viruses	1	dsDNAphage	1	1	unclassified	VC77613	FALSE	FALSE	virulent
ma2024imeta	contig050105	contig050105	Duplodnaviria	Heunggongvirae	Uroviricota	Caudoviricetes	[Novel_Order]_{class}_Caudoviricetes	[Novel_Family]_{class}_Caudoviricetes	[Novel_Genus]_{class}_Caudoviricetes	Viruses	1	dsDNAphage	1	1	classified	VC27610	FALSE	TRUE	virulent
ma2024imeta	contig050423	contig050423	Duplodnaviria	Heunggongvirae	Uroviricota	Caudoviricetes	[Novel_Order]_{class}_Caudoviricetes	[Novel_Family]_{class}_Caudoviricetes	[Novel_Genus]_{class}_Caudoviricetes	Viruses	0.987	dsDNAphage	1	1	classified	VC62057	FALSE	TRUE	virulent
ma2024imeta	contig050462	contig050462	Duplodnaviria	Heunggongvirae	Uroviricota	Caudoviricetes	[Novel_Order]_{class}_Caudoviricetes	[Novel_Family]_{class}_Caudoviricetes	[Novel_Genus]_{class}_Caudoviricetes	Viruses	0.973	dsDNAphage	1	1	classified	VC48495	FALSE	TRUE	virulent
ma2024imeta	contig050606	contig050606	Duplodnaviria	Heunggongvirae	Uroviricota	Caudoviricetes	[Novel_Order]_{class}_Caudoviricetes	[Novel_Family]_{class}_Caudoviricetes	[Novel_Genus]_{class}_Caudoviricetes	Viruses	0.987	dsDNAphage	1	3	classified	VC28485	FALSE	TRUE	virulent
ma2024imeta	contig050649	contig050649	Duplodnaviria	Heunggongvirae	Uroviricota	Caudoviricetes	[Novel_Order]_{class}_Caudoviricetes	[Novel_Family]_{class}_Caudoviricetes	[Novel_Genus]_{class}_Caudoviricetes	Viruses	0.993	dsDNAphage	1	3	classified	VC66259	FALSE	TRUE	virulent
ma2024imeta	contig050662	contig050662	Duplodnaviria	Heunggongvirae	Uroviricota	Caudoviricetes	[Novel_Order]_{class}_Caudoviricetes	[Novel_Family]_{class}_Caudoviricetes	[Novel_Genus]_{class}_Caudoviricetes	Viruses	1	dsDNAphage	1	1	classified	VC27055	FALSE	TRUE	virulent
ma2024imeta	contig050693	contig050693	Duplodnaviria	Heunggongvirae	Uroviricota	Caudoviricetes	[Novel_Order]_{class}_Caudoviricetes	[Novel_Family]_{class}_Caudoviricetes	[Novel_Genus]_{class}_Caudoviricetes	Viruses	1	dsDNAphage	1	4	classified	VC75186	FALSE	TRUE	virulent
ma2024imeta	contig050701	contig051115	Duplodnaviria	Heunggongvirae	Uroviricota	Caudoviricetes	[Novel_Order]_{class}_Caudoviricetes	[Novel_Family]_{class}_Caudoviricetes	[Novel_Genus]_{class}_Caudoviricetes	Viruses	1	dsDNAphage	1	3	classified	VC75152	FALSE	TRUE	virulent
ma2024imeta	contig050713	contig050713	Duplodnaviria	Heunggongvirae	Uroviricota	Caudoviricetes	[Novel_Order]_{class}_Caudoviricetes	[Novel_Family]_{class}_Caudoviricetes	[Novel_Genus]_{class}_Caudoviricetes	Viruses	1	dsDNAphage	1	1	classified	VC70526	FALSE	TRUE	virulent
ma2024imeta	contig050715	contig050715	Duplodnaviria	Heunggongvirae	Uroviricota	Caudoviricetes	[Novel_Order]_{class}_Caudoviricetes	[Novel_Family]_{class}_Caudoviricetes	[Novel_Genus]_{class}_Caudoviricetes	Viruses	0.993	dsDNAphage	1	1	classified	VC64827	FALSE	TRUE	temperate
ma2024imeta	contig050718	contig050718	Duplodnaviria	Heunggongvirae	Uroviricota	Caudoviricetes	[Novel_Order]_{class}_Caudoviricetes	[Novel_Family]_{class}_Caudoviricetes	[Novel_Genus]_{class}_Caudoviricetes	Viruses	1	dsDNAphage	1	1	classified	VC45574	FALSE	TRUE	temperate
ma2024imeta	contig050721	contig050721	Duplodnaviria	Heunggongvirae	Uroviricota	Caudoviricetes	[Novel_Order]_{class}_Caudoviricetes	[Novel_Family]_{class}_Caudoviricetes	[Novel_Genus]_{class}_Caudoviricetes	Viruses	0.993	dsDNAphage	1	1	classified	VC66079	FALSE	TRUE	virulent
ma2024imeta	contig050724	contig050724	Duplodnaviria	Heunggongvirae	Uroviricota	Caudoviricetes	[Novel_Order]_{class}_Caudoviricetes	[Novel_Family]_{class}_Caudoviricetes	[Novel_Genus]_{class}_Caudoviricetes	Viruses	1	dsDNAphage	1	1	classified	VC33671	FALSE	TRUE	temperate
ma2024imeta	contig050727	contig050727	Duplodnaviria	Heunggongvirae	Uroviricota	Caudoviricetes	[Novel_Order]_{class}_Caudoviricetes	[Novel_Family]_{class}_Caudoviricetes	[Novel_Genus]_{class}_Caudoviricetes	Viruses	0.993	dsDNAphage	1	1	classified	VC27092	FALSE	TRUE	virulent
ma2024imeta	contig050730	contig050730	Duplodnaviria	Heunggongvirae	Uroviricota	Caudoviricetes	[Novel_Order]_{class}_Caudoviricetes	[Novel_Family]_{class}_Caudoviricetes	[Novel_Genus]_{class}_Caudoviricetes	Viruses	0.987	dsDNAphage	1	1	classified	VC29377	FALSE	TRUE	temperate
ma2024imeta	contig050783	contig050783	Duplodnaviria	Heunggongvirae	Uroviricota	Caudoviricetes	[Novel_Order]_{class}_Caudoviricetes	[Novel_Family]_{class}_Caudoviricetes	[Novel_Genus]_{class}_Caudoviricetes	Viruses	1	dsDNAphage	1	1	classified	VC59077	FALSE	TRUE	virulent
ma2024imeta	contig050895	contig050895	Duplodnaviria	Heunggongvirae	Uroviricota	Caudoviricetes	[Novel_Order]_{class}_Caudoviricetes	[Novel_Family]_{class}_Caudoviricetes	[Novel_Genus]_{class}_Caudoviricetes	Viruses	0.993	dsDNAphage	1	1	classified	VC48503	FALSE	TRUE	temperate
ma2024imeta	contig050993	contig050993	Monodnaviria	Sangervirae	Phixviricota	Malgrandaviricetes	Petitvirales	Microviridae	[Novel_Genus]_{family}_Microviridae	Viruses	1	dsDNAphage	1	1	unclassified	VC78583	FALSE	FALSE	virulent
ma2024imeta	contig051048	contig051048	Duplodnaviria	Heunggongvirae	Uroviricota	Caudoviricetes	[Novel_Order]_{class}_Caudoviricetes	[Novel_Family]_{class}_Caudoviricetes	[Novel_Genus]_{class}_Caudoviricetes	Viruses	0.987	dsDNAphage	1	3	classified	VC19669	FALSE	TRUE	virulent
ma2024imeta	contig051139	contig051139	Duplodnaviria	Heunggongvirae	Uroviricota	Caudoviricetes	Crassvirales	[Novel_Family]_{order}_Crassvirales	[Novel_Genus]_{order}_Crassvirales	Viruses	1	dsDNAphage	1	1	classified	VC00189	FALSE	TRUE	virulent
ma2024imeta	contig051326	contig051326	Duplodnaviria	Heunggongvirae	Uroviricota	Caudoviricetes	[Novel_Order]_{class}_Caudoviricetes	[Novel_Family]_{class}_Caudoviricetes	[Novel_Genus]_{class}_Caudoviricetes	Viruses	0.993	dsDNAphage	1	3	classified	VC29963	FALSE	TRUE	virulent
ma2024imeta	contig051423	contig051423	Duplodnaviria	Heunggongvirae	Uroviricota	Caudoviricetes	[Novel_Order]_{class}_Caudoviricetes	[Novel_Family]_{class}_Caudoviricetes	[Novel_Genus]_{class}_Caudoviricetes	Viruses	0.993	dsDNAphage	1	4	classified	VC05969	FALSE	TRUE	virulent
ma2024imeta	contig051573	contig051395	Monodnaviria	Sangervirae	Phixviricota	Malgrandaviricetes	Petitvirales	Microviridae	[Novel_Genus]_{family}_Microviridae	Viruses	1	ssDNA	1	4	classified	VC18347	FALSE	TRUE	virulent
ma2024imeta	contig051741	contig051741	Monodnaviria	Sangervirae	Phixviricota	Malgrandaviricetes	Petitvirales	Microviridae	[Novel_Genus]_{family}_Microviridae	Viruses	1	dsDNAphage	1	4	unclassified	VC78599	FALSE	FALSE	virulent
ma2024imeta	contig051862	contig051862	Monodnaviria	Sangervirae	Phixviricota	Malgrandaviricetes	Petitvirales	Microviridae	[Novel_Genus]_{family}_Microviridae	Viruses	0.993	dsDNAphage	1	1	unclassified	VC78604	FALSE	FALSE	virulent
ma2024imeta	contig051911	contig137407	Duplodnaviria	Heunggongvirae	Uroviricota	Caudoviricetes	[Novel_Order]_{class}_Caudoviricetes	[Novel_Family]_{class}_Caudoviricetes	[Novel_Genus]_{class}_Caudoviricetes	Viruses	1	dsDNAphage	1	1	classified	VC48542	FALSE	TRUE	temperate
ma2024imeta	contig051965	contig051965	Duplodnaviria	Heunggongvirae	Uroviricota	Caudoviricetes	[Novel_Order]_{class}_Caudoviricetes	[Novel_Family]_{class}_Caudoviricetes	[Novel_Genus]_{class}_Caudoviricetes	Viruses	0.993	dsDNAphage	1	3	classified	VC20451	FALSE	TRUE	virulent
ma2024imeta	contig052040	contig052040	Duplodnaviria	Heunggongvirae	Uroviricota	Caudoviricetes	[Novel_Order]_{class}_Caudoviricetes	[Novel_Family]_{class}_Caudoviricetes	[Novel_Genus]_{class}_Caudoviricetes	Viruses	0.993	dsDNAphage	1	1	classified	VC46026	FALSE	TRUE	virulent
ma2024imeta	contig052140	contig052140	Monodnaviria	Sangervirae	Phixviricota	Malgrandaviricetes	Petitvirales	Microviridae	[Novel_Genus]_{family}_Microviridae	Viruses	0.993	dsDNAphage	1	4	classified	VC02449	FALSE	TRUE	virulent
ma2024imeta	contig052220	contig052220	Monodnaviria	Sangervirae	Phixviricota	Malgrandaviricetes	Petitvirales	Microviridae	[Novel_Genus]_{family}_Microviridae	Viruses	0.993	dsDNAphage	1	4	unclassified	VC78611	FALSE	FALSE	virulent
ma2024imeta	contig052271	contig052271	Duplodnaviria	Heunggongvirae	Uroviricota	Caudoviricetes	[Novel_Order]_{class}_Caudoviricetes	[Novel_Family]_{class}_Caudoviricetes	[Novel_Genus]_{class}_Caudoviricetes	Viruses	0.993	dsDNAphage	1	1	classified	VC68732	FALSE	TRUE	virulent
ma2024imeta	contig052275	contig052275	Duplodnaviria	Heunggongvirae	Uroviricota	Caudoviricetes	[Novel_Order]_{class}_Caudoviricetes	[Novel_Family]_{class}_Caudoviricetes	[Novel_Genus]_{class}_Caudoviricetes	Viruses	1	dsDNAphage	1	1	classified	VC37962	FALSE	TRUE	temperate
ma2024imeta	contig052279	contig052279	Duplodnaviria	Heunggongvirae	Uroviricota	Caudoviricetes	[Novel_Order]_{class}_Caudoviricetes	[Novel_Family]_{class}_Caudoviricetes	[Novel_Genus]_{class}_Caudoviricetes	Viruses	0.993	dsDNAphage	1	1	classified	VC68732	FALSE	TRUE	virulent
ma2024imeta	contig052571	contig052571	Duplodnaviria	Heunggongvirae	Uroviricota	Caudoviricetes	[Novel_Order]_{class}_Caudoviricetes	[Novel_Family]_{class}_Caudoviricetes	[Novel_Genus]_{class}_Caudoviricetes	Viruses	0.993	dsDNAphage	1	3	classified	VC63557	FALSE	TRUE	temperate
ma2024imeta	contig052737	contig052737	Duplodnaviria	Heunggongvirae	Uroviricota	Caudoviricetes	[Novel_Order]_{class}_Caudoviricetes	[Novel_Family]_{class}_Caudoviricetes	[Novel_Genus]_{class}_Caudoviricetes	Viruses	1	dsDNAphage	1	2	classified	VC10052	FALSE	TRUE	virulent
ma2024imeta	contig052745	contig052745	Monodnaviria	Sangervirae	Phixviricota	Malgrandaviricetes	Petitvirales	Microviridae	[Novel_Genus]_{family}_Microviridae	Viruses	0.98	dsDNAphage	1	1	unclassified	VC78630	FALSE	FALSE	virulent
ma2024imeta	contig053110	contig053110	Duplodnaviria	Heunggongvirae	Uroviricota	Caudoviricetes	[Novel_Order]_{class}_Caudoviricetes	[Novel_Family]_{class}_Caudoviricetes	[Novel_Genus]_{class}_Caudoviricetes	Viruses	0.987	dsDNAphage	1	1	classified	VC67245	FALSE	TRUE	virulent
ma2024imeta	contig053112	contig053112	Monodnaviria	Sangervirae	Phixviricota	Malgrandaviricetes	Petitvirales	Microviridae	[Novel_Genus]_{family}_Microviridae	Viruses	0.973	dsDNAphage	1	1	unclassified	VC77616	FALSE	FALSE	virulent
ma2024imeta	contig053253	contig053253	Duplodnaviria	Heunggongvirae	Uroviricota	Caudoviricetes	[Novel_Order]_{class}_Caudoviricetes	[Novel_Family]_{class}_Caudoviricetes	[Novel_Genus]_{class}_Caudoviricetes	Viruses	1	dsDNAphage	1	1	classified	VC18805	FALSE	TRUE	virulent
ma2024imeta	contig053258	contig053258	Duplodnaviria	Heunggongvirae	Uroviricota	Caudoviricetes	[Novel_Order]_{class}_Caudoviricetes	[Novel_Family]_{class}_Caudoviricetes	[Novel_Genus]_{class}_Caudoviricetes	Viruses	0.987	dsDNAphage	1	3	classified	VC40058	FALSE	TRUE	temperate
ma2024imeta	contig053304	contig053304	Duplodnaviria	Heunggongvirae	Uroviricota	Caudoviricetes	[Novel_Order]_{class}_Caudoviricetes	[Novel_Family]_{class}_Caudoviricetes	[Novel_Genus]_{class}_Caudoviricetes	Viruses	0.993	dsDNAphage	1	1	classified	VC73649	FALSE	TRUE	temperate
ma2024imeta	contig053328	contig296785	Duplodnaviria	Heunggongvirae	Uroviricota	Caudoviricetes	[Novel_Order]_{class}_Caudoviricetes	[Novel_Family]_{class}_Caudoviricetes	[Novel_Genus]_{class}_Caudoviricetes	Viruses	1	dsDNAphage	1	1	classified	VC63512	FALSE	TRUE	virulent
ma2024imeta	contig053330	contig053330	Duplodnaviria	Heunggongvirae	Uroviricota	Caudoviricetes	[Novel_Order]_{class}_Caudoviricetes	[Novel_Family]_{class}_Caudoviricetes	[Novel_Genus]_{class}_Caudoviricetes	Viruses	1	dsDNAphage	1	1	classified	VC06086	FALSE	TRUE	temperate
ma2024imeta	contig053474	contig053474	Duplodnaviria	Heunggongvirae	Uroviricota	Caudoviricetes	[Novel_Order]_{class}_Caudoviricetes	[Novel_Family]_{class}_Caudoviricetes	[Novel_Genus]_{class}_Caudoviricetes	Viruses	1	dsDNAphage	1	1	classified	VC63007	FALSE	TRUE	temperate
ma2024imeta	contig053486	contig053486	Duplodnaviria	Heunggongvirae	Uroviricota	Caudoviricetes	[Novel_Order]_{class}_Caudoviricetes	[Novel_Family]_{class}_Caudoviricetes	[Novel_Genus]_{class}_Caudoviricetes	Viruses	0.967	dsDNAphage	1	1	classified	VC08407	FALSE	TRUE	virulent
ma2024imeta	contig053513	contig053513	Duplodnaviria	Heunggongvirae	Uroviricota	Caudoviricetes	[Novel_Order]_{class}_Caudoviricetes	[Novel_Family]_{class}_Caudoviricetes	[Novel_Genus]_{class}_Caudoviricetes	Viruses	0.993	dsDNAphage	1	3	classified	VC62072	FALSE	TRUE	virulent
ma2024imeta	contig053633	contig053633	Duplodnaviria	Heunggongvirae	Uroviricota	Caudoviricetes	[Novel_Order]_{class}_Caudoviricetes	[Novel_Family]_{class}_Caudoviricetes	[Novel_Genus]_{class}_Caudoviricetes	Viruses	0.973	dsDNAphage	1	3	classified	VC13972	FALSE	TRUE	temperate
ma2024imeta	contig053672	contig053672	Duplodnaviria	Heunggongvirae	Uroviricota	Caudoviricetes	[Novel_Order]_{class}_Caudoviricetes	[Novel_Family]_{class}_Caudoviricetes	[Novel_Genus]_{class}_Caudoviricetes	Viruses	1	dsDNAphage	1	4	classified	VC60260	FALSE	TRUE	temperate
ma2024imeta	contig053674	contig053674	Duplodnaviria	Heunggongvirae	Uroviricota	Caudoviricetes	[Novel_Order]_{class}_Caudoviricetes	[Novel_Family]_{class}_Caudoviricetes	[Novel_Genus]_{class}_Caudoviricetes	Viruses	1	dsDNAphage	1	1	classified	VC57589	FALSE	TRUE	virulent
ma2024imeta	contig053675	contig053675	Duplodnaviria	Heunggongvirae	Uroviricota	Caudoviricetes	[Novel_Order]_{class}_Caudoviricetes	[Novel_Family]_{class}_Caudoviricetes	[Novel_Genus]_{class}_Caudoviricetes	Viruses	0.967	dsDNAphage	1	4	classified	VC64273	FALSE	TRUE	virulent
ma2024imeta	contig053676	contig053676	Duplodnaviria	Heunggongvirae	Uroviricota	Caudoviricetes	[Novel_Order]_{class}_Caudoviricetes	[Novel_Family]_{class}_Caudoviricetes	[Novel_Genus]_{class}_Caudoviricetes	Viruses	0.993	dsDNAphage	1	1	classified	VC31587	FALSE	TRUE	temperate
ma2024imeta	contig053680	contig053680	Duplodnaviria	Heunggongvirae	Uroviricota	Caudoviricetes	[Novel_Order]_{class}_Caudoviricetes	[Novel_Family]_{class}_Caudoviricetes	[Novel_Genus]_{class}_Caudoviricetes	Viruses	0.993	dsDNAphage	1	1	classified	VC10915	FALSE	TRUE	temperate
ma2024imeta	contig053682	contig053682	Duplodnaviria	Heunggongvirae	Uroviricota	Caudoviricetes	[Novel_Order]_{class}_Caudoviricetes	[Novel_Family]_{class}_Caudoviricetes	[Novel_Genus]_{class}_Caudoviricetes	Viruses	0.993	dsDNAphage	1	1	classified	VC66192	FALSE	TRUE	temperate
ma2024imeta	contig053683	contig053683	Duplodnaviria	Heunggongvirae	Uroviricota	Caudoviricetes	[Novel_Order]_{class}_Caudoviricetes	[Novel_Family]_{class}_Caudoviricetes	[Novel_Genus]_{class}_Caudoviricetes	Viruses	0.98	dsDNAphage	1	1	classified	VC36601	FALSE	TRUE	temperate
ma2024imeta	contig053697	contig053697	Duplodnaviria	Heunggongvirae	Uroviricota	Caudoviricetes	[Novel_Order]_{class}_Caudoviricetes	[Novel_Family]_{class}_Caudoviricetes	[Novel_Genus]_{class}_Caudoviricetes	Viruses	1	dsDNAphage	1	2	classified	VC02431	FALSE	TRUE	virulent
SRR17030618	contig053759	contig053759	Duplodnaviria	Heunggongvirae	Uroviricota	Caudoviricetes	[Novel_Order]_{class}_Caudoviricetes	[Novel_Family]_{class}_Caudoviricetes	[Novel_Genus]_{class}_Caudoviricetes	Viruses	0.993	dsDNAphage	1	1	classified	VC64779	FALSE	TRUE	virulent
SRR17030619	contig053785	contig054870	Duplodnaviria	Heunggongvirae	Uroviricota	Caudoviricetes	[Unclassified_Order]_{family}_Schitoviridae	Schitoviridae	[Novel_Genus]_{family}_Schitoviridae	Viruses	0.993	dsDNAphage	1	1	classified	VC67148	FALSE	TRUE	virulent
SRR17030620	contig053913	contig053913	Duplodnaviria	Heunggongvirae	Uroviricota	Caudoviricetes	[Novel_Order]_{class}_Caudoviricetes	[Novel_Family]_{class}_Caudoviricetes	[Novel_Genus]_{class}_Caudoviricetes	Viruses	1	dsDNAphage	1	1	classified	VC63584	FALSE	TRUE	temperate
SRR17030620	contig053918	contig161834	Duplodnaviria	Heunggongvirae	Uroviricota	Caudoviricetes	[Novel_Order]_{class}_Caudoviricetes	[Novel_Family]_{class}_Caudoviricetes	[Novel_Genus]_{class}_Caudoviricetes	Viruses	1	dsDNAphage	1	4	classified	VC06076	FALSE	TRUE	temperate
SRR17030620	contig053960	contig053960	Duplodnaviria	Heunggongvirae	Uroviricota	Caudoviricetes	[Novel_Order]_{class}_Caudoviricetes	[Novel_Family]_{class}_Caudoviricetes	[Novel_Genus]_{class}_Caudoviricetes	Viruses	1	dsDNAphage	1	1	classified	VC56289	FALSE	TRUE	temperate
SRR17030621	contig054011	contig054011	Duplodnaviria	Heunggongvirae	Uroviricota	Caudoviricetes	[Novel_Order]_{class}_Caudoviricetes	[Novel_Family]_{class}_Caudoviricetes	[Novel_Genus]_{class}_Caudoviricetes	Viruses	1	dsDNAphage	1	1	classified	VC68826	FALSE	TRUE	virulent
SRR17030621	contig054032	contig054032	Duplodnaviria	Heunggongvirae	Uroviricota	Caudoviricetes	[Novel_Order]_{class}_Caudoviricetes	[Novel_Family]_{class}_Caudoviricetes	[Novel_Genus]_{class}_Caudoviricetes	Viruses	0.993	dsDNAphage	1	1	classified	VC59059	FALSE	TRUE	virulent
SRR17030621	contig054038	contig055879	Duplodnaviria	Heunggongvirae	Uroviricota	Caudoviricetes	[Novel_Order]_{class}_Caudoviricetes	[Novel_Family]_{class}_Caudoviricetes	[Novel_Genus]_{class}_Caudoviricetes	Viruses	0.96	dsDNAphage	1	2	classified	VC58015	TRUE	FALSE	temperate
SRR17030621	contig054042	contig054042	Duplodnaviria	Heunggongvirae	Uroviricota	Caudoviricetes	[Novel_Order]_{class}_Caudoviricetes	[Novel_Family]_{class}_Caudoviricetes	[Novel_Genus]_{class}_Caudoviricetes	Viruses	0.98	dsDNAphage	1	4	classified	VC57918	FALSE	TRUE	virulent
SRR17030621	contig054045	contig054145	Duplodnaviria	Heunggongvirae	Uroviricota	Caudoviricetes	[Novel_Order]_{class}_Caudoviricetes	[Novel_Family]_{class}_Caudoviricetes	[Novel_Genus]_{class}_Caudoviricetes	Viruses	1	dsDNAphage	1	1	classified	VC62090	FALSE	TRUE	virulent
SRR17030622	contig054129	contig054129	Duplodnaviria	Heunggongvirae	Uroviricota	Caudoviricetes	[Novel_Order]_{class}_Caudoviricetes	[Novel_Family]_{class}_Caudoviricetes	[Novel_Genus]_{class}_Caudoviricetes	Viruses	0.993	dsDNAphage	1	3	classified	VC64821	FALSE	TRUE	temperate
SRR17030624	contig054164	contig054164	Duplodnaviria	Heunggongvirae	Uroviricota	Caudoviricetes	[Novel_Order]_{class}_Caudoviricetes	[Novel_Family]_{class}_Caudoviricetes	[Novel_Genus]_{class}_Caudoviricetes	Viruses	1	dsDNAphage	1	2	classified	VC28443	FALSE	TRUE	virulent
SRR17030624	contig054203	contig054203	Duplodnaviria	Heunggongvirae	Uroviricota	Caudoviricetes	[Novel_Order]_{class}_Caudoviricetes	[Novel_Family]_{class}_Caudoviricetes	[Novel_Genus]_{class}_Caudoviricetes	Viruses	1	dsDNAphage	1	1	classified	VC73942	FALSE	TRUE	virulent
SRR17030625	contig054268	contig054268	Duplodnaviria	Heunggongvirae	Uroviricota	Caudoviricetes	[Novel_Order]_{class}_Caudoviricetes	[Novel_Family]_{class}_Caudoviricetes	[Novel_Genus]_{class}_Caudoviricetes	Viruses	1	dsDNAphage	1	4	classified	VC65381	FALSE	TRUE	virulent
SRR17030626	contig054327	contig054327	Duplodnaviria	Heunggongvirae	Uroviricota	Caudoviricetes	[Novel_Order]_{class}_Caudoviricetes	[Novel_Family]_{class}_Caudoviricetes	[Novel_Genus]_{class}_Caudoviricetes	Viruses	1	dsDNAphage	1	1	classified	VC60148	FALSE	TRUE	virulent
SRR17030626	contig054371	contig054371	Duplodnaviria	Heunggongvirae	Uroviricota	Caudoviricetes	Crassvirales	[Novel_Family]_{order}_Crassvirales	[Novel_Genus]_{order}_Crassvirales	Viruses	0.993	dsDNAphage	1	1	classified	VC00311	FALSE	TRUE	virulent
SRR17030627	contig054406	contig054406	Duplodnaviria	Heunggongvirae	Uroviricota	Caudoviricetes	[Novel_Order]_{class}_Caudoviricetes	[Novel_Family]_{class}_Caudoviricetes	[Novel_Genus]_{class}_Caudoviricetes	Viruses	1	dsDNAphage	1	1	classified	VC63779	FALSE	TRUE	temperate
SRR17030628	contig054437	contig054437	Duplodnaviria	Heunggongvirae	Uroviricota	Caudoviricetes	[Novel_Order]_{class}_Caudoviricetes	[Novel_Family]_{class}_Caudoviricetes	[Novel_Genus]_{class}_Caudoviricetes	Viruses	0.993	dsDNAphage	1	4	classified	VC41358	FALSE	TRUE	temperate
SRR17030629	contig054531	contig054531	Duplodnaviria	Heunggongvirae	Uroviricota	Caudoviricetes	[Novel_Order]_{class}_Caudoviricetes	[Novel_Family]_{class}_Caudoviricetes	[Novel_Genus]_{class}_Caudoviricetes	Viruses	1	dsDNAphage	1	4	classified	VC25362	FALSE	TRUE	temperate
SRR17030629	contig054544	contig054544	Duplodnaviria	Heunggongvirae	Uroviricota	Caudoviricetes	[Novel_Order]_{class}_Caudoviricetes	[Novel_Family]_{class}_Caudoviricetes	[Novel_Genus]_{class}_Caudoviricetes	Viruses	1	dsDNAphage	1	1	classified	VC04827	FALSE	TRUE	virulent
SRR17030630	contig054609	contig054609	Duplodnaviria	Heunggongvirae	Uroviricota	Caudoviricetes	[Novel_Order]_{class}_Caudoviricetes	[Novel_Family]_{class}_Caudoviricetes	[Novel_Genus]_{class}_Caudoviricetes	Viruses	0.993	dsDNAphage	1	1	classified	VC63779	FALSE	TRUE	temperate
SRR17030631	contig054662	contig054551	Duplodnaviria	Heunggongvirae	Uroviricota	Caudoviricetes	[Novel_Order]_{class}_Caudoviricetes	[Novel_Family]_{class}_Caudoviricetes	[Novel_Genus]_{class}_Caudoviricetes	Viruses	0.987	dsDNAphage	1	1	classified	VC51561	FALSE	TRUE	virulent
SRR17030631	contig054703	contig054703	Duplodnaviria	Heunggongvirae	Uroviricota	Caudoviricetes	[Novel_Order]_{class}_Caudoviricetes	[Novel_Family]_{class}_Caudoviricetes	[Novel_Genus]_{class}_Caudoviricetes	Viruses	0.993	dsDNAphage	1	1	classified	VC62497	FALSE	TRUE	temperate
SRR17030636	contig054868	contig054868	Duplodnaviria	Heunggongvirae	Uroviricota	Caudoviricetes	[Novel_Order]_{class}_Caudoviricetes	[Novel_Family]_{class}_Caudoviricetes	[Novel_Genus]_{class}_Caudoviricetes	Viruses	1	dsDNAphage	1	1	classified	VC62411	FALSE	TRUE	temperate
SRR17030637	contig054952	contig054952	Duplodnaviria	Heunggongvirae	Uroviricota	Caudoviricetes	[Novel_Order]_{class}_Caudoviricetes	[Novel_Family]_{class}_Caudoviricetes	[Novel_Genus]_{class}_Caudoviricetes	Viruses	0.987	dsDNAphage	1	1	classified	VC65395	FALSE	TRUE	virulent
SRR17030637	contig054953	contig054953	Duplodnaviria	Heunggongvirae	Uroviricota	Caudoviricetes	[Novel_Order]_{class}_Caudoviricetes	[Novel_Family]_{class}_Caudoviricetes	[Novel_Genus]_{class}_Caudoviricetes	Viruses	1	dsDNAphage	1	1	classified	VC63779	FALSE	TRUE	temperate
SRR17030637	contig054967	contig054967	Duplodnaviria	Heunggongvirae	Uroviricota	Caudoviricetes	Crassvirales	[Novel_Family]_{order}_Crassvirales	[Novel_Genus]_{order}_Crassvirales	Viruses	0.993	dsDNAphage	1	1	classified	VC00365	FALSE	TRUE	virulent
SRR17030639	contig054995	contig054995	Duplodnaviria	Heunggongvirae	Uroviricota	Caudoviricetes	[Novel_Order]_{class}_Caudoviricetes	[Novel_Family]_{class}_Caudoviricetes	[Novel_Genus]_{class}_Caudoviricetes	Viruses	0.993	dsDNAphage	1	2	classified	VC37962	FALSE	TRUE	temperate
SRR17030639	contig055053	contig055053	Duplodnaviria	Heunggongvirae	Uroviricota	Caudoviricetes	[Novel_Order]_{class}_Caudoviricetes	[Novel_Family]_{class}_Caudoviricetes	[Novel_Genus]_{class}_Caudoviricetes	Viruses	1	dsDNAphage	1	1	classified	VC04823	FALSE	TRUE	virulent
SRR17030639	contig055086	contig055086	Duplodnaviria	Heunggongvirae	Uroviricota	Caudoviricetes	[Novel_Order]_{class}_Caudoviricetes	[Novel_Family]_{class}_Caudoviricetes	[Novel_Genus]_{class}_Caudoviricetes	Viruses	0.96	dsDNAphage	1	1	classified	VC08407	FALSE	TRUE	virulent
SRR17030640	contig055104	contig055104	Duplodnaviria	Heunggongvirae	Uroviricota	Caudoviricetes	[Novel_Order]_{class}_Caudoviricetes	[Novel_Family]_{class}_Caudoviricetes	[Novel_Genus]_{class}_Caudoviricetes	Viruses	0.993	dsDNAphage	1	4	classified	VC63779	FALSE	TRUE	temperate
SRR17030640	contig055127	contig055127	Duplodnaviria	Heunggongvirae	Uroviricota	Caudoviricetes	[Novel_Order]_{class}_Caudoviricetes	[Novel_Family]_{class}_Caudoviricetes	[Novel_Genus]_{class}_Caudoviricetes	Viruses	1	dsDNAphage	1	1	classified	VC62409	FALSE	TRUE	virulent
SRR17030640	contig055157	contig055157	Duplodnaviria	Heunggongvirae	Uroviricota	Caudoviricetes	[Novel_Order]_{class}_Caudoviricetes	[Novel_Family]_{class}_Caudoviricetes	[Novel_Genus]_{class}_Caudoviricetes	Viruses	0.987	dsDNAphage	1	3	classified	VC43104	FALSE	TRUE	temperate
SRR17030640	contig055165	contig055165	Duplodnaviria	Heunggongvirae	Uroviricota	Caudoviricetes	Crassvirales	[Novel_Family]_{order}_Crassvirales	[Novel_Genus]_{order}_Crassvirales	Viruses	1	dsDNAphage	1	1	classified	VC00140	FALSE	TRUE	virulent
SRR17030640	contig055199	contig055199	Duplodnaviria	Heunggongvirae	Uroviricota	Caudoviricetes	[Novel_Order]_{class}_Caudoviricetes	[Novel_Family]_{class}_Caudoviricetes	[Novel_Genus]_{class}_Caudoviricetes	Viruses	0.987	dsDNAphage	1	1	classified	VC57063	FALSE	TRUE	temperate
SRR17030640	contig055200	contig055200	Duplodnaviria	Heunggongvirae	Uroviricota	Caudoviricetes	[Novel_Order]_{class}_Caudoviricetes	[Novel_Family]_{class}_Caudoviricetes	[Novel_Genus]_{class}_Caudoviricetes	Viruses	0.987	dsDNAphage	1	1	classified	VC45787	FALSE	TRUE	virulent
SRR17030641	contig055210	contig142996	Duplodnaviria	Heunggongvirae	Uroviricota	Caudoviricetes	[Novel_Order]_{class}_Caudoviricetes	[Novel_Family]_{class}_Caudoviricetes	[Novel_Genus]_{class}_Caudoviricetes	Viruses	0.993	dsDNAphage	1	1	classified	VC63709	FALSE	TRUE	temperate
SRR17030641	contig055215	contig055215	Duplodnaviria	Heunggongvirae	Uroviricota	Caudoviricetes	[Novel_Order]_{class}_Caudoviricetes	[Novel_Family]_{class}_Caudoviricetes	[Novel_Genus]_{class}_Caudoviricetes	Viruses	0.98	dsDNAphage	1	3	classified	VC33368	FALSE	TRUE	temperate
SRR17030641	contig055246	contig055246	Duplodnaviria	Heunggongvirae	Uroviricota	Caudoviricetes	[Novel_Order]_{class}_Caudoviricetes	[Novel_Family]_{class}_Caudoviricetes	[Novel_Genus]_{class}_Caudoviricetes	Viruses	0.993	dsDNAphage	1	4	classified	VC68732	FALSE	TRUE	virulent
SRR17030642	contig055313	contig055313	Duplodnaviria	Heunggongvirae	Uroviricota	Caudoviricetes	[Novel_Order]_{class}_Caudoviricetes	[Novel_Family]_{class}_Caudoviricetes	[Novel_Genus]_{class}_Caudoviricetes	Viruses	1	dsDNAphage	1	3	classified	VC59054	FALSE	TRUE	virulent
SRR17030642	contig055349	contig055349	Duplodnaviria	Heunggongvirae	Uroviricota	Caudoviricetes	[Novel_Order]_{class}_Caudoviricetes	[Novel_Family]_{class}_Caudoviricetes	[Novel_Genus]_{class}_Caudoviricetes	Viruses	1	dsDNAphage	1	1	classified	VC35113	FALSE	TRUE	temperate
SRR17030642	contig055377	contig055377	Duplodnaviria	Heunggongvirae	Uroviricota	Caudoviricetes	[Novel_Order]_{class}_Caudoviricetes	[Novel_Family]_{class}_Caudoviricetes	[Novel_Genus]_{class}_Caudoviricetes	Viruses	0.993	dsDNAphage	1	2	classified	VC67615	FALSE	TRUE	temperate
SRR17030644	contig055440	contig055440	Duplodnaviria	Heunggongvirae	Uroviricota	Caudoviricetes	[Novel_Order]_{class}_Caudoviricetes	[Novel_Family]_{class}_Caudoviricetes	[Novel_Genus]_{class}_Caudoviricetes	Viruses	1	dsDNAphage	1	1	classified	VC62448	FALSE	TRUE	temperate
SRR17030644	contig055500	contig055853	Duplodnaviria	Heunggongvirae	Uroviricota	Caudoviricetes	[Novel_Order]_{class}_Caudoviricetes	[Novel_Family]_{class}_Caudoviricetes	[Novel_Genus]_{class}_Caudoviricetes	Viruses	0.953	dsDNAphage	1	3	classified	VC32670	FALSE	TRUE	temperate
SRR17030645	contig055547	contig055547	Monodnaviria	Sangervirae	Phixviricota	Malgrandaviricetes	Petitvirales	Microviridae	[Novel_Genus]_{family}_Microviridae	Viruses	0.993	dsDNAphage	1	4	classified	VC18349	FALSE	TRUE	virulent
SRR17030645	contig055595	contig053983	Duplodnaviria	Heunggongvirae	Uroviricota	Caudoviricetes	[Novel_Order]_{class}_Caudoviricetes	[Novel_Family]_{class}_Caudoviricetes	[Novel_Genus]_{class}_Caudoviricetes	Viruses	1	dsDNAphage	1	1	classified	VC65390	FALSE	TRUE	virulent
SRR17030645	contig055597	contig055597	Duplodnaviria	Heunggongvirae	Uroviricota	Caudoviricetes	[Novel_Order]_{class}_Caudoviricetes	[Novel_Family]_{class}_Caudoviricetes	[Novel_Genus]_{class}_Caudoviricetes	Viruses	0.993	dsDNAphage	1	1	classified	VC64849	FALSE	TRUE	virulent
SRR17030645	contig055598	contig055598	Duplodnaviria	Heunggongvirae	Uroviricota	Caudoviricetes	Crassvirales	Suoliviridae	[Novel_Genus]_{family}_Suoliviridae	Viruses	1	dsDNAphage	1	1	classified	VC00367	FALSE	TRUE	virulent
SRR17030645	contig055599	contig055599	Duplodnaviria	Heunggongvirae	Uroviricota	Caudoviricetes	[Novel_Order]_{class}_Caudoviricetes	[Novel_Family]_{class}_Caudoviricetes	[Novel_Genus]_{class}_Caudoviricetes	Viruses	0.993	dsDNAphage	1	1	classified	VC00171	FALSE	TRUE	virulent
SRR17030645	contig055601	contig055601	Duplodnaviria	Heunggongvirae	Uroviricota	Caudoviricetes	[Novel_Order]_{class}_Caudoviricetes	[Novel_Family]_{class}_Caudoviricetes	[Novel_Genus]_{class}_Caudoviricetes	Viruses	1	dsDNAphage	1	1	classified	VC10235	FALSE	TRUE	temperate
SRR17030646	contig055626	contig055626	Duplodnaviria	Heunggongvirae	Uroviricota	Caudoviricetes	[Novel_Order]_{class}_Caudoviricetes	[Novel_Family]_{class}_Caudoviricetes	[Novel_Genus]_{class}_Caudoviricetes	Viruses	0.98	dsDNAphage	1	4	classified	VC38815	FALSE	TRUE	temperate
SRR17030646	contig055642	contig137886	Duplodnaviria	Heunggongvirae	Uroviricota	Caudoviricetes	[Novel_Order]_{class}_Caudoviricetes	[Novel_Family]_{class}_Caudoviricetes	[Novel_Genus]_{class}_Caudoviricetes	Viruses	0.96	dsDNAphage	1	3	classified	VC64316	FALSE	TRUE	virulent
SRR17030646	contig055730	contig055877	Duplodnaviria	Heunggongvirae	Uroviricota	Caudoviricetes	[Novel_Order]_{class}_Caudoviricetes	[Novel_Family]_{class}_Caudoviricetes	[Novel_Genus]_{class}_Caudoviricetes	Viruses	0.993	dsDNAphage	1	1	classified	VC14618	FALSE	TRUE	virulent
SRR17030647	contig055800	contig055800	Duplodnaviria	Heunggongvirae	Uroviricota	Caudoviricetes	[Novel_Order]_{class}_Caudoviricetes	[Novel_Family]_{class}_Caudoviricetes	[Novel_Genus]_{class}_Caudoviricetes	Viruses	1	dsDNAphage	1	3	classified	VC69171	FALSE	TRUE	virulent
SRR17030647	contig055806	contig055806	Duplodnaviria	Heunggongvirae	Uroviricota	Caudoviricetes	[Novel_Order]_{class}_Caudoviricetes	[Novel_Family]_{class}_Caudoviricetes	[Novel_Genus]_{class}_Caudoviricetes	Viruses	0.993	dsDNAphage	1	1	classified	VC62486	FALSE	TRUE	virulent
SRR17030649	contig055922	contig055922	Duplodnaviria	Heunggongvirae	Uroviricota	Caudoviricetes	[Novel_Order]_{class}_Caudoviricetes	[Novel_Family]_{class}_Caudoviricetes	[Novel_Genus]_{class}_Caudoviricetes	Viruses	1	dsDNAphage	1	1	classified	VC45445	FALSE	TRUE	virulent
SRR17030651	contig055969	contig055969	Duplodnaviria	Heunggongvirae	Uroviricota	Caudoviricetes	[Novel_Order]_{class}_Caudoviricetes	[Novel_Family]_{class}_Caudoviricetes	[Novel_Genus]_{class}_Caudoviricetes	Viruses	0.98	dsDNAphage	1	4	classified	VC62951	FALSE	TRUE	temperate
SRR17030652	contig056070	contig056070	Duplodnaviria	Heunggongvirae	Uroviricota	Caudoviricetes	[Novel_Order]_{class}_Caudoviricetes	[Novel_Family]_{class}_Caudoviricetes	[Novel_Genus]_{class}_Caudoviricetes	Viruses	0.98	dsDNAphage	1	3	classified	VC32071	FALSE	TRUE	temperate
SRR17030652	contig056166	contig056166	Duplodnaviria	Heunggongvirae	Uroviricota	Caudoviricetes	[Novel_Order]_{class}_Caudoviricetes	[Novel_Family]_{class}_Caudoviricetes	[Novel_Genus]_{class}_Caudoviricetes	Viruses	1	dsDNAphage	1	2	classified	VC15848	FALSE	TRUE	virulent
SRR17030652	contig056167	contig056167	Duplodnaviria	Heunggongvirae	Uroviricota	Caudoviricetes	[Novel_Order]_{class}_Caudoviricetes	[Novel_Family]_{class}_Caudoviricetes	[Novel_Genus]_{class}_Caudoviricetes	Viruses	1	dsDNAphage	1	1	classified	VC30457	FALSE	TRUE	temperate
SRR17030652	contig056168	contig056168	Monodnaviria	Sangervirae	Phixviricota	Malgrandaviricetes	Petitvirales	Microviridae	[Novel_Genus]_{family}_Microviridae	Viruses	0.98	dsDNAphage	1	1	unclassified	VC77617	FALSE	FALSE	virulent
SRR17030652	contig056169	contig056169	Duplodnaviria	Heunggongvirae	Uroviricota	Caudoviricetes	[Novel_Order]_{class}_Caudoviricetes	[Novel_Family]_{class}_Caudoviricetes	[Novel_Genus]_{class}_Caudoviricetes	Viruses	1	dsDNAphage	1	1	classified	VC46950	FALSE	TRUE	virulent
SRR19631093	contig056285	contig056285	Duplodnaviria	Heunggongvirae	Uroviricota	Caudoviricetes	[Novel_Order]_{class}_Caudoviricetes	[Novel_Family]_{class}_Caudoviricetes	[Novel_Genus]_{class}_Caudoviricetes	Viruses	1	dsDNAphage	1	2	classified	VC01834	FALSE	TRUE	temperate
SRR19631093	contig056295	contig056295	Duplodnaviria	Heunggongvirae	Uroviricota	Caudoviricetes	[Novel_Order]_{class}_Caudoviricetes	[Novel_Family]_{class}_Caudoviricetes	[Novel_Genus]_{class}_Caudoviricetes	Viruses	0.987	dsDNAphage	1	2	classified	VC42010	FALSE	TRUE	temperate
SRR19631093	contig056349	contig056349	Duplodnaviria	Heunggongvirae	Uroviricota	Caudoviricetes	[Novel_Order]_{class}_Caudoviricetes	[Novel_Family]_{class}_Caudoviricetes	[Novel_Genus]_{class}_Caudoviricetes	Viruses	0.993	dsDNAphage	1	1	classified	VC48148	FALSE	TRUE	temperate
SRR19631093	contig056377	contig056377	Duplodnaviria	Heunggongvirae	Uroviricota	Caudoviricetes	[Novel_Order]_{class}_Caudoviricetes	[Novel_Family]_{class}_Caudoviricetes	[Novel_Genus]_{class}_Caudoviricetes	Viruses	0.993	dsDNAphage	1	2	classified	VC49643	FALSE	TRUE	virulent
SRR19631094	contig056437	contig056437	Duplodnaviria	Heunggongvirae	Uroviricota	Caudoviricetes	[Novel_Order]_{class}_Caudoviricetes	[Novel_Family]_{class}_Caudoviricetes	[Novel_Genus]_{class}_Caudoviricetes	Viruses	0.993	dsDNAphage	1	1	classified	VC21606	FALSE	TRUE	temperate
SRR19631094	contig056459	contig056459	Duplodnaviria	Heunggongvirae	Uroviricota	Caudoviricetes	[Unclassified_Order]_{family}_Rountreeviridae	Rountreeviridae	Minhovirus	Viruses	1	dsDNAphage	1	2	classified	VC74788	TRUE	FALSE	virulent
SRR19631094	contig056509	contig056509	Duplodnaviria	Heunggongvirae	Uroviricota	Caudoviricetes	[Novel_Order]_{class}_Caudoviricetes	[Novel_Family]_{class}_Caudoviricetes	[Novel_Genus]_{class}_Caudoviricetes	Viruses	0.993	dsDNAphage	1	1	classified	VC01909	FALSE	TRUE	temperate
SRR19631094	contig056529	contig056529	Duplodnaviria	Heunggongvirae	Uroviricota	Caudoviricetes	[Novel_Order]_{class}_Caudoviricetes	[Novel_Family]_{class}_Caudoviricetes	[Novel_Genus]_{class}_Caudoviricetes	Viruses	1	dsDNAphage	1	1	classified	VC06463	FALSE	TRUE	virulent
SRR19631094	contig056543	contig056543	Duplodnaviria	Heunggongvirae	Uroviricota	Caudoviricetes	[Novel_Order]_{class}_Caudoviricetes	[Novel_Family]_{class}_Caudoviricetes	[Novel_Genus]_{class}_Caudoviricetes	Viruses	1	dsDNAphage	1	1	classified	VC48148	FALSE	TRUE	temperate
SRR19631094	contig056554	contig056554	Duplodnaviria	Heunggongvirae	Uroviricota	Caudoviricetes	[Novel_Order]_{class}_Caudoviricetes	[Novel_Family]_{class}_Caudoviricetes	[Novel_Genus]_{class}_Caudoviricetes	Viruses	1	dsDNAphage	1	1	classified	VC32852	FALSE	TRUE	temperate
SRR19631095	contig056571	contig056571	Duplodnaviria	Heunggongvirae	Uroviricota	Caudoviricetes	[Novel_Order]_{class}_Caudoviricetes	[Novel_Family]_{class}_Caudoviricetes	[Novel_Genus]_{class}_Caudoviricetes	Viruses	0.993	dsDNAphage	1	1	classified	VC21471	FALSE	TRUE	virulent
SRR19631095	contig056588	contig057833	Duplodnaviria	Heunggongvirae	Uroviricota	Caudoviricetes	[Novel_Order]_{class}_Caudoviricetes	[Novel_Family]_{class}_Caudoviricetes	[Novel_Genus]_{class}_Caudoviricetes	Viruses	1	dsDNAphage	1	1	classified	VC52381	FALSE	TRUE	virulent
SRR19631103	contig056742	contig056742	Duplodnaviria	Heunggongvirae	Uroviricota	Caudoviricetes	[Novel_Order]_{class}_Caudoviricetes	[Novel_Family]_{class}_Caudoviricetes	[Novel_Genus]_{class}_Caudoviricetes	Viruses	1	dsDNAphage	1	2	classified	VC73993	FALSE	TRUE	virulent
SRR19631103	contig056757	contig056757	Duplodnaviria	Heunggongvirae	Uroviricota	Caudoviricetes	[Novel_Order]_{class}_Caudoviricetes	[Novel_Family]_{class}_Caudoviricetes	[Novel_Genus]_{class}_Caudoviricetes	Viruses	1	dsDNAphage	1	2	classified	VC21464	FALSE	TRUE	virulent
SRR19631103	contig056781	contig056781	Duplodnaviria	Heunggongvirae	Uroviricota	Caudoviricetes	[Novel_Order]_{class}_Caudoviricetes	[Novel_Family]_{class}_Caudoviricetes	[Novel_Genus]_{class}_Caudoviricetes	Viruses	0.993	dsDNAphage	1	2	classified	VC58716	FALSE	TRUE	temperate
SRR19631104	contig056831	contig056831	Duplodnaviria	Heunggongvirae	Uroviricota	Caudoviricetes	[Novel_Order]_{class}_Caudoviricetes	[Novel_Family]_{class}_Caudoviricetes	[Novel_Genus]_{class}_Caudoviricetes	Viruses	1	dsDNAphage	1	1	classified	VC72004	FALSE	TRUE	virulent
SRR19631104	contig056847	contig056847	Duplodnaviria	Heunggongvirae	Uroviricota	Caudoviricetes	[Novel_Order]_{class}_Caudoviricetes	[Novel_Family]_{class}_Caudoviricetes	[Novel_Genus]_{class}_Caudoviricetes	Viruses	1	dsDNAphage	1	1	classified	VC49781	FALSE	TRUE	virulent
SRR19631104	contig056890	contig056890	Duplodnaviria	Heunggongvirae	Uroviricota	Caudoviricetes	[Novel_Order]_{class}_Caudoviricetes	[Novel_Family]_{class}_Caudoviricetes	[Novel_Genus]_{class}_Caudoviricetes	Viruses	1	dsDNAphage	1	3	classified	VC33326	FALSE	TRUE	temperate
SRR19631104	contig056901	contig171876	Duplodnaviria	Heunggongvirae	Uroviricota	Caudoviricetes	[Novel_Order]_{class}_Caudoviricetes	[Novel_Family]_{class}_Caudoviricetes	[Novel_Genus]_{class}_Caudoviricetes	Viruses	0.993	dsDNAphage	1	1	classified	VC08769	FALSE	TRUE	virulent
SRR19631104	contig056953	contig056953	Duplodnaviria	Heunggongvirae	Uroviricota	Caudoviricetes	[Novel_Order]_{class}_Caudoviricetes	[Novel_Family]_{class}_Caudoviricetes	[Novel_Genus]_{class}_Caudoviricetes	Viruses	1	dsDNAphage	1	1	classified	VC52457	FALSE	TRUE	temperate
SRR19631105	contig056991	contig056991	Duplodnaviria	Heunggongvirae	Uroviricota	Caudoviricetes	[Novel_Order]_{class}_Caudoviricetes	[Novel_Family]_{class}_Caudoviricetes	[Novel_Genus]_{class}_Caudoviricetes	Viruses	0.987	dsDNAphage	1	3	classified	VC74815	FALSE	TRUE	virulent
SRR19631112	contig057069	contig057069	Duplodnaviria	Heunggongvirae	Uroviricota	Caudoviricetes	[Unclassified_Order]_{family}_Drexlerviridae	Drexlerviridae	Tunavirus	Viruses	0.993	dsDNAphage	1	1	classified	VC71876	TRUE	FALSE	virulent
SRR19631112	contig057094	contig057094	Duplodnaviria	Heunggongvirae	Uroviricota	Caudoviricetes	[Unclassified_Order]_{family}_Chaseviridae	Chaseviridae	[Novel_Genus]_{family}_Chaseviridae	Viruses	1	dsDNAphage	1	1	classified	VC70465	TRUE	FALSE	virulent
SRR19631112	contig057111	contig057433	Duplodnaviria	Heunggongvirae	Uroviricota	Caudoviricetes	[Novel_Order]_{class}_Caudoviricetes	[Novel_Family]_{class}_Caudoviricetes	[Novel_Genus]_{class}_Caudoviricetes	Viruses	0.987	dsDNAphage	1	1	classified	VC06463	FALSE	TRUE	virulent
SRR19631112	contig057126	contig057126	Duplodnaviria	Heunggongvirae	Uroviricota	Caudoviricetes	[Novel_Order]_{class}_Caudoviricetes	[Novel_Family]_{class}_Caudoviricetes	[Novel_Genus]_{class}_Caudoviricetes	Viruses	0.993	dsDNAphage	1	1	classified	VC72233	TRUE	FALSE	virulent
SRR19631112	contig057141	contig057141	Duplodnaviria	Heunggongvirae	Uroviricota	Caudoviricetes	[Novel_Order]_{class}_Caudoviricetes	[Novel_Family]_{class}_Caudoviricetes	[Novel_Genus]_{class}_Caudoviricetes	Viruses	1	dsDNAphage	1	1	classified	VC66134	FALSE	TRUE	virulent
SRR19631112	contig057171	contig057171	Duplodnaviria	Heunggongvirae	Uroviricota	Caudoviricetes	[Novel_Order]_{class}_Caudoviricetes	[Novel_Family]_{class}_Caudoviricetes	[Novel_Genus]_{class}_Caudoviricetes	Viruses	0.987	dsDNAphage	1	1	classified	VC00273	FALSE	TRUE	virulent
SRR19631113	contig057293	contig057293	Duplodnaviria	Heunggongvirae	Uroviricota	Caudoviricetes	[Novel_Order]_{class}_Caudoviricetes	[Novel_Family]_{class}_Caudoviricetes	[Novel_Genus]_{class}_Caudoviricetes	Viruses	0.993	dsDNAphage	1	4	classified	VC75193	FALSE	TRUE	virulent
SRR19631113	contig057295	contig057295	Duplodnaviria	Heunggongvirae	Uroviricota	Caudoviricetes	[Novel_Order]_{class}_Caudoviricetes	[Novel_Family]_{class}_Caudoviricetes	[Novel_Genus]_{class}_Caudoviricetes	Viruses	1	dsDNAphage	1	2	classified	VC73781	FALSE	TRUE	virulent
SRR19631113	contig057299	contig057423	Duplodnaviria	Heunggongvirae	Uroviricota	Caudoviricetes	[Novel_Order]_{class}_Caudoviricetes	[Novel_Family]_{class}_Caudoviricetes	[Novel_Genus]_{class}_Caudoviricetes	Viruses	0.993	dsDNAphage	1	1	classified	VC34819	FALSE	TRUE	virulent
SRR19631114	contig057350	contig057350	Duplodnaviria	Heunggongvirae	Uroviricota	Caudoviricetes	[Unclassified_Order]_{genus}_Jilinvirus	[Unclassified_Family]_{genus}_Jilinvirus	Jilinvirus	Viruses	0.993	dsDNAphage	1	1	classified	VC58702	TRUE	FALSE	virulent
SRR19631114	contig057448	contig057448	Duplodnaviria	Heunggongvirae	Uroviricota	Caudoviricetes	[Unclassified_Order]_{family}_Autographiviridae	Autographiviridae	Drulisvirus	Viruses	1	dsDNAphage	1	1	classified	VC67435	TRUE	FALSE	virulent
SRR19631123	contig057483	contig057483	Duplodnaviria	Heunggongvirae	Uroviricota	Caudoviricetes	[Novel_Order]_{class}_Caudoviricetes	[Novel_Family]_{class}_Caudoviricetes	[Novel_Genus]_{class}_Caudoviricetes	Viruses	1	dsDNAphage	1	3	classified	VC74815	FALSE	TRUE	virulent
SRR19631130	contig057679	contig058817	Duplodnaviria	Heunggongvirae	Uroviricota	Caudoviricetes	[Novel_Order]_{class}_Caudoviricetes	[Novel_Family]_{class}_Caudoviricetes	[Novel_Genus]_{class}_Caudoviricetes	Viruses	1	dsDNAphage	1	4	classified	VC75211	FALSE	TRUE	virulent
SRR19631130	contig057779	contig057779	Duplodnaviria	Heunggongvirae	Uroviricota	Caudoviricetes	[Novel_Order]_{class}_Caudoviricetes	[Novel_Family]_{class}_Caudoviricetes	[Novel_Genus]_{class}_Caudoviricetes	Viruses	0.98	dsDNAphage	1	2	classified	VC72447	FALSE	TRUE	temperate
SRR19631130	contig057829	contig057829	Duplodnaviria	Heunggongvirae	Uroviricota	Caudoviricetes	[Unclassified_Order]_{family}_Autographiviridae	Autographiviridae	Drulisvirus	Viruses	1	dsDNAphage	1	1	classified	VC67435	TRUE	FALSE	virulent
SRR19631130	contig057834	contig057834	Duplodnaviria	Heunggongvirae	Uroviricota	Caudoviricetes	[Novel_Order]_{class}_Caudoviricetes	[Novel_Family]_{class}_Caudoviricetes	[Novel_Genus]_{class}_Caudoviricetes	Viruses	1	dsDNAphage	1	1	classified	VC18166	FALSE	TRUE	temperate
SRR19631131	contig058010	contig058010	Duplodnaviria	Heunggongvirae	Uroviricota	Caudoviricetes	[Novel_Order]_{class}_Caudoviricetes	[Novel_Family]_{class}_Caudoviricetes	[Novel_Genus]_{class}_Caudoviricetes	Viruses	1	dsDNAphage	1	1	classified	VC13197	FALSE	TRUE	temperate
SRR19631131	contig058032	contig058032	Duplodnaviria	Heunggongvirae	Uroviricota	Caudoviricetes	[Novel_Order]_{class}_Caudoviricetes	[Novel_Family]_{class}_Caudoviricetes	[Novel_Genus]_{class}_Caudoviricetes	Viruses	1	dsDNAphage	1	1	classified	VC49281	FALSE	TRUE	temperate
SRR19631131	contig058091	contig058091	Duplodnaviria	Heunggongvirae	Uroviricota	Caudoviricetes	[Novel_Order]_{class}_Caudoviricetes	[Novel_Family]_{class}_Caudoviricetes	[Novel_Genus]_{class}_Caudoviricetes	Viruses	1	dsDNAphage	1	1	classified	VC53259	FALSE	TRUE	virulent
SRR19631132	contig058139	contig058139	Duplodnaviria	Heunggongvirae	Uroviricota	Caudoviricetes	[Novel_Order]_{class}_Caudoviricetes	[Novel_Family]_{class}_Caudoviricetes	[Novel_Genus]_{class}_Caudoviricetes	Viruses	1	dsDNAphage	1	1	classified	VC06463	FALSE	TRUE	virulent
SRR19631132	contig058192	contig058192	Duplodnaviria	Heunggongvirae	Uroviricota	Caudoviricetes	[Novel_Order]_{class}_Caudoviricetes	[Novel_Family]_{class}_Caudoviricetes	[Novel_Genus]_{class}_Caudoviricetes	Viruses	1	dsDNAphage	1	2	classified	VC72193	FALSE	TRUE	temperate
SRR19631132	contig058195	contig058195	Duplodnaviria	Heunggongvirae	Uroviricota	Caudoviricetes	[Novel_Order]_{class}_Caudoviricetes	[Novel_Family]_{class}_Caudoviricetes	[Novel_Genus]_{class}_Caudoviricetes	Viruses	0.987	dsDNAphage	1	1	classified	VC40071	FALSE	TRUE	virulent
SRR19631140	contig058327	contig058327	Duplodnaviria	Heunggongvirae	Uroviricota	Caudoviricetes	[Novel_Order]_{class}_Caudoviricetes	[Novel_Family]_{class}_Caudoviricetes	[Novel_Genus]_{class}_Caudoviricetes	Viruses	0.98	dsDNAphage	1	2	classified	VC01853	FALSE	TRUE	temperate
SRR19631140	contig058359	contig058359	Duplodnaviria	Heunggongvirae	Uroviricota	Caudoviricetes	[Novel_Order]_{class}_Caudoviricetes	[Novel_Family]_{class}_Caudoviricetes	[Novel_Genus]_{class}_Caudoviricetes	Viruses	1	dsDNAphage	1	1	classified	VC73797	TRUE	FALSE	virulent
SRR19631140	contig058500	contig058500	Duplodnaviria	Heunggongvirae	Uroviricota	Caudoviricetes	[Novel_Order]_{class}_Caudoviricetes	[Novel_Family]_{class}_Caudoviricetes	[Novel_Genus]_{class}_Caudoviricetes	Viruses	0.98	dsDNAphage	1	1	classified	VC74756	FALSE	TRUE	virulent
SRR19631140	contig058501	contig058501	Duplodnaviria	Heunggongvirae	Uroviricota	Caudoviricetes	[Novel_Order]_{class}_Caudoviricetes	[Novel_Family]_{class}_Caudoviricetes	[Novel_Genus]_{class}_Caudoviricetes	Viruses	1	dsDNAphage	1	1	classified	VC49635	FALSE	TRUE	virulent
SRR19631141	contig058606	contig058442	Duplodnaviria	Heunggongvirae	Uroviricota	Caudoviricetes	[Novel_Order]_{class}_Caudoviricetes	[Novel_Family]_{class}_Caudoviricetes	[Novel_Genus]_{class}_Caudoviricetes	Viruses	1	dsDNAphage	1	4	classified	VC75208	FALSE	TRUE	virulent
SRR19631151	contig058895	contig058895	Duplodnaviria	Heunggongvirae	Uroviricota	Caudoviricetes	[Unclassified_Order]_{family}_Drexlerviridae	Drexlerviridae	[Novel_Genus]_{family}_Drexlerviridae	Viruses	1	dsDNAphage	1	1	classified	VC71869	TRUE	FALSE	virulent
SRR19631151	contig058908	contig058908	Duplodnaviria	Heunggongvirae	Uroviricota	Caudoviricetes	[Novel_Order]_{class}_Caudoviricetes	[Novel_Family]_{class}_Caudoviricetes	[Novel_Genus]_{class}_Caudoviricetes	Viruses	1	dsDNAphage	1	2	classified	VC40281	TRUE	FALSE	virulent
SRR19631151	contig058996	contig058996	Duplodnaviria	Heunggongvirae	Uroviricota	Caudoviricetes	[Novel_Order]_{class}_Caudoviricetes	[Novel_Family]_{class}_Caudoviricetes	[Novel_Genus]_{class}_Caudoviricetes	Viruses	1	dsDNAphage	1	1	classified	VC52380	FALSE	TRUE	virulent
SRR19631151	contig059020	contig059020	Duplodnaviria	Heunggongvirae	Uroviricota	Caudoviricetes	[Novel_Order]_{class}_Caudoviricetes	[Novel_Family]_{class}_Caudoviricetes	[Novel_Genus]_{class}_Caudoviricetes	Viruses	0.993	dsDNAphage	1	1	classified	VC50168	FALSE	TRUE	temperate
SRR19631151	contig059023	contig059023	Duplodnaviria	Heunggongvirae	Uroviricota	Caudoviricetes	[Unclassified_Order]_{family}_Schitoviridae	Schitoviridae	Gamaleyavirus	Viruses	1	dsDNAphage	1	1	classified	VC67095	TRUE	FALSE	virulent
SRR19631151	contig059032	contig059032	Duplodnaviria	Heunggongvirae	Uroviricota	Caudoviricetes	[Novel_Order]_{class}_Caudoviricetes	[Novel_Family]_{class}_Caudoviricetes	[Novel_Genus]_{class}_Caudoviricetes	Viruses	1	dsDNAphage	1	1	classified	VC38770	FALSE	TRUE	temperate
SRR19631151	contig059070	contig059070	Duplodnaviria	Heunggongvirae	Uroviricota	Caudoviricetes	[Unclassified_Order]_{family}_Drexlerviridae	Drexlerviridae	[Novel_Genus]_{family}_Drexlerviridae	Viruses	1	dsDNAphage	1	1	classified	VC71872	TRUE	FALSE	virulent
SRR19631151	contig059082	contig059082	Duplodnaviria	Heunggongvirae	Uroviricota	Caudoviricetes	[Novel_Order]_{class}_Caudoviricetes	[Novel_Family]_{class}_Caudoviricetes	[Novel_Genus]_{class}_Caudoviricetes	Viruses	1	dsDNAphage	1	2	classified	VC70762	FALSE	TRUE	virulent
SRR19631152	contig059117	contig059117	Duplodnaviria	Heunggongvirae	Uroviricota	Caudoviricetes	[Unclassified_Order]_{family}_Autographiviridae	Autographiviridae	Kayfunavirus	Viruses	1	dsDNAphage	1	1	classified	VC67460	TRUE	FALSE	virulent
SRR19631152	contig059118	contig059118	Duplodnaviria	Heunggongvirae	Uroviricota	Caudoviricetes	[Unclassified_Order]_{genus}_Kuravirus	[Unclassified_Family]_{genus}_Kuravirus	Kuravirus	Viruses	1	dsDNAphage	1	1	classified	VC74389	TRUE	FALSE	virulent
SRR19631151	contig059166	contig059166	Duplodnaviria	Heunggongvirae	Uroviricota	Caudoviricetes	[Novel_Order]_{class}_Caudoviricetes	[Novel_Family]_{class}_Caudoviricetes	[Novel_Genus]_{class}_Caudoviricetes	Viruses	1	dsDNAphage	1	3	classified	VC49635	FALSE	TRUE	virulent
SRR19631151	contig059185	contig059185	Duplodnaviria	Heunggongvirae	Uroviricota	Caudoviricetes	[Novel_Order]_{class}_Caudoviricetes	[Novel_Family]_{class}_Caudoviricetes	[Novel_Genus]_{class}_Caudoviricetes	Viruses	1	dsDNAphage	1	1	classified	VC52822	FALSE	TRUE	virulent
SRR19631151	contig059187	contig059187	Duplodnaviria	Heunggongvirae	Uroviricota	Caudoviricetes	[Novel_Order]_{class}_Caudoviricetes	[Novel_Family]_{class}_Caudoviricetes	[Novel_Genus]_{class}_Caudoviricetes	Viruses	1	dsDNAphage	1	1	classified	VC20005	FALSE	TRUE	virulent
SRR19631151	contig059188	contig059188	Duplodnaviria	Heunggongvirae	Uroviricota	Caudoviricetes	[Unclassified_Order]_{family}_Autographiviridae	Autographiviridae	[Novel_Genus]_{family}_Autographiviridae	Viruses	0.987	dsDNAphage	1	1	classified	VC67445	FALSE	TRUE	virulent
SRR19631152	contig059213	contig059213	Duplodnaviria	Heunggongvirae	Uroviricota	Caudoviricetes	[Novel_Order]_{class}_Caudoviricetes	[Novel_Family]_{class}_Caudoviricetes	[Novel_Genus]_{class}_Caudoviricetes	Viruses	1	dsDNAphage	1	1	classified	VC55559	FALSE	TRUE	virulent
SRR19631153	contig059372	contig138136	Duplodnaviria	Heunggongvirae	Uroviricota	Caudoviricetes	[Novel_Order]_{class}_Caudoviricetes	[Novel_Family]_{class}_Caudoviricetes	[Novel_Genus]_{class}_Caudoviricetes	Viruses	0.993	dsDNAphage	1	1	classified	VC50510	FALSE	TRUE	temperate
SRR19631153	contig059413	contig059413	Duplodnaviria	Heunggongvirae	Uroviricota	Caudoviricetes	[Unclassified_Order]_{family}_Drexlerviridae	Drexlerviridae	[Novel_Genus]_{family}_Drexlerviridae	Viruses	1	dsDNAphage	1	2	classified	VC71869	TRUE	FALSE	virulent
SRR19631153	contig059430	contig059430	Duplodnaviria	Heunggongvirae	Uroviricota	Caudoviricetes	[Unclassified_Order]_{family}_Autographiviridae	Autographiviridae	Kayfunavirus	Viruses	0.993	dsDNAphage	1	2	classified	VC67460	TRUE	FALSE	virulent
SRR19631153	contig059498	contig059498	Duplodnaviria	Heunggongvirae	Uroviricota	Caudoviricetes	[Novel_Order]_{class}_Caudoviricetes	[Novel_Family]_{class}_Caudoviricetes	[Novel_Genus]_{class}_Caudoviricetes	Viruses	1	dsDNAphage	1	2	classified	VC40795	FALSE	TRUE	virulent
SRR19631153	contig059511	contig059511	Duplodnaviria	Heunggongvirae	Uroviricota	Caudoviricetes	[Novel_Order]_{class}_Caudoviricetes	[Novel_Family]_{class}_Caudoviricetes	[Novel_Genus]_{class}_Caudoviricetes	Viruses	1	dsDNAphage	1	1	classified	VC37722	FALSE	TRUE	temperate
SRR19631153	contig059513	contig059513	Duplodnaviria	Heunggongvirae	Uroviricota	Caudoviricetes	[Novel_Order]_{class}_Caudoviricetes	[Novel_Family]_{class}_Caudoviricetes	[Novel_Genus]_{class}_Caudoviricetes	Viruses	0.993	dsDNAphage	1	1	classified	VC01900	FALSE	TRUE	temperate
SRR19631153	contig059529	contig059529	Duplodnaviria	Heunggongvirae	Uroviricota	Caudoviricetes	[Novel_Order]_{class}_Caudoviricetes	[Novel_Family]_{class}_Caudoviricetes	[Novel_Genus]_{class}_Caudoviricetes	Viruses	1	dsDNAphage	1	3	classified	VC76334	FALSE	TRUE	virulent
SRR19631153	contig059626	contig059626	Duplodnaviria	Heunggongvirae	Uroviricota	Caudoviricetes	[Novel_Order]_{class}_Caudoviricetes	[Novel_Family]_{class}_Caudoviricetes	[Novel_Genus]_{class}_Caudoviricetes	Viruses	1	dsDNAphage	1	1	classified	VC27514	FALSE	TRUE	virulent
SRR19631153	contig059630	contig059630	Duplodnaviria	Heunggongvirae	Uroviricota	Caudoviricetes	[Novel_Order]_{class}_Caudoviricetes	[Novel_Family]_{class}_Caudoviricetes	[Novel_Genus]_{class}_Caudoviricetes	Viruses	1	dsDNAphage	1	1	classified	VC51372	FALSE	TRUE	virulent
SRR19631155	contig059694	contig059694	Duplodnaviria	Heunggongvirae	Uroviricota	Caudoviricetes	[Novel_Order]_{class}_Caudoviricetes	[Novel_Family]_{class}_Caudoviricetes	[Novel_Genus]_{class}_Caudoviricetes	Viruses	1	dsDNAphage	1	1	classified	VC67204	FALSE	TRUE	virulent
SRR19631155	contig059698	contig059698	Duplodnaviria	Heunggongvirae	Uroviricota	Caudoviricetes	[Novel_Order]_{class}_Caudoviricetes	[Novel_Family]_{class}_Caudoviricetes	[Novel_Genus]_{class}_Caudoviricetes	Viruses	0.98	dsDNAphage	1	1	classified	VC11750	FALSE	TRUE	temperate
SRR19631155	contig059701	contig059701	Duplodnaviria	Heunggongvirae	Uroviricota	Caudoviricetes	[Novel_Order]_{class}_Caudoviricetes	[Novel_Family]_{class}_Caudoviricetes	[Novel_Genus]_{class}_Caudoviricetes	Viruses	1	dsDNAphage	1	1	classified	VC45623	FALSE	TRUE	virulent
SRR19631155	contig059723	contig171920	Duplodnaviria	Heunggongvirae	Uroviricota	Caudoviricetes	[Novel_Order]_{class}_Caudoviricetes	[Novel_Family]_{class}_Caudoviricetes	[Novel_Genus]_{class}_Caudoviricetes	Viruses	1	dsDNAphage	1	1	classified	VC15733	FALSE	TRUE	virulent
SRR19631161	contig059767	contig060619	Duplodnaviria	Heunggongvirae	Uroviricota	Caudoviricetes	[Unclassified_Order]_{family}_Schitoviridae	Schitoviridae	[Novel_Genus]_{family}_Schitoviridae	Viruses	1	dsDNAphage	1	2	classified	VC67234	FALSE	TRUE	virulent
SRR19631161	contig059781	contig059781	Duplodnaviria	Heunggongvirae	Uroviricota	Caudoviricetes	[Novel_Order]_{class}_Caudoviricetes	[Novel_Family]_{class}_Caudoviricetes	[Novel_Genus]_{class}_Caudoviricetes	Viruses	1	dsDNAphage	1	1	classified	VC72233	TRUE	FALSE	virulent
SRR19631161	contig059826	contig059826	Duplodnaviria	Heunggongvirae	Uroviricota	Caudoviricetes	[Novel_Order]_{class}_Caudoviricetes	[Novel_Family]_{class}_Caudoviricetes	[Novel_Genus]_{class}_Caudoviricetes	Viruses	1	dsDNAphage	1	1	classified	VC76837	FALSE	TRUE	virulent
SRR19631161	contig059838	contig059838	Duplodnaviria	Heunggongvirae	Uroviricota	Caudoviricetes	[Unclassified_Order]_{family}_Rountreeviridae	Rountreeviridae	[Novel_Genus]_{family}_Rountreeviridae	Viruses	0.993	dsDNAphage	1	3	classified	VC74771	FALSE	TRUE	virulent
SRR19631161	contig059855	contig060597	Duplodnaviria	Heunggongvirae	Uroviricota	Caudoviricetes	[Novel_Order]_{class}_Caudoviricetes	[Novel_Family]_{class}_Caudoviricetes	[Novel_Genus]_{class}_Caudoviricetes	Viruses	0.993	dsDNAphage	1	4	classified	VC75215	FALSE	TRUE	virulent
SRR19631161	contig059861	contig060414	Duplodnaviria	Heunggongvirae	Uroviricota	Caudoviricetes	[Novel_Order]_{class}_Caudoviricetes	[Novel_Family]_{class}_Caudoviricetes	[Novel_Genus]_{class}_Caudoviricetes	Viruses	0.993	dsDNAphage	1	1	classified	VC17910	FALSE	TRUE	virulent
SRR19631161	contig060028	contig060028	Duplodnaviria	Heunggongvirae	Uroviricota	Caudoviricetes	[Novel_Order]_{class}_Caudoviricetes	[Novel_Family]_{class}_Caudoviricetes	[Novel_Genus]_{class}_Caudoviricetes	Viruses	0.98	dsDNAphage	1	1	classified	VC69424	FALSE	TRUE	temperate
SRR19631161	contig060030	contig060030	Duplodnaviria	Heunggongvirae	Uroviricota	Caudoviricetes	[Novel_Order]_{class}_Caudoviricetes	[Novel_Family]_{class}_Caudoviricetes	[Novel_Genus]_{class}_Caudoviricetes	Viruses	1	dsDNAphage	1	1	classified	VC34818	FALSE	TRUE	virulent
SRR19631161	contig060031	contig060031	Duplodnaviria	Heunggongvirae	Uroviricota	Caudoviricetes	[Unclassified_Order]_{family}_Autographiviridae	Autographiviridae	[Novel_Genus]_{family}_Autographiviridae	Viruses	0.993	dsDNAphage	1	1	classified	VC67568	TRUE	FALSE	virulent
SRR19631162	contig060192	contig060192	Duplodnaviria	Heunggongvirae	Uroviricota	Caudoviricetes	[Unclassified_Order]_{family}_Autographiviridae	Autographiviridae	[Novel_Genus]_{family}_Autographiviridae	Viruses	0.993	dsDNAphage	1	1	classified	VC67413	FALSE	TRUE	virulent
SRR19631162	contig060239	contig060239	Duplodnaviria	Heunggongvirae	Uroviricota	Caudoviricetes	[Novel_Order]_{class}_Caudoviricetes	[Novel_Family]_{class}_Caudoviricetes	[Novel_Genus]_{class}_Caudoviricetes	Viruses	1	dsDNAphage	1	1	classified	VC40863	FALSE	TRUE	temperate
SRR19631162	contig060273	contig060273	Duplodnaviria	Heunggongvirae	Uroviricota	Caudoviricetes	[Unclassified_Order]_{family}_Rountreeviridae	Rountreeviridae	Minhovirus	Viruses	1	dsDNAphage	1	2	classified	VC74788	TRUE	FALSE	virulent
SRR19631163	contig060307	contig060307	Duplodnaviria	Heunggongvirae	Uroviricota	Caudoviricetes	[Novel_Order]_{class}_Caudoviricetes	[Novel_Family]_{class}_Caudoviricetes	[Novel_Genus]_{class}_Caudoviricetes	Viruses	1	dsDNAphage	1	1	classified	VC40276	FALSE	TRUE	virulent
SRR19631163	contig060309	contig060309	Duplodnaviria	Heunggongvirae	Uroviricota	Caudoviricetes	[Unclassified_Order]_{family}_Peduoviridae	Peduoviridae	[Novel_Genus]_{family}_Peduoviridae	Viruses	0.907	dsDNAphage	1	4	classified	VC58647	FALSE	TRUE	temperate
SRR19631163	contig060523	contig060523	Duplodnaviria	Heunggongvirae	Uroviricota	Caudoviricetes	[Novel_Order]_{class}_Caudoviricetes	[Novel_Family]_{class}_Caudoviricetes	[Novel_Genus]_{class}_Caudoviricetes	Viruses	1	dsDNAphage	1	1	classified	VC71595	FALSE	TRUE	virulent
SRR19631163	contig060541	contig060541	Duplodnaviria	Heunggongvirae	Uroviricota	Caudoviricetes	[Novel_Order]_{class}_Caudoviricetes	[Novel_Family]_{class}_Caudoviricetes	[Novel_Genus]_{class}_Caudoviricetes	Viruses	1	dsDNAphage	1	3	classified	VC74868	FALSE	TRUE	virulent
SRR19631163	contig060568	contig060568	Duplodnaviria	Heunggongvirae	Uroviricota	Caudoviricetes	[Novel_Order]_{class}_Caudoviricetes	[Novel_Family]_{class}_Caudoviricetes	[Novel_Genus]_{class}_Caudoviricetes	Viruses	1	dsDNAphage	1	3	classified	VC73802	TRUE	FALSE	virulent
SRR19631164	contig060627	contig060627	Duplodnaviria	Heunggongvirae	Uroviricota	Caudoviricetes	[Novel_Order]_{class}_Caudoviricetes	[Novel_Family]_{class}_Caudoviricetes	[Novel_Genus]_{class}_Caudoviricetes	Viruses	1	dsDNAphage	1	2	classified	VC70763	FALSE	TRUE	virulent
SRR19631164	contig060644	contig060644	Duplodnaviria	Heunggongvirae	Uroviricota	Caudoviricetes	[Novel_Order]_{class}_Caudoviricetes	[Novel_Family]_{class}_Caudoviricetes	[Novel_Genus]_{class}_Caudoviricetes	Viruses	1	dsDNAphage	1	1	classified	VC74115	FALSE	TRUE	virulent
SRR19631164	contig060867	contig060867	Duplodnaviria	Heunggongvirae	Uroviricota	Caudoviricetes	[Unclassified_Order]_{family}_Drexlerviridae	Drexlerviridae	[Novel_Genus]_{family}_Drexlerviridae	Viruses	1	dsDNAphage	1	1	classified	VC71872	TRUE	FALSE	virulent
SRR19631164	contig060949	contig060949	Duplodnaviria	Heunggongvirae	Uroviricota	Caudoviricetes	[Novel_Order]_{class}_Caudoviricetes	[Novel_Family]_{class}_Caudoviricetes	[Novel_Genus]_{class}_Caudoviricetes	Viruses	1	dsDNAphage	1	1	classified	VC00446	FALSE	TRUE	virulent
SRR19631164	contig060951	contig060951	Duplodnaviria	Heunggongvirae	Uroviricota	Caudoviricetes	[Novel_Order]_{class}_Caudoviricetes	[Novel_Family]_{class}_Caudoviricetes	[Novel_Genus]_{class}_Caudoviricetes	Viruses	1	dsDNAphage	1	1	classified	VC44107	FALSE	TRUE	virulent
SRR19631164	contig060953	contig060953	Duplodnaviria	Heunggongvirae	Uroviricota	Caudoviricetes	[Novel_Order]_{class}_Caudoviricetes	[Novel_Family]_{class}_Caudoviricetes	[Novel_Genus]_{class}_Caudoviricetes	Viruses	0.993	dsDNAphage	1	1	classified	VC68600	FALSE	TRUE	virulent
SRR19631165	contig060970	contig060970	Duplodnaviria	Heunggongvirae	Uroviricota	Caudoviricetes	[Novel_Order]_{class}_Caudoviricetes	[Novel_Family]_{class}_Caudoviricetes	[Novel_Genus]_{class}_Caudoviricetes	Viruses	1	dsDNAphage	1	1	classified	VC73407	FALSE	TRUE	virulent
SRR19631164	contig060994	contig060994	Duplodnaviria	Heunggongvirae	Uroviricota	Caudoviricetes	[Novel_Order]_{class}_Caudoviricetes	[Novel_Family]_{class}_Caudoviricetes	[Novel_Genus]_{class}_Caudoviricetes	Viruses	0.993	dsDNAphage	1	1	classified	VC62005	TRUE	FALSE	virulent
SRR19631164	contig060995	contig060995	Duplodnaviria	Heunggongvirae	Uroviricota	Caudoviricetes	[Novel_Order]_{class}_Caudoviricetes	[Novel_Family]_{class}_Caudoviricetes	[Novel_Genus]_{class}_Caudoviricetes	Viruses	1	dsDNAphage	1	1	classified	VC76871	FALSE	TRUE	virulent
SRR19631165	contig061106	contig061106	Duplodnaviria	Heunggongvirae	Uroviricota	Caudoviricetes	[Novel_Order]_{class}_Caudoviricetes	[Novel_Family]_{class}_Caudoviricetes	[Novel_Genus]_{class}_Caudoviricetes	Viruses	0.993	dsDNAphage	1	1	classified	VC67199	FALSE	TRUE	virulent
SRR19631165	contig061158	contig061158	Duplodnaviria	Heunggongvirae	Uroviricota	Caudoviricetes	[Novel_Order]_{class}_Caudoviricetes	[Novel_Family]_{class}_Caudoviricetes	[Novel_Genus]_{class}_Caudoviricetes	Viruses	1	dsDNAphage	1	2	classified	VC74115	FALSE	TRUE	virulent
SRR19631165	contig061169	contig061169	Duplodnaviria	Heunggongvirae	Uroviricota	Caudoviricetes	[Novel_Order]_{class}_Caudoviricetes	[Novel_Family]_{class}_Caudoviricetes	[Novel_Genus]_{class}_Caudoviricetes	Viruses	0.993	dsDNAphage	1	4	classified	VC06463	FALSE	TRUE	virulent
SRR19631165	contig061251	contig061251	Duplodnaviria	Heunggongvirae	Uroviricota	Caudoviricetes	[Novel_Order]_{class}_Caudoviricetes	[Novel_Family]_{class}_Caudoviricetes	[Novel_Genus]_{class}_Caudoviricetes	Viruses	1	dsDNAphage	1	1	classified	VC72343	FALSE	TRUE	virulent
SRR19631165	contig061283	contig061283	Duplodnaviria	Heunggongvirae	Uroviricota	Caudoviricetes	[Unclassified_Order]_{family}_Autographiviridae	Autographiviridae	[Novel_Genus]_{family}_Autographiviridae	Viruses	0.993	dsDNAphage	1	2	classified	VC67380	FALSE	TRUE	virulent
SRR19631165	contig061286	contig061286	Duplodnaviria	Heunggongvirae	Uroviricota	Caudoviricetes	[Novel_Order]_{class}_Caudoviricetes	[Novel_Family]_{class}_Caudoviricetes	[Novel_Genus]_{class}_Caudoviricetes	Viruses	0.987	dsDNAphage	1	2	classified	VC58695	FALSE	TRUE	temperate
SRR19631165	contig061318	contig061318	Duplodnaviria	Heunggongvirae	Uroviricota	Caudoviricetes	[Novel_Order]_{class}_Caudoviricetes	[Novel_Family]_{class}_Caudoviricetes	[Novel_Genus]_{class}_Caudoviricetes	Viruses	0.993	dsDNAphage	1	1	classified	VC40915	FALSE	TRUE	temperate
SRR19631166	contig061320	contig061320	Duplodnaviria	Heunggongvirae	Uroviricota	Caudoviricetes	[Novel_Order]_{class}_Caudoviricetes	[Novel_Family]_{class}_Caudoviricetes	[Novel_Genus]_{class}_Caudoviricetes	Viruses	1	dsDNAphage	1	1	classified	VC39220	FALSE	TRUE	virulent
SRR19631166	contig061352	contig254540	Duplodnaviria	Heunggongvirae	Uroviricota	Caudoviricetes	[Novel_Order]_{class}_Caudoviricetes	[Novel_Family]_{class}_Caudoviricetes	[Novel_Genus]_{class}_Caudoviricetes	Viruses	0.993	dsDNAphage	1	1	classified	VC53511	FALSE	TRUE	temperate
SRR19631166	contig061378	contig061378	Duplodnaviria	Heunggongvirae	Uroviricota	Caudoviricetes	[Novel_Order]_{class}_Caudoviricetes	[Novel_Family]_{class}_Caudoviricetes	[Novel_Genus]_{class}_Caudoviricetes	Viruses	1	dsDNAphage	1	4	classified	VC75351	FALSE	TRUE	virulent
SRR19631166	contig061383	contig061383	Duplodnaviria	Heunggongvirae	Uroviricota	Caudoviricetes	[Novel_Order]_{class}_Caudoviricetes	[Novel_Family]_{class}_Caudoviricetes	[Novel_Genus]_{class}_Caudoviricetes	Viruses	1	dsDNAphage	1	4	classified	VC75322	FALSE	TRUE	virulent
SRR19631167	contig061412	contig061412	Duplodnaviria	Heunggongvirae	Uroviricota	Caudoviricetes	[Novel_Order]_{class}_Caudoviricetes	[Novel_Family]_{class}_Caudoviricetes	[Novel_Genus]_{class}_Caudoviricetes	Viruses	1	dsDNAphage	1	4	classified	VC75220	FALSE	TRUE	virulent
SRR19939423	contig061584	contig061584	Duplodnaviria	Heunggongvirae	Uroviricota	Caudoviricetes	[Novel_Order]_{class}_Caudoviricetes	[Novel_Family]_{class}_Caudoviricetes	[Novel_Genus]_{class}_Caudoviricetes	Viruses	1	dsDNAphage	1	4	classified	VC56731	FALSE	TRUE	virulent
SRR19939423	contig061590	contig061590	Duplodnaviria	Heunggongvirae	Uroviricota	Caudoviricetes	[Novel_Order]_{class}_Caudoviricetes	[Novel_Family]_{class}_Caudoviricetes	[Novel_Genus]_{class}_Caudoviricetes	Viruses	0.993	dsDNAphage	1	4	classified	VC25130	FALSE	TRUE	virulent
SRR19939423	contig061611	contig061611	Duplodnaviria	Heunggongvirae	Uroviricota	Caudoviricetes	[Novel_Order]_{class}_Caudoviricetes	[Novel_Family]_{class}_Caudoviricetes	[Novel_Genus]_{class}_Caudoviricetes	Viruses	1	dsDNAphage	1	1	classified	VC48534	FALSE	TRUE	temperate
SRR19939423	contig061671	contig061671	Monodnaviria	Sangervirae	Phixviricota	Malgrandaviricetes	Petitvirales	Microviridae	[Novel_Genus]_{family}_Microviridae	Viruses	0.987	dsDNAphage	1	4	unclassified	VC77626	FALSE	FALSE	virulent
SRR19939423	contig061690	contig061690	Duplodnaviria	Heunggongvirae	Uroviricota	Caudoviricetes	[Novel_Order]_{class}_Caudoviricetes	[Novel_Family]_{class}_Caudoviricetes	[Novel_Genus]_{class}_Caudoviricetes	Viruses	1	dsDNAphage	1	3	classified	VC31599	FALSE	TRUE	temperate
SRR19939423	contig061706	contig061706	Duplodnaviria	Heunggongvirae	Uroviricota	Caudoviricetes	[Novel_Order]_{class}_Caudoviricetes	[Novel_Family]_{class}_Caudoviricetes	[Novel_Genus]_{class}_Caudoviricetes	Viruses	1	dsDNAphage	1	3	classified	VC23915	FALSE	TRUE	virulent
SRR19939423	contig061755	contig061755	Duplodnaviria	Heunggongvirae	Uroviricota	Caudoviricetes	[Novel_Order]_{class}_Caudoviricetes	[Novel_Family]_{class}_Caudoviricetes	[Novel_Genus]_{class}_Caudoviricetes	Viruses	1	dsDNAphage	1	1	classified	VC62448	FALSE	TRUE	temperate
SRR19939423	contig061821	contig061821	Duplodnaviria	Heunggongvirae	Uroviricota	Caudoviricetes	[Novel_Order]_{class}_Caudoviricetes	[Novel_Family]_{class}_Caudoviricetes	[Novel_Genus]_{class}_Caudoviricetes	Viruses	1	dsDNAphage	1	4	classified	VC75423	FALSE	TRUE	virulent
SRR19939423	contig061851	contig061851	Duplodnaviria	Heunggongvirae	Uroviricota	Caudoviricetes	[Novel_Order]_{class}_Caudoviricetes	[Novel_Family]_{class}_Caudoviricetes	[Novel_Genus]_{class}_Caudoviricetes	Viruses	0.993	dsDNAphage	1	1	classified	VC33509	FALSE	TRUE	virulent
SRR19939423	contig061858	contig061858	Duplodnaviria	Heunggongvirae	Uroviricota	Caudoviricetes	[Novel_Order]_{class}_Caudoviricetes	[Novel_Family]_{class}_Caudoviricetes	[Novel_Genus]_{class}_Caudoviricetes	Viruses	0.987	dsDNAphage	1	1	classified	VC25928	FALSE	TRUE	virulent
SRR19939425	contig062008	contig062008	Duplodnaviria	Heunggongvirae	Uroviricota	Caudoviricetes	Crassvirales	Steigviridae	[Novel_Genus]_{family}_Steigviridae	Viruses	0.993	dsDNAphage	1	1	classified	VC00159	FALSE	TRUE	virulent
SRR19939425	contig062027	contig062027	Duplodnaviria	Heunggongvirae	Uroviricota	Caudoviricetes	[Novel_Order]_{class}_Caudoviricetes	[Novel_Family]_{class}_Caudoviricetes	[Novel_Genus]_{class}_Caudoviricetes	Viruses	1	dsDNAphage	1	4	classified	VC64261	FALSE	TRUE	virulent
SRR19939425	contig062187	contig062187	Monodnaviria	Sangervirae	Phixviricota	Malgrandaviricetes	Petitvirales	Microviridae	[Novel_Genus]_{family}_Microviridae	Viruses	0.987	dsDNAphage	1	1	unclassified	VC77627	FALSE	FALSE	virulent
SRR19939425	contig062207	contig062207	Monodnaviria	Sangervirae	Phixviricota	Malgrandaviricetes	Petitvirales	Microviridae	[Novel_Genus]_{family}_Microviridae	Viruses	1	dsDNAphage	1	1	classified	VC02449	FALSE	TRUE	virulent
SRR19939426	contig062278	contig062278	Duplodnaviria	Heunggongvirae	Uroviricota	Caudoviricetes	[Novel_Order]_{class}_Caudoviricetes	[Novel_Family]_{class}_Caudoviricetes	[Novel_Genus]_{class}_Caudoviricetes	Viruses	0.993	dsDNAphage	1	2	classified	VC35201	FALSE	TRUE	virulent
SRR19939426	contig062337	contig062337	Duplodnaviria	Heunggongvirae	Uroviricota	Caudoviricetes	[Novel_Order]_{class}_Caudoviricetes	[Novel_Family]_{class}_Caudoviricetes	[Novel_Genus]_{class}_Caudoviricetes	Viruses	0.98	dsDNAphage	1	3	classified	VC20584	FALSE	TRUE	virulent
SRR19939426	contig062423	contig062423	Duplodnaviria	Heunggongvirae	Uroviricota	Caudoviricetes	[Novel_Order]_{class}_Caudoviricetes	[Novel_Family]_{class}_Caudoviricetes	[Novel_Genus]_{class}_Caudoviricetes	Viruses	1	dsDNAphage	1	1	classified	VC48297	FALSE	TRUE	temperate
SRR19939427	contig062507	contig138227	Duplodnaviria	Heunggongvirae	Uroviricota	Caudoviricetes	[Novel_Order]_{class}_Caudoviricetes	[Novel_Family]_{class}_Caudoviricetes	[Novel_Genus]_{class}_Caudoviricetes	Viruses	0.973	dsDNAphage	1	4	classified	VC31574	FALSE	TRUE	virulent
SRR19939428	contig062869	contig062869	Duplodnaviria	Heunggongvirae	Uroviricota	Caudoviricetes	[Novel_Order]_{class}_Caudoviricetes	[Novel_Family]_{class}_Caudoviricetes	[Novel_Genus]_{class}_Caudoviricetes	Viruses	0.987	dsDNAphage	1	1	classified	VC40945	FALSE	TRUE	temperate
SRR19939429	contig063238	contig063238	Duplodnaviria	Heunggongvirae	Uroviricota	Caudoviricetes	[Novel_Order]_{class}_Caudoviricetes	[Novel_Family]_{class}_Caudoviricetes	[Novel_Genus]_{class}_Caudoviricetes	Viruses	0.993	dsDNAphage	1	1	classified	VC27582	FALSE	TRUE	virulent
SRR19939430	contig063354	contig093531	Duplodnaviria	Heunggongvirae	Uroviricota	Caudoviricetes	[Novel_Order]_{class}_Caudoviricetes	[Novel_Family]_{class}_Caudoviricetes	[Novel_Genus]_{class}_Caudoviricetes	Viruses	0.987	dsDNAphage	1	4	classified	VC64779	FALSE	TRUE	virulent
SRR19939430	contig063461	contig063461	Duplodnaviria	Heunggongvirae	Uroviricota	Caudoviricetes	[Novel_Order]_{class}_Caudoviricetes	[Novel_Family]_{class}_Caudoviricetes	[Novel_Genus]_{class}_Caudoviricetes	Viruses	1	dsDNAphage	1	1	classified	VC27568	FALSE	TRUE	virulent
SRR19939430	contig063477	contig063477	Duplodnaviria	Heunggongvirae	Uroviricota	Caudoviricetes	[Novel_Order]_{class}_Caudoviricetes	[Novel_Family]_{class}_Caudoviricetes	[Novel_Genus]_{class}_Caudoviricetes	Viruses	0.98	dsDNAphage	1	3	classified	VC01974	FALSE	TRUE	temperate
SRR19939431	contig063555	contig063555	Duplodnaviria	Heunggongvirae	Uroviricota	Caudoviricetes	[Novel_Order]_{class}_Caudoviricetes	[Novel_Family]_{class}_Caudoviricetes	[Novel_Genus]_{class}_Caudoviricetes	Viruses	1	dsDNAphage	1	3	classified	VC25040	FALSE	TRUE	virulent
SRR19939431	contig063598	contig063598	Duplodnaviria	Heunggongvirae	Uroviricota	Caudoviricetes	[Novel_Order]_{class}_Caudoviricetes	[Novel_Family]_{class}_Caudoviricetes	[Novel_Genus]_{class}_Caudoviricetes	Viruses	1	dsDNAphage	1	3	classified	VC09545	FALSE	TRUE	temperate
SRR19939431	contig063703	contig063703	Duplodnaviria	Heunggongvirae	Uroviricota	Caudoviricetes	[Novel_Order]_{class}_Caudoviricetes	[Novel_Family]_{class}_Caudoviricetes	[Novel_Genus]_{class}_Caudoviricetes	Viruses	0.987	dsDNAphage	1	1	classified	VC73741	FALSE	TRUE	virulent
SRR19939431	contig063769	contig297007	Duplodnaviria	Heunggongvirae	Uroviricota	Caudoviricetes	[Novel_Order]_{class}_Caudoviricetes	[Novel_Family]_{class}_Caudoviricetes	[Novel_Genus]_{class}_Caudoviricetes	Viruses	1	dsDNAphage	1	2	classified	VC61610	FALSE	TRUE	temperate
SRR19939431	contig063802	contig063802	Duplodnaviria	Heunggongvirae	Uroviricota	Caudoviricetes	[Novel_Order]_{class}_Caudoviricetes	[Novel_Family]_{class}_Caudoviricetes	[Novel_Genus]_{class}_Caudoviricetes	Viruses	0.987	dsDNAphage	1	4	classified	VC38751	FALSE	TRUE	temperate
SRR19939431	contig063890	contig063890	Duplodnaviria	Heunggongvirae	Uroviricota	Caudoviricetes	[Novel_Order]_{class}_Caudoviricetes	[Novel_Family]_{class}_Caudoviricetes	[Novel_Genus]_{class}_Caudoviricetes	Viruses	1	dsDNAphage	1	3	classified	VC50661	FALSE	TRUE	temperate
SRR19939431	contig063917	contig063917	Duplodnaviria	Heunggongvirae	Uroviricota	Caudoviricetes	[Novel_Order]_{class}_Caudoviricetes	[Novel_Family]_{class}_Caudoviricetes	[Novel_Genus]_{class}_Caudoviricetes	Viruses	0.993	dsDNAphage	1	1	classified	VC66079	FALSE	TRUE	virulent
SRR19939431	contig063918	contig063918	Duplodnaviria	Heunggongvirae	Uroviricota	Caudoviricetes	[Novel_Order]_{class}_Caudoviricetes	[Novel_Family]_{class}_Caudoviricetes	[Novel_Genus]_{class}_Caudoviricetes	Viruses	1	dsDNAphage	1	1	classified	VC40923	FALSE	TRUE	temperate
SRR19939432	contig063920	contig063920	Duplodnaviria	Heunggongvirae	Uroviricota	Caudoviricetes	[Novel_Order]_{class}_Caudoviricetes	[Novel_Family]_{class}_Caudoviricetes	[Novel_Genus]_{class}_Caudoviricetes	Viruses	1	dsDNAphage	1	1	classified	VC02568	FALSE	TRUE	temperate
SRR19939432	contig063996	contig063996	Duplodnaviria	Heunggongvirae	Uroviricota	Caudoviricetes	[Novel_Order]_{class}_Caudoviricetes	[Novel_Family]_{class}_Caudoviricetes	[Novel_Genus]_{class}_Caudoviricetes	Viruses	0.993	dsDNAphage	1	4	classified	VC13136	FALSE	TRUE	temperate
SRR19939432	contig063997	contig063997	Duplodnaviria	Heunggongvirae	Uroviricota	Caudoviricetes	[Novel_Order]_{class}_Caudoviricetes	[Novel_Family]_{class}_Caudoviricetes	[Novel_Genus]_{class}_Caudoviricetes	Viruses	1	dsDNAphage	1	3	classified	VC66021	FALSE	TRUE	virulent
SRR19939433	contig064190	contig064190	Duplodnaviria	Heunggongvirae	Uroviricota	Caudoviricetes	[Novel_Order]_{class}_Caudoviricetes	[Novel_Family]_{class}_Caudoviricetes	[Novel_Genus]_{class}_Caudoviricetes	Viruses	0.987	dsDNAphage	1	1	classified	VC25719	FALSE	TRUE	virulent
SRR19939433	contig064369	contig064369	Duplodnaviria	Heunggongvirae	Uroviricota	Caudoviricetes	[Novel_Order]_{class}_Caudoviricetes	[Novel_Family]_{class}_Caudoviricetes	[Novel_Genus]_{class}_Caudoviricetes	Viruses	0.987	dsDNAphage	1	1	classified	VC27789	FALSE	TRUE	virulent
SRR19939433	contig064411	contig064411	Duplodnaviria	Heunggongvirae	Uroviricota	Caudoviricetes	[Novel_Order]_{class}_Caudoviricetes	[Novel_Family]_{class}_Caudoviricetes	[Novel_Genus]_{class}_Caudoviricetes	Viruses	0.98	dsDNAphage	1	2	classified	VC45595	FALSE	TRUE	temperate
SRR19939433	contig064556	contig064556	Duplodnaviria	Heunggongvirae	Uroviricota	Caudoviricetes	[Novel_Order]_{class}_Caudoviricetes	[Novel_Family]_{class}_Caudoviricetes	[Novel_Genus]_{class}_Caudoviricetes	Viruses	0.993	dsDNAphage	1	1	classified	VC27790	FALSE	TRUE	virulent
SRR19939433	contig064557	contig064557	Monodnaviria	Sangervirae	Phixviricota	Malgrandaviricetes	Petitvirales	Microviridae	[Novel_Genus]_{family}_Microviridae	Viruses	0.92	dsDNAphage	1	1	unclassified	VC77629	FALSE	FALSE	virulent
SRR19939434	contig064571	contig064571	Duplodnaviria	Heunggongvirae	Uroviricota	Caudoviricetes	[Unclassified_Order]_{genus}_Seuratvirus	[Unclassified_Family]_{genus}_Seuratvirus	Seuratvirus	Viruses	1	dsDNAphage	1	2	classified	VC74020	TRUE	FALSE	virulent
SRR19939433	contig064592	contig064592	Duplodnaviria	Heunggongvirae	Uroviricota	Caudoviricetes	[Novel_Order]_{class}_Caudoviricetes	[Novel_Family]_{class}_Caudoviricetes	[Novel_Genus]_{class}_Caudoviricetes	Viruses	1	dsDNAphage	1	1	classified	VC20020	FALSE	TRUE	temperate
SRR19939433	contig064593	contig064593	Monodnaviria	Sangervirae	Phixviricota	Malgrandaviricetes	Petitvirales	Microviridae	[Novel_Genus]_{family}_Microviridae	Viruses	0.993	dsDNAphage	1	1	unclassified	VC77630	FALSE	FALSE	virulent
SRR19939434	contig064606	contig064606	Duplodnaviria	Heunggongvirae	Uroviricota	Caudoviricetes	[Novel_Order]_{class}_Caudoviricetes	[Novel_Family]_{class}_Caudoviricetes	[Novel_Genus]_{class}_Caudoviricetes	Viruses	0.98	dsDNAphage	1	1	classified	VC11396	FALSE	TRUE	temperate
SRR19939434	contig064634	contig064634	Duplodnaviria	Heunggongvirae	Uroviricota	Caudoviricetes	[Novel_Order]_{class}_Caudoviricetes	[Novel_Family]_{class}_Caudoviricetes	[Novel_Genus]_{class}_Caudoviricetes	Viruses	1	dsDNAphage	1	4	classified	VC75186	FALSE	TRUE	virulent
SRR19939434	contig064638	contig064638	Duplodnaviria	Heunggongvirae	Uroviricota	Caudoviricetes	[Novel_Order]_{class}_Caudoviricetes	[Novel_Family]_{class}_Caudoviricetes	[Novel_Genus]_{class}_Caudoviricetes	Viruses	1	dsDNAphage	1	2	classified	VC67857	FALSE	TRUE	virulent
SRR19939434	contig064699	contig064699	Duplodnaviria	Heunggongvirae	Uroviricota	Caudoviricetes	[Novel_Order]_{class}_Caudoviricetes	[Novel_Family]_{class}_Caudoviricetes	[Novel_Genus]_{class}_Caudoviricetes	Viruses	1	dsDNAphage	1	2	classified	VC30206	FALSE	TRUE	virulent
SRR19939434	contig064784	contig064784	Duplodnaviria	Heunggongvirae	Uroviricota	Caudoviricetes	[Novel_Order]_{class}_Caudoviricetes	[Novel_Family]_{class}_Caudoviricetes	[Novel_Genus]_{class}_Caudoviricetes	Viruses	0.993	dsDNAphage	1	2	classified	VC45747	FALSE	TRUE	virulent
SRR19939434	contig064880	contig064880	Duplodnaviria	Heunggongvirae	Uroviricota	Caudoviricetes	[Novel_Order]_{class}_Caudoviricetes	[Novel_Family]_{class}_Caudoviricetes	[Novel_Genus]_{class}_Caudoviricetes	Viruses	0.993	dsDNAphage	1	3	classified	VC25254	FALSE	TRUE	temperate
SRR19939434	contig064985	contig064985	Duplodnaviria	Heunggongvirae	Uroviricota	Caudoviricetes	[Novel_Order]_{class}_Caudoviricetes	[Novel_Family]_{class}_Caudoviricetes	[Novel_Genus]_{class}_Caudoviricetes	Viruses	0.98	dsDNAphage	1	3	classified	VC05942	FALSE	TRUE	virulent
SRR19939434	contig065033	contig065033	Duplodnaviria	Heunggongvirae	Uroviricota	Caudoviricetes	[Novel_Order]_{class}_Caudoviricetes	[Novel_Family]_{class}_Caudoviricetes	[Novel_Genus]_{class}_Caudoviricetes	Viruses	1	dsDNAphage	1	1	classified	VC43325	FALSE	TRUE	virulent
SRR19939434	contig065099	contig065099	Duplodnaviria	Heunggongvirae	Uroviricota	Caudoviricetes	[Novel_Order]_{class}_Caudoviricetes	[Novel_Family]_{class}_Caudoviricetes	[Novel_Genus]_{class}_Caudoviricetes	Viruses	1	dsDNAphage	1	2	classified	VC27557	FALSE	TRUE	virulent
SRR19939434	contig065153	contig065153	Duplodnaviria	Heunggongvirae	Uroviricota	Caudoviricetes	[Novel_Order]_{class}_Caudoviricetes	[Novel_Family]_{class}_Caudoviricetes	[Novel_Genus]_{class}_Caudoviricetes	Viruses	1	dsDNAphage	1	4	classified	VC68805	FALSE	TRUE	temperate
SRR19939434	contig065207	contig065207	Duplodnaviria	Heunggongvirae	Uroviricota	Caudoviricetes	[Novel_Order]_{class}_Caudoviricetes	[Novel_Family]_{class}_Caudoviricetes	[Novel_Genus]_{class}_Caudoviricetes	Viruses	0.987	dsDNAphage	1	1	classified	VC23928	FALSE	TRUE	temperate
SRR19939434	contig065208	contig065208	Duplodnaviria	Heunggongvirae	Uroviricota	Caudoviricetes	[Novel_Order]_{class}_Caudoviricetes	[Novel_Family]_{class}_Caudoviricetes	[Novel_Genus]_{class}_Caudoviricetes	Viruses	0.98	dsDNAphage	1	1	classified	VC23724	FALSE	TRUE	virulent
SRR19939434	contig065210	contig065210	Duplodnaviria	Heunggongvirae	Uroviricota	Caudoviricetes	[Novel_Order]_{class}_Caudoviricetes	[Novel_Family]_{class}_Caudoviricetes	[Novel_Genus]_{class}_Caudoviricetes	Viruses	1	dsDNAphage	1	1	classified	VC58090	FALSE	TRUE	temperate
SRR19939434	contig065212	contig065212	Duplodnaviria	Heunggongvirae	Uroviricota	Caudoviricetes	[Novel_Order]_{class}_Caudoviricetes	[Novel_Family]_{class}_Caudoviricetes	[Novel_Genus]_{class}_Caudoviricetes	Viruses	0.987	dsDNAphage	1	1	classified	VC16582	FALSE	TRUE	virulent
SRR19939434	contig065213	contig065213	Duplodnaviria	Heunggongvirae	Uroviricota	Caudoviricetes	[Novel_Order]_{class}_Caudoviricetes	[Novel_Family]_{class}_Caudoviricetes	[Novel_Genus]_{class}_Caudoviricetes	Viruses	1	dsDNAphage	1	1	classified	VC35139	FALSE	TRUE	temperate
SRR19939434	contig065214	contig065214	Duplodnaviria	Heunggongvirae	Uroviricota	Caudoviricetes	[Novel_Order]_{class}_Caudoviricetes	[Novel_Family]_{class}_Caudoviricetes	[Novel_Genus]_{class}_Caudoviricetes	Viruses	0.993	dsDNAphage	1	1	classified	VC60281	FALSE	TRUE	temperate
SRR19939434	contig065215	contig107267	Duplodnaviria	Heunggongvirae	Uroviricota	Caudoviricetes	[Novel_Order]_{class}_Caudoviricetes	[Novel_Family]_{class}_Caudoviricetes	[Novel_Genus]_{class}_Caudoviricetes	Viruses	1	dsDNAphage	1	1	classified	VC61465	FALSE	TRUE	temperate
SRR19939434	contig065216	contig065216	Duplodnaviria	Heunggongvirae	Uroviricota	Caudoviricetes	[Novel_Order]_{class}_Caudoviricetes	[Novel_Family]_{class}_Caudoviricetes	[Novel_Genus]_{class}_Caudoviricetes	Viruses	1	dsDNAphage	1	1	classified	VC28489	FALSE	TRUE	virulent
SRR19939434	contig065217	contig065217	Monodnaviria	Sangervirae	Phixviricota	Malgrandaviricetes	Petitvirales	Microviridae	[Novel_Genus]_{family}_Microviridae	Viruses	1	dsDNAphage	1	1	unclassified	VC79063	FALSE	FALSE	virulent
SRR19939435	contig065236	contig065236	Duplodnaviria	Heunggongvirae	Uroviricota	Caudoviricetes	Crassvirales	Suoliviridae	[Novel_Genus]_{family}_Suoliviridae	Viruses	1	dsDNAphage	1	1	classified	VC00299	FALSE	TRUE	virulent
SRR19939435	contig065309	contig065309	Duplodnaviria	Heunggongvirae	Uroviricota	Caudoviricetes	[Novel_Order]_{class}_Caudoviricetes	[Novel_Family]_{class}_Caudoviricetes	[Novel_Genus]_{class}_Caudoviricetes	Viruses	0.993	dsDNAphage	1	1	classified	VC25425	FALSE	TRUE	temperate
SRR19939435	contig065405	contig065405	Duplodnaviria	Heunggongvirae	Uroviricota	Caudoviricetes	[Novel_Order]_{class}_Caudoviricetes	[Novel_Family]_{class}_Caudoviricetes	[Novel_Genus]_{class}_Caudoviricetes	Viruses	0.993	dsDNAphage	1	1	classified	VC59086	FALSE	TRUE	virulent
SRR19939435	contig065464	contig065464	Duplodnaviria	Heunggongvirae	Uroviricota	Caudoviricetes	[Novel_Order]_{class}_Caudoviricetes	[Novel_Family]_{class}_Caudoviricetes	[Novel_Genus]_{class}_Caudoviricetes	Viruses	0.94	dsDNAphage	1	2	classified	VC58203	FALSE	TRUE	temperate
SRR19939436	contig065738	contig065738	Monodnaviria	Sangervirae	Phixviricota	Malgrandaviricetes	Petitvirales	Microviridae	[Novel_Genus]_{family}_Microviridae	Viruses	1	dsDNAphage	1	1	unclassified	VC77631	FALSE	FALSE	virulent
SRR19939437	contig065780	contig065780	Duplodnaviria	Heunggongvirae	Uroviricota	Caudoviricetes	[Novel_Order]_{class}_Caudoviricetes	[Novel_Family]_{class}_Caudoviricetes	[Novel_Genus]_{class}_Caudoviricetes	Viruses	1	dsDNAphage	1	3	classified	VC32924	FALSE	TRUE	temperate
SRR19939437	contig066001	contig066001	Duplodnaviria	Heunggongvirae	Uroviricota	Caudoviricetes	[Novel_Order]_{class}_Caudoviricetes	[Novel_Family]_{class}_Caudoviricetes	[Novel_Genus]_{class}_Caudoviricetes	Viruses	1	dsDNAphage	1	1	classified	VC62058	FALSE	TRUE	virulent
SRR20661404	contig066010	contig066010	Duplodnaviria	Heunggongvirae	Uroviricota	Caudoviricetes	[Novel_Order]_{class}_Caudoviricetes	[Novel_Family]_{class}_Caudoviricetes	[Novel_Genus]_{class}_Caudoviricetes	Viruses	0.987	dsDNAphage	1	2	classified	VC57819	FALSE	TRUE	virulent
SRR20661404	contig066014	contig066014	Duplodnaviria	Heunggongvirae	Uroviricota	Caudoviricetes	[Novel_Order]_{class}_Caudoviricetes	[Novel_Family]_{class}_Caudoviricetes	[Novel_Genus]_{class}_Caudoviricetes	Viruses	0.987	dsDNAphage	1	2	classified	VC58880	TRUE	FALSE	temperate
SRR20661404	contig066111	contig066111	Duplodnaviria	Heunggongvirae	Uroviricota	Caudoviricetes	Crassvirales	[Novel_Family]_{order}_Crassvirales	[Novel_Genus]_{order}_Crassvirales	Viruses	0.98	dsDNAphage	1	4	classified	VC00145	FALSE	TRUE	virulent
SRR20661404	contig066122	contig068263	Duplodnaviria	Heunggongvirae	Uroviricota	Caudoviricetes	[Novel_Order]_{class}_Caudoviricetes	[Novel_Family]_{class}_Caudoviricetes	[Novel_Genus]_{class}_Caudoviricetes	Viruses	0.987	dsDNAphage	1	1	classified	VC71146	FALSE	TRUE	virulent
SRR20661404	contig066123	contig066123	Duplodnaviria	Heunggongvirae	Uroviricota	Caudoviricetes	Crassvirales	Suoliviridae	[Novel_Genus]_{family}_Suoliviridae	Viruses	0.993	dsDNAphage	1	1	classified	VC00367	FALSE	TRUE	virulent
SRR20661404	contig066125	contig066125	Duplodnaviria	Heunggongvirae	Uroviricota	Caudoviricetes	Crassvirales	Steigviridae	[Novel_Genus]_{family}_Steigviridae	Viruses	1	dsDNAphage	1	1	classified	VC00156	FALSE	TRUE	virulent
SRR20661405	contig066137	contig066137	Duplodnaviria	Heunggongvirae	Uroviricota	Caudoviricetes	[Novel_Order]_{class}_Caudoviricetes	[Novel_Family]_{class}_Caudoviricetes	[Novel_Genus]_{class}_Caudoviricetes	Viruses	0.98	dsDNAphage	1	3	classified	VC20073	FALSE	TRUE	virulent
SRR20661405	contig066155	contig066155	Duplodnaviria	Heunggongvirae	Uroviricota	Caudoviricetes	[Novel_Order]_{class}_Caudoviricetes	[Novel_Family]_{class}_Caudoviricetes	[Novel_Genus]_{class}_Caudoviricetes	Viruses	1	dsDNAphage	1	3	classified	VC62535	FALSE	TRUE	temperate
SRR20661405	contig066164	contig066164	Duplodnaviria	Heunggongvirae	Uroviricota	Caudoviricetes	[Novel_Order]_{class}_Caudoviricetes	[Novel_Family]_{class}_Caudoviricetes	[Novel_Genus]_{class}_Caudoviricetes	Viruses	1	dsDNAphage	1	1	classified	VC00438	FALSE	TRUE	virulent
SRR20661405	contig066182	contig234685	Duplodnaviria	Heunggongvirae	Uroviricota	Caudoviricetes	[Novel_Order]_{class}_Caudoviricetes	[Novel_Family]_{class}_Caudoviricetes	[Novel_Genus]_{class}_Caudoviricetes	Viruses	1	dsDNAphage	1	2	classified	VC50439	FALSE	TRUE	virulent
SRR20661405	contig066185	contig066185	Duplodnaviria	Heunggongvirae	Uroviricota	Caudoviricetes	Crassvirales	[Novel_Family]_{order}_Crassvirales	[Novel_Genus]_{order}_Crassvirales	Viruses	1	dsDNAphage	1	1	classified	VC00145	FALSE	TRUE	virulent
SRR20661405	contig066192	contig233310	Duplodnaviria	Heunggongvirae	Uroviricota	Caudoviricetes	[Novel_Order]_{class}_Caudoviricetes	[Novel_Family]_{class}_Caudoviricetes	[Novel_Genus]_{class}_Caudoviricetes	Viruses	1	dsDNAphage	1	1	classified	VC71521	FALSE	TRUE	virulent
SRR20661405	contig066220	contig067517	Duplodnaviria	Heunggongvirae	Uroviricota	Caudoviricetes	[Novel_Order]_{class}_Caudoviricetes	[Novel_Family]_{class}_Caudoviricetes	[Novel_Genus]_{class}_Caudoviricetes	Viruses	1	dsDNAphage	1	4	classified	VC41252	FALSE	TRUE	temperate
SRR20661405	contig066246	contig066246	Duplodnaviria	Heunggongvirae	Uroviricota	Caudoviricetes	[Novel_Order]_{class}_Caudoviricetes	[Novel_Family]_{class}_Caudoviricetes	[Novel_Genus]_{class}_Caudoviricetes	Viruses	1	dsDNAphage	1	1	classified	VC10472	FALSE	TRUE	temperate
SRR20661405	contig066329	contig066329	Duplodnaviria	Heunggongvirae	Uroviricota	Caudoviricetes	[Novel_Order]_{class}_Caudoviricetes	[Novel_Family]_{class}_Caudoviricetes	[Novel_Genus]_{class}_Caudoviricetes	Viruses	1	dsDNAphage	1	2	classified	VC34113	FALSE	TRUE	virulent
SRR20661405	contig066351	contig066351	Duplodnaviria	Heunggongvirae	Uroviricota	Caudoviricetes	[Novel_Order]_{class}_Caudoviricetes	[Novel_Family]_{class}_Caudoviricetes	[Novel_Genus]_{class}_Caudoviricetes	Viruses	0.993	dsDNAphage	1	4	classified	VC75307	FALSE	TRUE	virulent
SRR20661405	contig066356	contig066356	Duplodnaviria	Heunggongvirae	Uroviricota	Caudoviricetes	[Novel_Order]_{class}_Caudoviricetes	[Novel_Family]_{class}_Caudoviricetes	[Novel_Genus]_{class}_Caudoviricetes	Viruses	1	dsDNAphage	1	1	classified	VC71293	FALSE	TRUE	virulent
SRR20661405	contig066357	contig071529	Duplodnaviria	Heunggongvirae	Uroviricota	Caudoviricetes	[Novel_Order]_{class}_Caudoviricetes	[Novel_Family]_{class}_Caudoviricetes	[Novel_Genus]_{class}_Caudoviricetes	Viruses	1	dsDNAphage	1	1	classified	VC53243	FALSE	TRUE	virulent
SRR20661405	contig066366	contig066366	Duplodnaviria	Heunggongvirae	Uroviricota	Caudoviricetes	[Novel_Order]_{class}_Caudoviricetes	[Novel_Family]_{class}_Caudoviricetes	[Novel_Genus]_{class}_Caudoviricetes	Viruses	1	dsDNAphage	1	1	classified	VC64792	FALSE	TRUE	temperate
SRR20661405	contig066367	contig066367	Duplodnaviria	Heunggongvirae	Uroviricota	Caudoviricetes	[Novel_Order]_{class}_Caudoviricetes	[Novel_Family]_{class}_Caudoviricetes	[Novel_Genus]_{class}_Caudoviricetes	Viruses	0.987	dsDNAphage	1	1	classified	VC46705	FALSE	TRUE	virulent
SRR20661405	contig066368	contig234472	Duplodnaviria	Heunggongvirae	Uroviricota	Caudoviricetes	[Novel_Order]_{class}_Caudoviricetes	[Novel_Family]_{class}_Caudoviricetes	[Novel_Genus]_{class}_Caudoviricetes	Viruses	1	dsDNAphage	1	1	classified	VC62055	FALSE	TRUE	virulent
SRR20661406	contig066372	contig066372	Duplodnaviria	Heunggongvirae	Uroviricota	Caudoviricetes	[Novel_Order]_{class}_Caudoviricetes	[Novel_Family]_{class}_Caudoviricetes	[Novel_Genus]_{class}_Caudoviricetes	Viruses	0.993	dsDNAphage	1	1	classified	VC36581	FALSE	TRUE	temperate
SRR20661406	contig066400	contig066400	Duplodnaviria	Heunggongvirae	Uroviricota	Caudoviricetes	[Novel_Order]_{class}_Caudoviricetes	[Novel_Family]_{class}_Caudoviricetes	[Novel_Genus]_{class}_Caudoviricetes	Viruses	1	dsDNAphage	1	1	classified	VC38976	FALSE	TRUE	virulent
SRR20661406	contig066431	contig067077	Duplodnaviria	Heunggongvirae	Uroviricota	Caudoviricetes	[Novel_Order]_{class}_Caudoviricetes	[Novel_Family]_{class}_Caudoviricetes	[Novel_Genus]_{class}_Caudoviricetes	Viruses	0.98	dsDNAphage	1	4	classified	VC44962	FALSE	TRUE	temperate
SRR20661406	contig066441	contig066441	Duplodnaviria	Heunggongvirae	Uroviricota	Caudoviricetes	[Novel_Order]_{class}_Caudoviricetes	[Novel_Family]_{class}_Caudoviricetes	[Novel_Genus]_{class}_Caudoviricetes	Viruses	1	dsDNAphage	1	1	classified	VC70465	TRUE	FALSE	virulent
SRR20661406	contig066454	contig071320	Monodnaviria	Sangervirae	Phixviricota	Malgrandaviricetes	Petitvirales	Microviridae	[Novel_Genus]_{family}_Microviridae	Viruses	1	dsDNAphage	1	1	unclassified	VC79147	FALSE	FALSE	virulent
SRR20661406	contig066495	contig138749	Duplodnaviria	Heunggongvirae	Uroviricota	Caudoviricetes	[Novel_Order]_{class}_Caudoviricetes	[Novel_Family]_{class}_Caudoviricetes	[Novel_Genus]_{class}_Caudoviricetes	Viruses	0.993	dsDNAphage	1	2	classified	VC61462	FALSE	TRUE	temperate
SRR20661406	contig066504	contig066504	Duplodnaviria	Heunggongvirae	Uroviricota	Caudoviricetes	Crassvirales	[Novel_Family]_{order}_Crassvirales	[Novel_Genus]_{order}_Crassvirales	Viruses	1	dsDNAphage	1	1	classified	VC00117	FALSE	TRUE	virulent
SRR20661406	contig066505	contig066505	Duplodnaviria	Heunggongvirae	Uroviricota	Caudoviricetes	[Novel_Order]_{class}_Caudoviricetes	[Novel_Family]_{class}_Caudoviricetes	[Novel_Genus]_{class}_Caudoviricetes	Viruses	0.993	dsDNAphage	1	1	classified	VC65309	FALSE	TRUE	virulent
SRR20661407	contig066507	contig066507	Duplodnaviria	Heunggongvirae	Uroviricota	Caudoviricetes	[Novel_Order]_{class}_Caudoviricetes	[Novel_Family]_{class}_Caudoviricetes	[Novel_Genus]_{class}_Caudoviricetes	Viruses	1	dsDNAphage	1	3	classified	VC19845	FALSE	TRUE	virulent
SRR20661407	contig066509	contig066509	Duplodnaviria	Heunggongvirae	Uroviricota	Caudoviricetes	[Novel_Order]_{class}_Caudoviricetes	[Novel_Family]_{class}_Caudoviricetes	[Novel_Genus]_{class}_Caudoviricetes	Viruses	1	dsDNAphage	1	1	classified	VC02056	FALSE	TRUE	virulent
SRR20661407	contig066532	contig066532	Duplodnaviria	Heunggongvirae	Uroviricota	Caudoviricetes	[Novel_Order]_{class}_Caudoviricetes	[Novel_Family]_{class}_Caudoviricetes	[Novel_Genus]_{class}_Caudoviricetes	Viruses	0.96	dsDNAphage	1	1	classified	VC16369	FALSE	TRUE	virulent
SRR20661407	contig066534	contig066534	Duplodnaviria	Heunggongvirae	Uroviricota	Caudoviricetes	[Novel_Order]_{class}_Caudoviricetes	[Novel_Family]_{class}_Caudoviricetes	[Novel_Genus]_{class}_Caudoviricetes	Viruses	0.987	dsDNAphage	1	1	classified	VC41282	FALSE	TRUE	temperate
SRR20661406	contig066545	contig066545	Duplodnaviria	Heunggongvirae	Uroviricota	Caudoviricetes	Crassvirales	Steigviridae	[Novel_Genus]_{family}_Steigviridae	Viruses	1	dsDNAphage	1	1	classified	VC00159	FALSE	TRUE	virulent
SRR20661406	contig066546	contig072281	Duplodnaviria	Heunggongvirae	Uroviricota	Caudoviricetes	[Novel_Order]_{class}_Caudoviricetes	[Novel_Family]_{class}_Caudoviricetes	[Novel_Genus]_{class}_Caudoviricetes	Viruses	1	dsDNAphage	1	1	classified	VC08521	FALSE	TRUE	virulent
SRR20661406	contig066547	contig066547	Monodnaviria	Sangervirae	Phixviricota	Malgrandaviricetes	Petitvirales	Microviridae	[Novel_Genus]_{family}_Microviridae	Viruses	0.993	dsDNAphage	1	1	classified	VC18365	FALSE	TRUE	virulent
SRR20661406	contig066548	contig066965	Duplodnaviria	Heunggongvirae	Uroviricota	Caudoviricetes	[Novel_Order]_{class}_Caudoviricetes	[Novel_Family]_{class}_Caudoviricetes	[Novel_Genus]_{class}_Caudoviricetes	Viruses	1	dsDNAphage	1	1	classified	VC08766	FALSE	TRUE	virulent
SRR20661407	contig066551	contig066551	Duplodnaviria	Heunggongvirae	Uroviricota	Caudoviricetes	[Novel_Order]_{class}_Caudoviricetes	[Novel_Family]_{class}_Caudoviricetes	[Novel_Genus]_{class}_Caudoviricetes	Viruses	1	dsDNAphage	1	1	classified	VC70823	FALSE	TRUE	virulent
SRR20661407	contig066554	contig066554	Duplodnaviria	Heunggongvirae	Uroviricota	Caudoviricetes	[Unclassified_Order]_{family}_Drexlerviridae	Drexlerviridae	[Novel_Genus]_{family}_Drexlerviridae	Viruses	1	dsDNAphage	1	1	classified	VC71869	TRUE	FALSE	virulent
SRR20661407	contig066555	contig066555	Duplodnaviria	Heunggongvirae	Uroviricota	Caudoviricetes	[Unclassified_Order]_{family}_Drexlerviridae	Drexlerviridae	[Novel_Genus]_{family}_Drexlerviridae	Viruses	1	dsDNAphage	1	1	classified	VC71872	TRUE	FALSE	virulent
SRR20661407	contig066557	contig066557	Duplodnaviria	Heunggongvirae	Uroviricota	Caudoviricetes	Crassvirales	[Novel_Family]_{order}_Crassvirales	[Novel_Genus]_{order}_Crassvirales	Viruses	1	dsDNAphage	1	1	classified	VC00145	FALSE	TRUE	virulent
SRR20661407	contig066585	contig066585	Duplodnaviria	Heunggongvirae	Uroviricota	Caudoviricetes	[Novel_Order]_{class}_Caudoviricetes	[Novel_Family]_{class}_Caudoviricetes	[Novel_Genus]_{class}_Caudoviricetes	Viruses	0.987	dsDNAphage	1	3	classified	VC76529	FALSE	TRUE	virulent
SRR20661407	contig066604	contig066604	Duplodnaviria	Heunggongvirae	Uroviricota	Caudoviricetes	[Novel_Order]_{class}_Caudoviricetes	[Novel_Family]_{class}_Caudoviricetes	[Novel_Genus]_{class}_Caudoviricetes	Viruses	1	dsDNAphage	1	3	classified	VC63145	FALSE	TRUE	temperate
SRR20661407	contig066689	contig066689	Duplodnaviria	Heunggongvirae	Uroviricota	Caudoviricetes	[Novel_Order]_{class}_Caudoviricetes	[Novel_Family]_{class}_Caudoviricetes	[Novel_Genus]_{class}_Caudoviricetes	Viruses	1	dsDNAphage	1	2	classified	VC46907	FALSE	TRUE	virulent
SRR20661407	contig066694	contig066694	Duplodnaviria	Heunggongvirae	Uroviricota	Caudoviricetes	[Novel_Order]_{class}_Caudoviricetes	[Novel_Family]_{class}_Caudoviricetes	[Novel_Genus]_{class}_Caudoviricetes	Viruses	1	dsDNAphage	1	2	classified	VC37964	FALSE	TRUE	temperate
SRR20661407	contig066705	contig066705	Duplodnaviria	Heunggongvirae	Uroviricota	Caudoviricetes	[Novel_Order]_{class}_Caudoviricetes	[Novel_Family]_{class}_Caudoviricetes	[Novel_Genus]_{class}_Caudoviricetes	Viruses	1	dsDNAphage	1	3	classified	VC76335	FALSE	TRUE	virulent
SRR20661407	contig066722	contig066722	Duplodnaviria	Heunggongvirae	Uroviricota	Caudoviricetes	[Novel_Order]_{class}_Caudoviricetes	[Novel_Family]_{class}_Caudoviricetes	[Novel_Genus]_{class}_Caudoviricetes	Viruses	0.993	dsDNAphage	1	2	classified	VC30426	FALSE	TRUE	virulent
SRR20661407	contig066723	contig066723	Duplodnaviria	Heunggongvirae	Uroviricota	Caudoviricetes	[Novel_Order]_{class}_Caudoviricetes	[Novel_Family]_{class}_Caudoviricetes	[Novel_Genus]_{class}_Caudoviricetes	Viruses	1	dsDNAphage	1	1	classified	VC61587	FALSE	TRUE	virulent
SRR20661407	contig066728	contig067171	Duplodnaviria	Heunggongvirae	Uroviricota	Caudoviricetes	[Novel_Order]_{class}_Caudoviricetes	[Novel_Family]_{class}_Caudoviricetes	[Novel_Genus]_{class}_Caudoviricetes	Viruses	0.993	dsDNAphage	1	1	classified	VC57123	FALSE	TRUE	temperate
SRR20661407	contig066743	contig066743	Duplodnaviria	Heunggongvirae	Uroviricota	Caudoviricetes	[Unclassified_Order]_{family}_Autographiviridae	Autographiviridae	[Novel_Genus]_{family}_Autographiviridae	Viruses	0.993	dsDNAphage	1	1	classified	VC67665	FALSE	TRUE	virulent
SRR20661407	contig066785	contig066785	Duplodnaviria	Heunggongvirae	Uroviricota	Caudoviricetes	[Novel_Order]_{class}_Caudoviricetes	[Novel_Family]_{class}_Caudoviricetes	[Novel_Genus]_{class}_Caudoviricetes	Viruses	1	dsDNAphage	1	1	classified	VC69136	FALSE	TRUE	temperate
SRR20661408	contig066789	contig066789	Duplodnaviria	Heunggongvirae	Uroviricota	Caudoviricetes	[Novel_Order]_{class}_Caudoviricetes	[Novel_Family]_{class}_Caudoviricetes	[Novel_Genus]_{class}_Caudoviricetes	Viruses	1	dsDNAphage	1	1	classified	VC13707	FALSE	TRUE	virulent
SRR20661408	contig066798	contig066798	Duplodnaviria	Heunggongvirae	Uroviricota	Caudoviricetes	[Unclassified_Order]_{family}_Rountreeviridae	Rountreeviridae	Minhovirus	Viruses	1	dsDNAphage	1	2	classified	VC74788	TRUE	FALSE	virulent
SRR20661408	contig066800	contig066800	Duplodnaviria	Heunggongvirae	Uroviricota	Caudoviricetes	[Novel_Order]_{class}_Caudoviricetes	[Novel_Family]_{class}_Caudoviricetes	[Novel_Genus]_{class}_Caudoviricetes	Viruses	1	dsDNAphage	1	2	classified	VC53427	FALSE	TRUE	temperate
SRR20661408	contig066833	contig071415	Duplodnaviria	Heunggongvirae	Uroviricota	Caudoviricetes	[Unclassified_Order]_{family}_Rountreeviridae	Rountreeviridae	[Novel_Genus]_{family}_Rountreeviridae	Viruses	1	dsDNAphage	1	3	classified	VC74815	FALSE	TRUE	virulent
SRR20661407	contig066842	contig066842	Duplodnaviria	Heunggongvirae	Uroviricota	Caudoviricetes	[Novel_Order]_{class}_Caudoviricetes	[Novel_Family]_{class}_Caudoviricetes	[Novel_Genus]_{class}_Caudoviricetes	Viruses	1	dsDNAphage	1	1	classified	VC61609	FALSE	TRUE	virulent
SRR20661408	contig066873	contig214053	Duplodnaviria	Heunggongvirae	Uroviricota	Caudoviricetes	[Novel_Order]_{class}_Caudoviricetes	[Novel_Family]_{class}_Caudoviricetes	[Novel_Genus]_{class}_Caudoviricetes	Viruses	1	dsDNAphage	1	1	classified	VC40477	FALSE	TRUE	virulent
SRR20661409	contig066878	contig070808	Duplodnaviria	Heunggongvirae	Uroviricota	Caudoviricetes	[Novel_Order]_{class}_Caudoviricetes	[Novel_Family]_{class}_Caudoviricetes	[Novel_Genus]_{class}_Caudoviricetes	Viruses	1	dsDNAphage	1	1	classified	VC51084	FALSE	TRUE	temperate
SRR20661409	contig066928	contig066928	Duplodnaviria	Heunggongvirae	Uroviricota	Caudoviricetes	[Unclassified_Order]_{family}_Rountreeviridae	Rountreeviridae	Minhovirus	Viruses	1	dsDNAphage	1	2	classified	VC74788	TRUE	FALSE	virulent
SRR20661409	contig066960	contig066960	Duplodnaviria	Heunggongvirae	Uroviricota	Caudoviricetes	[Novel_Order]_{class}_Caudoviricetes	[Novel_Family]_{class}_Caudoviricetes	[Novel_Genus]_{class}_Caudoviricetes	Viruses	1	dsDNAphage	1	1	classified	VC29172	FALSE	TRUE	temperate
SRR20661410	contig066970	contig071466	Duplodnaviria	Heunggongvirae	Uroviricota	Caudoviricetes	[Novel_Order]_{class}_Caudoviricetes	[Novel_Family]_{class}_Caudoviricetes	[Novel_Genus]_{class}_Caudoviricetes	Viruses	1	dsDNAphage	1	2	classified	VC53751	FALSE	TRUE	temperate
SRR20661409	contig066989	contig066989	Duplodnaviria	Heunggongvirae	Uroviricota	Caudoviricetes	[Novel_Order]_{class}_Caudoviricetes	[Novel_Family]_{class}_Caudoviricetes	[Novel_Genus]_{class}_Caudoviricetes	Viruses	1	dsDNAphage	1	1	classified	VC66398	FALSE	TRUE	virulent
SRR20661410	contig066993	contig066993	Duplodnaviria	Heunggongvirae	Uroviricota	Caudoviricetes	[Novel_Order]_{class}_Caudoviricetes	[Novel_Family]_{class}_Caudoviricetes	[Novel_Genus]_{class}_Caudoviricetes	Viruses	1	dsDNAphage	1	1	classified	VC52648	FALSE	TRUE	temperate
SRR20661410	contig066994	contig066994	Duplodnaviria	Heunggongvirae	Uroviricota	Caudoviricetes	[Novel_Order]_{class}_Caudoviricetes	[Novel_Family]_{class}_Caudoviricetes	[Novel_Genus]_{class}_Caudoviricetes	Viruses	0.993	dsDNAphage	1	4	classified	VC53699	FALSE	TRUE	temperate
SRR20661410	contig067010	contig067010	Duplodnaviria	Heunggongvirae	Uroviricota	Caudoviricetes	[Novel_Order]_{class}_Caudoviricetes	[Novel_Family]_{class}_Caudoviricetes	[Novel_Genus]_{class}_Caudoviricetes	Viruses	1	dsDNAphage	1	2	classified	VC13514	TRUE	FALSE	temperate
SRR20661410	contig067025	contig138525	Duplodnaviria	Heunggongvirae	Uroviricota	Caudoviricetes	[Novel_Order]_{class}_Caudoviricetes	[Novel_Family]_{class}_Caudoviricetes	[Novel_Genus]_{class}_Caudoviricetes	Viruses	0.993	dsDNAphage	1	1	classified	VC39254	FALSE	TRUE	temperate
SRR20661411	contig067071	contig067071	Duplodnaviria	Heunggongvirae	Uroviricota	Caudoviricetes	[Novel_Order]_{class}_Caudoviricetes	[Novel_Family]_{class}_Caudoviricetes	[Novel_Genus]_{class}_Caudoviricetes	Viruses	1	dsDNAphage	1	1	classified	VC29277	FALSE	TRUE	virulent
SRR20661411	contig067112	contig067112	Duplodnaviria	Heunggongvirae	Uroviricota	Caudoviricetes	[Novel_Order]_{class}_Caudoviricetes	[Novel_Family]_{class}_Caudoviricetes	[Novel_Genus]_{class}_Caudoviricetes	Viruses	1	dsDNAphage	1	1	classified	VC66031	FALSE	TRUE	virulent
SRR20661411	contig067116	contig067116	Duplodnaviria	Heunggongvirae	Uroviricota	Caudoviricetes	[Novel_Order]_{class}_Caudoviricetes	[Novel_Family]_{class}_Caudoviricetes	[Novel_Genus]_{class}_Caudoviricetes	Viruses	0.973	dsDNAphage	1	1	classified	VC53105	FALSE	TRUE	temperate
SRR20661411	contig067132	contig067132	Duplodnaviria	Heunggongvirae	Uroviricota	Caudoviricetes	[Novel_Order]_{class}_Caudoviricetes	[Novel_Family]_{class}_Caudoviricetes	[Novel_Genus]_{class}_Caudoviricetes	Viruses	1	dsDNAphage	1	1	classified	VC20695	FALSE	TRUE	virulent
[truncated: 60,136 more rows]
