# Supplementary material for: Global Characterization of the Avian Gut Virome Reveals Extensive Viral Diversity and Functional Implications
Source: Research Square preprint supplement (doi:10.21203/rs.3.rs-6913311/v1), 2025-10-16
Supplement: Supplementary file 7 [file a09527b6eb1ed3eb5d5ac87b.xlsx]

## Sheet: dramv_ARG_ncbi
Supplementary Table S7: The detail information of ARGs of avian gut virome identified in NCBI databases.
#FILE	SEQUENCE	START	END	STRAND	GENE	COVERAGE	COVERAGE_MAP	GAPS	%COVERAGE	%IDENTITY	DATABASE	ACCESSION	PRODUCT	RESISTANCE
input.faa	contig002358-cat_1_42	1	651	+	catA14	1-651/651	===============	0/0	100	95.85	ncbi	NG_047573.1	type A-14 chloramphenicol O-acetyltransferase	CHLORAMPHENICOL
input.faa	contig005275-cat_1_9	1	777	+	aad9	1-777/777	===============	0/0	100	100	ncbi	NG_047322.1	ANT(9) family aminoglycoside nucleotidyltransferase	AMINOGLYCOSIDE
input.faa	contig008023-cat_1_1	1	729	+	erm(B)	10-738/738	===============	0/0	98.78	100	ncbi	NG_047794.1	23S rRNA (adenine(2058)-N(6))-methyltransferase Erm(B)	MACROLIDE
input.faa	contig024172-cat_1_3	1	906	+	aph(2'')-IVa	1-906/906	===============	0/0	100	100	ncbi	NG_047403.1	aminoglycoside O-phosphotransferase APH(2'')-IVa	AMIKACIN;GENTAMICIN;KANAMYCIN;TOBRAMYCIN
input.faa	contig035293-cat_1_25	1	966	+	cfxA4	1-966/966	===============	0/0	100	100	ncbi	NG_047642.1	class A extended-spectrum beta-lactamase CfxA4	BETA-LACTAM
input.faa	contig057519-cat_2_1	10	1032	+	cfr(C)	1-1022/1140	===============	45658	89.65	99.61	ncbi	NG_060579.1	23S rRNA (adenine(2503)-C(8))-methyltransferase Cfr(C)	LINCOSAMIDE;MACROLIDE;STREPTOGRAMIN
input.faa	contig058908-cat_1_3	1	651	+	catA9	1-651/651	===============	0/0	100	96.62	ncbi	NG_047564.1	type A-9 chloramphenicol O-acetyltransferase	CHLORAMPHENICOL
input.faa	contig066981-cat_1_9	1	735	+	erm(G)	1-735/735	===============	0/0	100	100	ncbi	NG_047827.1	23S rRNA (adenine(2058)-N(6))-methyltransferase Erm(G)	MACROLIDE
input.faa	contig070200-cat_1_1	1	441	+	lnu(C)	1-441/495	===============	0/0	89.09	99.09	ncbi	NG_047924.1	lincosamide nucleotidyltransferase Lnu(C)	LINCOSAMIDE
input.faa	contig077649-cat_1_16	1	735	+	erm(G)	1-735/735	===============	0/0	100	99.86	ncbi	NG_047827.1	23S rRNA (adenine(2058)-N(6))-methyltransferase Erm(G)	MACROLIDE
input.faa	contig078096-cat_2_10	1	1035	+	cfr-Cb	1-1035/1035	===============	0/0	100	96.72	ncbi	NG_055643.1	Cfr family 23S rRNA (adenine(2503)-C(8))-methyltransferase	LINCOSAMIDE;MACROLIDE;STREPTOGRAMIN
input.faa	contig084838-cat_1_9	1	867	+	aadE	1-867/867	===============	0/0	100	100	ncbi	NG_047378.1	aminoglycoside 6-adenylyltransferase AadE	STREPTOMYCIN
input.faa	contig090873-cat_1_1	1	495	+	lnu(C)	1-495/495	===============	0/0	100	98.99	ncbi	NG_047924.1	lincosamide nucleotidyltransferase Lnu(C)	LINCOSAMIDE
input.faa	contig096448-cat_2_6	1	735	+	erm(G)	1-735/735	===============	0/0	100	100	ncbi	NG_047827.1	23S rRNA (adenine(2058)-N(6))-methyltransferase Erm(G)	MACROLIDE
input.faa	contig098984-cat_1_3	1	867	+	aadE	1-867/867	===============	0/0	100	100	ncbi	NG_047378.1	aminoglycoside 6-adenylyltransferase AadE	STREPTOMYCIN
input.faa	contig099669-cat_1_2	23	708	+	erm(B)	53-738/738	.==============	0/0	92.95	100	ncbi	NG_047793.1	23S rRNA (adenine(2058)-N(6))-methyltransferase Erm(B)	MACROLIDE
input.faa	contig113615-cat_1_1	1	795	+	aph(3')-IIIa	1-795/795	===============	0/0	100	100	ncbi	NG_047418.1	aminoglycoside O-phosphotransferase APH(3')-IIIa	AMIKACIN;KANAMYCIN
input.faa	contig115649-cat_2_9	1	735	+	erm(G)	1-735/735	===============	0/0	100	100	ncbi	NG_047827.1	23S rRNA (adenine(2058)-N(6))-methyltransferase Erm(G)	MACROLIDE
input.faa	contig117182-cat_2_7	1	735	+	erm(G)	1-735/735	===============	0/0	100	100	ncbi	NG_047827.1	23S rRNA (adenine(2058)-N(6))-methyltransferase Erm(G)	MACROLIDE
input.faa	contig123284-cat_1_2	1	855	+	erm(X)	1-855/855	===============	0/0	100	99.88	ncbi	NG_047853.1	23S rRNA (adenine(2058)-N(6))-methyltransferase Erm(X)	MACROLIDE
input.faa	contig135003-cat_1_60	1	1218	+	mef(A)	1-1218/1218	===============	0/0	100	94.5	ncbi	NG_047972.1	macrolide efflux MFS transporter Mef(A)	MACROLIDE
input.faa	contig136695-cat_1_2	1	966	+	cfxA4	1-966/966	===============	0/0	100	100	ncbi	NG_047642.1	class A extended-spectrum beta-lactamase CfxA4	BETA-LACTAM
input.faa	contig138526-cat_1_11	1	735	+	erm(G)	1-735/735	===============	0/0	100	100	ncbi	NG_047827.1	23S rRNA (adenine(2058)-N(6))-methyltransferase Erm(G)	MACROLIDE
input.faa	contig139541-cat_1_25	109	905	+	aph(2'')-Ih	70-866/894	.==============	0/0	89.15	82.43	ncbi	NG_047408.1	aminoglycoside O-phosphotransferase APH(2'')-Ih	AMIKACIN;GENTAMICIN;KANAMYCIN;TOBRAMYCIN
input.faa	contig140483-cat_1_7	1	771	+	ant(4')-Ia	1-771/771	===============	0/0	100	95.59	ncbi	NG_047375.1	aminoglycoside O-nucleotidyltransferase ANT(4')-Ia	KANAMYCIN;TOBRAMYCIN
input.faa	contig141689-cat_1_65	1	855	+	erm(X)	1-855/855	===============	0/0	100	99.88	ncbi	NG_047853.1	23S rRNA (adenine(2058)-N(6))-methyltransferase Erm(X)	MACROLIDE
input.faa	contig142489-cat_1_1	1	855	+	erm(X)	1-855/855	===============	0/0	100	99.88	ncbi	NG_047853.1	23S rRNA (adenine(2058)-N(6))-methyltransferase Erm(X)	MACROLIDE
input.faa	contig142621-cat_1_2	1	855	+	erm(X)	1-855/855	===============	0/0	100	99.88	ncbi	NG_047853.1	23S rRNA (adenine(2058)-N(6))-methyltransferase Erm(X)	MACROLIDE
input.faa	contig157494-cat_1_2	1	501	+	lnu(P)	1-501/501	===============	0/0	100	100	ncbi	NG_047929.1	lincosamide nucleotidyltransferase Lnu(P)	LINCOSAMIDE
input.faa	contig161695-cat_1_7	1	771	+	ant(4')-Ia	1-771/771	===============	0/0	100	95.59	ncbi	NG_047375.1	aminoglycoside O-nucleotidyltransferase ANT(4')-Ia	KANAMYCIN;TOBRAMYCIN
input.faa	contig164629-cat_2_4	1	891	+	aph(2'')-IIIa	31-921/921	===============	0/0	96.74	99.89	ncbi	NG_047399.1	aminoglycoside O-phosphotransferase APH(2'')-IIIa	AMIKACIN;GENTAMICIN;KANAMYCIN;TOBRAMYCIN
input.faa	contig169638-cat_1_26	1	966	+	cfxA_gen	1-966/966	===============	0/0	100	85.71	ncbi	NG_047634.1	CfxA family class A broad-spectrum beta-lactamase	BETA-LACTAM
input.faa	contig169653-cat_1_30	1	495	+	lnu(C)	1-495/495	===============	0/0	100	98.99	ncbi	NG_047924.1	lincosamide nucleotidyltransferase Lnu(C)	LINCOSAMIDE
input.faa	contig170271-cat_1_29	1	966	+	cfxA_gen	1-966/966	===============	0/0	100	85.71	ncbi	NG_047634.1	CfxA family class A broad-spectrum beta-lactamase	BETA-LACTAM
input.faa	contig173964-cat_1_2	1	735	+	erm(Y)	1-735/735	===============	0/0	100	96.33	ncbi	NG_047855.1	23S rRNA (adenine(2058)-N(6))-methyltransferase Erm(Y)	MACROLIDE
input.faa	contig175431-cat_1_6	1	735	+	erm(Y)	1-735/735	===============	0/0	100	96.33	ncbi	NG_047855.1	23S rRNA (adenine(2058)-N(6))-methyltransferase Erm(Y)	MACROLIDE
input.faa	contig180079-cat_1_5	1	735	+	erm(Y)	1-735/735	===============	0/0	100	96.05	ncbi	NG_047855.1	23S rRNA (adenine(2058)-N(6))-methyltransferase Erm(Y)	MACROLIDE
input.faa	contig180339-cat_1_7	1	735	+	erm(Y)	1-735/735	===============	0/0	100	96.33	ncbi	NG_047855.1	23S rRNA (adenine(2058)-N(6))-methyltransferase Erm(Y)	MACROLIDE
input.faa	contig182535-cat_1_53	1	513	+	lnu(AN2)	1-513/513	===============	0/0	100	100	ncbi	NG_047920.1	lincosamide nucleotidyltransferase Lnu(AN2)	LINCOSAMIDE
input.faa	contig182535-cat_1_54	1	1206	+	mef(En2)	1-1206/1206	===============	0/0	100	99.83	ncbi	NG_047980.1	macrolide efflux MFS transporter Mef(En2)	MACROLIDE
input.faa	contig195238-cat_2_1	1	864	+	ant(6)-Ia	1-864/864	===============	0/0	100	100	ncbi	NG_050582.1	aminoglycoside nucleotidyltransferase ANT(6)-Ia	STREPTOMYCIN
input.faa	contig201169-cat_1_7	1	1920	+	tet(W)	1-1920/1920	===============	0/0	100	99.9	ncbi	NG_048291.1	tetracycline resistance ribosomal protection protein Tet(W)	TETRACYCLINE
input.faa	contig203701-cat_2_14	1	735	+	erm(B)	1-735/738	===============	0/0	99.59	99.86	ncbi	NG_047798.1	23S rRNA (adenine(2058)-N(6))-methyltransferase Erm(B)	MACROLIDE
input.faa	contig205438-cat_2_35	1	498	+	dfrG	1-498/498	===============	0/0	100	99.6	ncbi	NG_047756.1	trimethoprim-resistant dihydrofolate reductase DfrG	TRIMETHOPRIM
input.faa	contig206062-cat_2_36	1	483	+	dfrG	1-483/498	===============	0/0	96.99	100	ncbi	NG_047756.1	trimethoprim-resistant dihydrofolate reductase DfrG	TRIMETHOPRIM
input.faa	contig210475-cat_1_10	1	1218	+	mef(A)	1-1218/1218	===============	0/0	100	98.44	ncbi	NG_047977.1	macrolide efflux MFS transporter Mef(A)	MACROLIDE
input.faa	contig210475-cat_1_11	1	1451	+	msr(D)	1-1451/1464	===============	0/0	99.11	96.55	ncbi	NG_048006.1	ABC-F type ribosomal protection protein Msr(D)	MACROLIDE
input.faa	contig210870-cat_1_1	1	1281	+	msr(D)	1-1281/1464	===============	0/0	87.5	97.66	ncbi	NG_048006.1	ABC-F type ribosomal protection protein Msr(D)	MACROLIDE
input.faa	contig210870-cat_1_2	1	1218	+	mef(A)	1-1218/1218	===============	0/0	100	98.52	ncbi	NG_047977.1	macrolide efflux MFS transporter Mef(A)	MACROLIDE
input.faa	contig212127-cat_1_8	1	1218	+	mef(A)	1-1218/1227	===============	0/0	99.27	96.8	ncbi	NG_047970.1	macrolide efflux MFS transporter Mef(A)	MACROLIDE
input.faa	contig212955-cat_1_7	1	1218	+	mef(A)	1-1218/1218	===============	0/0	100	98.52	ncbi	NG_047977.1	macrolide efflux MFS transporter Mef(A)	MACROLIDE
input.faa	contig214692-cat_1_2	1	1218	+	mef(A)	1-1218/1218	===============	0/0	100	98.52	ncbi	NG_047977.1	macrolide efflux MFS transporter Mef(A)	MACROLIDE
input.faa	contig216042-cat_1_1	1	735	+	erm(G)	1-735/735	===============	0/0	100	100	ncbi	NG_047827.1	23S rRNA (adenine(2058)-N(6))-methyltransferase Erm(G)	MACROLIDE
input.faa	contig216042-cat_1_4	1	1464	+	msr(D)	1-1464/1464	===============	0/0	100	97.61	ncbi	NG_048006.1	ABC-F type ribosomal protection protein Msr(D)	MACROLIDE
input.faa	contig216042-cat_1_5	1	1218	+	mef(A)	1-1218/1218	===============	0/0	100	98.52	ncbi	NG_047977.1	macrolide efflux MFS transporter Mef(A)	MACROLIDE
input.faa	contig220698-cat_1_13	1	1218	+	mef(A)	1-1218/1218	===============	0/0	100	98.52	ncbi	NG_047977.1	macrolide efflux MFS transporter Mef(A)	MACROLIDE
input.faa	contig220698-cat_1_14	1	1464	+	msr(D)	1-1464/1464	===============	0/0	100	97.61	ncbi	NG_048006.1	ABC-F type ribosomal protection protein Msr(D)	MACROLIDE
input.faa	contig230278-cat_2_5	97	896	+	erm(F)	1-800/801	===============	0/0	99.88	95.12	ncbi	NG_047825.1	23S rRNA (adenine(2058)-N(6))-methyltransferase Erm(F)	MACROLIDE
input.faa	contig231134-cat_2_8	97	896	+	erm(F)	1-800/801	===============	0/0	99.88	95.12	ncbi	NG_047825.1	23S rRNA (adenine(2058)-N(6))-methyltransferase Erm(F)	MACROLIDE
input.faa	contig231458-cat_1_5	1	1075	+	cfr(C)	1-1075/1140	===============	0/0	94.3	99.07	ncbi	NG_060579.1	23S rRNA (adenine(2503)-C(8))-methyltransferase Cfr(C)	LINCOSAMIDE;MACROLIDE;STREPTOGRAMIN
input.faa	contig233597-cat_1_1	1	1920	+	tet(Q)	7-1926/1926	===============	0/0	99.69	98.91	ncbi	NG_048270.1	tetracycline resistance ribosomal protection protein Tet(Q)	TETRACYCLINE
input.faa	contig233597-cat_1_9	97	896	+	erm(F)	1-800/801	===============	0/0	99.88	95.12	ncbi	NG_047825.1	23S rRNA (adenine(2058)-N(6))-methyltransferase Erm(F)	MACROLIDE
input.faa	contig234039-cat_2_1	97	896	+	erm(F)	1-800/801	===============	0/0	99.88	95.12	ncbi	NG_047825.1	23S rRNA (adenine(2058)-N(6))-methyltransferase Erm(F)	MACROLIDE
input.faa	contig234842-cat_1_18	1	972	+	cfr(C)	1-972/1140	===============	0/0	85.26	99.79	ncbi	NG_060579.1	23S rRNA (adenine(2503)-C(8))-methyltransferase Cfr(C)	LINCOSAMIDE;MACROLIDE;STREPTOGRAMIN
input.faa	contig235084-cat_2_8	97	798	+	erm(F)	1-702/801	===============	0/0	87.64	95.3	ncbi	NG_047825.1	23S rRNA (adenine(2058)-N(6))-methyltransferase Erm(F)	MACROLIDE
input.faa	contig239987-cat_1_4	1	840	+	sul1	1-840/840	===============	0/0	100	100	ncbi	NG_048082.1	sulfonamide-resistant dihydropteroate synthase Sul1	SULFONAMIDE
input.faa	contig239987-cat_1_6	1	780	+	aadA2	13-792/792	===============	0/0	98.48	100	ncbi	NG_051846.1	ANT(3'')-Ia family aminoglycoside nucleotidyltransferase AadA2	STREPTOMYCIN
input.faa	contig241807-cat_1_1	1	855	+	erm(X)	1-855/855	===============	0/0	100	96.96	ncbi	NG_047853.1	23S rRNA (adenine(2058)-N(6))-methyltransferase Erm(X)	MACROLIDE
input.faa	contig244222-cat_1_1	1	855	+	erm(X)	1-855/855	===============	0/0	100	96.96	ncbi	NG_047853.1	23S rRNA (adenine(2058)-N(6))-methyltransferase Erm(X)	MACROLIDE
input.faa	contig244825-cat_1_1	1	855	+	erm(X)	1-855/855	===============	0/0	100	96.96	ncbi	NG_047853.1	23S rRNA (adenine(2058)-N(6))-methyltransferase Erm(X)	MACROLIDE
input.faa	contig246052-cat_1_17	1	855	+	erm(X)	1-855/855	===============	0/0	100	96.96	ncbi	NG_047853.1	23S rRNA (adenine(2058)-N(6))-methyltransferase Erm(X)	MACROLIDE
input.faa	contig246204-cat_1_1	1	855	+	erm(X)	1-855/855	===============	0/0	100	96.96	ncbi	NG_047853.1	23S rRNA (adenine(2058)-N(6))-methyltransferase Erm(X)	MACROLIDE
input.faa	contig246318-cat_1_1	1	855	+	erm(X)	1-855/855	===============	0/0	100	96.96	ncbi	NG_047853.1	23S rRNA (adenine(2058)-N(6))-methyltransferase Erm(X)	MACROLIDE
input.faa	contig246478-cat_1_1	1	855	+	erm(X)	1-855/855	===============	0/0	100	96.96	ncbi	NG_047853.1	23S rRNA (adenine(2058)-N(6))-methyltransferase Erm(X)	MACROLIDE
input.faa	contig246486-cat_1_1	1	855	+	erm(X)	1-855/855	===============	0/0	100	96.96	ncbi	NG_047853.1	23S rRNA (adenine(2058)-N(6))-methyltransferase Erm(X)	MACROLIDE
input.faa	contig246586-cat_1_1	1	855	+	erm(X)	1-855/855	===============	0/0	100	96.96	ncbi	NG_047853.1	23S rRNA (adenine(2058)-N(6))-methyltransferase Erm(X)	MACROLIDE
input.faa	contig246605-cat_1_1	1	855	+	erm(X)	1-855/855	===============	0/0	100	96.96	ncbi	NG_047853.1	23S rRNA (adenine(2058)-N(6))-methyltransferase Erm(X)	MACROLIDE
input.faa	contig246643-cat_1_1	1	855	+	erm(X)	1-855/855	===============	0/0	100	96.96	ncbi	NG_047853.1	23S rRNA (adenine(2058)-N(6))-methyltransferase Erm(X)	MACROLIDE
input.faa	contig246824-cat_1_1	1	855	+	erm(X)	1-855/855	===============	0/0	100	96.96	ncbi	NG_047853.1	23S rRNA (adenine(2058)-N(6))-methyltransferase Erm(X)	MACROLIDE
input.faa	contig246911-cat_1_1	1	855	+	erm(X)	1-855/855	===============	0/0	100	96.96	ncbi	NG_047853.1	23S rRNA (adenine(2058)-N(6))-methyltransferase Erm(X)	MACROLIDE
input.faa	contig249664-cat_1_6	1	780	+	aadA2	13-792/792	===============	0/0	98.48	100	ncbi	NG_051846.1	ANT(3'')-Ia family aminoglycoside nucleotidyltransferase AadA2	STREPTOMYCIN
input.faa	contig249664-cat_1_8	1	840	+	sul1	1-840/840	===============	0/0	100	100	ncbi	NG_048082.1	sulfonamide-resistant dihydropteroate synthase Sul1	SULFONAMIDE
input.faa	contig250992-cat_1_10	1	495	+	lnu(D)	1-495/495	===============	0/0	100	83.84	ncbi	NG_047925.1	lincosamide nucleotidyltransferase Lnu(D)	LINCOSAMIDE
input.faa	contig251069-cat_1_2	1	900	+	aph(2'')-IIa	1-900/900	===============	0/0	100	84.89	ncbi	NG_047400.1	aminoglycoside O-phosphotransferase APH(2'')-IIa	AMIKACIN;GENTAMICIN;KANAMYCIN;TOBRAMYCIN
input.faa	contig251069-cat_1_3	1	537	+	aac(6')-Im	1-537/537	===============	0/0	100	91.06	ncbi	NG_052222.1	aminoglycoside N-acetyltransferase AAC(6')-Im	AMINOGLYCOSIDE
input.faa	contig253142-cat_1_1	1	855	+	erm(X)	1-855/855	===============	0/0	100	96.96	ncbi	NG_047853.1	23S rRNA (adenine(2058)-N(6))-methyltransferase Erm(X)	MACROLIDE
input.faa	contig254216-cat_1_1	1	855	+	erm(X)	1-855/855	===============	0/0	100	96.96	ncbi	NG_047853.1	23S rRNA (adenine(2058)-N(6))-methyltransferase Erm(X)	MACROLIDE
input.faa	contig254280-cat_1_1	1	855	+	erm(X)	1-855/855	===============	0/0	100	96.96	ncbi	NG_047853.1	23S rRNA (adenine(2058)-N(6))-methyltransferase Erm(X)	MACROLIDE
input.faa	contig254687-cat_1_1	1	855	+	erm(X)	1-855/855	===============	0/0	100	96.96	ncbi	NG_047853.1	23S rRNA (adenine(2058)-N(6))-methyltransferase Erm(X)	MACROLIDE
input.faa	contig254699-cat_1_1	1	855	+	erm(X)	1-855/855	===============	0/0	100	96.96	ncbi	NG_047853.1	23S rRNA (adenine(2058)-N(6))-methyltransferase Erm(X)	MACROLIDE
input.faa	contig254862-cat_1_1	1	855	+	erm(X)	1-855/855	===============	0/0	100	96.96	ncbi	NG_047853.1	23S rRNA (adenine(2058)-N(6))-methyltransferase Erm(X)	MACROLIDE
input.faa	contig254877-cat_1_1	1	855	+	erm(X)	1-855/855	===============	0/0	100	96.96	ncbi	NG_047853.1	23S rRNA (adenine(2058)-N(6))-methyltransferase Erm(X)	MACROLIDE
input.faa	contig254970-cat_1_1	1	855	+	erm(X)	1-855/855	===============	0/0	100	96.96	ncbi	NG_047853.1	23S rRNA (adenine(2058)-N(6))-methyltransferase Erm(X)	MACROLIDE
input.faa	contig255535-cat_1_6	1	1920	+	tet(W)	1-1920/1920	===============	0/0	100	99.95	ncbi	NG_048291.1	tetracycline resistance ribosomal protection protein Tet(W)	TETRACYCLINE
input.faa	contig256862-cat_1_2	1	900	+	aph(2'')-IIa	1-900/900	===============	0/0	100	84.89	ncbi	NG_047400.1	aminoglycoside O-phosphotransferase APH(2'')-IIa	AMIKACIN;GENTAMICIN;KANAMYCIN;TOBRAMYCIN
input.faa	contig256862-cat_1_3	1	537	+	aac(6')-Im	1-537/537	===============	0/0	100	91.06	ncbi	NG_052222.1	aminoglycoside N-acetyltransferase AAC(6')-Im	AMINOGLYCOSIDE
input.faa	contig258480-cat_1_6	1	705	+	aph(3')-VIIa	49-753/753	===============	0/0	93.63	84.68	ncbi	NG_047447.1	aminoglycoside O-phosphotransferase APH(3')-VIIa	AMIKACIN;KANAMYCIN
input.faa	contig263647-cat_1_17	1	855	+	erm(X)	1-855/855	===============	0/0	100	96.96	ncbi	NG_047853.1	23S rRNA (adenine(2058)-N(6))-methyltransferase Erm(X)	MACROLIDE
input.faa	contig263751-cat_1_1	1	855	+	erm(X)	1-855/855	===============	0/0	100	96.96	ncbi	NG_047853.1	23S rRNA (adenine(2058)-N(6))-methyltransferase Erm(X)	MACROLIDE
input.faa	contig272900-cat_1_1	1	855	+	blaACI-1	1-855/855	===============	0/0	100	99.77	ncbi	NG_048596.1	class A extended-spectrum beta-lactamase ACI-1	CEPHALOSPORIN
input.faa	contig275483-cat_1_1	1	1218	+	mef(A)	1-1218/1227	===============	0/0	99.27	96.31	ncbi	NG_047973.1	macrolide efflux MFS transporter Mef(A)	MACROLIDE
input.faa	contig275483-cat_1_2	1	1246	+	msr(D)	1-1246/1464	===============	0/0	85.11	97.03	ncbi	NG_048006.1	ABC-F type ribosomal protection protein Msr(D)	MACROLIDE
input.faa	contig278235-cat_1_75	1	855	+	blaACI-1	1-855/855	===============	0/0	100	99.77	ncbi	NG_048596.1	class A extended-spectrum beta-lactamase ACI-1	CEPHALOSPORIN
input.faa	contig280250-cat_1_20	1	867	+	aadE	1-867/867	===============	0/0	100	100	ncbi	NG_047378.1	aminoglycoside 6-adenylyltransferase AadE	STREPTOMYCIN
input.faa	contig294536-cat_1_10	1	495	+	lnu(D)	1-495/495	===============	0/0	100	83.84	ncbi	NG_047925.1	lincosamide nucleotidyltransferase Lnu(D)	LINCOSAMIDE
input.faa	contig301070-cat_1_6	1	735	+	erm(G)	1-735/735	===============	0/0	100	100	ncbi	NG_047827.1	23S rRNA (adenine(2058)-N(6))-methyltransferase Erm(G)	MACROLIDE
