# Supplementary material for: Global Characterization of the Avian Gut Virome Reveals Extensive Viral Diversity and Functional Implications
Source: Research Square preprint supplement (doi:10.21203/rs.3.rs-6913311/v1), 2025-10-16
Supplement: Supplementary file 8 [file ba5d91a43a4bcb9e4429710d.xlsx]

## Sheet: dramv_ARG_card
Supplementary Table S6: The detail information of ARGs of avian gut virome identified in CARD databases.
	SEQUENCE	START	END	STRAND	GENE	COVERAGE	COVERAGE_MAP	GAPS	%COVERAGE	%IDENTITY	DATABASE	ACCESSION	PRODUCT	RESISTANCE
input.faa	contig002358-cat_1_42	1	651	+	Vibrio_anguillarum_chloramphenicol_acetyltransferase	1-651/651	===============	0/0	100	95.85	card	S48276.1:478-1129	A chloramphenicol resistance determinant described in a Vibrio anguillarum plasmid sequence	phenicol
input.faa	contig008023-cat_1_1	1	727	+	ErmB	10-736/747	===============	0/0	97.32	99.59	card	AF242872.1:2131-2878	ErmB confers the MLSb phenotype. Similar to ErmC expression of ErmB is inducible by erythromycin. The leader peptide causes attenuation of the mRNA and stabilizes the structure preventing further translation. When erythromycin is present it binds the leader peptide causing a change in conformation allowing for the expression of ErmB.	lincosamide;macrolide;streptogramin
input.faa	contig024172-cat_1_3	1	906	+	APH(2'')-IVa	1-906/906	===============	0/0	100	100	card	AF016483:0-906	APH(2'')-IVa is a chromosomal-encoded aminoglycoside phosphotransferase in E. casseliflavus	aminoglycoside
input.faa	contig030040-cat_1_35	1	722	+	baeR	1-722/723	===============	0/0	99.86	96.81	card	AP009048.1:2166412-2167135	BaeR is a response regulator that promotes the expression of MdtABC and AcrD efflux complexes.	aminocoumarin;aminoglycoside
input.faa	contig030242-cat_2_11	1	333	+	Escherichia_coli_emrE	1-333/333	===============	0/0	100	99.7	card	Z11877.1:485-818	Member of the small MDR (multidrug resistance) family of transporters; in Escherichia coli this protein provides resistance against a number of positively charged compounds including ethidium bromide and erythromycin; proton-dependent secondary transporter which exchanges protons for compound translocation	macrolide
input.faa	contig035293-cat_1_25	1	966	+	CfxA4	1-966/966	===============	0/0	100	100	card	AY769933:0-966	cfxA4 beta-lactamase is a class A beta-lactamase found in Bacteroides fragilis	cephamycin
input.faa	contig058908-cat_1_3	1	651	+	Streptococcus_suis_chloramphenicol_acetyltransferase	1-651/651	===============	0/0	100	96.47	card	AB080798.1:2658-3309	A chloramphenicol resistance determinant described in Streptococcus suis.	phenicol
input.faa	contig059339-cat_2_5	1	333	+	Escherichia_coli_emrE	1-333/333	===============	0/0	100	99.7	card	Z11877.1:485-818	Member of the small MDR (multidrug resistance) family of transporters; in Escherichia coli this protein provides resistance against a number of positively charged compounds including ethidium bromide and erythromycin; proton-dependent secondary transporter which exchanges protons for compound translocation	macrolide
input.faa	contig066981-cat_1_9	1	735	+	ErmG	1-735/735	===============	0/0	100	99.59	card	L42817:201-936	ErmG is a rRNA adenine N-6-methyltransferase that protects the ribosome from inactivation due to antibiotic binding.	lincosamide;macrolide;streptogramin
input.faa	contig070200-cat_1_1	1	441	+	lnuC	1-441/495	==============.	0/0	89.09	99.09	card	AY928180:0-495	lnuC is a transposon-mediated nucleotidyltransferase found in Streptococcus agalactiae	lincosamide
input.faa	contig077649-cat_1_16	1	735	+	ErmG	1-735/735	===============	0/0	100	99.46	card	L42817:201-936	ErmG is a rRNA adenine N-6-methyltransferase that protects the ribosome from inactivation due to antibiotic binding.	lincosamide;macrolide;streptogramin
input.faa	contig078096-cat_2_10	1	1035	+	cfrC	1-1035/1035	===============	0/0	100	96.72	card	AM412317.1:3036527-3035492	A cfr-like 23S rRNA methyltransferase shown to confer resistance to linezolid and phenicol antibiotics including florfenicol and chloramphenicol in Clostridium.	lincosamide;macrolide;oxazolidinone;phenicol;streptogramin
input.faa	contig090873-cat_1_1	1	495	+	lnuC	1-495/495	===============	0/0	100	98.99	card	AY928180:0-495	lnuC is a transposon-mediated nucleotidyltransferase found in Streptococcus agalactiae	lincosamide
input.faa	contig096448-cat_2_6	1	735	+	ErmG	1-735/735	===============	0/0	100	99.59	card	L42817:201-936	ErmG is a rRNA adenine N-6-methyltransferase that protects the ribosome from inactivation due to antibiotic binding.	lincosamide;macrolide;streptogramin
input.faa	contig099669-cat_1_2	23	706	+	ErmB	53-736/747	.==============	0/0	91.57	99.56	card	AF242872.1:2131-2878	ErmB confers the MLSb phenotype. Similar to ErmC expression of ErmB is inducible by erythromycin. The leader peptide causes attenuation of the mRNA and stabilizes the structure preventing further translation. When erythromycin is present it binds the leader peptide causing a change in conformation allowing for the expression of ErmB.	lincosamide;macrolide;streptogramin
input.faa	contig103644-cat_1_3	1	333	+	Escherichia_coli_emrE	1-333/333	===============	0/0	100	98.8	card	Z11877.1:485-818	Member of the small MDR (multidrug resistance) family of transporters; in Escherichia coli this protein provides resistance against a number of positively charged compounds including ethidium bromide and erythromycin; proton-dependent secondary transporter which exchanges protons for compound translocation	macrolide
input.faa	contig113615-cat_1_1	1	795	+	APH(3')-IIIa	1-795/795	===============	0/0	100	100	card	CP004067:52914-53709	APH(3')-IIIa is a plasmid-encoded aminoglycoside phosphotransferase in S. aureus and Enterococcus spp.	aminoglycoside
input.faa	contig115649-cat_2_9	1	735	+	ErmG	1-735/735	===============	0/0	100	99.59	card	L42817:201-936	ErmG is a rRNA adenine N-6-methyltransferase that protects the ribosome from inactivation due to antibiotic binding.	lincosamide;macrolide;streptogramin
input.faa	contig117182-cat_2_7	1	735	+	ErmG	1-735/735	===============	0/0	100	99.59	card	L42817:201-936	ErmG is a rRNA adenine N-6-methyltransferase that protects the ribosome from inactivation due to antibiotic binding.	lincosamide;macrolide;streptogramin
input.faa	contig123284-cat_1_2	1	855	+	ErmX	1-855/855	========/======	45690	99.88	99.18	card	M36726.1:295-1150	ErmX is a rRNA methyltransferase that protects the ribosome from inactivation due to antibiotic binding.	lincosamide;macrolide;streptogramin
input.faa	contig127316-cat_2_3	1	333	+	Escherichia_coli_emrE	1-333/333	===============	0/0	100	100	card	Z11877.1:485-818	Member of the small MDR (multidrug resistance) family of transporters; in Escherichia coli this protein provides resistance against a number of positively charged compounds including ethidium bromide and erythromycin; proton-dependent secondary transporter which exchanges protons for compound translocation	macrolide
input.faa	contig129654-cat_1_1	1	1374	+	cpxA	1-1374/1374	===============	0/0	100	98.98	card	BA000007.3:4905062-4903688	CpxA is a membrane-localized sensor kinase that is activated by envelope stress. It starts a kinase cascade that activates CpxR which promotes efflux complex expression.	aminocoumarin;aminoglycoside
input.faa	contig130897-cat_1_1	1	1374	+	cpxA	1-1374/1374	===============	0/0	100	98.98	card	BA000007.3:4905062-4903688	CpxA is a membrane-localized sensor kinase that is activated by envelope stress. It starts a kinase cascade that activates CpxR which promotes efflux complex expression.	aminocoumarin;aminoglycoside
input.faa	contig132094-cat_2_15	1	333	+	Escherichia_coli_emrE	1-333/333	===============	0/0	100	98.8	card	Z11877.1:485-818	Member of the small MDR (multidrug resistance) family of transporters; in Escherichia coli this protein provides resistance against a number of positively charged compounds including ethidium bromide and erythromycin; proton-dependent secondary transporter which exchanges protons for compound translocation	macrolide
input.faa	contig135003-cat_1_60	1	1218	+	mel	1-1218/1218	===============	0/0	100	90.31	card	AF227521.1:3269-4487	Mel a homolog of MsrA is an ABC-F subfamily protein associated with macrolide resistance. It is expressed on the same operon as mefA and mefE both MFS-type efflux proteins that confer macrolide resistance.	lincosamide;macrolide;oxazolidinone;phenicol;pleuromutilin;streptogramin;tetracycline
input.faa	contig135094-cat_1_18	1	333	+	Escherichia_coli_emrE	1-333/333	===============	0/0	100	99.7	card	Z11877.1:485-818	Member of the small MDR (multidrug resistance) family of transporters; in Escherichia coli this protein provides resistance against a number of positively charged compounds including ethidium bromide and erythromycin; proton-dependent secondary transporter which exchanges protons for compound translocation	macrolide
input.faa	contig135987-cat_1_18	1	333	+	Escherichia_coli_emrE	1-333/333	===============	0/0	100	99.7	card	Z11877.1:485-818	Member of the small MDR (multidrug resistance) family of transporters; in Escherichia coli this protein provides resistance against a number of positively charged compounds including ethidium bromide and erythromycin; proton-dependent secondary transporter which exchanges protons for compound translocation	macrolide
input.faa	contig136002-cat_1_11	1	333	+	Escherichia_coli_emrE	1-333/333	===============	0/0	100	99.7	card	Z11877.1:485-818	Member of the small MDR (multidrug resistance) family of transporters; in Escherichia coli this protein provides resistance against a number of positively charged compounds including ethidium bromide and erythromycin; proton-dependent secondary transporter which exchanges protons for compound translocation	macrolide
input.faa	contig136014-cat_1_1	1	333	+	Escherichia_coli_emrE	1-333/333	===============	0/0	100	99.7	card	Z11877.1:485-818	Member of the small MDR (multidrug resistance) family of transporters; in Escherichia coli this protein provides resistance against a number of positively charged compounds including ethidium bromide and erythromycin; proton-dependent secondary transporter which exchanges protons for compound translocation	macrolide
input.faa	contig136061-cat_1_14	1	333	+	Escherichia_coli_emrE	1-333/333	===============	0/0	100	99.7	card	Z11877.1:485-818	Member of the small MDR (multidrug resistance) family of transporters; in Escherichia coli this protein provides resistance against a number of positively charged compounds including ethidium bromide and erythromycin; proton-dependent secondary transporter which exchanges protons for compound translocation	macrolide
input.faa	contig136094-cat_1_18	1	333	+	Escherichia_coli_emrE	1-333/333	===============	0/0	100	99.7	card	Z11877.1:485-818	Member of the small MDR (multidrug resistance) family of transporters; in Escherichia coli this protein provides resistance against a number of positively charged compounds including ethidium bromide and erythromycin; proton-dependent secondary transporter which exchanges protons for compound translocation	macrolide
input.faa	contig136695-cat_1_2	1	966	+	CfxA4	1-966/966	===============	0/0	100	100	card	AY769933:0-966	cfxA4 beta-lactamase is a class A beta-lactamase found in Bacteroides fragilis	cephamycin
input.faa	contig138526-cat_1_11	1	735	+	ErmG	1-735/735	===============	0/0	100	99.59	card	L42817:201-936	ErmG is a rRNA adenine N-6-methyltransferase that protects the ribosome from inactivation due to antibiotic binding.	lincosamide;macrolide;streptogramin
input.faa	contig138847-cat_1_12	1	333	+	Escherichia_coli_emrE	1-333/333	===============	0/0	100	99.1	card	Z11877.1:485-818	Member of the small MDR (multidrug resistance) family of transporters; in Escherichia coli this protein provides resistance against a number of positively charged compounds including ethidium bromide and erythromycin; proton-dependent secondary transporter which exchanges protons for compound translocation	macrolide
input.faa	contig140318-cat_1_17	1	333	+	Escherichia_coli_emrE	1-333/333	===============	0/0	100	99.7	card	Z11877.1:485-818	Member of the small MDR (multidrug resistance) family of transporters; in Escherichia coli this protein provides resistance against a number of positively charged compounds including ethidium bromide and erythromycin; proton-dependent secondary transporter which exchanges protons for compound translocation	macrolide
input.faa	contig140483-cat_1_7	10	771	+	ANT(4')-Ib	1-762/762	===============	0/0	100	95.67	card	GQ900432.1:27499-26737	Kanamycin nucleotidyltransferase sequence from Staphylococcus aureus plasmid. Confers resistance to kanamycin neomycin and other aminoglycosides	aminoglycoside
input.faa	contig141689-cat_1_65	1	855	+	ErmX	1-855/855	========/======	45690	99.88	99.18	card	M36726.1:295-1150	ErmX is a rRNA methyltransferase that protects the ribosome from inactivation due to antibiotic binding.	lincosamide;macrolide;streptogramin
input.faa	contig142489-cat_1_1	1	855	+	ErmX	1-855/855	========/======	45690	99.88	99.18	card	M36726.1:295-1150	ErmX is a rRNA methyltransferase that protects the ribosome from inactivation due to antibiotic binding.	lincosamide;macrolide;streptogramin
input.faa	contig142621-cat_1_2	1	855	+	ErmX	1-855/855	========/======	45690	99.88	99.18	card	M36726.1:295-1150	ErmX is a rRNA methyltransferase that protects the ribosome from inactivation due to antibiotic binding.	lincosamide;macrolide;streptogramin
input.faa	contig142843-cat_1_20	1	333	+	Escherichia_coli_emrE	1-333/333	===============	0/0	100	99.4	card	Z11877.1:485-818	Member of the small MDR (multidrug resistance) family of transporters; in Escherichia coli this protein provides resistance against a number of positively charged compounds including ethidium bromide and erythromycin; proton-dependent secondary transporter which exchanges protons for compound translocation	macrolide
input.faa	contig146343-cat_1_2	1	333	+	Escherichia_coli_emrE	1-333/333	===============	0/0	100	98.8	card	Z11877.1:485-818	Member of the small MDR (multidrug resistance) family of transporters; in Escherichia coli this protein provides resistance against a number of positively charged compounds including ethidium bromide and erythromycin; proton-dependent secondary transporter which exchanges protons for compound translocation	macrolide
input.faa	contig147560-cat_1_9	1	333	+	Escherichia_coli_emrE	1-333/333	===============	0/0	100	99.4	card	Z11877.1:485-818	Member of the small MDR (multidrug resistance) family of transporters; in Escherichia coli this protein provides resistance against a number of positively charged compounds including ethidium bromide and erythromycin; proton-dependent secondary transporter which exchanges protons for compound translocation	macrolide
input.faa	contig148760-cat_2_9	1	333	+	Escherichia_coli_emrE	1-333/333	===============	0/0	100	99.7	card	Z11877.1:485-818	Member of the small MDR (multidrug resistance) family of transporters; in Escherichia coli this protein provides resistance against a number of positively charged compounds including ethidium bromide and erythromycin; proton-dependent secondary transporter which exchanges protons for compound translocation	macrolide
input.faa	contig149138-cat_2_3	1	333	+	Escherichia_coli_emrE	1-333/333	===============	0/0	100	100	card	Z11877.1:485-818	Member of the small MDR (multidrug resistance) family of transporters; in Escherichia coli this protein provides resistance against a number of positively charged compounds including ethidium bromide and erythromycin; proton-dependent secondary transporter which exchanges protons for compound translocation	macrolide
input.faa	contig157494-cat_1_2	1	501	+	LnuP	1-501/501	===============	0/0	100	100	card	FJ589781.1:1302-1803	LnuP is a lincosamide nucleotidyltransferase major efflux facilitator	lincosamide
input.faa	contig160935-cat_1_15	1	333	+	Escherichia_coli_emrE	1-333/333	===============	0/0	100	99.4	card	Z11877.1:485-818	Member of the small MDR (multidrug resistance) family of transporters; in Escherichia coli this protein provides resistance against a number of positively charged compounds including ethidium bromide and erythromycin; proton-dependent secondary transporter which exchanges protons for compound translocation	macrolide
input.faa	contig161695-cat_1_7	10	771	+	ANT(4')-Ib	1-762/762	===============	0/0	100	95.67	card	GQ900432.1:27499-26737	Kanamycin nucleotidyltransferase sequence from Staphylococcus aureus plasmid. Confers resistance to kanamycin neomycin and other aminoglycosides	aminoglycoside
input.faa	contig161777-cat_2_7	1	306	+	Escherichia_coli_emrE	1-305/333	========/=====.	45658	91.59	98.69	card	Z11877.1:485-818	Member of the small MDR (multidrug resistance) family of transporters; in Escherichia coli this protein provides resistance against a number of positively charged compounds including ethidium bromide and erythromycin; proton-dependent secondary transporter which exchanges protons for compound translocation	macrolide
input.faa	contig163317-cat_2_11	1	333	+	Escherichia_coli_emrE	1-333/333	===============	0/0	100	99.7	card	Z11877.1:485-818	Member of the small MDR (multidrug resistance) family of transporters; in Escherichia coli this protein provides resistance against a number of positively charged compounds including ethidium bromide and erythromycin; proton-dependent secondary transporter which exchanges protons for compound translocation	macrolide
input.faa	contig164629-cat_2_4	1	891	+	APH(2'')-IIIa	31-921/921	===============	0/0	96.74	99.89	card	U51479:0-921	APH(2'')-IIIa is a plasmid-encoded aminoglycoside phosphotransferase in Enterococcus gallinarum	aminoglycoside
input.faa	contig168215-cat_2_4	1	333	+	Escherichia_coli_emrE	1-333/333	===============	0/0	100	99.4	card	Z11877.1:485-818	Member of the small MDR (multidrug resistance) family of transporters; in Escherichia coli this protein provides resistance against a number of positively charged compounds including ethidium bromide and erythromycin; proton-dependent secondary transporter which exchanges protons for compound translocation	macrolide
input.faa	contig169638-cat_1_26	1	966	+	CfxA2	1-966/966	===============	0/0	100	85.71	card	AF118110.1:1037-71	cfxA2 beta-lactamase is a class A beta-lactamase found in Prevotella intermedia	cephamycin
input.faa	contig169653-cat_1_30	1	495	+	lnuC	1-495/495	===============	0/0	100	98.99	card	AY928180:0-495	lnuC is a transposon-mediated nucleotidyltransferase found in Streptococcus agalactiae	lincosamide
input.faa	contig170024-cat_1_11	1	333	+	Escherichia_coli_emrE	1-333/333	===============	0/0	100	98.8	card	Z11877.1:485-818	Member of the small MDR (multidrug resistance) family of transporters; in Escherichia coli this protein provides resistance against a number of positively charged compounds including ethidium bromide and erythromycin; proton-dependent secondary transporter which exchanges protons for compound translocation	macrolide
input.faa	contig170271-cat_1_29	1	966	+	CfxA2	1-966/966	===============	0/0	100	85.71	card	AF118110.1:1037-71	cfxA2 beta-lactamase is a class A beta-lactamase found in Prevotella intermedia	cephamycin
input.faa	contig170273-cat_1_1	1	1374	+	cpxA	1-1374/1374	===============	0/0	100	98.84	card	BA000007.3:4905062-4903688	CpxA is a membrane-localized sensor kinase that is activated by envelope stress. It starts a kinase cascade that activates CpxR which promotes efflux complex expression.	aminocoumarin;aminoglycoside
input.faa	contig170535-cat_1_4	1	333	+	Escherichia_coli_emrE	1-333/333	===============	0/0	100	99.7	card	Z11877.1:485-818	Member of the small MDR (multidrug resistance) family of transporters; in Escherichia coli this protein provides resistance against a number of positively charged compounds including ethidium bromide and erythromycin; proton-dependent secondary transporter which exchanges protons for compound translocation	macrolide
input.faa	contig170838-cat_2_2	1	333	+	Escherichia_coli_emrE	1-333/333	===============	0/0	100	99.1	card	Z11877.1:485-818	Member of the small MDR (multidrug resistance) family of transporters; in Escherichia coli this protein provides resistance against a number of positively charged compounds including ethidium bromide and erythromycin; proton-dependent secondary transporter which exchanges protons for compound translocation	macrolide
input.faa	contig173191-cat_2_5	1	333	+	Escherichia_coli_emrE	1-333/333	===============	0/0	100	99.4	card	Z11877.1:485-818	Member of the small MDR (multidrug resistance) family of transporters; in Escherichia coli this protein provides resistance against a number of positively charged compounds including ethidium bromide and erythromycin; proton-dependent secondary transporter which exchanges protons for compound translocation	macrolide
input.faa	contig173518-cat_2_3	1	333	+	Escherichia_coli_emrE	1-333/333	===============	0/0	100	100	card	Z11877.1:485-818	Member of the small MDR (multidrug resistance) family of transporters; in Escherichia coli this protein provides resistance against a number of positively charged compounds including ethidium bromide and erythromycin; proton-dependent secondary transporter which exchanges protons for compound translocation	macrolide
input.faa	contig173765-cat_2_5	1	333	+	Escherichia_coli_emrE	1-333/333	===============	0/0	100	100	card	Z11877.1:485-818	Member of the small MDR (multidrug resistance) family of transporters; in Escherichia coli this protein provides resistance against a number of positively charged compounds including ethidium bromide and erythromycin; proton-dependent secondary transporter which exchanges protons for compound translocation	macrolide
input.faa	contig173964-cat_1_2	1	735	+	ErmY	1-735/735	===============	0/0	100	96.33	card	AB014481:0-735	ErmY is a plasmid-mediated methyltransferase found in Staphylococcus aureus	lincosamide;macrolide;streptogramin
input.faa	contig175431-cat_1_6	1	735	+	ErmY	1-735/735	===============	0/0	100	96.33	card	AB014481:0-735	ErmY is a plasmid-mediated methyltransferase found in Staphylococcus aureus	lincosamide;macrolide;streptogramin
input.faa	contig175667-cat_2_5	1	333	+	Escherichia_coli_emrE	1-333/333	===============	0/0	100	100	card	Z11877.1:485-818	Member of the small MDR (multidrug resistance) family of transporters; in Escherichia coli this protein provides resistance against a number of positively charged compounds including ethidium bromide and erythromycin; proton-dependent secondary transporter which exchanges protons for compound translocation	macrolide
input.faa	contig177522-cat_2_16	1	333	+	Escherichia_coli_emrE	1-333/333	===============	0/0	100	98.8	card	Z11877.1:485-818	Member of the small MDR (multidrug resistance) family of transporters; in Escherichia coli this protein provides resistance against a number of positively charged compounds including ethidium bromide and erythromycin; proton-dependent secondary transporter which exchanges protons for compound translocation	macrolide
input.faa	contig180079-cat_1_5	1	735	+	ErmY	1-735/735	===============	0/0	100	96.05	card	AB014481:0-735	ErmY is a plasmid-mediated methyltransferase found in Staphylococcus aureus	lincosamide;macrolide;streptogramin
input.faa	contig180339-cat_1_7	1	735	+	ErmY	1-735/735	===============	0/0	100	96.33	card	AB014481:0-735	ErmY is a plasmid-mediated methyltransferase found in Staphylococcus aureus	lincosamide;macrolide;streptogramin
input.faa	contig182535-cat_1_54	1	1206	+	Mef(En2)	1-1206/1206	===============	0/0	100	99.83	card	AF251288.1:2000-794	NBU2-encoded resistance gene. An MefE homolog in Bacteroides species. Macrolide efflux MFS transporter	macrolide
input.faa	contig185620-cat_2_8	1	333	+	Escherichia_coli_emrE	1-333/333	===============	0/0	100	99.7	card	Z11877.1:485-818	Member of the small MDR (multidrug resistance) family of transporters; in Escherichia coli this protein provides resistance against a number of positively charged compounds including ethidium bromide and erythromycin; proton-dependent secondary transporter which exchanges protons for compound translocation	macrolide
input.faa	contig188614-cat_1_32	1	1374	+	cpxA	1-1374/1374	===============	0/0	100	98.91	card	BA000007.3:4905062-4903688	CpxA is a membrane-localized sensor kinase that is activated by envelope stress. It starts a kinase cascade that activates CpxR which promotes efflux complex expression.	aminocoumarin;aminoglycoside
input.faa	contig189168-cat_1_3	1	333	+	Escherichia_coli_emrE	1-333/333	===============	0/0	100	98.8	card	Z11877.1:485-818	Member of the small MDR (multidrug resistance) family of transporters; in Escherichia coli this protein provides resistance against a number of positively charged compounds including ethidium bromide and erythromycin; proton-dependent secondary transporter which exchanges protons for compound translocation	macrolide
input.faa	contig194225-cat_2_5	1	333	+	Escherichia_coli_emrE	1-333/333	===============	0/0	100	98.8	card	Z11877.1:485-818	Member of the small MDR (multidrug resistance) family of transporters; in Escherichia coli this protein provides resistance against a number of positively charged compounds including ethidium bromide and erythromycin; proton-dependent secondary transporter which exchanges protons for compound translocation	macrolide
input.faa	contig194832-cat_2_3	1	333	+	Escherichia_coli_emrE	1-333/333	===============	0/0	100	100	card	Z11877.1:485-818	Member of the small MDR (multidrug resistance) family of transporters; in Escherichia coli this protein provides resistance against a number of positively charged compounds including ethidium bromide and erythromycin; proton-dependent secondary transporter which exchanges protons for compound translocation	macrolide
input.faa	contig195238-cat_2_1	1	864	+	ANT(6)-Ia	1-864/864	===============	0/0	100	100	card	KF648874.1:61860-60996	ANT(6)-Ia is an aminoglycoside nucleotidyltransferase gene encoded by plasmids and chromosomes in Staphylococcus epidermidis E. faecium Streptococcus suis S. aureus E. faecalis and Streptococcus mitis	aminoglycoside
input.faa	contig196490-cat_1_8	1	333	+	Escherichia_coli_emrE	1-333/333	===============	0/0	100	100	card	Z11877.1:485-818	Member of the small MDR (multidrug resistance) family of transporters; in Escherichia coli this protein provides resistance against a number of positively charged compounds including ethidium bromide and erythromycin; proton-dependent secondary transporter which exchanges protons for compound translocation	macrolide
input.faa	contig200591-cat_2_5	1	333	+	Escherichia_coli_emrE	1-333/333	===============	0/0	100	99.1	card	Z11877.1:485-818	Member of the small MDR (multidrug resistance) family of transporters; in Escherichia coli this protein provides resistance against a number of positively charged compounds including ethidium bromide and erythromycin; proton-dependent secondary transporter which exchanges protons for compound translocation	macrolide
input.faa	contig201169-cat_1_7	1	1920	+	tetW	1-1920/1920	===============	0/0	100	98.07	card	AJ222769.3:3686-5606	TetW is a ribosomal protection protein. It is associated with both conjugative and non conjugative DNA and has been found strains of Clostridioides difficile.	tetracycline
input.faa	contig202450-cat_2_12	1	333	+	Escherichia_coli_emrE	1-333/333	===============	0/0	100	99.4	card	Z11877.1:485-818	Member of the small MDR (multidrug resistance) family of transporters; in Escherichia coli this protein provides resistance against a number of positively charged compounds including ethidium bromide and erythromycin; proton-dependent secondary transporter which exchanges protons for compound translocation	macrolide
input.faa	contig202962-cat_1_19	1	333	+	Escherichia_coli_emrE	1-333/333	===============	0/0	100	100	card	Z11877.1:485-818	Member of the small MDR (multidrug resistance) family of transporters; in Escherichia coli this protein provides resistance against a number of positively charged compounds including ethidium bromide and erythromycin; proton-dependent secondary transporter which exchanges protons for compound translocation	macrolide
input.faa	contig203553-cat_1_6	1	333	+	Escherichia_coli_emrE	1-333/333	===============	0/0	100	100	card	Z11877.1:485-818	Member of the small MDR (multidrug resistance) family of transporters; in Escherichia coli this protein provides resistance against a number of positively charged compounds including ethidium bromide and erythromycin; proton-dependent secondary transporter which exchanges protons for compound translocation	macrolide
input.faa	contig203701-cat_2_14	1	735	+	ErmB	1-735/747	===============	0/0	98.39	99.86	card	AF242872.1:2131-2878	ErmB confers the MLSb phenotype. Similar to ErmC expression of ErmB is inducible by erythromycin. The leader peptide causes attenuation of the mRNA and stabilizes the structure preventing further translation. When erythromycin is present it binds the leader peptide causing a change in conformation allowing for the expression of ErmB.	lincosamide;macrolide;streptogramin
input.faa	contig205406-cat_2_11	1	333	+	Escherichia_coli_emrE	1-333/333	===============	0/0	100	98.8	card	Z11877.1:485-818	Member of the small MDR (multidrug resistance) family of transporters; in Escherichia coli this protein provides resistance against a number of positively charged compounds including ethidium bromide and erythromycin; proton-dependent secondary transporter which exchanges protons for compound translocation	macrolide
input.faa	contig205438-cat_2_35	1	498	+	dfrG	1-498/498	===============	0/0	100	99.6	card	AB205645:1012-1510	dfrG is a plasmid-encoded dihydrofolate reductase found in Staphylococcus aureus	diaminopyrimidine
input.faa	contig206062-cat_2_36	1	483	+	dfrG	1-483/498	===============	0/0	96.99	100	card	AB205645:1012-1510	dfrG is a plasmid-encoded dihydrofolate reductase found in Staphylococcus aureus	diaminopyrimidine
input.faa	contig207310-cat_2_11	1	333	+	Escherichia_coli_emrE	1-333/333	===============	0/0	100	99.7	card	Z11877.1:485-818	Member of the small MDR (multidrug resistance) family of transporters; in Escherichia coli this protein provides resistance against a number of positively charged compounds including ethidium bromide and erythromycin; proton-dependent secondary transporter which exchanges protons for compound translocation	macrolide
input.faa	contig210475-cat_1_10	1	1218	+	mel	1-1218/1218	===============	0/0	100	91.63	card	AF227521.1:3269-4487	Mel a homolog of MsrA is an ABC-F subfamily protein associated with macrolide resistance. It is expressed on the same operon as mefA and mefE both MFS-type efflux proteins that confer macrolide resistance.	lincosamide;macrolide;oxazolidinone;phenicol;pleuromutilin;streptogramin;tetracycline
input.faa	contig210870-cat_1_2	1	1218	+	mel	1-1218/1218	===============	0/0	100	91.71	card	AF227521.1:3269-4487	Mel a homolog of MsrA is an ABC-F subfamily protein associated with macrolide resistance. It is expressed on the same operon as mefA and mefE both MFS-type efflux proteins that confer macrolide resistance.	lincosamide;macrolide;oxazolidinone;phenicol;pleuromutilin;streptogramin;tetracycline
input.faa	contig212127-cat_1_8	1	1218	+	mel	1-1218/1218	===============	0/0	100	96.22	card	AF227521.1:3269-4487	Mel a homolog of MsrA is an ABC-F subfamily protein associated with macrolide resistance. It is expressed on the same operon as mefA and mefE both MFS-type efflux proteins that confer macrolide resistance.	lincosamide;macrolide;oxazolidinone;phenicol;pleuromutilin;streptogramin;tetracycline
input.faa	contig212955-cat_1_7	1	1218	+	mel	1-1218/1218	===============	0/0	100	91.71	card	AF227521.1:3269-4487	Mel a homolog of MsrA is an ABC-F subfamily protein associated with macrolide resistance. It is expressed on the same operon as mefA and mefE both MFS-type efflux proteins that confer macrolide resistance.	lincosamide;macrolide;oxazolidinone;phenicol;pleuromutilin;streptogramin;tetracycline
input.faa	contig214692-cat_1_2	1	1218	+	mel	1-1218/1218	===============	0/0	100	91.71	card	AF227521.1:3269-4487	Mel a homolog of MsrA is an ABC-F subfamily protein associated with macrolide resistance. It is expressed on the same operon as mefA and mefE both MFS-type efflux proteins that confer macrolide resistance.	lincosamide;macrolide;oxazolidinone;phenicol;pleuromutilin;streptogramin;tetracycline
input.faa	contig216042-cat_1_1	1	735	+	ErmG	1-735/735	===============	0/0	100	99.59	card	L42817:201-936	ErmG is a rRNA adenine N-6-methyltransferase that protects the ribosome from inactivation due to antibiotic binding.	lincosamide;macrolide;streptogramin
input.faa	contig216042-cat_1_5	1	1218	+	mel	1-1218/1218	===============	0/0	100	91.71	card	AF227521.1:3269-4487	Mel a homolog of MsrA is an ABC-F subfamily protein associated with macrolide resistance. It is expressed on the same operon as mefA and mefE both MFS-type efflux proteins that confer macrolide resistance.	lincosamide;macrolide;oxazolidinone;phenicol;pleuromutilin;streptogramin;tetracycline
input.faa	contig220698-cat_1_13	1	1218	+	mel	1-1218/1218	===============	0/0	100	91.71	card	AF227521.1:3269-4487	Mel a homolog of MsrA is an ABC-F subfamily protein associated with macrolide resistance. It is expressed on the same operon as mefA and mefE both MFS-type efflux proteins that confer macrolide resistance.	lincosamide;macrolide;oxazolidinone;phenicol;pleuromutilin;streptogramin;tetracycline
input.faa	contig224644-cat_1_26	1	333	+	Escherichia_coli_emrE	1-333/333	===============	0/0	100	98.8	card	Z11877.1:485-818	Member of the small MDR (multidrug resistance) family of transporters; in Escherichia coli this protein provides resistance against a number of positively charged compounds including ethidium bromide and erythromycin; proton-dependent secondary transporter which exchanges protons for compound translocation	macrolide
input.faa	contig225208-cat_2_10	1	333	+	Escherichia_coli_emrE	1-333/333	===============	0/0	100	98.8	card	Z11877.1:485-818	Member of the small MDR (multidrug resistance) family of transporters; in Escherichia coli this protein provides resistance against a number of positively charged compounds including ethidium bromide and erythromycin; proton-dependent secondary transporter which exchanges protons for compound translocation	macrolide
input.faa	contig228203-cat_1_75	1	333	+	Escherichia_coli_emrE	1-333/333	===============	0/0	100	92.19	card	Z11877.1:485-818	Member of the small MDR (multidrug resistance) family of transporters; in Escherichia coli this protein provides resistance against a number of positively charged compounds including ethidium bromide and erythromycin; proton-dependent secondary transporter which exchanges protons for compound translocation	macrolide
input.faa	contig230278-cat_2_5	97	896	+	ErmF	1-800/801	===============	0/0	99.88	95	card	M17124:1181-1982	ErmF confers the MLSb phenotype.	lincosamide;macrolide;streptogramin
input.faa	contig231134-cat_2_8	97	896	+	ErmF	1-800/801	===============	0/0	99.88	95	card	M17124:1181-1982	ErmF confers the MLSb phenotype.	lincosamide;macrolide;streptogramin
input.faa	contig231244-cat_2_3	136	441	+	Escherichia_coli_emrE	1-305/333	========/=====.	45658	91.59	98.69	card	Z11877.1:485-818	Member of the small MDR (multidrug resistance) family of transporters; in Escherichia coli this protein provides resistance against a number of positively charged compounds including ethidium bromide and erythromycin; proton-dependent secondary transporter which exchanges protons for compound translocation	macrolide
input.faa	contig232863-cat_2_13	1	333	+	Escherichia_coli_emrE	1-333/333	===============	0/0	100	99.1	card	Z11877.1:485-818	Member of the small MDR (multidrug resistance) family of transporters; in Escherichia coli this protein provides resistance against a number of positively charged compounds including ethidium bromide and erythromycin; proton-dependent secondary transporter which exchanges protons for compound translocation	macrolide
input.faa	contig233597-cat_1_1	1	1920	+	tetQ	55-1974/1974	===============	0/0	97.26	98.28	card	Z21523:0-1974	TetQ is a ribosomal protection protein. Its gene is associated with a conjugative transposon and has been found in both Gram-positive and Gram-negative bacteria.	tetracycline
input.faa	contig233597-cat_1_9	97	896	+	ErmF	1-800/801	===============	0/0	99.88	95	card	M17124:1181-1982	ErmF confers the MLSb phenotype.	lincosamide;macrolide;streptogramin
input.faa	contig234039-cat_2_1	97	896	+	ErmF	1-800/801	===============	0/0	99.88	95	card	M17124:1181-1982	ErmF confers the MLSb phenotype.	lincosamide;macrolide;streptogramin
input.faa	contig235084-cat_2_8	97	798	+	ErmF	1-702/801	==============.	0/0	87.64	95.16	card	M17124:1181-1982	ErmF confers the MLSb phenotype.	lincosamide;macrolide;streptogramin
input.faa	contig236241-cat_1_32	1	333	+	Escherichia_coli_emrE	1-333/333	===============	0/0	100	99.7	card	Z11877.1:485-818	Member of the small MDR (multidrug resistance) family of transporters; in Escherichia coli this protein provides resistance against a number of positively charged compounds including ethidium bromide and erythromycin; proton-dependent secondary transporter which exchanges protons for compound translocation	macrolide
input.faa	contig236249-cat_1_31	1	333	+	Escherichia_coli_emrE	1-333/333	===============	0/0	100	99.7	card	Z11877.1:485-818	Member of the small MDR (multidrug resistance) family of transporters; in Escherichia coli this protein provides resistance against a number of positively charged compounds including ethidium bromide and erythromycin; proton-dependent secondary transporter which exchanges protons for compound translocation	macrolide
input.faa	contig236274-cat_1_31	1	333	+	Escherichia_coli_emrE	1-333/333	===============	0/0	100	99.7	card	Z11877.1:485-818	Member of the small MDR (multidrug resistance) family of transporters; in Escherichia coli this protein provides resistance against a number of positively charged compounds including ethidium bromide and erythromycin; proton-dependent secondary transporter which exchanges protons for compound translocation	macrolide
input.faa	contig239987-cat_1_4	1	840	+	sul1	1-840/840	===============	0/0	100	100	card	JF969163:1053-1893	Sul1 is a sulfonamide resistant dihydropteroate synthase of Gram-negative bacteria. It is linked to other resistance genes of class 1 integrons.	sulfonamide
input.faa	contig239987-cat_1_6	1	780	+	aadA2	1-780/780	===============	0/0	100	100	card	AF156486:5012-5792	aadA2 is an aminoglycoside nucleotidyltransferase gene encoded by plasmids and integrons in K. pneumoniae Salmonella spp. Corynebacterium glutamicum C. freundii and Aeromonas spp.	aminoglycoside
input.faa	contig240227-cat_1_2	1	969	+	pmrF	1-969/969	===============	0/0	100	99.28	card	U00096:2367070-2368039	PmrF is required for the synthesis and transfer of 4-amino-4-deoxy-L-arabinose (Ara4N) to Lipid A which allows gram-negative bacteria to resist the antimicrobial activity of cationic antimicrobial peptides and antibiotics such as polymyxin. pmrF corresponds to 1 locus in Pseudomonas aeruginosa PAO1 and 1 locus in Pseudomonas aeruginosa LESB58.	peptide
input.faa	contig241807-cat_1_1	1	855	+	ErmX	1-855/855	========/======	45690	99.88	96.38	card	M36726.1:295-1150	ErmX is a rRNA methyltransferase that protects the ribosome from inactivation due to antibiotic binding.	lincosamide;macrolide;streptogramin
input.faa	contig244222-cat_1_1	1	855	+	ErmX	1-855/855	========/======	45690	99.88	96.38	card	M36726.1:295-1150	ErmX is a rRNA methyltransferase that protects the ribosome from inactivation due to antibiotic binding.	lincosamide;macrolide;streptogramin
input.faa	contig244825-cat_1_1	1	855	+	ErmX	1-855/855	========/======	45690	99.88	96.38	card	M36726.1:295-1150	ErmX is a rRNA methyltransferase that protects the ribosome from inactivation due to antibiotic binding.	lincosamide;macrolide;streptogramin
input.faa	contig246052-cat_1_17	1	855	+	ErmX	1-855/855	========/======	45690	99.88	96.38	card	M36726.1:295-1150	ErmX is a rRNA methyltransferase that protects the ribosome from inactivation due to antibiotic binding.	lincosamide;macrolide;streptogramin
input.faa	contig246204-cat_1_1	1	855	+	ErmX	1-855/855	========/======	45690	99.88	96.38	card	M36726.1:295-1150	ErmX is a rRNA methyltransferase that protects the ribosome from inactivation due to antibiotic binding.	lincosamide;macrolide;streptogramin
input.faa	contig246318-cat_1_1	1	855	+	ErmX	1-855/855	========/======	45690	99.88	96.38	card	M36726.1:295-1150	ErmX is a rRNA methyltransferase that protects the ribosome from inactivation due to antibiotic binding.	lincosamide;macrolide;streptogramin
input.faa	contig246478-cat_1_1	1	855	+	ErmX	1-855/855	========/======	45690	99.88	96.38	card	M36726.1:295-1150	ErmX is a rRNA methyltransferase that protects the ribosome from inactivation due to antibiotic binding.	lincosamide;macrolide;streptogramin
input.faa	contig246486-cat_1_1	1	855	+	ErmX	1-855/855	========/======	45690	99.88	96.38	card	M36726.1:295-1150	ErmX is a rRNA methyltransferase that protects the ribosome from inactivation due to antibiotic binding.	lincosamide;macrolide;streptogramin
input.faa	contig246586-cat_1_1	1	855	+	ErmX	1-855/855	========/======	45690	99.88	96.38	card	M36726.1:295-1150	ErmX is a rRNA methyltransferase that protects the ribosome from inactivation due to antibiotic binding.	lincosamide;macrolide;streptogramin
input.faa	contig246605-cat_1_1	1	855	+	ErmX	1-855/855	========/======	45690	99.88	96.38	card	M36726.1:295-1150	ErmX is a rRNA methyltransferase that protects the ribosome from inactivation due to antibiotic binding.	lincosamide;macrolide;streptogramin
input.faa	contig246643-cat_1_1	1	855	+	ErmX	1-855/855	========/======	45690	99.88	96.38	card	M36726.1:295-1150	ErmX is a rRNA methyltransferase that protects the ribosome from inactivation due to antibiotic binding.	lincosamide;macrolide;streptogramin
input.faa	contig246824-cat_1_1	1	855	+	ErmX	1-855/855	========/======	45690	99.88	96.38	card	M36726.1:295-1150	ErmX is a rRNA methyltransferase that protects the ribosome from inactivation due to antibiotic binding.	lincosamide;macrolide;streptogramin
input.faa	contig246911-cat_1_1	1	855	+	ErmX	1-855/855	========/======	45690	99.88	96.38	card	M36726.1:295-1150	ErmX is a rRNA methyltransferase that protects the ribosome from inactivation due to antibiotic binding.	lincosamide;macrolide;streptogramin
input.faa	contig249664-cat_1_6	1	780	+	aadA2	1-780/780	===============	0/0	100	100	card	AF156486:5012-5792	aadA2 is an aminoglycoside nucleotidyltransferase gene encoded by plasmids and integrons in K. pneumoniae Salmonella spp. Corynebacterium glutamicum C. freundii and Aeromonas spp.	aminoglycoside
input.faa	contig249664-cat_1_8	1	840	+	sul1	1-840/840	===============	0/0	100	100	card	JF969163:1053-1893	Sul1 is a sulfonamide resistant dihydropteroate synthase of Gram-negative bacteria. It is linked to other resistance genes of class 1 integrons.	sulfonamide
input.faa	contig250992-cat_1_10	1	495	+	lnuD	1-495/495	===============	0/0	100	83.84	card	EF452177:0-495	lnuD is a plasmid-mediated nucleotidyltransferase found in Streptococcus uberis	lincosamide
input.faa	contig251069-cat_1_2	1	900	+	APH(2'')-IIa	1-900/900	===============	0/0	100	84.44	card	AF337947:271-1171	APH(2'')-IIa is a chromosomal-encoded aminoglycoside phosphotransferase in E. faecium and E. coli	aminoglycoside
input.faa	contig251069-cat_1_3	1	537	+	AAC(6')-Im	1-537/537	===============	0/0	100	89.2	card	AF337947.1:1214-1751	AAC(6')-Im is an aminoglycoside acetyltransferase encoded by plasmids in E. coli and E. faecium	aminoglycoside
input.faa	contig253142-cat_1_1	1	855	+	ErmX	1-855/855	========/======	45690	99.88	96.38	card	M36726.1:295-1150	ErmX is a rRNA methyltransferase that protects the ribosome from inactivation due to antibiotic binding.	lincosamide;macrolide;streptogramin
input.faa	contig254216-cat_1_1	1	855	+	ErmX	1-855/855	========/======	45690	99.88	96.38	card	M36726.1:295-1150	ErmX is a rRNA methyltransferase that protects the ribosome from inactivation due to antibiotic binding.	lincosamide;macrolide;streptogramin
input.faa	contig254280-cat_1_1	1	855	+	ErmX	1-855/855	========/======	45690	99.88	96.38	card	M36726.1:295-1150	ErmX is a rRNA methyltransferase that protects the ribosome from inactivation due to antibiotic binding.	lincosamide;macrolide;streptogramin
input.faa	contig254687-cat_1_1	1	855	+	ErmX	1-855/855	========/======	45690	99.88	96.38	card	M36726.1:295-1150	ErmX is a rRNA methyltransferase that protects the ribosome from inactivation due to antibiotic binding.	lincosamide;macrolide;streptogramin
input.faa	contig254699-cat_1_1	1	855	+	ErmX	1-855/855	========/======	45690	99.88	96.38	card	M36726.1:295-1150	ErmX is a rRNA methyltransferase that protects the ribosome from inactivation due to antibiotic binding.	lincosamide;macrolide;streptogramin
input.faa	contig254862-cat_1_1	1	855	+	ErmX	1-855/855	========/======	45690	99.88	96.38	card	M36726.1:295-1150	ErmX is a rRNA methyltransferase that protects the ribosome from inactivation due to antibiotic binding.	lincosamide;macrolide;streptogramin
input.faa	contig254877-cat_1_1	1	855	+	ErmX	1-855/855	========/======	45690	99.88	96.38	card	M36726.1:295-1150	ErmX is a rRNA methyltransferase that protects the ribosome from inactivation due to antibiotic binding.	lincosamide;macrolide;streptogramin
input.faa	contig254970-cat_1_1	1	855	+	ErmX	1-855/855	========/======	45690	99.88	96.38	card	M36726.1:295-1150	ErmX is a rRNA methyltransferase that protects the ribosome from inactivation due to antibiotic binding.	lincosamide;macrolide;streptogramin
input.faa	contig255535-cat_1_6	1	1920	+	tetW	1-1920/1920	===============	0/0	100	98.23	card	AJ222769.3:3686-5606	TetW is a ribosomal protection protein. It is associated with both conjugative and non conjugative DNA and has been found strains of Clostridioides difficile.	tetracycline
input.faa	contig256862-cat_1_2	1	900	+	APH(2'')-IIa	1-900/900	===============	0/0	100	84.44	card	AF337947:271-1171	APH(2'')-IIa is a chromosomal-encoded aminoglycoside phosphotransferase in E. faecium and E. coli	aminoglycoside
input.faa	contig256862-cat_1_3	1	537	+	AAC(6')-Im	1-537/537	===============	0/0	100	89.2	card	AF337947.1:1214-1751	AAC(6')-Im is an aminoglycoside acetyltransferase encoded by plasmids in E. coli and E. faecium	aminoglycoside
input.faa	contig258480-cat_1_6	1	705	+	APH(3')-VIIa	49-753/753	===============	0/0	93.63	84.68	card	M29953:295-1048	APH(3')-VIIa is a plasmid-encoded aminoglycoside phosphotransferase in C. jejuni	aminoglycoside
input.faa	contig259885-cat_2_11	1	333	+	Escherichia_coli_emrE	1-333/333	===============	0/0	100	99.7	card	Z11877.1:485-818	Member of the small MDR (multidrug resistance) family of transporters; in Escherichia coli this protein provides resistance against a number of positively charged compounds including ethidium bromide and erythromycin; proton-dependent secondary transporter which exchanges protons for compound translocation	macrolide
input.faa	contig263394-cat_1_1	1	333	+	Escherichia_coli_emrE	1-333/333	===============	0/0	100	99.7	card	Z11877.1:485-818	Member of the small MDR (multidrug resistance) family of transporters; in Escherichia coli this protein provides resistance against a number of positively charged compounds including ethidium bromide and erythromycin; proton-dependent secondary transporter which exchanges protons for compound translocation	macrolide
input.faa	contig263647-cat_1_17	1	855	+	ErmX	1-855/855	========/======	45690	99.88	96.38	card	M36726.1:295-1150	ErmX is a rRNA methyltransferase that protects the ribosome from inactivation due to antibiotic binding.	lincosamide;macrolide;streptogramin
input.faa	contig263751-cat_1_1	1	855	+	ErmX	1-855/855	========/======	45690	99.88	96.38	card	M36726.1:295-1150	ErmX is a rRNA methyltransferase that protects the ribosome from inactivation due to antibiotic binding.	lincosamide;macrolide;streptogramin
input.faa	contig270189-cat_2_5	1	333	+	Escherichia_coli_emrE	1-333/333	===============	0/0	100	99.4	card	Z11877.1:485-818	Member of the small MDR (multidrug resistance) family of transporters; in Escherichia coli this protein provides resistance against a number of positively charged compounds including ethidium bromide and erythromycin; proton-dependent secondary transporter which exchanges protons for compound translocation	macrolide
input.faa	contig272900-cat_1_1	1	855	+	ACI-1	1-855/855	===============	0/0	100	99.77	card	AJ007350.1:239-1094	A class A beta-lactamase described in Acidaminococcus fermentans. ACI-1 was the first description of a beta-lactamase enzyme in a gram-negative anaerobic cocci. Described by Galan et al 2000.	cephalosporin;penam;penem
input.faa	contig275483-cat_1_1	1	1218	+	mel	1-1218/1218	===============	0/0	100	90.07	card	AF227521.1:3269-4487	Mel a homolog of MsrA is an ABC-F subfamily protein associated with macrolide resistance. It is expressed on the same operon as mefA and mefE both MFS-type efflux proteins that confer macrolide resistance.	lincosamide;macrolide;oxazolidinone;phenicol;pleuromutilin;streptogramin;tetracycline
input.faa	contig278235-cat_1_75	1	855	+	ACI-1	1-855/855	===============	0/0	100	99.77	card	AJ007350.1:239-1094	A class A beta-lactamase described in Acidaminococcus fermentans. ACI-1 was the first description of a beta-lactamase enzyme in a gram-negative anaerobic cocci. Described by Galan et al 2000.	cephalosporin;penam;penem
input.faa	contig280677-cat_1_24	1	333	+	Escherichia_coli_emrE	1-333/333	===============	0/0	100	98.8	card	Z11877.1:485-818	Member of the small MDR (multidrug resistance) family of transporters; in Escherichia coli this protein provides resistance against a number of positively charged compounds including ethidium bromide and erythromycin; proton-dependent secondary transporter which exchanges protons for compound translocation	macrolide
input.faa	contig282441-cat_1_39	1	1374	+	cpxA	1-1374/1374	===============	0/0	100	98.62	card	BA000007.3:4905062-4903688	CpxA is a membrane-localized sensor kinase that is activated by envelope stress. It starts a kinase cascade that activates CpxR which promotes efflux complex expression.	aminocoumarin;aminoglycoside
input.faa	contig288783-cat_1_40	1	333	+	Escherichia_coli_emrE	1-333/333	===============	0/0	100	98.8	card	Z11877.1:485-818	Member of the small MDR (multidrug resistance) family of transporters; in Escherichia coli this protein provides resistance against a number of positively charged compounds including ethidium bromide and erythromycin; proton-dependent secondary transporter which exchanges protons for compound translocation	macrolide
input.faa	contig294536-cat_1_10	1	495	+	lnuD	1-495/495	===============	0/0	100	83.84	card	EF452177:0-495	lnuD is a plasmid-mediated nucleotidyltransferase found in Streptococcus uberis	lincosamide
input.faa	contig301070-cat_1_6	1	735	+	ErmG	1-735/735	===============	0/0	100	99.59	card	L42817:201-936	ErmG is a rRNA adenine N-6-methyltransferase that protects the ribosome from inactivation due to antibiotic binding.	lincosamide;macrolide;streptogramin
