# Supplementary material for: Global Characterization of the Avian Gut Virome Reveals Extensive Viral Diversity and Functional Implications
Source: Research Square preprint supplement (doi:10.21203/rs.3.rs-6913311/v1), 2025-10-16
Supplement: Supplementary file 9 [file ecc8e2a05482ec7d39d6d961.xlsx]

## Sheet: Supplementary table 1
Supplementary Table S1: Sample metadata and accession numbers
study_id	project_id	sample_name	sample_host	geo_loc_name_country
ERR13583732	PRJEB79352	MP01_L1	Chicken	United Kingdom
ERR13583733	PRJEB79352	MP02_L1	Chicken	United Kingdom
ERR13583734	PRJEB79352	MP03_L1	Chicken	United Kingdom
ERR13583735	PRJEB79352	MP04_L1	Chicken	United Kingdom
ERR13583736	PRJEB79352	MP05_L1	Chicken	United Kingdom
ERR13583737	PRJEB79352	MP06_L1	Chicken	United Kingdom
ERR13583738	PRJEB79352	MP07_L1	Chicken	United Kingdom
ERR13583739	PRJEB79352	MP08_L1	Chicken	United Kingdom
ERR13583740	PRJEB79352	MP09_L1	Chicken	United Kingdom
ERR13583741	PRJEB79352	MP10_L1	Chicken	United Kingdom
ERR13583742	PRJEB79352	MP11_L1	Chicken	United Kingdom
ERR13583743	PRJEB79352	MP12_L1	Chicken	United Kingdom
ERR13583744	PRJEB79352	MP13_L1	Chicken	United Kingdom
ERR13583745	PRJEB79352	MP14_L1	Chicken	United Kingdom
ERR13583746	PRJEB79352	MP15_L1	Chicken	United Kingdom
ERR13583747	PRJEB79352	MP16_L1	Chicken	United Kingdom
ERR13583748	PRJEB79352	MP17_L1	Chicken	United Kingdom
ERR13583749	PRJEB79352	MP18_L1	Chicken	United Kingdom
ERR13583750	PRJEB79352	MP19_L1	Chicken	United Kingdom
ERR13583751	PRJEB79352	MP20_L1	Chicken	United Kingdom
ERR13583752	PRJEB79352	MP21_L1	Chicken	United Kingdom
ERR13583753	PRJEB79352	MP22_L1	Chicken	United Kingdom
ERR13583754	PRJEB79352	MP23_L1	Chicken	United Kingdom
ERR13583755	PRJEB79352	MP24_L1	Chicken	United Kingdom
ERR13583756	PRJEB79352	MP25_L1	Chicken	United Kingdom
ERR13583757	PRJEB79352	MP26_L1	Chicken	United Kingdom
ERR13583758	PRJEB79352	MP27_L1	Chicken	United Kingdom
ERR13583759	PRJEB79352	MP28_L1	Chicken	United Kingdom
ERR13583760	PRJEB79352	MP29_L1	Chicken	United Kingdom
ERR13583761	PRJEB79352	MP30_L1	Chicken	United Kingdom
ERR13583762	PRJEB79352	MP31_L1	Chicken	United Kingdom
ERR13583763	PRJEB79352	MP32_L1	Chicken	United Kingdom
ERR13583764	PRJEB79352	MP33_L1	Chicken	United Kingdom
ERR13583765	PRJEB79352	MP34_L1	Chicken	United Kingdom
ERR13583766	PRJEB79352	MP35_L1	Chicken	United Kingdom
ERR13583767	PRJEB79352	MP36_L1	Chicken	United Kingdom
ERR13583768	PRJEB79352	MP37_L1	Chicken	United Kingdom
ERR13583769	PRJEB79352	MP38_L1	Chicken	United Kingdom
ERR13583770	PRJEB79352	MP39_L1	Chicken	United Kingdom
ERR13583771	PRJEB79352	MP40_L1	Chicken	United Kingdom
ERR13583772	PRJEB79352	MP41_L1	Chicken	United Kingdom
ERR13583773	PRJEB79352	MP42_L1	Chicken	United Kingdom
ERR13583774	PRJEB79352	MP43_L1	Chicken	United Kingdom
ERR13583775	PRJEB79352	MP44_L1	Chicken	United Kingdom
ERR13583776	PRJEB79352	MP45_L1	Chicken	United Kingdom
ERR13583777	PRJEB79352	MP46_L1	Chicken	United Kingdom
ERR13583778	PRJEB79352	MP47_L1	Chicken	United Kingdom
ERR13583779	PRJEB79352	MP48_L1	Chicken	United Kingdom
ERR13583780	PRJEB79352	MP49_L1	Chicken	United Kingdom
ERR13583781	PRJEB79352	MP50_L1	Chicken	United Kingdom
ERR13583782	PRJEB79352	MP51_L1	Chicken	United Kingdom
ERR13583783	PRJEB79352	MP52_L1	Chicken	United Kingdom
ERR13583784	PRJEB79352	MP53_L1	Chicken	United Kingdom
ERR13583785	PRJEB79352	MP54_L1	Chicken	United Kingdom
ERR13583786	PRJEB79352	MP55_L1	Chicken	United Kingdom
ERR13583787	PRJEB79352	MP56_L1	Chicken	United Kingdom
ERR13583788	PRJEB79352	MP57_L1	Chicken	United Kingdom
ERR13583789	PRJEB79352	MP58_L1	Chicken	United Kingdom
ERR13583790	PRJEB79352	MP59_L1	Chicken	United Kingdom
ERR13583791	PRJEB79352	MP60_L1	Chicken	United Kingdom
ERR13583792	PRJEB79352	MP61_L1	Chicken	United Kingdom
ERR13583793	PRJEB79352	MP62_L1	Chicken	United Kingdom
ERR13583794	PRJEB79352	MP63_L1	Chicken	United Kingdom
ERR13583795	PRJEB79352	MP64_L1	Chicken	United Kingdom
ERR13583796	PRJEB79352	MP65_L1	Chicken	United Kingdom
ERR13583797	PRJEB79352	MP66_L1	Chicken	United Kingdom
ERR13583798	PRJEB79352	MP67_L1	Chicken	United Kingdom
ERR13583799	PRJEB79352	MP68_L1	Chicken	United Kingdom
ERR13583800	PRJEB79352	MP69_L1	Chicken	United Kingdom
ERR13583801	PRJEB79352	MP70_L1	Chicken	United Kingdom
ERR13583802	PRJEB79352	MP71_L1	Chicken	United Kingdom
ERR13583803	PRJEB79352	MP72_L1	Chicken	United Kingdom
ERR13583804	PRJEB79352	MP73_L1	Chicken	United Kingdom
ERR13583805	PRJEB79352	MP74_L1	Chicken	United Kingdom
ERR13583806	PRJEB79352	MP75_L1	Chicken	United Kingdom
ERR13583807	PRJEB79352	MP76_L1	Chicken	United Kingdom
ERR13583808	PRJEB79352	MP77_L1	Chicken	United Kingdom
ERR13583809	PRJEB79352	MP78_L1	Chicken	United Kingdom
ERR13583810	PRJEB79352	MP79_L1	Chicken	United Kingdom
ERR13583811	PRJEB79352	MP80_L1	Chicken	United Kingdom
ERR13583812	PRJEB79352	MP81_L1	Chicken	United Kingdom
ERR13583813	PRJEB79352	MP82_L1	Chicken	United Kingdom
ERR13583814	PRJEB79352	MP83_L1	Chicken	United Kingdom
ERR13583815	PRJEB79352	MP84_L1	Chicken	United Kingdom
ERR13583816	PRJEB79352	MP85_L1	Chicken	United Kingdom
ERR13583817	PRJEB79352	MP86_L1	Chicken	United Kingdom
ERR13583818	PRJEB79352	MP87_L1	Chicken	United Kingdom
ERR13583819	PRJEB79352	MP88_L1	Chicken	United Kingdom
ERR13583820	PRJEB79352	MP89_L1	Chicken	United Kingdom
ERR13583821	PRJEB79352	MP90_L1	Chicken	United Kingdom
ERR13583822	PRJEB79352	MP91_L1	Chicken	United Kingdom
ERR13583823	PRJEB79352	MP92_L1	Chicken	United Kingdom
ERR13583824	PRJEB79352	MP93_L1	Chicken	United Kingdom
ERR13583825	PRJEB79352	MP94_L1	Chicken	United Kingdom
ERR13583826	PRJEB79352	MP95_L1	Chicken	United Kingdom
ERR13583827	PRJEB79352	MP96_L1	Chicken	United Kingdom
ERR13583828	PRJEB79352	MP97_L1	Chicken	United Kingdom
ERR13583829	PRJEB79352	MP98_L1	Chicken	United Kingdom
ERR13583830	PRJEB79352	MP99_L1	Chicken	United Kingdom
ERR13583831	PRJEB79352	MP100_L1	Chicken	United Kingdom
ERR13583832	PRJEB79352	MP101_L1	Chicken	United Kingdom
ERR13583833	PRJEB79352	MP102_L1	Chicken	United Kingdom
ERR13583834	PRJEB79352	MP103_L1	Chicken	United Kingdom
ERR13583835	PRJEB79352	MP104_L1	Chicken	United Kingdom
ERR13583836	PRJEB79352	MP105_L1	Chicken	United Kingdom
ERR13583837	PRJEB79352	MP106_L1	Chicken	United Kingdom
ERR13583838	PRJEB79352	MP107_L1	Chicken	United Kingdom
ERR13583839	PRJEB79352	MP108_L1	Chicken	United Kingdom
ERR13583840	PRJEB79352	MP109_L1	Chicken	United Kingdom
ERR13583841	PRJEB79352	MP110_L1	Chicken	United Kingdom
ERR13583842	PRJEB79352	MP111_L1	Chicken	United Kingdom
ERR13583843	PRJEB79352	MP112_L1	Chicken	United Kingdom
ERR13583844	PRJEB79352	MP113_L1	Chicken	United Kingdom
ERR13583845	PRJEB79352	MP114_L1	Chicken	United Kingdom
ERR13583846	PRJEB79352	MP115_L1	Chicken	United Kingdom
ERR13583847	PRJEB79352	MP116_L1	Chicken	United Kingdom
ERR13583848	PRJEB79352	MP117_L1	Chicken	United Kingdom
ERR13583849	PRJEB79352	MP118_L1	Chicken	United Kingdom
ERR13583850	PRJEB79352	MP119_L1	Chicken	United Kingdom
ERR13583851	PRJEB79352	MP120_L1	Chicken	United Kingdom
ERR13583852	PRJEB79352	MP01_L3	Chicken	United Kingdom
ERR13583853	PRJEB79352	MP02_L3	Chicken	United Kingdom
ERR13583854	PRJEB79352	MP03_L3	Chicken	United Kingdom
ERR13583855	PRJEB79352	MP04_L3	Chicken	United Kingdom
ERR13583856	PRJEB79352	MP05_L3	Chicken	United Kingdom
ERR13583857	PRJEB79352	MP06_L3	Chicken	United Kingdom
ERR13583858	PRJEB79352	MP07_L3	Chicken	United Kingdom
ERR13583859	PRJEB79352	MP08_L3	Chicken	United Kingdom
ERR13583860	PRJEB79352	MP09_L3	Chicken	United Kingdom
ERR13583861	PRJEB79352	MP10_L3	Chicken	United Kingdom
ERR13583862	PRJEB79352	MP11_L3	Chicken	United Kingdom
ERR13583863	PRJEB79352	MP12_L3	Chicken	United Kingdom
ERR13583864	PRJEB79352	MP13_L3	Chicken	United Kingdom
ERR13583865	PRJEB79352	MP14_L3	Chicken	United Kingdom
ERR13583866	PRJEB79352	MP15_L3	Chicken	United Kingdom
ERR13583867	PRJEB79352	MP16_L3	Chicken	United Kingdom
ERR13583868	PRJEB79352	MP17_L3	Chicken	United Kingdom
ERR13583869	PRJEB79352	MP18_L3	Chicken	United Kingdom
ERR13583870	PRJEB79352	MP19_L3	Chicken	United Kingdom
ERR13583871	PRJEB79352	MP20_L3	Chicken	United Kingdom
ERR13583872	PRJEB79352	MP21_L3	Chicken	United Kingdom
ERR13583873	PRJEB79352	MP22_L3	Chicken	United Kingdom
ERR13583874	PRJEB79352	MP23_L3	Chicken	United Kingdom
ERR13583875	PRJEB79352	MP24_L3	Chicken	United Kingdom
ERR13583876	PRJEB79352	MP25_L3	Chicken	United Kingdom
ERR13583877	PRJEB79352	MP26_L3	Chicken	United Kingdom
ERR13583878	PRJEB79352	MP27_L3	Chicken	United Kingdom
ERR13583879	PRJEB79352	MP28_L3	Chicken	United Kingdom
ERR13583880	PRJEB79352	MP29_L3	Chicken	United Kingdom
ERR13583881	PRJEB79352	MP30_L3	Chicken	United Kingdom
ERR13583882	PRJEB79352	MP31_L3	Chicken	United Kingdom
ERR13583883	PRJEB79352	MP32_L3	Chicken	United Kingdom
ERR13583884	PRJEB79352	MP33_L3	Chicken	United Kingdom
ERR13583885	PRJEB79352	MP34_L3	Chicken	United Kingdom
ERR13583886	PRJEB79352	MP35_L3	Chicken	United Kingdom
ERR13583887	PRJEB79352	MP36_L3	Chicken	United Kingdom
ERR13583888	PRJEB79352	MP37_L3	Chicken	United Kingdom
ERR13583889	PRJEB79352	MP38_L3	Chicken	United Kingdom
ERR13583890	PRJEB79352	MP39_L3	Chicken	United Kingdom
ERR13583891	PRJEB79352	MP40_L3	Chicken	United Kingdom
ERR13583892	PRJEB79352	MP41_L3	Chicken	United Kingdom
ERR13583893	PRJEB79352	MP42_L3	Chicken	United Kingdom
ERR13583894	PRJEB79352	MP43_L3	Chicken	United Kingdom
ERR13583895	PRJEB79352	MP44_L3	Chicken	United Kingdom
ERR13583896	PRJEB79352	MP45_L3	Chicken	United Kingdom
ERR13583897	PRJEB79352	MP46_L3	Chicken	United Kingdom
ERR13583898	PRJEB79352	MP47_L3	Chicken	United Kingdom
ERR13583899	PRJEB79352	MP48_L3	Chicken	United Kingdom
ERR13583900	PRJEB79352	MP49_L3	Chicken	United Kingdom
ERR13583901	PRJEB79352	MP50_L3	Chicken	United Kingdom
ERR13583902	PRJEB79352	MP51_L3	Chicken	United Kingdom
ERR13583903	PRJEB79352	MP52_L3	Chicken	United Kingdom
ERR13583904	PRJEB79352	MP53_L3	Chicken	United Kingdom
ERR13583905	PRJEB79352	MP54_L3	Chicken	United Kingdom
ERR13583906	PRJEB79352	MP55_L3	Chicken	United Kingdom
ERR13583907	PRJEB79352	MP56_L3	Chicken	United Kingdom
ERR13583908	PRJEB79352	MP57_L3	Chicken	United Kingdom
ERR13583909	PRJEB79352	MP58_L3	Chicken	United Kingdom
ERR13583910	PRJEB79352	MP59_L3	Chicken	United Kingdom
ERR13583911	PRJEB79352	MP60_L3	Chicken	United Kingdom
ERR13583912	PRJEB79352	MP61_L3	Chicken	United Kingdom
ERR13583913	PRJEB79352	MP62_L3	Chicken	United Kingdom
ERR13583914	PRJEB79352	MP63_L3	Chicken	United Kingdom
ERR13583915	PRJEB79352	MP64_L3	Chicken	United Kingdom
ERR13583916	PRJEB79352	MP65_L3	Chicken	United Kingdom
ERR13583917	PRJEB79352	MP66_L3	Chicken	United Kingdom
ERR13583918	PRJEB79352	MP67_L3	Chicken	United Kingdom
ERR13583919	PRJEB79352	MP68_L3	Chicken	United Kingdom
ERR13583920	PRJEB79352	MP69_L3	Chicken	United Kingdom
ERR13583921	PRJEB79352	MP70_L3	Chicken	United Kingdom
ERR13583922	PRJEB79352	MP71_L3	Chicken	United Kingdom
ERR13583923	PRJEB79352	MP72_L3	Chicken	United Kingdom
ERR13583924	PRJEB79352	MP73_L3	Chicken	United Kingdom
ERR13583925	PRJEB79352	MP74_L3	Chicken	United Kingdom
ERR13583926	PRJEB79352	MP75_L3	Chicken	United Kingdom
ERR13583927	PRJEB79352	MP76_L3	Chicken	United Kingdom
ERR13583928	PRJEB79352	MP77_L3	Chicken	United Kingdom
ERR13583929	PRJEB79352	MP78_L3	Chicken	United Kingdom
ERR13583930	PRJEB79352	MP79_L3	Chicken	United Kingdom
ERR13583931	PRJEB79352	MP80_L3	Chicken	United Kingdom
ERR13583932	PRJEB79352	MP81_L3	Chicken	United Kingdom
ERR13583933	PRJEB79352	MP82_L3	Chicken	United Kingdom
ERR13583934	PRJEB79352	MP83_L3	Chicken	United Kingdom
ERR13583935	PRJEB79352	MP84_L3	Chicken	United Kingdom
ERR13583936	PRJEB79352	MP85_L3	Chicken	United Kingdom
ERR13583937	PRJEB79352	MP86_L3	Chicken	United Kingdom
ERR13583938	PRJEB79352	MP87_L3	Chicken	United Kingdom
ERR13583939	PRJEB79352	MP88_L3	Chicken	United Kingdom
ERR13583940	PRJEB79352	MP89_L3	Chicken	United Kingdom
ERR13583941	PRJEB79352	MP90_L3	Chicken	United Kingdom
ERR13583942	PRJEB79352	MP91_L3	Chicken	United Kingdom
ERR13583943	PRJEB79352	MP92_L3	Chicken	United Kingdom
ERR13583944	PRJEB79352	MP93_L3	Chicken	United Kingdom
ERR13583945	PRJEB79352	MP94_L3	Chicken	United Kingdom
ERR13583946	PRJEB79352	MP95_L3	Chicken	United Kingdom
ERR13583947	PRJEB79352	MP96_L3	Chicken	United Kingdom
ERR13583948	PRJEB79352	MP97_L3	Chicken	United Kingdom
ERR13583949	PRJEB79352	MP98_L3	Chicken	United Kingdom
ERR13583950	PRJEB79352	MP99_L3	Chicken	United Kingdom
ERR13583951	PRJEB79352	MP100_L3	Chicken	United Kingdom
ERR13583952	PRJEB79352	MP101_L3	Chicken	United Kingdom
ERR13583953	PRJEB79352	MP102_L3	Chicken	United Kingdom
ERR13583954	PRJEB79352	MP103_L3	Chicken	United Kingdom
ERR13583955	PRJEB79352	MP104_L3	Chicken	United Kingdom
ERR13583956	PRJEB79352	MP105_L3	Chicken	United Kingdom
ERR13583957	PRJEB79352	MP106_L3	Chicken	United Kingdom
ERR13583958	PRJEB79352	MP107_L3	Chicken	United Kingdom
ERR13583959	PRJEB79352	MP108_L3	Chicken	United Kingdom
ERR13583960	PRJEB79352	MP109_L3	Chicken	United Kingdom
ERR13583961	PRJEB79352	MP110_L3	Chicken	United Kingdom
ERR13583962	PRJEB79352	MP111_L3	Chicken	United Kingdom
ERR13583963	PRJEB79352	MP112_L3	Chicken	United Kingdom
ERR13583964	PRJEB79352	MP113_L3	Chicken	United Kingdom
ERR13583965	PRJEB79352	MP114_L3	Chicken	United Kingdom
ERR13583966	PRJEB79352	MP115_L3	Chicken	United Kingdom
ERR13583967	PRJEB79352	MP116_L3	Chicken	United Kingdom
ERR13583968	PRJEB79352	MP117_L3	Chicken	United Kingdom
ERR13583969	PRJEB79352	MP118_L3	Chicken	United Kingdom
ERR13583970	PRJEB79352	MP119_L3	Chicken	United Kingdom
ERR13583971	PRJEB79352	MP120_L3	Chicken	United Kingdom
ERR2241628	PRJEB22062	SAMEA104467131	Chicken	Netherlands
ERR2241631	PRJEB22062	SAMEA104467134	Chicken	Netherlands
ERR2241632	PRJEB22062	SAMEA104467135	Chicken	Netherlands
ERR2241634	PRJEB22062	SAMEA104467137	Chicken	Netherlands
ERR2241635	PRJEB22062	SAMEA104467138	Chicken	Netherlands
ERR2241637	PRJEB22062	SAMEA104467140	Chicken	Netherlands
ERR2241639	PRJEB22062	SAMEA104467142	Chicken	Netherlands
ERR2241641	PRJEB22062	SAMEA104467144	Chicken	Netherlands
ERR2241643	PRJEB22062	SAMEA104467146	Chicken	Netherlands
ERR2241645	PRJEB22062	SAMEA104467148	Chicken	Netherlands
ERR2241647	PRJEB22062	SAMEA104467150	Chicken	Netherlands
ERR2241649	PRJEB22062	SAMEA104467152	Chicken	Netherlands
ERR2241651	PRJEB22062	SAMEA104467154	Chicken	Netherlands
ERR2241653	PRJEB22062	SAMEA104467156	Chicken	Netherlands
ERR2241655	PRJEB22062	SAMEA104467158	Chicken	Netherlands
ERR2241657	PRJEB22062	SAMEA104467160	Chicken	Netherlands
ERR2241659	PRJEB22062	SAMEA104467162	Chicken	Netherlands
ERR2241662	PRJEB22062	SAMEA104467165	Chicken	Netherlands
ERR2241664	PRJEB22062	SAMEA104467167	Chicken	Netherlands
ERR2241665	PRJEB22062	SAMEA104467168	Chicken	Netherlands
ERR2241686	PRJEB22062	SAMEA104467189	Chicken	Germany
ERR2241687	PRJEB22062	SAMEA104467190	Chicken	Germany
ERR2241688	PRJEB22062	SAMEA104467191	Chicken	Germany
ERR2241689	PRJEB22062	SAMEA104467192	Chicken	Germany
ERR2241690	PRJEB22062	SAMEA104467193	Chicken	Germany
ERR2241691	PRJEB22062	SAMEA104467194	Chicken	Germany
ERR2241692	PRJEB22062	SAMEA104467195	Chicken	Germany
ERR2241693	PRJEB22062	SAMEA104467196	Chicken	Germany
ERR2241694	PRJEB22062	SAMEA104467197	Chicken	Germany
ERR2241695	PRJEB22062	SAMEA104467198	Chicken	Germany
ERR2241696	PRJEB22062	SAMEA104467199	Chicken	Germany
ERR2241697	PRJEB22062	SAMEA104467200	Chicken	Germany
ERR2241698	PRJEB22062	SAMEA104467201	Chicken	Germany
ERR2241699	PRJEB22062	SAMEA104467202	Chicken	Germany
ERR2241700	PRJEB22062	SAMEA104467203	Chicken	Germany
ERR2241701	PRJEB22062	SAMEA104467204	Chicken	Germany
ERR2241702	PRJEB22062	SAMEA104467205	Chicken	Germany
ERR2241703	PRJEB22062	SAMEA104467206	Chicken	Germany
ERR2241704	PRJEB22062	SAMEA104467207	Chicken	Germany
ERR2241725	PRJEB22062	SAMEA104467228	Chicken	France
ERR2241726	PRJEB22062	SAMEA104467229	Chicken	France
ERR2241727	PRJEB22062	SAMEA104467230	Chicken	France
ERR2241728	PRJEB22062	SAMEA104467231	Chicken	France
ERR2241729	PRJEB22062	SAMEA104467232	Chicken	France
ERR2241730	PRJEB22062	SAMEA104467233	Chicken	France
ERR2241731	PRJEB22062	SAMEA104467234	Chicken	France
ERR2241732	PRJEB22062	SAMEA104467235	Chicken	France
ERR2241733	PRJEB22062	SAMEA104467236	Chicken	France
ERR2241734	PRJEB22062	SAMEA104467237	Chicken	France
ERR2241735	PRJEB22062	SAMEA104467238	Chicken	France
ERR2241736	PRJEB22062	SAMEA104467239	Chicken	France
ERR2241737	PRJEB22062	SAMEA104467240	Chicken	France
ERR2241738	PRJEB22062	SAMEA104467241	Chicken	France
ERR2241739	PRJEB22062	SAMEA104467242	Chicken	France
ERR2241740	PRJEB22062	SAMEA104467243	Chicken	France
ERR2241741	PRJEB22062	SAMEA104467244	Chicken	France
ERR2241742	PRJEB22062	SAMEA104467245	Chicken	France
ERR2241743	PRJEB22062	SAMEA104467246	Chicken	France
ERR2241744	PRJEB22062	SAMEA104467247	Chicken	France
ERR2241747	PRJEB22062	SAMEA104467250	Chicken	Spain
ERR2241748	PRJEB22062	SAMEA104467251	Chicken	Spain
ERR2241749	PRJEB22062	SAMEA104467252	Chicken	Spain
ERR2241750	PRJEB22062	SAMEA104467253	Chicken	Spain
ERR2241752	PRJEB22062	SAMEA104467255	Chicken	Spain
ERR2241753	PRJEB22062	SAMEA104467256	Chicken	Spain
ERR2241754	PRJEB22062	SAMEA104467257	Chicken	Spain
ERR2241755	PRJEB22062	SAMEA104467258	Chicken	Spain
ERR2241756	PRJEB22062	SAMEA104467259	Chicken	Spain
ERR2241758	PRJEB22062	SAMEA104467261	Chicken	Spain
ERR2241759	PRJEB22062	SAMEA104467262	Chicken	Spain
ERR2241760	PRJEB22062	SAMEA104467263	Chicken	Spain
ERR2241761	PRJEB22062	SAMEA104467264	Chicken	Spain
ERR2241762	PRJEB22062	SAMEA104467265	Chicken	Spain
ERR2241763	PRJEB22062	SAMEA104467266	Chicken	Spain
ERR2241764	PRJEB22062	SAMEA104467267	Chicken	Spain
ERR2241765	PRJEB22062	SAMEA104467268	Chicken	Spain
ERR2241770	PRJEB22062	SAMEA104467273	Chicken	Spain
ERR2241783	PRJEB22062	SAMEA104467286	Chicken	Spain
ERR2241784	PRJEB22062	SAMEA104467287	Chicken	Spain
ERR2241788	PRJEB22062	SAMEA104467291	Chicken	Belgium
ERR2241790	PRJEB22062	SAMEA104467293	Chicken	Belgium
ERR2241791	PRJEB22062	SAMEA104467294	Chicken	Belgium
ERR2241794	PRJEB22062	SAMEA104467297	Chicken	Belgium
ERR2241795	PRJEB22062	SAMEA104467298	Chicken	Belgium
ERR2241798	PRJEB22062	SAMEA104467301	Chicken	Belgium
ERR2241799	PRJEB22062	SAMEA104467302	Chicken	Belgium
ERR2241801	PRJEB22062	SAMEA104467304	Chicken	Belgium
ERR2241802	PRJEB22062	SAMEA104467305	Chicken	Belgium
ERR2241803	PRJEB22062	SAMEA104467306	Chicken	Belgium
ERR2241805	PRJEB22062	SAMEA104467308	Chicken	Belgium
ERR2241806	PRJEB22062	SAMEA104467309	Chicken	Belgium
ERR2241807	PRJEB22062	SAMEA104467310	Chicken	Belgium
ERR2241808	PRJEB22062	SAMEA104467311	Chicken	Belgium
ERR2241809	PRJEB22062	SAMEA104467312	Chicken	Belgium
ERR2241815	PRJEB22062	SAMEA104467318	Chicken	Belgium
ERR2241818	PRJEB22062	SAMEA104467321	Chicken	Belgium
ERR2241819	PRJEB22062	SAMEA104467322	Chicken	Belgium
ERR2241823	PRJEB22062	SAMEA104467326	Chicken	Belgium
ERR2241824	PRJEB22062	SAMEA104467327	Chicken	Belgium
ERR2241828	PRJEB22062	SAMEA104467331	Chicken	Italy
ERR2241848	PRJEB22062	SAMEA104467351	Chicken	Italy
ERR2241849	PRJEB22062	SAMEA104467352	Chicken	Italy
ERR2241850	PRJEB22062	SAMEA104467353	Chicken	Italy
ERR2241851	PRJEB22062	SAMEA104467354	Chicken	Italy
ERR2241852	PRJEB22062	SAMEA104467355	Chicken	Italy
ERR2241853	PRJEB22062	SAMEA104467356	Chicken	Italy
ERR2241854	PRJEB22062	SAMEA104467357	Chicken	Italy
ERR2241855	PRJEB22062	SAMEA104467358	Chicken	Italy
ERR2241856	PRJEB22062	SAMEA104467359	Chicken	Italy
ERR2241857	PRJEB22062	SAMEA104467360	Chicken	Italy
ERR2241858	PRJEB22062	SAMEA104467361	Chicken	Italy
ERR2241859	PRJEB22062	SAMEA104467362	Chicken	Italy
ERR2241860	PRJEB22062	SAMEA104467363	Chicken	Italy
ERR2241861	PRJEB22062	SAMEA104467364	Chicken	Italy
ERR2241862	PRJEB22062	SAMEA104467365	Chicken	Italy
ERR2241863	PRJEB22062	SAMEA104467366	Chicken	Italy
ERR2241864	PRJEB22062	SAMEA104467367	Chicken	Italy
ERR2241865	PRJEB22062	SAMEA104467368	Chicken	Italy
ERR2241866	PRJEB22062	SAMEA104467369	Chicken	Italy
ERR2241887	PRJEB22062	SAMEA104467390	Chicken	Poland
ERR2241888	PRJEB22062	SAMEA104467391	Chicken	Poland
ERR2241889	PRJEB22062	SAMEA104467392	Chicken	Poland
ERR2241890	PRJEB22062	SAMEA104467393	Chicken	Poland
ERR2241891	PRJEB22062	SAMEA104467394	Chicken	Poland
ERR2241892	PRJEB22062	SAMEA104467395	Chicken	Poland
ERR2241893	PRJEB22062	SAMEA104467396	Chicken	Poland
ERR2241894	PRJEB22062	SAMEA104467397	Chicken	Poland
ERR2241895	PRJEB22062	SAMEA104467398	Chicken	Poland
ERR2241896	PRJEB22062	SAMEA104467399	Chicken	Poland
ERR2241897	PRJEB22062	SAMEA104467400	Chicken	Poland
ERR2241898	PRJEB22062	SAMEA104467401	Chicken	Poland
ERR2241899	PRJEB22062	SAMEA104467402	Chicken	Poland
ERR2241900	PRJEB22062	SAMEA104467403	Chicken	Poland
ERR2241901	PRJEB22062	SAMEA104467404	Chicken	Poland
ERR2241902	PRJEB22062	SAMEA104467405	Chicken	Poland
ERR2241903	PRJEB22062	SAMEA104467406	Chicken	Poland
ERR2241904	PRJEB22062	SAMEA104467407	Chicken	Poland
ERR2241905	PRJEB22062	SAMEA104467408	Chicken	Poland
ERR2241906	PRJEB22062	SAMEA104467409	Chicken	Poland
ERR2241907	PRJEB22062	SAMEA104467410	Chicken	Denmark
ERR2241909	PRJEB22062	SAMEA104467412	Chicken	Denmark
ERR2241911	PRJEB22062	SAMEA104467414	Chicken	Denmark
ERR2241913	PRJEB22062	SAMEA104467416	Chicken	Denmark
ERR2241915	PRJEB22062	SAMEA104467418	Chicken	Denmark
ERR2241917	PRJEB22062	SAMEA104467420	Chicken	Denmark
ERR2241919	PRJEB22062	SAMEA104467422	Chicken	Denmark
ERR2241921	PRJEB22062	SAMEA104467424	Chicken	Denmark
ERR2241923	PRJEB22062	SAMEA104467426	Chicken	Denmark
ERR2241925	PRJEB22062	SAMEA104467428	Chicken	Denmark
ERR2241927	PRJEB22062	SAMEA104467430	Chicken	Denmark
ERR2241929	PRJEB22062	SAMEA104467432	Chicken	Denmark
ERR2241931	PRJEB22062	SAMEA104467434	Chicken	Denmark
ERR2241933	PRJEB22062	SAMEA104467436	Chicken	Denmark
ERR2241935	PRJEB22062	SAMEA104467438	Chicken	Denmark
ERR2241937	PRJEB22062	SAMEA104467440	Chicken	Denmark
ERR2241939	PRJEB22062	SAMEA104467442	Chicken	Denmark
ERR2241941	PRJEB22062	SAMEA104467444	Chicken	Denmark
ERR2241943	PRJEB22062	SAMEA104467446	Chicken	Denmark
ERR2241945	PRJEB22062	SAMEA104467448	Chicken	Denmark
ERR2241950	PRJEB22062	SAMEA104467453	Chicken	Bulgaria
ERR2241952	PRJEB22062	SAMEA104467455	Chicken	Bulgaria
ERR2241953	PRJEB22062	SAMEA104467456	Chicken	Bulgaria
ERR2241954	PRJEB22062	SAMEA104467457	Chicken	Bulgaria
ERR2241955	PRJEB22062	SAMEA104467458	Chicken	Bulgaria
ERR2241956	PRJEB22062	SAMEA104467459	Chicken	Bulgaria
ERR2241957	PRJEB22062	SAMEA104467460	Chicken	Bulgaria
ERR2241971	PRJEB22062	SAMEA104467474	Chicken	Bulgaria
ERR2241972	PRJEB22062	SAMEA104467475	Chicken	Bulgaria
ERR2241977	PRJEB22062	SAMEA104467480	Chicken	Bulgaria
ERR2241978	PRJEB22062	SAMEA104467481	Chicken	Bulgaria
ERR2241979	PRJEB22062	SAMEA104467482	Chicken	Bulgaria
ERR2241980	PRJEB22062	SAMEA104467483	Chicken	Bulgaria
ERR2241981	PRJEB22062	SAMEA104467484	Chicken	Bulgaria
ERR2241982	PRJEB22062	SAMEA104467485	Chicken	Bulgaria
ERR2241983	PRJEB22062	SAMEA104467486	Chicken	Bulgaria
ERR2241984	PRJEB22062	SAMEA104467487	Chicken	Bulgaria
ERR2241985	PRJEB22062	SAMEA104467488	Chicken	Bulgaria
ERR2241986	PRJEB22062	SAMEA104467489	Chicken	Bulgaria
ERR2245455	PRJEB22062	SAMEA104467203	Chicken	Germany
ERR3414571	PRJEB33338	Chicken 1 cecal contents: Ranger Classic\, Fish meal diet	Chicken	United Kingdom
ERR3414572	PRJEB33338	Chicken 2 cecal contents: Ross 308\, Fish meal diet	Chicken	United Kingdom
ERR3414573	PRJEB33338	Chicken 3 cecal contents: Ranger Classic\, Vegetable diet	Chicken	United Kingdom
ERR3414574	PRJEB33338	Chicken 4 cecal contents: Ross 308\, Vegetable diet	Chicken	United Kingdom
ERR3414575	PRJEB33338	Chicken 5 cecal contents: Ranger Classic\, Fish meal diet	Chicken	United Kingdom
ERR3414576	PRJEB33338	Chicken 6 cecal contents: Ross 308\, Fish meal diet	Chicken	United Kingdom
ERR3414577	PRJEB33338	Chicken 7 cecal contents: Ranger Classic\, Vegetable diet	Chicken	United Kingdom
ERR3414578	PRJEB33338	Chicken 8 cecal contents: Ross 308\, Vegetable diet	Chicken	United Kingdom
ERR3414579	PRJEB33338	Chicken 9 cecal contents: Ranger Classic\, Fish Meal diet	Chicken	United Kingdom
ERR3414580	PRJEB33338	Chicken 10 cecal contents: Ross 308\, Fish Meal diet	Chicken	United Kingdom
ERR3414581	PRJEB33338	Chicken 11 cecal contents: Ranger Classic\, Vegetable diet	Chicken	United Kingdom
ERR3414582	PRJEB33338	Chicken 12 cecal contents: Ross 308\, Vegetable diet	Chicken	United Kingdom
ERR3414583	PRJEB33338	Chicken 13 cecal contents: Ranger Classic\, Fish Meal diet	Chicken	United Kingdom
ERR3414584	PRJEB33338	Chicken 14 cecal contents: Ross 308\, Fish Meal diet	Chicken	United Kingdom
ERR3414585	PRJEB33338	Chicken 15 cecal contents: Ranger Classic\, Vegetable diet	Chicken	United Kingdom
ERR3414586	PRJEB33338	Chicken 16 cecal contents: Ross 308\, Vegetable diet	Chicken	United Kingdom
ERR3414587	PRJEB33338	Chicken 17 cecal contents: Ranger Classic\, Fish Meal diet	Chicken	United Kingdom
ERR3414588	PRJEB33338	Chicken 18 cecal contents: Ross 308\, Fish Meal diet	Chicken	United Kingdom
ERR3414589	PRJEB33338	Chicken 19 cecal contents: Ranger Classic\, Vegetable diet	Chicken	United Kingdom
ERR3414590	PRJEB33338	Chicken 20 cecal contents: Ross 308\, Vegetable diet	Chicken	United Kingdom
ERR3414591	PRJEB33338	Chicken 21 cecal contents: Ranger Classic\, Fish Meal diet	Chicken	United Kingdom
ERR3414592	PRJEB33338	Chicken 22 cecal contents: Ross 308\, Fish Meal diet	Chicken	United Kingdom
ERR3414593	PRJEB33338	Chicken 23 cecal contents: Ranger Classic\, Vegetable diet	Chicken	United Kingdom
ERR3414594	PRJEB33338	Chicken 24 cecal contents: Ross 308\, Vegetable diet	Chicken	United Kingdom
SRR10083277	PRJNA563508	GGL-B11	Migratory birds	China
SRR10083279	PRJNA563508	GGL-B12	Migratory birds	China
SRR10083280	PRJNA563508	GGL-B13	Migratory birds	China
SRR10083281	PRJNA563508	GGL-B14	Migratory birds	China
SRR10083282	PRJNA563508	GGL-B15	Migratory birds	China
SRR10083283	PRJNA563508	GGL-B16	Migratory birds	China
SRR10083284	PRJNA563508	GGL-B17	Migratory birds	China
SRR10083285	PRJNA563508	GGL-B4	Migratory birds	China
SRR10083286	PRJNA563508	GGL-B5	Migratory birds	China
SRR10083300	PRJNA563508	PYL-B9	Goose	China
SRR10083301	PRJNA563508	PYL-B7	Goose	China
SRR10083302	PRJNA563508	PYL-B6	Goose	China
SRR10083303	PRJNA563508	PYL-B3	Goose	China
SRR10083304	PRJNA563508	PYL-B2	Goose	China
SRR10083305	PRJNA563508	PYL-B15	Goose	China
SRR10083307	PRJNA563508	PYL-B14	Goose	China
SRR10083308	PRJNA563508	PYL-B13	Goose	China
SRR10083309	PRJNA563508	PYL-B12	Goose	China
SRR10083310	PRJNA563508	PYL-B11	Goose	China
SRR10083311	PRJNA563508	PYL-B10	Goose	China
SRR10083323	PRJNA563508	GGL-B7	Migratory birds	China
SRR10083324	PRJNA563508	GGL-B9	Migratory birds	China
SRR12516174	PRJNA658643	R3	Chicken	China
SRR12516175	PRJNA658643	R2	Chicken	China
SRR12516176	PRJNA658643	R1	Chicken	China
SRR12516177	PRJNA658643	F3	Chicken	China
SRR12516178	PRJNA658643	F2	Chicken	China
SRR12516179	PRJNA658643	F1	Chicken	China
SRR12516180	PRJNA658643	C3	Chicken	China
SRR12516181	PRJNA658643	C2	Chicken	China
SRR12516182	PRJNA658643	C1	Chicken	China
SRR14089573	PRJNA717910	korean quail-4	Coturnix	China
SRR14089574	PRJNA717910	korean quail-3	Coturnix	China
SRR14089575	PRJNA717910	korean quail-2	Coturnix	China
SRR14089576	PRJNA717910	korean quail-1	Coturnix	China
SRR14089577	PRJNA717910	korean quail-10	Coturnix	China
SRR14089578	PRJNA717910	korean quail-9	Coturnix	China
SRR14089579	PRJNA717910	korean quail-8	Coturnix	China
SRR14089580	PRJNA717910	korean quail-7	Coturnix	China
SRR14089581	PRJNA717910	korean quail-6	Coturnix	China
SRR14089582	PRJNA717910	korean quail-5	Coturnix	China
SRR14687313	PRJNA715658	iM21D2	Chicken	Austria
SRR14687314	PRJNA715658	fD3D2	Chicken	Austria
SRR14687315	PRJNA715658	cD3B3	Chicken	Austria
SRR14687316	PRJNA715658	iM21D1	Chicken	Austria
SRR14687317	PRJNA715658	iM21C4	Chicken	Austria
SRR14687318	PRJNA715658	iM21C3	Chicken	Austria
SRR14687319	PRJNA715658	iM21C2	Chicken	Austria
SRR14687320	PRJNA715658	iM21C1	Chicken	Austria
SRR14687321	PRJNA715658	iM21B4	Chicken	Austria
SRR14687322	PRJNA715658	iM21B3	Chicken	Austria
SRR14687323	PRJNA715658	iM21B2	Chicken	Austria
SRR14687324	PRJNA715658	iM21B1	Chicken	Austria
SRR14687325	PRJNA715658	iM21A4	Chicken	Austria
SRR14687326	PRJNA715658	fD3C3	Chicken	Austria
SRR14687327	PRJNA715658	iM21A3	Chicken	Austria
SRR14687328	PRJNA715658	iM21A2	Chicken	Austria
SRR14687329	PRJNA715658	iM21A1	Chicken	Austria
SRR14687330	PRJNA715658	iD21F4	Chicken	Austria
SRR14687331	PRJNA715658	iD21F3	Chicken	Austria
SRR14687332	PRJNA715658	iD21F2	Chicken	Austria
SRR14687333	PRJNA715658	iD21F1	Chicken	Austria
SRR14687334	PRJNA715658	iD21E4	Chicken	Austria
SRR14687335	PRJNA715658	iD21E3	Chicken	Austria
SRR14687336	PRJNA715658	iD21E2	Chicken	Austria
SRR14687337	PRJNA715658	fD3C1	Chicken	Austria
SRR14687338	PRJNA715658	iD21E1	Chicken	Austria
SRR14687339	PRJNA715658	iD21D4	Chicken	Austria
SRR14687340	PRJNA715658	iD21D3	Chicken	Austria
SRR14687341	PRJNA715658	iD3B4	Chicken	Austria
SRR14687342	PRJNA715658	iD3B3	Chicken	Austria
SRR14687343	PRJNA715658	iD3B2	Chicken	Austria
SRR14687344	PRJNA715658	iD3B1	Chicken	Austria
SRR14687345	PRJNA715658	iD3A4	Chicken	Austria
SRR14687346	PRJNA715658	iD3A3	Chicken	Austria
SRR14687347	PRJNA715658	iD3A2	Chicken	Austria
SRR14687348	PRJNA715658	iD3A1	Chicken	Austria
SRR14687349	PRJNA715658	fM3F4	Chicken	Austria
SRR14687350	PRJNA715658	fM3F3	Chicken	Austria
SRR14687351	PRJNA715658	cD3C2	Chicken	Austria
SRR14687352	PRJNA715658	fM3F2	Chicken	Austria
SRR14687353	PRJNA715658	fM3F1	Chicken	Austria
SRR14687354	PRJNA715658	fM3E4	Chicken	Austria
SRR14687355	PRJNA715658	fM3E3	Chicken	Austria
SRR14687356	PRJNA715658	sS35F4	Chicken	Austria
SRR14687357	PRJNA715658	fM3E2	Chicken	Austria
SRR14687358	PRJNA715658	sS35F3	Chicken	Austria
SRR14687359	PRJNA715658	sS35F2	Chicken	Austria
SRR14687360	PRJNA715658	sS35F1	Chicken	Austria
SRR14687361	PRJNA715658	sS35E4	Chicken	Austria
SRR14687362	PRJNA715658	sS35E3	Chicken	Austria
SRR14687363	PRJNA715658	sS35E2	Chicken	Austria
SRR14687364	PRJNA715658	sS35E1	Chicken	Austria
SRR14687365	PRJNA715658	sS35D4	Chicken	Austria
SRR14687366	PRJNA715658	sS35D3	Chicken	Austria
SRR14687367	PRJNA715658	sS35D2	Chicken	Austria
SRR14687368	PRJNA715658	fM3E1	Chicken	Austria
SRR14687369	PRJNA715658	sS35D1	Chicken	Austria
SRR14687370	PRJNA715658	sS35C4	Chicken	Austria
SRR14687371	PRJNA715658	sS35C3	Chicken	Austria
SRR14687372	PRJNA715658	sS35C2	Chicken	Austria
SRR14687373	PRJNA715658	cM14D3	Chicken	Austria
SRR14687374	PRJNA715658	cM14D2	Chicken	Austria
SRR14687375	PRJNA715658	cM14D1	Chicken	Austria
SRR14687376	PRJNA715658	cM14C4	Chicken	Austria
SRR14687377	PRJNA715658	cM14C3	Chicken	Austria
SRR14687378	PRJNA715658	cM14C2	Chicken	Austria
SRR14687379	PRJNA715658	cM14C1	Chicken	Austria
SRR14687380	PRJNA715658	cD3F4	Chicken	Austria
SRR14687381	PRJNA715658	cM14B4	Chicken	Austria
SRR14687382	PRJNA715658	cM14B3	Chicken	Austria
SRR14687383	PRJNA715658	cM14B2	Chicken	Austria
SRR14687384	PRJNA715658	cM14B1	Chicken	Austria
SRR14687385	PRJNA715658	cM14A4	Chicken	Austria
SRR14687386	PRJNA715658	cM14A3	Chicken	Austria
SRR14687387	PRJNA715658	cM14A2	Chicken	Austria
SRR14687388	PRJNA715658	cM14A1	Chicken	Austria
SRR14687389	PRJNA715658	cD14F4	Chicken	Austria
SRR14687390	PRJNA715658	cD14F3	Chicken	Austria
SRR14687391	PRJNA715658	cD3F3	Chicken	Austria
SRR14687392	PRJNA715658	cD3A4	Chicken	Austria
SRR14687393	PRJNA715658	cD14F2	Chicken	Austria
SRR14687394	PRJNA715658	cD14F1	Chicken	Austria
SRR14687395	PRJNA715658	cD14E4	Chicken	Austria
SRR14687396	PRJNA715658	cD14E3	Chicken	Austria
SRR14687397	PRJNA715658	cD14E2	Chicken	Austria
SRR14687398	PRJNA715658	cD14E1	Chicken	Austria
SRR14687399	PRJNA715658	cD14D4	Chicken	Austria
SRR14687400	PRJNA715658	cD14D3	Chicken	Austria
SRR14687401	PRJNA715658	cD14D2	Chicken	Austria
SRR14687402	PRJNA715658	cD14D1	Chicken	Austria
SRR14687403	PRJNA715658	cD3F2	Chicken	Austria
SRR14687404	PRJNA715658	cD14C4	Chicken	Austria
SRR14687405	PRJNA715658	iD21D2	Chicken	Austria
SRR14687406	PRJNA715658	iD21D1	Chicken	Austria
SRR14687407	PRJNA715658	iD21C4	Chicken	Austria
SRR14687408	PRJNA715658	iD21C3	Chicken	Austria
SRR14687409	PRJNA715658	iD21C2	Chicken	Austria
SRR14687410	PRJNA715658	iD21C1	Chicken	Austria
SRR14687411	PRJNA715658	iD21B4	Chicken	Austria
SRR14687412	PRJNA715658	fD3B3	Chicken	Austria
SRR14687413	PRJNA715658	iD21B3	Chicken	Austria
SRR14687414	PRJNA715658	iD21B2	Chicken	Austria
SRR14687415	PRJNA715658	iD21B1	Chicken	Austria
SRR14687416	PRJNA715658	iD21A4	Chicken	Austria
SRR14687417	PRJNA715658	iD21A3	Chicken	Austria
SRR14687418	PRJNA715658	iD21A2	Chicken	Austria
SRR14687419	PRJNA715658	iD21A1	Chicken	Austria
SRR14687420	PRJNA715658	fM21F4	Chicken	Austria
SRR14687421	PRJNA715658	fM21F3	Chicken	Austria
SRR14687422	PRJNA715658	fM21F2	Chicken	Austria
SRR14687423	PRJNA715658	fD3A2	Chicken	Austria
SRR14687424	PRJNA715658	fM21F1	Chicken	Austria
SRR14687425	PRJNA715658	fM21E4	Chicken	Austria
SRR14687426	PRJNA715658	fM21E3	Chicken	Austria
SRR14687427	PRJNA715658	fM21E2	Chicken	Austria
SRR14687428	PRJNA715658	fM21E1	Chicken	Austria
SRR14687429	PRJNA715658	fM21D4	Chicken	Austria
SRR14687430	PRJNA715658	fM21D3	Chicken	Austria
SRR14687431	PRJNA715658	fM21D2	Chicken	Austria
SRR14687432	PRJNA715658	fM21D1	Chicken	Austria
SRR14687433	PRJNA715658	fM21C4	Chicken	Austria
SRR14687434	PRJNA715658	cM3F4	Chicken	Austria
SRR14687435	PRJNA715658	fM21C3	Chicken	Austria
SRR14687436	PRJNA715658	fM21C2	Chicken	Austria
SRR14687437	PRJNA715658	sS35C1	Chicken	Austria
SRR14687438	PRJNA715658	sS35B4	Chicken	Austria
SRR14687439	PRJNA715658	sS35B3	Chicken	Austria
SRR14687440	PRJNA715658	sS35B2	Chicken	Austria
SRR14687441	PRJNA715658	sS35B1	Chicken	Austria
SRR14687442	PRJNA715658	sS35A4	Chicken	Austria
SRR14687443	PRJNA715658	fM3D4	Chicken	Austria
SRR14687444	PRJNA715658	sS35A3	Chicken	Austria
SRR14687445	PRJNA715658	sS35A2	Chicken	Austria
SRR14687446	PRJNA715658	sS35A1	Chicken	Austria
SRR14687447	PRJNA715658	sM35F4	Chicken	Austria
SRR14687448	PRJNA715658	sM35F3	Chicken	Austria
SRR14687449	PRJNA715658	sM35F2	Chicken	Austria
SRR14687450	PRJNA715658	sM35F1	Chicken	Austria
SRR14687451	PRJNA715658	sM35E4	Chicken	Austria
SRR14687452	PRJNA715658	sM35E3	Chicken	Austria
SRR14687453	PRJNA715658	sM35E2	Chicken	Austria
SRR14687454	PRJNA715658	fM3D3	Chicken	Austria
SRR14687455	PRJNA715658	sM35E1	Chicken	Austria
SRR14687456	PRJNA715658	sM35D4	Chicken	Austria
SRR14687457	PRJNA715658	sM35D3	Chicken	Austria
SRR14687458	PRJNA715658	sM35D2	Chicken	Austria
SRR14687459	PRJNA715658	sM35D1	Chicken	Austria
SRR14687460	PRJNA715658	sM35C4	Chicken	Austria
SRR14687461	PRJNA715658	sM35C3	Chicken	Austria
SRR14687462	PRJNA715658	sM35C2	Chicken	Austria
SRR14687463	PRJNA715658	sM35C1	Chicken	Austria
SRR14687464	PRJNA715658	sM35B4	Chicken	Austria
SRR14687465	PRJNA715658	fM3D2	Chicken	Austria
SRR14687466	PRJNA715658	sM35B3	Chicken	Austria
SRR14687467	PRJNA715658	sM35B2	Chicken	Austria
SRR14687468	PRJNA715658	sM35B1	Chicken	Austria
SRR14687469	PRJNA715658	fM21C1	Chicken	Austria
SRR14687470	PRJNA715658	fM21B4	Chicken	Austria
SRR14687471	PRJNA715658	fM21B3	Chicken	Austria
SRR14687472	PRJNA715658	fM21B2	Chicken	Austria
SRR14687473	PRJNA715658	fM21B1	Chicken	Austria
SRR14687474	PRJNA715658	fM21A4	Chicken	Austria
SRR14687475	PRJNA715658	fM21A3	Chicken	Austria
SRR14687476	PRJNA715658	fM21A2	Chicken	Austria
SRR14687477	PRJNA715658	cM3F3	Chicken	Austria
SRR14687478	PRJNA715658	fM21A1	Chicken	Austria
SRR14687479	PRJNA715658	fD21F4	Chicken	Austria
SRR14687480	PRJNA715658	fD21F3	Chicken	Austria
SRR14687481	PRJNA715658	fD21F2	Chicken	Austria
SRR14687482	PRJNA715658	fD21F1	Chicken	Austria
SRR14687483	PRJNA715658	fD21E4	Chicken	Austria
SRR14687484	PRJNA715658	fD21E3	Chicken	Austria
SRR14687485	PRJNA715658	fD21E2	Chicken	Austria
SRR14687486	PRJNA715658	fD21E1	Chicken	Austria
SRR14687487	PRJNA715658	fD21D4	Chicken	Austria
SRR14687488	PRJNA715658	cM3F2	Chicken	Austria
SRR14687489	PRJNA715658	fD21D3	Chicken	Austria
SRR14687490	PRJNA715658	fD21D2	Chicken	Austria
SRR14687491	PRJNA715658	fD21D1	Chicken	Austria
SRR14687492	PRJNA715658	fD21C3	Chicken	Austria
SRR14687493	PRJNA715658	fD21C1	Chicken	Austria
SRR14687494	PRJNA715658	fD21B4	Chicken	Austria
SRR14687495	PRJNA715658	fD21B3	Chicken	Austria
SRR14687496	PRJNA715658	fD21B2	Chicken	Austria
SRR14687497	PRJNA715658	fD21B1	Chicken	Austria
SRR14687498	PRJNA715658	fD21A4	Chicken	Austria
SRR14687499	PRJNA715658	cM3F1	Chicken	Austria
SRR14687500	PRJNA715658	fD21A3	Chicken	Austria
SRR14687501	PRJNA715658	cD14C3	Chicken	Austria
SRR14687502	PRJNA715658	cD14C2	Chicken	Austria
SRR14687503	PRJNA715658	cD14C1	Chicken	Austria
SRR14687504	PRJNA715658	cD14B4	Chicken	Austria
SRR14687505	PRJNA715658	cD14B3	Chicken	Austria
SRR14687506	PRJNA715658	cD14B2	Chicken	Austria
SRR14687507	PRJNA715658	cD14B1	Chicken	Austria
SRR14687508	PRJNA715658	cD14A4	Chicken	Austria
SRR14687509	PRJNA715658	cD14A3	Chicken	Austria
SRR14687510	PRJNA715658	cD3F1	Chicken	Austria
SRR14687511	PRJNA715658	cD14A2	Chicken	Austria
SRR14687512	PRJNA715658	cD14A1	Chicken	Austria
SRR14687513	PRJNA715658	sS3F4	Chicken	Austria
SRR14687514	PRJNA715658	sS3F3	Chicken	Austria
SRR14687515	PRJNA715658	sS3F2	Chicken	Austria
SRR14687516	PRJNA715658	sS3F1	Chicken	Austria
SRR14687517	PRJNA715658	sS3E4	Chicken	Austria
SRR14687518	PRJNA715658	sS3E3	Chicken	Austria
SRR14687519	PRJNA715658	sS3E2	Chicken	Austria
SRR14687520	PRJNA715658	sS3E1	Chicken	Austria
SRR14687521	PRJNA715658	cD3E4	Chicken	Austria
SRR14687522	PRJNA715658	sS3D4	Chicken	Austria
SRR14687523	PRJNA715658	sS3D3	Chicken	Austria
SRR14687524	PRJNA715658	sS3D2	Chicken	Austria
SRR14687525	PRJNA715658	sS3D1	Chicken	Austria
SRR14687526	PRJNA715658	sS3C4	Chicken	Austria
SRR14687527	PRJNA715658	sS3C3	Chicken	Austria
SRR14687528	PRJNA715658	sS3C2	Chicken	Austria
SRR14687529	PRJNA715658	sS3C1	Chicken	Austria
SRR14687530	PRJNA715658	sS3B4	Chicken	Austria
SRR14687531	PRJNA715658	sS3B3	Chicken	Austria
SRR14687532	PRJNA715658	cD3E3	Chicken	Austria
SRR14687533	PRJNA715658	sM35A4	Chicken	Austria
SRR14687534	PRJNA715658	sM35A3	Chicken	Austria
SRR14687535	PRJNA715658	sM35A2	Chicken	Austria
SRR14687536	PRJNA715658	sM35A1	Chicken	Austria
SRR14687537	PRJNA715658	iM35F4	Chicken	Austria
SRR14687538	PRJNA715658	iM35F3	Chicken	Austria
SRR14687539	PRJNA715658	iM35F2	Chicken	Austria
SRR14687540	PRJNA715658	fM3D1	Chicken	Austria
SRR14687541	PRJNA715658	cD3C1	Chicken	Austria
SRR14687542	PRJNA715658	iM35F1	Chicken	Austria
SRR14687543	PRJNA715658	iM35E4	Chicken	Austria
SRR14687544	PRJNA715658	iM35E3	Chicken	Austria
SRR14687545	PRJNA715658	iM35E2	Chicken	Austria
SRR14687546	PRJNA715658	iM35E1	Chicken	Austria
SRR14687547	PRJNA715658	iM35D4	Chicken	Austria
SRR14687548	PRJNA715658	iM35D3	Chicken	Austria
SRR14687549	PRJNA715658	iM35D2	Chicken	Austria
SRR14687550	PRJNA715658	iM35D1	Chicken	Austria
SRR14687551	PRJNA715658	iM35C4	Chicken	Austria
SRR14687552	PRJNA715658	fM3C4	Chicken	Austria
SRR14687553	PRJNA715658	iM35C3	Chicken	Austria
SRR14687554	PRJNA715658	iM35C2	Chicken	Austria
SRR14687555	PRJNA715658	iM35C1	Chicken	Austria
SRR14687556	PRJNA715658	iM35B4	Chicken	Austria
SRR14687557	PRJNA715658	iM35B3	Chicken	Austria
SRR14687558	PRJNA715658	iM35B2	Chicken	Austria
SRR14687559	PRJNA715658	iM35B1	Chicken	Austria
SRR14687560	PRJNA715658	iM35A4	Chicken	Austria
SRR14687561	PRJNA715658	iM35A3	Chicken	Austria
SRR14687562	PRJNA715658	iM35A2	Chicken	Austria
SRR14687563	PRJNA715658	fM3C3	Chicken	Austria
SRR14687564	PRJNA715658	iM35A1	Chicken	Austria
SRR14687565	PRJNA715658	sS3B2	Chicken	Austria
SRR14687566	PRJNA715658	sS3B1	Chicken	Austria
SRR14687567	PRJNA715658	sS3A4	Chicken	Austria
SRR14687568	PRJNA715658	sS3A3	Chicken	Austria
SRR14687569	PRJNA715658	sS3A2	Chicken	Austria
SRR14687570	PRJNA715658	sS3A1	Chicken	Austria
SRR14687571	PRJNA715658	sM3F4	Chicken	Austria
SRR14687572	PRJNA715658	sM3F3	Chicken	Austria
SRR14687573	PRJNA715658	sM3F2	Chicken	Austria
SRR14687574	PRJNA715658	sM3F1	Chicken	Austria
SRR14687575	PRJNA715658	cD3E2	Chicken	Austria
SRR14687576	PRJNA715658	sM3E4	Chicken	Austria
SRR14687577	PRJNA715658	sM3E3	Chicken	Austria
SRR14687578	PRJNA715658	sM3E2	Chicken	Austria
SRR14687579	PRJNA715658	sM3E1	Chicken	Austria
SRR14687580	PRJNA715658	sM3D4	Chicken	Austria
SRR14687581	PRJNA715658	sM3D3	Chicken	Austria
SRR14687582	PRJNA715658	sM3D2	Chicken	Austria
SRR14687583	PRJNA715658	sM3D1	Chicken	Austria
SRR14687584	PRJNA715658	sM3C4	Chicken	Austria
SRR14687585	PRJNA715658	sM3C3	Chicken	Austria
SRR14687586	PRJNA715658	cD3D4	Chicken	Austria
SRR14687587	PRJNA715658	sM3C2	Chicken	Austria
SRR14687588	PRJNA715658	sM3C1	Chicken	Austria
SRR14687589	PRJNA715658	sM3B4	Chicken	Austria
SRR14687590	PRJNA715658	sM3B3	Chicken	Austria
SRR14687591	PRJNA715658	sM3B2	Chicken	Austria
SRR14687592	PRJNA715658	sM3B1	Chicken	Austria
SRR14687593	PRJNA715658	sM3A4	Chicken	Austria
SRR14687594	PRJNA715658	sM3A3	Chicken	Austria
SRR14687595	PRJNA715658	sM3A2	Chicken	Austria
SRR14687596	PRJNA715658	sM3A1	Chicken	Austria
SRR14687597	PRJNA715658	fD21A2	Chicken	Austria
SRR14687598	PRJNA715658	fD21A1	Chicken	Austria
SRR14687599	PRJNA715658	cM21F4	Chicken	Austria
SRR14687600	PRJNA715658	cM21F3	Chicken	Austria
SRR14687601	PRJNA715658	cM21F2	Chicken	Austria
SRR14687602	PRJNA715658	cM21F1	Chicken	Austria
SRR14687603	PRJNA715658	cM21E4	Chicken	Austria
SRR14687604	PRJNA715658	cM21E3	Chicken	Austria
SRR14687605	PRJNA715658	cM21E2	Chicken	Austria
SRR14687606	PRJNA715658	cM3E4	Chicken	Austria
SRR14687607	PRJNA715658	cM21E1	Chicken	Austria
SRR14687608	PRJNA715658	cM21D4	Chicken	Austria
SRR14687609	PRJNA715658	cM21D3	Chicken	Austria
SRR14687610	PRJNA715658	cM21D2	Chicken	Austria
SRR14687611	PRJNA715658	cM21D1	Chicken	Austria
SRR14687612	PRJNA715658	cM21C4	Chicken	Austria
SRR14687613	PRJNA715658	cM21C3	Chicken	Austria
SRR14687614	PRJNA715658	cM21C2	Chicken	Austria
SRR14687615	PRJNA715658	cM21C1	Chicken	Austria
SRR14687616	PRJNA715658	cM21B4	Chicken	Austria
SRR14687617	PRJNA715658	cM3E3	Chicken	Austria
SRR14687618	PRJNA715658	cD3B2	Chicken	Austria
SRR14687619	PRJNA715658	cM21B3	Chicken	Austria
SRR14687620	PRJNA715658	cM21B2	Chicken	Austria
SRR14687621	PRJNA715658	cM21B1	Chicken	Austria
SRR14687622	PRJNA715658	cM21A4	Chicken	Austria
SRR14687623	PRJNA715658	cM21A3	Chicken	Austria
SRR14687624	PRJNA715658	cM21A2	Chicken	Austria
SRR14687625	PRJNA715658	cM21A1	Chicken	Austria
SRR14687626	PRJNA715658	cD21F4	Chicken	Austria
SRR14687627	PRJNA715658	cD21F3	Chicken	Austria
SRR14687628	PRJNA715658	cD21F2	Chicken	Austria
SRR14687629	PRJNA715658	iD35F4	Chicken	Austria
SRR14687630	PRJNA715658	iD35F3	Chicken	Austria
SRR14687631	PRJNA715658	iD35F2	Chicken	Austria
SRR14687632	PRJNA715658	iD35F1	Chicken	Austria
SRR14687633	PRJNA715658	iD35E4	Chicken	Austria
SRR14687634	PRJNA715658	iD35E3	Chicken	Austria
SRR14687635	PRJNA715658	iD35E2	Chicken	Austria
SRR14687636	PRJNA715658	iD35E1	Chicken	Austria
SRR14687637	PRJNA715658	iD35D4	Chicken	Austria
SRR14687638	PRJNA715658	fM3C2	Chicken	Austria
SRR14687639	PRJNA715658	iD35D3	Chicken	Austria
SRR14687640	PRJNA715658	iD35D2	Chicken	Austria
SRR14687641	PRJNA715658	iD35D1	Chicken	Austria
SRR14687642	PRJNA715658	iD35C4	Chicken	Austria
SRR14687643	PRJNA715658	iD35C3	Chicken	Austria
SRR14687644	PRJNA715658	iD35C2	Chicken	Austria
SRR14687645	PRJNA715658	iD35C1	Chicken	Austria
SRR14687646	PRJNA715658	iD35B4	Chicken	Austria
SRR14687647	PRJNA715658	iD35B3	Chicken	Austria
SRR14687648	PRJNA715658	iD35B2	Chicken	Austria
SRR14687649	PRJNA715658	iD14A2	Chicken	Austria
SRR14687650	PRJNA715658	iD14A1	Chicken	Austria
SRR14687651	PRJNA715658	fM14F4	Chicken	Austria
SRR14687652	PRJNA715658	fM14F3	Chicken	Austria
SRR14687653	PRJNA715658	fM14F2	Chicken	Austria
SRR14687654	PRJNA715658	cM3B2	Chicken	Austria
SRR14687655	PRJNA715658	fM14F1	Chicken	Austria
SRR14687656	PRJNA715658	fM14E4	Chicken	Austria
SRR14687657	PRJNA715658	fM14E3	Chicken	Austria
SRR14687658	PRJNA715658	fM14E2	Chicken	Austria
SRR14687659	PRJNA715658	fM14E1	Chicken	Austria
SRR14687660	PRJNA715658	fM14D4	Chicken	Austria
SRR14687661	PRJNA715658	fM14D3	Chicken	Austria
SRR14687662	PRJNA715658	fM14D2	Chicken	Austria
SRR14687663	PRJNA715658	fM14D1	Chicken	Austria
SRR14687664	PRJNA715658	fM14C4	Chicken	Austria
SRR14687665	PRJNA715658	cM3B1	Chicken	Austria
SRR14687666	PRJNA715658	fM14C3	Chicken	Austria
SRR14687667	PRJNA715658	fM14C2	Chicken	Austria
SRR14687668	PRJNA715658	fM14C1	Chicken	Austria
SRR14687669	PRJNA715658	fM14B4	Chicken	Austria
SRR14687670	PRJNA715658	fM14B3	Chicken	Austria
SRR14687671	PRJNA715658	fM14B2	Chicken	Austria
SRR14687672	PRJNA715658	fM14B1	Chicken	Austria
SRR14687673	PRJNA715658	fM14A4	Chicken	Austria
SRR14687674	PRJNA715658	fM14A3	Chicken	Austria
SRR14687675	PRJNA715658	fM14A2	Chicken	Austria
SRR14687676	PRJNA715658	cM3A4	Chicken	Austria
SRR14687677	PRJNA715658	fM14A1	Chicken	Austria
SRR14687678	PRJNA715658	fD14F4	Chicken	Austria
SRR14687679	PRJNA715658	fD14F2	Chicken	Austria
SRR14687680	PRJNA715658	fD14F1	Chicken	Austria
SRR14687681	PRJNA715658	fD14E4	Chicken	Austria
SRR14687682	PRJNA715658	fD14E3	Chicken	Austria
SRR14687683	PRJNA715658	fD14E2	Chicken	Austria
SRR14687684	PRJNA715658	fD14E1	Chicken	Austria
SRR14687685	PRJNA715658	fD14D4	Chicken	Austria
SRR14687686	PRJNA715658	fD14D3	Chicken	Austria
SRR14687687	PRJNA715658	cM3A3	Chicken	Austria
SRR14687688	PRJNA715658	fD14D2	Chicken	Austria
SRR14687689	PRJNA715658	fD14D1	Chicken	Austria
SRR14687690	PRJNA715658	fD14C4	Chicken	Austria
SRR14687691	PRJNA715658	fD14C3	Chicken	Austria
SRR14687692	PRJNA715658	fD14C2	Chicken	Austria
SRR14687693	PRJNA715658	fD14C1	Chicken	Austria
SRR14687694	PRJNA715658	fD14B4	Chicken	Austria
SRR14687695	PRJNA715658	fD14B3	Chicken	Austria
SRR14687696	PRJNA715658	fD14B2	Chicken	Austria
SRR14687697	PRJNA715658	fD14B1	Chicken	Austria
SRR14687698	PRJNA715658	cM3A2	Chicken	Austria
SRR14687699	PRJNA715658	fD14A4	Chicken	Austria
SRR14687700	PRJNA715658	fD14A3	Chicken	Austria
SRR14687701	PRJNA715658	fD14A2	Chicken	Austria
SRR14687702	PRJNA715658	fD14A1	Chicken	Austria
SRR14687703	PRJNA715658	cM14F4	Chicken	Austria
SRR14687704	PRJNA715658	cM14F3	Chicken	Austria
SRR14687705	PRJNA715658	cM14F2	Chicken	Austria
SRR14687706	PRJNA715658	cM14F1	Chicken	Austria
SRR14687707	PRJNA715658	cM14E4	Chicken	Austria
SRR14687708	PRJNA715658	cM14E3	Chicken	Austria
SRR14687709	PRJNA715658	cM3A1	Chicken	Austria
SRR14687710	PRJNA715658	cM14E2	Chicken	Austria
SRR14687711	PRJNA715658	cM14E1	Chicken	Austria
SRR14687712	PRJNA715658	cM14D4	Chicken	Austria
SRR14687713	PRJNA715658	iD3E2	Chicken	Austria
SRR14687714	PRJNA715658	iD3E1	Chicken	Austria
SRR14687715	PRJNA715658	iD3D4	Chicken	Austria
SRR14687716	PRJNA715658	iD3D3	Chicken	Austria
SRR14687717	PRJNA715658	iD3D2	Chicken	Austria
SRR14687718	PRJNA715658	iD3D1	Chicken	Austria
SRR14687719	PRJNA715658	iD3C4	Chicken	Austria
SRR14687720	PRJNA715658	iD3C3	Chicken	Austria
SRR14687721	PRJNA715658	iD3C2	Chicken	Austria
SRR14687722	PRJNA715658	iD3C1	Chicken	Austria
SRR14687723	PRJNA715658	cD3C3	Chicken	Austria
SRR14687724	PRJNA715658	iM21E2	Chicken	Austria
SRR14687725	PRJNA715658	iM21E1	Chicken	Austria
SRR14687726	PRJNA715658	iM21D4	Chicken	Austria
SRR14687727	PRJNA715658	iM21D3	Chicken	Austria
SRR14687728	PRJNA715658	fM3C1	Chicken	Austria
SRR14687729	PRJNA715658	iD35B1	Chicken	Austria
SRR14687730	PRJNA715658	iD35A4	Chicken	Austria
SRR14687731	PRJNA715658	iD35A3	Chicken	Austria
SRR14687732	PRJNA715658	iD35A2	Chicken	Austria
SRR14687733	PRJNA715658	iD35A1	Chicken	Austria
SRR14687734	PRJNA715658	fM35F4	Chicken	Austria
SRR14687735	PRJNA715658	fM35F3	Chicken	Austria
SRR14687736	PRJNA715658	fM35F2	Chicken	Austria
SRR14687737	PRJNA715658	fM35F1	Chicken	Austria
SRR14687738	PRJNA715658	fM35E4	Chicken	Austria
SRR14687739	PRJNA715658	fM3B4	Chicken	Austria
SRR14687740	PRJNA715658	cM3E2	Chicken	Austria
SRR14687741	PRJNA715658	cD21F1	Chicken	Austria
SRR14687742	PRJNA715658	cD21E4	Chicken	Austria
SRR14687743	PRJNA715658	cD21E3	Chicken	Austria
SRR14687744	PRJNA715658	cD21E2	Chicken	Austria
SRR14687745	PRJNA715658	cD21E1	Chicken	Austria
SRR14687746	PRJNA715658	cD21D4	Chicken	Austria
SRR14687747	PRJNA715658	cD21D3	Chicken	Austria
SRR14687748	PRJNA715658	cD21D2	Chicken	Austria
SRR14687749	PRJNA715658	cD21D1	Chicken	Austria
SRR14687750	PRJNA715658	cD21C4	Chicken	Austria
SRR14687751	PRJNA715658	cM3E1	Chicken	Austria
SRR14687752	PRJNA715658	cD21C3	Chicken	Austria
SRR14687753	PRJNA715658	cD21C2	Chicken	Austria
SRR14687754	PRJNA715658	cD21C1	Chicken	Austria
SRR14687755	PRJNA715658	cD21B4	Chicken	Austria
SRR14687756	PRJNA715658	cD21B3	Chicken	Austria
SRR14687757	PRJNA715658	cD21B2	Chicken	Austria
SRR14687758	PRJNA715658	cD21B1	Chicken	Austria
SRR14687759	PRJNA715658	cD21A4	Chicken	Austria
SRR14687760	PRJNA715658	cD21A3	Chicken	Austria
SRR14687761	PRJNA715658	cD21A2	Chicken	Austria
SRR14687762	PRJNA715658	cM3D4	Chicken	Austria
SRR14687763	PRJNA715658	cD21A1	Chicken	Austria
SRR14687764	PRJNA715658	sS14F4	Chicken	Austria
SRR14687765	PRJNA715658	sS14F3	Chicken	Austria
SRR14687766	PRJNA715658	sS14F2	Chicken	Austria
SRR14687767	PRJNA715658	sS14F1	Chicken	Austria
SRR14687768	PRJNA715658	sS14E4	Chicken	Austria
SRR14687769	PRJNA715658	sS14E3	Chicken	Austria
SRR14687770	PRJNA715658	sS14E2	Chicken	Austria
SRR14687771	PRJNA715658	sS14E1	Chicken	Austria
SRR14687772	PRJNA715658	sS14D4	Chicken	Austria
SRR14687773	PRJNA715658	cM3D3	Chicken	Austria
SRR14687774	PRJNA715658	sS14D3	Chicken	Austria
SRR14687775	PRJNA715658	sS14D2	Chicken	Austria
SRR14687776	PRJNA715658	sS14D1	Chicken	Austria
SRR14687777	PRJNA715658	sS14C4	Chicken	Austria
SRR14687778	PRJNA715658	sS14C3	Chicken	Austria
SRR14687779	PRJNA715658	sS14C2	Chicken	Austria
SRR14687780	PRJNA715658	sS14C1	Chicken	Austria
SRR14687781	PRJNA715658	sS14B4	Chicken	Austria
SRR14687782	PRJNA715658	sS14B3	Chicken	Austria
SRR14687783	PRJNA715658	sS14B2	Chicken	Austria
SRR14687784	PRJNA715658	cM3D2	Chicken	Austria
SRR14687785	PRJNA715658	sS14B1	Chicken	Austria
SRR14687786	PRJNA715658	sS14A4	Chicken	Austria
SRR14687787	PRJNA715658	sS14A3	Chicken	Austria
SRR14687788	PRJNA715658	sS14A2	Chicken	Austria
SRR14687789	PRJNA715658	sS14A1	Chicken	Austria
SRR14687790	PRJNA715658	sM14F4	Chicken	Austria
SRR14687791	PRJNA715658	sM14F3	Chicken	Austria
SRR14687792	PRJNA715658	sM14F2	Chicken	Austria
SRR14687793	PRJNA715658	sM14F1	Chicken	Austria
SRR14687794	PRJNA715658	sM14E4	Chicken	Austria
SRR14687795	PRJNA715658	cM3D1	Chicken	Austria
SRR14687796	PRJNA715658	sM14E3	Chicken	Austria
SRR14687797	PRJNA715658	sM14E2	Chicken	Austria
SRR14687798	PRJNA715658	sM14E1	Chicken	Austria
SRR14687799	PRJNA715658	sM14D4	Chicken	Austria
SRR14687800	PRJNA715658	sM14D3	Chicken	Austria
SRR14687801	PRJNA715658	sM14D2	Chicken	Austria
SRR14687802	PRJNA715658	sM14D1	Chicken	Austria
SRR14687803	PRJNA715658	sM14C4	Chicken	Austria
SRR14687804	PRJNA715658	cD3D3	Chicken	Austria
SRR14687805	PRJNA715658	iM3F4	Chicken	Austria
SRR14687806	PRJNA715658	iM3F3	Chicken	Austria
SRR14687807	PRJNA715658	iM3F2	Chicken	Austria
SRR14687808	PRJNA715658	iM3F1	Chicken	Austria
SRR14687809	PRJNA715658	iM3E4	Chicken	Austria
SRR14687810	PRJNA715658	iM3E3	Chicken	Austria
SRR14687811	PRJNA715658	iM3E2	Chicken	Austria
SRR14687812	PRJNA715658	iM3E1	Chicken	Austria
SRR14687813	PRJNA715658	iM3D4	Chicken	Austria
SRR14687814	PRJNA715658	iM3D3	Chicken	Austria
SRR14687815	PRJNA715658	cD3D2	Chicken	Austria
SRR14687816	PRJNA715658	iM3D2	Chicken	Austria
SRR14687817	PRJNA715658	iM3D1	Chicken	Austria
SRR14687818	PRJNA715658	iM3C4	Chicken	Austria
SRR14687819	PRJNA715658	iM3C3	Chicken	Austria
SRR14687820	PRJNA715658	iM3C2	Chicken	Austria
SRR14687821	PRJNA715658	iM3C1	Chicken	Austria
SRR14687822	PRJNA715658	iM3B4	Chicken	Austria
SRR14687823	PRJNA715658	iM3B3	Chicken	Austria
SRR14687824	PRJNA715658	iM3B2	Chicken	Austria
SRR14687825	PRJNA715658	iM3B1	Chicken	Austria
SRR14687826	PRJNA715658	cD3D1	Chicken	Austria
SRR14687827	PRJNA715658	iM3A4	Chicken	Austria
SRR14687828	PRJNA715658	iM3A3	Chicken	Austria
SRR14687829	PRJNA715658	iM3A2	Chicken	Austria
SRR14687830	PRJNA715658	iM3A1	Chicken	Austria
SRR14687831	PRJNA715658	iD3F4	Chicken	Austria
SRR14687832	PRJNA715658	iD3F3	Chicken	Austria
SRR14687833	PRJNA715658	iD3F2	Chicken	Austria
SRR14687834	PRJNA715658	iD3F1	Chicken	Austria
SRR14687835	PRJNA715658	iD3E4	Chicken	Austria
SRR14687836	PRJNA715658	fM35E3	Chicken	Austria
SRR14687837	PRJNA715658	fM35E2	Chicken	Austria
SRR14687838	PRJNA715658	fM35E1	Chicken	Austria
SRR14687839	PRJNA715658	fM35D4	Chicken	Austria
SRR14687840	PRJNA715658	fM35D3	Chicken	Austria
SRR14687841	PRJNA715658	fM35D2	Chicken	Austria
SRR14687842	PRJNA715658	fM35D1	Chicken	Austria
SRR14687843	PRJNA715658	fM35C4	Chicken	Austria
SRR14687844	PRJNA715658	fM35C3	Chicken	Austria
SRR14687845	PRJNA715658	fM35C2	Chicken	Austria
SRR14687846	PRJNA715658	fM3B3	Chicken	Austria
SRR14687847	PRJNA715658	fM35C1	Chicken	Austria
SRR14687848	PRJNA715658	fM35B4	Chicken	Austria
SRR14687849	PRJNA715658	fM35B3	Chicken	Austria
SRR14687850	PRJNA715658	fM35B2	Chicken	Austria
SRR14687851	PRJNA715658	fM35B1	Chicken	Austria
SRR14687852	PRJNA715658	fM35A4	Chicken	Austria
SRR14687853	PRJNA715658	fM35A3	Chicken	Austria
SRR14687854	PRJNA715658	fM35A2	Chicken	Austria
SRR14687855	PRJNA715658	fM35A1	Chicken	Austria
SRR14687856	PRJNA715658	fD35F4	Chicken	Austria
SRR14687857	PRJNA715658	fM3B2	Chicken	Austria
SRR14687858	PRJNA715658	fD35F3	Chicken	Austria
SRR14687859	PRJNA715658	fD35F2	Chicken	Austria
SRR14687860	PRJNA715658	fD35F1	Chicken	Austria
SRR14687861	PRJNA715658	fD35E4	Chicken	Austria
SRR14687862	PRJNA715658	fD35E3	Chicken	Austria
SRR14687863	PRJNA715658	fD35E2	Chicken	Austria
SRR14687864	PRJNA715658	fD35E1	Chicken	Austria
SRR14687865	PRJNA715658	fD35D4	Chicken	Austria
SRR14687866	PRJNA715658	fD35D3	Chicken	Austria
SRR14687867	PRJNA715658	fD35D2	Chicken	Austria
SRR14687868	PRJNA715658	fM3B1	Chicken	Austria
SRR14687869	PRJNA715658	fD35D1	Chicken	Austria
SRR14687870	PRJNA715658	fD35C4	Chicken	Austria
SRR14687871	PRJNA715658	fD35C3	Chicken	Austria
SRR14687872	PRJNA715658	fD35C2	Chicken	Austria
SRR14687873	PRJNA715658	fD35C1	Chicken	Austria
SRR14687874	PRJNA715658	fD35B4	Chicken	Austria
SRR14687875	PRJNA715658	fD35B3	Chicken	Austria
SRR14687876	PRJNA715658	fD35B2	Chicken	Austria
SRR14687877	PRJNA715658	fD35B1	Chicken	Austria
SRR14687878	PRJNA715658	fD35A4	Chicken	Austria
SRR14687879	PRJNA715658	fM3A4	Chicken	Austria
SRR14687880	PRJNA715658	fD35A3	Chicken	Austria
SRR14687881	PRJNA715658	fD35A2	Chicken	Austria
SRR14687882	PRJNA715658	fD35A1	Chicken	Austria
SRR14687883	PRJNA715658	cM35F4	Chicken	Austria
SRR14687884	PRJNA715658	cM35F3	Chicken	Austria
SRR14687885	PRJNA715658	cM35F2	Chicken	Austria
SRR14687886	PRJNA715658	cM35F1	Chicken	Austria
SRR14687887	PRJNA715658	cM35E4	Chicken	Austria
SRR14687888	PRJNA715658	cM35E3	Chicken	Austria
SRR14687889	PRJNA715658	cM35E2	Chicken	Austria
SRR14687890	PRJNA715658	fM3A3	Chicken	Austria
SRR14687891	PRJNA715658	cD3B4	Chicken	Austria
SRR14687892	PRJNA715658	cM35E1	Chicken	Austria
SRR14687893	PRJNA715658	cM35D4	Chicken	Austria
SRR14687894	PRJNA715658	cM35D3	Chicken	Austria
SRR14687895	PRJNA715658	cM35D2	Chicken	Austria
SRR14687896	PRJNA715658	cM35D1	Chicken	Austria
SRR14687897	PRJNA715658	cM35C4	Chicken	Austria
SRR14687898	PRJNA715658	cM35C3	Chicken	Austria
SRR14687899	PRJNA715658	cM35C2	Chicken	Austria
SRR14687900	PRJNA715658	cM35C1	Chicken	Austria
SRR14687901	PRJNA715658	cM35B4	Chicken	Austria
SRR14687902	PRJNA715658	fM3A2	Chicken	Austria
SRR14687903	PRJNA715658	cM35B3	Chicken	Austria
SRR14687904	PRJNA715658	cM35B2	Chicken	Austria
SRR14687905	PRJNA715658	cM35B1	Chicken	Austria
SRR14687906	PRJNA715658	cM35A4	Chicken	Austria
SRR14687907	PRJNA715658	cM35A3	Chicken	Austria
SRR14687908	PRJNA715658	cM35A2	Chicken	Austria
SRR14687909	PRJNA715658	cM35A1	Chicken	Austria
SRR14687910	PRJNA715658	cD35F4	Chicken	Austria
SRR14687911	PRJNA715658	cD35F3	Chicken	Austria
SRR14687912	PRJNA715658	cD35F2	Chicken	Austria
SRR14687913	PRJNA715658	fM3A1	Chicken	Austria
SRR14687914	PRJNA715658	cD35F1	Chicken	Austria
SRR14687915	PRJNA715658	cD35E4	Chicken	Austria
SRR14687916	PRJNA715658	cD35E3	Chicken	Austria
SRR14687917	PRJNA715658	cD35E2	Chicken	Austria
SRR14687918	PRJNA715658	cD35E1	Chicken	Austria
SRR14687919	PRJNA715658	cD35D4	Chicken	Austria
SRR14687920	PRJNA715658	cD35D3	Chicken	Austria
SRR14687921	PRJNA715658	cD35D2	Chicken	Austria
SRR14687922	PRJNA715658	cD35D1	Chicken	Austria
SRR14687923	PRJNA715658	cD35C4	Chicken	Austria
SRR14687924	PRJNA715658	fD3F4	Chicken	Austria
SRR14687925	PRJNA715658	cD35C3	Chicken	Austria
SRR14687926	PRJNA715658	cD35C2	Chicken	Austria
SRR14687927	PRJNA715658	cD35C1	Chicken	Austria
SRR14687928	PRJNA715658	cD35B4	Chicken	Austria
SRR14687929	PRJNA715658	cD35B3	Chicken	Austria
SRR14687930	PRJNA715658	cD35B2	Chicken	Austria
SRR14687931	PRJNA715658	cD35B1	Chicken	Austria
SRR14687932	PRJNA715658	sM14C3	Chicken	Austria
SRR14687933	PRJNA715658	sM14C2	Chicken	Austria
SRR14687934	PRJNA715658	cM3C4	Chicken	Austria
SRR14687935	PRJNA715658	sM14C1	Chicken	Austria
SRR14687936	PRJNA715658	sM14B4	Chicken	Austria
SRR14687937	PRJNA715658	sM14B3	Chicken	Austria
SRR14687938	PRJNA715658	sM14B2	Chicken	Austria
SRR14687939	PRJNA715658	sM14B1	Chicken	Austria
SRR14687940	PRJNA715658	sM14A4	Chicken	Austria
SRR14687941	PRJNA715658	sM14A3	Chicken	Austria
SRR14687942	PRJNA715658	sM14A2	Chicken	Austria
SRR14687943	PRJNA715658	sM14A1	Chicken	Austria
SRR14687944	PRJNA715658	iM14F4	Chicken	Austria
SRR14687945	PRJNA715658	cM3C3	Chicken	Austria
SRR14687946	PRJNA715658	iM14F3	Chicken	Austria
SRR14687947	PRJNA715658	iM14F2	Chicken	Austria
SRR14687948	PRJNA715658	iM14F1	Chicken	Austria
SRR14687949	PRJNA715658	iM14E4	Chicken	Austria
SRR14687950	PRJNA715658	iM14E3	Chicken	Austria
SRR14687951	PRJNA715658	iM14E2	Chicken	Austria
SRR14687952	PRJNA715658	iM14E1	Chicken	Austria
SRR14687953	PRJNA715658	iM14D4	Chicken	Austria
SRR14687954	PRJNA715658	iM14D3	Chicken	Austria
SRR14687955	PRJNA715658	iM14D2	Chicken	Austria
SRR14687956	PRJNA715658	cM3C2	Chicken	Austria
SRR14687957	PRJNA715658	iM14D1	Chicken	Austria
SRR14687958	PRJNA715658	iM14C4	Chicken	Austria
SRR14687959	PRJNA715658	iM14C3	Chicken	Austria
SRR14687960	PRJNA715658	iM14C2	Chicken	Austria
SRR14687961	PRJNA715658	iM14C1	Chicken	Austria
SRR14687962	PRJNA715658	iM14B4	Chicken	Austria
SRR14687963	PRJNA715658	iM14B3	Chicken	Austria
SRR14687964	PRJNA715658	cD35A4	Chicken	Austria
SRR14687965	PRJNA715658	cD35A3	Chicken	Austria
SRR14687966	PRJNA715658	cD35A2	Chicken	Austria
SRR14687967	PRJNA715658	fD3F2	Chicken	Austria
SRR14687968	PRJNA715658	cD35A1	Chicken	Austria
SRR14687969	PRJNA715658	sS21F4	Chicken	Austria
SRR14687970	PRJNA715658	sS21F3	Chicken	Austria
SRR14687971	PRJNA715658	sS21F2	Chicken	Austria
SRR14687972	PRJNA715658	sS21F1	Chicken	Austria
SRR14687973	PRJNA715658	sS21E4	Chicken	Austria
SRR14687974	PRJNA715658	sS21E3	Chicken	Austria
SRR14687975	PRJNA715658	sS21E2	Chicken	Austria
SRR14687976	PRJNA715658	sS21E1	Chicken	Austria
SRR14687977	PRJNA715658	sS21D4	Chicken	Austria
SRR14687978	PRJNA715658	fD3F1	Chicken	Austria
SRR14687979	PRJNA715658	sS21D3	Chicken	Austria
SRR14687980	PRJNA715658	sS21D2	Chicken	Austria
SRR14687981	PRJNA715658	sS21D1	Chicken	Austria
SRR14687982	PRJNA715658	sS21C4	Chicken	Austria
SRR14687983	PRJNA715658	sS21C3	Chicken	Austria
SRR14687984	PRJNA715658	sS21C2	Chicken	Austria
SRR14687985	PRJNA715658	sS21C1	Chicken	Austria
SRR14687986	PRJNA715658	sS21B4	Chicken	Austria
SRR14687987	PRJNA715658	sS21B3	Chicken	Austria
SRR14687988	PRJNA715658	sS21B2	Chicken	Austria
SRR14687989	PRJNA715658	fD3E3	Chicken	Austria
SRR14687990	PRJNA715658	sS21B1	Chicken	Austria
SRR14687991	PRJNA715658	sS21A4	Chicken	Austria
SRR14687992	PRJNA715658	sS21A3	Chicken	Austria
SRR14687993	PRJNA715658	sS21A2	Chicken	Austria
SRR14687994	PRJNA715658	sS21A1	Chicken	Austria
SRR14687995	PRJNA715658	sM21F4	Chicken	Austria
SRR14687996	PRJNA715658	iM14B2	Chicken	Austria
SRR14687997	PRJNA715658	iM14B1	Chicken	Austria
SRR14687998	PRJNA715658	iM14A4	Chicken	Austria
SRR14687999	PRJNA715658	cM3C1	Chicken	Austria
SRR14688000	PRJNA715658	cD3B1	Chicken	Austria
SRR14688001	PRJNA715658	iM14A3	Chicken	Austria
SRR14688002	PRJNA715658	iM14A2	Chicken	Austria
SRR14688003	PRJNA715658	iM14A1	Chicken	Austria
SRR14688004	PRJNA715658	iD14F4	Chicken	Austria
SRR14688005	PRJNA715658	iD14F3	Chicken	Austria
SRR14688006	PRJNA715658	iD14F2	Chicken	Austria
SRR14688007	PRJNA715658	iD14F1	Chicken	Austria
SRR14688008	PRJNA715658	iD14E4	Chicken	Austria
SRR14688009	PRJNA715658	iD14E3	Chicken	Austria
SRR14688010	PRJNA715658	iD14E2	Chicken	Austria
SRR14688011	PRJNA715658	cM3B4	Chicken	Austria
SRR14688012	PRJNA715658	iD14E1	Chicken	Austria
SRR14688013	PRJNA715658	iD14D4	Chicken	Austria
SRR14688014	PRJNA715658	iD14D3	Chicken	Austria
SRR14688015	PRJNA715658	iD14D2	Chicken	Austria
SRR14688016	PRJNA715658	iD14D1	Chicken	Austria
SRR14688017	PRJNA715658	iD14C4	Chicken	Austria
SRR14688018	PRJNA715658	iD14C3	Chicken	Austria
SRR14688019	PRJNA715658	iD14C2	Chicken	Austria
SRR14688020	PRJNA715658	iD14C1	Chicken	Austria
SRR14688021	PRJNA715658	iD14B4	Chicken	Austria
SRR14688022	PRJNA715658	cM3B3	Chicken	Austria
SRR14688023	PRJNA715658	iD14B3	Chicken	Austria
SRR14688024	PRJNA715658	iD14B2	Chicken	Austria
SRR14688025	PRJNA715658	iD14B1	Chicken	Austria
SRR14688026	PRJNA715658	iD14A4	Chicken	Austria
SRR14688027	PRJNA715658	iD14A3	Chicken	Austria
SRR14688028	PRJNA715658	sM21F3	Chicken	Austria
SRR14688029	PRJNA715658	sM21F2	Chicken	Austria
SRR14688030	PRJNA715658	sM21F1	Chicken	Austria
SRR14688031	PRJNA715658	sM21E4	Chicken	Austria
SRR14688032	PRJNA715658	fD3E2	Chicken	Austria
SRR14688033	PRJNA715658	sM21E3	Chicken	Austria
SRR14688034	PRJNA715658	sM21E2	Chicken	Austria
SRR14688035	PRJNA715658	sM21E1	Chicken	Austria
SRR14688036	PRJNA715658	sM21D4	Chicken	Austria
SRR14688037	PRJNA715658	sM21D3	Chicken	Austria
SRR14688038	PRJNA715658	sM21D2	Chicken	Austria
SRR14688039	PRJNA715658	sM21D1	Chicken	Austria
SRR14688040	PRJNA715658	sM21C4	Chicken	Austria
SRR14688041	PRJNA715658	sM21C3	Chicken	Austria
SRR14688042	PRJNA715658	sM21C2	Chicken	Austria
SRR14688043	PRJNA715658	fD3E1	Chicken	Austria
SRR14688044	PRJNA715658	sM21C1	Chicken	Austria
SRR14688045	PRJNA715658	sM21B4	Chicken	Austria
SRR14688046	PRJNA715658	sM21B3	Chicken	Austria
SRR14688047	PRJNA715658	sM21B2	Chicken	Austria
SRR14688048	PRJNA715658	sM21B1	Chicken	Austria
SRR14688049	PRJNA715658	sM21A4	Chicken	Austria
SRR14688050	PRJNA715658	sM21A3	Chicken	Austria
SRR14688051	PRJNA715658	sM21A2	Chicken	Austria
SRR14688052	PRJNA715658	sM21A1	Chicken	Austria
SRR14688053	PRJNA715658	iM21F4	Chicken	Austria
SRR14688054	PRJNA715658	fD3D3	Chicken	Austria
SRR14688055	PRJNA715658	iM21F3	Chicken	Austria
SRR14688056	PRJNA715658	iM21F2	Chicken	Austria
SRR14688057	PRJNA715658	iM21F1	Chicken	Austria
SRR14688058	PRJNA715658	iM21E4	Chicken	Austria
SRR14688059	PRJNA715658	iM21E3	Chicken	Austria
SRR14688060	PRJNA715658	iD3E3	Chicken	Austria
SRR14688061	PRJNA715658	cD3C4	Chicken	Austria
SRR14688062	PRJNA715658	cD3A3	Chicken	Austria
SRR14688063	PRJNA715658	cD3A2	Chicken	Austria
SRR15214153	PRJNA748109	CGM-Cecum	Chicken	China
SRR17030618	PRJNA723283	G2_1	Duck	China
SRR17030619	PRJNA723283	G1_9	Duck	China
SRR17030620	PRJNA723283	G1_8	Duck	China
SRR17030621	PRJNA723283	G1_7	Duck	China
SRR17030622	PRJNA723283	G1_6	Duck	China
SRR17030623	PRJNA723283	G1_5	Duck	China
SRR17030624	PRJNA723283	G4_8	Duck	China
SRR17030625	PRJNA723283	G4_7	Duck	China
SRR17030626	PRJNA723283	G4_6	Duck	China
SRR17030627	PRJNA723283	G4_5	Duck	China
SRR17030628	PRJNA723283	G4_4	Duck	China
SRR17030629	PRJNA723283	G1_4	Duck	China
SRR17030630	PRJNA723283	G4_3	Duck	China
SRR17030631	PRJNA723283	G4_2	Duck	China
SRR17030632	PRJNA723283	G4_1	Duck	China
SRR17030633	PRJNA723283	G3_9	Duck	China
SRR17030634	PRJNA723283	G3_8	Duck	China
SRR17030635	PRJNA723283	G3_7	Duck	China
SRR17030636	PRJNA723283	G3_6	Duck	China
SRR17030637	PRJNA723283	G3_5	Duck	China
SRR17030638	PRJNA723283	G3_4	Duck	China
SRR17030639	PRJNA723283	G3_3	Duck	China
SRR17030640	PRJNA723283	G1_3	Duck	China
SRR17030641	PRJNA723283	G3_2	Duck	China
SRR17030642	PRJNA723283	G3_1	Duck	China
SRR17030643	PRJNA723283	G2_9	Duck	China
SRR17030644	PRJNA723283	G2_8	Duck	China
SRR17030645	PRJNA723283	G2_7	Duck	China
SRR17030646	PRJNA723283	G2_6	Duck	China
SRR17030647	PRJNA723283	G2_5	Duck	China
SRR17030648	PRJNA723283	G2_4	Duck	China
SRR17030649	PRJNA723283	G2_3	Duck	China
SRR17030650	PRJNA723283	G2_2	Duck	China
SRR17030651	PRJNA723283	G1_2	Duck	China
SRR17030652	PRJNA723283	G1_1	Duck	China
SRR19631093	PRJNA848116	ZZ3	Duck	China
SRR19631094	PRJNA848116	ZZ2	Duck	China
SRR19631095	PRJNA848116	ZZ1	Duck	China
SRR19631103	PRJNA848116	YC3	Duck	China
SRR19631104	PRJNA848116	YC2	Duck	China
SRR19631105	PRJNA848116	YC1	Duck	China
SRR19631112	PRJNA848116	XZ3	Duck	China
SRR19631113	PRJNA848116	XZ2	Duck	China
SRR19631114	PRJNA848116	XZ1	Duck	China
SRR19631123	PRJNA848116	WZ8	Duck	China
SRR19631124	PRJNA848116	WZ7	Duck	China
SRR19631125	PRJNA848116	WZ6	Duck	China
SRR19631130	PRJNA848116	WF3	Duck	China
SRR19631131	PRJNA848116	WF2	Duck	China
SRR19631132	PRJNA848116	WF1	Duck	China
SRR19631140	PRJNA848116	SS3	Duck	China
SRR19631141	PRJNA848116	SS2	Duck	China
SRR19631142	PRJNA848116	SS1	Duck	China
SRR19631151	PRJNA848116	QZ3	Duck	China
SRR19631152	PRJNA848116	QZ2	Duck	China
SRR19631153	PRJNA848116	QZ1	Duck	China
SRR19631155	PRJNA848116	JH3	Duck	China
SRR19631161	PRJNA848116	MM3	Duck	China
SRR19631162	PRJNA848116	MM2	Duck	China
SRR19631163	PRJNA848116	MM1	Duck	China
SRR19631164	PRJNA848116	LY2	Duck	China
SRR19631165	PRJNA848116	LY1	Duck	China
SRR19631166	PRJNA848116	JH2	Duck	China
SRR19631167	PRJNA848116	JH1	Duck	China
SRR19683890	PRJNA748109	CGM-colorectum	Chicken	China
SRR19683891	PRJNA748109	CGM-duodenum	Chicken	China
SRR19726169	PRJNA748109	CGM-jejunum	Chicken	China
SRR19732514	PRJNA748109	CGM-jejunum	Chicken	China
SRR19732729	PRJNA748109	CGM-colorectum	Chicken	China
SRR19736685	PRJNA748109	CGM-ileum	Chicken	China
SRR19939423	PRJNA850683	LM5	Goose	China
SRR19939424	PRJNA850683	LM4	Goose	China
SRR19939425	PRJNA850683	LM3	Goose	China
SRR19939426	PRJNA850683	LM2	Goose	China
SRR19939427	PRJNA850683	LM1	Goose	China
SRR19939428	PRJNA850683	LD5	Goose	China
SRR19939429	PRJNA850683	LD4	Goose	China
SRR19939430	PRJNA850683	LD3	Goose	China
SRR19939431	PRJNA850683	ZD5	Goose	China
SRR19939432	PRJNA850683	ZD4	Goose	China
SRR19939433	PRJNA850683	ZD3	Goose	China
SRR19939434	PRJNA850683	ZD2	Goose	China
SRR19939435	PRJNA850683	ZD1	Goose	China
SRR19939436	PRJNA850683	LD2	Goose	China
SRR19939437	PRJNA850683	LD1	Goose	China
SRR20115218	PRJNA748109	CGM-Cecum	Chicken	China
SRR20115229	PRJNA748109	CGM-Cecum	Chicken	China
SRR20661404	PRJNA861719	B70.3M	Coturnix	China
SRR20661405	PRJNA861719	B70.3F	Coturnix	China
SRR20661406	PRJNA861719	B70.2M	Coturnix	China
SRR20661407	PRJNA861719	B70.1M	Coturnix	China
SRR20661408	PRJNA861719	B20.9	Coturnix	China
SRR20661409	PRJNA861719	B20.7	Coturnix	China
SRR20661410	PRJNA861719	B20.6	Coturnix	China
SRR20661411	PRJNA861719	H70.6M	Coturnix	China
SRR20661412	PRJNA861719	H70.6F	Coturnix	China
SRR20661413	PRJNA861719	H70.5F	Coturnix	China
SRR20661414	PRJNA861719	H70.4F	Coturnix	China
SRR20661415	PRJNA861719	H70.3M	Coturnix	China
SRR20661416	PRJNA861719	H70.2M	Coturnix	China
SRR20661417	PRJNA861719	H70.2F	Coturnix	China
SRR20661418	PRJNA861719	H70.1M	Coturnix	China
SRR20661419	PRJNA861719	C70.6F	Coturnix	China
SRR20661420	PRJNA861719	C70.5F	Coturnix	China
SRR20661421	PRJNA861719	B20.3	Coturnix	China
SRR20661422	PRJNA861719	C70.4F	Coturnix	China
SRR20661423	PRJNA861719	C70.3M	Coturnix	China
SRR20661424	PRJNA861719	C70.3F	Coturnix	China
SRR20661425	PRJNA861719	C20.6M	Coturnix	China
SRR20661426	PRJNA861719	C20.4F	Coturnix	China
SRR20661427	PRJNA861719	C20.3F	Coturnix	China
SRR20661428	PRJNA861719	C20.2M	Coturnix	China
SRR20661429	PRJNA861719	C20.1F	Coturnix	China
SRR20661430	PRJNA861719	B70.6F	Coturnix	China
SRR20661431	PRJNA861719	B70.5F	Coturnix	China
SRR20661432	PRJNA861719	B20.11	Coturnix	China
SRR20661433	PRJNA861719	B20.2	Coturnix	China
ma2024imeta	PRJNA1064443	ANCeC1	Duck	China
ma2024imeta	PRJNA1064443	ANCeC2	Duck	China
ma2024imeta	PRJNA1064443	ANCeC3	Duck	China
ma2024imeta	PRJNA1064443	ANCeC4	Duck	China
ma2024imeta	PRJNA1064443	ANCeC5	Duck	China
ma2024imeta	PRJNA1064443	ANCeC6	Duck	China
ma2024imeta	PRJNA1064443	ANCeC7	Duck	China
ma2024imeta	PRJNA871932	Ce-1	Duck	China
ma2024imeta	PRJNA1064443	ZJCeC105	Duck	China
ma2024imeta	PRJNA1064443	ZJCeC166	Duck	China
ma2024imeta	PRJNA1064443	ZJCeC192	Duck	China
ma2024imeta	PRJNA1064443	ZJCeC198	Duck	China
ma2024imeta	PRJNA1064443	cec28	Duck	China
ma2024imeta	PRJNA1064443	cec35	Duck	China
ma2024imeta	PRJNA1064443	cec38	Duck	China
ma2024imeta	PRJNA1064443	cec41	Duck	China
ma2024imeta	PRJNA1064443	cec42	Duck	China
ma2024imeta	PRJNA1064443	cec51	Duck	China
ma2024imeta	PRJNA1064443	cec6	Duck	China
ma2024imeta	PRJNA1064443	cec61	Duck	China
ma2024imeta	PRJNA1064443	cec66	Duck	China
ma2024imeta	PRJNA1064443	cec67	Duck	China
ma2024imeta	PRJNA1064443	cec68	Duck	China
ma2024imeta	PRJNA1064443	cec69	Duck	China
ma2024imeta	PRJNA1064443	cec70	Duck	China
ma2024imeta	PRJNA1064443	ZJCeC89	Duck	China
ma2024imeta	PRJNA1064443	FJCeC1	Duck	China
ma2024imeta	PRJNA1064443	FJCeC2	Duck	China
ma2024imeta	PRJNA1064443	FJCeC3	Duck	China
ma2024imeta	PRJNA1064443	FJCeC4	Duck	China
ma2024imeta	PRJNA1064443	FJCeC5	Duck	China
ma2024imeta	PRJNA1064443	FJCeC6	Duck	China
ma2024imeta	PRJNA1064443	GZCeC10	Duck	China
ma2024imeta	PRJNA1064443	GZCeC25	Duck	China
ma2024imeta	PRJNA1064443	GZCeC26	Duck	China
ma2024imeta	PRJNA1064443	GZCeC28	Duck	China
ma2024imeta	PRJNA1064443	GZCeC29	Duck	China
ma2024imeta	PRJNA1064443	GZCeC30	Duck	China
ma2024imeta	PRJNA1064443	GZCeC6	Duck	China
ma2024imeta	PRJNA1064443	GZCeC7	Duck	China
ma2024imeta	PRJNA1064443	GZCeC8	Duck	China
ma2024imeta	PRJNA1064443	GZCeC9	Duck	China
ma2024imeta	PRJNA1064443	HEBCeC10	Duck	China
ma2024imeta	PRJNA1064443	HEBCeC15	Duck	China
ma2024imeta	PRJNA1064443	HEBCeC17	Duck	China
ma2024imeta	PRJNA1064443	HEBCeC18	Duck	China
ma2024imeta	PRJNA1064443	HEBCeC21	Duck	China
ma2024imeta	PRJNA1064443	HEBCeC22	Duck	China
ma2024imeta	PRJNA1064443	HEBCeC25	Duck	China
ma2024imeta	PRJNA1064443	HEBCeC30	Duck	China
ma2024imeta	PRJNA1064443	HEBCeC4	Duck	China
ma2024imeta	PRJNA1064443	HEBCeC5	Duck	China
ma2024imeta	PRJNA1064443	HEBCeC7	Duck	China
ma2024imeta	PRJNA1064443	HEBCeC8	Duck	China
ma2024imeta	PRJNA1064443	HNCeC10	Duck	China
ma2024imeta	PRJNA1064443	HNCeC11	Duck	China
ma2024imeta	PRJNA1064443	HNCeC12	Duck	China
ma2024imeta	PRJNA1064443	HNCeC13	Duck	China
ma2024imeta	PRJNA1064443	HNCeC14	Duck	China
ma2024imeta	PRJNA1064443	HNCeC15	Duck	China
ma2024imeta	PRJNA1064443	HNCeC16	Duck	China
ma2024imeta	PRJNA1064443	HNCeC17	Duck	China
ma2024imeta	PRJNA1064443	HNCeC18	Duck	China
ma2024imeta	PRJNA1064443	HNCeC4	Duck	China
ma2024imeta	PRJNA1064443	HNCeC5	Duck	China
ma2024imeta	PRJNA1064443	HNCeC6	Duck	China
ma2024imeta	PRJNA1064443	HNCeC7	Duck	China
ma2024imeta	PRJNA1064443	HNCeC8	Duck	China
ma2024imeta	PRJNA1064443	MD70dCeC1	Duck	China
ma2024imeta	PRJNA1064443	MD70dCeC2	Duck	China
ma2024imeta	PRJNA1064443	MD70dCeC3	Duck	China
ma2024imeta	PRJNA1064443	MD70dCeC4	Duck	China
ma2024imeta	PRJNA1064443	MD70dCeC5	Duck	China
ma2024imeta	PRJNA1064443	MD70dCeC6	Duck	China
ma2024imeta	PRJNA1064443	PD70dCeC1	Duck	China
ma2024imeta	PRJNA1064443	PD70dCeC2	Duck	China
ma2024imeta	PRJNA1064443	PD70dCeC3	Duck	China
ma2024imeta	PRJNA1064443	PD70dCeC4	Duck	China
ma2024imeta	PRJNA1064443	PD70dCeC5	Duck	China
ma2024imeta	PRJNA1064443	PD70dCeC6	Duck	China
ma2024imeta	PRJNA1064443	QDCeC1	Duck	China
ma2024imeta	PRJNA1064443	QDCeC19	Duck	China
ma2024imeta	PRJNA1064443	QDCeC22	Duck	China
ma2024imeta	PRJNA1064443	QDCeC3	Duck	China
ma2024imeta	PRJNA1064443	QDCeC35	Duck	China
ma2024imeta	PRJNA1064443	WHYCeC1R	Duck	China
ma2024imeta	PRJNA1064443	WHYCeC2R	Duck	China
ma2024imeta	PRJNA1064443	WHYCeC3R	Duck	China
ma2024imeta	PRJNA1064443	WHYCeC4R	Duck	China
ma2024imeta	PRJNA1064443	WHYCeC5R	Duck	China
ma2024imeta	PRJNA1064443	WHYCeC6R	Duck	China
ma2024imeta	PRJNA1064443	WHYCeC7R	Duck	China
ma2024imeta	PRJNA1064443	WNCeC1L	Duck	China
ma2024imeta	PRJNA1064443	WNCeC2L	Duck	China
ma2024imeta	PRJNA1064443	WNFCeC1L	Duck	China
ma2024imeta	PRJNA1064443	WNFCeC2L	Duck	China
ma2024imeta	PRJNA1064443	WNFCeC3L	Duck	China
ma2024imeta	PRJNA1064443	WNFCeC4L	Duck	China
ma2024imeta	PRJNA871932	Ce-10	Duck	China
ma2024imeta	PRJNA871932	Ce-11	Duck	China
ma2024imeta	PRJNA871932	Ce-12	Duck	China
ma2024imeta	PRJNA871932	Ce-13	Duck	China
ma2024imeta	PRJNA871932	Ce-14	Duck	China
ma2024imeta	PRJNA871932	Ce-15	Duck	China
ma2024imeta	PRJNA871932	Ce-16	Duck	China
ma2024imeta	PRJNA871932	Ce-17	Duck	China
ma2024imeta	PRJNA871932	Ce-18	Duck	China
ma2024imeta	PRJNA871932	Ce-19	Duck	China
ma2024imeta	PRJNA871932	Ce-2	Duck	China
ma2024imeta	PRJNA871932	Ce-20	Duck	China
ma2024imeta	PRJNA871932	Ce-21	Duck	China
ma2024imeta	PRJNA871932	Ce-22	Duck	China
ma2024imeta	PRJNA871932	Ce-23	Duck	China
ma2024imeta	PRJNA871932	Ce-24	Duck	China
ma2024imeta	PRJNA871932	Ce-3	Duck	China
ma2024imeta	PRJNA871932	Ce-4	Duck	China
ma2024imeta	PRJNA871932	Ce-5	Duck	China
ma2024imeta	PRJNA871932	Ce-6	Duck	China
ma2024imeta	PRJNA871932	Ce-7	Duck	China
SRR21527943	PRJNA879251	Canada Goose Metagenome 11	Goose	USA
SRR21527944	PRJNA879251	Canada Goose Metagenome 10	Goose	USA
SRR21527945	PRJNA879251	Canada Goose Metagenome 9	Goose	USA
SRR21527946	PRJNA879251	Canada Goose Metagenome 7	Goose	USA
SRR21527947	PRJNA879251	Canada Goose Metagenome 6	Goose	USA
SRR21527948	PRJNA879251	Canada Goose Metagenome 5	Goose	USA
SRR21527956	PRJNA879251	Canada Goose Metagenome 3	Goose	USA
SRR21527967	PRJNA879251	Canada Goose Metagenome 2	Goose	USA
SRR21527968	PRJNA879251	Canada Goose Metagenome 1	Goose	USA
SRR22061885	PRJNA894804	CM.5	Duck	China
SRR22061886	PRJNA894804	CM.4	Duck	China
SRR22061887	PRJNA894804	CM.3	Duck	China
SRR22061888	PRJNA894804	CM.2	Duck	China
SRR22061889	PRJNA894804	DCM.1	Duck	China
SRR22061890	PRJNA894804	DCK.5	Duck	China
SRR22061891	PRJNA894804	DCK.4	Duck	China
SRR22061892	PRJNA894804	DCK.3	Duck	China
SRR22061893	PRJNA894804	MP.5	Duck	China
SRR22061894	PRJNA894804	MP.4	Duck	China
SRR22061895	PRJNA894804	MP.3	Duck	China
SRR22061896	PRJNA894804	MP.2	Duck	China
SRR22061897	PRJNA894804	MP.1	Duck	China
SRR22061898	PRJNA894804	CTC.5	Duck	China
SRR22061899	PRJNA894804	CTC.4	Duck	China
SRR22061900	PRJNA894804	CTC.3	Duck	China
SRR22061901	PRJNA894804	CTC.2	Duck	China
SRR22061902	PRJNA894804	CTC.1	Duck	China
SRR22061903	PRJNA894804	DCK.2	Duck	China
SRR22061904	PRJNA894804	DCK.1	Duck	China
SRR22360814	PRJNA902117	OK437_1	Chicken	Canada
SRR22360815	PRJNA902117	OK337_2	Chicken	Canada
SRR22360816	PRJNA902117	OK537_2	Chicken	Canada
SRR22360817	PRJNA902117	WL637_4	Chicken	Canada
SRR22360818	PRJNA902117	OK437_4	Chicken	Canada
SRR22360819	PRJNA902117	OK537_1	Chicken	Canada
SRR22360820	PRJNA902117	WL457_3	Chicken	Canada
SRR22360821	PRJNA902117	OK467_4	Chicken	Canada
SRR22360822	PRJNA902117	WL357_1	Chicken	Canada
SRR22360823	PRJNA902117	OK437_2	Chicken	Canada
SRR22360824	PRJNA902117	OK367_2	Chicken	Canada
SRR22360825	PRJNA902117	WL457_1	Chicken	Canada
SRR22360826	PRJNA902117	OK637_2	Chicken	Canada
SRR22360827	PRJNA902117	WL357_5	Chicken	Canada
SRR22360828	PRJNA902117	OK637_4	Chicken	Canada
SRR22360829	PRJNA902117	WL457_4	Chicken	Canada
SRR22360830	PRJNA902117	WL357_3	Chicken	Canada
SRR22360831	PRJNA902117	OK467_3	Chicken	Canada
SRR22360832	PRJNA902117	OK467_2	Chicken	Canada
SRR22360833	PRJNA902117	OK337_3	Chicken	Canada
SRR22360834	PRJNA902117	WL437_5	Chicken	Canada
SRR22360835	PRJNA902117	OK567_3	Chicken	Canada
SRR22360836	PRJNA902117	OK667_2	Chicken	Canada
SRR22360837	PRJNA902117	OK537_4	Chicken	Canada
SRR22360838	PRJNA902117	OK337_5	Chicken	Canada
SRR22360839	PRJNA902117	WL337_3	Chicken	Canada
SRR22360840	PRJNA902117	OK537_3	Chicken	Canada
SRR22360841	PRJNA902117	OK537_5	Chicken	Canada
SRR22360842	PRJNA902117	WL337_5	Chicken	Canada
SRR22360843	PRJNA902117	OK437_3	Chicken	Canada
SRR22360844	PRJNA902117	OK337_4	Chicken	Canada
SRR22360845	PRJNA902117	OK437_5	Chicken	Canada
SRR22360846	PRJNA902117	OK337_1	Chicken	Canada
SRR22969613	PRJNA917700	18goose_microbiomes_T8_meta	Goose	China
SRR22969614	PRJNA917700	16goose_microbiomes_T6_meta	Goose	China
SRR22969615	PRJNA917700	14goose_microbiomes_T4_meta	Goose	China
SRR22969616	PRJNA917700	13goose_microbiomes_T3_meta	Goose	China
SRR22969617	PRJNA917700	7goose_microbiomes_CK7_meta	Goose	China
SRR22969618	PRJNA917700	5goose_microbiomes_CK5_meta	Goose	China
SRR22969619	PRJNA917700	3goose_microbiomes_CK3_meta	Goose	China
SRR22969620	PRJNA917700	2goose_microbiomes_CK2_meta	Goose	China
SRR26481332	PRJNA1031251	HS2	Chicken	China
SRR26481333	PRJNA1031251	HS1	Chicken	China
SRR26481334	PRJNA1031251	HG8	Chicken	China
SRR26481335	PRJNA1031251	HG7	Chicken	China
SRR26481336	PRJNA1031251	HG6	Chicken	China
SRR26481337	PRJNA1031251	HG5	Chicken	China
SRR26481338	PRJNA1031251	YC10	Chicken	China
SRR26481339	PRJNA1031251	YC9	Chicken	China
SRR26481340	PRJNA1031251	YC8	Chicken	China
SRR26481341	PRJNA1031251	YC7	Chicken	China
SRR26481342	PRJNA1031251	HG4	Chicken	China
SRR26481343	PRJNA1031251	YC6	Chicken	China
SRR26481344	PRJNA1031251	YC5	Chicken	China
SRR26481345	PRJNA1031251	YC4	Chicken	China
SRR26481346	PRJNA1031251	YC3	Chicken	China
SRR26481347	PRJNA1031251	YC2	Chicken	China
SRR26481348	PRJNA1031251	YC1	Chicken	China
SRR26481349	PRJNA1031251	JZ8	Chicken	China
SRR26481350	PRJNA1031251	JZ7	Chicken	China
SRR26481351	PRJNA1031251	JZ6	Chicken	China
SRR26481352	PRJNA1031251	JZ5	Chicken	China
SRR26481353	PRJNA1031251	HG3	Chicken	China
SRR26481354	PRJNA1031251	JZ4	Chicken	China
SRR26481355	PRJNA1031251	JZ3	Chicken	China
SRR26481356	PRJNA1031251	JZ2	Chicken	China
SRR26481357	PRJNA1031251	JZ1	Chicken	China
SRR26481358	PRJNA1031251	HS8	Chicken	China
SRR26481359	PRJNA1031251	HS7	Chicken	China
SRR26481360	PRJNA1031251	HS6	Chicken	China
SRR26481361	PRJNA1031251	HS5	Chicken	China
SRR26481362	PRJNA1031251	HS4	Chicken	China
SRR26481363	PRJNA1031251	HS3	Chicken	China
SRR26481364	PRJNA1031251	HG2	Chicken	China
SRR26481365	PRJNA1031251	HG1	Chicken	China
SRR26624518	PRJNA1034280	CH_0293	Chicken	United Kingdom
SRR26624519	PRJNA1034280	CH_0288	Chicken	United Kingdom
SRR26624520	PRJNA1034280	CH_0280	Chicken	United Kingdom
SRR26624521	PRJNA1034280	CH_0251	Chicken	United Kingdom
SRR26624522	PRJNA1034280	CH_0245	Chicken	United Kingdom
SRR26624523	PRJNA1034280	CH_0223	Chicken	United Kingdom
SRR26624524	PRJNA1034280	CH_0216	Chicken	United Kingdom
SRR26965292	PRJNA1045870	C-F3	Chicken	China
SRR26965293	PRJNA1045870	C-F2	Chicken	China
SRR26965294	PRJNA1045870	C-F1	Chicken	China
SRR26974994	PRJNA1046219	D-F3	Chicken	China
SRR26974995	PRJNA1046219	D-F2	Chicken	China
SRR26974996	PRJNA1046219	D-F1	Chicken	China
SRR27143223	PRJNA1035987	YZC5_C	Chicken	China
SRR27143224	PRJNA1035987	YZC4_C	Chicken	China
SRR27143225	PRJNA1035987	YZC3_C	Chicken	China
SRR27143226	PRJNA1035987	YZE1_F	Duck	China
SRR27143227	PRJNA1035987	YZY3_E	Duck	China
SRR27143228	PRJNA1035987	YZY2_E	Duck	China
SRR27143229	PRJNA1035987	YZY1_E	Duck	China
SRR27143230	PRJNA1035987	YZC2_C	Chicken	China
SRR27143231	PRJNA1035987	YZG3_D	Pigeon	China
SRR27143232	PRJNA1035987	YZG2_D	Pigeon	China
SRR27143233	PRJNA1035987	YZG1_D	Pigeon	China
SRR27143234	PRJNA1035987	TZC4_C	Chicken	China
SRR27143235	PRJNA1035987	TZC3_C	Chicken	China
SRR27143236	PRJNA1035987	TZC2_C	Chicken	China
SRR27143237	PRJNA1035987	TZC1_C	Chicken	China
SRR27143238	PRJNA1035987	SZC3_C	Chicken	China
SRR27143239	PRJNA1035987	SZC2_C	Chicken	China
SRR27143240	PRJNA1035987	SZC1_C	Chicken	China
SRR27143241	PRJNA1035987	YZC1_C	Chicken	China
SRR27143242	PRJNA1035987	NJC4_C	Chicken	China
SRR27143243	PRJNA1035987	NJC3_C	Chicken	China
SRR27143244	PRJNA1035987	NJC2_C	Chicken	China
SRR27143245	PRJNA1035987	NJC1_C	Chicken	China
SRR27143246	PRJNA1035987	HAC5_C	Chicken	China
SRR27143247	PRJNA1035987	HAC4_C	Chicken	China
SRR27143248	PRJNA1035987	HAC3_C	Chicken	China
SRR27143249	PRJNA1035987	HAC2_C	Chicken	China
SRR27143250	PRJNA1035987	HAC1_C	Chicken	China
SRR27143251	PRJNA1035987	YCC13_C	Chicken	China
SRR27143253	PRJNA1035987	YCC12_C	Chicken	China
SRR27143254	PRJNA1035987	YCC11_C	Chicken	China
SRR27143255	PRJNA1035987	YCC10_C	Chicken	China
SRR27143256	PRJNA1035987	YCC9_C	Chicken	China
SRR27143257	PRJNA1035987	YCC8_C	Chicken	China
SRR27143258	PRJNA1035987	YCC7_C	Chicken	China
SRR27143259	PRJNA1035987	YCC6_C	Chicken	China
SRR27143260	PRJNA1035987	YCC5_C	Chicken	China
SRR27143261	PRJNA1035987	YCC4_C	Chicken	China
SRR27143262	PRJNA1035987	YCC3_C	Chicken	China
SRR27143264	PRJNA1035987	YCC2_C	Chicken	China
SRR27143265	PRJNA1035987	YCC1_C	Chicken	China
SRR27143266	PRJNA1035987	NTC13_C	Chicken	China
SRR27143267	PRJNA1035987	NTC12_C	Chicken	China
SRR27143268	PRJNA1035987	NTC11_C	Chicken	China
SRR27143269	PRJNA1035987	NTC10_C	Chicken	China
SRR27143270	PRJNA1035987	NTC9_C	Chicken	China
SRR27143271	PRJNA1035987	NTC8_C	Chicken	China
SRR27143272	PRJNA1035987	NTC7_C	Chicken	China
SRR27143273	PRJNA1035987	NTC6_C	Chicken	China
SRR27143275	PRJNA1035987	NTC5_C	Chicken	China
SRR27143276	PRJNA1035987	NTC4_C	Chicken	China
SRR27143277	PRJNA1035987	NTC3_C	Chicken	China
SRR27143278	PRJNA1035987	NTC2_C	Chicken	China
SRR27143279	PRJNA1035987	NTC1_C	Chicken	China
SRR27143280	PRJNA1035987	YZC10_C	Chicken	China
SRR27143281	PRJNA1035987	YZC9_C	Chicken	China
SRR27143282	PRJNA1035987	YZC8_C	Chicken	China
SRR27143283	PRJNA1035987	YZC7_C	Chicken	China
SRR27143284	PRJNA1035987	YZC6_C	Chicken	China
ma2024imeta	PRJNA871932	Ce-8	Duck	China
ma2024imeta	PRJNA871932	Ce-9	Duck	China
ma2024imeta	PRJNA1064443	cec1	Duck	China
ma2024imeta	PRJNA1064443	cec10	Duck	China
ma2024imeta	PRJNA1064443	cec11	Duck	China
ma2024imeta	PRJNA1064443	cec12	Duck	China
ma2024imeta	PRJNA1064443	cec13	Duck	China
ma2024imeta	PRJNA1064443	cec14	Duck	China
ma2024imeta	PRJNA1064443	cec15	Duck	China
ma2024imeta	PRJNA1064443	cec16	Duck	China
ma2024imeta	PRJNA1064443	cec17	Duck	China
ma2024imeta	PRJNA1064443	cec18	Duck	China
ma2024imeta	PRJNA1064443	cec19	Duck	China
ma2024imeta	PRJNA1064443	cec2	Duck	China
ma2024imeta	PRJNA1064443	cec20	Duck	China
ma2024imeta	PRJNA1064443	cec21	Duck	China
ma2024imeta	PRJNA1064443	cec22	Duck	China
ma2024imeta	PRJNA1064443	cec23	Duck	China
ma2024imeta	PRJNA1064443	cec24	Duck	China
ma2024imeta	PRJNA1064443	cec25	Duck	China
ma2024imeta	PRJNA1064443	cec26	Duck	China
ma2024imeta	PRJNA1064443	cec27	Duck	China
ma2024imeta	PRJNA1064443	cec29	Duck	China
ma2024imeta	PRJNA1064443	cec3	Duck	China
SRR27748163	PRJNA1069780	HASD3805	Chicken	China
SRR27748164	PRJNA1069780	HASD3804	Chicken	China
SRR27748165	PRJNA1069780	HASD3803	Chicken	China
SRR27748166	PRJNA1069780	HASD3802	Chicken	China
SRR27748167	PRJNA1069780	HASD3801	Chicken	China
SRR27748168	PRJNA1069780	HAD3805	Chicken	China
SRR27748169	PRJNA1069780	SD3805	Chicken	China
SRR27748170	PRJNA1069780	SD3804	Chicken	China
SRR27748171	PRJNA1069780	SD3803	Chicken	China
SRR27748172	PRJNA1069780	SD3802	Chicken	China
SRR27748173	PRJNA1069780	SD3801	Chicken	China
SRR27748174	PRJNA1069780	NCD3805	Chicken	China
SRR27748175	PRJNA1069780	NCD3804	Chicken	China
SRR27748176	PRJNA1069780	NCD3803	Chicken	China
SRR27748177	PRJNA1069780	NCD3802	Chicken	China
SRR27748178	PRJNA1069780	NCD3801	Chicken	China
SRR27748179	PRJNA1069780	HAD3804	Chicken	China
SRR27748180	PRJNA1069780	MASD3805	Chicken	China
SRR27748181	PRJNA1069780	MASD3804	Chicken	China
SRR27748182	PRJNA1069780	MASD3803	Chicken	China
SRR27748183	PRJNA1069780	MASD3802	Chicken	China
SRR27748184	PRJNA1069780	MASD3801	Chicken	China
SRR27748185	PRJNA1069780	MAD3805	Chicken	China
SRR27748186	PRJNA1069780	MAD3804	Chicken	China
SRR27748187	PRJNA1069780	MAD3803	Chicken	China
SRR27748188	PRJNA1069780	MAD3802	Chicken	China
SRR27748189	PRJNA1069780	MAD3801	Chicken	China
SRR27748190	PRJNA1069780	HAD3803	Chicken	China
SRR27748191	PRJNA1069780	LASD3805	Chicken	China
SRR27748192	PRJNA1069780	LASD3804	Chicken	China
SRR27748193	PRJNA1069780	LASD3803	Chicken	China
SRR27748194	PRJNA1069780	LASD3802	Chicken	China
SRR27748195	PRJNA1069780	LASD3801	Chicken	China
SRR27748196	PRJNA1069780	LAD3805	Chicken	China
SRR27748197	PRJNA1069780	LAD3804	Chicken	China
SRR27748198	PRJNA1069780	LAD3803	Chicken	China
SRR27748199	PRJNA1069780	LAD3802	Chicken	China
SRR27748200	PRJNA1069780	LAD3801	Chicken	China
SRR27748201	PRJNA1069780	HAD3802	Chicken	China
SRR27748202	PRJNA1069780	HAD3801	Chicken	China
ma2024imeta	PRJNA1064443	cec30	Duck	China
ma2024imeta	PRJNA1064443	cec31	Duck	China
ma2024imeta	PRJNA1064443	cec32	Duck	China
ma2024imeta	PRJNA1064443	cec33	Duck	China
ma2024imeta	PRJNA1064443	cec34	Duck	China
ma2024imeta	PRJNA1064443	cec36	Duck	China
ma2024imeta	PRJNA1064443	cec37	Duck	China
ma2024imeta	PRJNA1064443	cec39	Duck	China
ma2024imeta	PRJNA1064443	cec4	Duck	China
ma2024imeta	PRJNA1064443	cec40	Duck	China
SRR29266636	PRJNA1118495	TAI1	Goose	China
SRR29266637	PRJNA1118495	KANG3	Goose	China
SRR29266638	PRJNA1118495	KANG2	Goose	China
SRR29266639	PRJNA1118495	KANG1	Goose	China
SRR29266640	PRJNA1118495	YANG3	Goose	China
SRR29266641	PRJNA1118495	YANG2	Goose	China
SRR29266642	PRJNA1118495	YANG1	Goose	China
SRR29266643	PRJNA1118495	YIN3	Goose	China
SRR29266644	PRJNA1118495	TAI3	Goose	China
SRR29266645	PRJNA1118495	TAI2	Goose	China
SRR29266646	PRJNA1118495	YIN2	Goose	China
SRR29266647	PRJNA1118495	YIN1	Goose	China
ma2024imeta	PRJNA1064443	cec43	Duck	China
ma2024imeta	PRJNA1064443	cec44	Duck	China
ma2024imeta	PRJNA1064443	cec45	Duck	China
ma2024imeta	PRJNA1064443	cec46	Duck	China
ma2024imeta	PRJNA1064443	cec47	Duck	China
ma2024imeta	PRJNA1064443	cec48	Duck	China
ma2024imeta	PRJNA1064443	cec49	Duck	China
ma2024imeta	PRJNA1064443	cec5	Duck	China
ma2024imeta	PRJNA1064443	cec50	Duck	China
ma2024imeta	PRJNA1064443	cec52	Duck	China
ma2024imeta	PRJNA1064443	cec53	Duck	China
ma2024imeta	PRJNA1064443	cec54	Duck	China
ma2024imeta	PRJNA1064443	cec55	Duck	China
ma2024imeta	PRJNA1064443	cec56	Duck	China
ma2024imeta	PRJNA1064443	cec57	Duck	China
ma2024imeta	PRJNA1064443	cec58	Duck	China
ma2024imeta	PRJNA1064443	cec59	Duck	China
ma2024imeta	PRJNA1064443	cec60	Duck	China
ma2024imeta	PRJNA1064443	cec62	Duck	China
ma2024imeta	PRJNA1064443	cec63	Duck	China
ma2024imeta	PRJNA1064443	cec64	Duck	China
ma2024imeta	PRJNA1064443	cec65	Duck	China
ma2024imeta	PRJNA1064443	cec7	Duck	China
ma2024imeta	PRJNA1064443	cec71	Duck	China
ma2024imeta	PRJNA1064443	cec72	Duck	China
ma2024imeta	PRJNA1064443	cec73	Duck	China
ma2024imeta	PRJNA1064443	cec74	Duck	China
ma2024imeta	PRJNA1064443	cec75	Duck	China
ma2024imeta	PRJNA1064443	cec76	Duck	China
ma2024imeta	PRJNA1064443	cec77	Duck	China
ma2024imeta	PRJNA1064443	cec78	Duck	China
ma2024imeta	PRJNA1064443	cec79	Duck	China
ma2024imeta	PRJNA1064443	cec8	Duck	China
ma2024imeta	PRJNA1064443	cec80	Duck	China
ma2024imeta	PRJNA1064443	cec9	Duck	China
ma2024imeta	PRJNA871932	CoC-1	Duck	China
ma2024imeta	PRJNA871932	CoC-10	Duck	China
ma2024imeta	PRJNA871932	CoC-11	Duck	China
ma2024imeta	PRJNA871932	CoC-12	Duck	China
ma2024imeta	PRJNA871932	CoC-13	Duck	China
ma2024imeta	PRJNA871932	CoC-14	Duck	China
ma2024imeta	PRJNA871932	CoC-15	Duck	China
ma2024imeta	PRJNA871932	CoC-16	Duck	China
ma2024imeta	PRJNA871932	CoC-17	Duck	China
ma2024imeta	PRJNA871932	CoC-18	Duck	China
ma2024imeta	PRJNA871932	CoC-19	Duck	China
ma2024imeta	PRJNA871932	CoC-2	Duck	China
ma2024imeta	PRJNA871932	CoC-20	Duck	China
ma2024imeta	PRJNA871932	CoC-21	Duck	China
ma2024imeta	PRJNA871932	CoC-22	Duck	China
ma2024imeta	PRJNA871932	CoC-23	Duck	China
ma2024imeta	PRJNA871932	CoC-24	Duck	China
ma2024imeta	PRJNA871932	CoC-3	Duck	China
ma2024imeta	PRJNA871932	CoC-4	Duck	China
ma2024imeta	PRJNA871932	CoC-5	Duck	China
ma2024imeta	PRJNA871932	CoC-6	Duck	China
ma2024imeta	PRJNA871932	CoC-7	Duck	China
ma2024imeta	PRJNA871932	CoC-8	Duck	China
ma2024imeta	PRJNA871932	CoC-9	Duck	China
ma2024imeta	PRJNA871932	du-1	Duck	China
ma2024imeta	PRJNA871932	du-10	Duck	China
ma2024imeta	PRJNA871932	du-11	Duck	China
ma2024imeta	PRJNA871932	du-12	Duck	China
ma2024imeta	PRJNA871932	du-13	Duck	China
ma2024imeta	PRJNA871932	du-14	Duck	China
ma2024imeta	PRJNA871932	du-15	Duck	China
ma2024imeta	PRJNA871932	du-16	Duck	China
ma2024imeta	PRJNA871932	du-17	Duck	China
ma2024imeta	PRJNA871932	du-18	Duck	China
ma2024imeta	PRJNA871932	du-19	Duck	China
ma2024imeta	PRJNA871932	du-2	Duck	China
ma2024imeta	PRJNA871932	du-20	Duck	China
ma2024imeta	PRJNA871932	du-21	Duck	China
ma2024imeta	PRJNA871932	du-22	Duck	China
ma2024imeta	PRJNA871932	du-23	Duck	China
ma2024imeta	PRJNA871932	du-3	Duck	China
ma2024imeta	PRJNA871932	du-4	Duck	China
ma2024imeta	PRJNA871932	du-5	Duck	China
ma2024imeta	PRJNA871932	du-6	Duck	China
ma2024imeta	PRJNA871932	du-7	Duck	China
ma2024imeta	PRJNA871932	du-8	Duck	China
ma2024imeta	PRJNA871932	du-9	Duck	China
ma2024imeta	PRJNA1064443	GZCeC24	Duck	China
ma2024imeta	PRJNA1064443	GZCeC27	Duck	China
ma2024imeta	PRJNA871932	Il-1	Duck	China
ma2024imeta	PRJNA871932	Il-10	Duck	China
ma2024imeta	PRJNA871932	Il-11	Duck	China
ma2024imeta	PRJNA871932	Il-12	Duck	China
ma2024imeta	PRJNA871932	Il-13	Duck	China
ma2024imeta	PRJNA871932	Il-14	Duck	China
ma2024imeta	PRJNA871932	Il-15	Duck	China
ma2024imeta	PRJNA871932	Il-16	Duck	China
ma2024imeta	PRJNA871932	Il-17	Duck	China
ma2024imeta	PRJNA871932	Il-18	Duck	China
ma2024imeta	PRJNA871932	Il-19	Duck	China
ma2024imeta	PRJNA871932	Il-2	Duck	China
ma2024imeta	PRJNA871932	Il-20	Duck	China
ma2024imeta	PRJNA871932	Il-21	Duck	China
ma2024imeta	PRJNA871932	Il-22	Duck	China
ma2024imeta	PRJNA871932	Il-23	Duck	China
ma2024imeta	PRJNA871932	Il-24	Duck	China
ma2024imeta	PRJNA871932	Il-3	Duck	China
ma2024imeta	PRJNA871932	Il-4	Duck	China
ma2024imeta	PRJNA871932	Il-5	Duck	China
ma2024imeta	PRJNA871932	Il-6	Duck	China
ma2024imeta	PRJNA871932	Il-7	Duck	China
ma2024imeta	PRJNA871932	Il-8	Duck	China
ma2024imeta	PRJNA871932	Il-9	Duck	China
ma2024imeta	PRJNA1064443	Ile1	Duck	China
ma2024imeta	PRJNA1064443	Ile10	Duck	China
ma2024imeta	PRJNA1064443	Ile11	Duck	China
ma2024imeta	PRJNA1064443	Ile12	Duck	China
ma2024imeta	PRJNA1064443	Ile13	Duck	China
ma2024imeta	PRJNA1064443	Ile14	Duck	China
ma2024imeta	PRJNA1064443	Ile15	Duck	China
ma2024imeta	PRJNA1064443	Ile16	Duck	China
ma2024imeta	PRJNA1064443	Ile17	Duck	China
ma2024imeta	PRJNA1064443	Ile18	Duck	China
ma2024imeta	PRJNA1064443	Ile19	Duck	China
ma2024imeta	PRJNA1064443	Ile2	Duck	China
ma2024imeta	PRJNA1064443	Ile20	Duck	China
ma2024imeta	PRJNA1064443	Ile21	Duck	China
ma2024imeta	PRJNA1064443	Ile22	Duck	China
ma2024imeta	PRJNA1064443	Ile23	Duck	China
ma2024imeta	PRJNA1064443	Ile24	Duck	China
ma2024imeta	PRJNA1064443	Ile3	Duck	China
ma2024imeta	PRJNA1064443	Ile4	Duck	China
ma2024imeta	PRJNA1064443	Ile5	Duck	China
ma2024imeta	PRJNA1064443	Ile6	Duck	China
ma2024imeta	PRJNA1064443	Ile7	Duck	China
ma2024imeta	PRJNA1064443	Ile8	Duck	China
ma2024imeta	PRJNA1064443	Ile9	Duck	China
ma2024imeta	PRJNA871932	je-1	Duck	China
ma2024imeta	PRJNA871932	je-10	Duck	China
ma2024imeta	PRJNA871932	je-11	Duck	China
ma2024imeta	PRJNA871932	je-12	Duck	China
ma2024imeta	PRJNA871932	je-13	Duck	China
ma2024imeta	PRJNA871932	je-14	Duck	China
ma2024imeta	PRJNA871932	je-15	Duck	China
ma2024imeta	PRJNA871932	je-16	Duck	China
ma2024imeta	PRJNA871932	je-17	Duck	China
ma2024imeta	PRJNA871932	je-18	Duck	China
ma2024imeta	PRJNA871932	je-19	Duck	China
ma2024imeta	PRJNA871932	je-2	Duck	China
ma2024imeta	PRJNA871932	je-20	Duck	China
ma2024imeta	PRJNA871932	je-21	Duck	China
ma2024imeta	PRJNA871932	je-22	Duck	China
ma2024imeta	PRJNA871932	je-23	Duck	China
ma2024imeta	PRJNA871932	je-24	Duck	China
ma2024imeta	PRJNA871932	je-3	Duck	China
ma2024imeta	PRJNA871932	je-4	Duck	China
ma2024imeta	PRJNA871932	je-5	Duck	China
ma2024imeta	PRJNA871932	je-6	Duck	China
ma2024imeta	PRJNA871932	je-7	Duck	China
ma2024imeta	PRJNA871932	je-8	Duck	China
ma2024imeta	PRJNA871932	je-9	Duck	China
ma2024imeta	PRJNA1064443	JSCeC1	Duck	China
ma2024imeta	PRJNA1064443	JSCeC2	Duck	China
ma2024imeta	PRJNA1064443	JSCeC3	Duck	China
ma2024imeta	PRJNA1064443	JSCeC4	Duck	China
ma2024imeta	PRJNA1064443	JSCeC5	Duck	China
ma2024imeta	PRJNA1064443	JSCeC6	Duck	China
ma2024imeta	PRJNA1064443	QDCeC14	Duck	China
ma2024imeta	PRJNA1064443	QDCeC15	Duck	China
ma2024imeta	PRJNA1064443	QDCeC2	Duck	China
ma2024imeta	PRJNA1064443	QDCeC29	Duck	China
ma2024imeta	PRJNA1064443	QDCeC30	Duck	China
ma2024imeta	PRJNA1064443	QDCeC31	Duck	China
ma2024imeta	PRJNA1064443	SDCeC1	Duck	China
ma2024imeta	PRJNA1064443	SDCeC2	Duck	China
ma2024imeta	PRJNA1064443	SDCeC3	Duck	China
ma2024imeta	PRJNA1064443	SDCeC4	Duck	China
ma2024imeta	PRJNA1064443	SDCeC5	Duck	China
ma2024imeta	PRJNA1064443	SDCeC6	Duck	China
ma2024imeta	PRJNA1064443	SHCeC1	Duck	China
ma2024imeta	PRJNA1064443	SHCeC12	Duck	China
ma2024imeta	PRJNA1064443	SHCeC15	Duck	China
ma2024imeta	PRJNA1064443	SHCeC16	Duck	China
ma2024imeta	PRJNA1064443	SHCeC17	Duck	China
ma2024imeta	PRJNA1064443	SHCeC18	Duck	China
ma2024imeta	PRJNA1064443	SHCeC24	Duck	China
ma2024imeta	PRJNA1064443	SHCeC26	Duck	China
ma2024imeta	PRJNA1064443	SHCeC27	Duck	China
ma2024imeta	PRJNA1064443	SHCeC28	Duck	China
ma2024imeta	PRJNA1064443	SHCeC4	Duck	China
ma2024imeta	PRJNA1064443	SHCeC7	Duck	China
ma2024imeta	PRJNA1064443	SSCeC1	Duck	China
ma2024imeta	PRJNA1064443	SSCeC10	Duck	China
ma2024imeta	PRJNA1064443	SSCeC2	Duck	China
ma2024imeta	PRJNA1064443	SSCeC3	Duck	China
ma2024imeta	PRJNA1064443	SSCeC4	Duck	China
ma2024imeta	PRJNA1064443	SSCeC5	Duck	China
ma2024imeta	PRJNA1064443	SSCeC6	Duck	China
ma2024imeta	PRJNA1064443	SSCeC7	Duck	China
ma2024imeta	PRJNA1064443	SSCeC8	Duck	China
ma2024imeta	PRJNA1064443	SSCeC9	Duck	China
ma2024imeta	PRJNA1064443	SXCeC1	Duck	China
ma2024imeta	PRJNA1064443	SXCeC2	Duck	China
ma2024imeta	PRJNA1064443	SXCeC3	Duck	China
ma2024imeta	PRJNA1064443	SXCeC4	Duck	China
ma2024imeta	PRJNA1064443	SXCeC5	Duck	China
ma2024imeta	PRJNA1064443	SXCeC6	Duck	China
ma2024imeta	PRJNA1064443	WHYCeC8R	Duck	China
ma2024imeta	PRJNA1064443	ZJCeC28	Duck	China
ma2024imeta	PRJNA1064443	ZJCeC38	Duck	China
ma2024imeta	PRJNA1064443	ZJCeC67	Duck	China
ma2024imeta	PRJNA1064443	ZJCeC68	Duck	China
ma2024imeta	PRJNA1064443	ZJZJCeC6	Duck	China
SRR6323082	PRJNA417359	CHCFD04200	Chicken	China
SRR6323083	PRJNA417359	CHCFD02800	Chicken	China
SRR6323084	PRJNA417359	CHCFD05602	Chicken	China
SRR6323085	PRJNA417359	CHCFD05601	Chicken	China
SRR6323086	PRJNA417359	CHCFI00700	Chicken	China
SRR6323087	PRJNA417359	CHCFD05603	Chicken	China
SRR6323088	PRJNA417359	DGYFC06201	Chicken	China
SRR6323089	PRJNA417359	DGYFC06202	Chicken	China
SRR6323090	PRJNA417359	DSTFR04003	Chicken	China
SRR6323091	PRJNA417359	DSTFR04002	Chicken	China
SRR6323092	PRJNA417359	DSTFJ04002	Chicken	China
SRR6323093	PRJNA417359	DSTFJ04001	Chicken	China
SRR6323094	PRJNA417359	DSTFR04001	Chicken	China
SRR6323095	PRJNA417359	DSTFJ04003	Chicken	China
SRR6323096	PRJNA417359	DSTFI04001	Chicken	China
SRR6323097	PRJNA417359	DSTFD04003	Chicken	China
SRR6323098	PRJNA417359	DSTFI04003	Chicken	China
SRR6323099	PRJNA417359	DSTFI04002	Chicken	China
SRR6323100	PRJNA417359	CBJMC04203	Chicken	China
SRR6323101	PRJNA417359	CBJMD00700	Chicken	China
SRR6323102	PRJNA417359	CBJMC04201	Chicken	China
SRR6323103	PRJNA417359	CBJMC04202	Chicken	China
SRR6323104	PRJNA417359	CBJMC02800	Chicken	China
SRR6323105	PRJNA417359	CBJMC04200	Chicken	China
SRR6323106	PRJNA417359	CBJMC00700	Chicken	China
SRR6323107	PRJNA417359	CBJMC01400	Chicken	China
SRR6323108	PRJNA417359	DGYFI06203	Chicken	China
SRR6323109	PRJNA417359	CBJMD01400	Chicken	China
SRR6323110	PRJNA417359	CBJMD02800	Chicken	China
SRR6323111	PRJNA417359	MBJMR04202	Chicken	China
SRR6323112	PRJNA417359	MBJMR04203	Chicken	China
SRR6323113	PRJNA417359	DSLMJ04102	Chicken	China
SRR6323114	PRJNA417359	DSLMJ04103	Chicken	China
SRR6323115	PRJNA417359	DSLMR04101	Chicken	China
SRR6323116	PRJNA417359	DSLMR04102	Chicken	China
SRR6323117	PRJNA417359	DSLMR04103	Chicken	China
SRR6323118	PRJNA417359	DSTFC04001	Chicken	China
SRR6323119	PRJNA417359	DSTFC04002	Chicken	China
SRR6323120	PRJNA417359	DSTFC04003	Chicken	China
SRR6323121	PRJNA417359	DSTFD04001	Chicken	China
SRR6323122	PRJNA417359	DSTFD04002	Chicken	China
SRR6323123	PRJNA417359	LBJMC04201	Chicken	China
SRR6323124	PRJNA417359	LBJMC04200	Chicken	China
SRR6323125	PRJNA417359	MHCFC02800	Chicken	China
SRR6323126	PRJNA417359	NBJMC01400	Chicken	China
SRR6323127	PRJNA417359	NBJMC00700	Chicken	China
SRR6323128	PRJNA417359	NBJMC00100	Chicken	China
SRR6323129	PRJNA417359	MHCFR05603	Chicken	China
SRR6323130	PRJNA417359	MHCFR05602	Chicken	China
SRR6323131	PRJNA417359	MHCFR05601	Chicken	China
SRR6323132	PRJNA417359	MHCFR04200	Chicken	China
SRR6323133	PRJNA417359	MHCFR02800	Chicken	China
SRR6323134	PRJNA417359	NBJMC04200	Chicken	China
SRR6323135	PRJNA417359	NBJMC02800	Chicken	China
SRR6323136	PRJNA417359	HHCFR00700	Chicken	China
SRR6323137	PRJNA417359	HHCFR01400	Chicken	China
[truncated: 660 more rows]
